# Supplementary material for: Large-scale comparison of machine learning methods for drug target prediction on ChEMBL
Source: Royal Society of Chemistry journal article supplement (doi:10.1039/c8sc00148k), 2018-01-01
Supplement: c8sc00148k2.csv [file c8sc00148k2.csv]

	clustTrueTrain0	clustFalseTrain0	clustTrueTrain1	clustFalseTrain1	clustTrueTrain2	clustFalseTrain2	clustTrue0	clustFalse0	clustTrue1	clustFalse1	clustTrue2	clustFalse2
CHEMBL1614338	20	4	27	5	21	3	14	2	7	1	13	3
CHEMBL1243971	5	4	21	21	20	19	18	18	2	1	3	3
CHEMBL1614044	41	12	18	12	43	8	10	4	33	4	8	8
CHEMBL2045986	79	6	67	2	30	6	9	1	21	5	58	1
CHEMBL618396	45	7	33	4	50	9	19	3	31	6	14	1
CHEMBL3079731	37	3	55	9	58	8	38	7	20	1	17	2
CHEMBL1794498	27	34	41	38	26	36	20	20	6	16	21	18
CHEMBL2091156	62	14	24	8	58	12	10	3	48	9	14	5
CHEMBL2363253	28	21	24	25	28	24	12	14	16	10	12	11
CHEMBL1738192	13	59	9	45	12	64	4	25	8	39	5	20
CHEMBL1614154	62	7	52	6	76	7	33	3	43	4	19	3
CHEMBL1964055	58	7	61	9	61	4	32	3	29	1	29	6
CHEMBL2363800	21	36	18	30	19	34	8	14	11	20	10	16
CHEMBL1794420	28	33	39	40	25	37	18	22	7	15	21	18
CHEMBL2363263	24	25	19	32	17	29	6	18	11	11	13	14
CHEMBL2363552	18	33	18	32	14	43	7	21	7	22	11	11
CHEMBL2363168	18	34	23	29	25	35	15	15	10	20	8	14
CHEMBL3214806	59	8	60	6	69	6	35	2	34	4	25	4
CHEMBL1794455	29	32	41	38	26	36	19	21	7	15	22	17
CHEMBL1613998	62	12	57	12	63	10	29	5	34	5	28	7
CHEMBL1614056	11	57	13	61	14	46	8	25	6	21	5	36
CHEMBL1613903	30	38	34	40	24	36	14	19	10	17	20	21
CHEMBL2363184	13	51	11	48	14	51	6	24	8	27	5	24
CHEMBL1738619	15	57	8	56	11	55	2	27	9	28	6	29
CHEMBL2363227	20	40	18	38	20	42	9	20	11	22	9	18
CHEMBL1738514	48	20	49	16	51	18	26	7	25	11	23	9
CHEMBL2114927	16	59	9	67	9	54	1	31	8	23	8	36
CHEMBL763093	53	14	33	15	58	23	19	12	39	11	14	3
CHEMBL1614525	28	30	32	40	36	34	20	22	16	12	12	18
CHEMBL2114803	51	18	54	14	57	16	30	6	27	10	24	8
CHEMBL1613775	34	29	47	28	41	27	27	13	14	14	20	15
CHEMBL1614373	48	21	50	23	50	22	26	12	24	10	24	11
CHEMBL1614070	13	4	17	5	22	3	13	2	9	1	4	3
CHEMBL1026934	74	3	52	4	76	5	27	3	49	2	25	1
CHEMBL1026933	37	22	7	17	40	19	5	7	35	12	2	10
CHEMBL2363723	21	33	17	32	18	35	7	17	11	18	10	15
CHEMBL864855	75	7	78	7	9	2	6	1	3	1	72	6
CHEMBL772766	19	33	9	33	18	48	4	24	14	24	5	9
CHEMBL806152	16	23	17	12	21	15	11	2	10	13	6	10
CHEMBL1613812	20	4	51	3	55	3	43	1	12	2	8	2
CHEMBL2363265	25	35	26	28	23	37	12	15	11	22	14	13
CHEMBL1024480	4	34	4	34	2	18	1	9	1	9	3	25
CHEMBL2363541	23	42	21	41	20	41	9	20	11	21	12	21
CHEMBL1614177	4	64	4	57	2	63	1	28	1	35	3	29
CHEMBL1804798	17	34	14	37	9	31	3	17	6	14	11	20
CHEMBL3111191	11	60	4	41	13	91	3	36	10	55	1	5
CHEMBL1031359	56	3	90	3	46	2	40	1	6	1	50	2
CHEMBL2363544	25	42	27	33	24	43	13	17	11	26	14	16
CHEMBL2363339	24	28	19	30	25	26	10	14	15	12	9	16
CHEMBL2363169	21	33	17	35	20	42	8	22	12	20	9	13
CHEMBL2363165	14	30	18	30	20	34	12	17	8	17	6	13
CHEMBL1738313	34	39	23	44	31	37	10	21	21	16	13	23
CHEMBL2363531	20	38	20	31	22	37	11	15	11	22	9	16
CHEMBL2363621	28	38	25	36	25	38	11	18	14	20	14	18
CHEMBL1614265	44	14	39	16	39	14	17	8	22	6	22	8
CHEMBL1738092	62	12	59	8	67	10	32	3	35	7	27	5
CHEMBL1614380	20	65	10	62	16	37	3	17	13	20	7	45
CHEMBL2363420	27	36	28	33	31	29	16	13	15	16	12	20
CHEMBL2354307	56	6	86	8	76	8	53	5	23	3	33	3
CHEMBL2363375	29	26	25	26	24	26	10	13	14	13	15	13
CHEMBL1738423	21	59	9	50	22	57	5	24	17	33	4	26
CHEMBL3214828	30	46	34	38	42	34	23	13	19	21	11	25
CHEMBL2114883	42	36	44	30	34	32	18	13	16	19	26	17
CHEMBL1614408	52	26	41	26	59	24	24	12	35	12	17	14
CHEMBL872182	21	41	21	26	16	33	8	9	8	24	13	17
CHEMBL2363299	28	29	29	26	35	25	18	11	17	14	11	15
CHEMBL1820680	22	17	4	10	24	17	3	5	21	12	1	5
CHEMBL663474	14	4	70	13	78	11	67	10	11	1	3	3
CHEMBL2363268	27	39	29	33	28	40	15	17	13	23	14	16
CHEMBL2363393	24	42	21	33	21	41	9	16	12	25	12	17
CHEMBL1737862	62	19	34	24	66	13	19	9	47	4	15	15
CHEMBL2363642	28	35	26	30	24	35	11	15	13	20	15	15
CHEMBL3215144	58	15	62	10	58	15	31	5	27	10	31	5
CHEMBL2363467	23	34	25	30	20	36	11	16	9	20	14	14
CHEMBL2363174	30	34	25	36	29	36	12	19	17	17	13	17
CHEMBL1614417	56	22	45	22	65	18	27	9	38	9	18	13
CHEMBL1614539	35	9	54	8	57	7	38	3	19	4	16	5
CHEMBL1738684	65	8	58	12	61	8	27	6	34	2	31	6
CHEMBL3214981	66	5	69	10	67	9	35	7	32	2	34	3
CHEMBL2363321	14	51	16	46	12	51	7	23	5	28	9	23
CHEMBL3111197	6	65	9	36	13	91	8	31	5	60	1	5
CHEMBL2114718	64	13	56	11	68	14	30	6	38	8	26	5
CHEMBL1963857	47	25	37	29	48	32	19	18	29	14	18	11
CHEMBL2363453	20	38	18	36	18	42	8	20	10	22	10	16
CHEMBL2363176	36	27	38	17	40	22	21	6	19	16	17	11
CHEMBL1963849	55	26	69	13	70	15	42	1	28	14	27	12
CHEMBL1614210	34	55	24	42	40	51	15	19	25	32	9	23
CHEMBL2354260	23	36	40	45	35	37	26	23	9	14	14	22
CHEMBL2363449	11	57	11	56	10	61	5	30	5	31	6	26
CHEMBL1614482	22	39	35	42	33	53	23	28	10	25	12	14
CHEMBL1614220	47	28	60	23	61	31	37	13	24	18	23	10
CHEMBL2114914	65	15	56	14	55	17	23	8	32	9	33	6
CHEMBL2363438	32	27	31	30	33	29	16	16	17	13	15	14
CHEMBL1613956	53	33	43	26	52	31	21	12	31	19	22	14
CHEMBL1613806	32	29	39	38	43	43	25	26	18	17	14	12
CHEMBL1614450	81	10	59	5	86	11	32	3	54	8	27	2
CHEMBL1167052	4	5	73	13	71	14	70	11	1	3	3	2
CHEMBL1002712	49	21	50	21	47	12	24	6	23	6	26	15
CHEMBL3111194	9	62	6	39	13	91	5	34	8	57	1	5
CHEMBL1613859	16	46	11	39	19	39	7	16	12	23	4	23
CHEMBL2363146	23	44	23	43	18	47	9	23	9	24	14	20
CHEMBL2363395	20	44	18	40	16	46	7	21	9	25	11	19
CHEMBL938648	35	9	63	9	80	12	54	6	26	6	9	3
CHEMBL1613980	13	66	8	71	17	77	6	41	11	36	2	30
CHEMBL2363581	24	37	24	40	24	41	12	22	12	19	12	18
CHEMBL3215132	63	11	68	9	69	8	37	3	32	5	31	6
CHEMBL1614267	49	19	52	25	57	22	30	14	27	8	22	11
CHEMBL2363277	32	32	29	30	31	34	14	16	17	18	15	14
CHEMBL3111192	7	64	5	40	10	94	4	35	6	59	1	5
CHEMBL3111198	20	51	11	34	25	79	8	31	17	48	3	3
CHEMBL2363153	39	24	40	16	41	22	21	7	20	15	19	9
CHEMBL2363197	14	50	17	46	15	52	9	24	6	28	8	22
CHEMBL2363371	22	40	18	39	20	39	8	19	12	20	10	20
CHEMBL2363734	30	28	28	28	24	36	11	18	13	18	17	10
CHEMBL1614478	77	13	80	9	67	10	35	3	32	7	45	6
CHEMBL2363336	22	37	23	37	23	42	12	21	11	21	11	16
CHEMBL3111195	18	53	14	31	24	80	10	29	14	51	4	2
CHEMBL2363278	35	32	36	28	39	28	20	12	19	16	16	16
CHEMBL2363351	37	24	34	22	37	22	17	10	20	12	17	12
CHEMBL2363391	29	39	27	36	28	41	13	19	15	22	14	17
CHEMBL2363326	37	38	32	32	35	38	15	16	20	22	17	16
CHEMBL2363328	20	48	18	45	22	57	10	27	12	30	8	18
CHEMBL2363330	34	25	34	25	36	22	18	11	18	11	16	14
CHEMBL2363364	22	47	19	51	19	54	8	29	11	25	11	22
CHEMBL2363333	32	38	30	28	32	32	15	11	17	21	15	17
CHEMBL2363148	23	45	20	44	21	45	9	22	12	23	11	22
CHEMBL2363264	26	39	26	39	28	36	14	18	14	18	12	21
CHEMBL2363283	32	26	33	20	31	28	16	11	15	17	17	9
CHEMBL2363660	33	37	30	32	33	41	15	18	18	23	15	14
CHEMBL2363307	28	32	23	29	27	35	11	16	16	19	12	13
CHEMBL2363247	28	36	24	36	26	36	11	18	15	18	13	18
CHEMBL2363465	22	48	19	43	21	51	9	23	12	28	10	20
CHEMBL2363225	26	40	23	40	23	42	10	21	13	21	13	19
CHEMBL2363468	24	43	21	44	23	49	10	25	13	24	11	19
CHEMBL2114826	42	40	47	51	35	37	20	24	15	13	27	27
CHEMBL3215266	56	6	86	8	76	8	53	5	23	3	33	3
CHEMBL2363731	22	44	22	45	22	51	11	26	11	25	11	19
CHEMBL1614479	48	7	76	3	70	8	49	2	21	6	27	1
CHEMBL3214782	67	7	70	16	65	17	34	13	31	4	36	3
CHEMBL1614273	43	46	36	37	43	49	18	20	25	29	18	17
CHEMBL1794400	49	34	51	22	52	28	27	8	25	20	24	14
CHEMBL2363728	40	34	33	29	41	33	17	14	24	19	16	15
CHEMBL2363568	24	35	26	32	28	35	15	16	13	19	11	16
CHEMBL2363353	28	43	26	36	28	41	13	17	15	24	13	19
CHEMBL2363230	47	19	43	17	48	18	22	8	26	10	21	9
CHEMBL1670561	84	17	75	8	43	11	17	1	26	10	58	7
CHEMBL1614518	36	38	45	30	45	38	27	15	18	23	18	15
CHEMBL2363739	37	20	37	24	38	22	19	13	19	9	18	11
CHEMBL2363558	43	26	45	20	46	26	24	10	22	16	21	10
CHEMBL2363322	23	49	21	44	22	49	10	22	12	27	11	22
CHEMBL2363753	34	33	34	28	36	33	18	14	18	19	16	14
CHEMBL2363348	21	43	24	39	19	44	11	20	8	24	13	19
CHEMBL1614321	33	54	30	48	39	52	18	23	21	29	12	25
CHEMBL2363337	25	44	19	45	24	49	9	25	15	24	10	20
CHEMBL2363228	26	29	27	27	27	28	14	13	13	15	13	14
CHEMBL2363504	28	42	25	36	29	44	13	19	16	25	12	17
CHEMBL2363664	30	42	26	37	26	47	11	21	15	26	15	16
CHEMBL2363269	33	36	27	39	28	47	11	25	17	22	16	14
CHEMBL1613893	16	44	25	70	23	72	16	49	7	23	9	21
CHEMBL1614345	52	34	40	29	52	31	20	13	32	18	20	16
CHEMBL2363442	24	37	20	37	22	38	9	19	13	19	11	18
CHEMBL2363317	32	35	29	33	29	40	13	19	16	21	16	14
CHEMBL2363432	40	28	37	27	43	25	20	12	23	13	17	15
CHEMBL1614376	86	3	63	3	87	4	32	2	55	2	31	1
CHEMBL2363403	31	36	27	34	32	40	14	19	18	21	13	15
CHEMBL1614355	37	2	51	2	52	2	33	1	19	1	18	1
CHEMBL2363593	41	20	35	22	42	20	18	11	24	9	17	11
CHEMBL2363414	36	29	35	23	39	28	19	11	20	17	16	12
CHEMBL1614226	19	68	12	57	15	73	4	31	11	42	8	26
CHEMBL2363444	49	17	48	15	55	16	27	7	28	9	21	8
CHEMBL1738246	84	14	51	13	77	9	22	4	55	5	29	9
CHEMBL2363697	34	22	39	20	35	24	20	11	15	13	19	9
CHEMBL2363725	38	31	36	32	38	33	18	17	20	16	18	15
CHEMBL2363572	27	48	24	46	25	58	11	28	14	30	13	18
CHEMBL2363189	39	27	37	28	40	31	19	16	21	15	18	12
CHEMBL2363799	27	36	28	33	25	41	13	19	12	22	15	14
CHEMBL2363628	13	62	14	55	15	65	8	29	7	36	6	26
CHEMBL2363489	25	39	22	32	23	41	10	17	13	24	12	15
CHEMBL2363426	29	29	27	29	30	30	14	15	16	15	13	14
CHEMBL1738575	35	52	31	71	24	49	10	34	14	15	21	37
CHEMBL2363836	31	38	24	39	29	39	11	20	18	19	13	19
CHEMBL2363789	30	36	35	30	33	40	19	17	14	23	16	13
CHEMBL2363553	32	29	33	30	37	33	19	17	18	16	14	13
CHEMBL2363332	35	33	32	37	35	38	16	21	19	17	16	16
CHEMBL1614308	44	42	33	39	43	43	16	20	27	23	17	19
CHEMBL2363809	26	47	21	42	25	47	10	21	15	26	11	21
CHEMBL2363207	25	43	24	45	19	52	9	27	10	25	15	18
CHEMBL2114827	7	86	5	78	4	78	1	35	3	43	4	43
CHEMBL1964046	46	35	51	31	61	24	33	10	28	14	18	21
CHEMBL1614462	31	60	31	57	26	49	13	23	13	26	18	34
CHEMBL2363671	25	37	27	31	22	44	12	19	10	25	15	12
CHEMBL2363290	27	41	21	45	24	48	9	26	15	22	12	19
CHEMBL2363459	40	34	34	36	38	34	16	18	22	16	18	18
CHEMBL2363611	20	49	18	49	22	56	10	28	12	28	8	21
CHEMBL2363743	30	42	32	34	30	40	16	16	14	24	16	18
CHEMBL1613821	74	11	64	11	62	10	26	5	36	5	38	6
CHEMBL2363341	22	49	20	46	20	55	9	26	11	29	11	20
CHEMBL1614465	44	16	78	17	78	17	56	9	22	8	22	8
CHEMBL1614083	6	73	5	74	3	91	1	46	2	45	4	28
CHEMBL2363366	42	26	44	22	46	20	24	8	22	12	20	14
CHEMBL2363766	44	26	45	18	47	22	24	7	23	15	21	11
CHEMBL2363464	24	44	19	42	21	48	8	23	13	25	11	19
CHEMBL1963899	59	22	63	19	66	19	35	8	31	11	28	11
CHEMBL3214801	65	26	57	23	64	25	28	11	36	14	29	12
CHEMBL1614512	34	48	29	59	33	55	14	33	19	22	15	26
CHEMBL648337	71	27	47	10	54	23	15	3	39	20	32	7
CHEMBL2363213	21	41	20	39	21	50	10	24	11	26	10	15
CHEMBL2363556	34	32	30	36	30	36	13	20	17	16	17	16
CHEMBL2363142	25	39	26	37	27	42	14	20	13	22	12	17
CHEMBL2363788	28	37	33	31	29	36	17	15	12	21	16	16
CHEMBL2363560	29	37	26	36	31	39	14	19	17	20	12	17
CHEMBL2155446	77	5	83	5	66	4	36	2	30	2	47	3
CHEMBL2363790	39	24	35	30	36	26	16	16	20	10	19	14
CHEMBL2363481	21	45	18	44	19	51	8	25	11	26	10	19
CHEMBL2114715	40	57	30	49	34	52	12	22	22	30	18	27
CHEMBL2363433	31	36	31	35	32	41	16	20	16	21	15	15
CHEMBL2363609	31	33	25	33	30	34	12	17	18	17	13	16
CHEMBL3214965	29	55	35	59	30	40	18	22	12	18	17	37
CHEMBL1169087	15	53	21	52	12	63	9	31	3	32	12	21
CHEMBL3214907	43	41	50	40	45	47	26	23	19	24	24	17
CHEMBL687330	11	11	25	36	34	31	24	28	10	3	1	8
CHEMBL1614008	46	33	52	29	56	34	31	15	25	19	21	14
CHEMBL2363324	21	46	21	43	22	43	11	20	11	23	10	23
CHEMBL2363185	35	34	31	33	38	33	17	16	21	17	14	17
CHEMBL2363220	34	36	32	38	32	42	15	22	17	20	17	16
CHEMBL2363555	25	46	22	46	25	46	11	23	14	23	11	23
CHEMBL2363437	35	26	30	27	37	29	16	15	21	14	14	12
CHEMBL2363243	34	31	33	32	33	37	16	19	17	18	17	13
CHEMBL2363612	37	20	37	22	40	20	20	11	20	9	17	11
CHEMBL2363140	24	54	24	44	24	60	12	25	12	35	12	19
CHEMBL3215216	77	14	69	17	78	11	35	7	43	4	34	10
CHEMBL2363239	31	34	30	30	29	40	14	18	15	22	16	12
CHEMBL2363434	22	41	19	42	23	41	10	21	13	20	9	21
CHEMBL2114717	33	57	21	60	24	59	6	31	18	28	15	29
CHEMBL2363688	15	58	16	55	13	61	7	29	6	32	9	26
CHEMBL2363152	35	20	32	26	33	26	15	16	18	10	17	10
CHEMBL1738040	24	76	24	62	22	56	11	21	11	35	13	41
CHEMBL2363141	17	52	19	49	14	59	8	28	6	31	11	21
CHEMBL2363803	36	36	33	31	33	37	15	16	18	21	18	15
CHEMBL2363623	26	45	23	41	23	48	10	22	13	26	13	19
CHEMBL2363211	24	33	25	36	25	45	13	24	12	21	12	12
CHEMBL2363594	18	45	15	39	15	50	6	22	9	28	9	17
CHEMBL2363236	21	48	23	48	22	54	12	27	10	27	11	21
CHEMBL2363549	17	47	14	42	19	49	8	22	11	27	6	20
CHEMBL2363387	22	52	20	50	24	56	11	27	13	29	9	23
CHEMBL2363180	18	57	23	48	21	59	13	25	8	34	10	23
CHEMBL2363577	28	29	26	29	26	38	12	19	14	19	14	10
CHEMBL2363252	35	31	32	26	33	29	15	12	18	17	17	14
CHEMBL2363630	30	33	33	29	33	34	18	15	15	19	15	14
CHEMBL2363216	37	30	35	28	36	36	17	17	19	19	18	11
CHEMBL2363535	33	35	27	35	28	38	11	19	17	19	16	16
CHEMBL2363368	37	25	39	21	40	28	21	12	19	16	18	9
CHEMBL2363618	33	28	29	30	34	30	15	16	19	14	14	14
CHEMBL2363774	18	51	15	52	15	57	6	29	9	28	9	23
CHEMBL1614503	49	36	53	36	58	36	31	18	27	18	22	18
CHEMBL2363389	32	38	33	36	31	44	16	21	15	23	17	15
CHEMBL2363477	26	45	27	37	23	44	12	18	11	26	15	19
CHEMBL2363834	23	43	24	40	23	45	12	21	11	24	12	19
CHEMBL1794367	45	34	53	37	48	37	28	20	20	17	25	17
CHEMBL2363440	25	39	29	36	26	45	15	21	11	24	14	15
CHEMBL2363363	35	34	32	30	35	34	16	15	19	19	16	15
CHEMBL2363369	40	27	34	30	30	35	12	19	18	16	22	11
CHEMBL2363435	27	39	23	37	26	42	11	20	15	22	12	17
CHEMBL2363223	26	38	23	30	27	34	12	13	15	21	11	17
CHEMBL2363851	28	32	21	32	25	36	9	18	16	18	12	14
CHEMBL2363575	36	33	34	29	36	34	17	15	19	19	17	14
CHEMBL2363443	19	57	19	48	24	57	12	24	12	33	7	24
CHEMBL2363273	26	45	21	42	17	51	6	24	11	27	15	18
CHEMBL2363655	34	41	24	35	36	42	13	18	23	24	11	17
CHEMBL2363242	34	30	31	28	33	38	15	18	18	20	16	10
CHEMBL2363367	22	50	21	45	21	51	10	23	11	28	11	22
CHEMBL2363561	40	19	39	19	39	22	19	11	20	11	20	8
CHEMBL2363771	26	42	27	38	29	44	15	20	14	24	12	18
CHEMBL2363238	33	36	32	34	35	38	17	18	18	20	15	16
CHEMBL1613904	36	43	45	44	47	45	28	23	19	22	17	21
CHEMBL2363507	27	43	23	41	22	50	9	24	13	26	14	17
CHEMBL2363727	33	34	31	31	26	35	12	16	14	19	19	15
CHEMBL2363480	33	34	30	30	29	36	13	16	16	20	17	14
CHEMBL2363187	28	39	24	39	24	46	10	23	14	23	14	16
CHEMBL2363659	30	32	27	35	29	33	13	18	16	15	14	17
CHEMBL2363327	29	38	26	31	27	41	12	17	15	24	14	14
CHEMBL2363154	6	72	10	63	8	73	6	32	2	41	4	31
CHEMBL2363469	33	33	29	33	32	38	14	19	18	19	15	14
CHEMBL2363275	31	37	30	38	31	43	15	22	16	21	15	16
CHEMBL2363248	27	39	31	31	30	40	17	16	13	24	14	15
CHEMBL2363374	29	40	29	37	32	45	16	21	16	24	13	16
CHEMBL2363397	36	31	38	24	38	29	20	11	18	18	18	13
CHEMBL2363811	19	49	17	46	18	55	8	26	10	29	9	20
CHEMBL2363208	42	30	39	19	45	29	21	9	24	20	18	10
CHEMBL2363212	36	33	38	33	34	36	18	18	16	18	20	15
CHEMBL2363373	25	41	26	40	25	47	13	23	12	24	13	17
CHEMBL2363657	40	26	35	24	37	24	16	11	21	13	19	13
CHEMBL2363160	21	44	20	43	21	49	10	24	11	25	10	19
CHEMBL2363846	24	39	21	41	21	48	9	25	12	23	12	16
CHEMBL3215276	76	4	86	8	86	8	48	6	38	2	38	2
CHEMBL2363740	23	51	19	46	20	49	8	22	12	27	11	24
CHEMBL2363218	34	32	37	29	35	37	19	17	16	20	18	12
CHEMBL2363224	39	29	37	26	38	31	18	14	20	17	19	12
CHEMBL2363529	21	51	19	46	20	55	9	25	11	30	10	21
CHEMBL2363713	44	21	41	16	45	21	21	8	24	13	20	8
CHEMBL2363820	37	33	36	29	37	36	18	16	19	20	18	13
CHEMBL2363314	23	44	23	44	24	46	12	23	12	23	11	21
CHEMBL2363635	16	56	16	55	14	57	7	28	7	29	9	27
CHEMBL2363352	28	38	25	36	29	48	13	23	16	25	12	13
CHEMBL2363631	27	33	31	31	28	38	16	18	12	20	15	13
CHEMBL2363221	22	51	18	44	20	59	8	26	12	33	10	18
CHEMBL2363178	19	43	21	44	18	51	10	26	8	25	11	18
CHEMBL2363546	32	38	30	35	34	39	16	18	18	21	14	17
CHEMBL2363343	21	47	21	44	22	49	11	23	11	26	10	21
CHEMBL2363210	36	34	31	33	37	37	16	18	21	19	15	15
CHEMBL2363452	27	42	26	38	25	42	12	19	13	23	14	19
CHEMBL2363171	17	47	17	50	16	51	8	27	8	24	9	23
CHEMBL2363445	27	35	30	31	31	36	17	16	14	20	13	15
CHEMBL2363319	22	53	21	49	25	58	12	27	13	31	9	22
CHEMBL2363559	29	36	29	36	26	36	13	18	13	18	16	18
CHEMBL2363796	27	38	28	35	25	37	13	17	12	20	15	18
CHEMBL2363214	31	33	33	30	32	35	17	16	15	19	16	14
CHEMBL2363377	34	29	38	26	38	35	21	16	17	19	17	10
CHEMBL2363370	26	46	29	40	27	46	15	20	12	26	14	20
CHEMBL2363454	28	39	29	37	27	40	14	19	13	21	15	18
CHEMBL1614231	33	36	46	34	43	38	28	18	15	20	18	16
CHEMBL2363425	27	39	26	36	29	41	14	19	15	22	12	17
CHEMBL2363831	19	44	20	43	19	49	10	24	9	25	10	19
CHEMBL1614216	50	55	58	55	66	54	37	27	29	27	21	28
CHEMBL2363644	17	51	15	46	16	53	7	24	9	29	8	22
CHEMBL2363166	24	50	31	44	29	46	18	20	11	26	13	24
CHEMBL2363446	27	37	30	33	31	36	17	16	14	20	13	17
CHEMBL2363470	17	59	18	51	15	62	8	27	7	35	10	24
CHEMBL1613814	49	59	43	51	52	58	23	25	29	33	20	26
CHEMBL2363645	25	45	26	39	27	50	14	22	13	28	12	17
CHEMBL1738021	83	8	80	11	83	11	40	7	43	4	40	4
CHEMBL2363516	22	49	22	45	22	54	11	25	11	29	11	20
CHEMBL1614147	40	4	58	5	68	5	43	3	25	2	15	2
CHEMBL2363492	10	65	13	55	9	66	6	28	3	38	7	27
CHEMBL2363696	26	39	31	33	29	36	17	15	12	21	14	18
CHEMBL1614486	43	37	53	29	54	36	32	14	22	22	21	15
CHEMBL2363847	23	49	23	44	22	57	11	26	11	31	12	18
CHEMBL2363719	39	27	38	25	41	30	20	14	21	16	18	11
CHEMBL2363634	35	37	35	34	40	35	20	16	20	19	15	18
CHEMBL2363569	34	35	30	35	34	38	15	19	19	19	15	16
CHEMBL2363294	36	32	35	29	39	33	19	15	20	18	16	14
CHEMBL2363616	31	39	31	37	34	42	17	20	17	22	14	17
CHEMBL2363601	36	36	36	31	40	39	20	17	20	22	16	14
CHEMBL2363514	17	53	18	51	17	52	9	25	8	27	9	26
CHEMBL2363748	22	47	23	38	19	45	10	18	9	27	13	20
CHEMBL2363747	42	29	41	29	43	32	21	16	22	16	20	13
CHEMBL2363457	28	39	29	37	29	44	15	21	14	23	14	16
CHEMBL1613949	43	68	42	56	41	66	20	27	21	39	22	29
CHEMBL2363767	28	34	28	32	28	40	14	19	14	21	14	13
CHEMBL2363793	21	43	23	37	24	46	13	20	11	26	10	17
CHEMBL2363692	31	41	34	34	37	43	20	18	17	25	14	16
CHEMBL2363639	33	40	32	34	33	40	16	17	17	23	16	17
CHEMBL2363421	11	62	13	54	12	70	7	31	5	39	6	23
CHEMBL2363313	28	35	29	27	29	40	15	16	14	24	14	11
CHEMBL2363798	23	45	23	39	20	50	10	22	10	28	13	17
CHEMBL2363272	33	39	26	35	31	44	12	20	19	24	14	15
CHEMBL2363447	28	48	27	43	27	47	13	21	14	26	14	22
CHEMBL2363749	33	31	33	28	34	35	17	16	17	19	16	12
CHEMBL1738438	86	2	98	3	98	3	55	2	43	1	43	1
CHEMBL2114847	96	14	92	12	86	18	41	8	45	10	51	4
CHEMBL2363388	24	42	25	36	23	44	12	19	11	25	13	17
CHEMBL1614035	25	75	23	66	16	75	7	33	9	42	16	33
CHEMBL2363830	23	48	23	39	24	47	12	19	12	28	11	20
CHEMBL2363255	16	48	19	43	17	51	10	23	7	28	9	20
CHEMBL2363562	34	33	34	32	38	33	19	16	19	17	15	16
CHEMBL2363335	24	42	25	39	25	45	13	21	12	24	12	18
CHEMBL2363338	33	36	37	29	40	37	22	15	18	22	15	14
CHEMBL1614395	125	18	128	13	123	17	63	6	60	11	65	7
CHEMBL2363334	35	36	39	36	42	36	23	18	19	18	16	18
CHEMBL1614007	67	11	70	10	71	11	37	5	34	6	33	5
CHEMBL1614049	58	47	70	36	70	47	41	18	29	29	29	18
CHEMBL1034535	13	31	39	34	46	19	36	11	10	8	3	23
CHEMBL1613853	43	38	52	33	55	37	32	16	23	21	20	17
CHEMBL1614138	30	70	30	67	32	57	16	27	16	30	14	40
CHEMBL2363814	21	43	24	39	25	42	14	19	11	23	10	20
CHEMBL2363245	27	39	25	40	24	39	11	20	13	19	14	20
CHEMBL2363349	39	25	39	28	42	29	21	16	21	13	18	12
CHEMBL2363794	27	46	22	42	21	48	8	22	13	26	14	20
CHEMBL856174	83	2	57	2	100	2	37	1	63	1	20	1
CHEMBL1964005	115	6	97	7	96	9	39	5	57	4	58	2
CHEMBL1963983	24	70	25	74	19	76	10	40	9	36	15	34
CHEMBL2363215	30	35	31	34	27	43	14	21	13	22	17	13
CHEMBL1613890	50	36	59	27	63	29	36	10	27	19	23	17
CHEMBL1614363	56	58	48	45	28	47	10	17	18	30	38	28
CHEMBL1022010	64	4	77	6	75	6	44	4	31	2	33	2
CHEMBL1613962	81	26	42	9	83	31	22	7	61	24	20	2
CHEMBL1614244	49	38	66	36	55	34	36	16	19	18	30	20
CHEMBL2363764	23	51	19	53	18	60	7	31	11	29	12	22
CHEMBL1614405	21	20	18	18	13	16	5	7	8	9	13	11
CHEMBL1613926	72	35	35	16	83	31	23	6	60	25	12	10
CHEMBL1614492	50	42	63	36	63	42	38	18	25	24	25	18
CHEMBL2363716	33	33	31	32	30	35	14	17	16	18	17	15
CHEMBL1243972	39	7	95	8	102	11	79	6	23	5	16	2
CHEMBL1614053	52	44	60	41	64	45	36	21	28	24	24	20
CHEMBL829401	81	12	75	8	82	8	38	2	44	6	37	6
CHEMBL2363167	20	48	25	40	19	50	12	21	7	29	13	19
CHEMBL2363592	35	42	39	32	38	46	21	18	17	28	18	14
CHEMBL2363599	25	53	26	45	27	54	14	23	13	31	12	22
CHEMBL1613942	44	41	58	34	62	41	38	17	24	24	20	17
CHEMBL1614463	42	47	46	34	40	45	22	16	18	29	24	18
CHEMBL1614132	60	47	63	46	67	45	35	22	32	23	28	24
CHEMBL2363633	27	36	31	34	26	44	15	21	11	23	16	13
CHEMBL1963934	101	2	120	5	97	5	58	4	39	1	62	1
CHEMBL2363557	30	40	29	41	25	49	12	25	13	24	17	16
CHEMBL1614283	43	38	31	38	40	52	14	26	26	26	17	12
CHEMBL1614548	92	16	80	14	84	26	36	12	48	14	44	2
CHEMBL2363458	22	48	26	46	26	48	15	23	11	25	11	23
CHEMBL2354217	91	23	93	20	92	29	47	13	45	16	46	7
CHEMBL1738633	95	5	97	4	92	3	47	1	45	2	50	3
CHEMBL1613950	50	43	60	42	62	45	36	22	26	23	24	20
CHEMBL2114928	17	104	13	91	16	89	6	38	10	51	7	53
CHEMBL2363385	33	35	33	33	32	40	16	19	16	21	17	14
CHEMBL1614066	6	109	7	80	3	99	2	35	1	64	5	45
CHEMBL1614109	46	69	35	52	41	61	15	22	26	39	20	30
CHEMBL1737868	29	92	17	83	24	95	6	43	18	52	11	40
CHEMBL1614477	49	44	57	37	56	45	32	19	24	26	25	18
CHEMBL1794460	119	46	115	49	100	39	48	21	52	18	67	28
CHEMBL1614197	89	3	76	6	87	5	37	4	50	1	39	2
CHEMBL2354228	32	46	49	76	57	84	37	57	20	27	12	19
CHEMBL1737978	90	24	86	17	94	19	45	6	49	13	41	11
CHEMBL2363383	20	49	20	45	18	54	9	25	9	29	11	20
CHEMBL2363656	16	51	19	49	19	54	11	26	8	28	8	23
CHEMBL1614225	26	43	32	56	38	61	22	37	16	24	10	19
CHEMBL1738400	24	76	23	66	15	76	7	33	8	43	16	33
CHEMBL1738679	34	78	38	56	34	54	19	16	15	38	19	40
CHEMBL1738043	69	61	52	47	59	48	21	17	38	31	31	30
CHEMBL1738202	93	4	84	3	101	3	46	1	55	2	38	2
CHEMBL1614550	100	11	103	10	109	11	56	5	53	6	47	5
CHEMBL2363390	24	48	25	41	25	53	13	23	12	30	12	18
CHEMBL1737977	83	13	73	11	80	14	35	6	45	8	38	5
CHEMBL2114823	95	27	94	22	91	25	45	10	46	15	49	12
CHEMBL1243978	29	14	68	24	75	26	57	18	18	8	11	6
CHEMBL2363839	34	36	34	34	40	38	20	18	20	20	14	16
CHEMBL1243969	31	9	74	19	85	20	64	15	21	5	10	4
CHEMBL3215034	63	43	59	43	62	36	29	18	33	18	30	25
CHEMBL914418	42	10	79	13	107	17	72	10	35	7	7	3
CHEMBL1738197	77	53	65	34	70	37	29	9	41	28	36	25
CHEMBL698689	26	3	88	5	88	6	75	4	13	2	13	1
CHEMBL2363707	30	30	28	34	28	38	13	21	15	17	15	13
CHEMBL2363795	37	32	38	30	39	34	20	16	19	18	18	14
CHEMBL3215176	8	100	9	90	9	98	5	44	4	54	4	46
CHEMBL1614329	51	42	57	35	64	41	35	17	29	24	22	18
CHEMBL1676103	56	41	53	32	51	33	24	12	27	21	29	20
CHEMBL3214997	92	38	91	34	105	36	52	16	53	20	39	18
CHEMBL2363695	38	32	37	33	39	35	19	18	20	17	18	15
CHEMBL1794393	34	89	46	75	42	90	27	38	15	52	19	37
CHEMBL1243975	20	15	41	46	45	51	33	41	12	10	8	5
CHEMBL830839	104	4	106	4	106	2	54	1	52	1	52	3
CHEMBL2363315	25	47	26	41	27	50	14	22	13	28	12	19
CHEMBL1614117	68	9	55	11	51	14	19	8	32	6	36	3
CHEMBL1737951	76	79	56	52	52	67	16	20	36	47	40	32
CHEMBL1614065	100	12	108	11	108	11	58	5	50	6	50	6
CHEMBL1614393	48	48	64	48	64	48	40	24	24	24	24	24
CHEMBL1613907	69	6	72	5	107	3	55	1	52	2	17	4
CHEMBL1964010	38	111	26	103	38	110	13	51	25	59	13	52
CHEMBL2098499	26	64	23	73	21	67	9	38	12	29	14	35
CHEMBL1963940	64	38	62	26	66	36	32	12	34	24	30	14
CHEMBL2363737	40	30	40	26	40	34	20	15	20	19	20	11
CHEMBL641707	6	46	29	16	25	46	24	8	1	38	5	8
CHEMBL653167	85	12	58	8	67	8	20	2	47	6	38	6
CHEMBL2303649	10	22	9	22	11	20	5	10	6	10	4	12
CHEMBL830842	81	12	75	8	82	8	38	2	44	6	37	6
CHEMBL1963930	117	4	99	5	102	3	42	2	60	1	57	3
CHEMBL3215006	41	106	44	111	33	105	18	55	15	50	26	56
CHEMBL1614215	45	65	55	46	54	61	32	21	22	40	23	25
CHEMBL1963813	20	108	33	105	29	99	21	48	8	51	12	57
CHEMBL2114839	121	43	94	43	123	50	48	25	75	25	46	18
CHEMBL1738362	74	17	66	20	80	23	36	13	44	10	30	7
CHEMBL2114742	82	40	73	43	79	37	35	20	44	17	38	23
CHEMBL1613897	85	91	96	73	105	86	58	34	47	52	38	39
CHEMBL1614092	49	57	59	44	60	51	35	19	25	32	24	25
CHEMBL2354305	99	15	99	14	100	21	50	10	50	11	49	4
CHEMBL1738319	54	90	61	82	63	86	35	39	28	47	26	43
CHEMBL1034533	45	10	70	15	57	11	41	8	16	3	29	7
CHEMBL2363573	34	41	31	36	37	35	17	15	20	20	14	21
CHEMBL1243970	59	8	137	8	154	10	116	5	38	5	21	3
CHEMBL1738080	26	74	24	65	16	75	7	33	9	42	17	32
CHEMBL3214958	39	91	34	75	43	96	19	40	24	56	15	35
CHEMBL1613871	110	6	110	9	116	7	58	5	58	2	52	4
CHEMBL2114863	64	34	71	31	67	37	37	17	30	20	34	14
CHEMBL1614509	27	114	35	103	24	115	16	52	8	63	19	51
CHEMBL1613785	64	63	75	55	87	54	49	23	38	31	26	32
CHEMBL1738430	100	34	76	24	98	36	37	13	61	23	39	11
CHEMBL1243977	29	10	58	29	63	29	46	24	17	5	12	5
CHEMBL1738019	85	28	79	19	84	35	39	13	45	22	40	6
CHEMBL1738091	16	140	13	133	15	113	6	53	9	60	7	80
CHEMBL1614309	97	39	77	31	98	34	39	13	59	21	38	18
CHEMBL1963968	57	64	49	55	54	51	23	21	31	30	26	34
CHEMBL1243968	50	11	111	16	121	23	91	14	30	9	20	2
CHEMBL1963898	33	113	36	90	29	101	16	39	13	62	20	51
CHEMBL1614319	30	92	34	83	34	79	19	35	15	44	15	48
CHEMBL1738602	72	62	72	43	60	47	30	14	30	33	42	29
CHEMBL681296	117	5	117	3	4	6	2	2	2	4	115	1
CHEMBL3214794	49	113	53	96	58	83	31	33	27	50	22	63
CHEMBL2114844	110	53	80	47	112	46	41	20	71	26	39	27
CHEMBL1794484	82	65	83	73	85	66	43	37	42	29	40	36
CHEMBL1614295	77	2	74	2	105	2	51	1	54	1	23	1
CHEMBL1738422	136	7	119	4	147	7	65	2	82	5	54	2
CHEMBL1614072	36	46	52	45	50	49	33	24	17	25	19	21
CHEMBL1737979	109	12	106	10	111	10	54	4	57	6	52	6
CHEMBL918058	6	117	11	143	13	160	9	93	4	67	2	50
CHEMBL1794497	119	11	99	10	128	11	54	5	74	6	45	5
CHEMBL2114727	135	27	134	25	113	26	56	12	57	14	78	13
CHEMBL1614272	50	91	38	77	36	92	12	39	24	53	26	38
CHEMBL2378059	61	2	113	3	100	3	76	2	24	1	37	1
CHEMBL1737863	82	54	86	53	78	33	41	16	37	17	45	37
CHEMBL1794445	22	127	18	132	14	131	5	68	9	63	13	64
CHEMBL1614131	3	256	10	235	9	257	8	118	1	139	2	117
CHEMBL1614480	18	124	24	115	18	121	12	56	6	65	12	59
CHEMBL1243965	41	11	102	19	109	22	85	15	24	7	17	4
CHEMBL1614097	56	62	66	53	72	57	41	24	31	33	25	29
CHEMBL1243976	34	14	79	33	83	33	64	26	19	7	15	7
CHEMBL1963907	56	100	48	95	60	101	26	48	34	53	22	47
CHEMBL1794570	10	139	10	140	12	133	6	67	6	66	4	73
CHEMBL1963867	43	103	37	89	28	102	11	44	17	58	26	45
CHEMBL1614356	53	54	64	45	67	45	39	18	28	27	25	27
CHEMBL3215158	89	9	77	15	84	12	36	9	48	3	41	6
CHEMBL1794457	11	137	10	147	11	140	5	75	6	65	5	72
CHEMBL1613813	60	56	66	55	76	49	41	24	35	25	25	31
CHEMBL2114797	90	61	90	59	78	70	39	34	39	36	51	25
CHEMBL2354207	89	13	116	26	145	25	86	19	59	6	30	7
CHEMBL1738097	28	95	34	93	34	64	20	31	14	33	14	62
CHEMBL1963915	125	24	147	21	102	21	62	9	40	12	85	12
CHEMBL1613955	67	74	58	70	57	70	24	33	33	37	34	37
CHEMBL1614484	143	18	134	10	147	14	69	3	78	11	65	7
CHEMBL1963910	131	9	103	16	124	17	48	12	76	5	55	4
CHEMBL1613861	137	24	126	20	139	24	64	10	75	14	62	10
CHEMBL1613967	50	48	61	44	63	48	37	22	26	26	24	22
CHEMBL3215154	73	62	68	57	79	57	37	26	42	31	31	31
CHEMBL1794581	106	24	125	34	137	32	78	21	59	11	47	13
CHEMBL2449559	70	14	143	34	177	34	125	27	52	7	18	7
CHEMBL1614425	69	45	62	44	79	41	36	20	43	21	26	24
CHEMBL1794438	98	67	101	63	81	58	42	27	39	31	59	36
CHEMBL2114820	99	25	147	23	144	28	96	13	48	15	51	10
CHEMBL1613947	52	49	59	52	65	49	36	26	29	23	23	26
CHEMBL1613876	52	67	57	61	59	72	32	33	27	39	25	28
CHEMBL1614259	68	28	55	29	53	29	20	15	33	14	35	14
CHEMBL1963933	11	166	10	167	7	99	3	50	4	49	7	117
CHEMBL3214959	110	50	117	51	101	47	54	24	47	23	63	27
CHEMBL2114752	103	21	146	24	147	25	95	14	52	11	51	10
CHEMBL1614516	5	131	4	104	3	129	1	51	2	78	3	53
CHEMBL2354303	13	115	18	117	23	122	14	62	9	60	4	55
CHEMBL3214816	115	39	102	38	129	41	58	20	71	21	44	18
CHEMBL1614287	18	97	12	75	14	88	4	33	10	55	8	42
CHEMBL1614362	67	21	57	13	70	12	30	2	40	10	27	11
CHEMBL1614388	67	82	51	75	66	79	25	36	41	43	26	39
CHEMBL1614255	53	82	42	71	53	81	21	35	32	46	21	36
CHEMBL2354248	5	163	4	123	7	162	3	61	4	101	1	62
CHEMBL3215078	87	72	88	63	103	65	52	28	51	37	36	35
CHEMBL3214985	34	109	39	104	37	107	21	51	16	56	18	53
CHEMBL1738599	107	23	90	9	85	22	34	4	51	18	56	5
CHEMBL1963698	61	173	54	155	45	142	19	62	26	80	35	93
CHEMBL1794452	7	141	8	149	11	140	6	74	5	66	2	75
CHEMBL1794296	98	67	95	69	69	70	33	36	36	34	62	33
CHEMBL1737910	90	68	65	63	73	61	24	28	49	33	41	35
CHEMBL2354227	121	37	117	32	130	33	63	14	67	19	54	18
CHEMBL2114930	112	5	113	4	101	7	51	3	50	4	62	1
CHEMBL1963974	21	128	9	120	20	128	4	60	16	68	5	60
CHEMBL1738371	33	144	29	125	26	131	11	56	15	75	18	69
CHEMBL1794548	20	129	16	134	14	131	5	68	9	63	11	66
CHEMBL1738418	56	121	49	105	47	110	20	47	27	63	29	58
CHEMBL1614218	70	24	84	26	96	22	55	12	41	10	29	14
CHEMBL1963969	123	47	110	32	123	45	55	15	68	30	55	17
CHEMBL1243967	53	9	128	10	137	17	106	9	31	8	22	1
CHEMBL1614528	51	44	66	36	65	46	40	19	25	27	26	17
CHEMBL1613981	59	86	64	76	63	104	34	47	29	57	30	29
CHEMBL2114814	97	75	66	66	111	83	40	37	71	46	26	29
CHEMBL1964112	24	155	22	150	22	175	10	85	12	90	12	65
CHEMBL1963846	24	131	25	119	17	126	9	57	8	69	16	62
CHEMBL1963744	64	226	89	226	97	190	61	95	36	95	28	131
CHEMBL2114728	143	20	116	11	145	13	59	2	86	11	57	9
CHEMBL1613817	18	106	22	127	26	137	15	79	11	58	7	48
CHEMBL1738325	5	133	5	136	4	163	2	83	2	80	3	53
CHEMBL1614311	66	77	59	52	35	57	14	16	21	41	45	36
CHEMBL3215116	21	147	27	133	32	136	19	61	13	75	8	72
CHEMBL2354276	51	139	35	112	36	121	10	47	26	74	25	65
CHEMBL1614320	183	84	190	69	169	77	88	31	81	46	102	38
CHEMBL1794566	138	7	135	12	131	7	64	6	67	1	71	6
CHEMBL1794508	9	151	5	144	12	163	4	78	8	85	1	66
CHEMBL1964111	65	185	58	163	53	138	23	58	30	80	35	105
CHEMBL1738497	48	114	74	104	64	120	45	55	19	65	29	49
CHEMBL1614515	70	23	126	35	132	22	94	17	38	5	32	18
CHEMBL1794356	191	32	158	26	195	30	81	12	114	18	77	14
CHEMBL3214930	32	125	32	114	34	133	17	61	17	72	15	53
CHEMBL1738025	143	67	129	75	104	50	45	29	59	21	84	46
CHEMBL2114771	58	104	53	84	61	118	28	49	33	69	25	35
CHEMBL1827362	69	20	45	18	66	24	21	11	45	13	24	7
CHEMBL1794578	90	82	94	80	98	88	51	43	47	45	43	37
CHEMBL1794358	11	138	11	139	4	141	2	71	2	70	9	68
CHEMBL3214812	106	56	99	50	97	44	45	19	52	25	54	31
CHEMBL1614514	27	137	29	146	30	139	16	74	14	65	13	72
CHEMBL1613898	28	98	24	69	30	85	13	28	17	57	11	41
CHEMBL2114857	131	114	80	102	127	122	38	55	89	67	42	47
CHEMBL1738164	38	153	42	141	34	156	19	72	15	84	23	69
CHEMBL3215228	16	147	18	141	22	152	12	73	10	79	6	68
CHEMBL2114811	116	9	103	13	117	16	52	10	65	6	51	3
CHEMBL1737942	126	83	106	97	82	72	31	43	51	29	75	54
CHEMBL3215220	9	116	20	190	19	190	15	132	4	58	5	58
CHEMBL2114899	34	204	26	194	24	204	8	97	16	107	18	97
CHEMBL2354206	8	141	12	142	8	145	6	73	2	72	6	69
CHEMBL1794355	188	12	182	11	206	9	100	4	106	5	82	7
CHEMBL3215092	62	98	73	95	65	83	38	40	27	43	35	55
CHEMBL2114830	101	23	135	35	136	36	85	24	51	12	50	11
CHEMBL1613864	193	8	158	10	161	10	63	6	98	4	95	4
CHEMBL2114764	63	61	108	62	95	77	70	39	25	38	38	23
CHEMBL3214851	31	137	39	121	44	124	26	54	18	70	13	67
CHEMBL1614290	164	5	152	8	150	9	69	6	81	3	83	2
CHEMBL1964106	97	140	84	121	83	103	35	42	48	61	49	79
CHEMBL1794522	65	107	78	96	77	109	45	49	32	60	33	47
CHEMBL1614344	50	114	60	115	54	115	32	58	22	57	28	57
CHEMBL1243966	23	32	67	39	76	49	60	28	16	21	7	11
CHEMBL1614105	214	12	199	16	201	12	93	8	108	4	106	8
CHEMBL1794573	185	21	177	20	164	21	78	10	86	11	99	10
CHEMBL1614167	133	28	126	20	135	28	64	10	71	18	62	10
CHEMBL1738632	32	179	28	177	18	136	7	67	11	69	21	110
CHEMBL1738079	155	6	153	6	138	6	68	3	70	3	85	3
CHEMBL2354292	39	140	35	102	36	146	16	54	20	92	19	48
CHEMBL1794567	223	23	226	30	247	21	125	14	122	7	101	16
CHEMBL2114874	118	44	96	41	130	49	54	23	76	26	42	18
CHEMBL2114829	151	46	146	47	137	53	66	27	71	26	80	20
CHEMBL1964115	129	118	134	89	121	87	63	29	58	58	71	60
CHEMBL1614403	19	182	26	142	19	152	13	56	6	96	13	86
CHEMBL1963777	81	158	74	129	73	117	33	44	40	73	41	85
CHEMBL1614310	28	31	22	26	30	29	12	12	18	17	10	14
CHEMBL1033994	89	57	82	56	75	65	34	32	41	33	48	24
CHEMBL3215187	293	30	251	21	286	21	122	6	164	15	129	15
CHEMBL1738482	160	14	142	8	154	16	68	5	86	11	74	3
CHEMBL1738512	185	6	177	4	210	8	101	3	109	5	76	1
CHEMBL1738253	197	15	184	17	175	12	81	7	94	5	103	10
CHEMBL1963806	135	111	139	82	120	83	62	27	58	56	77	55
CHEMBL1613787	55	112	46	115	53	117	22	60	31	57	24	55
CHEMBL1794320	7	166	4	149	5	151	1	67	4	84	3	82
CHEMBL1964023	40	130	40	102	46	122	23	47	23	75	17	55
CHEMBL1794571	107	125	101	109	106	128	50	56	56	72	51	53
CHEMBL1738670	203	20	169	15	202	23	84	9	118	14	85	6
CHEMBL1963838	40	130	38	104	38	130	18	52	20	78	20	52
CHEMBL1614034	135	4	119	4	116	2	50	1	66	1	69	3
CHEMBL1794365	189	19	178	12	207	13	98	3	109	10	80	9
CHEMBL1614001	5	238	2	216	5	232	1	105	4	127	1	111
CHEMBL1738579	113	30	106	34	113	34	53	19	60	15	53	15
CHEMBL1738407	50	321	44	285	60	308	27	136	33	172	17	149
CHEMBL2354256	281	22	229	21	218	19	83	9	135	10	146	12
CHEMBL1613941	58	28	62	28	58	30	31	15	27	15	31	13
CHEMBL2354274	179	11	141	6	148	9	55	2	93	7	86	4
CHEMBL1963776	30	168	19	161	23	185	6	89	17	96	13	72
CHEMBL1963778	99	119	94	94	91	91	43	33	48	58	51	61
CHEMBL1738642	112	62	99	51	111	59	49	24	62	35	50	27
CHEMBL1614434	53	207	53	231	52	204	26	114	26	90	27	117
CHEMBL1613762	255	7	242	6	221	5	104	2	117	3	138	4
CHEMBL2114761	57	188	31	151	58	191	16	77	42	114	15	74
CHEMBL1613991	125	19	118	20	109	23	51	12	58	11	67	8
CHEMBL1614328	85	91	96	73	105	86	58	34	47	52	38	39
CHEMBL1964117	88	156	80	132	66	122	29	49	37	73	51	83
CHEMBL1614104	176	16	180	17	192	13	98	7	94	6	82	10
CHEMBL1964103	103	132	101	104	102	90	50	31	52	59	51	73
CHEMBL2114791	165	3	155	3	172	4	81	2	91	2	74	1
CHEMBL3215171	3	160	4	155	3	171	2	83	1	88	2	72
CHEMBL1613874	61	113	59	102	60	131	29	60	31	71	30	42
CHEMBL2114719	56	199	54	187	54	176	26	82	28	94	28	105
CHEMBL1738485	187	39	187	37	158	38	79	18	79	20	108	19
CHEMBL1614288	61	173	66	147	61	176	33	75	28	101	33	72
CHEMBL2114748	74	98	46	86	82	112	27	50	55	62	19	36
CHEMBL1738610	129	93	125	87	104	80	50	37	54	43	75	50
CHEMBL3215128	128	24	137	26	151	18	80	10	71	8	57	16
CHEMBL1738611	316	8	237	7	323	5	122	2	201	3	115	5
CHEMBL1614247	132	97	105	93	127	100	50	48	77	52	55	45
CHEMBL1614314	13	214	10	184	11	210	4	90	7	120	6	94
CHEMBL3215185	20	249	18	216	24	243	11	105	13	138	7	111
CHEMBL1963799	144	111	137	96	121	103	57	44	64	59	80	52
CHEMBL1794475	75	97	81	93	78	108	42	52	36	56	39	41
CHEMBL1614549	42	220	25	178	47	212	15	85	32	127	10	93
CHEMBL1738171	35	191	30	194	29	167	12	85	17	82	18	109
CHEMBL1794387	59	113	64	110	63	123	34	60	29	63	30	50
CHEMBL1794516	241	10	221	6	262	8	121	2	141	6	100	4
CHEMBL1614091	133	3	105	7	150	8	61	6	89	2	44	1
CHEMBL1963937	110	73	105	63	119	80	57	35	62	45	48	28
CHEMBL1614385	12	222	14	199	20	217	11	97	9	120	3	102
CHEMBL1963692	110	138	99	115	101	107	45	42	56	65	54	73
CHEMBL1614086	72	4	51	5	67	3	23	2	44	1	28	3
CHEMBL1963831	119	156	120	129	131	125	66	49	65	76	54	80
CHEMBL1614016	178	23	145	23	151	20	59	10	92	10	86	13
CHEMBL1963758	38	229	50	219	48	196	30	93	18	103	20	126
CHEMBL2114737	23	182	22	166	25	162	12	73	13	89	10	93
CHEMBL1963803	28	244	38	224	34	228	22	104	12	124	16	120
CHEMBL2354269	276	29	215	22	259	27	99	10	160	17	116	12
CHEMBL3215112	150	10	145	14	175	14	85	9	90	5	60	5
CHEMBL3215096	151	73	161	63	148	64	79	27	69	37	82	36
CHEMBL1963687	82	158	77	133	73	129	34	52	39	77	43	81
CHEMBL1614423	171	205	94	193	181	214	52	101	129	113	42	92
CHEMBL1963689	22	286	36	273	36	259	25	123	11	136	11	150
CHEMBL1794410	209	71	198	61	227	68	108	29	119	39	90	32
CHEMBL1613928	107	102	110	86	113	92	58	38	55	54	52	48
CHEMBL2114850	184	13	172	21	174	16	81	12	93	4	91	9
CHEMBL1963721	107	155	92	133	99	106	42	42	57	64	50	91
CHEMBL1964000	72	212	59	201	53	195	20	92	33	103	39	109
CHEMBL1614202	191	16	163	14	228	16	100	7	128	9	63	7
CHEMBL2028073	39	111	31	123	34	114	13	63	21	51	18	60
CHEMBL2114825	170	35	148	40	154	33	66	19	88	14	82	21
CHEMBL3215013	235	25	216	25	247	28	114	14	133	14	102	11
CHEMBL1794413	248	18	271	16	261	16	142	7	119	9	129	9
CHEMBL2114858	159	79	151	69	154	74	73	32	81	42	78	37
CHEMBL1738402	119	139	112	123	97	126	45	55	52	71	67	68
CHEMBL2114852	238	9	223	9	241	10	113	5	128	5	110	4
CHEMBL2114753	201	18	184	16	207	20	95	9	112	11	89	7
CHEMBL1246088	52	55	123	112	79	71	75	64	4	7	48	48
CHEMBL1613884	295	85	251	74	308	75	132	32	176	43	119	42
CHEMBL1614084	205	28	200	32	197	32	96	18	101	14	104	14
CHEMBL1963717	174	212	164	223	180	211	85	111	95	100	79	112
CHEMBL1613807	9	234	9	209	10	227	5	101	5	126	4	108
CHEMBL1964096	251	33	232	28	219	29	100	12	119	17	132	16
CHEMBL1964108	69	168	63	142	60	130	27	52	33	78	36	90
CHEMBL1963893	58	327	48	299	48	290	19	131	29	159	29	168
CHEMBL1613867	8	235	4	214	8	229	2	104	6	125	2	110
CHEMBL2114842	79	161	92	133	95	140	54	56	41	84	38	77
CHEMBL1614069	88	106	85	132	93	112	45	69	48	43	40	63
CHEMBL3215277	36	369	42	337	32	346	19	157	13	189	23	180
CHEMBL2028074	32	107	39	106	37	109	22	54	15	55	17	52
CHEMBL1614301	141	34	100	28	133	30	46	12	87	18	54	16
CHEMBL2354289	203	101	152	84	187	99	68	41	119	58	84	43
CHEMBL3215288	183	76	223	78	252	90	146	46	106	44	77	32
CHEMBL1794494	256	12	195	12	259	16	99	8	160	8	96	4
CHEMBL2114909	324	6	256	5	330	7	131	3	199	4	125	2
CHEMBL1963805	103	129	98	112	93	101	44	42	49	59	54	70
CHEMBL1794327	27	284	23	251	28	315	12	141	16	174	11	110
CHEMBL1738408	307	4	302	9	289	7	142	6	147	1	160	3
CHEMBL1963947	261	16	266	17	253	19	129	10	124	9	137	7
CHEMBL1963797	62	301	49	314	65	285	26	149	39	136	23	165
CHEMBL1963770	25	287	38	279	35	264	24	128	11	136	14	151
CHEMBL1963811	62	192	57	160	59	154	27	61	32	93	30	99
CHEMBL2114725	128	138	114	118	118	130	52	55	66	75	62	63
CHEMBL3214830	219	23	229	41	208	34	109	26	99	8	120	15
CHEMBL1614359	125	142	122	117	141	133	69	54	72	79	53	63
CHEMBL2114882	20	258	17	227	25	253	11	111	14	142	6	116
CHEMBL3215025	316	22	301	25	297	27	141	15	156	12	160	10
CHEMBL1614128	220	19	216	28	222	29	109	19	113	10	107	9
CHEMBL3214992	228	104	289	91	321	127	191	57	130	70	98	34
CHEMBL1614185	195	72	196	63	179	67	90	29	89	38	106	34
CHEMBL2028075	54	76	63	81	65	79	37	42	28	37	26	39
CHEMBL1963789	75	180	81	153	70	133	38	53	32	80	43	100
CHEMBL1217000	80	118	117	111	99	97	68	45	31	52	49	66
CHEMBL1963971	215	23	198	22	203	25	93	12	110	13	105	10
CHEMBL1738673	250	40	230	30	244	38	112	14	132	24	118	16
CHEMBL1614336	139	120	126	119	143	123	65	61	78	62	61	58
CHEMBL2114872	251	28	201	22	252	24	101	9	151	15	100	13
CHEMBL1614276	183	198	150	176	193	190	80	84	113	106	70	92
CHEMBL2028077	8	174	6	182	8	200	3	104	5	96	3	78
CHEMBL1963752	110	305	168	259	170	260	114	107	56	153	54	152
CHEMBL1614098	9	251	7	277	6	250	2	138	4	112	5	139
CHEMBL1963686	136	259	165	235	151	242	90	109	61	133	75	126
CHEMBL1963716	27	306	28	317	27	309	14	160	13	149	14	157
CHEMBL1794396	318	13	316	15	336	12	167	7	169	5	149	8
CHEMBL2028076	25	135	21	133	24	130	10	64	14	66	11	69
CHEMBL1963702	54	285	50	299	62	276	29	145	33	131	21	154
CHEMBL1963916	265	171	227	171	246	160	104	80	142	80	123	91
CHEMBL1614304	92	147	90	154	84	167	41	87	43	80	49	67
CHEMBL3215157	300	18	283	19	269	17	126	9	143	8	157	10
CHEMBL1614466	268	33	260	25	254	32	123	12	131	20	137	13
CHEMBL1794336	182	205	185	201	183	216	93	106	90	110	92	95
CHEMBL2114865	265	10	261	8	262	10	129	4	133	6	132	4
CHEMBL1737961	27	360	31	355	20	379	12	187	8	192	19	168
CHEMBL1963695	85	256	83	271	92	249	45	132	47	117	38	139
CHEMBL1246087	72	55	195	97	139	56	131	49	8	7	64	48
CHEMBL1794467	228	47	195	52	225	47	96	26	129	21	99	26
CHEMBL1614547	89	221	72	221	93	228	38	114	55	114	34	107
CHEMBL1963764	147	245	130	264	161	221	72	120	89	101	58	144
CHEMBL1794499	95	286	93	237	96	281	47	116	49	165	46	121
CHEMBL2095143	12	182	12	164	10	166	5	74	5	92	7	90
CHEMBL2114816	165	97	133	90	160	93	64	43	96	50	69	47
CHEMBL1863510	603	9	367	8	312	11	38	5	274	6	329	3
CHEMBL1614199	151	149	154	134	137	153	70	69	67	84	84	65
CHEMBL1963825	128	158	130	129	136	125	69	48	67	77	61	81
CHEMBL3215227	101	42	301	146	262	134	231	119	31	15	70	27
CHEMBL1738510	149	162	118	157	157	187	63	91	94	96	55	66
CHEMBL1963711	16	246	11	262	15	246	5	131	10	115	6	131
CHEMBL3214906	202	325	189	286	187	321	87	141	100	180	102	145
CHEMBL1613997	245	19	243	23	252	20	125	12	127	8	118	11
CHEMBL1963743	111	254	135	236	126	240	75	111	51	129	60	125
CHEMBL1119333	262	23	166	26	232	21	68	12	164	9	98	14
CHEMBL1963815	67	238	93	222	100	202	63	93	37	109	30	129
CHEMBL1964118	108	216	139	190	137	178	84	76	53	102	55	114
CHEMBL1738183	138	186	105	170	135	202	51	93	84	109	54	77
CHEMBL1963824	182	119	168	112	160	103	73	48	87	55	95	64
CHEMBL2114821	318	85	300	67	334	68	158	25	176	43	142	42
CHEMBL1738593	349	69	279	73	352	68	141	36	211	32	138	37
CHEMBL1964114	85	204	127	167	124	157	83	60	41	97	44	107
CHEMBL1613929	48	212	50	234	52	204	27	113	25	91	23	121
CHEMBL1963786	181	230	211	195	222	191	126	78	96	113	85	117
CHEMBL1963751	88	242	93	242	103	208	54	104	49	104	39	138
CHEMBL1963753	43	292	40	307	39	297	18	156	21	141	22	151
CHEMBL1963766	74	325	73	322	75	323	37	160	38	163	36	162
CHEMBL1738242	320	67	329	57	329	70	169	30	160	40	160	27
CHEMBL1963798	32	288	28	292	40	268	18	136	22	132	10	156
CHEMBL1794528	82	305	82	304	72	327	36	163	36	164	46	141
CHEMBL1738391	104	220	92	183	100	237	44	100	56	137	48	83
CHEMBL1963804	117	247	131	255	138	244	76	126	62	118	55	129
CHEMBL1963760	31	244	40	250	43	228	26	117	17	111	14	133
CHEMBL1963734	51	380	108	332	109	328	83	140	26	188	25	192
CHEMBL1963773	134	217	145	206	149	193	80	91	69	102	65	115
CHEMBL1963820	78	342	45	362	71	350	19	185	52	165	26	177
CHEMBL1963738	153	260	159	258	174	248	90	123	84	125	69	135
CHEMBL1614433	63	91	43	91	58	72	19	36	39	36	24	55
CHEMBL1964081	177	179	178	151	185	168	93	70	92	98	85	81
CHEMBL1963787	125	271	139	260	134	255	74	122	60	133	65	138
CHEMBL1794531	25	286	25	249	24	319	12	141	12	178	13	108
CHEMBL1614030	305	77	256	70	313	71	132	32	181	39	124	38
CHEMBL1963821	88	382	98	359	102	363	56	170	46	193	42	189
CHEMBL1738513	322	144	316	127	324	115	159	49	165	66	157	78
CHEMBL1738131	112	212	83	192	99	238	35	109	64	129	48	83
CHEMBL1614504	233	39	205	50	236	57	104	34	132	23	101	16
CHEMBL3214993	191	113	235	89	260	128	152	52	108	76	83	37
CHEMBL1963747	65	342	83	312	76	322	47	146	29	176	36	166
CHEMBL1794350	414	16	431	15	447	15	232	7	215	8	199	8
CHEMBL1963712	73	276	93	260	88	258	54	121	34	137	39	139
CHEMBL1909089	67	496	70	476	51	502	27	241	24	261	43	235
CHEMBL1963705	176	291	212	235	222	248	129	96	93	152	83	139
CHEMBL1738249	62	364	48	356	60	372	23	182	37	190	25	174
CHEMBL1963796	108	287	120	277	130	262	71	126	59	136	49	151
CHEMBL1614170	114	268	103	223	123	261	56	108	67	153	47	115
CHEMBL1794383	281	25	298	14	285	25	151	7	134	18	147	7
CHEMBL1963731	162	259	139	268	193	257	85	133	108	124	54	135
CHEMBL1963819	177	312	175	308	192	292	95	144	97	148	80	164
CHEMBL1863512	528	11	317	12	269	9	29	5	240	4	288	7
CHEMBL3214970	243	64	241	57	256	65	127	29	129	36	114	28
CHEMBL3214971	204	289	178	272	206	275	90	129	116	146	88	143
CHEMBL1738414	469	23	414	29	453	20	199	13	254	7	215	16
CHEMBL1963802	138	250	152	240	160	226	87	108	73	118	65	132
CHEMBL1964100	83	308	68	317	85	297	35	153	50	144	33	164
CHEMBL1963780	43	346	40	337	43	343	20	167	23	176	20	170
CHEMBL1963795	216	217	228	198	240	191	126	86	114	105	102	112
CHEMBL1737865	159	267	168	236	165	267	87	118	78	149	81	118
CHEMBL1963696	89	296	80	306	87	298	39	154	48	144	41	152
CHEMBL1963822	35	368	39	366	36	366	20	182	16	184	19	184
CHEMBL1963801	109	406	127	364	112	326	65	142	47	184	62	222
CHEMBL1963818	151	253	189	214	202	199	120	80	82	119	69	134
CHEMBL1964116	107	244	105	246	96	248	47	125	49	123	58	121
CHEMBL1963754	167	280	175	269	214	255	111	122	103	133	64	147
CHEMBL1738424	102	366	88	289	102	351	44	137	58	214	44	152
CHEMBL3215192	230	152	262	144	270	138	151	65	119	73	111	79
CHEMBL1963720	139	318	130	313	139	309	65	152	74	157	65	161
CHEMBL1963728	26	313	27	319	29	314	15	160	14	154	12	159
CHEMBL1614171	23	350	21	331	24	343	11	162	13	181	10	169
CHEMBL1963765	53	378	64	353	55	363	33	169	22	194	31	184
CHEMBL1963710	130	257	149	240	147	235	83	109	64	126	66	131
CHEMBL1963834	150	285	182	248	188	237	110	100	78	137	72	148
CHEMBL1963697	119	377	126	344	129	347	68	157	61	190	58	187
CHEMBL3214929	190	206	274	181	244	175	164	75	80	100	110	106
CHEMBL1963791	56	413	93	361	99	362	68	155	31	207	25	206
CHEMBL1963729	79	422	68	420	81	414	35	206	46	208	33	214
CHEMBL1963733	85	419	106	370	95	339	58	145	37	194	48	225
CHEMBL1737860	448	21	427	15	463	14	221	4	242	10	206	11
CHEMBL1963763	94	309	124	279	118	282	74	126	44	156	50	153
CHEMBL1963688	160	327	178	275	174	252	96	100	78	152	82	175
CHEMBL1964022	109	327	88	310	93	313	36	148	57	165	52	162
CHEMBL2114926	306	220	300	186	302	240	148	103	154	137	152	83
CHEMBL1963793	154	336	169	309	181	311	98	142	83	169	71	167
CHEMBL1963708	220	244	231	218	255	210	133	92	122	118	98	126
CHEMBL1738494	10	445	10	440	18	465	9	230	9	235	1	210
CHEMBL1963737	72	431	55	432	69	425	26	213	43	212	29	219
CHEMBL1963833	51	399	59	379	62	386	35	183	27	203	24	196
CHEMBL1963745	103	299	147	259	148	256	96	108	52	148	51	151
CHEMBL1963724	110	296	147	262	141	262	89	114	52	148	58	148
CHEMBL1738639	225	401	220	403	223	408	109	205	114	203	111	198
CHEMBL3214944	257	138	274	130	247	110	132	51	115	59	142	79
CHEMBL1963938	133	264	122	222	133	262	61	110	72	152	61	112
CHEMBL1963828	63	380	90	341	97	335	62	148	35	187	28	193
CHEMBL1963808	154	354	143	341	175	347	82	167	93	180	61	174
CHEMBL1909172	38	529	44	505	38	518	22	247	16	271	22	258
CHEMBL1738369	181	274	211	239	214	269	122	117	92	152	89	122
CHEMBL1963812	190	273	213	236	237	215	130	89	107	126	83	147
CHEMBL1909182	22	540	16	531	12	541	3	266	9	275	13	265
CHEMBL1963794	112	373	104	366	108	379	50	186	58	193	54	180
CHEMBL1963836	74	413	63	412	77	405	33	202	44	203	30	210
CHEMBL1964105	135	270	145	264	152	252	81	123	71	129	64	141
CHEMBL1963809	102	399	87	396	107	387	46	192	61	195	41	204
CHEMBL1738495	483	9	434	9	467	6	209	3	258	3	225	6
CHEMBL1963800	178	352	169	333	189	305	90	143	99	162	79	190
CHEMBL1963748	181	277	185	279	200	250	102	126	98	124	83	153
CHEMBL1794303	444	13	396	12	450	11	201	5	249	6	195	7
CHEMBL3215210	436	21	430	28	460	33	227	20	233	13	203	8
CHEMBL1737912	342	113	321	129	357	126	168	71	189	55	153	58
CHEMBL1737967	47	419	51	392	48	391	26	182	22	209	25	210
CHEMBL3214902	122	321	115	312	109	319	51	155	58	164	64	157
CHEMBL1614469	246	68	223	79	249	91	113	51	136	40	110	28
CHEMBL1909087	51	515	49	498	36	521	17	252	19	269	32	246
CHEMBL1909088	70	493	75	470	55	499	30	238	25	261	45	232
CHEMBL1909140	38	525	36	509	28	528	13	256	15	272	23	253
CHEMBL1963761	68	423	76	401	94	392	51	185	43	207	25	216
CHEMBL1909093	11	546	6	536	9	542	2	266	7	276	4	270
CHEMBL1963735	137	359	126	357	153	336	71	167	82	169	55	190
CHEMBL1909104	73	486	75	466	66	488	34	234	32	254	41	232
CHEMBL1909114	20	540	18	525	20	533	9	259	11	274	9	266
CHEMBL1963759	71	426	93	378	106	376	64	164	42	212	29	214
CHEMBL1963694	47	443	32	444	51	435	18	218	33	217	14	226
CHEMBL1963756	183	335	192	304	207	297	108	133	99	164	84	171
CHEMBL1909215	23	529	28	511	21	528	13	255	8	273	15	256
CHEMBL1909213	3	560	5	537	4	553	3	265	1	288	2	272
CHEMBL1963783	211	286	210	272	205	284	102	135	103	149	108	137
CHEMBL1963827	177	229	207	198	216	191	123	80	93	111	84	118
CHEMBL1909170	40	528	47	502	41	516	24	245	17	271	23	257
CHEMBL1963707	231	267	233	250	226	269	114	126	112	143	119	124
CHEMBL1909192	3	564	2	549	3	555	1	270	2	285	1	279
CHEMBL1909206	6	557	2	540	6	547	1	265	5	282	1	275
CHEMBL1909095	10	557	4	541	10	544	2	264	8	280	2	277
CHEMBL1909097	5	560	5	542	2	554	1	268	1	286	4	274
CHEMBL1963706	223	297	234	238	219	239	115	90	104	149	119	148
CHEMBL1614522	262	120	287	109	287	105	156	47	131	58	131	62
CHEMBL1909115	22	536	28	513	16	535	11	256	5	279	17	257
CHEMBL1738502	408	84	387	56	399	74	189	23	210	51	198	33
CHEMBL1909139	38	522	38	508	26	524	13	255	13	269	25	253
CHEMBL1909204	14	537	14	517	18	524	9	252	9	272	5	265
CHEMBL1963810	239	212	258	186	253	184	136	79	117	105	122	107
CHEMBL1963767	119	381	98	388	113	385	46	196	67	189	52	192
CHEMBL1963966	517	16	521	18	492	18	248	10	244	8	273	8
CHEMBL1963816	42	423	43	417	59	406	30	200	29	206	13	217
CHEMBL1909103	21	540	10	535	15	541	2	268	13	273	8	267
CHEMBL1738552	154	301	166	284	170	313	91	148	79	165	75	136
CHEMBL1963714	128	409	133	375	131	344	68	155	63	189	65	220
CHEMBL1909102	41	514	38	502	37	512	17	250	20	262	21	252
CHEMBL1963704	161	368	188	306	169	300	98	119	71	181	90	187
CHEMBL1963785	125	396	167	346	166	332	104	141	62	191	63	205
CHEMBL1963739	84	432	65	430	89	418	35	208	54	210	30	222
CHEMBL2114896	248	278	237	249	273	269	131	120	142	149	106	129
CHEMBL1909143	40	512	38	494	36	512	17	247	19	265	21	247
CHEMBL1963817	130	432	173	384	155	356	99	154	56	202	74	230
CHEMBL1963788	305	404	343	330	344	326	191	126	153	200	152	204
CHEMBL1909124	4	564	4	547	2	557	1	270	1	287	3	277
CHEMBL1964119	216	326	225	302	251	298	130	137	121	161	95	165
CHEMBL1963779	256	393	276	329	318	304	169	120	149	184	107	209
CHEMBL1963768	66	369	119	329	113	336	83	148	30	188	36	181
CHEMBL1909084	5	559	4	543	3	552	1	268	2	284	3	275
CHEMBL1909209	49	516	41	506	38	520	15	255	23	265	26	251
CHEMBL1963749	217	308	236	272	237	264	128	114	109	150	108	158
CHEMBL1963792	81	483	80	441	67	446	33	202	34	244	47	239
CHEMBL1963826	172	358	232	287	226	271	143	100	83	171	89	187
CHEMBL1909165	10	542	12	521	14	531	8	255	6	276	4	266
CHEMBL1909211	65	503	66	484	57	503	29	242	28	261	37	242
CHEMBL1909214	8	555	7	532	5	549	2	263	3	286	5	269
CHEMBL1909184	8	560	5	544	5	554	1	269	4	285	4	275
CHEMBL2354308	431	46	421	36	428	46	209	18	219	28	212	18
CHEMBL1909181	18	544	13	532	7	548	1	268	6	280	12	264
CHEMBL1909141	61	505	58	493	53	504	25	246	28	258	33	247
CHEMBL1909171	37	530	40	507	35	521	19	249	16	272	21	258
CHEMBL1909150	24	544	37	512	21	536	17	252	4	284	20	260
CHEMBL1909131	19	548	12	536	19	538	6	263	13	275	6	273
CHEMBL1963699	86	435	74	426	98	415	43	203	55	212	31	223
CHEMBL1909106	10	559	8	543	6	554	2	269	4	285	6	274
CHEMBL1909105	66	498	70	475	52	503	28	240	24	263	42	235
CHEMBL1909142	7	558	7	540	2	556	1	269	1	287	6	271
CHEMBL1963829	69	441	69	413	64	430	32	201	32	229	37	212
CHEMBL1963781	29	469	26	458	29	465	13	227	16	238	13	231
CHEMBL1909091	18	547	12	534	16	541	5	264	11	277	7	270
CHEMBL1909145	10	557	14	536	10	547	7	263	3	284	7	273
CHEMBL1963691	296	320	295	293	313	267	156	120	157	147	139	173
CHEMBL1909090	57	510	56	494	41	518	20	251	21	267	36	243
CHEMBL1909205	6	553	6	536	10	545	5	264	5	281	1	272
CHEMBL1909121	40	513	40	496	38	511	19	247	19	264	21	249
CHEMBL1963719	225	415	211	394	242	365	114	172	128	193	97	222
CHEMBL1963703	152	347	146	343	166	326	80	161	86	165	66	182
CHEMBL1909148	6	561	11	537	7	552	6	264	1	288	5	273
CHEMBL1738578	366	126	354	89	360	113	174	38	186	75	180	51
CHEMBL1963837	487	188	484	173	491	153	244	69	247	84	240	104
CHEMBL1909138	25	540	21	528	18	536	7	262	11	274	14	266
CHEMBL1738682	237	389	227	396	242	389	116	198	126	191	111	198
CHEMBL1963740	215	482	244	400	245	386	137	152	108	234	107	248
CHEMBL1963722	256	303	272	265	318	258	167	110	151	148	105	155
CHEMBL1963832	143	501	182	417	171	422	105	169	66	253	77	248
CHEMBL1963775	113	524	153	444	154	432	97	176	57	256	56	268
CHEMBL1909092	17	550	15	535	16	543	7	264	9	279	8	271
CHEMBL1909157	21	539	20	522	19	535	9	259	10	276	11	263
CHEMBL1909134	32	529	30	517	18	538	8	263	10	275	22	254
CHEMBL1909111	37	530	36	512	27	532	13	257	14	275	23	255
CHEMBL1909108	41	522	42	504	33	524	17	253	16	271	25	251
CHEMBL1909085	50	517	44	502	38	519	16	252	22	267	28	250
CHEMBL1909086	52	516	49	499	41	517	19	250	22	267	30	249
CHEMBL1909112	53	501	52	478	43	501	21	239	22	262	31	239
CHEMBL1909159	44	522	40	509	30	527	13	257	17	270	27	252
CHEMBL2114931	12	610	18	542	16	598	11	265	5	333	7	277
CHEMBL1964102	149	354	135	354	140	358	63	179	77	179	72	175
CHEMBL1614063	16	476	25	425	25	403	17	176	8	227	8	249
CHEMBL1909135	34	523	19	523	17	534	1	267	16	267	18	256
CHEMBL1909110	50	517	44	505	32	526	13	257	19	269	31	248
CHEMBL1909200	14	552	10	539	10	547	3	267	7	280	7	272
CHEMBL1909190	6	546	10	527	6	543	5	262	1	281	5	265
CHEMBL1963693	160	430	158	390	168	370	83	165	85	205	75	225
CHEMBL1963918	179	496	152	434	179	474	76	206	103	268	76	228
CHEMBL1909094	50	501	51	476	47	493	24	234	23	259	27	242
CHEMBL1963823	123	497	150	436	147	443	87	191	60	252	63	245
CHEMBL2114932	703	31	543	25	688	32	264	13	424	19	279	12
CHEMBL1909156	37	531	35	515	24	536	11	260	13	276	24	255
CHEMBL1909132	27	536	20	526	17	538	5	264	12	274	15	262
CHEMBL1909130	23	545	20	525	31	522	14	251	17	271	6	274
CHEMBL3215029	406	372	425	371	443	397	231	198	212	199	194	173
CHEMBL2114818	703	31	542	26	693	27	266	11	427	16	276	15
CHEMBL1909107	14	555	10	541	12	548	4	267	8	281	6	274
CHEMBL1963771	312	353	283	342	287	321	129	155	158	166	154	187
CHEMBL1909180	12	552	11	536	7	548	3	266	4	282	8	270
CHEMBL1963725	203	433	180	418	163	421	70	203	93	218	110	215
CHEMBL1963741	205	429	204	402	197	401	98	187	99	214	106	215
CHEMBL1909116	20	540	17	526	13	540	5	263	8	277	12	263
CHEMBL1909109	59	502	59	486	42	510	21	247	21	263	38	239
CHEMBL1963807	413	279	409	228	420	217	208	83	212	134	201	145
CHEMBL1909158	7	562	6	544	3	556	1	269	2	287	5	275
CHEMBL1963772	283	331	305	276	318	263	170	104	148	159	135	172
CHEMBL1614302	10	675	8	662	6	717	2	352	4	365	6	310
CHEMBL1909174	38	530	44	504	40	518	23	246	17	272	21	258
CHEMBL1964002	239	868	253	740	238	856	126	364	112	492	127	376
CHEMBL1909203	11	545	11	528	10	535	5	259	5	276	6	269
CHEMBL1909136	41	517	41	500	30	519	15	251	15	268	26	249
CHEMBL1964107	346	367	329	351	347	330	165	157	182	173	164	194
CHEMBL1909210	25	541	25	522	16	543	8	262	8	281	17	260
CHEMBL1794574	714	8	606	6	678	8	285	3	393	5	321	3
CHEMBL1963757	132	484	172	415	170	401	105	166	65	235	67	249
CHEMBL1738239	227	599	224	535	197	534	97	235	100	299	127	300
CHEMBL1963690	278	417	280	375	294	354	148	156	146	198	132	219
CHEMBL1964101	430	253	427	215	427	212	212	87	215	125	215	128
CHEMBL1963715	287	318	298	291	291	277	151	125	140	152	147	166
CHEMBL1909191	25	542	36	514	23	536	17	254	6	282	19	260
CHEMBL1909201	15	549	13	534	10	547	4	266	6	281	9	268
CHEMBL1909186	2	564	3	546	3	556	2	269	1	287	1	277
CHEMBL1963746	207	437	211	386	198	391	101	170	97	221	110	216
CHEMBL1963913	1025	18	943	17	1004	15	461	7	543	8	482	10
CHEMBL1963701	215	424	198	401	183	403	83	190	100	213	115	211
CHEMBL1963718	189	462	230	390	225	368	133	148	92	220	97	242
CHEMBL1963726	370	415	307	427	381	380	159	196	222	184	148	231
CHEMBL1963750	236	387	260	322	230	319	127	127	103	192	133	195
CHEMBL1737966	457	130	449	117	500	135	246	61	254	74	203	56
CHEMBL1964015	178	525	159	451	185	492	83	209	102	283	76	242
CHEMBL1614004	580	107	521	87	575	94	258	37	317	57	263	50
CHEMBL1909123	6	560	4	545	4	555	1	270	3	285	3	275
CHEMBL1614041	201	605	189	522	236	585	112	251	124	334	77	271
CHEMBL1909173	43	526	47	504	38	522	21	250	17	272	26	254
CHEMBL1614175	94	375	90	358	84	385	40	184	44	201	50	174
CHEMBL1963830	415	315	387	302	412	283	192	135	220	148	195	167
CHEMBL1909169	9	555	10	536	9	545	5	263	4	282	5	273
CHEMBL1963723	253	315	248	300	285	301	140	143	145	158	108	157
CHEMBL1963972	728	138	662	127	726	141	330	65	396	76	332	62
CHEMBL1614432	37	745	41	642	48	741	26	319	22	422	15	323
CHEMBL1964095	239	449	201	401	238	432	100	192	138	240	101	209
CHEMBL1614524	601	101	560	68	595	93	277	30	318	63	283	38
CHEMBL2114812	979	5	870	8	909	7	400	5	509	2	470	3
CHEMBL1738500	381	973	330	862	333	985	141	437	192	548	189	425
CHEMBL1964104	185	480	259	376	248	368	161	132	87	236	98	244
CHEMBL3215245	321	426	321	405	336	445	168	212	168	233	153	193
CHEMBL2114934	804	24	730	25	680	25	303	13	377	12	427	12
CHEMBL3214915	403	232	365	229	384	211	173	104	211	107	192	125
CHEMBL1963742	160	457	149	424	159	415	74	191	85	224	75	233
CHEMBL1909212	11	548	8	530	9	542	3	262	6	280	5	268
CHEMBL2114916	312	240	322	224	340	256	175	120	165	136	147	104
CHEMBL1614499	347	275	300	247	347	274	150	123	197	151	150	124
CHEMBL1613870	596	103	503	105	585	108	246	55	339	53	257	50
CHEMBL1614019	414	224	580	194	642	208	404	89	238	119	176	105
CHEMBL3215183	999	322	962	309	1007	331	485	159	522	172	477	150
CHEMBL1963782	163	495	143	482	156	475	68	231	88	244	75	251
CHEMBL1614169	8	1140	9	1101	11	1109	6	535	5	574	3	566
CHEMBL2114734	788	10	713	13	691	15	308	9	383	6	405	4
CHEMBL1963814	306	390	328	321	346	313	184	122	162	191	144	199
CHEMBL1963999	925	13	870	7	903	16	424	5	479	11	446	2
CHEMBL2114716	546	81	550	66	548	83	276	34	272	49	274	32
CHEMBL1614529	560	162	567	132	617	170	312	70	305	100	255	62
CHEMBL3215004	575	229	528	217	567	238	260	113	307	125	268	104
CHEMBL2114714	184	783	176	688	156	773	74	339	82	434	102	349
CHEMBL1614122	500	549	479	532	471	557	225	270	246	287	254	262
CHEMBL1794366	273	786	232	708	263	720	111	321	152	399	121	387
CHEMBL1613944	359	160	681	186	674	180	498	103	176	77	183	83
CHEMBL1613896	433	643	426	610	421	639	207	303	214	336	219	307
CHEMBL1794523	263	796	247	693	266	717	125	307	141	410	122	386
CHEMBL1794349	949	532	876	450	939	496	433	207	506	289	443	243
CHEMBL1963736	149	546	132	523	153	499	68	238	85	261	64	285
CHEMBL1963835	259	479	234	462	287	435	131	209	156	226	103	253
CHEMBL1614217	109	1247	90	1179	105	1274	43	603	62	671	47	576
CHEMBL1963727	239	402	286	333	285	321	166	126	119	195	120	207
CHEMBL1613820	807	224	684	215	791	249	334	120	457	129	350	95
CHEMBL1614195	604	257	526	254	614	293	268	145	346	148	258	109
CHEMBL1614339	184	613	155	545	177	634	74	283	103	351	81	262
CHEMBL3214953	607	247	581	237	614	266	294	128	320	138	287	109
CHEMBL3214811	227	682	238	621	279	687	145	313	134	374	93	308
CHEMBL1266185	105	741	107	727	96	726	49	356	47	370	58	371
CHEMBL1613924	856	293	822	281	864	298	415	143	449	155	407	138
CHEMBL3215079	197	840	163	731	172	815	69	353	103	462	94	378
CHEMBL1614192	296	796	273	688	323	792	150	342	173	450	123	346
CHEMBL1614285	761	279	692	273	783	278	357	136	426	142	335	137
CHEMBL1614121	891	513	880	482	935	483	462	226	473	257	418	256
CHEMBL1614155	501	183	460	150	513	169	236	68	277	101	224	82
CHEMBL1614201	424	668	399	562	479	636	227	265	252	371	172	297
CHEMBL1963790	287	411	275	380	292	385	140	177	152	208	135	203
CHEMBL1738132	145	1367	118	1230	139	1383	56	623	83	760	62	607
CHEMBL1613794	296	858	302	718	318	834	162	347	156	487	140	371
CHEMBL1614067	702	435	702	388	738	415	369	184	369	231	333	204
CHEMBL1963888	290	907	255	798	271	935	118	413	153	522	137	385
CHEMBL3214967	382	905	295	801	351	912	132	404	219	508	163	397
CHEMBL3215169	456	440	431	370	441	410	208	170	233	240	223	200
CHEMBL1738573	1014	11	894	14	986	13	433	8	553	5	461	6
CHEMBL1794310	59	1558	53	1322	58	1536	26	650	32	886	27	672
CHEMBL1613779	46	221	224	255	240	242	209	138	31	104	15	117
CHEMBL1614501	1126	45	967	32	1151	37	496	12	655	25	471	20
CHEMBL3214913	693	700	685	619	656	649	324	284	332	365	361	335
CHEMBL1614090	823	577	733	533	834	598	372	277	462	321	361	256
CHEMBL2114796	1148	275	1083	241	1091	280	513	123	578	157	570	118
CHEMBL1614554	164	429	164	406	178	443	89	210	89	233	75	196
CHEMBL1614456	535	20	693	24	728	24	443	14	285	10	250	10
CHEMBL3215073	265	1391	251	1233	258	1360	122	601	136	759	129	632
CHEMBL1613936	1207	235	1159	227	1226	242	589	117	637	125	570	110
CHEMBL1613803	629	20	718	23	743	23	416	13	327	10	302	10
CHEMBL1738598	859	634	803	533	892	575	418	237	474	338	385	296
CHEMBL1737993	1486	33	1384	34	1492	37	695	19	797	18	689	15
CHEMBL1614027	938	395	863	437	1191	512	558	277	633	235	305	160
CHEMBL1613792	382	1044	291	1008	369	1118	139	541	230	577	152	467
CHEMBL1614134	359	1270	324	1106	371	1282	168	559	203	723	156	547
CHEMBL1614158	61	416	189	458	200	442	164	242	36	200	25	216
CHEMBL1794496	1466	58	1398	56	1436	58	684	28	752	30	714	28
CHEMBL1794512	702	598	632	517	704	633	317	276	387	357	315	241
CHEMBL1614120	2	2110	3	1930	3	2166	2	993	1	1173	1	937
CHEMBL1794324	1194	238	1048	244	1158	236	506	121	652	115	542	123
CHEMBL1613869	841	484	746	445	867	487	386	224	481	263	360	221
CHEMBL1040693	88	1679	79	1609	105	1618	48	774	57	844	31	835
CHEMBL3215046	448	1278	415	1154	463	1214	215	545	248	669	200	609
CHEMBL1963988	336	1343	302	1181	326	1352	146	595	180	757	156	586
CHEMBL2114924	69	1897	66	1669	69	1864	33	818	36	1046	33	851
CHEMBL1794426	1318	150	1163	155	1277	143	561	74	716	69	602	81
CHEMBL1614164	756	429	671	386	781	413	348	185	433	228	323	201
CHEMBL3214845	461	597	468	552	477	597	242	276	235	321	226	276
CHEMBL1614252	243	358	212	337	255	375	112	177	143	198	100	160
CHEMBL1614064	2047	210	1824	146	2009	206	893	71	1116	135	931	75
CHEMBL1614213	1396	545	1195	444	1401	537	600	218	801	319	595	226
CHEMBL1614307	2698	32	2522	24	2806	32	1315	12	1491	20	1207	12
CHEMBL1613797	887	362	853	339	1006	391	486	184	520	207	367	155
CHEMBL1614110	1126	397	1036	376	1200	455	555	217	645	238	481	159
CHEMBL1794536	1417	192	1298	154	1299	200	590	81	709	119	708	73
CHEMBL1614141	550	1150	479	1029	515	1165	222	522	293	643	257	507
CHEMBL1614153	660	808	612	704	666	748	309	322	357	426	303	382
CHEMBL3215270	1025	924	993	843	978	859	473	389	505	470	520	454
CHEMBL1614137	951	466	857	421	976	461	441	208	535	253	416	213
CHEMBL1613777	1340	442	1238	491	1552	573	725	311	827	262	513	180
CHEMBL1738569	1449	70	1343	76	1448	82	671	44	777	38	672	32
CHEMBL1614538	1556	719	1368	621	1508	726	660	314	848	412	708	307
CHEMBL1614166	66	3105	56	2967	74	3106	32	1484	42	1622	24	1483
CHEMBL1614263	504	1513	455	1333	533	1574	242	697	291	877	213	636
CHEMBL1613829	1262	1001	1202	907	1260	994	600	450	660	544	602	457
CHEMBL1613800	402	2287	381	2207	379	2406	179	1163	200	1243	202	1044
CHEMBL1614481	1093	1952	858	1684	1103	1968	434	850	669	1118	424	834
CHEMBL1613776	1447	964	1201	806	1414	940	584	391	830	549	617	415
CHEMBL1614240	900	999	898	1032	896	1109	447	571	449	538	451	461
CHEMBL1794486	873	1333	850	1132	899	1363	438	581	461	782	412	551
CHEMBL1613970	131	2955	154	2507	163	2976	93	1264	70	1712	61	1243
CHEMBL1613886	2352	550	2319	479	2693	595	1330	262	1363	333	989	217
CHEMBL1738606	527	2181	486	1980	543	2141	251	970	292	1171	235	1010
CHEMBL2354282	347	2585	308	2440	345	2489	153	1172	192	1317	155	1268
CHEMBL1614331	66	3568	51	3581	67	4309	26	2161	41	2148	25	1420
CHEMBL1614531	218	2369	196	2246	232	2443	105	1160	127	1283	91	1086
CHEMBL3215017	1321	1416	1221	1207	1300	1333	600	562	700	771	621	645
CHEMBL1613983	2002	254	1782	194	1954	248	867	94	1087	154	915	100
CHEMBL1613930	713	1487	690	1161	779	1480	378	577	401	903	312	584
CHEMBL1738317	2957	1131	2532	928	2859	1175	1217	486	1642	689	1315	442
CHEMBL1614521	620	1639	584	1454	604	1659	284	737	320	922	300	717
CHEMBL1614108	158	3847	105	3925	169	4508	58	2293	111	2215	47	1632
CHEMBL1614076	947	2110	886	1983	887	2129	413	1001	474	1128	473	982
CHEMBL1614428	878	1829	743	1722	893	1915	379	904	514	1011	364	818
CHEMBL1614453	636	2063	659	1854	727	2069	375	930	352	1139	284	924
CHEMBL1794495	13	7561	11	6894	16	6941	7	3137	9	3804	4	3757
CHEMBL2114817	949	2054	814	1811	941	2069	403	913	538	1156	411	898
CHEMBL1794569	3252	253	2982	237	3212	276	1471	130	1741	146	1511	107
CHEMBL2114807	2818	1805	2415	1620	2723	1807	1160	811	1563	996	1255	809
CHEMBL1614227	1896	2422	1881	2239	1987	2523	986	1170	1001	1353	895	1069
CHEMBL1613995	1122	1360	924	1248	1100	1386	451	637	649	749	473	611
CHEMBL1614414	710	1868	608	1736	684	1882	291	875	393	1007	317	861
CHEMBL1613996	158	3578	145	3168	165	3636	76	1613	89	2023	69	1555
CHEMBL1613808	834	2026	749	1846	917	2060	416	940	501	1120	333	906
CHEMBL1794461	174	7381	150	6227	160	7452	68	3149	92	4303	82	3078
CHEMBL2114836	520	4603	451	4080	529	4695	230	2086	299	2609	221	1994
CHEMBL1614052	2170	174	1953	146	2157	162	970	67	1187	95	983	79
CHEMBL1614234	555	5625	586	4886	615	5525	323	2393	292	3132	263	2493
CHEMBL1613992	1970	2235	1687	1829	1943	2316	830	955	1113	1361	857	874
CHEMBL1614103	1093	3971	928	3417	1129	3952	482	1699	647	2253	446	1718
CHEMBL2114738	563	5562	532	4738	577	5556	273	2366	304	3190	259	2372
CHEMBL1794585	27	9048	18	7832	23	9326	7	4055	16	5271	11	3777
CHEMBL1614364	1007	5619	913	5179	1008	5644	457	2602	551	3042	456	2577
CHEMBL1794311	2443	2426	2305	1962	2446	2482	1154	1009	1292	1473	1151	953
CHEMBL1963935	325	6651	278	6391	271	6708	112	3224	159	3484	166	3167
CHEMBL2114713	4443	1487	4060	1208	4371	1471	1994	596	2377	875	2066	612
CHEMBL1614281	1796	2386	1673	2131	1985	2465	931	1105	1054	1360	742	1026
CHEMBL2114861	355	5459	335	4790	362	5529	171	2430	191	3099	164	2360
CHEMBL3215278	6912	435	6357	415	7089	432	3267	206	3822	226	3090	209
CHEMBL2114784	2590	3969	2519	3534	2483	3927	1206	1746	1277	2181	1313	1788
CHEMBL1614031	1614	3549	1340	3093	1606	3568	666	1556	940	2012	674	1537
CHEMBL1614275	1981	716	1850	631	1939	743	904	329	1035	414	946	302
CHEMBL1794440	36	8901	27	8066	39	8689	15	3927	24	4762	12	4139
CHEMBL1964014	386	6802	341	6382	383	6814	169	3197	214	3617	172	3185
CHEMBL1613910	3701	2874	3665	2713	3976	3047	1970	1443	2006	1604	1695	1270
CHEMBL1963954	378	8340	341	7886	333	8438	148	3992	185	4446	193	3894
CHEMBL1964086	530	7190	445	6797	497	7129	206	3368	291	3761	239	3429
CHEMBL1964062	620	7999	512	7554	578	8091	235	3823	343	4268	277	3731
CHEMBL1963887	638	8681	537	8255	565	8760	232	4167	333	4593	305	4088
CHEMBL1614280	1739	5350	1513	4804	1716	5366	745	2410	971	2956	768	2394
CHEMBL1963848	469	8431	404	7994	429	8553	182	4058	247	4495	222	3936
CHEMBL1963889	456	8284	416	7855	430	8291	195	3931	235	4360	221	3924
CHEMBL1741321	1915	7239	1727	7140	2020	8223	916	4062	1104	4161	811	3078
CHEMBL1614250	2325	3772	2059	3204	2426	3766	1080	1599	1346	2167	979	1605
CHEMBL1614361	1280	3177	1276	2738	1486	3213	741	1387	745	1826	535	1351
CHEMBL1741325	3149	5690	2888	5560	3425	6408	1582	3139	1843	3269	1306	2421
CHEMBL2354287	4916	3770	4496	3458	4888	3832	2234	1760	2654	2072	2262	1698
CHEMBL1614502	2191	1604	2091	1362	2270	1592	1085	675	1185	917	1006	687
CHEMBL1614342	7314	1390	6185	1310	7167	1402	3019	661	4148	741	3166	649
CHEMBL1741323	4225	4888	3867	4886	4496	5718	2069	2858	2427	2860	1798	2028
CHEMBL1963963	506	8636	441	8175	473	8691	204	4115	269	4576	237	4060
CHEMBL1794584	3413	5492	3209	4779	3306	5443	1551	2365	1755	3078	1658	2414
CHEMBL1613918	3487	3136	3097	2873	3592	3217	1601	1477	1991	1740	1496	1396
CHEMBL1741322	3952	5078	4185	4447	4595	5409	2414	2389	2181	3020	1771	2058
CHEMBL1964074	525	8978	460	8476	481	9032	208	4265	273	4767	252	4211
CHEMBL2114913	158	10705	137	9690	149	10803	64	4894	85	5909	73	4796
CHEMBL1741324	3647	5066	3347	4969	4052	5533	1876	2718	2176	2815	1471	2251
CHEMBL1614410	484	8849	420	7674	488	8753	212	3789	276	4964	208	3885
CHEMBL1613838	8843	1782	7524	1660	8673	1818	3677	848	4996	970	3847	812
CHEMBL1794424	2601	8405	2622	7084	2699	8447	1360	3563	1339	4884	1262	3521
CHEMBL2114775	8007	2566	7112	2320	8119	2608	3612	1181	4507	1427	3500	1139
CHEMBL1614079	4772	7741	4170	6726	4854	8067	2126	3526	2728	4541	2044	3200
CHEMBL1614038	4459	4438	4186	4049	4541	4571	2134	2091	2407	2480	2052	1958
CHEMBL1737991	11780	3825	10298	3531	11640	3826	5079	1766	6561	2060	5219	1765
CHEMBL2114843	6863	5349	6215	4751	6674	5414	3013	2408	3661	3006	3202	2343
CHEMBL1614211	776	17168	727	14933	771	17243	361	7504	410	9739	366	7429
CHEMBL1964017	980	17556	993	17152	899	17698	456	8647	443	9051	537	8505
CHEMBL1964099	802	15780	820	15547	760	15933	389	7850	371	8083	431	7697
CHEMBL1963885	1045	17541	1023	17224	978	17687	478	8685	500	9002	545	8539
CHEMBL2114788	4433	12498	3923	10734	4500	12144	1995	5190	2505	6954	1928	5544
CHEMBL1613769	3405	11464	3096	9755	3399	11573	1545	4932	1854	6641	1551	4823
CHEMBL1613836	354	18249	320	15843	338	18028	152	7811	186	10217	168	8032
CHEMBL1614174	7514	6283	7095	5721	7607	6426	3594	2932	4013	3494	3501	2789
CHEMBL1963976	1168	17110	1150	16748	1108	17184	545	8411	563	8773	605	8337
CHEMBL1963900	982	16509	1000	16074	920	16601	469	8083	451	8518	531	7991
CHEMBL1738312	10940	6023	9488	5393	10832	5996	4690	2683	6142	3313	4798	2710
CHEMBL1614544	5780	4928	4970	4391	5730	4945	2460	2204	3270	2741	2510	2187
CHEMBL1794352	17642	438	14951	370	17541	468	7425	200	10116	268	7526	170
CHEMBL1963945	908	16519	927	16098	899	16601	459	8090	440	8511	468	8008
CHEMBL1964045	962	17875	909	17532	869	18013	408	8835	461	9178	501	8697
CHEMBL1964063	902	17350	921	17005	883	17469	451	8562	432	8907	470	8443
CHEMBL2114780	4270	13225	3890	11238	4296	13105	1958	5559	2338	7546	1932	5679
CHEMBL1614236	1973	15812	1731	13895	1938	16019	848	7051	1090	8968	883	6844
CHEMBL1614161	7802	9383	7426	8569	8176	9516	3900	4351	4276	5165	3526	4218
CHEMBL1963882	1508	17251	1517	16848	1465	17363	737	8480	728	8883	780	8368
CHEMBL1964034	1081	22215	1024	21545	979	22348	461	10839	518	11509	563	10706
CHEMBL1613914	2839	13232	2606	12078	2859	13164	1313	6005	1546	7159	1293	6073
CHEMBL1963921	1194	17441	1201	17103	1121	17548	564	8605	557	8943	637	8498
CHEMBL1614441	8577	7156	7705	6349	8608	7245	3868	3219	4740	4026	3837	3130
CHEMBL3215181	481	20081	493	17719	500	19726	256	8682	244	11044	237	9037
CHEMBL1614257	1802	9247	1652	7914	1870	9207	860	3937	1010	5270	792	3977
CHEMBL1964009	1313	22744	1281	21975	1234	22837	601	11034	633	11803	680	10941
CHEMBL1963991	1282	22361	1226	21781	1198	22528	571	10974	627	11554	655	10807
CHEMBL1613842	5739	13652	5022	11908	5733	13708	2508	5982	3225	7726	2514	5926
CHEMBL1964075	1757	22790	1698	21899	1669	22859	805	10984	864	11875	893	10915
CHEMBL1963860	1169	23037	1170	22087	1141	23108	571	11079	570	12029	599	11008
CHEMBL1964065	2158	20020	2097	19447	2105	20227	1022	9827	1083	10400	1075	9620
CHEMBL1964087	1003	25140	997	24329	924	25235	459	12212	465	13023	538	12117
CHEMBL1963895	1000	24555	980	23779	914	24718	447	11971	467	12747	533	11808
CHEMBL1964092	1648	23676	1565	22850	1585	23722	751	11448	834	12274	814	11402
CHEMBL1963994	2203	22302	2101	21625	2136	22447	1017	10885	1119	11562	1084	10740
CHEMBL1964025	1294	23923	1219	23119	1185	24048	555	11622	630	12426	664	11497
CHEMBL1964004	1204	23692	1135	22906	1103	23790	517	11502	586	12288	618	11404
CHEMBL1963866	1361	23630	1287	22886	1238	23846	582	11551	656	12295	705	11335
CHEMBL1963903	1428	25068	1325	24182	1303	25224	600	12169	703	13055	725	12013
CHEMBL1964066	793	25459	821	24572	778	25577	403	12345	375	13232	418	12227
CHEMBL1964037	1370	24841	1333	24029	1309	24996	636	12092	673	12904	697	11937
CHEMBL1964018	1395	23851	1300	23155	1269	24008	587	11656	682	12352	713	11499
CHEMBL1963844	1026	24240	1014	23410	948	24416	468	11793	480	12623	546	11617
CHEMBL1964091	969	24666	963	23967	934	24831	464	12066	470	12765	499	11901
CHEMBL1964049	840	25575	842	24677	782	25680	392	12391	390	13289	450	12286
CHEMBL1963911	1346	23879	1274	23186	1248	24039	588	11673	660	12366	686	11513
CHEMBL1964059	1117	25653	1068	24734	1015	25791	483	12436	532	13355	585	12298
CHEMBL1963961	2294	23535	2250	22668	2282	23523	1119	11328	1163	12195	1131	11340
CHEMBL1964043	1237	25071	1201	24135	1162	25174	563	12119	599	13055	638	12016
CHEMBL1964021	1465	25049	1365	24173	1376	25140	638	12132	738	13008	727	12041
CHEMBL1964085	1271	25310	1227	24555	1184	25473	570	12359	614	13114	657	12196
CHEMBL1963880	912	25473	909	24652	867	25607	432	12393	435	13214	477	12259
CHEMBL1964040	2042	24672	1985	23796	2027	24760	985	11942	1042	12818	1000	11854
CHEMBL1964088	1756	23311	1709	22521	1737	23390	845	11300	892	12090	864	11221
CHEMBL1964007	902	25740	902	24789	856	25891	428	12470	428	13421	474	12319
CHEMBL1964047	1433	25626	1351	24794	1330	25850	624	12509	706	13341	727	12285
CHEMBL1963901	1567	24648	1515	23788	1504	24784	726	11962	778	12822	789	11826
CHEMBL1614421	7393	5211	6665	4732	7524	5293	3398	2407	4126	2886	3267	2325
CHEMBL1963990	1224	25407	1180	24506	1158	25555	557	12327	601	13228	623	12179
CHEMBL1963876	1348	25430	1254	24573	1214	25651	560	12397	654	13254	694	12176
CHEMBL1963989	1339	25341	1261	24560	1248	25523	585	12371	663	13152	676	12189
CHEMBL1614249	453	18329	409	15975	480	18190	218	7918	262	10272	191	8057
CHEMBL1963953	1374	25125	1340	24336	1266	25317	616	12264	650	13053	724	12072
CHEMBL1963854	1316	25977	1240	25060	1236	26123	580	12603	656	13520	660	12457
CHEMBL1963985	1370	25755	1280	24857	1228	25940	569	12521	659	13419	711	12336
CHEMBL1964030	1896	24571	1832	23738	1838	24743	887	11955	951	12788	945	11783
CHEMBL1963960	1057	25867	1042	24895	985	25916	485	12472	500	13444	557	12423
CHEMBL1963929	1339	25490	1288	24598	1281	25528	615	12318	666	13210	673	12280
CHEMBL1964006	1352	25692	1367	24692	1339	25762	677	12381	662	13381	690	12311
CHEMBL1963868	1364	25415	1301	24624	1305	25639	621	12424	684	13215	680	12200
CHEMBL1963922	1355	25703	1277	24859	1254	25798	588	12477	666	13321	689	12382
CHEMBL1964077	1309	25606	1276	24702	1239	25690	603	12393	636	13297	673	12309
CHEMBL1964048	1369	25836	1330	24913	1283	26017	622	12547	661	13470	708	12366
CHEMBL1964012	1354	25521	1364	24499	1310	25566	660	12272	650	13294	704	12227
CHEMBL3215106	211	29394	200	24435	205	29487	97	12264	108	17223	103	12171
CHEMBL1614087	14631	5746	13050	5123	14753	5751	6586	2564	8167	3187	6464	2559
CHEMBL2114810	260	40398	281	34894	305	41208	163	17852	142	23356	118	17042
CHEMBL1963874	1632	25239	1558	24414	1578	25355	752	12265	826	13090	806	12149
CHEMBL1964072	1560	25653	1511	24786	1527	25777	739	12455	788	13322	772	12331
CHEMBL1963981	1301	25600	1239	24661	1198	25709	568	12385	630	13324	671	12276
CHEMBL2354254	34086	673	30302	567	34000	662	15108	278	18892	384	15194	289
CHEMBL1614530	12287	19683	10502	16721	12301	20008	5258	8523	7043	11485	5244	8198
CHEMBL1738442	21162	7849	18962	6985	21458	7826	9629	3481	11829	4345	9333	3504
CHEMBL1794553	2027	37840	1976	33609	2089	38659	1019	17214	1070	21445	957	16395
CHEMBL1614458	11849	23063	10429	20791	12108	23756	5344	10742	6764	13014	5085	10049
CHEMBL2354221	43888	353	38647	336	43911	349	19335	166	24576	183	19312	170
CHEMBL1614459	25276	1508	21355	1323	25331	1515	10705	665	14626	850	10650	658
CHEMBL1794345	15523	42514	13540	36769	15417	42711	6717	18483	8700	24228	6823	18286
CHEMBL1794580	12409	32119	11044	27707	12471	32082	5553	13835	6918	18247	5491	13872
CHEMBL1794401	1491	53363	1312	45625	1475	53066	648	22664	827	30402	664	22961
CHEMBL1794483	2769	58268	2532	48789	2637	58385	1200	24453	1437	33932	1332	24336
