# Supplementary material for: Large-scale comparison of machine learning methods for drug target prediction on ChEMBL
Source: Royal Society of Chemistry journal article supplement (doi:10.1039/c8sc00148k), 2018-01-01
Supplement: c8sc00148k3.csv [file c8sc00148k3.csv]

	StaticF	SemiF	ECFP6	DFS8	ECFP6+ToxF
CHEMBL1614338	0.485653235653236	0.629120879120879	0.911477411477411	0.756410256410256	0.715811965811966
CHEMBL1243971	0.551440329218107	0.426954732510288	0.415637860082305	0.511316872427984	0.361111111111111
CHEMBL1614044	0.641208964646465	0.81729797979798	0.710479797979798	0.874147727272727	0.80864898989899
CHEMBL2045986	0.905820105820106	0.864094143404488	0.93968253968254	0.888888888888889	0.95615763546798
CHEMBL618396	0.918889966852615	0.988304093567251	0.947368421052632	0.98292774948123	0.943784191661951
CHEMBL3079731	0.478586171310629	0.452896948252985	0.481225121627598	0.770396579684505	0.475770308123249
CHEMBL1794498	0.953862433862434	0.957369929453263	0.954772927689594	0.950961199294533	0.949440035273369
CHEMBL2091156	0.882231040564374	0.849581128747795	0.883553791887125	0.914803791887125	0.876477072310406
CHEMBL2363253	0.6311056998557	0.737653318903319	0.743659812409812	0.590674603174603	0.673511904761905
CHEMBL1738192	0.811709401709402	0.793162393162393	0.779615384615385	0.76517094017094	0.878461538461538
CHEMBL1614154	0.781989622870896	0.973063973063973	0.846358320042531	0.868491112677159	0.886461514368491
CHEMBL1964055	0.795378352490421	0.822557471264368	0.567289272030651	0.615541187739464	0.797772988505747
CHEMBL2363800	0.462905844155844	0.506655844155844	0.578165584415584	0.456628787878788	0.568154761904762
CHEMBL1794420	0.909531826198493	0.912722462722463	0.92365720699054	0.924895783229117	0.932034632034632
CHEMBL2363263	0.517891480012692	0.605551294945234	0.615360789603214	0.619841157719946	0.640496708678527
CHEMBL2363552	0.722456475703229	0.781019845954911	0.790240062967336	0.732801109424486	0.804988662131519
CHEMBL2363168	0.715582010582011	0.828320105820106	0.692685185185185	0.606772486772487	0.747354497354497
CHEMBL3214806	0.594887955182073	0.747254901960784	0.917114845938375	0.82656862745098	0.876134453781513
CHEMBL1794455	0.912390602173884	0.955218706302298	0.939790653103347	0.942463109645772	0.950929909443841
CHEMBL1613998	0.568441169571277	0.717905783002856	0.563857956975894	0.703778752880463	0.602517558747637
CHEMBL1614056	0.706732804232804	0.835238095238095	0.776031746031746	0.822513227513228	0.824920634920635
CHEMBL1613903	0.471293429652563	0.555833210477173	0.522733303847855	0.583134306354121	0.573765295591921
CHEMBL2363184	0.548765432098765	0.66820987654321	0.699691358024691	0.514969135802469	0.704938271604938
CHEMBL1738619	0.540838046585173	0.712339597397069	0.680137444505261	0.689761600681141	0.663260962111537
CHEMBL2363227	0.567734584906302	0.724701561065197	0.677177498894671	0.610791415841921	0.70255416114002
CHEMBL1738514	0.59574187487231	0.629580274797666	0.482052987270379	0.551384235732062	0.45839365143713
CHEMBL2114927	0.29792445846969	0.456172731286686	0.53504850397382	0.520367448444237	0.552073593579554
CHEMBL763093	0.80065986644934	0.898683188156872	0.776625421362263	0.807343241553768	0.799497286339392
CHEMBL1614525	0.662875280583614	0.731593714927048	0.709129489337823	0.68896955667789	0.711191778900112
CHEMBL2114803	0.819714506172839	0.858873456790124	0.85516975308642	0.802469135802469	0.858989197530864
CHEMBL1613775	0.789108862918387	0.902256526542241	0.893827354303545	0.903938988700894	0.863302129968797
CHEMBL1614373	0.392094017094017	0.54268648018648	0.548271173271173	0.593288655788656	0.590345765345765
CHEMBL1614070	0.617521367521368	0.706552706552707	0.711538461538462	0.648148148148148	0.586894586894587
CHEMBL1026934	0.993197278911565	0.984966826236668	0.993197278911565	0.983265306122449	0.968945998152347
CHEMBL1026933	0.947619047619048	0.954761904761905	0.919047619047619	0.983333333333333	0.980952380952381
CHEMBL2363723	0.625359477124183	0.689868998104292	0.715897914721444	0.659822312763489	0.74884022295787
CHEMBL864855	0.503858024691358	0.522376543209877	0.628858024691358	0.66820987654321	0.506172839506173
CHEMBL772766	0.585582010582011	0.66848544973545	0.729761904761905	0.573214285714286	0.708333333333333
CHEMBL806152	0.915850815850816	0.904118104118104	0.872494172494172	0.817404817404817	0.880613830613831
CHEMBL1613812	0.74031007751938	0.761466408268734	0.720607235142119	0.886466408268734	0.776970284237726
CHEMBL2363265	0.65394992213174	0.79386556204738	0.694016757653121	0.689416307598126	0.666892366892367
CHEMBL1024480	0.752592592592593	0.488888888888889	0.459259259259259	0.648888888888889	0.442962962962963
CHEMBL2363541	0.492015392015392	0.621428571428571	0.664309764309764	0.516738816738817	0.644035594035594
CHEMBL1614177	0.721319102353585	0.782074438970991	0.749863163656267	0.837575259989053	0.797810618500274
CHEMBL1804798	0.942369068839657	0.907609710550887	0.942381801205331	0.906468041762159	0.958110516934046
CHEMBL3111191	0.394927048260382	0.457205387205387	0.244118967452301	0.278563411896745	0.215521885521886
CHEMBL1031359	0.822222222222222	0.622222222222222	0.833333333333333	0.748333333333333	0.825
CHEMBL2363544	0.550938644688645	0.571538755362285	0.505836075689017	0.506197846271376	0.500903508256449
CHEMBL2363339	0.631349206349206	0.680820105820106	0.772685185185185	0.617857142857143	0.74292328042328
CHEMBL2363169	0.643256280756281	0.791472416472417	0.799656824656825	0.63753885003885	0.767191142191142
CHEMBL2363165	0.58578431372549	0.83308195072901	0.64297385620915	0.641465560583208	0.636060834590246
CHEMBL1738313	0.614113181504486	0.736040770823379	0.617421165790731	0.732205234379147	0.661620082815735
CHEMBL2363531	0.616345270890725	0.63031068258341	0.67877257422712	0.579074839302112	0.662982093663912
CHEMBL2363621	0.639129389129389	0.641329966329966	0.68013468013468	0.623893698893699	0.656180856180856
CHEMBL1614265	0.807820855614973	0.651255199049317	0.717171717171717	0.62979055258467	0.716763220439691
CHEMBL1738092	0.461041824137062	0.544162572436382	0.459967876039305	0.701417233560091	0.447365520282187
CHEMBL1614380	0.790403169814935	0.884723120017238	0.923388158682276	0.821562642150877	0.865030285618521
CHEMBL2363420	0.647649572649573	0.836538461538462	0.673076923076923	0.722435897435897	0.666346153846154
CHEMBL2354307	0.640023146421834	0.616217686849352	0.532748043740661	0.460865422063125	0.46739779528951
CHEMBL2363375	0.611721611721612	0.665567765567766	0.594505494505495	0.631868131868132	0.627472527472527
CHEMBL1738423	0.656320558526441	0.611315073815074	0.513955733808675	0.659646807440925	0.484204602586956
CHEMBL3214828	0.780563032187746	0.828957830880028	0.826721369146998	0.773770216561979	0.847650127650128
CHEMBL2114883	0.620978429608461	0.657877647235232	0.506806625034179	0.583274897903381	0.571706336605717
CHEMBL1614408	0.675361811391223	0.59317615935263	0.517116013071895	0.53057500778089	0.54973544973545
CHEMBL872182	0.976359560918384	0.970150934305346	0.960066825875649	0.904453661806603	0.95543719624602
CHEMBL2363299	0.605449452508276	0.766015901310019	0.641841383017854	0.639956992898169	0.606516141810259
CHEMBL1820680	0.756613756613757	0.755026455026455	0.713756613756614	0.661772486772487	0.71984126984127
CHEMBL663474	0.927363184079602	0.844112769485904	0.949253731343284	0.820729684908789	0.942786069651741
CHEMBL2363268	0.661469819254346	0.701529276705108	0.69405743624094	0.705817633630933	0.672663917852537
CHEMBL2363393	0.582745098039216	0.682990196078431	0.688186274509804	0.583877995642701	0.664270152505447
CHEMBL1737862	0.874290987516071	0.920881340467007	0.885908921239268	0.894662187383352	0.908412342914023
CHEMBL2363642	0.577790727790728	0.714110334110334	0.664154364154364	0.626521626521626	0.691155141155141
CHEMBL3215144	0.486519315013939	0.695957785742732	0.747371565113501	0.616109119872561	0.672301871764237
CHEMBL2363467	0.703823094894523	0.830947227375799	0.846048924620353	0.655884525527383	0.844440149797293
CHEMBL2363174	0.572359276329409	0.679197272304174	0.691730212764633	0.544658547708994	0.690557353369227
CHEMBL1614417	0.538766987110067	0.50079694329207	0.661015866668888	0.568464926164731	0.618341913663551
CHEMBL1614539	0.685526315789474	0.586549707602339	0.560672514619883	0.573684210526316	0.684429824561404
CHEMBL1738684	0.73522969522337	0.733131085966844	0.765344250005856	0.714104996837445	0.715793645215952
CHEMBL3214981	0.771313733826864	0.7312466653328	0.728633953581433	0.663768840869681	0.752451814058957
CHEMBL2363321	0.592995169082126	0.703266620657925	0.65178283873936	0.555152979066023	0.61130664826317
CHEMBL3111197	0.59073476702509	0.377992831541219	0.349426523297491	0.338064516129032	0.412437275985663
CHEMBL2114718	0.417645074224022	0.405645524066577	0.537417528864897	0.474964387464387	0.50978032688559
CHEMBL1963857	0.77488239058112	0.907538351277008	0.857583701503847	0.843073811313376	0.842669631235874
CHEMBL2363453	0.637121212121212	0.743181818181818	0.683333333333333	0.647159090909091	0.708712121212121
CHEMBL2363176	0.565820839234152	0.608175128105469	0.674995848950957	0.560889560502564	0.640192374132003
CHEMBL1963849	0.694234483917024	0.59608843537415	0.649029982363316	0.719870664315109	0.631057361216091
CHEMBL1614210	0.500200758538859	0.592186202220527	0.472199232985846	0.568900118654123	0.481812547673532
CHEMBL2354260	0.525589547328678	0.479305718436153	0.608161564683304	0.540583410148628	0.572088941654159
CHEMBL2363449	0.588130686517783	0.723468431210367	0.706440584505101	0.665817480011028	0.766506754893852
CHEMBL1614482	0.703852657004831	0.850525189786059	0.79884265010352	0.8085983436853	0.804380262249828
CHEMBL1614220	0.675492207648005	0.690522155377228	0.702751092787325	0.788076761265167	0.722666827920451
CHEMBL2114914	0.58907919777485	0.788089225589226	0.699378293807642	0.560516853315766	0.660778985507246
CHEMBL2363438	0.611383423561732	0.620494808500323	0.690620062127415	0.627211437459599	0.659053252711341
CHEMBL1613956	0.449364593464763	0.635620494703687	0.591851084211016	0.616031566371125	0.550066311101965
CHEMBL1613806	0.682215219421102	0.836025401613637	0.807964638846992	0.821354832531303	0.77556800497977
CHEMBL1614450	0.490162037037037	0.580632716049383	0.51929012345679	0.448688271604938	0.465663580246914
CHEMBL1167052	0.818037518037518	0.955627705627706	0.922727272727273	0.968398268398268	0.915800865800866
CHEMBL1002712	0.954609500805153	0.946407779016475	0.928442028985507	0.948270469466122	0.946960547504026
CHEMBL3111194	0.564078087375301	0.654932060543516	0.552352081183351	0.642565359477124	0.63452442380461
CHEMBL1613859	0.660994651483782	0.84441856452726	0.680253623188406	0.65139751552795	0.63440303657695
CHEMBL2363146	0.562732919254658	0.639500421746799	0.62611762901618	0.561160953914577	0.652198834445211
CHEMBL2363395	0.628826033337312	0.634412438021461	0.737904501513524	0.553754226836934	0.671222356034386
CHEMBL938648	0.804724596391263	0.733143399810066	0.730927508705286	0.767410572966129	0.69238683127572
CHEMBL1613980	0.528017984725302	0.508893816210889	0.640289069557362	0.551465878295147	0.527568366592757
CHEMBL2363581	0.709197235513025	0.773421347982752	0.732131254061079	0.670594837261504	0.740585681375155
CHEMBL3215132	0.673503947495883	0.678095938680616	0.637799997578223	0.714604221156641	0.616923072265814
CHEMBL1614267	0.632548792397277	0.653346961680295	0.637816112058536	0.653396154911306	0.618338143338143
CHEMBL2363277	0.633891612200436	0.647949735449735	0.70583372237784	0.591828120136944	0.677781668222845
CHEMBL3111192	0.713518966908797	0.682956685499058	0.463666935700834	0.484665052461663	0.299085283831047
CHEMBL3111198	0.513480392156863	0.582573441563005	0.599831330381615	0.757730690842645	0.637140698573336
CHEMBL2363153	0.6574022357481	0.714239964991845	0.665639097744361	0.659122409197597	0.686763336913713
CHEMBL2363197	0.62456910373577	0.698452781786115	0.644189915023248	0.515371973705307	0.634970739137406
CHEMBL2363371	0.511418128654971	0.688961988304094	0.647719298245614	0.57140350877193	0.621330409356725
CHEMBL2363734	0.589501348324878	0.734958940841294	0.66719990249402	0.716848728613435	0.69623992565169
CHEMBL1614478	0.743518518518518	0.831415343915344	0.831040564373898	0.795756172839506	0.785703262786596
CHEMBL2363336	0.602392977392977	0.689664502164502	0.646284271284271	0.741161616161616	0.658008658008658
CHEMBL3111195	0.602105669854149	0.610396342445024	0.553015229080138	0.659609131008725	0.569168356997972
CHEMBL2363278	0.603033625730994	0.645166301169591	0.698661366959064	0.562120796783626	0.681702302631579
CHEMBL2363351	0.532924836601307	0.653267973856209	0.64468954248366	0.61593137254902	0.63047385620915
CHEMBL2363391	0.629082132178107	0.68520279170434	0.700881505835066	0.604305257865629	0.703427463489383
CHEMBL2363326	0.590114379084967	0.659402852049911	0.633830956625074	0.475965537730244	0.638666072489602
CHEMBL2363328	0.51358024691358	0.571450617283951	0.712654320987654	0.56033950617284	0.667283950617284
CHEMBL2363330	0.516955266955267	0.614688552188552	0.676001082251082	0.487012987012987	0.629449254449254
CHEMBL2363364	0.641755960862544	0.707028118172319	0.652144485608435	0.678009879357842	0.682260853044552
CHEMBL2363333	0.534063322298616	0.651065274594686	0.673762838468721	0.519955861132332	0.682573635514812
CHEMBL2363148	0.582880850667412	0.662351445948284	0.672911592872067	0.553053592579284	0.63141959782276
CHEMBL2363264	0.560846560846561	0.641534391534392	0.597883597883598	0.607142857142857	0.646825396825397
CHEMBL2363283	0.676911269558328	0.707115270350564	0.548435333729451	0.607746583481878	0.620080709051297
CHEMBL2363660	0.626224982746722	0.696580016869872	0.622061191626409	0.625795567824553	0.645878383559543
CHEMBL2363307	0.512472907209749	0.563729399255715	0.603026724737251	0.594257350836298	0.587226004989163
CHEMBL2363247	0.591781058447725	0.664862298195631	0.704921004921005	0.591530691530692	0.710265043598377
CHEMBL2363465	0.665804002760525	0.689755578559926	0.740036231884058	0.661775362318841	0.729196572348746
CHEMBL2363225	0.580149090675407	0.634605745132061	0.689705031810295	0.563774821669559	0.654411670201144
CHEMBL2363468	0.621468367889421	0.652483458062405	0.630632028789924	0.614064654643602	0.675639308060361
CHEMBL2114826	0.62024616615666	0.768435752347789	0.717711850620801	0.687447790264148	0.752961006471809
CHEMBL3215266	0.661439387034137	0.615827125507191	0.543082175321716	0.466748148700569	0.465738876321321
CHEMBL2363731	0.618807508281192	0.713880505459453	0.632427922954239	0.591900380321433	0.675151515151515
CHEMBL1614479	0.898274124464601	0.774250440917108	0.782690854119426	0.763416477702192	0.703325774754346
CHEMBL3214782	0.592039370660497	0.598378897556633	0.5459692286068	0.45415083136462	0.677431068006653
CHEMBL1614273	0.481227556156562	0.526297047554654	0.545237397641049	0.623266095710315	0.511885282848772
CHEMBL1794400	0.718799823633157	0.718966490299824	0.725128747795414	0.756201058201058	0.767395061728395
CHEMBL2363728	0.587488328664799	0.676887684898521	0.733551403017347	0.520883704358937	0.689496412600128
CHEMBL2363568	0.589124033860876	0.689669979143663	0.701130229419703	0.607850263771316	0.689623972518709
CHEMBL2363353	0.654201838180166	0.616213516445715	0.722101823185414	0.573350797809002	0.692733058135535
CHEMBL2363230	0.575146458479792	0.619682015515349	0.58951788951789	0.586905995239329	0.614531764531765
CHEMBL1670561	0.850361842349672	0.523358149625898	0.853606163950992	0.646600205068765	0.841189844638121
CHEMBL1614518	0.527849346931473	0.623152621220254	0.496117373412059	0.577223116836643	0.547611379495437
CHEMBL2363739	0.562480404585668	0.627509916983601	0.585817691080849	0.595189410978885	0.568887253097779
CHEMBL2363558	0.624846681096681	0.620084776334776	0.66656746031746	0.509920634920635	0.626713564213564
CHEMBL2363322	0.598141346121144	0.582833384348536	0.677738666122505	0.56181512090603	0.652023603033704
CHEMBL2363753	0.570593149540518	0.679128376496798	0.652908312447786	0.632562308549151	0.626331453634085
CHEMBL2363348	0.569331983805668	0.725381599394757	0.671394230769231	0.678055734470208	0.697428868645974
CHEMBL1614321	0.442762348984238	0.550329359129959	0.558353283675623	0.47349618841373	0.542183432093477
CHEMBL2363337	0.618333333333333	0.68	0.68	0.582407407407407	0.685
CHEMBL2363228	0.731013431013431	0.665079365079365	0.751770451770452	0.591941391941392	0.719169719169719
CHEMBL2363504	0.646944841364346	0.585683760683761	0.632779762377286	0.511156029213305	0.626211134926305
CHEMBL2363664	0.651477688977689	0.788954101454101	0.748346098346098	0.66968586968587	0.771101121101121
CHEMBL2363269	0.463201871657754	0.63156862745098	0.638600713012478	0.581862108479756	0.651421886936593
CHEMBL1613893	0.708217626825287	0.734702778051639	0.859865041024461	0.782667575887038	0.776398884835738
CHEMBL1614345	0.501237535612536	0.516141381766382	0.655021367521368	0.568073361823362	0.663630698005698
CHEMBL2363442	0.633344238607397	0.674341253288622	0.722569827832986	0.621396147711937	0.716851374746112
CHEMBL2363317	0.617577597840756	0.678320400359874	0.756352017865176	0.699884727845254	0.723292606516291
CHEMBL2363432	0.538642697881828	0.637386058102171	0.678505421120511	0.490716331125538	0.64445236846132
CHEMBL1614376	0.218948558162268	0.543065738025415	0.427034457478006	0.349407380254154	0.517567815249267
CHEMBL2363403	0.494905354554477	0.591872130468622	0.60674121200437	0.573902705481653	0.634696427678884
CHEMBL1614355	0.560163033847244	0.327308169413433	0.678982810561758	0.5	0.367712209817473
CHEMBL2363593	0.550364758698092	0.584562949759028	0.646703967782399	0.546180761867036	0.632559252657292
CHEMBL2363414	0.61688479219439	0.675112385464553	0.680432029271039	0.59836014948244	0.712405693936267
CHEMBL1614226	0.763320684691652	0.748124411430863	0.728338417854547	0.757719654897074	0.700454563357789
CHEMBL2363444	0.653439153439153	0.742504409171076	0.681657848324515	0.640652557319224	0.728615520282187
CHEMBL1738246	0.767234993614304	0.790753512132822	0.761769418321143	0.793578311854174	0.74964820619993
CHEMBL2363697	0.689834921413869	0.778650199702831	0.719618588039641	0.627877969983233	0.777274090431985
CHEMBL2363725	0.53287037037037	0.639224763979666	0.664102214960058	0.549105846042121	0.647120098039216
CHEMBL2363572	0.691754541754542	0.732854182854183	0.729148629148629	0.675481925481925	0.711273911273911
CHEMBL2363189	0.588408521303258	0.627159333518983	0.600031328320802	0.512241251276339	0.577344982827439
CHEMBL2363799	0.661451268030215	0.75938316069895	0.665978465978466	0.75446556367609	0.716101442417232
CHEMBL2363628	0.458742088052433	0.587945419841972	0.547962892790479	0.514271328926501	0.551006624282486
CHEMBL2363489	0.623697000167588	0.702752639517345	0.645684598625775	0.519737724149489	0.66872381431205
CHEMBL2363426	0.519322344322344	0.644871794871795	0.679136141636142	0.5248778998779	0.694856532356532
CHEMBL1738575	0.605659020364903	0.793509475862417	0.703548085901027	0.772543341660989	0.723239205592147
CHEMBL2363836	0.586798484166905	0.650513911040227	0.592009842009842	0.632061505745716	0.585436688068267
CHEMBL2363789	0.694434880975802	0.666216002331226	0.678128684143962	0.641361297203268	0.745328394515701
CHEMBL2363553	0.608426546507042	0.691371544119222	0.70194197787077	0.558964341472081	0.675650838383037
CHEMBL2363332	0.581070476436188	0.591677378188117	0.641941480539584	0.577429135031206	0.600348527568922
CHEMBL1614308	0.454414935151533	0.556347273738718	0.500639734133335	0.532242767540951	0.529614039657731
CHEMBL2363809	0.567521367521368	0.67031857031857	0.668598068598069	0.576678876678877	0.714552114552115
CHEMBL2363207	0.604960219478738	0.747566529492455	0.708965706447188	0.666902606310014	0.71761316872428
CHEMBL2114827	0.241602067183463	0.273255813953488	0.268881506090808	0.280361757105943	0.303580657069029
CHEMBL1964046	0.531632080441604	0.609059415011796	0.648617696236744	0.538682745825603	0.640326164135688
CHEMBL1614462	0.360499889862471	0.44934023976912	0.402875794573611	0.510832992831812	0.381268941272876
CHEMBL2363671	0.623906432748538	0.633005847953216	0.679559454191033	0.575586744639376	0.641711500974659
CHEMBL2363290	0.562979320874058	0.698621164410638	0.702549107812266	0.603885003885004	0.7231893837157
CHEMBL2363459	0.662434530490086	0.729201739618406	0.666000280583614	0.607136176580621	0.728862701084923
CHEMBL2363611	0.721031746031746	0.753769841269841	0.726984126984127	0.625	0.74484126984127
CHEMBL2363743	0.614624669312169	0.678798776455026	0.687272652116402	0.628740906084656	0.72182953042328
CHEMBL1613821	0.57724171539961	0.680349377717799	0.599677612835508	0.66359649122807	0.494309491677913
CHEMBL2363341	0.605313970831212	0.675736587805553	0.65859970170315	0.612385571006261	0.646360153256705
CHEMBL1614465	0.476130351130351	0.765632515632516	0.60266354016354	0.624864718614719	0.64983164983165
CHEMBL1614083	0.570148953301127	0.829339199447895	0.684595698182655	0.601774212100299	0.60121635610766
CHEMBL2363366	0.536589105339105	0.663600288600289	0.68248556998557	0.590561868686869	0.690011724386724
CHEMBL2363766	0.528643578643579	0.684423426814731	0.665894974590627	0.56041470606688	0.667041533345881
CHEMBL2363464	0.496258767929249	0.606381985672604	0.673537042667477	0.551443967931382	0.672055015922293
CHEMBL1963899	0.694600963552576	0.731521435553694	0.690319089512638	0.663835358190197	0.730177349532188
CHEMBL3214801	0.633330430744224	0.613480867791213	0.69899114295666	0.581915211225556	0.699712643678161
CHEMBL1614512	0.703951603951604	0.72173206910049	0.704543409806568	0.72820688083846	0.761682177471651
CHEMBL648337	0.896560846560847	0.929301485551486	0.858137464387464	0.800900488400488	0.859340659340659
CHEMBL2363213	0.706608391608392	0.668269230769231	0.688383838383838	0.576596736596737	0.678040015540016
CHEMBL2363556	0.600999245852187	0.686538461538462	0.735426093514329	0.553148567119155	0.765780542986425
CHEMBL2363142	0.568562156797451	0.646289984525279	0.673853923853924	0.487995337995338	0.651079639314933
CHEMBL2363788	0.669783885776533	0.717989174836601	0.680132226501712	0.612136729691877	0.724842923280423
CHEMBL2363560	0.596908939014202	0.713374121578456	0.680094844955526	0.548157157599882	0.666853408029879
CHEMBL2155446	1	1	1	1	1
CHEMBL2363790	0.618245222431078	0.758299655388471	0.66921718358396	0.582580670426065	0.691804902882206
CHEMBL2363481	0.705996810207337	0.75297632192369	0.745119003803214	0.732425469267574	0.779957673905042
CHEMBL2114715	0.61507045766305	0.649208130689612	0.643022820800599	0.69717857588228	0.729074697593216
CHEMBL2363433	0.634348544973545	0.755509259259259	0.691481481481482	0.650297619047619	0.725939153439153
CHEMBL2363609	0.604816071727836	0.680985000837942	0.700194821518351	0.654610775934305	0.666802832244009
CHEMBL3214965	0.655090250678486	0.748523701955074	0.624152227093404	0.713731779908251	0.740558294479863
CHEMBL1169087	0.749925328554361	0.933131720430108	0.804062126642772	0.938764080901178	0.753317545656255
CHEMBL3214907	0.459458946402007	0.575744397389302	0.541152252721778	0.590832818487954	0.484907120743034
CHEMBL687330	0.947718253968254	0.94781746031746	0.921031746031746	0.91656746031746	0.942857142857143
CHEMBL1614008	0.592648672372175	0.674454338611506	0.648878956223123	0.676477676526185	0.631757812349614
CHEMBL2363324	0.571014492753623	0.631159420289855	0.577865612648221	0.520223978919631	0.621212121212121
CHEMBL2363185	0.623716153127918	0.68703314659197	0.644899626517274	0.61671335200747	0.664098972922502
CHEMBL2363220	0.561853832442068	0.706617647058824	0.708303624480095	0.564297385620915	0.670811051693405
CHEMBL2363555	0.640127987954075	0.661961227178618	0.665631469979296	0.619424054206663	0.671089779785432
CHEMBL2363437	0.53296485260771	0.666836734693878	0.664739229024943	0.638038548752834	0.624546485260771
CHEMBL2363243	0.658370489446341	0.739755607596165	0.763818876628474	0.638739492648161	0.792064689123513
CHEMBL2363612	0.610348583877996	0.7202119231531	0.798692810457516	0.622905525846702	0.749366211130917
CHEMBL2363140	0.729565580618212	0.730818713450292	0.74	0.626140350877193	0.749248120300752
CHEMBL3215216	0.596818262188596	0.687387513144793	0.800913388611258	0.668474831793182	0.723628986478312
CHEMBL2363239	0.605151214526214	0.774400252525252	0.689977152477153	0.679342532467533	0.7378848003848
CHEMBL2363434	0.63700990367657	0.72022792022792	0.702191018857686	0.612040428707095	0.694017094017094
CHEMBL2114717	0.374215765900972	0.56975195837821	0.530695040344651	0.510576272283725	0.526883191788642
CHEMBL2363688	0.604812911386187	0.767865256550601	0.69898021837677	0.706491744207261	0.75149862111069
CHEMBL2363152	0.647412854030501	0.630882352941176	0.706998910675381	0.622903050108933	0.692347494553377
CHEMBL1738040	0.502433609750683	0.480782090538188	0.441865993085505	0.404775982824763	0.467889292279536
CHEMBL2363141	0.632153912395848	0.780852883675464	0.785448086859377	0.61638126658288	0.812617825722664
CHEMBL2363803	0.700330687830688	0.780621693121693	0.699052028218695	0.669466490299824	0.734281305114638
CHEMBL2363623	0.680777724299992	0.733840114002057	0.713690627860668	0.625301284410596	0.749744722214358
CHEMBL2363211	0.717083842083842	0.770070207570208	0.742673992673993	0.636294261294261	0.736365486365486
CHEMBL2363594	0.613975893387658	0.78534646181705	0.669467787114846	0.644986277339219	0.747976968565204
CHEMBL2363236	0.691125541125541	0.742234514456737	0.747923681257015	0.751290684624018	0.715400032066699
CHEMBL2363549	0.600322671156005	0.64263468013468	0.661195286195286	0.660255331088664	0.623961840628507
CHEMBL2363387	0.557263714685004	0.621476363605299	0.648351167591547	0.5067295412123	0.681764789710817
CHEMBL2363180	0.615843989769821	0.644850154108466	0.698269558659584	0.541960620368549	0.753957308675979
CHEMBL2363577	0.634085213032581	0.745363408521303	0.655012531328321	0.668838763575606	0.683542188805347
CHEMBL2363252	0.624151882975412	0.61750700280112	0.659601618425148	0.593915343915344	0.631263616557734
CHEMBL2363630	0.625062656641604	0.745530492898914	0.693483709273183	0.614313561681983	0.688341223428943
CHEMBL2363216	0.612282876950419	0.687181734368998	0.66753446983776	0.63426115126026	0.659826062417863
CHEMBL2363535	0.608123490125715	0.712727360681115	0.691578492940238	0.647833916760484	0.722063660990712
CHEMBL2363368	0.654856663263096	0.780212491104304	0.700870617902782	0.642027522509979	0.70854412265231
CHEMBL2363618	0.577097505668934	0.666918785057883	0.721613557703783	0.642090344909894	0.685850041771094
CHEMBL2363774	0.721169177316104	0.709817710192523	0.695915930923427	0.65434941259529	0.713637229004545
CHEMBL1614503	0.694687818045046	0.70905188886073	0.657672905880791	0.722856803800651	0.6656207635897
CHEMBL2363389	0.636914910891893	0.730389112166606	0.661836256241627	0.56093756343117	0.678421223561889
CHEMBL2363477	0.601761542551016	0.60989687700214	0.675380775819372	0.522757943810575	0.649519827151406
CHEMBL2363834	0.619708994708995	0.668954583428268	0.675248727880307	0.616190096453254	0.705516948938002
CHEMBL1794367	0.886925770308123	0.868074229691877	0.86156162464986	0.889768907563025	0.885679271708683
CHEMBL2363440	0.666955266955267	0.76465848965849	0.650060125060125	0.67531265031265	0.658982683982684
CHEMBL2363363	0.57447676208064	0.587503847337642	0.671194983071714	0.575881040320098	0.653131732840874
CHEMBL2363369	0.607477284809821	0.700889476906223	0.629139782997439	0.577780899102669	0.656657282554412
CHEMBL2363435	0.683511586452763	0.707605466428996	0.790136660724896	0.581075460487225	0.783036244800951
CHEMBL2363223	0.575313140019022	0.627570033452386	0.667698967698968	0.632909465262406	0.65737639267051
CHEMBL2363851	0.629923574368019	0.681327160493827	0.766607877718989	0.65433935920047	0.766920194003527
CHEMBL2363575	0.680897031019241	0.777546549552416	0.644139502523078	0.68954946706291	0.696977997108354
CHEMBL2363443	0.670559764309764	0.713609307359307	0.620746151996152	0.559132996632997	0.63343253968254
CHEMBL2363273	0.608992704826038	0.651613355780022	0.663005050505051	0.557379349046016	0.692817059483726
CHEMBL2363655	0.568715385211549	0.599273027342081	0.685173344700199	0.528530849183023	0.663256027386462
CHEMBL2363242	0.628086419753086	0.824537037037037	0.735030864197531	0.644444444444444	0.768287037037037
CHEMBL2363367	0.49031363893024	0.667895214140273	0.625282754136509	0.459988364731448	0.593349075167257
CHEMBL2363561	0.721451355661882	0.756020733652313	0.736423444976076	0.682356459330144	0.750438596491228
CHEMBL2363771	0.650965608465608	0.734722222222222	0.657905643738977	0.642883597883598	0.700458553791887
CHEMBL2363238	0.622657952069717	0.715522875816993	0.671323529411765	0.549918300653595	0.667456427015251
CHEMBL1613904	0.595366972806736	0.719795181785355	0.651354734390809	0.63447699307169	0.655401169551796
CHEMBL2363507	0.522425538262642	0.623704259262329	0.645551832391953	0.556237879767292	0.644025887804168
CHEMBL2363727	0.618345342522974	0.741452589807853	0.659769214703425	0.64436873433584	0.664755639097744
CHEMBL2363480	0.614666154923508	0.746628555268261	0.634599897651368	0.659908290239173	0.607259346046111
CHEMBL2363187	0.564855072463768	0.675905797101449	0.623136645962733	0.680784161490683	0.622217908902691
CHEMBL2363659	0.584245193804017	0.732027640115875	0.675713747037276	0.62785349182408	0.688364277334866
CHEMBL2363327	0.595284780578898	0.701332755324352	0.694613400915922	0.587751767373616	0.733444488906674
CHEMBL2363154	0.545050102718769	0.68546338185156	0.420621066089693	0.404445591834951	0.4700558396713
CHEMBL2363469	0.568838763575606	0.673266499582289	0.69209133945976	0.60646059593428	0.672514619883041
CHEMBL2363275	0.524116161616162	0.58044733044733	0.655663780663781	0.581060606060606	0.602308802308802
CHEMBL2363248	0.5896627881922	0.667918192918193	0.685493428140487	0.562132801838684	0.682553149464914
CHEMBL2363374	0.625276633089133	0.758108211233211	0.670730311355311	0.635769612332112	0.683302808302808
CHEMBL2363397	0.677786411119744	0.789032777921667	0.674599269043713	0.630664191775303	0.661301044634378
CHEMBL2363811	0.663829944002358	0.78360472541507	0.801872728165832	0.700024560369388	0.801312751743786
CHEMBL2363208	0.555114638447972	0.601311728395062	0.685460758377425	0.567206790123457	0.691820987654321
CHEMBL2363212	0.63397633744856	0.641033950617284	0.674984567901235	0.592109053497942	0.666291152263375
CHEMBL2363373	0.580097920810836	0.635617044104896	0.620103959458179	0.564716903112044	0.619960962831807
CHEMBL2363657	0.593479984927353	0.633955956324377	0.627268929900509	0.572701056253688	0.644102242786453
CHEMBL2363160	0.524351408825093	0.61542663476874	0.655353535353535	0.535798777246146	0.650963583200425
CHEMBL2363846	0.516127214170692	0.579329710144928	0.657316827697263	0.53395229468599	0.663825483091787
CHEMBL3215276	0.50176656920078	0.829251949317739	0.880116959064328	0.767665692007797	0.873416179337232
CHEMBL2363740	0.729774597830153	0.804176019453797	0.851243920688365	0.709712869435092	0.855429292929293
CHEMBL2363218	0.637147880594733	0.727482274586248	0.687734706455682	0.561126877651645	0.715281241638956
CHEMBL2363224	0.655768506232903	0.741683457008534	0.644750765803397	0.629553458810425	0.661169263026848
CHEMBL2363529	0.538383838383838	0.626233766233766	0.730668590668591	0.56986050986051	0.72047138047138
CHEMBL2363713	0.683585164835165	0.78464590964591	0.729204822954823	0.689056776556777	0.712263431013431
CHEMBL2363820	0.561240440845704	0.683949055330634	0.594516606687659	0.534085882441146	0.625923114409957
CHEMBL2363314	0.511622435535479	0.686492251709643	0.672705314009662	0.617620302402911	0.68324549846289
CHEMBL2363635	0.663539702811733	0.706966297232672	0.720281656014187	0.65648647709403	0.770205442756072
CHEMBL2363352	0.6391044221479	0.709791898922334	0.592670011148272	0.675279635823114	0.655840765514679
CHEMBL2363631	0.62127849002849	0.767165242165242	0.743625356125356	0.66292735042735	0.753952991452991
CHEMBL2363221	0.671620046620047	0.679768842268842	0.769803807303807	0.709200984200984	0.738458300958301
CHEMBL2363178	0.716688681688682	0.765078995078995	0.763969178969179	0.684799274799275	0.786678321678322
CHEMBL2363546	0.709565307604523	0.79471742400664	0.711367880485528	0.60883195870941	0.709464804440295
CHEMBL2363343	0.635623313884183	0.767785837351055	0.749565410434976	0.687653892001718	0.747164429773125
CHEMBL2363210	0.628918824839877	0.667649679754943	0.644808897243108	0.582265037593985	0.654192425508215
CHEMBL2363452	0.599735123762584	0.718742927552996	0.657943632772008	0.56013431013431	0.67459269690391
CHEMBL2363171	0.547067901234568	0.743248456790123	0.712686191626409	0.518904320987654	0.737536902844874
CHEMBL2363445	0.64141977303742	0.798205307764131	0.727695180636357	0.67789359333477	0.769531530560942
CHEMBL2363319	0.591889392964662	0.585722355435617	0.723985559111007	0.558806751459081	0.727489953296405
CHEMBL2363559	0.642361111111111	0.757656695156695	0.722845441595442	0.689814814814815	0.728187321937322
CHEMBL2363796	0.533150382660187	0.712740908329144	0.660338109602815	0.580198033629406	0.621160829003966
CHEMBL2363214	0.647440906187036	0.73859126984127	0.664325642537717	0.606313270922404	0.630973880780382
CHEMBL2363377	0.622211779448622	0.773922551476731	0.680989237800383	0.610087105017446	0.722588333579046
CHEMBL2363370	0.524157509157509	0.636654456654457	0.615634920634921	0.595274725274725	0.607594627594628
CHEMBL2363454	0.600831851709045	0.722527115509572	0.680221208291384	0.637169133660362	0.677901305971481
CHEMBL1614231	0.599861111111111	0.696825396825397	0.595621693121693	0.623346560846561	0.634808201058201
CHEMBL2363425	0.58808585635211	0.709685309530511	0.7258522866882	0.558785108939908	0.759369234137036
CHEMBL2363831	0.646939571150097	0.670599415204678	0.721179337231969	0.694312865497076	0.694502923976608
CHEMBL1614216	0.598350402948104	0.723159178413694	0.6263490208482	0.695649555255467	0.647805088691788
CHEMBL2363644	0.520415567829361	0.644204773515118	0.706960823340134	0.611152576669818	0.729029830322934
CHEMBL2363166	0.626864801864802	0.767689717689718	0.721451696451696	0.641174566174566	0.748109298109298
CHEMBL2363446	0.611096746390864	0.752057746175393	0.749612152553329	0.628781512605042	0.746776018099548
CHEMBL2363470	0.640170697908793	0.669957797933988	0.610333207357017	0.539266817838246	0.675629881582263
CHEMBL1613814	0.689880689026116	0.794901319736402	0.814810001759027	0.763914458854489	0.837146094784775
CHEMBL2363645	0.63435910494734	0.683045712457477	0.678019692725575	0.528644558056323	0.692745163333399
CHEMBL1738021	0.552906976744186	0.718251661129568	0.745397286821705	0.758672480620155	0.771234772978959
CHEMBL2363516	0.691170323928945	0.697565308254963	0.762925809822361	0.627241379310345	0.736039707419018
CHEMBL1614147	0.63671834625323	0.773229974160207	0.860981912144703	0.705374677002584	0.684186046511628
CHEMBL2363492	0.708576998050682	0.723405736563631	0.715074723846654	0.711953494848232	0.756045205606609
CHEMBL2363696	0.6645813881108	0.790600684718332	0.736788048552754	0.547556800497977	0.743557422969188
CHEMBL1614486	0.602823281516463	0.731992407844681	0.681547072456163	0.720758723599633	0.69777004350868
CHEMBL2363847	0.695086027075274	0.75810246105945	0.767687907472854	0.666244050652653	0.778980875755069
CHEMBL2363719	0.584289321789322	0.620652958152958	0.586586099086099	0.493518518518519	0.606180856180856
CHEMBL2363634	0.61390716374269	0.751476202079272	0.660920240415855	0.566254467186485	0.66029077322937
CHEMBL2363569	0.554666820560172	0.639400584795322	0.613665743305633	0.58872730070791	0.626546629732225
CHEMBL2363294	0.608822403230298	0.727119883040936	0.572004664438875	0.593887496519075	0.604949874686717
CHEMBL2363616	0.603284950343774	0.71811815635345	0.737751464222053	0.57843137254902	0.789393939393939
CHEMBL2363601	0.565191303794245	0.685224089635854	0.689144066717596	0.596818500127324	0.641625286478228
CHEMBL2363514	0.716514719848053	0.772986704653371	0.801699905033238	0.723281101614435	0.844050332383666
CHEMBL2363748	0.533866202384721	0.751018254721958	0.676147515036404	0.547034926664556	0.659945130315501
CHEMBL2363747	0.632747807747808	0.778038628038628	0.707837995337995	0.622872266622267	0.700153318903319
CHEMBL2363457	0.614318783068783	0.742146882907753	0.643410685530251	0.621749194847021	0.650319185645273
CHEMBL1613949	0.770096548832181	0.910071495128966	0.845244240646539	0.865614015614016	0.865925751557935
CHEMBL2363767	0.600163412193487	0.738499178348802	0.766366465614586	0.602022455405914	0.778810579562459
CHEMBL2363793	0.593027560674619	0.729116961469903	0.692767036884684	0.677622377622378	0.685163855752091
CHEMBL2363692	0.595480080921257	0.725484749455338	0.611988017429194	0.586448801742919	0.622670790538438
CHEMBL2363639	0.598625319693095	0.717444586530264	0.692988064791134	0.609548167092924	0.671248934356351
CHEMBL2363421	0.71640508470803	0.770497151282565	0.671143100315611	0.53928832582409	0.671252528054772
CHEMBL2363313	0.714195526695527	0.82718253968254	0.732016594516594	0.617334054834055	0.760768398268398
CHEMBL2363798	0.529330963154493	0.677184090419385	0.705622808563985	0.600086678027854	0.667094670035847
CHEMBL2363272	0.623266499582289	0.688648705096074	0.749822472848789	0.515413533834586	0.733208020050125
CHEMBL2363447	0.611499611499612	0.729020979020979	0.67005217005217	0.675491175491176	0.663225663225663
CHEMBL2363749	0.601113691090471	0.67156325249398	0.636260534915721	0.580119109047128	0.650488046095631
CHEMBL1738438	0.7	0.279210711768851	0.287138830162086	0.345665961945032	0.133333333333333
CHEMBL2114847	0.636469658324034	0.683260800255061	0.55952149423455	0.663956905255327	0.63748950528721
CHEMBL2363388	0.53192260783592	0.642154144445166	0.662103362753518	0.582898429399977	0.660187947587328
CHEMBL1614035	0.884399551066218	0.957331248997916	0.931647827481161	0.955607663940997	0.955096600929934
CHEMBL2363830	0.626184780132149	0.693041315409736	0.611291486291486	0.662457279562543	0.628637882585251
CHEMBL2363255	0.544671201814059	0.60153472016826	0.641506457655526	0.531289230668113	0.681417397877025
CHEMBL2363562	0.67062263501892	0.764976780185759	0.686743206054352	0.584778121775026	0.691799965600275
CHEMBL2363335	0.57083078958079	0.720662053995387	0.724329297245964	0.616478428978429	0.717198310948311
CHEMBL2363338	0.515512265512265	0.726767676767677	0.686868686868687	0.575108225108225	0.671404521404521
CHEMBL1614395	0.551678568345235	0.590675374008707	0.489352622685956	0.54662251328918	0.478967945634612
CHEMBL2363334	0.619514895330113	0.69252690906009	0.695336998898212	0.602513984235952	0.693271145859819
CHEMBL1614007	0.706736683207271	0.423174511409806	0.540060381236852	0.569966758202052	0.524195853607618
CHEMBL1614049	0.566731866288144	0.688506391603749	0.645675503524754	0.659025313994717	0.637259703948605
CHEMBL1034535	0.914419557897819	0.909317815839555	0.91269396867223	0.791271409749671	0.879982799004538
CHEMBL1613853	0.523713092573986	0.666399153637904	0.579797148705497	0.646360018192059	0.594004890226018
CHEMBL1614138	0.576251102292769	0.64239417989418	0.733862433862434	0.691247795414462	0.699283509700176
CHEMBL2363814	0.629492307844711	0.746044607566347	0.642266932152516	0.677423846176707	0.677507702061478
CHEMBL2363245	0.630647860911019	0.739814133235186	0.760396620922937	0.644610652505389	0.761242704663757
CHEMBL2363349	0.737315153981821	0.822132342965676	0.726826414326414	0.636268823768824	0.700532492199159
CHEMBL2363794	0.621317144394067	0.759332334332334	0.694574656113118	0.657335613104844	0.727146251184713
CHEMBL856174	0.582954382954383	0.34029029029029	0.147626197626198	0.572844272844273	0.421428571428571
CHEMBL1964005	0.727935222672065	0.840564164611352	0.789661377138691	0.830833604790048	0.780952270153722
CHEMBL1963983	0.750584604212055	0.730320745582184	0.804371822803195	0.7074709513435	0.726800411522634
CHEMBL2363215	0.574464284548318	0.683688860159448	0.67426364485188	0.612329314009986	0.644989930704217
CHEMBL1613890	0.563310990130437	0.694126330081147	0.582114261926484	0.577568014238495	0.605003456590705
CHEMBL1614363	0.740380635685073	0.712717523656636	0.682159101457347	0.658531404764635	0.700036583834313
CHEMBL1022010	0.87868605408928	0.92006761159987	0.870499348321929	0.834371945259042	0.890395894428152
CHEMBL1613962	0.493408913490881	0.601863778298204	0.602501301066875	0.377414366143874	0.575269971376529
CHEMBL1614244	0.56572246588694	0.630198586744639	0.586555799220273	0.575606725146199	0.57734649122807
CHEMBL2363764	0.58032293377121	0.719900217814567	0.709528143343494	0.705434288860318	0.738991696722509
CHEMBL1614405	0.730603655603656	0.8004551004551	0.775575350575351	0.730686905686906	0.763817663817664
CHEMBL1613926	0.493265700483092	0.470207729468599	0.639135265700483	0.616743961352657	0.637850241545894
CHEMBL1614492	0.625146198830409	0.711198830409357	0.625009746588694	0.657928849902534	0.644922027290448
CHEMBL2363716	0.591524665421724	0.653168767507003	0.702793339558045	0.576149626517274	0.686577964519141
CHEMBL1243972	0.825345120161438	0.822960236653825	0.572700727695224	0.822453448908457	0.703386611019385
CHEMBL1614053	0.554563492063492	0.692008377425044	0.662081128747795	0.67595348324515	0.64674823633157
CHEMBL829401	0.830315961894909	0.760501530238372	0.498676307886834	0.843570843570844	0.647175884017989
CHEMBL2363167	0.737272004059663	0.777866786033755	0.764951540359889	0.649979280650787	0.785659440378134
CHEMBL2363592	0.522616453989003	0.630874572051043	0.605897914721444	0.530552961925511	0.590517688556904
CHEMBL2363599	0.632470926299818	0.665948123872388	0.713711798564533	0.574151596416674	0.720251386450545
CHEMBL1613942	0.568718466918931	0.694353428505905	0.67630539789015	0.628501067824791	0.66578087375301
CHEMBL1614463	0.575397170943148	0.591770192344905	0.571697579240683	0.570690138937265	0.565007111343318
CHEMBL1614132	0.610053759646151	0.709387743898613	0.706985617039965	0.706240785181003	0.69057931802497
CHEMBL2363633	0.605227079683601	0.663882353556267	0.705452357626271	0.643679006179006	0.72282604673909
CHEMBL1963934	0.631659821454037	0.376557998916175	0.737995921394142	0.87836437447116	0.797253358432446
CHEMBL2363557	0.709401709401709	0.805478883861237	0.768902714932127	0.604544997486174	0.780253896430367
CHEMBL1614283	0.776447659931823	0.824559804197813	0.779704584003227	0.751337714573009	0.77489930883596
CHEMBL1614548	0.636406224947892	0.74516494308161	0.807008577841911	0.647005772005772	0.803285834535834
CHEMBL2363458	0.529398331137461	0.672059727711902	0.617039964866052	0.596381203337725	0.665559947299078
CHEMBL2354217	0.542657854787827	0.740408292755656	0.752727006265397	0.746318434708814	0.689159251427984
CHEMBL1738633	0.545492513790386	0.532434988179669	0.303719464144996	0.485736800630418	0.422663514578408
CHEMBL1613950	0.578989448554666	0.697739378174161	0.646719494273842	0.682017921691835	0.669114007972704
CHEMBL2114928	0.641004657407485	0.530503793705499	0.454222079430912	0.589479154786708	0.455237844889694
CHEMBL2363385	0.606193793306796	0.757524939800482	0.739474298491326	0.541789522826674	0.76328689370485
CHEMBL1614066	0.573296957671958	0.624927248677249	0.739966931216931	0.591335978835979	0.682189153439153
CHEMBL1614109	0.671944444444444	0.756524714601638	0.679945012252705	0.710078596617058	0.72811427888351
CHEMBL1737868	0.859178547550641	0.818539449353403	0.739846888684098	0.793905061346922	0.747397800304777
CHEMBL1614477	0.662898110661269	0.695907276203329	0.705970441595442	0.725979251012146	0.724466093117409
CHEMBL1794460	0.581330982450385	0.648603365954112	0.609394267976358	0.661658511471944	0.645741454510111
CHEMBL1614197	0.41977592977593	0.482695772695773	0.466597366597367	0.575421575421575	0.379427119427119
CHEMBL2354228	0.745180707022812	0.799087684175404	0.77188153065346	0.819164778813902	0.780478724338373
CHEMBL1737978	0.61331804299284	0.586251937936026	0.530348010487383	0.519093703646549	0.569709496422621
CHEMBL2363383	0.741835597352839	0.745297805642633	0.783279925693719	0.619676071055381	0.785116684082201
CHEMBL2363656	0.539341998581129	0.606523005979528	0.68657746239268	0.475029499486021	0.66936007832747
CHEMBL1614225	0.550335884628648	0.61023555702832	0.581289131535842	0.653713320078452	0.568464270191244
CHEMBL1738400	0.899979865096144	0.955065606228397	0.942712003758515	0.946409694956207	0.954413319238901
CHEMBL1738679	0.51827485380117	0.490204678362573	0.455190058479532	0.384868421052632	0.427777777777778
CHEMBL1738043	0.720661948990122	0.822600698457085	0.755918813478985	0.790955725810415	0.7599733838074
CHEMBL1738202	0.576593162748769	0.916826156299841	0.965311004784689	0.970674710491644	0.867644407461341
CHEMBL1614550	0.675406224312286	0.648600676721913	0.606081098303098	0.673123562284542	0.575751594629555
CHEMBL2363390	0.628446674098848	0.687743094264833	0.658671910483505	0.604386019241092	0.656561996779388
CHEMBL1737977	0.627071150097466	0.830952380952381	0.79838485101643	0.823099415204678	0.806516290726817
CHEMBL2114823	0.588688750862664	0.600849847185251	0.525073121035854	0.606217424167735	0.610714778665089
CHEMBL1243978	0.625860210290035	0.628846949022388	0.593390040758462	0.667903449701695	0.488939098588221
CHEMBL2363839	0.645714285714286	0.719556878306878	0.721812169312169	0.643505291005291	0.715092592592593
CHEMBL1243969	0.733085317460317	0.800595238095238	0.705208333333333	0.763144841269841	0.670486111111111
CHEMBL3215034	0.554107357095863	0.726987267309106	0.638252873563218	0.669015983590696	0.690770231046093
CHEMBL914418	0.961451247165533	0.933758503401361	0.924263038548753	0.838000755857899	0.930583900226757
CHEMBL1738197	0.64264167567784	0.771544248201103	0.642258511665576	0.725425727902599	0.654712131932485
CHEMBL698689	0.75008547008547	0.657606837606838	0.361282051282051	0.632008547008547	0.680854700854701
CHEMBL2363707	0.613100624865331	0.719471378294908	0.723105652517417	0.595676219205631	0.69388781153487
CHEMBL2363795	0.625665726817043	0.763874094959621	0.646651350598719	0.619456627680312	0.648353522695628
CHEMBL3215176	0.838750426975065	0.795893719806763	0.849777972966379	0.849632801444396	0.881946274337579
CHEMBL1614329	0.65137055867279	0.670364687149677	0.62641370724535	0.634108470974597	0.651776433318015
CHEMBL1676103	0.929307304019948	0.913355100448012	0.912039190942448	0.83745673184131	0.927525264043463
CHEMBL3214997	0.715113489759716	0.718777885287319	0.678730973050942	0.704008930011289	0.706615588435557
CHEMBL2363695	0.614893169743531	0.76536521041165	0.733287467033597	0.708743263387226	0.77836639529106
CHEMBL1794393	0.823789646596664	0.878223905416888	0.850206616873283	0.852143574073399	0.84082571100115
CHEMBL1243975	0.729366839122937	0.748521803399852	0.668157181571816	0.70960211874846	0.563993594481399
CHEMBL830839	0.985042735042735	1	1	0.987179487179487	1
CHEMBL2363315	0.6133442580811	0.6364337416969	0.650675348043769	0.581620134251713	0.613186521081258
CHEMBL1614117	0.429926088369071	0.694545971410006	0.591709307992203	0.525402046783626	0.559322205977908
CHEMBL1737951	0.775360766351458	0.843717986603625	0.691425950551615	0.801196808510638	0.708776595744681
CHEMBL1614065	0.44904214559387	0.605900383141762	0.49272030651341	0.515095785440613	0.531724137931034
CHEMBL1614393	0.536226851851852	0.70162037037037	0.738773148148148	0.669965277777778	0.709953703703704
CHEMBL1613907	0.189978403948992	0.328407376936789	0.577046482928836	0.424129302070478	0.543970245440834
CHEMBL1964010	0.613007669955289	0.490226106689793	0.474566432195852	0.42432747123521	0.508454124805072
CHEMBL2098499	0.779124329707685	0.757181953241067	0.735954280885575	0.705159793298243	0.768042712144345
CHEMBL1963940	0.950707574696545	0.986427696078431	0.963532913165266	0.980281279178338	0.980221463585434
CHEMBL2363737	0.532232854864434	0.58501860712387	0.594603934077618	0.550606060606061	0.641887293992557
CHEMBL641707	0.906597222222222	0.913888888888889	0.909722222222222	0.923090277777778	0.845833333333333
CHEMBL653167	0.954628592758492	0.95596926713948	0.952289411471942	0.739585666293393	0.95959935299241
CHEMBL2303649	0.804166666666667	0.837777777777778	0.7	0.804444444444444	0.674444444444444
CHEMBL830842	0.82645983303878	0.748370978634137	0.538110478899953	0.836185467764415	0.615807793439372
CHEMBL1963930	0.763297131718184	0.713060428849903	0.758033973823448	0.707825118351434	0.659976329713172
CHEMBL3215006	0.667120194620195	0.777003348503349	0.718485477485477	0.776290043290043	0.713894753394753
CHEMBL1614215	0.632807735742518	0.607539368843717	0.538868969195056	0.59019641288663	0.546228747098312
CHEMBL1963813	0.718572370468655	0.802356176388684	0.78530578898226	0.77432347207889	0.765511614002326
CHEMBL2114839	0.655670853462158	0.65786578099839	0.627439855072464	0.634749033816425	0.656523268921095
CHEMBL1738362	0.78004403004403	0.88028823028823	0.834691234691235	0.826738076738077	0.840652865652866
CHEMBL2114742	0.596356897241942	0.670104248064943	0.655407042367602	0.646939611292822	0.715728952700281
CHEMBL1613897	0.719664340884946	0.795619931614846	0.824386975703901	0.769277612865276	0.837768592901768
CHEMBL1614092	0.621511591478697	0.724580200501253	0.660363408521303	0.657368943191312	0.67109544695071
CHEMBL2354305	0.658457637600495	0.735250463821892	0.785700680272109	0.766672850958565	0.73395423623995
CHEMBL1738319	0.750326290071466	0.766579245154208	0.742092219727054	0.748088991112247	0.78862233483708
CHEMBL1034533	0.953261210567771	0.915918238615884	0.953755156393928	0.858950932489621	0.908649225039048
CHEMBL2363573	0.622665399493131	0.721670001333867	0.71983793517407	0.606611978124583	0.722004468454048
CHEMBL1243970	0.875292157597058	0.825015124016939	0.764926684527411	0.864052612373847	0.768187950719711
CHEMBL1738080	0.909992784992785	0.939650060360845	0.918330716124834	0.915451492044629	0.937050535702497
CHEMBL3214958	0.551164630325815	0.630729427736007	0.59109962406015	0.639542606516291	0.606733500417711
CHEMBL1613871	0.475939434129089	0.67801724137931	0.70999115826702	0.59210875331565	0.724171087533157
CHEMBL2114863	0.613598935069523	0.732286950816363	0.692363035304212	0.695731571908042	0.735548868195927
CHEMBL1614509	0.802795426537687	0.861428922671183	0.864272078039493	0.858871841021609	0.837487308801163
CHEMBL1613785	0.647099665290138	0.734142003973259	0.655041747451177	0.650237975830951	0.680471682458153
CHEMBL1738430	0.496664476707242	0.520741195366997	0.56556232001706	0.519960587316254	0.542705600795408
CHEMBL1243977	0.820229468599034	0.769412475134982	0.640693378800796	0.725696220517192	0.657676186416596
CHEMBL1738019	0.662140388101927	0.798068704799474	0.789039059231367	0.702666208435439	0.779856254856255
CHEMBL1738091	0.819587534524642	0.778095570862866	0.756065521946025	0.752652573957605	0.736132741006955
CHEMBL1614309	0.557409515302537	0.486707776696111	0.463909483980849	0.48182146073795	0.507892499778179
CHEMBL1963968	0.561830747331119	0.656643753628326	0.629767613881961	0.653527918881438	0.657541704782032
CHEMBL1243968	0.688840436459484	0.759544644068454	0.742169602883889	0.747902494331066	0.662876717638622
CHEMBL1963898	0.498706595955173	0.476816644772053	0.618333900971472	0.528129916151738	0.535732618109278
CHEMBL1614319	0.642812998405104	0.695274486721855	0.673499405078352	0.639625895546948	0.717791005291005
CHEMBL1738602	0.497732248594318	0.592139788691513	0.515955117679256	0.589943772702393	0.581086729362591
CHEMBL681296	0.411594202898551	0.681521739130435	0.240217391304348	0.385507246376812	0.0938405797101449
CHEMBL3214794	0.71212622900795	0.771031151246205	0.694639792704309	0.742808473883743	0.666304519852907
CHEMBL2114844	0.454389214089966	0.576195838470162	0.565852976163484	0.51035014548412	0.590356091645263
CHEMBL1794484	0.506070489380433	0.548943632313721	0.481420338026192	0.517723126809935	0.504366423933385
CHEMBL1614295	0.37414353825266	0.3860629598055	0.448817530232705	0.20862934545799	0.555618704808816
CHEMBL1738422	0.526952609269682	0.671380260811155	0.743594376114701	0.7601151182452	0.73017858383712
CHEMBL1614072	0.68419569050374	0.785762415545697	0.758717195543821	0.741886277637052	0.765624809200661
CHEMBL1737979	0.468379817064028	0.600127455390613	0.538336582196231	0.563434048083171	0.606637676813115
CHEMBL918058	0.837917402236131	0.815542954284729	0.859950545956003	0.740391293235139	0.78753633267355
CHEMBL1794497	0.41974974974975	0.55719052385719	0.646553219886553	0.494441107774441	0.63986986986987
CHEMBL2114727	0.704886522890065	0.810307480980558	0.772345681758637	0.820258393765479	0.769117536197496
CHEMBL1614272	0.542137374560413	0.574812848521885	0.558630186981726	0.59196592513375	0.607583454281568
CHEMBL2378059	0.883060692271219	0.769756598703967	0.72006875296349	0.913999525841631	0.837739054844318
CHEMBL1737863	0.538645262909969	0.78836171178352	0.689582085672473	0.752932757003776	0.681272287351914
CHEMBL1794445	0.744770514449845	0.803679513115788	0.764154436703456	0.763718357713456	0.881309744933111
CHEMBL1614131	0.661889610432471	0.741586478752678	0.659770119584472	0.611511876982551	0.639324720145657
CHEMBL1614480	0.708313349785807	0.939596655698351	0.871845445044598	0.935923045880673	0.891451051302746
CHEMBL1243965	0.763814192343604	0.799635854341737	0.679253034547152	0.70359477124183	0.702175536881419
CHEMBL1614097	0.582581357677264	0.675271069165844	0.65055205258039	0.629723273183283	0.678202363990977
CHEMBL1243976	0.842604909710173	0.830067456301009	0.737253992352677	0.792547173221515	0.724251735106998
CHEMBL1963907	0.625425333992721	0.661520836384906	0.668119115419101	0.615119897488631	0.664867461340647
CHEMBL1794570	0.643466371615012	0.721582691220802	0.722802894342457	0.725991686096982	0.729811747957322
CHEMBL1963867	0.597698374593082	0.640698318284525	0.625790928667565	0.594659188278956	0.660437457311881
CHEMBL1614356	0.643085063085063	0.736061592728259	0.669860263193596	0.659639804639805	0.688456111789445
CHEMBL3215158	0.653787764729499	0.719562380808993	0.577028756398675	0.597435511392151	0.623569707919301
CHEMBL1794457	0.633133903133903	0.638162393162393	0.708478632478632	0.735168091168091	0.692794871794872
CHEMBL1613813	0.631943451600415	0.734133097298715	0.66602350979731	0.669022554419093	0.689524540107152
CHEMBL2114797	0.863782470253058	0.878476621417798	0.742365230992682	0.783512652924418	0.783372437294006
CHEMBL2354207	0.702348055791825	0.786315529330487	0.750812832238262	0.764725422148197	0.770954830908568
CHEMBL1738097	0.764530093562352	0.85284178187404	0.792512684448168	0.827698645440581	0.782216170925848
CHEMBL1963915	0.67802990371776	0.891090818047649	0.838019625412889	0.857192177946447	0.850069400520065
CHEMBL1613955	0.647044102926456	0.633197368491486	0.614056569938923	0.577556834909776	0.612524958113193
CHEMBL1614484	0.614911014911015	0.431298170428605	0.484479771436293	0.332680041375694	0.506518763040502
CHEMBL1963910	0.783005493531809	0.894834307992203	0.845107323232323	0.883078039163566	0.90328227449938
CHEMBL1613861	0.570986463133641	0.679532930107527	0.587417914746544	0.627752976190476	0.610492831541219
CHEMBL1613967	0.633050428723506	0.722295722295722	0.693422308806924	0.652141315602854	0.663266682497452
CHEMBL3215154	0.687019205229403	0.724697035831271	0.65344661650593	0.598334243495534	0.698663426551044
CHEMBL1794581	0.58736643076708	0.658114347620298	0.720281828467909	0.564051467224926	0.710011909795538
CHEMBL2449559	0.970309591642925	0.954050739384073	0.924701668701669	0.918619725953059	0.953978835978836
CHEMBL1614425	0.571220575290343	0.558908221408221	0.466918202383319	0.551605640268431	0.468381747451515
CHEMBL1794438	0.714943266823469	0.758341196543614	0.712864767099018	0.759952156374002	0.75089849895451
CHEMBL2114820	0.601028573822691	0.738844896933132	0.735112912686442	0.623441427853193	0.729479847494553
CHEMBL1613947	0.582732138204402	0.704085457271364	0.71560640619861	0.65878972906709	0.682910681411431
CHEMBL1613876	0.536962929046262	0.610331199150643	0.620423000353556	0.626133683703128	0.638773518148518
CHEMBL1614259	0.574957740672026	0.807225314368171	0.611659451659452	0.700719439290868	0.629327973613688
CHEMBL1963933	0.630303506017792	0.64271818128961	0.71156869585441	0.736559102273388	0.712390836676551
CHEMBL3214959	0.731702461213887	0.748952374335679	0.715009540741031	0.749681616516594	0.704994515841383
CHEMBL2114752	0.545040915396953	0.767045939956157	0.720037736601204	0.647061177556534	0.721130383204687
CHEMBL1614516	0.861696880009866	0.713985884629614	0.842534885265185	0.76542682868987	0.787332688276084
CHEMBL2354303	0.595891971429606	0.551378868045535	0.723077420389248	0.73793231857748	0.693325730422505
CHEMBL3214816	0.684945669021677	0.704154977467265	0.681963410557388	0.707324669017238	0.677571407780247
CHEMBL1614287	0.626024531024531	0.573463203463203	0.54030303030303	0.49459595959596	0.486749639249639
CHEMBL1614362	0.591036756453423	0.700987654320988	0.720645342312009	0.798900112233446	0.756122334455668
CHEMBL1614388	0.69321187499293	0.723552861564119	0.68285934150108	0.726323910578677	0.694073740930061
CHEMBL1614255	0.664491743758695	0.683645398578111	0.699339000898266	0.692271661079891	0.718590270246585
CHEMBL2354248	0.854565427457606	0.870834809551817	0.835151772712967	0.737743677858003	0.892230378511146
CHEMBL3215078	0.655827393327393	0.759166689313748	0.692817243552538	0.748584185348891	0.724897538132832
CHEMBL3214985	0.687084025171914	0.681306071957085	0.69840407336939	0.654101836620392	0.684743105837723
CHEMBL1738599	0.68262267870111	0.714336290071584	0.68737031849777	0.708311287477954	0.695848895113601
CHEMBL1963698	0.71450366507667	0.699523959816829	0.674634477011387	0.677819173139631	0.712322602411737
CHEMBL1794452	0.466519246519247	0.434703794703795	0.467510237510238	0.262175812175812	0.576800436800437
CHEMBL1794296	0.861912797594328	0.955032615848555	0.908819642769674	0.942028071139393	0.936394569775341
CHEMBL1737910	0.479031715235984	0.636317536992624	0.558344960304891	0.645525061465828	0.593052758797532
CHEMBL2354227	0.721438944105374	0.773193782538246	0.734594268626281	0.801032217412097	0.72513475793338
CHEMBL2114930	0.545157776372198	0.5771522946096	0.612183217372971	0.586740811019748	0.411492726122707
CHEMBL1963974	0.66344566993464	0.678218954248366	0.651184640522876	0.629015522875817	0.653827614379085
CHEMBL1738371	0.780760859108685	0.797908149821193	0.785807376734913	0.775816787613889	0.800980251096193
CHEMBL1794548	0.758937120404738	0.844601848493708	0.796583439007681	0.746505415756753	0.825668663547451
CHEMBL1738418	0.821377871966218	0.912550054403115	0.896501954492929	0.885157703889251	0.908124601980044
CHEMBL1614218	0.587490852293207	0.479798677632992	0.515466360104712	0.471398139753901	0.542181668905807
CHEMBL1963969	0.578172905525847	0.597921865715983	0.56382798573975	0.557999108734403	0.624748960190137
CHEMBL1243967	0.787042416455076	0.813199964752004	0.756751169639179	0.808176100628931	0.754062997596169
CHEMBL1614528	0.564415336984996	0.672726494256422	0.662902256269129	0.620720145008071	0.65678066353247
CHEMBL1613981	0.636407452247352	0.749586660680155	0.709517921802334	0.72073707783045	0.708299747541858
CHEMBL2114814	0.519318342205138	0.653442565487775	0.549989005453351	0.631557657161581	0.596851215325253
CHEMBL1964112	0.436357466063348	0.495621473660689	0.513394503100385	0.542838109602815	0.506633986928105
CHEMBL1963846	0.512035858014211	0.659824859861461	0.646566833620855	0.558526265894595	0.714752970226199
CHEMBL1963744	0.690775340024166	0.715470723625622	0.701157024292262	0.700006666508455	0.742296379026516
CHEMBL2114728	0.402195594282532	0.465418708425714	0.530733204570933	0.355510818642436	0.420398865879438
CHEMBL1613817	0.633201480729853	0.739884936223871	0.729598677427137	0.736901911803701	0.742752437072603
CHEMBL1738325	0.779165956277942	0.774846082442979	0.741448182667778	0.693647230431159	0.799493413907201
CHEMBL1614311	0.819273320213361	0.828027810040005	0.786114068481955	0.785833163060467	0.797274917193616
CHEMBL3215116	0.465579195334911	0.47321629745163	0.406519495328274	0.53613159062361	0.435935847658238
CHEMBL2354276	0.557876468940299	0.665163120567376	0.688821368012857	0.710905206352015	0.712316391678094
CHEMBL1614320	0.607540233562274	0.677498426844627	0.647826604996777	0.638027803928739	0.662104396890298
CHEMBL1794566	0.565022507036414	0.506624922628641	0.53973475492257	0.716269554516152	0.543116832212179
CHEMBL1794508	0.519775812422871	0.74149069884364	0.801600850130262	0.786173956762192	0.808335618629736
CHEMBL1964111	0.668793966112182	0.747403224408204	0.706986098787341	0.714716804012959	0.689872576466869
CHEMBL1738497	0.784862025307968	0.913936280449114	0.892917978227804	0.89897930644625	0.887476389980927
CHEMBL1614515	0.539845387265271	0.663510110713441	0.561702493614094	0.654040854552596	0.570419271042995
CHEMBL1794356	0.732204104001653	0.728732003168093	0.763001981464805	0.707794350929968	0.766168601451253
CHEMBL3214930	0.533870473473783	0.695778252188252	0.555396216980795	0.642789415659724	0.595255558318457
CHEMBL1738025	0.603858721029585	0.748874789132203	0.644294458904527	0.704858579252209	0.655715453411309
CHEMBL2114771	0.430891543567675	0.464624046695032	0.504356210945386	0.563417576705066	0.492691243358502
CHEMBL1827362	0.98051578051578	0.981684056684057	0.977117327117327	0.939985014985015	0.975444925444925
CHEMBL1794578	0.728314544424798	0.737459233544456	0.704255963038744	0.707581604365375	0.739591505234606
CHEMBL1794358	0.503079369462965	0.684542549414132	0.567542948321739	0.795806100217865	0.662485369734748
CHEMBL3214812	0.674963004883775	0.754184148451268	0.631029413898684	0.768972972362899	0.670710267535395
CHEMBL1614514	0.354186122936123	0.427565752565753	0.490643046893047	0.404749873499874	0.480348411598412
CHEMBL1613898	0.811057112235093	0.878432247608416	0.862166999352682	0.891736605830844	0.882313215659134
CHEMBL2114857	0.612900410514092	0.693476572390532	0.620501083998211	0.657862810141936	0.664143182570235
CHEMBL1738164	0.39764715822322	0.449188227342142	0.398349331109753	0.403193040888295	0.398839226821517
CHEMBL3215228	0.536997337227475	0.567039959154577	0.571149944863212	0.513405917826353	0.658361071727691
CHEMBL2114811	0.397025305848835	0.657139265962795	0.736785654432713	0.557591754650578	0.628117144293615
CHEMBL1737942	0.719398480576997	0.760183893292583	0.760950395488337	0.709552537196478	0.77277247867297
CHEMBL3215220	0.649629919888541	0.571580750029026	0.480622315105074	0.551224892604203	0.664629049111808
CHEMBL2114899	0.56828692552269	0.51356728151217	0.608730502831572	0.538210390996064	0.654003097422502
CHEMBL2354206	0.874775274082898	0.936794112456709	0.848081143979	0.897513952308473	0.894837921602365
CHEMBL1794355	0.396316700633314	0.570142659917165	0.408812427409988	0.524059616943878	0.391334286590844
CHEMBL3215092	0.736735850471061	0.813433058018941	0.797048304046468	0.757871692091398	0.789910153878942
CHEMBL2114830	0.49990394137453	0.683264012675777	0.652350960586255	0.601246781540899	0.606186373539315
CHEMBL1613864	0.621815119810107	0.660010144408641	0.791189614247258	0.611710493164127	0.693244685788545
CHEMBL2114764	0.743221766791561	0.78140758808951	0.766730874007762	0.724607952434039	0.777365263772586
CHEMBL3214851	0.532496350158042	0.486937311812934	0.450955337273745	0.548708128061362	0.53661545751098
CHEMBL1614290	0.502934802369255	0.51450101712989	0.502941449102907	0.665987621985527	0.460467383939048
CHEMBL1964106	0.698632485781198	0.678753560288333	0.647805337809192	0.665545367002027	0.655409879591319
CHEMBL1794522	0.682085057588477	0.689740368933948	0.708112947118456	0.700296865199981	0.713242914563203
CHEMBL1614344	0.742221504486137	0.838899307110514	0.844954274400735	0.833230992515248	0.852460017926216
CHEMBL1243966	0.829148629148629	0.88044733044733	0.815440115440116	0.794065656565657	0.830826118326118
CHEMBL1614105	0.61653300947529	0.83278057678291	0.719636899528865	0.84022423976015	0.789197343011504
CHEMBL1794573	0.882611445402143	0.91014799154334	0.899548556525301	0.88791312047126	0.923047107930829
CHEMBL1614167	0.420281053855991	0.540677007084322	0.379664677882107	0.494973375948643	0.451307696838138
CHEMBL1738632	0.647689652621515	0.669579731682263	0.723392635916971	0.592917494215353	0.72965588020747
CHEMBL1738079	0.359453781512605	0.643977591036415	0.590172735760971	0.497152194211018	0.539542483660131
CHEMBL2354292	0.54918337005961	0.674239342317146	0.713964813402266	0.71642459106704	0.71728659914682
CHEMBL1794567	0.581167866611017	0.563788183736406	0.546396855025081	0.570002036620524	0.579595381083776
CHEMBL2114874	0.543950223012008	0.626982264282035	0.576554999228531	0.621190638400783	0.62109802718117
CHEMBL2114829	0.690062576783038	0.745714360915848	0.737340388557134	0.719678166085639	0.734655292035965
CHEMBL1964115	0.745609279050353	0.766518931264958	0.707631972306823	0.72769834535464	0.728513978130464
CHEMBL1614403	0.798015695544765	0.849204574495272	0.807661841818819	0.797612984022868	0.789026044476626
CHEMBL1963777	0.798837186659038	0.799108028295339	0.747784651068919	0.793240445860016	0.79356340770572
CHEMBL1614310	0.651525054466231	0.643347338935574	0.700529100529101	0.607352941176471	0.716316526610644
CHEMBL1033994	0.740253669526446	0.771816495599225	0.718969193368404	0.774064850441285	0.733319112937119
CHEMBL3215187	0.479225432996483	0.73768771561143	0.73655830518783	0.671009529004935	0.748733409306389
CHEMBL1738482	0.651722105142078	0.661215941722098	0.572684735475433	0.593643351098891	0.689019208239455
CHEMBL1738512	0.702120832556457	0.792614123797701	0.813150856370041	0.733822167827599	0.823782561742413
CHEMBL1738253	0.539481611664815	0.460280396928013	0.489512020159958	0.56374484017992	0.524529903974004
CHEMBL1963806	0.834963071251708	0.825286782167744	0.787577722791934	0.762782638043871	0.798353756722062
CHEMBL1613787	0.653167927149251	0.621251136149269	0.568969405429507	0.604118433914699	0.604621340741884
CHEMBL1794320	0.933472518360578	0.97536778939218	0.964226486614546	0.878667059591705	0.984126984126984
CHEMBL1964023	0.513977386093618	0.525393940493249	0.557215403751835	0.604445609713064	0.574251674936226
CHEMBL1794571	0.641591155330057	0.639856589386279	0.647509671059199	0.604170329557399	0.639221114546447
CHEMBL1738670	0.541788831037751	0.540162141441636	0.572000752592311	0.532034759917778	0.559211518882506
CHEMBL1963838	0.497382478632479	0.486039886039886	0.529985754985755	0.490206552706553	0.51755698005698
CHEMBL1614034	0.154972917581613	0.485507246376812	0.583525106133802	0.405331576635925	0.556527594788464
CHEMBL1794365	0.561914080107068	0.670843735047536	0.504666729076952	0.63497073651071	0.581934736177855
CHEMBL1614001	0.688571952154629	0.553468316460442	0.593385624094286	0.432315217354587	0.495137938838726
CHEMBL1738579	0.569372356467689	0.522313803376365	0.594556622163375	0.447969767185259	0.575673618007282
CHEMBL1738407	0.714362450987451	0.833753354785039	0.778641050445863	0.792931241086713	0.804934539643743
CHEMBL2354256	0.600034669372569	0.595241223646489	0.610460915198083	0.539383974253177	0.607230876830508
CHEMBL1613941	0.585773366418528	0.639830897895414	0.573838188891952	0.62259187778901	0.613291262036782
CHEMBL2354274	0.83211223530991	0.777913526000548	0.793205417155155	0.773316732862869	0.706385687330924
CHEMBL1963776	0.756510821220834	0.757910902284663	0.716089004506057	0.725438825054655	0.750878603386039
CHEMBL1963778	0.623163988710394	0.711151334274603	0.702169140021359	0.698142887787161	0.718676996704074
CHEMBL1738642	0.553222433537334	0.561094693552451	0.626327465275238	0.650227285657393	0.663453620396785
CHEMBL1614434	0.653869756696267	0.694813759628574	0.705171523300178	0.622173489278752	0.711517913174833
CHEMBL1613762	0.718778386803749	0.669735022090095	0.700168256327677	0.538226702175978	0.686854845369338
CHEMBL2114761	0.642578035999089	0.676284837469048	0.689752825279141	0.671561556429978	0.707272061877325
CHEMBL1613991	0.769054344368065	0.774876118821958	0.737308957904762	0.746904193764719	0.738377003665672
CHEMBL1614328	0.719427120817584	0.789406562618711	0.827241221959609	0.771664587617889	0.828818908192456
CHEMBL1964117	0.71371452982826	0.768629257333709	0.639291375626187	0.726368017311526	0.656949344803479
CHEMBL1614104	0.583867774010536	0.696426423882128	0.592766542453589	0.723253254646559	0.576940007722762
CHEMBL1964103	0.729880599542004	0.716749479025523	0.698697681349672	0.668973314259607	0.690355005286402
CHEMBL2114791	0.585582530026974	0.629874685430241	0.473930890597557	0.475997975997976	0.381270770159659
CHEMBL3215171	0.622008234960042	0.943820737495436	0.888265181939881	0.905237110056387	0.864414729625573
CHEMBL1613874	0.644783306604344	0.797024511009533	0.754683943482922	0.759814753059203	0.75614646143246
CHEMBL2114719	0.514453945923106	0.549217165010589	0.600353357382233	0.577741818255385	0.584741305740824
CHEMBL1738485	0.646419465212492	0.751233745404298	0.721979996874512	0.655894013044801	0.752643916401411
CHEMBL1614288	0.689711443366559	0.82635422272386	0.812472136102499	0.805668836724942	0.828383298647325
CHEMBL2114748	0.572981560559376	0.678625340368408	0.59474745569256	0.632599909679706	0.659155143207209
CHEMBL1738610	0.766587828138216	0.801951058034779	0.721000085356674	0.783111418395139	0.757198975719906
CHEMBL3215128	0.58179186228482	0.715212400131785	0.741762931389507	0.75931811630014	0.740693208961371
CHEMBL1738611	0.448325468956792	0.588607374941244	0.647217232125584	0.538145531942726	0.662310440353865
CHEMBL1614247	0.552567987567988	0.716807128057128	0.638204526954527	0.638631183631184	0.634166944166944
CHEMBL1614314	0.712132725430598	0.765760441292356	0.716419002589215	0.679061127997298	0.77241641337386
CHEMBL3215185	0.644911029693638	0.734436199653591	0.705826057999971	0.730442752181883	0.761527022396588
CHEMBL1963799	0.823877702607631	0.849103882352656	0.8302478407644	0.855475703520139	0.823166187625933
CHEMBL1794475	0.743463176390006	0.811310950792658	0.775560370072565	0.777758234313112	0.803163187309529
CHEMBL1614549	0.575304896067309	0.619709603128357	0.624954190676355	0.662040485273781	0.608489956604096
CHEMBL1738171	0.751541909869539	0.754145966086392	0.776402142866545	0.738536607303472	0.782093199777114
CHEMBL1794387	0.707995030962577	0.721504437790442	0.729797761250094	0.710144327462786	0.761847172585509
CHEMBL1794516	0.702133032452181	0.822836830588281	0.781567431243447	0.733983777165595	0.833136604601788
CHEMBL1614091	0.488153546889041	0.614847591777045	0.716033051085547	0.708347055003898	0.666595034894906
CHEMBL1963937	0.873408431472948	0.923611756766468	0.889142154220677	0.916829820968191	0.898065897270057
CHEMBL1614385	0.615395787944808	0.576546715044795	0.744445720597934	0.626032663403797	0.746319079889931
CHEMBL1963692	0.766812229711773	0.73350747003715	0.725712947630756	0.711530330822568	0.740200117825689
CHEMBL1614086	0.21682665160926	0.417968504925027	0.363510885250016	0.528546332894159	0.460427253905515
CHEMBL1963831	0.729685022463844	0.792059367231673	0.728266714952179	0.760403827062662	0.738241764964823
CHEMBL1614016	0.453393499726896	0.540606877741203	0.610242403509443	0.555142123989702	0.667326598669678
CHEMBL1963758	0.686555204257992	0.70833880164447	0.718531816456965	0.706283565902263	0.755040374363894
CHEMBL2114737	0.652699481370779	0.795898117427657	0.792096466741092	0.744267647611871	0.813907218274991
CHEMBL1963803	0.722987748138958	0.807300752562849	0.75514763014763	0.809427831353235	0.777539507983056
CHEMBL2354269	0.657972430525676	0.737014328545769	0.787879342785529	0.742680737394226	0.773323071827129
CHEMBL3215112	0.748169934640523	0.778082788671024	0.736688453159041	0.687755991285403	0.749324618736383
CHEMBL3215096	0.643376999942253	0.662941148660372	0.661142294219801	0.630548817338218	0.6804640649706
CHEMBL1963687	0.668269010380274	0.724194737133634	0.664205008482254	0.689218954076835	0.690500382645845
CHEMBL1614423	0.725210962286013	0.863686894650324	0.792981841812493	0.829563698686622	0.808303823238587
CHEMBL1963689	0.618578684984711	0.676401098502964	0.654445531353709	0.657090198976856	0.722761908902512
CHEMBL1794410	0.733465223204912	0.840192521649587	0.728274092449633	0.815581587655202	0.728819599236688
CHEMBL1613928	0.631404727878941	0.611379205463824	0.584352916722094	0.59644820482502	0.604364016285523
CHEMBL2114850	0.602975540102183	0.707143148899421	0.671146345578843	0.743769417007171	0.720217003669811
CHEMBL1963721	0.678085594786723	0.661187155923998	0.603869131773267	0.622989395994565	0.613575119881511
CHEMBL1964000	0.675200018511997	0.734713142215534	0.737177010578089	0.685759076575616	0.737613146312962
CHEMBL1614202	0.438024730725624	0.534151549508692	0.507980678382464	0.632050264550265	0.510377220332577
CHEMBL2028073	0.709800928918576	0.823534000494785	0.835595776772247	0.754950641225151	0.841133376427494
CHEMBL2114825	0.475541449707047	0.572480026748319	0.573459470924169	0.558433106972902	0.592116030097416
CHEMBL3215013	0.557785953296789	0.677022643188057	0.6350805074821	0.555478491237005	0.616887584379844
CHEMBL1794413	0.802888024470139	0.852584541720268	0.856073649510513	0.814901892141894	0.889746307471078
CHEMBL2114858	0.569645772445747	0.588584022778277	0.54679308451981	0.575886746112837	0.560336521579228
CHEMBL1738402	0.850400817721361	0.859641966386949	0.817745302324313	0.822346966049559	0.853833022175279
CHEMBL2114852	0.303093783521051	0.37591386765889	0.269843205282918	0.415809365781711	0.323313053097345
CHEMBL2114753	0.598007855155992	0.740511789062942	0.670219119043779	0.77925181598304	0.647804311738374
CHEMBL1246088	0.641552579365079	0.681940310846561	0.720049603174603	0.746675760582011	0.705863921957672
CHEMBL1613884	0.561385585329974	0.66401136300186	0.659118756734547	0.660823882935838	0.638741135548652
CHEMBL1614084	0.58709752042054	0.67535374950804	0.693949609017678	0.665847418838343	0.678306559288408
CHEMBL1963717	0.820550149069117	0.843571938918355	0.815575979351893	0.790295538600649	0.836112398028336
CHEMBL1613807	0.599365253985716	0.709470113678034	0.743475081635148	0.649840658669042	0.685025189026839
CHEMBL1964096	0.705906012360381	0.796979499018859	0.80321172675844	0.772852546098653	0.814512852823839
CHEMBL1964108	0.779362715473827	0.77465970243748	0.692986848542404	0.691054418832197	0.71367089700423
CHEMBL1963893	0.750082997040413	0.815861982413939	0.707135876069326	0.779462443459175	0.736716352894583
CHEMBL1613867	0.471988344988345	0.481112665112665	0.532067599067599	0.479538073038073	0.476438616938617
CHEMBL2114842	0.851397273466165	0.92012298289042	0.872336835457289	0.865466949174694	0.895945492169283
CHEMBL1614069	0.47681813662813	0.572065961912608	0.593839465157295	0.602355529430437	0.585835928012369
CHEMBL3215277	0.857353474173425	0.899388170484042	0.901300370324357	0.878971648406659	0.920414233346453
CHEMBL2028074	0.848926570887355	0.886512790042202	0.814127651578632	0.857929724596391	0.845464803896176
CHEMBL1614301	0.593058794676736	0.626246483239862	0.670534524404464	0.539484887186037	0.622902090621356
CHEMBL2354289	0.540240303813482	0.656662241115143	0.621481886969847	0.610115327776164	0.615676964287518
CHEMBL3215288	0.583212023691918	0.637148528966997	0.601990990755642	0.617073538807191	0.62865611219198
CHEMBL1794494	0.412614425505051	0.32327178030303	0.506949705387205	0.528561658249158	0.511713489057239
CHEMBL2114909	0.730455671060988	0.610409937729359	0.729234356685889	0.548623968016503	0.679240502768294
CHEMBL1963805	0.71824908642907	0.739175412218189	0.708212607647636	0.731538995784355	0.719907984879736
CHEMBL1794327	0.54657622631302	0.579393235642402	0.523664448291357	0.586655253933317	0.557781219619661
CHEMBL1738408	0.547369534668327	0.349732721727189	0.359063907253042	0.510250191625946	0.567715020280413
CHEMBL1963947	0.725096344761663	0.868086594989032	0.862523522492256	0.856123790824893	0.84096246515574
CHEMBL1963797	0.732139435342803	0.790100589451763	0.790087551859124	0.720836891647196	0.808831799357298
CHEMBL1963770	0.791971329204344	0.757806165547069	0.808936798037874	0.745435587494769	0.79619178431896
CHEMBL1963811	0.683277995597315	0.665970968424476	0.614815656862413	0.639754847671735	0.608756545714504
CHEMBL2114725	0.510597765436475	0.482650426037523	0.514755352174707	0.493069791618179	0.488144304918498
CHEMBL3214830	0.715638780180065	0.777978431694028	0.790347072227806	0.722380770775266	0.793763356928495
CHEMBL1614359	0.623387708867163	0.712207719786532	0.677486272480671	0.689542062569947	0.676598944028381
CHEMBL2114882	0.80010611457916	0.896966542304085	0.91266085692992	0.917848567678582	0.943512925482328
CHEMBL3215025	0.681856663332727	0.744701612414378	0.677008622779899	0.635216137782627	0.701609421409953
CHEMBL1614128	0.466441833656515	0.551556479080146	0.583277369463055	0.579580838816855	0.585877662378323
CHEMBL3214992	0.739021796960229	0.811024738261528	0.756950830427203	0.745699999354512	0.762592064643085
CHEMBL1614185	0.647967640521326	0.736821734202453	0.682212862671192	0.700771216185703	0.716848665443632
CHEMBL2028075	0.828930367391906	0.826694615156154	0.830382368843907	0.81833354910278	0.827274654197731
CHEMBL1963789	0.764859253154277	0.770899238277792	0.722713878937553	0.742682223707305	0.729442745259925
CHEMBL1217000	0.878637041452167	0.857502815648655	0.817017372154266	0.699167509698819	0.815400865712603
CHEMBL1963971	0.547217024313798	0.52967214983344	0.505843594875853	0.538896270993045	0.497129650516747
CHEMBL1738673	0.559843797131933	0.570052537364886	0.57709019021065	0.555463329827737	0.601458272917111
CHEMBL1614336	0.70536725765851	0.822573019887431	0.764222647554309	0.776959496664907	0.782057263040231
CHEMBL2114872	0.52481617477421	0.695217005993348	0.679533180860963	0.69602541218632	0.661321342526509
CHEMBL1614276	0.603061175618609	0.638175801526977	0.624835063601765	0.618270096568807	0.625487641334856
CHEMBL2028077	0.747845441595442	0.844230769230769	0.882995014245014	0.652564102564103	0.784188034188034
CHEMBL1963752	0.828668084347656	0.862326385619741	0.838324339318355	0.84224846776808	0.854901319074568
CHEMBL1614098	0.543936403672093	0.540574558986351	0.640273914408846	0.59914222348829	0.681890512434773
CHEMBL1963686	0.720529820342482	0.757247806659801	0.745997865102756	0.753952540229939	0.774384610445751
CHEMBL1963716	0.64270886180926	0.734824162945022	0.766280278832511	0.795959334716922	0.770117060549562
CHEMBL1794396	0.468632602948664	0.464640201689129	0.573108758032393	0.478832716204539	0.526011005385169
CHEMBL2028076	0.851501623376623	0.880514088870067	0.884557041690194	0.802064315515402	0.882810833490181
CHEMBL1963702	0.796096730466159	0.817170139069861	0.824125115178374	0.838540763904322	0.838094451289653
CHEMBL1963916	0.543100981330971	0.555532326882915	0.532236711649929	0.507934461181305	0.551594169325941
CHEMBL1614304	0.685095668858306	0.823864327803898	0.782913236397861	0.792532602909219	0.796607005890392
CHEMBL3215157	0.657286053243237	0.759433668085473	0.749125769711403	0.709279866551629	0.737856963617756
CHEMBL1614466	0.605310332026089	0.627181523262871	0.585063814973665	0.715296152794369	0.604154750940408
CHEMBL1794336	0.609153496559355	0.733239966543009	0.67584074215837	0.695278980617293	0.673330362408011
CHEMBL2114865	0.489231248487674	0.484352508296817	0.479901634812896	0.458624538795897	0.563848067137541
CHEMBL1737961	0.71268689144318	0.854091696487207	0.824196517223317	0.843232005970251	0.764225251254808
CHEMBL1963695	0.800833412611001	0.818346222706945	0.835251155374497	0.834509919670414	0.838096052435667
CHEMBL1246087	0.673759477749433	0.761879084688901	0.780920067215818	0.790881778920219	0.770376552736234
CHEMBL1794467	0.78945509432428	0.848582847492731	0.82733588547542	0.807484975726255	0.829697205787322
CHEMBL1614547	0.652533562113116	0.685670517980667	0.686186149289145	0.693029177190363	0.680411021873029
CHEMBL1963764	0.744912119069327	0.782524811348822	0.756370155962817	0.76403236518064	0.772511371686913
CHEMBL1794499	0.758093282928662	0.837394757941614	0.783504697036581	0.811347013475388	0.797177691763074
CHEMBL2095143	0.55307792264314	0.753718625457756	0.701650719042023	0.676099702186659	0.703120511816164
CHEMBL2114816	0.504178713334863	0.62106223422183	0.580481538053338	0.574954247012647	0.581859704682955
CHEMBL1863510	0.999324552516042	0.997431943735718	0.999324552516042	0.998783454987835	0.99500131884819
CHEMBL1614199	0.590181676424376	0.613308596371543	0.549877226385987	0.587894517696594	0.580340176803512
CHEMBL1963825	0.720999539184836	0.759992499416001	0.675335327616583	0.6913858151615	0.708773041627361
CHEMBL3215227	0.477499226039933	0.520657638530594	0.507761279813326	0.494802089403156	0.534727317667591
CHEMBL1738510	0.742650155113888	0.829577216307839	0.776364212271922	0.762671884402248	0.737462303656349
CHEMBL1963711	0.875626359848066	0.808745805214441	0.836397831618542	0.801396172142936	0.854243463509975
CHEMBL3214906	0.616222441605647	0.682406532271342	0.665272010671066	0.686594980235511	0.66142545838748
CHEMBL1613997	0.578644110934515	0.71902174689643	0.606312325173529	0.631438761025442	0.675775616838342
CHEMBL1963743	0.661406369433729	0.671119681651556	0.677194887363424	0.666469450846195	0.698961777646319
CHEMBL1119333	0.959191874581811	0.932904162439269	0.953161791236045	0.896655719972852	0.954025764390154
CHEMBL1963815	0.73098795304622	0.79153912198756	0.761420094789676	0.747228452608582	0.763110371629933
CHEMBL1964118	0.766931857904607	0.826593566619269	0.799129628379292	0.770262566372882	0.824538421188342
CHEMBL1738183	0.60731475656996	0.692663182537202	0.728399309199697	0.668553417213683	0.699899392916819
CHEMBL1963824	0.781708757923315	0.801773906242898	0.774505747879813	0.809874898514017	0.759465956773312
CHEMBL2114821	0.664104643838206	0.684658750668165	0.659031657391861	0.696072093654753	0.642649693787504
CHEMBL1738593	0.761456386077882	0.846339871007337	0.855682660480371	0.815035402401392	0.847194665311164
CHEMBL1964114	0.839271720236847	0.868538067231104	0.842395919747464	0.819172975853316	0.852142981813268
CHEMBL1613929	0.550305609809615	0.674481116292536	0.693321927984677	0.626169589005878	0.685915974522082
CHEMBL1963786	0.747224528504895	0.788134748579612	0.780751697724195	0.738554344159064	0.796237789546396
CHEMBL1963751	0.711248589612979	0.719496931065254	0.706432892121298	0.708150636075067	0.703369487272179
CHEMBL1963753	0.742530896017111	0.766878921903345	0.819740863121869	0.756726373336678	0.825238385480976
CHEMBL1963766	0.798796716821702	0.793036659844567	0.812746193610865	0.767167871010648	0.797023643789929
CHEMBL1738242	0.651122936299218	0.697929770253488	0.653435422602089	0.678736434135072	0.689499529731902
CHEMBL1963798	0.784039212916218	0.712393404773084	0.718165024715827	0.607038937988136	0.75421005267262
CHEMBL1794528	0.795476994868585	0.896004815824829	0.870198267866914	0.876549974308499	0.878538363079527
CHEMBL1738391	0.618231511218825	0.706496639066774	0.659570135694927	0.641868980329318	0.677882489924307
CHEMBL1963804	0.737788957672859	0.771987227874494	0.755660808509162	0.734858560766164	0.747845536478121
CHEMBL1963760	0.772229855259828	0.809640806782984	0.728264730203967	0.742160753166775	0.760163420269568
CHEMBL1963734	0.813195997496337	0.84260477710859	0.807122427829939	0.816440267538864	0.80879118433832
CHEMBL1963773	0.712214433525175	0.704069173934903	0.685430850526758	0.671067607087428	0.684524608431258
CHEMBL1963820	0.744119802572077	0.760141104967153	0.750004614946631	0.765865432502364	0.775406201008342
CHEMBL1963738	0.715675534882793	0.779552083080067	0.731686725355866	0.725287239182491	0.745942718493207
CHEMBL1614433	0.626267283723424	0.690418239979643	0.694825106667212	0.677394843622914	0.652701327262731
CHEMBL1964081	0.802974438697613	0.844831198456908	0.794312993321928	0.790985172314212	0.831179180587789
CHEMBL1963787	0.74824940958977	0.753824280507703	0.748222812976911	0.697897917333713	0.765723185856734
CHEMBL1794531	0.491640631970539	0.560661977129425	0.486397140871601	0.497935131322254	0.430895959065534
CHEMBL1614030	0.623311663928508	0.736651495016613	0.669934301746505	0.721902031522789	0.670998006455657
CHEMBL1963821	0.732415627191084	0.773947995786413	0.708453915052876	0.725923159223056	0.728482867912085
CHEMBL1738513	0.61266552697715	0.627861656556228	0.559551372604405	0.591759805232524	0.571500506179155
CHEMBL1738131	0.687336872763591	0.787388985799844	0.752369152307973	0.736852151333447	0.762783735243737
CHEMBL1614504	0.654286923134572	0.759712145717818	0.740043070311359	0.691678496740093	0.702283757541601
CHEMBL3214993	0.677610464349526	0.760598669576687	0.699503717027761	0.730546892996032	0.724678511556286
CHEMBL1963747	0.807686896630607	0.829028564594155	0.831627292330332	0.85145201664224	0.827237541474006
CHEMBL1794350	0.591522803807866	0.677744504974178	0.630169830421439	0.662584550852172	0.65090891746317
CHEMBL1963712	0.72580799321655	0.790901951680546	0.754750450577457	0.777588810304899	0.789035742594781
CHEMBL1909089	0.889026266684563	0.907979405486862	0.898535885550053	0.903059679405363	0.911714967790899
CHEMBL1963705	0.771343940276018	0.744853146417335	0.742295329314246	0.705366537947633	0.772350859250438
CHEMBL1738249	0.518293136686572	0.495664877454509	0.41673327327395	0.520517208426149	0.409929219238775
CHEMBL1963796	0.681696398844857	0.731429208449387	0.673639748060393	0.722521394237559	0.711394584040169
CHEMBL1614170	0.600201917663885	0.724413121032193	0.68248832552603	0.662999229593721	0.689335122298851
CHEMBL1794383	0.728389703390107	0.782265854153846	0.737591497372972	0.732006426974787	0.748636973754124
CHEMBL1963731	0.85099865243444	0.909053178447873	0.871749399697696	0.873337558163087	0.892640013716704
CHEMBL1963819	0.768873438296428	0.822131260439071	0.788808974929166	0.797616227518759	0.801579049959995
CHEMBL1863512	0.977908342455756	0.987977786900201	0.984622445721584	0.982705026455026	0.98926917989418
CHEMBL3214970	0.935116442993914	0.942283295163943	0.918367494821201	0.909147682259457	0.937975526885914
CHEMBL3214971	0.864351601164972	0.867545714403624	0.828128688966859	0.814941358035835	0.843967655208993
CHEMBL1738414	0.720838653253267	0.647810332626109	0.500966117557394	0.586856990359372	0.563904933090192
CHEMBL1963802	0.683445352770705	0.743965830673471	0.693263506464728	0.711480111553702	0.694629301709907
CHEMBL1964100	0.638987782967338	0.652180752320638	0.674602098045427	0.589189129026826	0.706611396467924
CHEMBL1963780	0.75793364445255	0.799247540724178	0.811734599854	0.757127872829092	0.789445673869652
CHEMBL1963795	0.679560796846959	0.742406910744714	0.702442709029756	0.713947028899959	0.713840046422486
CHEMBL1737865	0.552928308762602	0.578177884289673	0.578522987295718	0.543966500692968	0.58181478642103
CHEMBL1963696	0.685417860754497	0.766944223569304	0.715873233208158	0.713516769479609	0.743568509658181
CHEMBL1963822	0.677081696192823	0.716503437209244	0.730641861237542	0.677746676473793	0.726569480767135
CHEMBL1963801	0.824940245458219	0.764093556914834	0.721743625111092	0.705224999255234	0.738872798406929
CHEMBL1963818	0.809307133058955	0.782840735160153	0.784776368823488	0.73843582296947	0.786267555623358
CHEMBL1964116	0.704610655615167	0.69277817574486	0.679023803437738	0.678637054525639	0.689833865152577
CHEMBL1963754	0.80146407569312	0.762937451153071	0.736920960910963	0.724948995446137	0.748755014582218
CHEMBL1738424	0.859758041611138	0.94858576107716	0.935135395818021	0.926855161385057	0.944809761750676
CHEMBL3215192	0.742969293391794	0.800498451501333	0.780273018355984	0.729698120922035	0.79082510231328
CHEMBL1963720	0.721498166835878	0.730265674526631	0.687829682511867	0.698769995358818	0.70058819300136
CHEMBL1963728	0.753299950149681	0.774425366487361	0.736621791655484	0.740182956830531	0.750132424229459
CHEMBL1614171	0.725977337055393	0.80154865203739	0.80630205711662	0.756755706276413	0.786201617801939
CHEMBL1963765	0.7531306813628	0.793493666946274	0.774411400455369	0.748911623524428	0.787745150979405
CHEMBL1963710	0.7340264902535	0.770645262860377	0.762486870138496	0.729310810209104	0.780417386506482
CHEMBL1963834	0.74597115733977	0.78120397743208	0.738327700205437	0.711747529802274	0.752970945500143
CHEMBL1963697	0.75770743055489	0.77502730378499	0.756582374447745	0.719531217877861	0.765767571808568
CHEMBL3214929	0.722859102994975	0.760728611471363	0.745496721703924	0.718930916388924	0.739984599213488
CHEMBL1963791	0.843794326837613	0.838416535342227	0.8329307568438	0.817195660821583	0.824293679508323
CHEMBL1963729	0.690001807587257	0.674522056100357	0.644771250137118	0.682835055988754	0.664206462680374
CHEMBL1963733	0.768073953449713	0.813272043684793	0.763106169052381	0.767934607786706	0.776692987541562
CHEMBL1737860	0.483192993341739	0.562184524715027	0.567308297417066	0.539804354826939	0.5763328108819
CHEMBL1963763	0.700071668306962	0.76758557008557	0.772967112967113	0.747816114360232	0.781321279997751
CHEMBL1963688	0.694785806566134	0.749238647353217	0.72678933741875	0.722245268081476	0.737058690934654
CHEMBL1964022	0.479682257606234	0.536214661580159	0.502185115123712	0.485420565793373	0.489038100587808
CHEMBL2114926	0.65969238200908	0.733217753640654	0.704891995638163	0.696469376600754	0.718364152484259
CHEMBL1963793	0.748746247164085	0.757727738422622	0.75331468415685	0.755483534608685	0.747927059259252
CHEMBL1963708	0.738031972374893	0.774568810219883	0.76388658764956	0.744243853683385	0.762381072369076
CHEMBL1738494	0.567765492464845	0.666029886103892	0.620361804913146	0.721132696063316	0.688363703997376
CHEMBL1963737	0.832330987885124	0.784241860990667	0.77716406952467	0.755166320513381	0.765680479201658
CHEMBL1963833	0.821907578746592	0.841403715140559	0.852570908500745	0.823526887148721	0.83130351946067
CHEMBL1963745	0.838866304179589	0.874598304917487	0.840113533475191	0.854599934451239	0.868251550245636
CHEMBL1963724	0.737801566847071	0.779702615618927	0.75484604671196	0.741284040531833	0.743028632162791
CHEMBL1738639	0.532076809843442	0.556603796412707	0.549679951573544	0.564599558496007	0.539260002652822
CHEMBL3214944	0.6803512212634	0.747690864312165	0.747383792222457	0.730796000969876	0.742154397859845
CHEMBL1963938	0.623517397204304	0.646820276598102	0.602930719278325	0.630705708685109	0.625925315078141
CHEMBL1963828	0.768398210393422	0.836258594533757	0.791899056166195	0.816313590866614	0.792846175828842
CHEMBL1963808	0.770071836228862	0.807161200626466	0.752301958868922	0.771002436261747	0.777669953532598
CHEMBL1909172	0.951067026537201	0.949776304635794	0.949322427831746	0.930889981917897	0.95250017762715
CHEMBL1738369	0.710456850140131	0.741244492131831	0.72567625156045	0.719847388681686	0.727956555559191
CHEMBL1963812	0.749243982879489	0.778270758175014	0.76441176087578	0.748041289954473	0.769645962744852
CHEMBL1909182	0.757696204270186	0.885370454327753	0.818881145335962	0.812336978553463	0.838774888725236
CHEMBL1963794	0.787407492159466	0.80775525266498	0.825945365889856	0.789603888583363	0.82288355285342
CHEMBL1963836	0.720424544917546	0.733683846217134	0.714439989154909	0.714571669810659	0.730615698679884
CHEMBL1964105	0.687779915543944	0.720806612634484	0.733211354746333	0.685064133007349	0.723255290168731
CHEMBL1963809	0.765225466759653	0.777089023179283	0.771387045494391	0.782313697059266	0.769946106975379
CHEMBL1738495	0.344918160250678	0.513680528939607	0.519820536385204	0.593834084074802	0.436633710970716
CHEMBL1963800	0.759170746361179	0.774207789793284	0.778616380401199	0.759160641748793	0.785312471751965
CHEMBL1963748	0.76997507629673	0.795126636251368	0.779130537793272	0.789501167022638	0.788000308297953
CHEMBL1794303	0.632273975899223	0.782039901263063	0.72496297950353	0.774130912145658	0.672930235329084
CHEMBL3215210	0.847910644539544	0.93746781343946	0.904003973037587	0.915294708400357	0.919891099004911
CHEMBL1737912	0.524409193314478	0.609288679536944	0.562827600186779	0.660885987596079	0.54693127141703
CHEMBL1737967	0.684266098192488	0.716763609105898	0.657846471117726	0.689672715130941	0.685819173751452
CHEMBL3214902	0.837952268277806	0.885426798437248	0.822838697703036	0.848679745145772	0.859497476558605
CHEMBL1614469	0.654683386159505	0.787674429184385	0.767198083309484	0.722409347387386	0.753229802580727
CHEMBL1909087	0.907728005807771	0.938270261699907	0.92197810500492	0.927612866376492	0.932362362497289
CHEMBL1909088	0.907250179765393	0.917685507153053	0.899249305086019	0.898393890123099	0.906359965442116
CHEMBL1909140	0.925634158782988	0.936069559837873	0.926562413869382	0.931199157960076	0.938540697899713
CHEMBL1963761	0.669779909273456	0.629385322394898	0.656682700960641	0.614418652032949	0.654004390401226
CHEMBL1909093	0.827133150912708	0.847125260817099	0.870727139910969	0.809624705887101	0.802208016014271
CHEMBL1963735	0.777441714107906	0.842138142282602	0.81373949084486	0.797925234140328	0.830905474016227
CHEMBL1909104	0.905753962298515	0.923229112884413	0.889417172687992	0.907529338744921	0.901491429974448
CHEMBL1909114	0.955284672341914	0.933009701930178	0.950432508634583	0.885857437432543	0.949062086019443
CHEMBL1963759	0.785077580880021	0.817578319494281	0.778645522008597	0.780497634715684	0.789863211461387
CHEMBL1963694	0.763298409171409	0.704400285310619	0.763271309142214	0.621414222238679	0.766879737079592
CHEMBL1963756	0.712725061195322	0.745339626062775	0.719902532054864	0.695374440453602	0.721444790015607
CHEMBL1909215	0.918997959760827	0.945274960945917	0.92705971010199	0.89700551695037	0.932544452075702
CHEMBL1909213	0.743222807991121	0.779231152628766	0.746939100587824	0.738659334278785	0.80383807086776
CHEMBL1963783	0.713300751106297	0.770626905551842	0.740734513010827	0.74382183075717	0.757095612355637
CHEMBL1963827	0.752909636980801	0.77958975035963	0.769128693834817	0.722793081795569	0.789277669991341
CHEMBL1909170	0.9412896118373	0.935700113668564	0.943880356068978	0.931725813905487	0.950476031691357
CHEMBL1963707	0.72219077880364	0.758326134976073	0.744180696284628	0.726426903512318	0.760417937853938
CHEMBL1909192	0.468204112431617	0.459831478337421	0.266243266469639	0.400036680710139	0.25999496950261
CHEMBL1909206	0.965578304117044	0.935870872514791	0.907327550900413	0.910272536687631	0.817504146239594
CHEMBL1909095	0.952035634842494	0.944828913815827	0.93434644602289	0.910223137772777	0.876125847177291
CHEMBL1909097	0.837348957194529	0.767404237553491	0.636974797545121	0.833381186939581	0.654446744380288
CHEMBL1963706	0.744196754843779	0.762533897187942	0.745045191587872	0.755452595256231	0.770437362266007
CHEMBL1614522	0.613316221722364	0.599916207161788	0.642431646478312	0.664203693408698	0.657140009983852
CHEMBL1909115	0.971035645761828	0.973048992279017	0.931977675016792	0.949963257652513	0.935247717005112
CHEMBL1738502	0.693047220618328	0.714905192057792	0.654676826613586	0.708678459472848	0.655150153379247
CHEMBL1909139	0.899714807419768	0.939881022600957	0.917929178535193	0.918551338236256	0.913083488788525
CHEMBL1909204	0.900894699598917	0.907022297388557	0.847997419093424	0.776809353021432	0.865387000595719
CHEMBL1963810	0.70768538613574	0.711393434216363	0.690148333452648	0.674525690782503	0.729000703770621
CHEMBL1963767	0.732251562210005	0.757777077660217	0.74501864102676	0.708645198659763	0.770562420759369
CHEMBL1963966	0.738032077432527	0.871205271387054	0.824134556465334	0.827630608712047	0.856587393598234
CHEMBL1963816	0.780603100945142	0.723761805746838	0.773558375111455	0.647305286527702	0.77639966361777
CHEMBL1909103	0.918401484965811	0.928071679098847	0.939934027517394	0.900321282453405	0.938072610612569
CHEMBL1738552	0.784923120153947	0.814243355203891	0.750979416820817	0.780355173800818	0.77991706636904
CHEMBL1963714	0.747994792536122	0.73030731013854	0.713238474061742	0.698646534978222	0.748894420747879
CHEMBL1909102	0.955956037716189	0.978292543027955	0.963116440582453	0.955040625240766	0.970297727233387
CHEMBL1963704	0.743155665159567	0.779701107390107	0.735926996060572	0.718497544327336	0.749017576210596
CHEMBL1963785	0.757196682043817	0.777333611766499	0.737492762097701	0.752014426741926	0.743522430601779
CHEMBL1963739	0.774026422637534	0.77643229309896	0.763794166571944	0.731516834294612	0.774545867601423
CHEMBL2114896	0.625724812835341	0.656015130336465	0.651370168178207	0.584634322273073	0.663400007082018
CHEMBL1909143	0.887523940903227	0.908459158368616	0.921757280306261	0.863719217221174	0.923378796175104
CHEMBL1963817	0.736513796090949	0.764581762440135	0.710975395017386	0.75561466225356	0.723675016810363
CHEMBL1963788	0.750883346296481	0.762352530262281	0.742464994570744	0.723275501261709	0.762513344473149
CHEMBL1909124	0.755354993983153	0.925301646002535	0.955441663292915	0.902451339165847	0.94457815215938
CHEMBL1964119	0.750404684698165	0.760637204578264	0.722325511424134	0.726271570253081	0.740049975037486
CHEMBL1963779	0.76478571264453	0.786484448095043	0.734291791127853	0.760264548794865	0.758838064664289
CHEMBL1963768	0.780092820822284	0.813070151562902	0.804076784909048	0.802561203164923	0.788604225698306
CHEMBL1909084	0.631122673019877	0.71842228252676	0.64188599257235	0.688441276332804	0.658831334152965
CHEMBL1909209	0.875563662956546	0.919053325779282	0.875432696450243	0.913251738344557	0.890026866907293
CHEMBL1963749	0.69651746198489	0.701610346672366	0.668921218878301	0.635468138686462	0.70371899292664
CHEMBL1963792	0.741661455857819	0.734658322498975	0.726834554917573	0.753929374450579	0.756401039931363
CHEMBL1963826	0.796678623209966	0.799084194896275	0.771833824350454	0.790710037350806	0.798880498338034
CHEMBL1909165	0.869047369774251	0.901580642427324	0.878278746026761	0.916255134141121	0.93744483046206
CHEMBL1909211	0.918613408425321	0.944969579765818	0.912546630414969	0.921990498009307	0.927998928782628
CHEMBL1909214	0.625703926383814	0.789443526226711	0.732981768130962	0.866560401401455	0.742884522058197
CHEMBL1909184	0.70591119569793	0.614545395255628	0.848704853267561	0.572744466776946	0.787892049036639
CHEMBL2354308	0.558876901794969	0.62404459626474	0.567901982406274	0.53071402828667	0.609195556107413
CHEMBL1909181	0.590224383134831	0.794485141033649	0.789326051919335	0.682514241562749	0.811064940449269
CHEMBL1909141	0.902476507696527	0.920012035428192	0.915988145922468	0.907413496800308	0.918493853918519
CHEMBL1909171	0.942864899421596	0.95439661665581	0.944670421337146	0.910369202649506	0.953766138319689
CHEMBL1909150	0.97273490574754	0.987052119993296	0.984835196869165	0.988307170827883	0.991418225289393
CHEMBL1909131	0.926662187270552	0.958621100065967	0.905714139402352	0.922446834956341	0.931774880520128
CHEMBL1963699	0.796971469432518	0.785920668286466	0.797734595627272	0.734697551715368	0.787840390311788
CHEMBL1909106	0.927191443228772	0.958372873228123	0.909669751627416	0.965479422513628	0.932265077803183
CHEMBL1909105	0.898682486150758	0.910827460888894	0.888064627868244	0.901381170119667	0.908090618471049
CHEMBL1909142	0.913701518852682	0.914838683702822	0.96948209790117	0.903857817123046	0.944011529865697
CHEMBL1963829	0.757904803926075	0.800327385196269	0.741270652175186	0.779264632475841	0.743822890506616
CHEMBL1963781	0.674592159805298	0.721336974584254	0.678888501761979	0.715819884888944	0.718253074773546
CHEMBL1909091	0.913272784286623	0.981767477074336	0.964917222769208	0.965941331254207	0.95214797681705
CHEMBL1909145	0.943441943881846	0.985479196903637	0.979625892515779	0.966749397717335	0.979108629034802
CHEMBL1963691	0.711585430887465	0.759089772358831	0.727375004310327	0.742313991173936	0.729429137289088
CHEMBL1909090	0.894427979039908	0.906921244917141	0.897937789883007	0.87934716086269	0.907775299677327
CHEMBL1909205	0.896274922133201	0.94717459290413	0.880952739663751	0.759147022876874	0.878510772366749
CHEMBL1909121	0.960271529636246	0.972539757816599	0.954653470468809	0.93829429194713	0.967756881283564
CHEMBL1963719	0.790807775334026	0.77437144526624	0.777509732613202	0.754173115928578	0.796936999617151
CHEMBL1963703	0.747731757906177	0.783755787522218	0.785968434161053	0.762460463926591	0.796620513796955
CHEMBL1909148	0.63236161986162	0.805776630776631	0.531333943833944	0.809457903207903	0.545389332889333
CHEMBL1738578	0.63516316251623	0.711783767096814	0.638911409633207	0.652767925536734	0.621154273816112
CHEMBL1963837	0.783380157627424	0.816938285274932	0.796447561685937	0.792268915588013	0.794717024582011
CHEMBL1909138	0.876625001620236	0.910425237810991	0.882717416359603	0.877104519422585	0.921334228935118
CHEMBL1738682	0.483554324586852	0.519837532053937	0.538003665884751	0.527579477852542	0.537630529641723
CHEMBL1963740	0.728367249458928	0.754089298572565	0.717975810044631	0.724316803310143	0.722523156374361
CHEMBL1963722	0.800936537262556	0.840120754599454	0.840978583470579	0.806171911014324	0.84238084764225
CHEMBL1963832	0.805481497799979	0.83273103814032	0.827227331282147	0.821448714591792	0.844568897953101
CHEMBL1963775	0.747457318141016	0.754809604000819	0.698074442910187	0.707935026340888	0.695078037947367
CHEMBL1909092	0.918432907204912	0.944730157165185	0.94126140106612	0.950440401334144	0.938804791099161
CHEMBL1909157	0.930610194186818	0.925455122471158	0.901638316913569	0.926678008484919	0.895105527181077
CHEMBL1909134	0.748484005650348	0.775404863581475	0.78945717194096	0.768179025668801	0.767805446761257
CHEMBL1909111	0.942400616291368	0.931161881309463	0.915008660669691	0.910826950849043	0.928624329341835
CHEMBL1909108	0.893204450019728	0.915896772086115	0.890473392067127	0.895046011182046	0.913640897453173
CHEMBL1909085	0.901868850017024	0.932921773243402	0.900671963076457	0.914511312293616	0.909763585561338
CHEMBL1909086	0.935330155679375	0.957712515300226	0.933234428793911	0.951845707651854	0.93435602376413
CHEMBL1909112	0.944579857731698	0.965781068778352	0.941026358201828	0.914352150284516	0.945967692835799
CHEMBL1909159	0.895957526671606	0.914435950752423	0.90076871230199	0.914009821019222	0.908377569436546
CHEMBL2114931	0.664495293648621	0.850098251664902	0.70744129785067	0.777962992498787	0.728343956502801
CHEMBL1964102	0.757106231240309	0.765228542407313	0.809053624835748	0.749492275777192	0.814706186633561
CHEMBL1614063	0.84182098918734	0.932236953499251	0.906272736749412	0.907317097707579	0.889177105841444
CHEMBL1909135	0.880144936017478	0.825944294891802	0.869195081668747	0.766381703859759	0.840093275332917
CHEMBL1909110	0.938358041346339	0.933860810500594	0.928670624999022	0.924548566485047	0.934947220044642
CHEMBL1909200	0.977179311175157	0.946710463211502	0.877848754982642	0.896323997763899	0.871214503279464
CHEMBL1909190	0.937204858610591	0.956054539344184	0.878620760235567	0.935123319885412	0.907418110084335
CHEMBL1963693	0.736345445136244	0.731470135479626	0.715076348902899	0.70834733568517	0.715739488330261
CHEMBL1963918	0.734629173906976	0.791642108599264	0.749716874194323	0.75551160107494	0.781659912055247
CHEMBL1909094	0.929940863241258	0.938943675850791	0.922559896868197	0.903716149475372	0.942685675475531
CHEMBL1963823	0.758876762884591	0.786348081698752	0.745011623949379	0.760509990528172	0.77736577985877
CHEMBL2114932	0.491289100867482	0.501276796108138	0.576538293141693	0.510465506552041	0.587046802369516
CHEMBL1909156	0.943590588155806	0.957717065070006	0.949582006039807	0.942162377264679	0.952310186261593
CHEMBL1909132	0.776527294452296	0.812725812197869	0.778510026435864	0.742253256361464	0.779053236437479
CHEMBL1909130	0.878792468427478	0.913320607478891	0.861939352401503	0.86280502980267	0.905815808779964
CHEMBL3215029	0.841360925658188	0.905497620367346	0.818582240266529	0.865238521286958	0.86192198997805
CHEMBL2114818	0.591734686792036	0.615940035568088	0.622607572725272	0.614257479957156	0.641996660477735
CHEMBL1909107	0.825419657520211	0.854673076005696	0.719286202952339	0.877506834765762	0.785939916455704
CHEMBL1963771	0.759663891986186	0.767963267094046	0.735990509425008	0.757538449615543	0.752585385479868
CHEMBL1909180	0.798542603553802	0.903441893741446	0.837731740699266	0.798219321945526	0.877343254708876
CHEMBL1963725	0.777166421383719	0.781706355812559	0.745706663203717	0.764177600319304	0.776260493119517
CHEMBL1963741	0.737301231207827	0.744790002986701	0.718299161811552	0.736787966682327	0.750270069228443
CHEMBL1909116	0.908402729162568	0.911405433312133	0.95200340420859	0.897155114167578	0.910037267848073
CHEMBL1909109	0.942725742679146	0.945551655176593	0.940078121082958	0.947043580315175	0.945077015505465
CHEMBL1963807	0.758510804911912	0.765205518853272	0.749615846204467	0.734604267382302	0.757023037647319
CHEMBL1909158	0.84785765194397	0.854806455550675	0.774073673538358	0.86674563203895	0.750213443581836
CHEMBL1963772	0.723649172741267	0.728472618566851	0.691411653349616	0.697737510402379	0.729090664343162
CHEMBL1614302	0.63875676785531	0.85995035139285	0.849180185638979	0.894245398081567	0.775933202439775
CHEMBL1909174	0.96006482172856	0.966712210879932	0.953733146720964	0.945203432134629	0.954807301813559
CHEMBL1964002	0.815673176007715	0.885552239782965	0.875793239647429	0.858595776117218	0.886193718381467
CHEMBL1909203	0.907115468235559	0.932052610693309	0.873314186753657	0.868312570114736	0.906568005582067
CHEMBL1909136	0.807118049135629	0.842795652047693	0.797337154485938	0.828952473342903	0.823390405015711
CHEMBL1964107	0.7638209371994	0.816250828318557	0.789289902173289	0.805148146589155	0.787847019595975
CHEMBL1909210	0.86669240220919	0.938176834396794	0.883540592352776	0.917548126476064	0.885110391046876
CHEMBL1794574	0.603989836346035	0.627855454272249	0.644859952152225	0.691426798508801	0.633009068214439
CHEMBL1963757	0.750889056104022	0.799661168529006	0.758100132340262	0.77663789584407	0.777509545064822
CHEMBL1738239	0.619631649454159	0.638055640784387	0.664560123439062	0.593707629526052	0.642326441553197
CHEMBL1963690	0.673051080585327	0.679028840843909	0.630904356075589	0.640120140976305	0.632605711372835
CHEMBL1964101	0.715309485721707	0.737090895402635	0.656663141434621	0.718909112257258	0.689939547345495
CHEMBL1963715	0.699909966081953	0.713617527550396	0.729737514594125	0.718966001473499	0.752191918186209
CHEMBL1909191	0.941859504158122	0.976898860013917	0.967574799910469	0.962824630750893	0.978118509437704
CHEMBL1909201	0.950102646875269	0.936954807382532	0.878694349562581	0.921355834582709	0.851701172951204
CHEMBL1909186	0.735283258494301	0.789123663585085	0.508244693109308	0.507601655865521	0.615860294736431
CHEMBL1963746	0.715502853743051	0.737979286504996	0.722048930991019	0.716198816593082	0.729590802995026
CHEMBL1963913	0.562678133929209	0.765300571515386	0.700998369028377	0.699414404642946	0.759542013133771
CHEMBL1963701	0.677681773470398	0.727009186889888	0.716901097969888	0.685569257305433	0.71871375157557
CHEMBL1963718	0.835878247914738	0.837293772658704	0.82098688579315	0.827206016724135	0.846597689224341
CHEMBL1963726	0.75195968325949	0.773466841474869	0.724191511378023	0.772382469825485	0.75373240154091
CHEMBL1963750	0.736732655789985	0.729763169441203	0.690224803300641	0.67434605825814	0.692822146562287
CHEMBL1737966	0.572989724798682	0.602273202575012	0.590930418532644	0.593285975941159	0.568362422725039
CHEMBL1964015	0.845933101395204	0.872813498683312	0.866551087622831	0.845927887111873	0.87422616538107
CHEMBL1614004	0.722424198327437	0.795056396552712	0.75423284594117	0.754318285419276	0.743114103221379
CHEMBL1909123	0.529321283005494	0.500903774587985	0.904556677890011	0.856668438773702	0.835292102309646
CHEMBL1614041	0.887731883504384	0.958101402933721	0.948078122848397	0.940875654287022	0.946710671321647
CHEMBL1909173	0.935661814315399	0.9386028594476	0.93383281365182	0.896771884466664	0.939975873357858
CHEMBL1614175	0.746537646415937	0.847047116564965	0.819889613792154	0.854906947250029	0.839274231608755
CHEMBL1963830	0.694227354340461	0.73752521227987	0.692551617438302	0.721003849972995	0.715569180845919
CHEMBL1909169	0.852555879252748	0.901449646318589	0.807838588794822	0.876198269815291	0.821460365763011
CHEMBL1963723	0.763540196939467	0.811788856385686	0.771329646750869	0.779079165039875	0.790827871203818
CHEMBL1963972	0.589920732136838	0.640123736066471	0.573847772008377	0.617692334705165	0.606853787029396
CHEMBL1614432	0.632094735627406	0.662509674572467	0.709733863231496	0.678836365299784	0.706234260203094
CHEMBL1964095	0.834102449480265	0.852091555491838	0.827317207574114	0.818542301157557	0.842960281916826
CHEMBL1614524	0.68328113643712	0.793753315340031	0.791193425618833	0.755249281083439	0.808091819029615
CHEMBL2114812	0.702994089834515	0.728579909152977	0.73287608275625	0.522139001518762	0.637840461527029
CHEMBL1738500	0.665015023757209	0.761615089097675	0.748596695875697	0.733736617710839	0.756914132664593
CHEMBL1964104	0.743384155431032	0.75879761225506	0.752210590628603	0.753673789697512	0.744520431462092
CHEMBL3215245	0.862916543062006	0.902813378314385	0.847610544586502	0.841021292024144	0.870852456568216
CHEMBL2114934	0.751061940268658	0.761268049120866	0.717252576098403	0.762208091037519	0.758138043116831
CHEMBL3214915	0.853704609462072	0.882737587557978	0.859956262549467	0.82705526973408	0.867926968538162
CHEMBL1963742	0.757236088312324	0.766980169664538	0.73563115769854	0.734647483587475	0.757729811249627
CHEMBL1909212	0.834325826339043	0.85386526111717	0.817641640036821	0.849963604370007	0.827157062741545
CHEMBL2114916	0.867338233661763	0.958764186327212	0.935117731474874	0.954989773065403	0.945803555921203
CHEMBL1614499	0.667151323827242	0.705511621823496	0.703787061043779	0.699987423481206	0.703295800724956
CHEMBL1613870	0.554308307285035	0.535912534836095	0.541371430559715	0.54234421753695	0.541858791641273
CHEMBL1614019	0.782723957108294	0.819715042721192	0.814801819509023	0.809293253453113	0.810209999540478
CHEMBL3215183	0.874470886478934	0.905681412124662	0.885643166389733	0.86535252526991	0.89935289342988
CHEMBL1963782	0.726310696563158	0.760559679174156	0.750862173896224	0.729499613053392	0.747030022293462
CHEMBL1614169	0.630279126513826	0.862904009844658	0.871949258911461	0.809809775957993	0.859925280080477
CHEMBL2114734	0.742234563296356	0.789298737021394	0.797540304198268	0.814592985263133	0.746029642439564
CHEMBL1963814	0.762788430731132	0.784100864171349	0.787729718273176	0.736917123496082	0.79181106221548
CHEMBL1963999	0.509497915467369	0.543897432415324	0.485714961784162	0.413800840298873	0.522137010275393
CHEMBL2114716	0.760896747358628	0.863555166327612	0.845178394535641	0.843100154612781	0.854821280966634
CHEMBL1614529	0.706693659597834	0.768062427357416	0.758052029305397	0.746834338721319	0.75959826539736
CHEMBL3215004	0.679754066950687	0.718448543581135	0.685002030964245	0.656445154418789	0.675550275631729
CHEMBL2114714	0.777621685450479	0.836412718921959	0.828458177398953	0.817442692850638	0.833012973148961
CHEMBL1614122	0.693459318708397	0.756793240340492	0.730848212935371	0.735804243330587	0.742579844014528
CHEMBL1794366	0.582846184947821	0.622039688074252	0.605875098941589	0.600478444540334	0.625097875707555
CHEMBL1613944	0.705301750401482	0.800098355275781	0.767935508588192	0.776845661613398	0.775428458940381
CHEMBL1613896	0.596426419073008	0.688851076775256	0.663156916909503	0.6826291374872	0.674427550171947
CHEMBL1794523	0.527633919022829	0.502747376023482	0.500012412733591	0.522941580034989	0.510832372862334
CHEMBL1794349	0.690954106757901	0.783099019380201	0.743428141142467	0.731516929865485	0.760495976433393
CHEMBL1963736	0.764744283105814	0.754687435571123	0.765632896457161	0.709135325252422	0.776075716367707
CHEMBL1963835	0.811077549565226	0.823528357767074	0.808027607523447	0.807860408941057	0.804639355175104
CHEMBL1614217	0.610914520616342	0.73303208073564	0.689740721327257	0.733411023660285	0.697829846189053
CHEMBL1963727	0.74593380062443	0.720041588544757	0.717560744567236	0.703707667619453	0.719247449374864
CHEMBL1613820	0.632282615895293	0.691285836456209	0.678782234599487	0.658168583713728	0.684487801080144
CHEMBL1614195	0.65100091553106	0.716268028714235	0.655809263944793	0.706703114274507	0.673168034613152
CHEMBL1614339	0.688940245108407	0.757204542268449	0.76865555445628	0.742630426347755	0.763726267861408
CHEMBL3214953	0.682953315170815	0.806991309982042	0.748051703070984	0.784903677129305	0.766421544046175
CHEMBL3214811	0.77502295029757	0.82520129750143	0.782713147699792	0.757278017665349	0.790263930793341
CHEMBL1266185	0.569061627105671	0.543767199996734	0.555226135977109	0.51192219396601	0.625194877297238
CHEMBL1613924	0.647078933822888	0.694856352471392	0.658304191253534	0.652421726357249	0.661861902124262
CHEMBL3215079	0.772467686889703	0.836257948161425	0.821607546582358	0.810087267052296	0.840806651462048
CHEMBL1614192	0.863048633457636	0.928790137747573	0.898904983424982	0.905853455167753	0.904491924654229
CHEMBL1614285	0.626134537038215	0.71824457011017	0.704187714092333	0.697962266595574	0.696600981799252
CHEMBL1614121	0.575804563721084	0.600587886327234	0.609303278613807	0.607882036983489	0.620631281195702
CHEMBL1614155	0.681589108666515	0.727208354491399	0.687680962295662	0.69202159157727	0.696240834841807
CHEMBL1614201	0.768389731859533	0.820225744206798	0.806274397403948	0.804071925241117	0.820260941293567
CHEMBL1963790	0.775548464612879	0.827972697729743	0.801516911151054	0.792313475871186	0.822846952179182
CHEMBL1738132	0.752035933739998	0.855946982350152	0.829814905967436	0.826922096959669	0.825317518124267
CHEMBL1613794	0.601350561656027	0.655611275680315	0.620175830022764	0.636025967468953	0.636228434856761
CHEMBL1614067	0.607944565968603	0.640041801896178	0.644306649408743	0.647310308082146	0.661985838166623
CHEMBL1963888	0.769507896489813	0.808469184769348	0.795497065993681	0.771030545998726	0.802195728899622
CHEMBL3214967	0.819257743894705	0.901292455730573	0.867761599317745	0.875206748362241	0.884883780318534
CHEMBL3215169	0.86967813905627	0.907618477024431	0.869726902450671	0.87755224662964	0.883679629695266
CHEMBL1738573	0.626042491754396	0.643124405992825	0.576818772023786	0.587695315133397	0.61407557240399
CHEMBL1794310	0.491970215480669	0.478511802861625	0.488824097144576	0.52402559324053	0.498300209946281
CHEMBL1613779	0.690222891100699	0.764675599387467	0.749917602790318	0.779478451746912	0.757738938381639
CHEMBL1614501	0.640240475322545	0.665207184997089	0.6059750349326	0.642244173862747	0.608740437385951
CHEMBL3214913	0.881487044613482	0.925007091516978	0.894618773579672	0.90654307781075	0.91601651601816
CHEMBL1614090	0.627177939090252	0.688551848353929	0.660284383367802	0.656189711826939	0.660531918401709
CHEMBL2114796	0.810397970279968	0.894766454396911	0.870253631297288	0.884953218328	0.891270383607533
CHEMBL1614554	0.572744981775321	0.641693398711014	0.61191829495779	0.629052199684265	0.626001168723907
CHEMBL1614456	0.672711917491245	0.675366464317302	0.575615261253208	0.569856723826119	0.6156019186416
CHEMBL3215073	0.748288597832213	0.755207862553862	0.771016659795743	0.731536462358305	0.769159472416735
CHEMBL1613936	0.666965426574934	0.729550897212309	0.694654483379198	0.7116132668187	0.716521448386595
CHEMBL1613803	0.676056130790038	0.659942214184998	0.588649989370515	0.578596754790528	0.627628748036831
CHEMBL1738598	0.615148799578411	0.677748982822524	0.626558916835912	0.650168904310374	0.630874960108035
CHEMBL1737993	0.772415701521166	0.827233707418658	0.78286898653733	0.80912162957728	0.775576711816565
CHEMBL1614027	0.725955182261923	0.783362500072592	0.760309053137548	0.733150217753286	0.767481635240339
CHEMBL1613792	0.719117307708373	0.848033884073397	0.798954020204512	0.844182604076015	0.816485254348119
CHEMBL1614134	0.693101397583962	0.764870457578241	0.771925775556043	0.758687553738644	0.77457646846427
CHEMBL1614158	0.721417353194423	0.750561033468461	0.779441215555406	0.791575735178839	0.785491599911408
CHEMBL1794496	0.708927009742556	0.837651803286949	0.815967552879059	0.815277209241293	0.830260952832047
CHEMBL1794512	0.714074157194106	0.827975803995374	0.757245047032815	0.801636527951145	0.780946164770566
CHEMBL1614120	0.50840141307357	0.892905054556933	0.939319165791941	0.969769522604793	0.933846613942317
CHEMBL1794324	0.59667632642782	0.758183035539273	0.71169374357872	0.739206330301429	0.717191784618223
CHEMBL1613869	0.609582083345732	0.649607682586914	0.620304383019025	0.641206271729622	0.627380096771833
CHEMBL1040693	0.790178243034743	0.796776709445294	0.756221566275792	0.763143216032872	0.794038877986031
CHEMBL3215046	0.845741503091608	0.893595989076363	0.857012977496573	0.857343137773824	0.869570635006584
CHEMBL1963988	0.708196974229622	0.792568683665835	0.761143014375328	0.752139640355443	0.773994560866049
CHEMBL2114924	0.656363356223779	0.740055871660784	0.727291518448474	0.734727315506884	0.734546943065639
CHEMBL1794426	0.661003543734396	0.78565233224301	0.789505126676835	0.75949720607087	0.767655256450178
CHEMBL1614164	0.632296271402805	0.730811327935801	0.695322922845305	0.68526311638053	0.699369914381972
CHEMBL3214845	0.830685644582541	0.879594414330536	0.836663214546327	0.834948710606755	0.861255579067064
CHEMBL1614252	0.65481791983198	0.691898713446287	0.69881705094754	0.682723319164286	0.705090582664639
CHEMBL1614064	0.827613505238881	0.9060332306767	0.884083025901603	0.872556068116503	0.899215866974107
CHEMBL1614213	0.562260011232514	0.572085917849281	0.596632711479386	0.570093359151719	0.605239778410678
CHEMBL1614307	0.592731781478903	0.722228792622031	0.749031657326348	0.689248704533671	0.774472355392826
CHEMBL1613797	0.573078140564418	0.580161202869924	0.560932690488887	0.552497380987616	0.568903870439832
CHEMBL1614110	0.682524230044864	0.764641002129189	0.725873976981773	0.74177278334254	0.745149262304536
CHEMBL1794536	0.90225535989159	0.936805672632924	0.942550897713699	0.934281895826411	0.944497703831911
CHEMBL1614141	0.727399422747538	0.788825068363761	0.789015689594919	0.750794621790534	0.786752832146767
CHEMBL1614153	0.514478257671112	0.575476439488384	0.548304997263894	0.562274963661732	0.570803187085031
CHEMBL3215270	0.810079555964498	0.919310427496439	0.868930577964234	0.883689980444624	0.890945545686385
CHEMBL1614137	0.626497142085563	0.692565956005712	0.656795636419647	0.668491131681783	0.655224578935705
CHEMBL1613777	0.780218377084628	0.813731185521117	0.801080810793803	0.777160330042063	0.810419904778213
CHEMBL1738569	0.744753561468851	0.789919189275764	0.74270885916028	0.758781284106417	0.744375255107446
CHEMBL1614538	0.695228773850698	0.771685250437751	0.732804727705598	0.743730802246222	0.757942687557907
CHEMBL1614166	0.772901252823082	0.885984457142998	0.881153428442197	0.859397957916781	0.889519889888739
CHEMBL1614263	0.625902283643944	0.705763662301083	0.675045751694066	0.686602458083279	0.684330400431608
CHEMBL1613829	0.556478421476353	0.599652786767428	0.581994380958723	0.587323139989584	0.593381108070783
CHEMBL1613800	0.894697953811462	0.95872061665073	0.969346717419321	0.954861610496813	0.973853766570683
CHEMBL1614481	0.619081742257199	0.65693305058512	0.623895739036442	0.639606173938243	0.641861555394862
CHEMBL1613776	0.543131962638832	0.56277535011945	0.568490671636785	0.547246224623727	0.573941319805439
CHEMBL1614240	0.636610186023022	0.71409774524744	0.697966455151792	0.710573361031127	0.714249036285843
CHEMBL1794486	0.906455393595403	0.955421344079234	0.942508899242326	0.942494049727549	0.950560890947438
CHEMBL1613970	0.72356730258472	0.823146373495543	0.762959721363185	0.776343656454239	0.787884585975817
CHEMBL1613886	0.778889589392196	0.873895244608276	0.846285281120354	0.842190967905194	0.851574964630691
CHEMBL1738606	0.743686400464027	0.81620525117906	0.787471894968128	0.794160483596681	0.804672291810799
CHEMBL2354282	0.704193009577091	0.822140990431078	0.753499436099679	0.765808168080274	0.772714160511047
CHEMBL1614331	0.780829965121115	0.742807439976503	0.757779482993115	0.751571305955437	0.739156514536829
CHEMBL1614531	0.609532869615663	0.662985665910616	0.637276083402802	0.650878217905783	0.646948344337238
CHEMBL3215017	0.852743570430133	0.911681184935756	0.870485503716724	0.883397200640986	0.887282746599625
CHEMBL1613983	0.791997881672315	0.887346435718732	0.860894073986942	0.841375748116601	0.874796276942725
CHEMBL1613930	0.631884208853057	0.734471237858377	0.711920331402674	0.712817018647623	0.718050801160049
CHEMBL1738317	0.872682075678366	0.948781261230115	0.923303401644835	0.927479378223226	0.931894543967021
CHEMBL1614521	0.577908837841479	0.640937908828939	0.635094113096981	0.635586965553005	0.636029066963411
CHEMBL1614108	0.774924623545379	0.887707860354795	0.85667346156141	0.833323780637142	0.862175246052005
CHEMBL1614076	0.674441526419276	0.74761500334655	0.721383534452895	0.720575389677277	0.729735949685502
CHEMBL1614428	0.687277995853612	0.773827303468953	0.756435800282029	0.762327975275417	0.766413244865466
CHEMBL1614453	0.646808898239703	0.716610662910059	0.716479301830608	0.70644930734855	0.735352972007759
CHEMBL1794495	0.721929528472151	0.827173127509233	0.825920763752702	0.874227616139699	0.820736916572094
CHEMBL2114817	0.754421335162761	0.83395561341676	0.818038561888444	0.796589721230326	0.823801707507435
CHEMBL1794569	0.784434483798214	0.881163417525882	0.855377173582397	0.84718546290932	0.867133296329224
CHEMBL2114807	0.851009696090015	0.928349227934842	0.884750801644465	0.903249220134471	0.906797001805222
CHEMBL1614227	0.63010508546874	0.700326232247163	0.681723959335844	0.680697239257107	0.689672489417384
CHEMBL1613995	0.728077455809215	0.819760672361719	0.777214762948999	0.791715084737413	0.782767428311983
CHEMBL1614414	0.58838900040969	0.622584801986281	0.604061176713907	0.602110531404804	0.605075862847591
CHEMBL1613996	0.753082302712149	0.805439192358534	0.806983051365802	0.803971640973414	0.804828097528038
CHEMBL1613808	0.604139697037979	0.645047530804212	0.651606662240553	0.641406440130558	0.650214518769071
CHEMBL1794461	0.792653671348266	0.896239397026398	0.879800333545452	0.872360960467883	0.882525480083028
CHEMBL2114836	0.830577665626991	0.935198467048074	0.894683877942675	0.9197225067957	0.906231921046185
CHEMBL1614052	0.624897162770302	0.660846781663167	0.641246411366425	0.610978562010846	0.654182024198836
CHEMBL1614234	0.749961029810999	0.864730653469915	0.814118958541693	0.820687509172329	0.839561542517861
CHEMBL1613992	0.646481918551711	0.732537366725281	0.683284313154967	0.711240489546129	0.695599243007797
CHEMBL1614103	0.576892592533346	0.598664824636128	0.618958766193439	0.598194113990801	0.63194441282515
CHEMBL2114738	0.745263207166273	0.795225325653184	0.785126100295462	0.772518817716878	0.802701780942075
CHEMBL1794585	0.897980066374442	0.890354742706811	0.863182360850525	0.899296702378793	0.890610559544626
CHEMBL1614364	0.719750676788906	0.794605121354743	0.767268416930144	0.764886223533287	0.784807298343336
CHEMBL1794311	0.79003151271812	0.894603931098369	0.858462036156792	0.871203381697718	0.874425012425238
CHEMBL1963935	0.888585149651326	0.936756582618101	0.928948707264301	0.887698978693866	0.935452156038461
CHEMBL2114713	0.694365182283542	0.774771609256961	0.747348680279235	0.754016141096138	0.755594083567385
CHEMBL1614281	0.617943747932855	0.659983707536208	0.646479424581791	0.628714276850864	0.655700730565405
CHEMBL2114861	0.831729620105004	0.942040238344587	0.898548767700373	0.923227687226731	0.920855033922062
CHEMBL3215278	0.760829694468704	0.860408663642765	0.824069166967728	0.828223176709002	0.840204851756688
CHEMBL2114784	0.850671635605955	0.946150174598436	0.896310733039212	0.907498921386229	0.920366034386623
CHEMBL1614031	0.581909594210904	0.612024391719947	0.610726798454056	0.605399225822635	0.619701263531648
CHEMBL1614275	0.711910820007413	0.807584043480708	0.764119375369735	0.781820911933218	0.782864238429992
CHEMBL1794440	0.897230819428276	0.980109245891263	0.966342693536387	0.9731446882396	0.986065321128823
CHEMBL1964014	0.775768114749025	0.785962065247217	0.79370064846105	0.763815249192681	0.8129637790685
CHEMBL1613910	0.641462314051724	0.737905425782161	0.690992706793201	0.711777795517676	0.701715943268808
CHEMBL1963954	0.871907642865311	0.906519970844001	0.916048589867867	0.878867177360816	0.919511729946289
CHEMBL1964086	0.808801904342253	0.840052008211945	0.855301104772301	0.801402044444836	0.854290179974627
CHEMBL1964062	0.859701367530579	0.889781656808785	0.890319912744852	0.850803464143958	0.895259886208816
CHEMBL1963887	0.865074110068759	0.884331417020063	0.897125179479047	0.853457643560082	0.899635561200007
CHEMBL1614280	0.686983962642863	0.748769463341916	0.743248687483423	0.731257467635485	0.754185735240989
CHEMBL1963848	0.866653028590488	0.90662351742331	0.899619508545095	0.866435938801318	0.909537678962977
CHEMBL1963889	0.84436673816792	0.895210152181444	0.893854396577108	0.853496478465017	0.893207333874528
CHEMBL1741321	0.763817073926215	0.834994078961334	0.815713976083902	0.806664179228028	0.835718045125366
CHEMBL1614250	0.565505822177293	0.593514607406956	0.58093356464012	0.594849721073196	0.595073446867451
CHEMBL1614361	0.558906818507813	0.588569234419617	0.584469117621914	0.583099520134718	0.600948980277714
CHEMBL1741325	0.803155693974529	0.859637313667558	0.852512274458602	0.834418493230145	0.859699414601776
CHEMBL2354287	0.751459843618396	0.838277515792985	0.800250083446798	0.804471199948329	0.818231986732751
CHEMBL1614502	0.72785242296813	0.807187449980362	0.764032611314621	0.7594445383969	0.792324221342253
CHEMBL1614342	0.863858239513636	0.940755397625274	0.903391615887041	0.92054070562216	0.917904582976399
CHEMBL1741323	0.803801855303279	0.864223581505219	0.851352664798603	0.836946945832608	0.863551587010301
CHEMBL1963963	0.850706024729683	0.88777137927822	0.89086244334259	0.847732244177311	0.890608718399827
CHEMBL1794584	0.80829055376935	0.897093474041101	0.851746233342215	0.863878713208267	0.877446482187337
CHEMBL1613918	0.617197198563185	0.658403946097948	0.643733119579541	0.642365679592947	0.654942915684066
CHEMBL1741322	0.851953065777015	0.915933443634939	0.891674487552691	0.889515693379117	0.906959764280138
CHEMBL1964074	0.866570207002499	0.893343690250014	0.896328835500773	0.86078519793769	0.903604670988074
CHEMBL2114913	0.62752367641932	0.753462881434428	0.691546635848386	0.700266788380893	0.726969403827481
CHEMBL1741324	0.809203344150092	0.87981551029424	0.865386951590342	0.847784379994172	0.876087966063588
CHEMBL1614410	0.549341988067098	0.578462860788116	0.560645213043546	0.56729937789335	0.545012879605417
CHEMBL1613838	0.86752026120189	0.939404010839624	0.900123512931032	0.921183731143917	0.917640827409468
CHEMBL1794424	0.837850094779046	0.939779268091915	0.91681263935991	0.913124212150129	0.929464357196192
CHEMBL2114775	0.839189231023447	0.925836337505984	0.900526217097716	0.89368849115376	0.908684874022017
CHEMBL1614079	0.62840612241029	0.671529568938534	0.669222037291159	0.657831226714009	0.675586609308386
CHEMBL1614038	0.74332305894239	0.847885475435278	0.808263397141542	0.826098779226743	0.823178960346108
CHEMBL1737991	0.913849579026265	0.982074555080913	0.966830028866733	0.969135669664219	0.975309604152731
CHEMBL2114843	0.77789346408762	0.851911479608473	0.83023406480776	0.825601018755335	0.842585222316737
CHEMBL1614211	0.827593023339546	0.888618340016558	0.890267930533431	0.888032497928006	0.893757531574468
CHEMBL1964017	0.844417483026206	0.876625776062743	0.886833954032405	0.841625023002853	0.899877182691647
CHEMBL1964099	0.805036156720859	0.856469149504192	0.865846037425994	0.827544457543435	0.878936243841242
CHEMBL1963885	0.841235812177538	0.874190055067364	0.876091959978157	0.843917187112113	0.890523639478423
CHEMBL2114788	0.87615355155182	0.948358781370719	0.935820593092814	0.911080878925308	0.942652176701585
CHEMBL1613769	0.720419106469956	0.78909367582553	0.735923959893126	0.74740217522253	0.773215182190451
CHEMBL1613836	0.776862451463021	0.869052094482392	0.829984282785062	0.855964347443574	0.847958897432202
CHEMBL1614174	0.639331906219271	0.711440762117682	0.686962936137822	0.69366683256256	0.698685426534474
CHEMBL1963976	0.828858323853576	0.857348314818908	0.861798531229424	0.831618038965193	0.871553503586392
CHEMBL1963900	0.806912120582047	0.830825090355891	0.852733318342288	0.803038675563412	0.86328119556248
CHEMBL1738312	0.844215916508812	0.945585662450194	0.918560139353313	0.926828320772948	0.933327060374837
CHEMBL1614544	0.636068420624475	0.700622090712796	0.687194837590516	0.6693593306351	0.699451168920052
CHEMBL1794352	0.811090137684887	0.906383669646044	0.865517359605994	0.874225686157673	0.874908094813172
CHEMBL1963945	0.801728635632185	0.834979800102506	0.845448407392622	0.791477534385545	0.861078044347277
CHEMBL1964045	0.822432159974661	0.862457303890012	0.862336764729208	0.839774289076842	0.879826218068735
CHEMBL1964063	0.846836484927455	0.871078258842729	0.880005982947912	0.841375433592631	0.892740415575479
CHEMBL2114780	0.743460897292676	0.805204454861229	0.796900804264261	0.793929004264259	0.806591634394645
CHEMBL1614236	0.73032491733774	0.804755780590124	0.753557773042123	0.752366870856132	0.792241366891718
CHEMBL1614161	0.648343005040339	0.727658215086117	0.698709492627059	0.703852673734987	0.711415056001206
CHEMBL1963882	0.821863363683829	0.856775244785449	0.85728760242865	0.817477854186172	0.867648106731482
CHEMBL1964034	0.816862800634139	0.85560648379858	0.865305258806893	0.815272344922377	0.873273237977762
CHEMBL1613914	0.710557302001643	0.770659670549378	0.760918213501893	0.766956152654764	0.769186819293714
CHEMBL1963921	0.821653230200153	0.858264466620377	0.860348024958756	0.829450596166943	0.870818764012543
CHEMBL1614441	0.636004548986912	0.712847977452621	0.67448231533239	0.692958983422021	0.688322162289193
CHEMBL3215181	0.884704617677782	0.94737245417048	0.933959354162363	0.924619951509385	0.937659265052741
CHEMBL1614257	0.673020236154062	0.717188109261539	0.697415746757375	0.691250626354306	0.710778182971986
CHEMBL1964009	0.810115767330599	0.847641397611242	0.851255551133723	0.814247543151652	0.868337515268617
CHEMBL1963991	0.809154183551993	0.831491502379797	0.840916163007053	0.799370246946103	0.851253824743849
CHEMBL1613842	0.758762225843862	0.833971372148263	0.793163807937785	0.804795183437053	0.810018587462385
CHEMBL1964075	0.815619767092364	0.852063743566133	0.848710221949131	0.823169494204418	0.865560565539663
CHEMBL1963860	0.825776075934829	0.858797897425952	0.863735410182922	0.831667171176517	0.868655171807676
CHEMBL1964065	0.792569734504222	0.823360638531174	0.819801112902959	0.791362440324917	0.834804305563554
CHEMBL1964087	0.862075198530821	0.886708227533377	0.895269624104365	0.85704013838948	0.908849835145019
CHEMBL1963895	0.846339846814892	0.880998384648917	0.887971898972895	0.845277857280778	0.896050891062832
CHEMBL1964092	0.831652545187982	0.869505654090459	0.866374562273339	0.829577772779091	0.884053221267535
CHEMBL1963994	0.785718580364977	0.813676765206007	0.810988067877999	0.781879362406913	0.828353580982347
CHEMBL1964025	0.828730624418714	0.850228605110257	0.86386555066169	0.820755057866472	0.875547306645729
CHEMBL1964004	0.83493032390992	0.868001677155386	0.879904469710666	0.831659041112127	0.889905110673618
CHEMBL1963866	0.778952780547118	0.808018098983024	0.836725062534296	0.78316561704167	0.844834653143154
CHEMBL1963903	0.834984956580007	0.868907757280386	0.873025268416572	0.830406687832012	0.882333656575477
CHEMBL1964066	0.834817154817513	0.873128433461865	0.882498716315426	0.84072741916464	0.893315681997556
CHEMBL1964037	0.825202917069303	0.86140731825927	0.861376189343943	0.827198822433981	0.871135435982595
CHEMBL1964018	0.840667963322444	0.876190853596508	0.876429429832725	0.845526194262039	0.888917922632368
CHEMBL1963844	0.822820212956779	0.861651492392112	0.867875569493461	0.829574288279206	0.881037163704413
CHEMBL1964091	0.831809430068942	0.866112797336891	0.867678787167857	0.832876627922357	0.880071830455752
CHEMBL1964049	0.83958929138634	0.876190311170764	0.890542971444687	0.854298250170954	0.906053299324305
CHEMBL1963911	0.808723548293264	0.853115287350829	0.854284028223884	0.825772398603509	0.869441877488477
CHEMBL1964059	0.869433800647464	0.890520624048361	0.898059823103073	0.851442470834061	0.911855835610544
CHEMBL1963961	0.803974377698757	0.838491725661743	0.826933906422639	0.800846074876386	0.847209736820001
CHEMBL1964043	0.84965386276674	0.887952662246786	0.886982243045831	0.846985702905804	0.897767638285407
CHEMBL1964021	0.84239724305155	0.863596267572718	0.867354823397211	0.83440107722676	0.881721700169319
CHEMBL1964085	0.834126703419502	0.878206406639025	0.875975307071364	0.844510247038002	0.88994096373485
CHEMBL1963880	0.839332773652418	0.870731174406	0.883292427255966	0.839099775289516	0.896617187090557
CHEMBL1964040	0.81937861461873	0.848625598591624	0.841952202107947	0.813703502599676	0.858828390722166
CHEMBL1964088	0.826273148230663	0.854302199954009	0.851567496363592	0.817408149266881	0.86831592927689
CHEMBL1964007	0.855140704889104	0.88823806403915	0.885688480124054	0.852815885667415	0.903309808780025
CHEMBL1964047	0.859103363719125	0.88857137586867	0.887011184635886	0.852264537569253	0.901592628999446
CHEMBL1963901	0.860834421725424	0.887171636903881	0.884850181374063	0.846997380797106	0.896806180640324
CHEMBL1614421	0.742470264817893	0.833958881703728	0.802445516607267	0.799791335901669	0.81287256054194
CHEMBL1963990	0.801726434040499	0.847338073583551	0.845490875124767	0.812241679864111	0.861188999810951
CHEMBL1963876	0.862009045158808	0.882672943215211	0.885458632243419	0.85006897317862	0.899639025796734
CHEMBL1963989	0.853633241711978	0.88958608364851	0.890199023891779	0.858829318247282	0.903446780981948
CHEMBL1614249	0.642449646582586	0.678192188250669	0.649764323221422	0.653631775812568	0.671446725532796
CHEMBL1963953	0.846075518511001	0.884807832165935	0.881734882896259	0.851840843049759	0.892376358410274
CHEMBL1963854	0.856553660133473	0.887796977515521	0.891799576278715	0.853471127479997	0.904540280519433
CHEMBL1963985	0.855630313369482	0.882447526674441	0.887861603655063	0.840452470864687	0.900872467319396
CHEMBL1964030	0.820079063425254	0.849284149530846	0.8432152028096	0.810739459773641	0.855805528102526
CHEMBL1963960	0.86063180630254	0.881420778814857	0.879242846151276	0.846392818546678	0.895205923010171
CHEMBL1963929	0.827871931672442	0.859526729376751	0.867615691337226	0.830135834601997	0.876330856206075
CHEMBL1964006	0.851650116620098	0.885007404712205	0.875496843044282	0.845857098332268	0.886930934306525
CHEMBL1963868	0.830927929437173	0.86632188913424	0.865168248314539	0.840570297424468	0.881279953505024
CHEMBL1963922	0.849900608870404	0.877129478336352	0.881622907703223	0.841350374168309	0.893277171804214
CHEMBL1964077	0.833446896317287	0.86078949999344	0.867256607795177	0.831593728184562	0.878810110251591
CHEMBL1964048	0.84688750943394	0.889973095864317	0.886696361799444	0.850494610841854	0.898699466052552
CHEMBL1964012	0.842638586714375	0.876875334747042	0.869937496607658	0.837522074935374	0.883372294758116
CHEMBL3215106	0.637822437945387	0.716943206215721	0.684352171024274	0.684954730173726	0.699040937435655
CHEMBL1614087	0.692776743555668	0.765369474457904	0.747705749777302	0.745973097732943	0.757042170934775
CHEMBL2114810	0.729276853390256	0.847899077202341	0.827944427465516	0.812232614741095	0.843561370840696
CHEMBL1963874	0.838701285696275	0.876646169677231	0.869319080505708	0.834528763943769	0.883154168375094
CHEMBL1964072	0.854579330500803	0.88241218341083	0.880117867746331	0.848204327092629	0.892912038132627
CHEMBL1963981	0.854767641397666	0.887086138630705	0.88857328622097	0.856542957560803	0.90219870654594
CHEMBL2354254	0.819338158801202	0.891279082076572	0.857257069419535	0.841090238981214	0.879365353140208
CHEMBL1614530	0.585324589833353	0.639042544210647	0.617093822637476	0.621373297957333	0.625158856088491
CHEMBL1738442	0.804573502863194	0.910953665559998	0.8709123689145	0.883836570634858	0.887819380202745
CHEMBL1794553	0.706496493841419	0.768120066413775	0.749728323099967	0.74517002825794	0.770832778598231
CHEMBL1614458	0.643960122430786	0.728635260983399	0.698392481382268	0.704875807890593	0.707843777169365
CHEMBL2354221	0.834578979924392	0.904914250250289	0.868411097014624	0.863705392099466	0.892837330897952
CHEMBL1614459	0.520981822637951	0.534132095067912	0.560768989002237	0.526458453088206	0.553495027827454
CHEMBL1794345	0.710839495227787	0.764354698463423	0.743017217959717	0.732810682399928	0.757776929812787
CHEMBL1794580	0.84978386808758	0.925901456160547	0.899837095008421	0.894684287885739	0.913647493332287
CHEMBL1794401	0.87896487011877	0.945404206398748	0.936072395345721	0.934351590751922	0.944799343837541
CHEMBL1794483	0.802976349681106	0.867000649541948	0.858862862960767	0.855450802305137	0.870172586350116
