# Supplementary material for: Large-scale comparison of machine learning methods for drug target prediction on ChEMBL
Source: Royal Society of Chemistry journal article supplement (doi:10.1039/c8sc00148k), 2018-01-01
Supplement: c8sc00148k4.csv [file c8sc00148k4.csv]

	StaticF: fold0	StaticF: fold1	StaticF: fold2	SemiF: fold0	SemiF: fold1	SemiF: fold2	ECFP6: fold0	ECFP6: fold1	ECFP6: fold2	DFS8: fold0	DFS8: fold1	DFS8: fold2	ECFP6+ToxF: fold0	ECFP6+ToxF: fold1	ECFP6+ToxF: fold2
CHEMBL1614338	0.607142857142857	0.285714285714286	0.564102564102564	0.678571428571429	0.285714285714286	0.923076923076923	0.785714285714286	1	0.948717948717949	0.642857142857143	0.857142857142857	0.769230769230769	0.821428571428571	0.428571428571429	0.897435897435898
CHEMBL1243971	0.654320987654321	0	1	0.83641975308642	0	0.444444444444444	0.691358024691358	0	0.555555555555556	0.589506172839506	0.5	0.444444444444444	0.527777777777778	0	0.555555555555556
CHEMBL1614044	0.725	0.643939393939394	0.5546875	0.95	0.939393939393939	0.5625	0.675	0.893939393939394	0.5625	0.925	0.931818181818182	0.765625	0.925	0.96969696969697	0.53125
CHEMBL2045986	0.888888888888889	0.828571428571429	1	1	0.609523809523809	0.982758620689655	1	0.819047619047619	1	1	0.666666666666667	1	1	0.885714285714286	0.982758620689655
CHEMBL618396	0.868421052631579	0.959677419354839	0.928571428571429	0.964912280701754	1	1	0.842105263157895	1	1	0.964912280701754	0.983870967741935	1	0.842105263157895	0.989247311827957	1
CHEMBL3079731	0.421052631578947	0.25	0.764705882352941	0.593984962406015	0	0.764705882352941	0.646616541353384	0.15	0.647058823529412	0.740601503759398	0.6	0.970588235294118	0.571428571428571	0.15	0.705882352941176
CHEMBL1794498	0.935	0.958333333333333	0.968253968253968	0.9275	0.989583333333333	0.955026455026455	0.925	0.989583333333333	0.94973544973545	0.9425	0.979166666666667	0.931216931216931	0.93	0.979166666666667	0.939153439153439
CHEMBL2091156	0.866666666666667	0.865740740740741	0.914285714285714	0.7	0.877314814814815	0.971428571428571	0.8	0.893518518518518	0.957142857142857	0.966666666666667	0.820601851851852	0.957142857142857	0.8	0.886574074074074	0.942857142857143
CHEMBL2363253	0.69047619047619	0.54375	0.659090909090909	0.755952380952381	0.63125	0.825757575757576	0.744047619047619	0.66875	0.818181818181818	0.642857142857143	0.4625	0.666666666666667	0.714285714285714	0.55625	0.75
CHEMBL1738192	0.66	0.830128205128205	0.945	0.48	0.92948717948718	0.97	0.56	0.778846153846154	1	0.61	0.69551282051282	0.99	0.77	0.865384615384615	1
CHEMBL1614154	0.626262626262626	0.930232558139535	0.789473684210526	0.919191919191919	1	1	0.696969696969697	1	0.842105263157895	0.686868686868687	0.918604651162791	1	0.868686868686869	0.790697674418605	1
CHEMBL1964055	0.822916666666667	0.706896551724138	0.85632183908046	0.979166666666667	0.620689655172414	0.867816091954023	0.4375	0.620689655172414	0.64367816091954	0.927083333333333	0.0689655172413793	0.850574712643678	0.864583333333333	0.793103448275862	0.735632183908046
CHEMBL2363800	0.401785714285714	0.518181818181818	0.46875	0.464285714285714	0.468181818181818	0.5875	0.633928571428571	0.581818181818182	0.51875	0.4375	0.413636363636364	0.51875	0.535714285714286	0.6	0.56875
CHEMBL1794420	0.921717171717172	0.857142857142857	0.94973544973545	0.876262626262626	0.933333333333333	0.928571428571428	0.876262626262626	0.971428571428571	0.923280423280423	0.892676767676768	0.942857142857143	0.939153439153439	0.904040404040404	0.971428571428571	0.920634920634921
CHEMBL2363263	0.398148148148148	0.611570247933884	0.543956043956044	0.564814814814815	0.669421487603306	0.582417582417582	0.657407407407407	0.677685950413223	0.510989010989011	0.657407407407407	0.570247933884298	0.631868131868132	0.694444444444444	0.644628099173554	0.582417582417582
CHEMBL2363552	0.578231292517007	0.87012987012987	0.71900826446281	0.612244897959184	0.896103896103896	0.834710743801653	0.714285714285714	0.896103896103896	0.760330578512397	0.741496598639456	0.779220779220779	0.677685950413223	0.700680272108843	0.987012987012987	0.727272727272727
CHEMBL2363168	0.648888888888889	0.73	0.767857142857143	0.768888888888889	0.85	0.866071428571428	0.675555555555555	0.715	0.6875	0.448888888888889	0.675	0.696428571428571	0.657777777777778	0.87	0.714285714285714
CHEMBL3214806	0.571428571428571	0.588235294117647	0.625	0.8	0.661764705882353	0.78	0.914285714285714	0.897058823529412	0.94	0.7	0.889705882352941	0.89	0.914285714285714	0.794117647058824	0.92
CHEMBL1794455	0.944862155388471	0.819047619047619	0.973262032085561	0.942355889724311	0.971428571428572	0.951871657754011	0.897243107769424	0.980952380952381	0.941176470588235	0.949874686716792	0.952380952380952	0.925133689839572	0.934837092731829	0.971428571428571	0.946524064171123
CHEMBL1613998	0.620689655172414	0.426470588235294	0.658163265306122	0.737931034482759	0.788235294117647	0.627551020408163	0.758620689655172	0.417647058823529	0.51530612244898	0.675862068965517	0.705882352941176	0.729591836734694	0.744827586206897	0.588235294117647	0.474489795918367
CHEMBL1614056	0.7325	0.496031746031746	0.891666666666667	0.92	0.619047619047619	0.966666666666667	0.79	0.682539682539683	0.855555555555556	0.935	0.571428571428571	0.961111111111111	0.87	0.738095238095238	0.866666666666667
CHEMBL1613903	0.545112781954887	0.423529411764706	0.445238095238095	0.620300751879699	0.435294117647059	0.611904761904762	0.620300751879699	0.376470588235294	0.571428571428571	0.601503759398496	0.576470588235294	0.571428571428572	0.593984962406015	0.505882352941176	0.621428571428571
CHEMBL2363184	0.513888888888889	0.532407407407407	0.6	0.583333333333333	0.587962962962963	0.833333333333333	0.625	0.574074074074074	0.9	0.465277777777778	0.462962962962963	0.616666666666667	0.638888888888889	0.550925925925926	0.925
CHEMBL1738619	0.574074074074074	0.571428571428571	0.477011494252874	0.685185185185185	0.658730158730159	0.793103448275862	0.740740740740741	0.69047619047619	0.609195402298851	0.62962962962963	0.75	0.689655172413793	0.740740740740741	0.611111111111111	0.637931034482759
CHEMBL2363227	0.544444444444445	0.578512396694215	0.580246913580247	0.788888888888889	0.607438016528926	0.777777777777778	0.772222222222222	0.512396694214876	0.746913580246914	0.655555555555556	0.466942148760331	0.709876543209876	0.755555555555556	0.56198347107438	0.790123456790123
CHEMBL1738514	0.626373626373626	0.561818181818182	0.599033816425121	0.571428571428572	0.578181818181818	0.739130434782609	0.521978021978022	0.407272727272727	0.516908212560387	0.642857142857143	0.450909090909091	0.560386473429952	0.483516483516484	0.432727272727273	0.458937198067633
CHEMBL2114927	0.0645161290322581	0.527173913043478	0.302083333333333	0.193548387096774	0.657608695652174	0.517361111111111	0.451612903225806	0.559782608695652	0.59375	0.225806451612903	0.505434782608696	0.829861111111111	0.419354838709677	0.684782608695652	0.552083333333333
CHEMBL763093	0.81140350877193	0.662004662004662	0.928571428571429	0.903508771929824	0.792540792540792	1	0.785087719298246	0.687645687645688	0.857142857142857	0.855263157894737	0.662004662004662	0.904761904761905	0.837719298245614	0.608391608391608	0.952380952380952
CHEMBL1614525	0.645454545454546	0.755208333333333	0.587962962962963	0.731818181818182	0.666666666666667	0.796296296296296	0.652272727272727	0.609375	0.865740740740741	0.668181818181818	0.671875	0.726851851851852	0.693181818181818	0.630208333333333	0.810185185185185
CHEMBL2114803	0.875	0.818518518518518	0.765625	0.894444444444444	0.859259259259259	0.822916666666667	0.872222222222222	0.87037037037037	0.822916666666667	0.777777777777778	0.796296296296296	0.833333333333333	0.855555555555556	0.903703703703704	0.817708333333333
CHEMBL1613775	0.84045584045584	0.760204081632653	0.766666666666667	0.94017094017094	0.913265306122449	0.853333333333333	0.886039886039886	0.938775510204082	0.856666666666667	0.911680911680912	0.923469387755102	0.876666666666667	0.866096866096866	0.857142857142857	0.866666666666667
CHEMBL1614373	0.342948717948718	0.375	0.458333333333333	0.576923076923077	0.5625	0.488636363636364	0.516025641025641	0.625	0.503787878787879	0.55448717948718	0.729166666666667	0.496212121212121	0.580128205128205	0.641666666666667	0.549242424242424
CHEMBL1614070	0.769230769230769	0.333333333333333	0.75	0.730769230769231	0.888888888888889	0.5	0.384615384615385	1	0.75	0.5	0.777777777777778	0.666666666666667	0.538461538461539	0.222222222222222	1
CHEMBL1026934	1	0.979591836734694	1	0.975308641975309	0.979591836734694	1	1	0.979591836734694	1	1	0.989795918367347	0.96	0.987654320987654	0.959183673469388	0.96
CHEMBL1026933	0.942857142857143	1	0.9	0.914285714285714	1	0.95	0.857142857142857	1	0.9	1	1	0.95	0.942857142857143	1	1
CHEMBL2363723	0.529411764705882	0.666666666666667	0.68	0.613445378151261	0.616161616161616	0.84	0.789915966386554	0.611111111111111	0.746666666666667	0.596638655462185	0.616161616161616	0.766666666666667	0.80672268907563	0.646464646464647	0.793333333333333
CHEMBL864855	0.833333333333333	0.333333333333333	0.344907407407407	0.666666666666667	0.333333333333333	0.56712962962963	0.583333333333333	0.666666666666667	0.636574074074074	1	0.333333333333333	0.671296296296296	0.583333333333333	0.666666666666667	0.268518518518518
CHEMBL772766	0.791666666666667	0.476190476190476	0.488888888888889	0.802083333333333	0.425595238095238	0.777777777777778	0.854166666666667	0.735119047619048	0.6	0.666666666666667	0.586309523809524	0.466666666666667	0.791666666666667	0.666666666666667	0.666666666666667
CHEMBL806152	0.909090909090909	0.938461538461538	0.9	0.863636363636364	0.915384615384615	0.933333333333333	0.863636363636364	0.953846153846154	0.8	0.772727272727273	0.946153846153846	0.733333333333333	0.863636363636364	0.961538461538461	0.816666666666667
CHEMBL1613812	0.720930232558139	0.8125	0.6875	0.930232558139535	0.416666666666667	0.9375	0.953488372093023	0.583333333333333	0.625	0.930232558139535	0.791666666666667	0.9375	0.976744186046512	0.666666666666667	0.6875
CHEMBL2363265	0.594444444444444	0.735537190082645	0.631868131868132	0.927777777777778	0.690082644628099	0.763736263736264	0.788888888888889	0.710743801652893	0.582417582417582	0.822222222222222	0.553719008264463	0.692307692307692	0.788888888888889	0.590909090909091	0.620879120879121
CHEMBL1024480	0.777777777777778	1	0.48	0.222222222222222	0.777777777777778	0.466666666666667	0.777777777777778	0	0.6	0.888888888888889	0.777777777777778	0.28	0.777777777777778	0.111111111111111	0.44
CHEMBL2363541	0.494444444444444	0.445887445887446	0.535714285714286	0.677777777777778	0.571428571428571	0.615079365079365	0.783333333333333	0.658008658008658	0.551587301587302	0.572222222222222	0.45021645021645	0.527777777777778	0.816666666666667	0.575757575757576	0.53968253968254
CHEMBL1614177	0.392857142857143	0.828571428571429	0.942528735632184	0.535714285714286	0.971428571428571	0.839080459770115	0.714285714285714	0.857142857142857	0.67816091954023	0.535714285714286	1	0.977011494252874	0.571428571428571	0.971428571428571	0.850574712643678
CHEMBL1804798	0.941176470588235	0.94047619047619	0.945454545454545	0.882352941176471	0.94047619047619	0.9	0.980392156862745	0.928571428571429	0.918181818181818	0.92156862745098	0.952380952380952	0.845454545454545	0.980392156862745	0.916666666666667	0.977272727272727
CHEMBL3111191	0.462962962962963	0.321818181818182	0.4	0.638888888888889	0.532727272727273	0.2	0.37962962962963	0.352727272727273	0	0.462962962962963	0.372727272727273	0	0.361111111111111	0.285454545454545	0
CHEMBL1031359	0.8	0.666666666666667	1	0.2	0.666666666666667	1	1	0.5	1	0.975	0.5	0.77	0.975	0.5	1
CHEMBL2363544	0.692307692307692	0.384615384615385	0.575892857142857	0.647058823529412	0.513986013986014	0.553571428571429	0.705882352941177	0.374125874125874	0.4375	0.570135746606335	0.363636363636364	0.584821428571428	0.6289592760181	0.391608391608392	0.482142857142857
CHEMBL2363339	0.685714285714286	0.638888888888889	0.569444444444444	0.628571428571429	0.677777777777778	0.736111111111111	0.8	0.788888888888889	0.729166666666667	0.578571428571429	0.538888888888889	0.736111111111111	0.785714285714286	0.727777777777778	0.715277777777778
CHEMBL2363169	0.676136363636364	0.775	0.478632478632479	0.704545454545455	0.875	0.794871794871795	0.761363636363636	0.8	0.837606837606838	0.471590909090909	0.8	0.641025641025641	0.710227272727273	0.770833333333333	0.82051282051282
CHEMBL2363165	0.632352941176471	0.625	0.5	0.774509803921569	0.852941176470588	0.871794871794872	0.642156862745098	0.786764705882353	0.5	0.53921568627451	0.654411764705882	0.730769230769231	0.705882352941176	0.727941176470588	0.474358974358974
CHEMBL1738313	0.652380952380952	0.55952380952381	0.630434782608696	0.842857142857143	0.642857142857143	0.722408026755853	0.723809523809524	0.556547619047619	0.57190635451505	0.842857142857143	0.654761904761905	0.698996655518395	0.714285714285714	0.705357142857143	0.565217391304348
CHEMBL2363531	0.612121212121212	0.570247933884298	0.666666666666667	0.642424242424242	0.512396694214876	0.736111111111111	0.684848484848485	0.65702479338843	0.694444444444444	0.56969696969697	0.396694214876033	0.770833333333333	0.660606060606061	0.599173553719008	0.729166666666667
CHEMBL2363621	0.595959595959596	0.607142857142857	0.714285714285714	0.565656565656566	0.632142857142857	0.726190476190476	0.707070707070707	0.607142857142857	0.726190476190476	0.580808080808081	0.596428571428571	0.694444444444444	0.671717171717172	0.614285714285714	0.682539682539683
CHEMBL1614265	0.775735294117647	0.795454545454545	0.852272727272727	0.463235294117647	0.825757575757576	0.664772727272727	0.75	0.696969696969697	0.704545454545455	0.463235294117647	0.590909090909091	0.835227272727273	0.602941176470588	0.78030303030303	0.767045454545455
CHEMBL1738092	0.291666666666667	0.387755102040816	0.703703703703704	0.677083333333333	0.518367346938776	0.437037037037037	0.4375	0.497959183673469	0.444444444444444	0.708333333333333	0.595918367346939	0.8	0.447916666666667	0.457142857142857	0.437037037037037
CHEMBL1614380	0.823529411764706	0.773076923076923	0.774603174603175	0.92156862745098	0.923076923076923	0.80952380952381	0.92156862745098	0.969230769230769	0.879365079365079	0.843137254901961	0.796153846153846	0.825396825396825	0.843137254901961	0.888461538461538	0.863492063492063
CHEMBL2363420	0.697115384615385	0.633333333333333	0.6125	0.947115384615385	0.754166666666667	0.808333333333333	0.706730769230769	0.645833333333333	0.666666666666667	0.754807692307692	0.683333333333333	0.729166666666667	0.711538461538462	0.6125	0.675
CHEMBL2354307	0.550943396226415	0.601449275362319	0.767676767676768	0.658490566037736	0.594202898550725	0.595959595959596	0.549056603773585	0.695652173913044	0.353535353535354	0.364150943396226	0.594202898550725	0.424242424242424	0.552830188679245	0.536231884057971	0.313131313131313
CHEMBL2363375	0.569230769230769	0.527472527472527	0.738461538461539	0.669230769230769	0.527472527472527	0.8	0.607692307692308	0.483516483516484	0.692307692307692	0.584615384615385	0.510989010989011	0.8	0.538461538461538	0.620879120879121	0.723076923076923
CHEMBL1738423	0.504166666666667	0.714795008912656	0.75	0.6125	0.606060606060606	0.615384615384615	0.6125	0.554367201426025	0.375	0.804166666666667	0.588235294117647	0.586538461538462	0.5125	0.61319073083779	0.326923076923077
CHEMBL3214828	0.645484949832776	0.754385964912281	0.941818181818182	0.725752508361204	0.81203007518797	0.949090909090909	0.749163879598662	0.854636591478697	0.876363636363636	0.836120401337793	0.621553884711779	0.863636363636364	0.846153846153846	0.80952380952381	0.887272727272727
CHEMBL2114883	0.728632478632479	0.509868421052632	0.624434389140271	0.790598290598291	0.542763157894737	0.64027149321267	0.534188034188034	0.470394736842105	0.515837104072398	0.700854700854701	0.453947368421053	0.595022624434389	0.636752136752137	0.490131578947368	0.588235294117647
CHEMBL1614408	0.770833333333333	0.696428571428571	0.558823529411765	0.569444444444444	0.571428571428571	0.638655462184874	0.572916666666667	0.495238095238095	0.483193277310924	0.534722222222222	0.573809523809524	0.483193277310924	0.611111111111111	0.538095238095238	0.5
CHEMBL872182	0.986111111111111	0.979166666666667	0.963800904977376	0.972222222222222	0.994791666666667	0.943438914027149	0.986111111111111	0.96875	0.925339366515837	0.972222222222222	0.958333333333333	0.782805429864253	0.972222222222222	0.96875	0.925339366515837
CHEMBL2363299	0.666666666666667	0.689075630252101	0.460606060606061	0.898989898989899	0.659663865546218	0.739393939393939	0.595959595959596	0.638655462184874	0.690909090909091	0.626262626262626	0.596638655462185	0.696969696969697	0.631313131313131	0.588235294117647	0.6
CHEMBL1820680	0.866666666666667	0.603174603174603	0.8	0.733333333333333	0.531746031746032	1	0.666666666666667	0.674603174603175	0.8	0.8	0.58531746031746	0.6	0.8	0.55952380952381	0.8
CHEMBL663474	0.782089552238806	1	1	0.865671641791045	1	0.666666666666667	0.847761194029851	1	1	0.795522388059702	1	0.666666666666667	0.828358208955224	1	1
CHEMBL2363268	0.631372549019608	0.678929765886288	0.674107142857143	0.698039215686274	0.732441471571906	0.674107142857143	0.690196078431373	0.789297658862876	0.602678571428571	0.701960784313725	0.719063545150502	0.696428571428572	0.662745098039216	0.698996655518395	0.65625
CHEMBL2363393	0.583333333333333	0.576666666666667	0.588235294117647	0.729166666666667	0.643333333333333	0.676470588235294	0.770833333333333	0.646666666666667	0.647058823529412	0.638888888888889	0.5	0.612745098039216	0.722222222222222	0.633333333333333	0.637254901960784
CHEMBL1737862	0.754385964912281	0.984042553191489	0.884444444444444	0.91812865497076	0.973404255319149	0.871111111111111	0.807017543859649	0.984042553191489	0.866666666666667	0.883040935672515	0.978723404255319	0.822222222222222	0.865497076023392	0.930851063829787	0.928888888888889
CHEMBL2363642	0.56969696969697	0.519230769230769	0.644444444444444	0.715151515151515	0.653846153846154	0.773333333333333	0.678787878787879	0.669230769230769	0.644444444444444	0.539393939393939	0.584615384615385	0.755555555555556	0.696969696969697	0.665384615384615	0.711111111111111
CHEMBL3215144	0.270967741935484	0.524074074074074	0.664516129032258	0.558064516129032	0.768518518518518	0.761290322580645	0.532258064516129	0.838888888888889	0.870967741935484	0.480645161290323	0.587037037037037	0.780645161290323	0.532258064516129	0.768518518518518	0.716129032258064
CHEMBL2363467	0.607954545454545	0.855555555555556	0.647959183673469	0.693181818181818	0.983333333333333	0.816326530612245	0.772727272727273	0.938888888888889	0.826530612244898	0.585227272727273	0.872222222222222	0.510204081632653	0.744318181818182	0.977777777777778	0.811224489795918
CHEMBL2363174	0.587719298245614	0.550173010380623	0.579185520361991	0.653508771929825	0.619377162629758	0.764705882352941	0.701754385964912	0.653979238754325	0.719457013574661	0.530701754385965	0.546712802768166	0.556561085972851	0.745614035087719	0.660899653979239	0.665158371040724
CHEMBL1614417	0.751028806584362	0.467836257309941	0.397435897435897	0.522633744855967	0.543859649122807	0.435897435897436	0.744855967078189	0.567251461988304	0.670940170940171	0.683127572016461	0.535087719298246	0.487179487179487	0.728395061728395	0.43859649122807	0.688034188034188
CHEMBL1614539	0.644736842105263	0.736842105263158	0.675	0.491228070175439	0.618421052631579	0.65	0.43859649122807	0.493421052631579	0.75	0.552631578947368	0.618421052631579	0.55	0.605263157894737	0.585526315789474	0.8625
CHEMBL1738684	0.712962962962963	0.852941176470588	0.639784946236559	0.660493827160494	0.764705882352941	0.774193548387097	0.851851851851852	0.632352941176471	0.811827956989247	0.833333333333333	0.529411764705882	0.779569892473118	0.839506172839506	0.485294117647059	0.82258064516129
CHEMBL3214981	0.673469387755102	0.9296875	0.71078431372549	0.612244897959184	0.71875	0.862745098039216	0.706122448979592	0.65625	0.823529411764706	0.640816326530612	0.625	0.725490196078431	0.746938775510204	0.84375	0.666666666666667
CHEMBL2363321	0.490683229813665	0.607142857142857	0.681159420289855	0.608695652173913	0.757142857142857	0.743961352657005	0.540372670807453	0.7	0.714975845410628	0.639751552795031	0.392857142857143	0.632850241545894	0.540372670807453	0.578571428571429	0.714975845410628
CHEMBL3111197	0.358870967741935	0.413333333333333	1	0.580645161290323	0.553333333333333	0	0.451612903225806	0.396666666666667	0.2	0.524193548387097	0.49	0	0.330645161290323	0.506666666666667	0.4
CHEMBL2114718	0.45	0.414473684210526	0.388461538461538	0.233333333333333	0.460526315789474	0.523076923076923	0.422222222222222	0.536184210526316	0.653846153846154	0.377777777777778	0.5625	0.484615384615385	0.455555555555556	0.427631578947368	0.646153846153846
CHEMBL1963857	0.818713450292398	0.915024630541872	0.590909090909091	0.976608187134503	0.958128078817734	0.787878787878788	0.906432748538012	0.913793103448276	0.752525252525253	0.947368421052632	0.758620689655172	0.823232323232323	0.921052631578947	0.864532019704433	0.742424242424242
CHEMBL2363453	0.6625	0.636363636363636	0.6125	0.675	0.754545454545455	0.8	0.73125	0.65	0.66875	0.6125	0.572727272727273	0.75625	0.73125	0.663636363636364	0.73125
CHEMBL2363176	0.515873015873016	0.555921052631579	0.625668449197861	0.619047619047619	0.483552631578947	0.72192513368984	0.658730158730159	0.628289473684211	0.737967914438503	0.515873015873016	0.519736842105263	0.647058823529412	0.634920634920635	0.569078947368421	0.716577540106952
CHEMBL1963849	0.69047619047619	0.719387755102041	0.672839506172839	0.452380952380952	0.752551020408163	0.583333333333333	0.595238095238095	0.75	0.601851851851852	0.857142857142857	0.75	0.552469135802469	0.547619047619048	0.76530612244898	0.580246913580247
CHEMBL1614210	0.515789473684211	0.44375	0.541062801932367	0.607017543859649	0.585	0.584541062801932	0.505263157894737	0.41375	0.497584541062802	0.53859649122807	0.5425	0.6256038647343	0.564912280701754	0.43125	0.449275362318841
CHEMBL2354260	0.528428093645485	0.444444444444444	0.603896103896104	0.505016722408027	0.416666666666667	0.516233766233766	0.635451505016722	0.503968253968254	0.685064935064935	0.59866220735786	0.448412698412698	0.574675324675325	0.59866220735786	0.361111111111111	0.756493506493507
CHEMBL2363449	0.6	0.645161290322581	0.519230769230769	0.446666666666667	0.903225806451613	0.82051282051282	0.64	0.774193548387097	0.705128205128205	0.48	0.72258064516129	0.794871794871795	0.646666666666667	0.845161290322581	0.807692307692308
CHEMBL1614482	0.860248447204969	0.54	0.711309523809524	0.908385093167702	0.792	0.851190476190476	0.944099378881988	0.756	0.696428571428571	0.874223602484472	0.748	0.803571428571428	0.956521739130435	0.784	0.672619047619048
CHEMBL1614220	0.663201663201663	0.700231481481482	0.66304347826087	0.681912681912682	0.615740740740741	0.773913043478261	0.613305613305613	0.738425925925926	0.756521739130435	0.758835758835759	0.731481481481481	0.873913043478261	0.717255717255717	0.655092592592593	0.795652173913044
CHEMBL2114914	0.565217391304348	0.611111111111111	0.590909090909091	0.75	0.826388888888889	0.787878787878788	0.559782608695652	0.765625	0.772727272727273	0.641304347826087	0.550347222222222	0.48989898989899	0.576086956521739	0.684027777777778	0.722222222222222
CHEMBL2363438	0.56640625	0.524886877828054	0.742857142857143	0.57421875	0.515837104072398	0.771428571428571	0.703125	0.687782805429864	0.680952380952381	0.58984375	0.520361990950226	0.771428571428571	0.6484375	0.633484162895928	0.695238095238095
CHEMBL1613956	0.361111111111111	0.517826825127335	0.469155844155844	0.515873015873016	0.735144312393888	0.655844155844156	0.404761904761905	0.792869269949066	0.577922077922078	0.551587301587302	0.65365025466893	0.642857142857143	0.325396825396825	0.743633276740238	0.581168831168831
CHEMBL1613806	0.87	0.57843137254902	0.598214285714286	0.916923076923077	0.787581699346405	0.803571428571428	0.923076923076923	0.709150326797386	0.791666666666667	0.924615384615385	0.741830065359477	0.797619047619048	0.9	0.712418300653595	0.714285714285714
CHEMBL1614450	0.713541666666667	0.405092592592593	0.351851851851852	0.59375	0.666666666666667	0.481481481481481	0.5625	0.476851851851852	0.518518518518518	0.635416666666667	0.43287037037037	0.277777777777778	0.572916666666667	0.287037037037037	0.537037037037037
CHEMBL1167052	0.620779220779221	1	0.833333333333333	0.866883116883117	1	1	0.768181818181818	1	1	0.905194805194805	1	1	0.747402597402597	1	1
CHEMBL1002712	0.965277777777778	0.898550724637681	1	0.972222222222222	0.869565217391304	0.997435897435897	0.9375	0.847826086956522	1	0.951388888888889	0.898550724637681	0.994871794871795	0.993055555555556	0.847826086956522	1
CHEMBL3111194	0.247058823529412	0.445175438596491	1	0.417647058823529	0.547149122807018	1	0.294117647058824	0.362938596491228	1	0.323529411764706	0.604166666666667	1	0.323529411764706	0.580043859649123	1
CHEMBL1613859	0.736607142857143	0.659420289855073	0.58695652173913	0.830357142857143	0.789855072463768	0.91304347826087	0.8125	0.706521739130435	0.521739130434783	0.785714285714286	0.570652173913043	0.597826086956522	0.678571428571429	0.648550724637681	0.576086956521739
CHEMBL2363146	0.507246376811594	0.541666666666667	0.639285714285714	0.63768115942029	0.587962962962963	0.692857142857143	0.743961352657005	0.587962962962963	0.546428571428571	0.695652173913044	0.384259259259259	0.603571428571429	0.748792270531401	0.643518518518519	0.564285714285714
CHEMBL2363395	0.557823129251701	0.644444444444444	0.68421052631579	0.551020408163265	0.586666666666667	0.76555023923445	0.741496598639456	0.706666666666667	0.76555023923445	0.408163265306122	0.568888888888889	0.684210526315789	0.687074829931973	0.608888888888889	0.717703349282297
CHEMBL938648	0.953703703703704	0.682692307692308	0.777777777777778	0.777777777777778	0.717948717948718	0.703703703703704	0.700617283950617	0.788461538461538	0.703703703703704	0.780864197530864	0.743589743589744	0.777777777777778	0.641975308641975	0.583333333333333	0.851851851851852
CHEMBL1613980	0.577235772357724	0.473484848484849	0.533333333333333	0.569105691056911	0.674242424242424	0.283333333333333	0.609756097560976	0.444444444444444	0.866666666666667	0.642276422764228	0.545454545454545	0.466666666666667	0.646341463414634	0.46969696969697	0.466666666666667
CHEMBL2363581	0.59469696969697	0.824561403508772	0.708333333333333	0.613636363636364	0.864035087719298	0.842592592592593	0.625	0.798245614035088	0.773148148148148	0.571969696969697	0.75	0.689814814814815	0.632575757575758	0.81140350877193	0.777777777777778
CHEMBL3215132	0.702702702702703	0.58125	0.736559139784946	0.617117117117117	0.734375	0.682795698924731	0.481981981981982	0.759375	0.672043010752688	0.572072072072072	0.859375	0.712365591397849	0.490990990990991	0.746875	0.612903225806452
CHEMBL1614267	0.623809523809524	0.606481481481482	0.667355371900826	0.610714285714286	0.712962962962963	0.636363636363636	0.582142857142857	0.699074074074074	0.632231404958678	0.515476190476191	0.75462962962963	0.690082644628099	0.579761904761905	0.638888888888889	0.636363636363636
CHEMBL2363277	0.477678571428571	0.72875816993464	0.695238095238095	0.4375	0.777777777777778	0.728571428571429	0.65625	0.699346405228758	0.761904761904762	0.584821428571429	0.562091503267974	0.628571428571429	0.6875	0.660130718954248	0.685714285714286
CHEMBL3111192	0.564285714285714	0.576271186440678	1	0.65	0.598870056497175	0.8	0.578571428571429	0.412429378531073	0.4	0.728571428571429	0.525423728813559	0.2	0.457142857142857	0.240112994350282	0.2
CHEMBL3111198	0.375	0.498774509803922	0.666666666666667	0.580645161290323	0.611519607843137	0.555555555555556	0.713709677419355	0.419117647058823	0.666666666666667	0.850806451612903	0.644607843137255	0.777777777777778	0.588709677419355	0.433823529411765	0.888888888888889
CHEMBL2363153	0.598639455782313	0.613333333333333	0.760233918128655	0.82312925170068	0.483333333333333	0.83625730994152	0.714285714285714	0.563333333333333	0.719298245614035	0.687074829931973	0.506666666666667	0.783625730994152	0.707482993197279	0.563333333333333	0.789473684210526
CHEMBL2363197	0.675925925925926	0.601190476190476	0.596590909090909	0.768518518518519	0.56547619047619	0.761363636363636	0.657407407407407	0.553571428571429	0.721590909090909	0.476851851851852	0.398809523809524	0.670454545454545	0.689814814814815	0.607142857142857	0.607954545454545
CHEMBL2363371	0.493421052631579	0.495833333333333	0.545	0.671052631578947	0.620833333333333	0.775	0.763157894736842	0.6	0.58	0.434210526315789	0.425	0.855	0.763157894736842	0.445833333333333	0.655
CHEMBL2363734	0.550505050505051	0.670940170940171	0.547058823529412	0.777777777777778	0.662393162393162	0.764705882352941	0.742424242424242	0.670940170940171	0.588235294117647	0.681818181818182	0.739316239316239	0.729411764705882	0.707070707070707	0.658119658119658	0.723529411764706
CHEMBL1614478	0.942857142857143	0.732142857142857	0.555555555555556	0.895238095238095	0.776785714285714	0.822222222222222	0.933333333333333	0.785714285714286	0.774074074074074	0.876190476190476	0.825892857142857	0.685185185185185	0.866666666666667	0.683035714285714	0.807407407407407
CHEMBL2363336	0.51984126984127	0.753246753246753	0.534090909090909	0.75	0.688311688311688	0.630681818181818	0.69047619047619	0.805194805194805	0.443181818181818	0.761904761904762	0.722943722943723	0.738636363636364	0.690476190476191	0.783549783549784	0.5
CHEMBL3111195	0.617241379310345	0.689075630252101	0.5	0.548275862068966	0.782913165266106	0.5	0.631034482758621	0.528011204481793	0.5	0.737931034482759	0.740896358543417	0.5	0.531034482758621	0.676470588235294	0.5
CHEMBL2363278	0.491666666666667	0.661184210526316	0.65625	0.629166666666667	0.657894736842105	0.6484375	0.716666666666667	0.726973684210526	0.65234375	0.491666666666667	0.565789473684211	0.62890625	0.725	0.667763157894737	0.65234375
CHEMBL2363351	0.523529411764706	0.629166666666667	0.446078431372549	0.717647058823529	0.6	0.642156862745098	0.782352941176471	0.529166666666667	0.622549019607843	0.617647058823529	0.529166666666667	0.700980392156863	0.7	0.554166666666667	0.637254901960784
CHEMBL2363391	0.611336032388664	0.666666666666667	0.609243697478992	0.753036437246964	0.63030303030303	0.672268907563025	0.716599190283401	0.696969696969697	0.689075630252101	0.59919028340081	0.566666666666667	0.647058823529412	0.736842105263158	0.696969696969697	0.676470588235294
CHEMBL2363326	0.679166666666667	0.525	0.566176470588235	0.6875	0.559090909090909	0.731617647058824	0.654166666666667	0.659090909090909	0.588235294117647	0.291666666666667	0.481818181818182	0.654411764705882	0.591666666666667	0.677272727272727	0.647058823529412
CHEMBL2363328	0.362962962962963	0.538888888888889	0.638888888888889	0.474074074074074	0.608333333333333	0.631944444444445	0.696296296296296	0.677777777777778	0.763888888888889	0.42962962962963	0.730555555555556	0.520833333333333	0.62962962962963	0.677777777777778	0.694444444444444
CHEMBL2363330	0.464646464646465	0.55050505050505	0.535714285714286	0.641414141414141	0.515151515151515	0.6875	0.676767676767677	0.641414141414141	0.709821428571429	0.419191919191919	0.398989898989899	0.642857142857143	0.621212121212121	0.570707070707071	0.696428571428571
CHEMBL2363364	0.65948275862069	0.687272727272727	0.578512396694215	0.642241379310345	0.730909090909091	0.747933884297521	0.745689655172414	0.636363636363636	0.574380165289256	0.71551724137931	0.694545454545455	0.62396694214876	0.724137931034483	0.694545454545455	0.628099173553719
CHEMBL2363333	0.503030303030303	0.565826330532213	0.533333333333333	0.618181818181818	0.65266106442577	0.682352941176471	0.6	0.65266106442577	0.768627450980392	0.454545454545455	0.619047619047619	0.486274509803922	0.593939393939394	0.669467787114846	0.784313725490196
CHEMBL2363148	0.595959595959596	0.648550724637681	0.504132231404959	0.611111111111111	0.706521739130435	0.669421487603306	0.762626262626263	0.706521739130435	0.549586776859504	0.494949494949495	0.478260869565217	0.685950413223141	0.702020202020202	0.543478260869565	0.648760330578512
CHEMBL2363264	0.583333333333333	0.575396825396825	0.523809523809524	0.571428571428571	0.603174603174603	0.75	0.603174603174603	0.583333333333333	0.607142857142857	0.579365079365079	0.511904761904762	0.73015873015873	0.642857142857143	0.642857142857143	0.654761904761905
CHEMBL2363283	0.647727272727273	0.631372549019608	0.751633986928105	0.784090909090909	0.631372549019608	0.705882352941177	0.568181818181818	0.541176470588235	0.535947712418301	0.619318181818182	0.596078431372549	0.607843137254902	0.607954545454545	0.611764705882353	0.640522875816993
CHEMBL2363660	0.711111111111111	0.56280193236715	0.604761904761905	0.740740740740741	0.596618357487923	0.752380952380952	0.633333333333333	0.632850241545894	0.6	0.62962962962963	0.509661835748792	0.738095238095238	0.662962962962963	0.560386473429952	0.714285714285714
CHEMBL2363307	0.556818181818182	0.493421052631579	0.487179487179487	0.511363636363636	0.513157894736842	0.666666666666667	0.647727272727273	0.667763157894737	0.493589743589744	0.602272727272727	0.539473684210526	0.641025641025641	0.647727272727273	0.569078947368421	0.544871794871795
CHEMBL2363247	0.51010101010101	0.637037037037037	0.628205128205128	0.5	0.72962962962963	0.764957264957265	0.707070707070707	0.766666666666667	0.641025641025641	0.595959595959596	0.588888888888889	0.58974358974359	0.702020202020202	0.740740740740741	0.688034188034188
CHEMBL2363465	0.652173913043478	0.720238095238095	0.625	0.657004830917874	0.592261904761905	0.82	0.782608695652174	0.6875	0.75	0.681159420289855	0.604166666666667	0.7	0.772946859903382	0.669642857142857	0.745
CHEMBL2363225	0.480952380952381	0.688644688644689	0.57085020242915	0.538095238095238	0.641025641025641	0.724696356275304	0.595238095238095	0.728937728937729	0.744939271255061	0.461904761904762	0.58974358974359	0.639676113360324	0.566666666666667	0.655677655677656	0.740890688259109
CHEMBL2363468	0.616	0.583333333333333	0.665071770334928	0.728	0.621794871794872	0.607655502392345	0.72	0.592948717948718	0.578947368421053	0.648	0.586538461538462	0.607655502392344	0.708	0.653846153846154	0.665071770334928
CHEMBL2114826	0.577083333333333	0.651282051282051	0.632373113854595	0.759375	0.784615384615385	0.761316872427984	0.653125	0.774358974358974	0.725651577503429	0.765625	0.641025641025641	0.655692729766804	0.713541666666667	0.753846153846154	0.791495198902606
CHEMBL3215266	0.60377358490566	0.572463768115942	0.808080808080808	0.692452830188679	0.478260869565217	0.676767676767677	0.552830188679245	0.652173913043478	0.424242424242424	0.371698113207547	0.594202898550725	0.434343434343434	0.518867924528302	0.565217391304348	0.313131313131313
CHEMBL2363731	0.555944055944056	0.745454545454545	0.555023923444976	0.65034965034965	0.792727272727273	0.698564593301435	0.601398601398601	0.669090909090909	0.626794258373206	0.416083916083916	0.694545454545455	0.665071770334928	0.636363636363636	0.752727272727273	0.636363636363636
CHEMBL1614479	0.989795918367347	0.853174603174603	0.851851851851852	0.857142857142857	0.873015873015873	0.592592592592593	0.744897959183674	0.714285714285714	0.888888888888889	0.73469387755102	0.888888888888889	0.666666666666667	0.602040816326531	0.619047619047619	0.888888888888889
CHEMBL3214782	0.710407239819005	0.556451612903226	0.509259259259259	0.632352941176471	0.588709677419355	0.574074074074074	0.650452488687783	0.459677419354839	0.527777777777778	0.643665158371041	0.491935483870968	0.226851851851852	0.632352941176471	0.862903225806452	0.537037037037037
CHEMBL1614273	0.4	0.497931034482759	0.545751633986928	0.522222222222222	0.533793103448276	0.522875816993464	0.586111111111111	0.598620689655172	0.450980392156863	0.752777777777778	0.52551724137931	0.591503267973856	0.647222222222222	0.453793103448276	0.434640522875817
CHEMBL1794400	0.831018518518518	0.748	0.577380952380952	0.810185185185185	0.686	0.660714285714286	0.773148148148148	0.682	0.720238095238095	0.888888888888889	0.719	0.660714285714286	0.851851851851852	0.742	0.708333333333333
CHEMBL2363728	0.495798319327731	0.625	0.641666666666667	0.705882352941177	0.620614035087719	0.704166666666667	0.710084033613445	0.728070175438597	0.7625	0.38655462184874	0.56359649122807	0.6125	0.613445378151261	0.684210526315789	0.770833333333333
CHEMBL2363568	0.5375	0.59919028340081	0.630681818181818	0.625	0.659919028340081	0.784090909090909	0.675	0.740890688259109	0.6875	0.575	0.595141700404858	0.653409090909091	0.625	0.716599190283401	0.727272727272727
CHEMBL2363353	0.588235294117647	0.686111111111111	0.688259109311741	0.565610859728507	0.558333333333333	0.724696356275304	0.742081447963801	0.683333333333333	0.740890688259109	0.552036199095023	0.5	0.668016194331984	0.723981900452489	0.641666666666667	0.712550607287449
CHEMBL2363230	0.613636363636364	0.561538461538462	0.55026455026455	0.653409090909091	0.480769230769231	0.724867724867725	0.659090909090909	0.426923076923077	0.682539682539683	0.602272727272727	0.592307692307692	0.566137566137566	0.590909090909091	0.665384615384615	0.587301587301587
CHEMBL1670561	0.941176470588235	0.757692307692308	0.852216748768473	0.294117647058824	0.596153846153846	0.679802955665025	1	0.730769230769231	0.830049261083744	0.764705882352941	0.521153846153846	0.653940886699507	1	0.723076923076923	0.800492610837438
CHEMBL1614518	0.51358024691358	0.601449275362319	0.468518518518519	0.54320987654321	0.707729468599034	0.618518518518518	0.397530864197531	0.524154589371981	0.566666666666667	0.541975308641975	0.685990338164251	0.503703703703704	0.459259259259259	0.572463768115942	0.611111111111111
CHEMBL2363739	0.59919028340081	0.573099415204678	0.515151515151515	0.720647773279352	0.52046783625731	0.641414141414141	0.623481781376518	0.649122807017544	0.484848484848485	0.672064777327935	0.573099415204678	0.54040404040404	0.587044534412955	0.543859649122807	0.575757575757576
CHEMBL2363558	0.633333333333333	0.622159090909091	0.619047619047619	0.725	0.497159090909091	0.638095238095238	0.566666666666667	0.71875	0.714285714285714	0.458333333333333	0.5	0.571428571428571	0.533333333333333	0.642045454545455	0.704761904761905
CHEMBL2363322	0.65	0.549382716049383	0.59504132231405	0.55	0.462962962962963	0.735537190082645	0.731818181818182	0.561728395061728	0.739669421487603	0.572727272727273	0.472222222222222	0.640495867768595	0.722727272727273	0.530864197530864	0.702479338842975
CHEMBL2363753	0.626984126984127	0.584795321637427	0.5	0.75	0.573099415204678	0.714285714285714	0.623015873015873	0.616959064327485	0.71875	0.702380952380952	0.646198830409357	0.549107142857143	0.642857142857143	0.526315789473684	0.709821428571428
CHEMBL2363348	0.5	0.625	0.582995951417004	0.713636363636364	0.677083333333333	0.785425101214575	0.65	0.671875	0.692307692307692	0.631818181818182	0.661458333333333	0.740890688259109	0.65	0.713541666666667	0.728744939271255
CHEMBL1614321	0.468599033816425	0.409688013136289	0.45	0.623188405797101	0.591133004926108	0.436666666666667	0.57487922705314	0.543513957307061	0.556666666666667	0.589371980676329	0.48111658456486	0.35	0.521739130434783	0.568144499178982	0.536666666666667
CHEMBL2363337	0.617777777777778	0.572222222222222	0.665	0.604444444444444	0.580555555555556	0.855	0.755555555555556	0.644444444444444	0.64	0.586666666666667	0.580555555555555	0.58	0.72	0.6	0.735
CHEMBL2363228	0.664835164835165	0.758974358974359	0.769230769230769	0.725274725274725	0.528205128205128	0.741758241758242	0.758241758241758	0.656410256410257	0.840659340659341	0.576923076923077	0.523076923076923	0.675824175824176	0.725274725274725	0.641025641025641	0.791208791208791
CHEMBL2363504	0.534412955465587	0.6025	0.803921568627451	0.615384615384615	0.475	0.666666666666667	0.672064777327935	0.54	0.686274509803922	0.477732793522267	0.4675	0.588235294117647	0.672064777327935	0.535	0.67156862745098
CHEMBL2363664	0.554112554112554	0.746153846153846	0.654166666666667	0.74025974025974	0.764102564102564	0.8625	0.67965367965368	0.782051282051282	0.783333333333333	0.506493506493507	0.702564102564103	0.8	0.670995670995671	0.792307692307692	0.85
CHEMBL2363269	0.509090909090909	0.411764705882353	0.46875	0.607272727272727	0.537433155080214	0.75	0.694545454545455	0.596256684491979	0.625	0.603636363636364	0.508021390374331	0.633928571428571	0.650909090909091	0.620320855614973	0.683035714285714
CHEMBL1613893	0.639030612244898	0.813664596273292	0.671957671957672	0.878826530612245	0.838509316770186	0.486772486772487	0.928571428571429	0.894409937888199	0.756613756613757	0.721938775510204	0.850931677018633	0.775132275132275	0.829081632653061	0.875776397515528	0.624338624338624
CHEMBL1614345	0.434615384615385	0.534722222222222	0.534375	0.373076923076923	0.612847222222222	0.5625	0.569230769230769	0.770833333333333	0.625	0.407692307692308	0.605902777777778	0.690625	0.538461538461538	0.743055555555556	0.709375
CHEMBL2363442	0.649122807017544	0.700404858299595	0.55050505050505	0.684210526315789	0.712550607287449	0.626262626262626	0.760233918128655	0.700404858299595	0.707070707070707	0.654970760233918	0.562753036437247	0.646464646464647	0.760233918128655	0.708502024291498	0.681818181818182
CHEMBL2363317	0.477732793522267	0.642857142857143	0.732142857142857	0.587044534412956	0.68452380952381	0.763392857142857	0.785425101214575	0.74702380952381	0.736607142857143	0.797570850202429	0.62797619047619	0.674107142857143	0.736842105263158	0.705357142857143	0.727678571428571
CHEMBL2363432	0.4875	0.528428093645485	0.6	0.633333333333333	0.588628762541806	0.690196078431373	0.654166666666667	0.698996655518395	0.682352941176471	0.4	0.468227424749164	0.603921568627451	0.629166666666667	0.668896321070234	0.635294117647059
CHEMBL1614376	0.296875	0.295454545454545	0.0645161290322581	0.53125	0.581818181818182	0.516129032258065	0.53125	0.427272727272727	0.32258064516129	0.46875	0.418181818181818	0.161290322580645	0.484375	0.390909090909091	0.67741935483871
CHEMBL2363403	0.443609022556391	0.502645502645503	0.538461538461538	0.488721804511278	0.574074074074074	0.712820512820513	0.56015037593985	0.619047619047619	0.641025641025641	0.503759398496241	0.5	0.717948717948718	0.586466165413534	0.656084656084656	0.661538461538462
CHEMBL1614355	0.0606060606060606	0.842105263157895	0.777777777777778	0.818181818181818	0.0526315789473684	0.111111111111111	0.96969696969697	0.789473684210526	0.277777777777778	1	0	0.5	0.939393939393939	0.0526315789473684	0.111111111111111
CHEMBL2363593	0.545454545454545	0.560185185185185	0.545454545454545	0.590909090909091	0.467592592592593	0.695187165775401	0.656565656565657	0.550925925925926	0.732620320855615	0.505050505050505	0.518518518518519	0.614973262032086	0.626262626262626	0.560185185185185	0.711229946524064
CHEMBL2363414	0.593301435406699	0.632352941176471	0.625	0.861244019138756	0.591176470588235	0.572916666666667	0.77511961722488	0.641176470588235	0.625	0.650717703349282	0.623529411764706	0.520833333333333	0.799043062200957	0.655882352941177	0.682291666666667
CHEMBL1614226	0.826612903225806	0.766233766233766	0.697115384615385	0.67741935483871	0.764069264069264	0.802884615384615	0.693548387096774	0.751082251082251	0.740384615384615	0.629032258064516	0.783549783549784	0.860576923076923	0.588709677419355	0.82034632034632	0.692307692307692
CHEMBL2363444	0.555555555555556	0.702380952380952	0.702380952380952	0.703703703703704	0.761904761904762	0.761904761904762	0.64021164021164	0.619047619047619	0.785714285714286	0.529100529100529	0.642857142857143	0.75	0.624338624338624	0.781746031746032	0.779761904761905
CHEMBL1738246	0.988636363636364	0.556363636363636	0.756704980842912	1	0.56	0.812260536398467	1	0.538181818181818	0.747126436781609	0.977272727272727	0.585454545454545	0.818007662835249	1	0.501818181818182	0.747126436781609
CHEMBL2363697	0.709090909090909	0.682051282051282	0.678362573099415	0.818181818181818	0.769230769230769	0.748538011695906	0.736363636363636	0.656410256410256	0.766081871345029	0.518181818181818	0.646153846153846	0.719298245614035	0.740909090909091	0.78974358974359	0.801169590643275
CHEMBL2363725	0.5	0.5875	0.511111111111111	0.565359477124183	0.6375	0.714814814814815	0.660130718954248	0.70625	0.625925925925926	0.594771241830065	0.55625	0.496296296296296	0.643790849673203	0.653125	0.644444444444444
CHEMBL2363572	0.63961038961039	0.747619047619048	0.688034188034188	0.74025974025974	0.697619047619048	0.760683760683761	0.756493506493507	0.764285714285714	0.666666666666667	0.681818181818182	0.630952380952381	0.713675213675214	0.75	0.721428571428572	0.662393162393162
CHEMBL2363189	0.697368421052632	0.609523809523809	0.458333333333333	0.700657894736842	0.565079365079365	0.615740740740741	0.582236842105263	0.565079365079365	0.652777777777778	0.559210526315789	0.412698412698413	0.564814814814815	0.595394736842105	0.53015873015873	0.606481481481482
CHEMBL2363799	0.558704453441295	0.678030303030303	0.747619047619048	0.773279352226721	0.647727272727273	0.857142857142857	0.692307692307692	0.681818181818182	0.623809523809524	0.720647773279352	0.685606060606061	0.857142857142857	0.696356275303644	0.742424242424242	0.70952380952381
CHEMBL2363628	0.482758620689655	0.329365079365079	0.564102564102564	0.547413793103448	0.492063492063492	0.724358974358974	0.620689655172414	0.503968253968254	0.519230769230769	0.616379310344828	0.317460317460317	0.608974358974359	0.581896551724138	0.51984126984127	0.551282051282051
CHEMBL2363489	0.541176470588235	0.557692307692308	0.772222222222222	0.629411764705882	0.612179487179487	0.866666666666667	0.682352941176471	0.576923076923077	0.677777777777778	0.323529411764706	0.580128205128205	0.655555555555556	0.576470588235294	0.701923076923077	0.727777777777778
CHEMBL2363426	0.5	0.525	0.532967032967033	0.580952380952381	0.683333333333333	0.67032967032967	0.704761904761905	0.645833333333333	0.686813186813187	0.395238095238095	0.575	0.604395604395604	0.671428571428571	0.720833333333333	0.692307692307692
CHEMBL1738575	0.561764705882353	0.661904761904762	0.593307593307593	0.855882352941176	0.783333333333333	0.741312741312741	0.555882352941176	0.84047619047619	0.714285714285714	0.810294117647059	0.742857142857143	0.764478764478764	0.755882352941177	0.721428571428572	0.692406692406692
CHEMBL2363836	0.559090909090909	0.529239766081871	0.672064777327935	0.577272727272727	0.637426900584795	0.736842105263158	0.613636363636364	0.567251461988304	0.595141700404858	0.618181818181818	0.56140350877193	0.716599190283401	0.577272727272727	0.555555555555556	0.623481781376518
CHEMBL2363789	0.647058823529412	0.739130434782609	0.697115384615385	0.743034055727554	0.524844720496894	0.730769230769231	0.687306501547988	0.62111801242236	0.725961538461538	0.560371517027864	0.652173913043478	0.711538461538462	0.637770897832817	0.785714285714286	0.8125
CHEMBL2363553	0.687306501547988	0.555555555555556	0.582417582417582	0.653250773993808	0.673611111111111	0.747252747252747	0.69969040247678	0.708333333333333	0.697802197802198	0.489164086687306	0.583333333333333	0.604395604395604	0.674922600619195	0.659722222222222	0.692307692307692
CHEMBL2363332	0.583333333333333	0.613003095975232	0.546875	0.526785714285714	0.603715170278638	0.64453125	0.642857142857143	0.65015479876161	0.6328125	0.574404761904762	0.575851393188854	0.58203125	0.589285714285714	0.578947368421053	0.6328125
CHEMBL1614308	0.5046875	0.42512077294686	0.43343653250774	0.659375	0.529790660225443	0.479876160990712	0.465625	0.537842190016103	0.498452012383901	0.621875	0.470209339774557	0.504643962848297	0.53125	0.528180354267311	0.529411764705882
CHEMBL2363809	0.480952380952381	0.602564102564103	0.619047619047619	0.680952380952381	0.58974358974359	0.74025974025974	0.761904761904762	0.620512820512821	0.623376623376623	0.59047619047619	0.520512820512821	0.619047619047619	0.795238095238095	0.638461538461539	0.70995670995671
CHEMBL2363207	0.436213991769547	0.712	0.666666666666667	0.588477366255144	0.832	0.822222222222222	0.786008230452675	0.652	0.688888888888889	0.633744855967078	0.604	0.762962962962963	0.765432098765432	0.68	0.707407407407407
CHEMBL2114827	0	0.341085271317829	0.383720930232558	0	0.13953488372093	0.680232558139535	0.0857142857142857	0.255813953488372	0.465116279069767	0	0.294573643410853	0.546511627906977	0.228571428571429	0.286821705426357	0.395348837209302
CHEMBL1964046	0.474242424242424	0.563775510204082	0.556878306878307	0.660606060606061	0.573979591836735	0.592592592592593	0.621212121212121	0.591836734693878	0.732804232804233	0.593939393939394	0.474489795918367	0.547619047619048	0.651515151515152	0.581632653061225	0.687830687830688
CHEMBL1614462	0.448160535117057	0.334319526627219	0.299019607843137	0.381270903010033	0.458579881656805	0.508169934640523	0.387959866220736	0.402366863905325	0.418300653594771	0.488294314381271	0.514792899408284	0.529411764705882	0.397993311036789	0.399408284023669	0.34640522875817
CHEMBL2363671	0.504385964912281	0.684	0.683333333333333	0.557017543859649	0.592	0.75	0.649122807017544	0.784	0.605555555555556	0.526315789473684	0.556	0.644444444444444	0.631578947368421	0.688	0.605555555555556
CHEMBL2363290	0.465811965811966	0.609090909090909	0.614035087719298	0.52991452991453	0.754545454545454	0.81140350877193	0.709401709401709	0.766666666666667	0.631578947368421	0.602564102564102	0.542424242424242	0.666666666666667	0.756410256410256	0.733333333333333	0.679824561403509
CHEMBL2363459	0.631944444444444	0.602272727272727	0.753086419753086	0.809027777777778	0.619318181818182	0.759259259259259	0.795138888888889	0.545454545454545	0.657407407407407	0.59375	0.508522727272727	0.719135802469136	0.795138888888889	0.684659090909091	0.70679012345679
CHEMBL2363611	0.692857142857143	0.642857142857143	0.827380952380952	0.692857142857143	0.6875	0.880952380952381	0.764285714285714	0.69047619047619	0.726190476190476	0.625	0.648809523809524	0.601190476190476	0.728571428571429	0.720238095238095	0.785714285714286
CHEMBL2363743	0.4921875	0.681547619047619	0.670138888888889	0.58203125	0.711309523809524	0.743055555555556	0.69921875	0.699404761904762	0.663194444444445	0.69921875	0.607142857142857	0.579861111111111	0.69921875	0.744047619047619	0.722222222222222
CHEMBL1613821	0.5	0.611111111111111	0.620614035087719	0.584615384615385	0.688888888888889	0.767543859649123	0.592307692307692	0.794444444444445	0.412280701754386	0.5	0.8	0.690789473684211	0.615384615384615	0.516666666666667	0.350877192982456
CHEMBL2363341	0.55982905982906	0.683385579937304	0.572727272727273	0.670940170940171	0.642633228840125	0.713636363636364	0.670940170940171	0.736677115987461	0.568181818181818	0.517094017094017	0.601880877742947	0.718181818181818	0.666666666666667	0.626959247648903	0.645454545454546
CHEMBL1614465	0.507936507936508	0.454545454545455	0.465909090909091	0.740079365079365	0.698863636363636	0.857954545454545	0.609126984126984	0.551136363636364	0.647727272727273	0.678571428571429	0.457386363636364	0.738636363636364	0.597222222222222	0.721590909090909	0.630681818181818
CHEMBL1614083	0.467391304347826	0.555555555555555	0.6875	0.869565217391304	0.966666666666667	0.651785714285714	0.695652173913043	0.777777777777778	0.580357142857143	0.108695652173913	0.955555555555555	0.741071428571429	0.630434782608696	0.7	0.473214285714286
CHEMBL2363366	0.46875	0.53030303030303	0.610714285714286	0.833333333333333	0.568181818181818	0.589285714285714	0.8125	0.549242424242424	0.685714285714286	0.557291666666667	0.564393939393939	0.65	0.796875	0.53030303030303	0.742857142857143
CHEMBL2363766	0.488095238095238	0.6	0.497835497835498	0.863095238095238	0.597101449275362	0.593073593073593	0.69047619047619	0.631884057971015	0.675324675324675	0.535714285714286	0.617391304347826	0.528138528138528	0.660714285714286	0.634782608695652	0.705627705627706
CHEMBL2363464	0.521739130434783	0.550769230769231	0.416267942583732	0.706521739130435	0.538461538461539	0.574162679425837	0.793478260869565	0.590769230769231	0.636363636363636	0.603260869565217	0.433846153846154	0.617224880382775	0.793478260869565	0.581538461538462	0.641148325358852
CHEMBL1963899	0.630357142857143	0.69208211143695	0.761363636363636	0.739285714285714	0.750733137829912	0.704545454545454	0.696428571428571	0.777126099706745	0.597402597402597	0.639285714285714	0.712609970674487	0.63961038961039	0.792857142857143	0.803519061583578	0.594155844155844
CHEMBL3214801	0.623376623376623	0.632936507936508	0.64367816091954	0.649350649350649	0.625	0.566091954022989	0.724025974025974	0.732142857142857	0.640804597701149	0.62012987012987	0.476190476190476	0.649425287356322	0.75	0.708333333333333	0.640804597701149
CHEMBL1614512	0.718614718614719	0.772727272727273	0.620512820512821	0.813852813852814	0.820574162679426	0.530769230769231	0.787878787878788	0.677033492822966	0.648717948717949	0.714285714285714	0.770334928229665	0.7	0.768398268398268	0.803827751196172	0.712820512820513
CHEMBL648337	0.844444444444445	0.916666666666667	0.928571428571429	0.955555555555556	0.890384615384615	0.941964285714286	0.777777777777778	0.890384615384615	0.90625	0.8	0.754487179487179	0.848214285714286	0.8	0.867307692307692	0.910714285714286
CHEMBL2363213	0.591666666666667	0.674825174825175	0.853333333333333	0.479166666666667	0.692307692307692	0.833333333333333	0.683333333333333	0.681818181818182	0.7	0.333333333333333	0.70979020979021	0.686666666666667	0.620833333333333	0.713286713286713	0.7
CHEMBL2363556	0.534615384615384	0.547794117647059	0.720588235294118	0.684615384615385	0.639705882352941	0.735294117647059	0.842307692307692	0.669117647058823	0.694852941176471	0.530769230769231	0.525735294117647	0.602941176470588	0.823076923076923	0.694852941176471	0.779411764705882
CHEMBL2363142	0.678571428571429	0.63986013986014	0.387254901960784	0.571428571428571	0.646853146853147	0.720588235294118	0.75	0.604895104895105	0.666666666666667	0.45	0.513986013986014	0.5	0.728571428571429	0.587412587412588	0.637254901960784
CHEMBL2363788	0.568627450980392	0.706349206349206	0.734375	0.749019607843137	0.666666666666667	0.73828125	0.643137254901961	0.674603174603175	0.72265625	0.501960784313725	0.654761904761905	0.6796875	0.6	0.76984126984127	0.8046875
CHEMBL2363560	0.62406015037594	0.558823529411765	0.607843137254902	0.774436090225564	0.679411764705882	0.686274509803922	0.770676691729323	0.661764705882353	0.607843137254902	0.582706766917293	0.502941176470588	0.558823529411765	0.714285714285714	0.629411764705882	0.656862745098039
CHEMBL2155446	1	1	1	1	1	1	1	1	1	1	1	1	1	1	1
CHEMBL2363790	0.54296875	0.605	0.706766917293233	0.6953125	0.745	0.834586466165414	0.64453125	0.615	0.74812030075188	0.4609375	0.565	0.721804511278195	0.58203125	0.64	0.853383458646617
CHEMBL2363481	0.64	0.772727272727273	0.705263157894737	0.73	0.755244755244755	0.773684210526316	0.745	0.748251748251748	0.742105263157895	0.7	0.776223776223776	0.721052631578947	0.755	0.811188811188811	0.773684210526316
CHEMBL2114715	0.784090909090909	0.435606060606061	0.625514403292181	0.681818181818182	0.590909090909091	0.674897119341564	0.71969696969697	0.610606060606061	0.598765432098765	0.761363636363636	0.531818181818182	0.798353909465021	0.78030303030303	0.748484848484848	0.65843621399177
CHEMBL2363433	0.528125	0.69047619047619	0.684444444444444	0.79375	0.708333333333333	0.764444444444444	0.6625	0.6875	0.724444444444445	0.63125	0.586309523809524	0.733333333333333	0.65	0.758928571428572	0.768888888888889
CHEMBL2363609	0.612745098039216	0.571895424836601	0.629807692307692	0.637254901960784	0.679738562091503	0.725961538461538	0.784313725490196	0.696078431372549	0.620192307692308	0.720588235294118	0.565359477124183	0.677884615384615	0.754901960784314	0.683006535947712	0.5625
CHEMBL3214965	0.570707070707071	0.569444444444444	0.825119236883943	0.618686868686869	0.773148148148148	0.853736089030207	0.595959595959596	0.583333333333333	0.693163751987281	0.621212121212121	0.680555555555556	0.839427662957075	0.656565656565657	0.712962962962963	0.85214626391097
CHEMBL1169087	0.659498207885305	0.729166666666667	0.861111111111111	0.913978494623656	0.885416666666667	1	0.745519713261649	0.666666666666667	1	0.978494623655914	0.96875	0.869047619047619	0.731182795698925	0.604166666666667	0.924603174603175
CHEMBL3214907	0.446488294314381	0.537280701754386	0.394607843137255	0.704013377926421	0.594298245614035	0.428921568627451	0.498327759197324	0.68640350877193	0.438725490196078	0.754180602006689	0.552631578947368	0.465686274509804	0.5	0.530701754385965	0.424019607843137
CHEMBL687330	0.876488095238095	0.966666666666667	1	0.860119047619048	0.983333333333333	1	0.779761904761905	0.983333333333333	1	0.766369047619048	0.983333333333333	1	0.845238095238095	0.983333333333333	1
CHEMBL1614008	0.667741935483871	0.6	0.510204081632653	0.604301075268817	0.711578947368421	0.707482993197279	0.698924731182796	0.625263157894737	0.622448979591837	0.635483870967742	0.757894736842105	0.636054421768707	0.612903225806452	0.646315789473684	0.636054421768708
CHEMBL2363324	0.472727272727273	0.640316205533597	0.6	0.586363636363636	0.624505928853755	0.682608695652174	0.536363636363636	0.592885375494071	0.604347826086957	0.368181818181818	0.596837944664032	0.595652173913043	0.563636363636364	0.608695652173913	0.691304347826087
CHEMBL2363185	0.617647058823529	0.602240896358543	0.651260504201681	0.680147058823529	0.666666666666667	0.714285714285714	0.643382352941177	0.677871148459384	0.613445378151261	0.588235294117647	0.619047619047619	0.642857142857143	0.661764705882353	0.683473389355742	0.647058823529412
CHEMBL2363220	0.509090909090909	0.588235294117647	0.588235294117647	0.7	0.702941176470588	0.716911764705882	0.696969696969697	0.773529411764706	0.654411764705882	0.533333333333333	0.538235294117647	0.621323529411765	0.672727272727273	0.655882352941176	0.683823529411765
CHEMBL2363555	0.525691699604743	0.639751552795031	0.754940711462451	0.561264822134387	0.645962732919255	0.778656126482213	0.600790513833992	0.649068322981367	0.74703557312253	0.442687747035573	0.708074534161491	0.707509881422925	0.58102766798419	0.661490683229814	0.770750988142292
CHEMBL2363437	0.6125	0.510204081632653	0.476190476190476	0.808333333333333	0.513605442176871	0.678571428571429	0.658333333333333	0.710884353741497	0.625	0.666666666666667	0.622448979591837	0.625	0.608333333333333	0.622448979591837	0.642857142857143
CHEMBL2363243	0.615131578947368	0.640522875816994	0.719457013574661	0.740131578947368	0.718954248366013	0.760180995475113	0.746710526315789	0.748366013071895	0.796380090497738	0.450657894736842	0.660130718954248	0.805429864253394	0.75	0.748366013071895	0.877828054298643
CHEMBL2363612	0.604545454545455	0.622222222222222	0.60427807486631	0.713636363636364	0.655555555555556	0.79144385026738	0.727272727272727	0.866666666666667	0.802139037433155	0.659090909090909	0.6	0.609625668449198	0.668181818181818	0.777777777777778	0.802139037433155
CHEMBL2363140	0.61	0.719047619047619	0.859649122807018	0.643333333333333	0.733333333333333	0.815789473684211	0.686666666666667	0.7	0.833333333333333	0.443333333333333	0.733333333333333	0.701754385964912	0.666666666666667	0.721428571428571	0.859649122807018
CHEMBL3215216	0.569387755102041	0.584302325581395	0.636764705882353	0.689795918367347	0.848837209302326	0.523529411764706	0.836734693877551	0.88953488372093	0.676470588235294	0.583673469387755	0.901162790697674	0.520588235294118	0.820408163265306	0.709302325581395	0.641176470588235
CHEMBL2363239	0.492063492063492	0.651515151515151	0.671875	0.75	0.724242424242424	0.848958333333333	0.73015873015873	0.693939393939394	0.645833333333333	0.642857142857143	0.587878787878788	0.807291666666667	0.742063492063492	0.742424242424242	0.729166666666667
CHEMBL2363434	0.733333333333333	0.569230769230769	0.608465608465608	0.728571428571429	0.638461538461539	0.793650793650794	0.752380952380952	0.634615384615385	0.71957671957672	0.485714285714286	0.503846153846154	0.846560846560847	0.704761904761905	0.615384615384615	0.761904761904762
CHEMBL2114717	0.274193548387097	0.382936507936508	0.46551724137931	0.532258064516129	0.521825396825397	0.655172413793103	0.467741935483871	0.505952380952381	0.618390804597701	0.403225806451613	0.537698412698413	0.590804597701149	0.451612903225806	0.51984126984127	0.609195402298851
CHEMBL2363688	0.586206896551724	0.723958333333333	0.504273504273504	0.768472906403941	0.838541666666667	0.696581196581197	0.74384236453202	0.729166666666667	0.623931623931624	0.58128078817734	0.760416666666667	0.777777777777778	0.753694581280788	0.885416666666667	0.615384615384615
CHEMBL2363152	0.629166666666667	0.577777777777778	0.735294117647059	0.625	0.55	0.717647058823529	0.7125	0.555555555555556	0.852941176470588	0.579166666666667	0.577777777777778	0.711764705882353	0.754166666666667	0.511111111111111	0.811764705882353
CHEMBL1738040	0.541125541125541	0.371428571428571	0.594746716697936	0.567099567099567	0.415584415584416	0.459662288930582	0.614718614718615	0.316883116883117	0.393996247654784	0.502164502164502	0.419480519480519	0.292682926829268	0.554112554112554	0.431168831168831	0.418386491557223
CHEMBL2363141	0.5625	0.736559139784946	0.597402597402597	0.705357142857143	0.870967741935484	0.766233766233766	0.745535714285714	0.935483870967742	0.675324675324675	0.46875	0.752688172043011	0.627705627705628	0.790178571428571	0.924731182795699	0.722943722943723
CHEMBL2363803	0.6375	0.693121693121693	0.77037037037037	0.795833333333333	0.708994708994709	0.837037037037037	0.745833333333333	0.658730158730159	0.692592592592593	0.6375	0.582010582010582	0.788888888888889	0.754166666666667	0.674603174603175	0.774074074074074
CHEMBL2363623	0.568181818181818	0.789940828402367	0.68421052631579	0.718181818181818	0.710059171597633	0.773279352226721	0.618181818181818	0.745562130177515	0.777327935222672	0.572727272727273	0.671597633136095	0.631578947368421	0.609090909090909	0.789940828402367	0.850202429149798
CHEMBL2363211	0.58974358974359	0.742063492063492	0.819444444444444	0.676282051282051	0.738095238095238	0.895833333333333	0.650641025641026	0.757936507936508	0.819444444444445	0.557692307692308	0.753968253968254	0.597222222222222	0.621794871794872	0.698412698412698	0.888888888888889
CHEMBL2363594	0.363636363636364	0.765873015873016	0.712418300653595	0.787878787878788	0.738095238095238	0.830065359477124	0.5	0.76984126984127	0.738562091503268	0.356060606060606	0.761904761904762	0.816993464052288	0.583333333333333	0.817460317460317	0.843137254901961
CHEMBL2363236	0.564814814814815	0.885185185185185	0.623376623376623	0.595679012345679	0.877777777777778	0.753246753246753	0.759259259259259	0.848148148148148	0.636363636363636	0.648148148148148	0.848148148148148	0.757575757575758	0.768518518518518	0.762962962962963	0.614718614718615
CHEMBL2363549	0.494318181818182	0.498316498316498	0.808333333333333	0.505681818181818	0.555555555555556	0.866666666666667	0.625	0.525252525252525	0.833333333333333	0.642045454545454	0.538720538720539	0.8	0.613636363636364	0.491582491582492	0.766666666666667
CHEMBL2363387	0.404040404040404	0.644562334217507	0.623188405797101	0.525252525252525	0.687002652519894	0.652173913043478	0.68013468013468	0.748010610079576	0.516908212560386	0.333333333333333	0.631299734748011	0.555555555555556	0.656565656565657	0.809018567639257	0.579710144927536
CHEMBL2363180	0.56	0.639705882352941	0.647826086956522	0.609230769230769	0.647058823529412	0.678260869565217	0.707692307692308	0.761029411764706	0.626086956521739	0.332307692307692	0.606617647058823	0.68695652173913	0.716923076923077	0.801470588235294	0.743478260869565
CHEMBL2363577	0.592105263157895	0.703007518796992	0.607142857142857	0.723684210526316	0.74812030075188	0.764285714285714	0.618421052631579	0.718045112781955	0.628571428571429	0.653508771929824	0.703007518796992	0.65	0.609649122807018	0.74812030075188	0.692857142857143
CHEMBL2363252	0.622222222222222	0.594771241830065	0.65546218487395	0.716666666666667	0.568627450980392	0.567226890756303	0.577777777777778	0.728758169934641	0.672268907563025	0.527777777777778	0.581699346405229	0.672268907563025	0.527777777777778	0.660130718954248	0.705882352941177
CHEMBL2363630	0.566666666666667	0.72280701754386	0.585714285714286	0.866666666666667	0.684210526315789	0.685714285714286	0.7	0.694736842105263	0.685714285714286	0.611111111111111	0.617543859649123	0.614285714285714	0.659259259259259	0.67719298245614	0.728571428571429
CHEMBL2363216	0.550173010380623	0.614958448753463	0.671717171717172	0.653979238754325	0.6398891966759	0.767676767676768	0.685121107266436	0.706371191135734	0.611111111111111	0.633217993079585	0.592797783933518	0.676767676767677	0.643598615916955	0.628808864265928	0.707070707070707
CHEMBL2363535	0.545454545454545	0.665634674922601	0.61328125	0.736842105263158	0.690402476780186	0.7109375	0.727272727272727	0.687306501547988	0.66015625	0.641148325358852	0.665634674922601	0.63671875	0.736842105263158	0.702786377708978	0.7265625
CHEMBL2363368	0.575396825396825	0.654605263157895	0.734567901234568	0.821428571428572	0.661184210526316	0.858024691358025	0.726190476190476	0.648026315789474	0.728395061728395	0.571428571428571	0.595394736842105	0.759259259259259	0.658730158730159	0.713815789473684	0.753086419753086
CHEMBL2363618	0.583333333333333	0.5	0.647959183673469	0.579166666666667	0.676691729323308	0.744897959183674	0.716666666666667	0.759398496240602	0.688775510204082	0.608333333333333	0.62406015037594	0.693877551020408	0.704166666666667	0.639097744360902	0.714285714285714
CHEMBL2363774	0.660919540229885	0.821428571428571	0.681159420289855	0.505747126436782	0.797619047619048	0.826086956521739	0.603448275862069	0.75	0.734299516908212	0.459770114942529	0.773809523809524	0.729468599033816	0.568965517241379	0.813492063492063	0.758454106280193
CHEMBL1614503	0.647849462365591	0.686213991769547	0.75	0.761648745519713	0.65843621399177	0.707070707070707	0.661290322580645	0.617283950617284	0.694444444444445	0.770609318996416	0.693415637860082	0.704545454545455	0.627240143369176	0.662551440329218	0.707070707070707
CHEMBL2363389	0.565476190476191	0.721739130434783	0.623529411764706	0.720238095238095	0.710144927536232	0.76078431372549	0.699404761904762	0.678260869565217	0.607843137254902	0.553571428571429	0.478260869565217	0.650980392156863	0.678571428571429	0.744927536231884	0.611764705882353
CHEMBL2363477	0.625	0.618881118881119	0.56140350877193	0.680555555555556	0.496503496503496	0.652631578947368	0.75462962962963	0.618881118881119	0.652631578947368	0.5	0.541958041958042	0.526315789473684	0.680555555555556	0.618881118881119	0.649122807017544
CHEMBL2363834	0.567460317460317	0.708333333333333	0.583333333333333	0.607142857142857	0.746212121212121	0.653508771929824	0.619047619047619	0.757575757575757	0.649122807017544	0.523809523809524	0.693181818181818	0.631578947368421	0.682539682539682	0.723484848484849	0.710526315789474
CHEMBL1794367	0.966071428571429	0.808823529411765	0.885882352941176	0.908928571428571	0.829411764705882	0.865882352941176	0.898214285714286	0.785294117647059	0.901176470588235	0.941071428571429	0.829411764705882	0.898823529411765	0.898214285714286	0.852941176470588	0.905882352941176
CHEMBL2363440	0.704761904761905	0.681818181818182	0.614285714285714	0.812698412698413	0.776515151515151	0.704761904761905	0.692063492063492	0.662878787878788	0.595238095238095	0.644444444444444	0.738636363636364	0.642857142857143	0.638095238095238	0.700757575757576	0.638095238095238
CHEMBL2363363	0.508333333333333	0.565096952908587	0.65	0.591666666666667	0.49584487534626	0.675	0.691666666666667	0.609418282548477	0.7125	0.508333333333333	0.548476454293629	0.670833333333333	0.658333333333333	0.617728531855956	0.683333333333333
CHEMBL2363369	0.635964912280702	0.5625	0.62396694214876	0.728070175438597	0.659722222222222	0.714876033057851	0.644736842105263	0.614583333333333	0.628099173553719	0.513157894736842	0.559027777777778	0.661157024793388	0.706140350877193	0.590277777777778	0.673553719008265
CHEMBL2363435	0.586363636363636	0.748484848484849	0.715686274509804	0.713636363636364	0.678787878787879	0.730392156862745	0.763636363636364	0.763636363636364	0.843137254901961	0.545454545454545	0.624242424242424	0.573529411764706	0.740909090909091	0.745454545454545	0.862745098039216
CHEMBL2363223	0.564102564102564	0.568253968253968	0.593582887700535	0.602564102564103	0.606349206349206	0.67379679144385	0.628205128205128	0.647619047619048	0.727272727272727	0.673076923076923	0.701587301587302	0.524064171122995	0.551282051282051	0.650793650793651	0.770053475935829
CHEMBL2363851	0.524691358024691	0.680555555555556	0.68452380952381	0.592592592592593	0.659722222222222	0.791666666666667	0.783950617283951	0.777777777777778	0.738095238095238	0.672839506172839	0.552083333333333	0.738095238095238	0.796296296296296	0.760416666666667	0.744047619047619
CHEMBL2363575	0.650980392156863	0.664819944598338	0.726890756302521	0.780392156862745	0.71191135734072	0.840336134453782	0.674509803921569	0.606648199445983	0.651260504201681	0.63921568627451	0.673130193905817	0.756302521008403	0.654901960784314	0.709141274238227	0.726890756302521
CHEMBL2363443	0.579861111111111	0.681818181818182	0.75	0.663194444444444	0.691919191919192	0.785714285714286	0.65625	0.646464646464647	0.55952380952381	0.465277777777778	0.545454545454545	0.666666666666667	0.614583333333333	0.666666666666667	0.619047619047619
CHEMBL2363273	0.590277777777778	0.558922558922559	0.677777777777778	0.631944444444444	0.548821548821549	0.774074074074074	0.770833333333333	0.632996632996633	0.585185185185185	0.513888888888889	0.565656565656566	0.592592592592593	0.777777777777778	0.622895622895623	0.677777777777778
CHEMBL2363655	0.474358974358974	0.670289855072464	0.561497326203209	0.435897435897436	0.559782608695652	0.802139037433155	0.666666666666667	0.682971014492754	0.705882352941176	0.44017094017094	0.509057971014493	0.636363636363636	0.594017094017094	0.668478260869565	0.727272727272727
CHEMBL2363242	0.57037037037037	0.688888888888889	0.625	0.777777777777778	0.808333333333333	0.8875	0.714814814814815	0.702777777777778	0.7875	0.6	0.658333333333333	0.675	0.755555555555556	0.755555555555556	0.79375
CHEMBL2363367	0.378260869565217	0.62987012987013	0.462809917355372	0.669565217391304	0.623376623376623	0.710743801652893	0.639130434782609	0.662337662337662	0.574380165289256	0.317391304347826	0.422077922077922	0.640495867768595	0.6	0.551948051948052	0.628099173553719
CHEMBL2363561	0.741626794258373	0.722727272727273	0.7	0.861244019138756	0.681818181818182	0.725	0.799043062200957	0.672727272727273	0.7375	0.736842105263158	0.572727272727273	0.7375	0.708133971291866	0.718181818181818	0.825
CHEMBL2363771	0.606666666666667	0.776785714285714	0.569444444444444	0.766666666666667	0.6875	0.75	0.646666666666667	0.669642857142857	0.657407407407407	0.593333333333333	0.654761904761905	0.680555555555556	0.69	0.726190476190476	0.685185185185185
CHEMBL2363238	0.545751633986928	0.622222222222222	0.7	0.699346405228758	0.655555555555556	0.791666666666667	0.676470588235294	0.575	0.7625	0.470588235294118	0.516666666666667	0.6625	0.673202614379085	0.566666666666667	0.7625
CHEMBL1613904	0.597826086956522	0.611244019138756	0.57703081232493	0.733695652173913	0.688995215311005	0.736694677871149	0.592391304347826	0.686602870813397	0.675070028011204	0.552795031055901	0.751196172248804	0.599439775910364	0.628105590062112	0.677033492822966	0.661064425770308
CHEMBL2363507	0.5	0.579881656804734	0.487394957983193	0.606481481481481	0.630177514792899	0.634453781512605	0.699074074074074	0.674556213017751	0.563025210084034	0.5	0.538461538461538	0.630252100840336	0.652777777777778	0.695266272189349	0.584033613445378
CHEMBL2363727	0.557291666666667	0.571428571428571	0.726315789473684	0.78125	0.646616541353384	0.796491228070175	0.65625	0.635338345864662	0.687719298245614	0.640625	0.545112781954887	0.747368421052632	0.6875	0.548872180451128	0.757894736842105
CHEMBL2363480	0.528846153846154	0.621875	0.69327731092437	0.740384615384615	0.684375	0.815126050420168	0.668269230769231	0.596875	0.638655462184874	0.620192307692308	0.590625	0.76890756302521	0.581730769230769	0.559375	0.680672268907563
CHEMBL2363187	0.61304347826087	0.599378881987578	0.482142857142857	0.726086956521739	0.596273291925466	0.705357142857143	0.708695652173913	0.571428571428571	0.589285714285714	0.752173913043478	0.642857142857143	0.647321428571429	0.717391304347826	0.546583850931677	0.602678571428571
CHEMBL2363659	0.594017094017094	0.6125	0.546218487394958	0.760683760683761	0.6875	0.747899159663866	0.67948717948718	0.629166666666667	0.718487394957983	0.623931623931624	0.604166666666667	0.655462184873949	0.670940170940171	0.595833333333333	0.798319327731092
CHEMBL2363327	0.504901960784314	0.566666666666667	0.714285714285714	0.661764705882353	0.636111111111111	0.806122448979592	0.676470588235294	0.677777777777778	0.729591836734694	0.446078431372549	0.541666666666667	0.775510204081633	0.686274509803922	0.672222222222222	0.841836734693878
CHEMBL2363154	0.598958333333333	0.48780487804878	0.548387096774194	0.453125	0.804878048780488	0.798387096774194	0.546875	0.158536585365854	0.556451612903226	0.473958333333333	0.182926829268293	0.556451612903226	0.427083333333333	0.402439024390244	0.580645161290323
CHEMBL2363469	0.503759398496241	0.578947368421053	0.623809523809524	0.575187969924812	0.701754385964912	0.742857142857143	0.733082706766917	0.681286549707602	0.661904761904762	0.530075187969925	0.532163742690058	0.757142857142857	0.669172932330827	0.657894736842105	0.690476190476191
CHEMBL2363275	0.451515151515152	0.541666666666667	0.579166666666667	0.515151515151515	0.601190476190476	0.625	0.684848484848485	0.732142857142857	0.55	0.584848484848485	0.520833333333333	0.6375	0.621212121212121	0.660714285714286	0.525
CHEMBL2363248	0.558823529411765	0.567307692307692	0.642857142857143	0.625	0.602564102564103	0.776190476190476	0.669117647058824	0.673076923076923	0.714285714285714	0.536764705882353	0.544871794871795	0.604761904761905	0.636029411764706	0.721153846153846	0.69047619047619
CHEMBL2363374	0.55952380952381	0.643229166666667	0.673076923076923	0.761904761904762	0.723958333333333	0.788461538461538	0.62797619047619	0.682291666666667	0.701923076923077	0.556547619047619	0.591145833333333	0.759615384615385	0.642857142857143	0.666666666666667	0.740384615384615
CHEMBL2363397	0.640909090909091	0.601851851851852	0.790598290598291	0.881818181818182	0.604938271604938	0.88034188034188	0.663636363636364	0.608024691358025	0.752136752136752	0.627272727272727	0.533950617283951	0.730769230769231	0.6	0.601851851851852	0.782051282051282
CHEMBL2363811	0.528846153846154	0.779310344827586	0.683333333333333	0.5625	0.882758620689655	0.905555555555556	0.716346153846154	0.844827586206897	0.844444444444444	0.519230769230769	0.758620689655172	0.822222222222222	0.677884615384615	0.848275862068966	0.877777777777778
CHEMBL2363208	0.582010582010582	0.5	0.583333333333333	0.740740740740741	0.51875	0.544444444444445	0.71957671957672	0.63125	0.705555555555556	0.592592592592593	0.564583333333333	0.544444444444445	0.740740740740741	0.579166666666667	0.755555555555556
CHEMBL2363212	0.567901234567901	0.684027777777778	0.65	0.62962962962963	0.586805555555556	0.706666666666667	0.675925925925926	0.725694444444444	0.623333333333333	0.549382716049383	0.590277777777778	0.636666666666667	0.623456790123457	0.71875	0.656666666666667
CHEMBL2363373	0.481605351170569	0.684027777777778	0.574660633484163	0.608695652173913	0.628472222222222	0.669683257918552	0.612040133779264	0.673611111111111	0.574660633484163	0.505016722408027	0.659722222222222	0.529411764705882	0.645484949832776	0.576388888888889	0.638009049773756
CHEMBL2363657	0.471590909090909	0.604395604395604	0.704453441295547	0.602272727272727	0.615384615384615	0.684210526315789	0.613636363636364	0.567765567765568	0.700404858299595	0.539772727272727	0.498168498168498	0.680161943319838	0.625	0.542124542124542	0.765182186234818
CHEMBL2363160	0.541666666666667	0.494545454545455	0.536842105263158	0.6125	0.512727272727273	0.721052631578947	0.733333333333333	0.632727272727273	0.6	0.479166666666667	0.454545454545454	0.673684210526316	0.720833333333333	0.563636363636364	0.668421052631579
CHEMBL2363846	0.408888888888889	0.514492753623188	0.625	0.56	0.521739130434783	0.65625	0.688888888888889	0.626811594202899	0.65625	0.466666666666667	0.536231884057971	0.598958333333333	0.626666666666667	0.630434782608696	0.734375
CHEMBL3215276	0.663194444444444	0.578947368421053	0.263157894736842	0.829861111111111	0.75	0.907894736842105	0.916666666666667	0.855263157894737	0.868421052631579	0.881944444444445	0.552631578947368	0.868421052631579	0.909722222222222	0.828947368421053	0.881578947368421
CHEMBL2363740	0.630681818181818	0.891975308641975	0.666666666666667	0.6875	0.876543209876543	0.848484848484849	0.818181818181818	0.91358024691358	0.821969696969697	0.585227272727273	0.873456790123457	0.670454545454546	0.8125	0.916666666666667	0.837121212121212
CHEMBL2363218	0.507739938080495	0.7	0.703703703703704	0.637770897832817	0.74375	0.800925925925926	0.665634674922601	0.703125	0.694444444444444	0.365325077399381	0.6375	0.680555555555556	0.640866873065016	0.778125	0.726851851851852
CHEMBL2363224	0.650793650793651	0.623529411764706	0.692982456140351	0.813492063492063	0.626470588235294	0.785087719298246	0.674603174603175	0.65	0.609649122807017	0.615079365079365	0.532352941176471	0.741228070175439	0.650793650793651	0.644117647058824	0.68859649122807
CHEMBL2363529	0.466666666666667	0.615151515151515	0.533333333333333	0.613333333333333	0.560606060606061	0.704761904761905	0.742222222222222	0.787878787878788	0.661904761904762	0.635555555555556	0.512121212121212	0.561904761904762	0.764444444444444	0.73030303030303	0.666666666666667
CHEMBL2363713	0.696428571428571	0.673076923076923	0.68125	0.898809523809524	0.705128205128205	0.75	0.779761904761905	0.689102564102564	0.71875	0.672619047619048	0.657051282051282	0.7375	0.732142857142857	0.685897435897436	0.71875
CHEMBL2363820	0.604166666666667	0.502631578947368	0.576923076923077	0.788194444444444	0.51578947368421	0.747863247863248	0.663194444444445	0.560526315789474	0.55982905982906	0.53125	0.502631578947368	0.568376068376068	0.635416666666667	0.618421052631579	0.623931623931624
CHEMBL2363314	0.52536231884058	0.528985507246377	0.48051948051948	0.735507246376812	0.670289855072464	0.653679653679654	0.710144927536232	0.641304347826087	0.666666666666667	0.5	0.677536231884058	0.675324675324675	0.66304347826087	0.659420289855073	0.727272727272727
CHEMBL2363635	0.535714285714286	0.763546798029557	0.691358024691358	0.637755102040816	0.660098522167488	0.823045267489712	0.709183673469388	0.74384236453202	0.707818930041152	0.48469387755102	0.669950738916256	0.814814814814815	0.739795918367347	0.817733990147783	0.753086419753086
CHEMBL2363352	0.578595317725753	0.64	0.698717948717949	0.735785953177258	0.65	0.743589743589744	0.595317725752508	0.625	0.557692307692308	0.655518394648829	0.6075	0.762820512820513	0.622073578595318	0.6275	0.717948717948718
CHEMBL2363631	0.538194444444444	0.633333333333333	0.692307692307692	0.736111111111111	0.683333333333333	0.882051282051282	0.743055555555556	0.708333333333333	0.779487179487179	0.520833333333333	0.616666666666667	0.851282051282051	0.666666666666667	0.754166666666667	0.841025641025641
CHEMBL2363221	0.605769230769231	0.797979797979798	0.611111111111111	0.581730769230769	0.757575757575758	0.7	0.783653846153846	0.77020202020202	0.755555555555556	0.663461538461538	0.803030303030303	0.661111111111111	0.735576923076923	0.757575757575758	0.722222222222222
CHEMBL2363178	0.607692307692308	0.805	0.737373737373737	0.742307692307692	0.76	0.792929292929293	0.719230769230769	0.805	0.767676767676768	0.676923076923077	0.63	0.747474747474747	0.742307692307692	0.845	0.772727272727273
CHEMBL2363546	0.611111111111111	0.748677248677249	0.76890756302521	0.795138888888889	0.748677248677249	0.840336134453782	0.708333333333333	0.69047619047619	0.735294117647059	0.434027777777778	0.58994708994709	0.802521008403361	0.65625	0.64021164021164	0.831932773109244
CHEMBL2363343	0.541501976284585	0.727272727272727	0.638095238095238	0.794466403162055	0.751748251748252	0.757142857142857	0.774703557312253	0.769230769230769	0.704761904761905	0.600790513833992	0.70979020979021	0.752380952380952	0.778656126482213	0.734265734265734	0.728571428571429
CHEMBL2363210	0.548611111111111	0.591478696741855	0.746666666666667	0.583333333333333	0.62406015037594	0.795555555555556	0.677083333333333	0.604010025062657	0.653333333333333	0.524305555555556	0.551378446115288	0.671111111111111	0.625	0.586466165413534	0.751111111111111
CHEMBL2363452	0.552631578947368	0.648829431438127	0.597744360902256	0.671052631578947	0.755852842809365	0.729323308270677	0.614035087719298	0.675585284280936	0.684210526315789	0.416666666666667	0.692307692307692	0.571428571428571	0.600877192982456	0.712374581939799	0.710526315789474
CHEMBL2363171	0.62037037037037	0.6875	0.333333333333333	0.717592592592593	0.734375	0.777777777777778	0.75	0.755208333333333	0.632850241545894	0.449074074074074	0.552083333333333	0.555555555555556	0.787037037037037	0.739583333333333	0.685990338164251
CHEMBL2363445	0.547794117647059	0.689285714285714	0.687179487179487	0.805147058823529	0.753571428571429	0.835897435897436	0.757352941176471	0.682142857142857	0.743589743589744	0.569852941176471	0.653571428571429	0.81025641025641	0.746323529411765	0.757142857142857	0.805128205128205
CHEMBL2363319	0.685185185185185	0.595533498759305	0.494949494949495	0.515432098765432	0.610421836228288	0.631313131313131	0.734567901234568	0.684863523573201	0.752525252525252	0.447530864197531	0.622828784119107	0.606060606060606	0.722222222222222	0.67741935483871	0.782828282828283
CHEMBL2363559	0.602564102564103	0.675213675213675	0.649305555555556	0.794871794871795	0.735042735042735	0.743055555555556	0.717948717948718	0.773504273504274	0.677083333333333	0.717948717948718	0.670940170940171	0.680555555555556	0.713675213675214	0.752136752136752	0.71875
CHEMBL2363796	0.583710407239819	0.508333333333333	0.507407407407407	0.868778280542986	0.625	0.644444444444444	0.760180995475113	0.5875	0.633333333333333	0.606334841628959	0.541666666666667	0.592592592592593	0.737556561085973	0.5	0.625925925925926
CHEMBL2363214	0.551470588235294	0.712280701754386	0.678571428571429	0.75	0.666666666666667	0.799107142857143	0.591911764705882	0.740350877192982	0.660714285714286	0.511029411764706	0.607017543859649	0.700892857142857	0.573529411764706	0.614035087719298	0.705357142857143
CHEMBL2363377	0.598214285714286	0.662538699690402	0.605882352941177	0.797619047619048	0.777089783281734	0.747058823529412	0.678571428571428	0.69969040247678	0.664705882352941	0.532738095238095	0.656346749226006	0.641176470588235	0.654761904761905	0.789473684210526	0.723529411764706
CHEMBL2363370	0.536666666666667	0.592948717948718	0.442857142857143	0.573333333333333	0.67948717948718	0.657142857142857	0.626666666666667	0.666666666666667	0.553571428571429	0.56	0.586538461538462	0.639285714285714	0.673333333333333	0.567307692307692	0.582142857142857
CHEMBL2363454	0.605263157894737	0.582417582417582	0.614814814814815	0.800751879699248	0.652014652014652	0.714814814814815	0.725563909774436	0.641025641025641	0.674074074074074	0.721804511278195	0.593406593406593	0.596296296296296	0.725563909774436	0.600732600732601	0.707407407407407
CHEMBL1614231	0.583333333333333	0.56	0.65625	0.655753968253968	0.733333333333333	0.701388888888889	0.62797619047619	0.52	0.638888888888889	0.52281746031746	0.666666666666667	0.680555555555556	0.596230158730159	0.603333333333333	0.704861111111111
CHEMBL2363425	0.582706766917293	0.539393939393939	0.642156862745098	0.729323308270677	0.590909090909091	0.808823529411765	0.733082706766917	0.645454545454546	0.799019607843137	0.556390977443609	0.512121212121212	0.607843137254902	0.736842105263158	0.703030303030303	0.838235294117647
CHEMBL2363831	0.566666666666667	0.768888888888889	0.605263157894737	0.679166666666667	0.68	0.652631578947368	0.741666666666667	0.795555555555556	0.626315789473684	0.6875	0.653333333333333	0.742105263157895	0.766666666666667	0.68	0.636842105263158
CHEMBL1614216	0.542542542542543	0.633461047254151	0.619047619047619	0.721221221221221	0.766283524904214	0.681972789115646	0.62012012012012	0.665389527458493	0.593537414965986	0.603603603603604	0.775862068965517	0.707482993197279	0.706206206206206	0.638569604086845	0.598639455782313
CHEMBL2363644	0.505952380952381	0.532567049808429	0.522727272727273	0.577380952380952	0.593869731800766	0.761363636363636	0.803571428571429	0.590038314176245	0.727272727272727	0.523809523809524	0.582375478927203	0.727272727272727	0.821428571428571	0.67816091954023	0.6875
CHEMBL2363166	0.6	0.636363636363636	0.644230769230769	0.719444444444444	0.772727272727273	0.810897435897436	0.672222222222222	0.79020979020979	0.701923076923077	0.461111111111111	0.702797202797203	0.759615384615385	0.711111111111111	0.744755244755245	0.788461538461538
CHEMBL2363446	0.551470588235294	0.639285714285714	0.642533936651584	0.742647058823529	0.703571428571429	0.809954751131222	0.727941176470588	0.760714285714286	0.760180995475113	0.566176470588235	0.614285714285714	0.705882352941176	0.746323529411765	0.675	0.819004524886878
CHEMBL2363470	0.523148148148148	0.726530612244898	0.670833333333333	0.615740740740741	0.681632653061225	0.7125	0.62037037037037	0.689795918367347	0.520833333333333	0.388888888888889	0.612244897959184	0.616666666666667	0.648148148148148	0.820408163265306	0.558333333333333
CHEMBL1613814	0.736521739130435	0.752351097178683	0.580769230769231	0.796521739130435	0.936259143155695	0.651923076923077	0.815652173913043	0.926854754440961	0.701923076923077	0.747826086956522	0.899686520376176	0.644230769230769	0.815652173913043	0.959247648902821	0.736538461538462
CHEMBL2363645	0.63961038961039	0.67032967032967	0.593137254901961	0.668831168831169	0.64010989010989	0.740196078431372	0.646103896103896	0.642857142857143	0.745098039215686	0.396103896103896	0.532967032967033	0.656862745098039	0.623376623376623	0.695054945054945	0.759803921568627
CHEMBL1738021	0.575	0.633720930232558	0.45	0.735714285714286	0.662790697674419	0.75625	0.65	0.767441860465116	0.81875	0.6	0.819767441860465	0.85625	0.739285714285714	0.674418604651163	0.9
CHEMBL2363516	0.6	0.705329153605016	0.768181818181818	0.589090909090909	0.699059561128527	0.804545454545455	0.770909090909091	0.717868338557994	0.8	0.643636363636364	0.551724137931034	0.686363636363636	0.723636363636364	0.670846394984326	0.813636363636364
CHEMBL1614147	0.62015503875969	0.39	0.9	0.75968992248062	0.96	0.6	0.782945736434109	0.8	1	0.829457364341085	0.92	0.366666666666667	0.565891472868217	0.52	0.966666666666667
CHEMBL2363492	0.428571428571429	0.903508771929824	0.793650793650794	0.535714285714286	0.745614035087719	0.888888888888889	0.476190476190476	0.885964912280702	0.783068783068783	0.363095238095238	0.947368421052632	0.825396825396825	0.505952380952381	0.947368421052632	0.814814814814815
CHEMBL2363696	0.525490196078431	0.69047619047619	0.777777777777778	0.768627450980392	0.734126984126984	0.869047619047619	0.662745098039216	0.742063492063492	0.805555555555556	0.349019607843137	0.579365079365079	0.714285714285714	0.623529411764706	0.801587301587302	0.805555555555556
CHEMBL1614486	0.537946428571429	0.537190082644628	0.733333333333333	0.747767857142857	0.714876033057851	0.733333333333333	0.678571428571429	0.65495867768595	0.711111111111111	0.71875	0.776859504132231	0.666666666666667	0.707589285714286	0.630165289256198	0.755555555555556
CHEMBL2363847	0.615384615384615	0.780058651026393	0.689814814814815	0.716783216783217	0.756598240469208	0.800925925925926	0.814685314685315	0.69208211143695	0.796296296296296	0.601398601398601	0.721407624633431	0.675925925925926	0.758741258741259	0.744868035190616	0.833333333333333
CHEMBL2363719	0.689285714285714	0.50297619047619	0.560606060606061	0.710714285714286	0.514880952380952	0.636363636363636	0.578571428571429	0.645833333333333	0.535353535353535	0.425	0.5	0.555555555555556	0.571428571428571	0.630952380952381	0.616161616161616
CHEMBL2363634	0.603125	0.705263157894737	0.533333333333333	0.821875	0.747368421052632	0.685185185185185	0.65625	0.689473684210526	0.637037037037037	0.515625	0.586842105263158	0.596296296296296	0.6375	0.702631578947368	0.640740740740741
CHEMBL2363569	0.56140350877193	0.565096952908587	0.5375	0.596491228070175	0.684210526315789	0.6375	0.578947368421053	0.662049861495845	0.6	0.564912280701754	0.542936288088643	0.658333333333333	0.564912280701754	0.698060941828255	0.616666666666667
CHEMBL2363294	0.645614035087719	0.613888888888889	0.566964285714286	0.87719298245614	0.616666666666667	0.6875	0.642105263157895	0.569444444444444	0.504464285714286	0.582456140350877	0.502777777777778	0.696428571428571	0.635087719298246	0.608333333333333	0.571428571428571
CHEMBL2363616	0.547058823529412	0.657754010695187	0.605042016806723	0.685294117647059	0.649732620320856	0.819327731092437	0.732352941176471	0.695187165775401	0.785714285714286	0.382352941176471	0.588235294117647	0.764705882352941	0.697058823529412	0.788770053475936	0.88235294117647
CHEMBL2363601	0.555882352941176	0.572727272727273	0.566964285714286	0.723529411764706	0.6	0.732142857142857	0.647058823529412	0.665909090909091	0.754464285714286	0.567647058823529	0.477272727272727	0.745535714285714	0.605882352941176	0.613636363636364	0.705357142857143
CHEMBL2363514	0.573333333333333	0.87962962962963	0.696581196581197	0.635555555555556	0.884259259259259	0.799145299145299	0.662222222222222	0.935185185185185	0.807692307692308	0.462222222222222	0.921296296296296	0.786324786324786	0.715555555555556	0.949074074074074	0.867521367521368
CHEMBL2363748	0.477777777777778	0.65843621399177	0.465384615384615	0.727777777777778	0.798353909465021	0.726923076923077	0.677777777777778	0.716049382716049	0.634615384615385	0.427777777777778	0.497942386831276	0.715384615384615	0.666666666666667	0.613168724279835	0.7
CHEMBL2363747	0.619047619047619	0.602272727272727	0.676923076923077	0.767857142857143	0.693181818181818	0.873076923076923	0.6875	0.659090909090909	0.776923076923077	0.592261904761905	0.599431818181818	0.676923076923077	0.672619047619048	0.627840909090909	0.8
CHEMBL2363457	0.606349206349206	0.571428571428571	0.665178571428571	0.755555555555556	0.658385093167702	0.8125	0.746031746031746	0.599378881987578	0.584821428571429	0.631746031746032	0.496894409937888	0.736607142857143	0.761904761904762	0.608695652173913	0.580357142857143
CHEMBL1613949	0.787037037037037	0.835164835164835	0.688087774294671	0.918518518518519	0.973137973137973	0.838557993730408	0.862962962962963	0.893772893772894	0.778996865203762	0.938888888888889	0.885225885225885	0.772727272727273	0.864814814814815	0.963369963369963	0.769592476489028
CHEMBL2363767	0.515037593984962	0.670068027210884	0.615384615384615	0.710526315789474	0.697278911564626	0.807692307692308	0.695488721804511	0.795918367346939	0.807692307692308	0.477443609022556	0.608843537414966	0.71978021978022	0.733082706766917	0.751700680272109	0.851648351648352
CHEMBL2363793	0.534615384615385	0.65034965034965	0.594117647058824	0.719230769230769	0.762237762237762	0.705882352941176	0.742307692307692	0.800699300699301	0.535294117647059	0.661538461538462	0.671328671328671	0.7	0.730769230769231	0.748251748251748	0.576470588235294
CHEMBL2363692	0.594444444444445	0.522352941176471	0.669642857142857	0.702777777777778	0.661176470588235	0.8125	0.586111111111111	0.562352941176471	0.6875	0.461111111111111	0.548235294117647	0.75	0.536111111111111	0.595294117647059	0.736607142857143
CHEMBL2363639	0.610294117647059	0.601023017902813	0.584558823529412	0.8125	0.626598465473146	0.713235294117647	0.768382352941176	0.659846547314578	0.650735294117647	0.547794117647059	0.593350383631714	0.6875	0.702205882352941	0.624040920716113	0.6875
CHEMBL2363421	0.691244239631336	0.733333333333333	0.72463768115942	0.617511520737327	0.846153846153846	0.847826086956522	0.691244239631336	0.641025641025641	0.681159420289855	0.373271889400922	0.635897435897436	0.608695652173913	0.608294930875576	0.702564102564103	0.702898550724638
CHEMBL2363313	0.729166666666667	0.738095238095238	0.675324675324675	0.841666666666667	0.782738095238095	0.857142857142857	0.745833333333333	0.69047619047619	0.75974025974026	0.541666666666667	0.62202380952381	0.688311688311688	0.7125	0.732142857142857	0.837662337662338
CHEMBL2363798	0.45	0.567857142857143	0.570135746606335	0.690909090909091	0.639285714285714	0.701357466063348	0.713636363636364	0.828571428571429	0.574660633484163	0.568181818181818	0.503571428571429	0.728506787330317	0.690909090909091	0.735714285714286	0.574660633484163
CHEMBL2363272	0.658333333333333	0.616228070175438	0.595238095238095	0.645833333333333	0.682017543859649	0.738095238095238	0.8375	0.721491228070176	0.69047619047619	0.491666666666667	0.50219298245614	0.552380952380952	0.8	0.671052631578947	0.728571428571429
CHEMBL2363447	0.600732600732601	0.678571428571429	0.555194805194805	0.648351648351648	0.804945054945055	0.733766233766234	0.728937728937729	0.667582417582418	0.613636363636364	0.571428571428572	0.675824175824176	0.779220779220779	0.706959706959707	0.659340659340659	0.623376623376623
CHEMBL2363749	0.566176470588235	0.591331269349845	0.645833333333333	0.705882352941176	0.61609907120743	0.692708333333333	0.636029411764706	0.684210526315789	0.588541666666667	0.580882352941176	0.544891640866873	0.614583333333333	0.643382352941176	0.693498452012384	0.614583333333333
CHEMBL1738438	0.6	0.674418604651163	0.825581395348837	0.581818181818182	0.0697674418604651	0.186046511627907	0.559090909090909	0.27906976744186	0.0232558139534884	0.409090909090909	0.255813953488372	0.372093023255814	0.4	0	0
CHEMBL2114847	0.55640243902439	0.642222222222222	0.71078431372549	0.649390243902439	0.753333333333333	0.647058823529412	0.594512195121951	0.564444444444444	0.519607843137255	0.606707317073171	0.615555555555556	0.769607843137255	0.734756097560976	0.702222222222222	0.475490196078431
CHEMBL2363388	0.368421052631579	0.643636363636364	0.583710407239819	0.596491228070175	0.723636363636364	0.606334841628959	0.653508771929825	0.749090909090909	0.583710407239819	0.535087719298246	0.607272727272727	0.606334841628959	0.635964912280702	0.756363636363636	0.588235294117647
CHEMBL1614035	0.878787878787879	0.925925925925926	0.848484848484849	0.96969696969697	0.989417989417989	0.912878787878788	0.943722943722944	0.962962962962963	0.888257575757576	0.952380952380952	0.978835978835979	0.935606060606061	0.952380952380952	0.986772486772487	0.926136363636364
CHEMBL2363830	0.557017543859649	0.648809523809524	0.672727272727273	0.600877192982456	0.696428571428571	0.781818181818182	0.5	0.720238095238095	0.613636363636364	0.552631578947368	0.589285714285714	0.845454545454545	0.557017543859649	0.660714285714286	0.668181818181818
CHEMBL2363255	0.5	0.61734693877551	0.516666666666667	0.482608695652174	0.627551020408163	0.694444444444444	0.678260869565217	0.729591836734694	0.516666666666667	0.473913043478261	0.525510204081633	0.594444444444444	0.691304347826087	0.841836734693878	0.511111111111111
CHEMBL2363562	0.648026315789474	0.634674922600619	0.729166666666667	0.776315789473684	0.681114551083591	0.8375	0.601973684210526	0.674922600619195	0.783333333333333	0.506578947368421	0.572755417956656	0.675	0.588815789473684	0.653250773993808	0.833333333333333
CHEMBL2363335	0.47985347985348	0.579861111111111	0.652777777777778	0.754578754578755	0.694444444444444	0.712962962962963	0.743589743589744	0.78125	0.648148148148148	0.509157509157509	0.659722222222222	0.680555555555556	0.710622710622711	0.732638888888889	0.708333333333333
CHEMBL2363338	0.315151515151515	0.674242424242424	0.557142857142857	0.681818181818182	0.765151515151515	0.733333333333333	0.648484848484848	0.712121212121212	0.7	0.406060606060606	0.628787878787879	0.69047619047619	0.563636363636364	0.76010101010101	0.69047619047619
CHEMBL1614395	0.632275132275132	0.534848484848485	0.487912087912088	0.669312169312169	0.537878787878788	0.564835164835165	0.653439153439153	0.421212121212121	0.393406593406593	0.608465608465608	0.53030303030303	0.501098901098901	0.560846560846561	0.484848484848485	0.391208791208791
CHEMBL2363334	0.577294685990338	0.666666666666667	0.614583333333333	0.739130434782609	0.713450292397661	0.625	0.673913043478261	0.672514619883041	0.739583333333333	0.454106280193237	0.652046783625731	0.701388888888889	0.630434782608696	0.695906432748538	0.753472222222222
CHEMBL1614007	0.672972972972973	0.774509803921569	0.672727272727273	0.383783783783784	0.303921568627451	0.581818181818182	0.47027027027027	0.519607843137255	0.63030303030303	0.475675675675676	0.470588235294118	0.763636363636364	0.47027027027027	0.490196078431373	0.612121212121212
CHEMBL1614049	0.506775067750677	0.578478002378121	0.614942528735632	0.64769647696477	0.695600475624257	0.722222222222222	0.523035230352303	0.695600475624257	0.718390804597701	0.60840108401084	0.755648038049941	0.613026819923372	0.501355013550136	0.692033293697979	0.718390804597701
CHEMBL1034535	0.967171717171717	0.95	0.826086956521739	0.987373737373737	0.9	0.840579710144928	0.94949494949495	0.9625	0.826086956521739	0.939393939393939	0.775	0.659420289855072	0.936868686868687	0.8625	0.840579710144927
CHEMBL1613853	0.564453125	0.459627329192547	0.547058823529412	0.7294921875	0.631469979296066	0.638235294117647	0.5654296875	0.656314699792961	0.517647058823529	0.630859375	0.65527950310559	0.652941176470588	0.6064453125	0.575569358178054	0.6
CHEMBL1614138	0.488425925925926	0.576041666666667	0.664285714285714	0.590277777777778	0.633333333333333	0.703571428571429	0.652777777777778	0.729166666666667	0.819642857142857	0.596064814814815	0.73125	0.746428571428571	0.627314814814815	0.71875	0.751785714285714
CHEMBL2363814	0.548872180451128	0.699604743083004	0.64	0.642857142857143	0.810276679841897	0.785	0.635338345864662	0.711462450592885	0.58	0.432330827067669	0.754940711462451	0.845	0.62781954887218	0.774703557312253	0.63
CHEMBL2363245	0.572727272727273	0.708502024291498	0.610714285714286	0.695454545454545	0.748987854251012	0.775	0.813636363636364	0.724696356275304	0.742857142857143	0.672727272727273	0.639676113360324	0.621428571428571	0.795454545454545	0.748987854251012	0.739285714285714
CHEMBL2363349	0.75	0.758241758241758	0.703703703703704	0.848214285714286	0.78021978021978	0.837962962962963	0.735119047619048	0.750915750915751	0.694444444444444	0.598214285714286	0.63003663003663	0.680555555555556	0.666666666666667	0.772893772893773	0.662037037037037
CHEMBL2363794	0.534090909090909	0.683431952662722	0.646428571428571	0.715909090909091	0.769230769230769	0.792857142857143	0.715909090909091	0.707100591715976	0.660714285714286	0.443181818181818	0.757396449704142	0.771428571428571	0.721590909090909	0.745562130177515	0.714285714285714
CHEMBL856174	0.783783783783784	0.365079365079365	0.6	0.648648648648649	0.222222222222222	0.15	0.0135135135135135	0.0793650793650794	0.35	0.675675675675676	0.142857142857143	0.9	0	0.714285714285714	0.55
CHEMBL1964005	0.482051282051282	0.701754385964912	1	0.753846153846154	0.785087719298246	0.982758620689655	0.682051282051282	0.842105263157895	0.844827586206897	0.81025641025641	0.820175438596491	0.862068965517241	0.779487179487179	0.675438596491228	0.887931034482759
CHEMBL1963983	0.695	0.768518518518518	0.788235294117647	0.69	0.655864197530864	0.845098039215686	0.805	0.74537037037037	0.862745098039216	0.7375	0.606481481481482	0.77843137254902	0.7375	0.609567901234568	0.833333333333333
CHEMBL2363215	0.557823129251701	0.590909090909091	0.574660633484163	0.571428571428571	0.769230769230769	0.710407239819005	0.619047619047619	0.688811188811189	0.714932126696833	0.585034013605442	0.681818181818182	0.570135746606335	0.574829931972789	0.667832167832168	0.692307692307692
CHEMBL1613890	0.497222222222222	0.61598440545809	0.576726342710997	0.663888888888889	0.740740740740741	0.677749360613811	0.502777777777778	0.637426900584795	0.60613810741688	0.547222222222222	0.66374269005848	0.521739130434783	0.463888888888889	0.686159844054581	0.664961636828644
CHEMBL1614363	0.517647058823529	0.842592592592593	0.860902255639098	0.676470588235294	0.798148148148148	0.663533834586466	0.6	0.809259259259259	0.637218045112782	0.614705882352941	0.750925925925926	0.609962406015038	0.623529411764706	0.807407407407407	0.669172932330827
CHEMBL1022010	0.994318181818182	0.838709677419355	0.803030303030303	0.948863636363636	0.887096774193548	0.924242424242424	0.982954545454545	0.870967741935484	0.757575757575758	0.994318181818182	0.645161290322581	0.863636363636364	0.920454545454545	0.887096774193548	0.863636363636364
CHEMBL1613962	0.551948051948052	0.55327868852459	0.375	0.785714285714286	0.619877049180328	0.4	0.785714285714286	0.671789617486339	0.35	0.603896103896104	0.403346994535519	0.125	0.785714285714286	0.6150956284153	0.325
CHEMBL1614244	0.546875	0.533625730994152	0.616666666666667	0.675347222222222	0.599415204678363	0.615833333333333	0.657986111111111	0.505847953216374	0.595833333333333	0.628472222222222	0.505847953216374	0.5925	0.579861111111111	0.538011695906433	0.614166666666667
CHEMBL2363764	0.571428571428571	0.586206896551724	0.583333333333333	0.617511520737327	0.74294670846395	0.799242424242424	0.84331797235023	0.648902821316614	0.636363636363636	0.728110599078341	0.64576802507837	0.742424242424242	0.838709677419355	0.711598746081505	0.666666666666667
CHEMBL1614405	0.814285714285714	0.513888888888889	0.863636363636364	0.742857142857143	0.833333333333333	0.825174825174825	0.828571428571429	0.763888888888889	0.734265734265734	0.742857142857143	0.763888888888889	0.685314685314685	0.8	0.722222222222222	0.769230769230769
CHEMBL1613926	0.739130434782609	0.524	0.216666666666667	0.58695652173913	0.515333333333333	0.308333333333333	0.688405797101449	0.537333333333333	0.691666666666667	0.702898550724638	0.555666666666667	0.591666666666667	0.731884057971014	0.523333333333333	0.658333333333333
CHEMBL1614492	0.619883040935672	0.656666666666667	0.598888888888889	0.702485380116959	0.7	0.731111111111111	0.608918128654971	0.708333333333333	0.557777777777778	0.542397660818713	0.749166666666667	0.682222222222222	0.642543859649123	0.683333333333333	0.608888888888889
CHEMBL2363716	0.571428571428572	0.642361111111111	0.56078431372549	0.626050420168067	0.635416666666667	0.698039215686274	0.701680672268908	0.736111111111111	0.670588235294118	0.546218487394958	0.53125	0.650980392156863	0.697478991596639	0.625	0.737254901960784
CHEMBL1243972	0.778481012658228	0.791304347826087	0.90625	0.727848101265823	0.834782608695652	0.90625	0.440928270042194	0.652173913043478	0.625	0.867088607594937	0.756521739130435	0.84375	0.675105485232067	0.591304347826087	0.84375
CHEMBL1614053	0.541666666666667	0.517857142857143	0.604166666666667	0.697751322751323	0.694940476190476	0.683333333333333	0.59457671957672	0.708333333333333	0.683333333333333	0.622354497354497	0.718005952380952	0.6875	0.607804232804233	0.62202380952381	0.710416666666667
CHEMBL829401	0.789473684210526	0.863636363636364	0.837837837837838	0.618421052631579	0.852272727272727	0.810810810810811	0.355263157894737	0.541666666666667	0.599099099099099	0.875	0.867424242424242	0.788288288288288	0.421052631578947	0.772727272727273	0.747747747747748
CHEMBL2363167	0.619047619047619	0.827586206896552	0.765182186234818	0.706349206349206	0.862068965517241	0.765182186234818	0.813492063492063	0.793103448275862	0.688259109311741	0.595238095238095	0.650246305418719	0.704453441295547	0.821428571428571	0.847290640394089	0.688259109311741
CHEMBL2363592	0.521164021164021	0.51890756302521	0.527777777777778	0.579365079365079	0.602941176470588	0.71031746031746	0.563492063492063	0.647058823529412	0.607142857142857	0.433862433862434	0.447478991596639	0.71031746031746	0.582010582010582	0.590336134453782	0.599206349206349
CHEMBL2363599	0.481366459627329	0.749379652605459	0.666666666666667	0.580745341614907	0.689826302729529	0.727272727272727	0.649068322981367	0.734491315136476	0.757575757575758	0.503105590062112	0.662531017369727	0.556818181818182	0.673913043478261	0.744416873449132	0.742424242424242
CHEMBL1613942	0.53405572755418	0.586805555555556	0.585294117647059	0.598297213622291	0.746527777777778	0.738235294117647	0.523993808049536	0.772569444444444	0.732352941176471	0.509287925696594	0.676215277777778	0.7	0.530185758513932	0.708333333333333	0.758823529411765
CHEMBL1614463	0.585227272727273	0.53448275862069	0.606481481481482	0.659090909090909	0.597701149425287	0.518518518518519	0.599431818181818	0.622605363984674	0.493055555555556	0.619318181818182	0.588122605363985	0.50462962962963	0.553977272727273	0.634099616858238	0.506944444444444
CHEMBL1614132	0.544155844155844	0.645380434782609	0.640625	0.676623376623377	0.71195652173913	0.739583333333333	0.651948051948052	0.747282608695652	0.72172619047619	0.615584415584415	0.724864130434783	0.77827380952381	0.638961038961039	0.690217391304348	0.742559523809524
CHEMBL2363633	0.495238095238095	0.652173913043478	0.668269230769231	0.549206349206349	0.754940711462451	0.6875	0.746031746031746	0.754940711462451	0.615384615384615	0.520634920634921	0.636363636363636	0.774038461538462	0.736507936507937	0.758893280632411	0.673076923076923
CHEMBL1963934	0.857758620689655	0.730769230769231	0.306451612903226	0.413793103448276	0.538461538461538	0.17741935483871	0.504310344827586	1	0.709677419354839	0.741379310344828	0.974358974358974	0.919354838709677	0.706896551724138	0.846153846153846	0.838709677419355
CHEMBL2363557	0.666666666666667	0.836538461538461	0.625	0.736666666666667	0.852564102564103	0.827205882352941	0.736666666666667	0.823717948717949	0.746323529411765	0.463333333333333	0.717948717948718	0.632352941176471	0.766666666666667	0.846153846153846	0.727941176470588
CHEMBL1614283	0.813186813186813	0.829881656804734	0.686274509803922	0.917582417582418	0.869822485207101	0.686274509803922	0.901098901098901	0.795857988165681	0.642156862745098	0.876373626373626	0.740384615384615	0.637254901960784	0.843406593406593	0.819526627218935	0.661764705882353
CHEMBL1614548	0.634259259259259	0.689732142857143	0.585227272727273	0.703703703703704	0.668154761904762	0.863636363636364	0.712962962962963	0.764880952380952	0.943181818181818	0.583333333333333	0.619047619047619	0.738636363636364	0.763888888888889	0.680059523809524	0.965909090909091
CHEMBL2363458	0.515942028985507	0.578181818181818	0.494071146245059	0.663768115942029	0.629090909090909	0.723320158102767	0.55072463768116	0.636363636363636	0.66403162055336	0.611594202898551	0.549090909090909	0.628458498023715	0.565217391304348	0.72	0.711462450592885
CHEMBL2354217	0.495908346972177	0.5125	0.619565217391304	0.803600654664484	0.7375	0.680124223602484	0.762684124386252	0.775	0.720496894409938	0.684124386252046	0.772222222222222	0.782608695652174	0.723404255319149	0.729166666666667	0.614906832298137
CHEMBL1738633	0.404255319148936	0.572222222222222	0.66	0.51063829787234	0.5	0.586666666666667	0.148936170212766	0.188888888888889	0.573333333333333	0.212765957446809	0.611111111111111	0.633333333333333	0.170212765957447	0.477777777777778	0.62
CHEMBL1613950	0.593434343434343	0.560200668896321	0.583333333333333	0.736111111111111	0.632107023411371	0.725	0.598484848484849	0.627090301003345	0.714583333333333	0.587121212121212	0.679765886287625	0.779166666666667	0.659090909090909	0.600334448160535	0.747916666666667
CHEMBL2114928	0.517543859649123	0.723529411764706	0.681940700808625	0.504385964912281	0.558823529411765	0.528301886792453	0.364035087719298	0.413725490196078	0.584905660377358	0.631578947368421	0.519607843137255	0.617250673854447	0.478070175438596	0.472549019607843	0.415094339622641
CHEMBL2363385	0.582236842105263	0.589285714285714	0.647058823529412	0.766447368421053	0.699404761904762	0.80672268907563	0.740131578947368	0.726190476190476	0.752100840336134	0.467105263157895	0.523809523809524	0.634453781512605	0.786184210526316	0.705357142857143	0.798319327731092
CHEMBL1614066	0.628571428571429	0.546875	0.544444444444445	0.257142857142857	0.96875	0.648888888888889	0.571428571428571	0.90625	0.742222222222222	0.214285714285714	0.9375	0.622222222222222	0.571428571428571	0.90625	0.568888888888889
CHEMBL1614109	0.766666666666667	0.666666666666667	0.5825	0.742424242424242	0.798816568047337	0.728333333333333	0.836363636363636	0.656804733727811	0.546666666666667	0.654545454545455	0.784023668639053	0.691666666666667	0.815151515151515	0.79585798816568	0.573333333333333
CHEMBL1737868	0.837209302325581	0.919871794871795	0.820454545454545	0.748062015503876	0.80982905982906	0.897727272727273	0.717054263565892	0.800213675213675	0.702272727272727	0.744186046511628	0.78525641025641	0.852272727272727	0.624031007751938	0.893162393162393	0.725
CHEMBL1614477	0.631578947368421	0.613782051282051	0.743333333333333	0.694901315789474	0.67948717948718	0.713333333333333	0.703125	0.685897435897436	0.728888888888889	0.625822368421053	0.738782051282051	0.813333333333333	0.716282894736842	0.697115384615385	0.76
CHEMBL1794460	0.561507936507937	0.585470085470085	0.597014925373134	0.635912698412698	0.591880341880342	0.718017057569296	0.609126984126984	0.487179487179487	0.731876332622601	0.676587301587302	0.634081196581197	0.674307036247335	0.665674603174603	0.606837606837607	0.664712153518124
CHEMBL1614197	0.391891891891892	0.47	0.397435897435897	0.452702702702703	0.38	0.615384615384615	0.445945945945946	0.3	0.653846153846154	0.662162162162162	0.5	0.564102564102564	0.486486486486487	0.28	0.371794871794872
CHEMBL2354228	0.799431009957326	0.644444444444444	0.791666666666667	0.810810810810811	0.709259259259259	0.87719298245614	0.812233285917496	0.648148148148148	0.855263157894737	0.774063537221432	0.718518518518519	0.964912280701754	0.824087245139877	0.67962962962963	0.837719298245614
CHEMBL1737978	0.557407407407407	0.642857142857143	0.639689578713969	0.525925925925926	0.569858712715856	0.662971175166297	0.466666666666667	0.547880690737834	0.57649667405765	0.374074074074074	0.593406593406593	0.58980044345898	0.485185185185185	0.607535321821036	0.616407982261641
CHEMBL2363383	0.68	0.804597701149425	0.740909090909091	0.6	0.758620689655172	0.877272727272727	0.706666666666667	0.865900383141762	0.777272727272727	0.453333333333333	0.701149425287356	0.704545454545455	0.715555555555556	0.835249042145594	0.804545454545455
CHEMBL2363656	0.517482517482518	0.5625	0.53804347826087	0.604895104895105	0.5625	0.652173913043478	0.685314685314685	0.727678571428571	0.646739130434783	0.513986013986014	0.383928571428571	0.527173913043478	0.657342657342657	0.736607142857143	0.614130434782609
CHEMBL1614225	0.574938574938575	0.5234375	0.552631578947368	0.592137592137592	0.5859375	0.652631578947368	0.631449631449632	0.5703125	0.542105263157895	0.670761670761671	0.6640625	0.626315789473684	0.635135135135135	0.575520833333333	0.494736842105263
CHEMBL1738400	0.9004329004329	0.949127906976744	0.850378787878788	0.961038961038961	0.991279069767442	0.912878787878788	0.96969696969697	0.979651162790698	0.878787878787879	0.922077922077922	0.979651162790698	0.9375	0.96969696969697	0.982558139534884	0.910984848484848
CHEMBL1738679	0.677631578947368	0.37719298245614	0.5	0.618421052631579	0.36140350877193	0.49078947368421	0.555921052631579	0.301754385964912	0.507894736842105	0.457236842105263	0.302631578947368	0.394736842105263	0.539473684210526	0.312280701754386	0.431578947368421
CHEMBL1738043	0.80672268907563	0.589134125636672	0.766129032258065	0.791316526610644	0.892614601018676	0.783870967741936	0.662464985994398	0.861205432937182	0.744086021505376	0.791316526610644	0.827249575551783	0.754301075268817	0.707282913165266	0.794142614601019	0.778494623655914
CHEMBL1738202	0.0869565217391304	0.945454545454545	0.697368421052632	1	0.763636363636364	0.986842105263158	1	0.909090909090909	0.986842105263158	0.956521739130435	0.981818181818182	0.973684210526316	0.956521739130435	0.672727272727273	0.973684210526316
CHEMBL1614550	0.739285714285714	0.627358490566038	0.659574468085106	0.607142857142857	0.547169811320755	0.791489361702128	0.589285714285714	0.484276729559748	0.74468085106383	0.614285714285714	0.515723270440252	0.88936170212766	0.475	0.562893081761006	0.68936170212766
CHEMBL2363390	0.602006688963211	0.686111111111111	0.597222222222222	0.635451505016722	0.719444444444444	0.708333333333333	0.749163879598662	0.694444444444444	0.532407407407407	0.558528428093645	0.555555555555556	0.699074074074074	0.739130434782609	0.619444444444444	0.611111111111111
CHEMBL1737977	0.433333333333333	0.684722222222222	0.763157894736842	0.776190476190476	0.816666666666667	0.9	0.723809523809524	0.755555555555556	0.91578947368421	0.833333333333333	0.783333333333333	0.852631578947368	0.814285714285714	0.7	0.905263157894737
CHEMBL2114823	0.453333333333333	0.657971014492754	0.654761904761905	0.653333333333333	0.659420289855073	0.489795918367347	0.577777777777778	0.563768115942029	0.433673469387755	0.602222222222222	0.673913043478261	0.542517006802721	0.68	0.573913043478261	0.578231292517007
CHEMBL1243978	0.613060428849903	0.506944444444444	0.757575757575758	0.606237816764133	0.583333333333333	0.696969696969697	0.517543859649123	0.611111111111111	0.651515151515152	0.741715399610136	0.534722222222222	0.727272727272727	0.398635477582846	0.416666666666667	0.651515151515151
CHEMBL2363839	0.6	0.6675	0.669642857142857	0.777777777777778	0.68	0.700892857142857	0.772222222222222	0.67	0.723214285714286	0.519444444444444	0.7325	0.678571428571429	0.677777777777778	0.7175	0.75
CHEMBL1243969	0.563541666666667	0.885714285714286	0.75	0.7125	0.914285714285714	0.775	0.532291666666667	0.733333333333333	0.85	0.673958333333333	0.79047619047619	0.825	0.519791666666667	0.666666666666667	0.825
CHEMBL3215034	0.519157088122605	0.483164983164983	0.66	0.741379310344828	0.658249158249158	0.781333333333333	0.704980842911877	0.611111111111111	0.598666666666667	0.597701149425287	0.634680134680135	0.774666666666667	0.762452107279693	0.585858585858586	0.724
CHEMBL914418	1	0.979591836734694	0.904761904761905	0.995833333333333	0.995918367346939	0.80952380952381	1	0.963265306122449	0.80952380952381	0.719444444444444	0.889795918367347	0.904761904761905	0.995833333333333	0.938775510204082	0.857142857142857
CHEMBL1738197	0.655172413793103	0.582752613240418	0.69	0.731800766283525	0.850609756097561	0.732222222222222	0.57088122605364	0.722560975609756	0.633333333333333	0.701149425287356	0.781794425087108	0.693333333333333	0.578544061302682	0.715592334494774	0.67
CHEMBL698689	0.673333333333333	0.730769230769231	0.846153846153846	0.626666666666667	0.653846153846154	0.692307692307692	0.43	0.192307692307692	0.461538461538462	0.588333333333333	0.615384615384615	0.692307692307692	0.773333333333333	0.346153846153846	0.923076923076923
CHEMBL2363707	0.494505494505495	0.662745098039216	0.682051282051282	0.619047619047619	0.647058823529412	0.892307692307692	0.6996336996337	0.690196078431373	0.779487179487179	0.538461538461539	0.525490196078431	0.723076923076923	0.633699633699634	0.627450980392157	0.82051282051282
CHEMBL2363795	0.578125	0.596491228070175	0.702380952380952	0.809375	0.660818713450292	0.821428571428572	0.625	0.584795321637427	0.73015873015873	0.59375	0.570175438596491	0.694444444444444	0.5875	0.64327485380117	0.714285714285714
CHEMBL3215176	0.790909090909091	0.907407407407407	0.817934782608696	0.75	0.708333333333333	0.929347826086957	0.727272727272727	0.898148148148148	0.923913043478261	0.843181818181818	0.87962962962963	0.826086956521739	0.918181818181818	0.847222222222222	0.880434782608696
CHEMBL1614329	0.636974789915966	0.658045977011494	0.659090909090909	0.608403361344538	0.728448275862069	0.674242424242424	0.610084033613445	0.658045977011494	0.611111111111111	0.510084033613445	0.725574712643678	0.666666666666667	0.603361344537815	0.695402298850575	0.656565656565657
CHEMBL1676103	0.972222222222222	0.931216931216931	0.88448275862069	0.975694444444444	0.948853615520282	0.81551724137931	0.954861111111111	0.932980599647266	0.848275862068966	0.914930555555556	0.731922398589065	0.86551724137931	0.975694444444444	0.922398589065256	0.88448275862069
CHEMBL3214997	0.694711538461538	0.783962264150943	0.666666666666667	0.740384615384615	0.715094339622642	0.700854700854701	0.621394230769231	0.745283018867925	0.66951566951567	0.703125	0.70377358490566	0.705128205128205	0.655048076923077	0.795283018867925	0.66951566951567
CHEMBL2363695	0.497076023391813	0.673529411764706	0.674074074074074	0.774853801169591	0.632352941176471	0.888888888888889	0.690058479532164	0.676470588235294	0.833333333333333	0.707602339181287	0.685294117647059	0.733333333333333	0.681286549707602	0.735294117647059	0.918518518518519
CHEMBL1794393	0.90448343079922	0.720512820512821	0.846372688477952	0.940545808966862	0.870512820512821	0.823613086770982	0.923001949317739	0.815384615384615	0.812233285917496	0.934697855750487	0.778205128205128	0.84352773826458	0.927875243664717	0.805128205128205	0.789473684210526
CHEMBL1243975	0.68810051736881	0.7	0.8	0.662232076866223	0.733333333333333	0.85	0.48780487804878	0.716666666666667	0.8	0.620473022912047	0.633333333333333	0.875	0.441980783444198	0.35	0.9
CHEMBL830839	1	0.980769230769231	0.974358974358974	1	1	1	1	1	1	1	0.961538461538462	1	1	1	1
CHEMBL2363315	0.642857142857143	0.662087912087912	0.535087719298246	0.662337662337662	0.615384615384615	0.631578947368421	0.675324675324675	0.675824175824176	0.600877192982456	0.61038961038961	0.568681318681319	0.565789473684211	0.662337662337662	0.563186813186813	0.614035087719298
CHEMBL1614117	0.513157894736842	0.40625	0.37037037037037	0.473684210526316	0.65625	0.953703703703704	0.453947368421053	0.515625	0.805555555555556	0.440789473684211	0.46875	0.666666666666667	0.473684210526316	0.546875	0.657407407407407
CHEMBL1737951	0.821875	0.671394799054373	0.8328125	0.865625	0.784278959810875	0.88125	0.7375	0.575059101654846	0.76171875	0.86875	0.747340425531915	0.7875	0.765625	0.563829787234043	0.796875
CHEMBL1614065	0.463793103448276	0.46	0.423333333333333	0.631034482758621	0.5	0.686666666666667	0.544827586206897	0.436666666666667	0.496666666666667	0.558620689655172	0.45	0.536666666666667	0.555172413793103	0.54	0.5
CHEMBL1614393	0.485416666666667	0.567708333333333	0.555555555555556	0.717708333333333	0.710069444444445	0.677083333333333	0.698958333333333	0.789930555555556	0.727430555555556	0.642708333333333	0.705729166666667	0.661458333333333	0.695833333333333	0.713541666666667	0.720486111111111
CHEMBL1613907	0.0181818181818182	0.360576923076923	0.191176470588235	0.109090909090909	0.567307692307692	0.308823529411765	0.581818181818182	0.634615384615385	0.514705882352941	0.0727272727272727	0.567307692307692	0.632352941176471	0.527272727272727	0.663461538461538	0.441176470588235
CHEMBL1964010	0.579939668174962	0.631864406779661	0.627218934911243	0.416289592760181	0.59728813559322	0.457100591715976	0.431372549019608	0.490847457627119	0.501479289940828	0.389140271493213	0.545084745762712	0.338757396449704	0.484162895927602	0.579661016949153	0.461538461538462
CHEMBL2098499	0.798245614035088	0.775862068965517	0.763265306122449	0.833333333333333	0.758620689655172	0.679591836734694	0.690058479532164	0.758620689655172	0.759183673469388	0.713450292397661	0.640804597701149	0.761224489795918	0.725146198830409	0.82183908045977	0.757142857142857
CHEMBL1963940	0.934895833333333	0.936274509803922	0.980952380952381	0.986979166666667	0.988970588235294	0.983333333333333	0.947916666666667	0.952205882352941	0.990476190476191	0.989583333333333	0.96078431372549	0.990476190476191	0.981770833333333	0.977941176470588	0.980952380952381
CHEMBL2363737	0.54	0.515789473684211	0.540909090909091	0.543333333333333	0.652631578947368	0.559090909090909	0.583333333333333	0.536842105263158	0.663636363636364	0.52	0.55	0.581818181818182	0.586666666666667	0.652631578947368	0.686363636363636
CHEMBL641707	0.744791666666667	1	0.975	0.791666666666667	1	0.95	0.729166666666667	1	1	0.794270833333333	1	0.975	0.5625	1	0.975
CHEMBL653167	0.9	0.985815602836879	0.978070175438597	0.875	0.99290780141844	1	0.95	0.985815602836879	0.921052631578947	0.45	0.865248226950355	0.903508771929825	0.95	0.985815602836879	0.942982456140351
CHEMBL2303649	0.9	0.533333333333333	0.979166666666667	0.88	0.633333333333333	1	0.7	0.483333333333333	0.916666666666667	0.88	0.616666666666667	0.916666666666667	0.54	0.566666666666667	0.916666666666667
CHEMBL830842	0.789473684210526	0.829545454545455	0.86036036036036	0.631578947368421	0.852272727272727	0.761261261261261	0.394736842105263	0.625	0.594594594594595	0.914473684210526	0.859848484848485	0.734234234234234	0.315789473684211	0.761363636363636	0.77027027027027
CHEMBL1963930	0.523809523809524	1	0.766081871345029	0.583333333333333	0.883333333333333	0.672514619883041	0.523809523809524	0.966666666666667	0.783625730994152	0.571428571428571	0.733333333333333	0.818713450292398	0.505952380952381	0.55	0.923976608187134
CHEMBL3215006	0.691919191919192	0.646666666666667	0.662774725274725	0.798989898989899	0.781333333333333	0.750686813186813	0.680808080808081	0.748	0.726648351648352	0.839393939393939	0.757333333333333	0.732142857142857	0.74040404040404	0.744	0.65728021978022
CHEMBL1614215	0.647321428571429	0.652840909090909	0.598260869565217	0.702380952380952	0.645454545454545	0.474782608695652	0.619047619047619	0.548863636363636	0.448695652173913	0.521577380952381	0.727272727272727	0.521739130434782	0.610119047619048	0.592045454545455	0.436521739130435
CHEMBL1963813	0.671626984126984	0.779411764705882	0.704678362573099	0.74702380952381	0.867647058823529	0.792397660818713	0.739087301587302	0.811274509803922	0.805555555555556	0.798611111111111	0.748774509803922	0.775584795321637	0.711309523809524	0.823529411764706	0.761695906432749
CHEMBL2114839	0.606666666666667	0.702133333333333	0.658212560386473	0.62375	0.644533333333333	0.705314009661836	0.562916666666667	0.641866666666667	0.677536231884058	0.627916666666667	0.620533333333333	0.655797101449275	0.58625	0.656266666666667	0.727053140096618
CHEMBL1738362	0.726495726495726	0.813636363636364	0.8	0.72008547008547	0.963636363636364	0.957142857142857	0.702991452991453	0.877272727272727	0.923809523809524	0.69017094017094	0.909090909090909	0.880952380952381	0.700854700854701	0.906818181818182	0.914285714285714
CHEMBL2114742	0.592857142857143	0.55548128342246	0.640732265446224	0.667142857142857	0.697860962566845	0.645308924485126	0.604285714285714	0.748663101604278	0.613272311212815	0.704285714285714	0.672459893048128	0.564073226544622	0.672857142857143	0.798128342245989	0.676201372997712
CHEMBL1613897	0.75	0.700490998363339	0.708502024291498	0.825050709939148	0.801350245499182	0.760458839406208	0.858519269776876	0.794803600654664	0.819838056680162	0.769776876267748	0.852495908346972	0.685560053981107	0.854969574036511	0.868862520458265	0.789473684210526
CHEMBL1614092	0.56390977443609	0.640625	0.66	0.696240601503759	0.7825	0.695	0.63609022556391	0.675	0.67	0.659398496240602	0.734375	0.578333333333333	0.681203007518797	0.68375	0.648333333333333
CHEMBL2354305	0.614	0.565454545454545	0.795918367346939	0.81	0.676363636363636	0.719387755102041	0.802	0.8	0.755102040816326	0.66	0.798181818181818	0.841836734693878	0.746	0.685454545454545	0.770408163265306
CHEMBL1738319	0.746153846153846	0.717705167173252	0.787119856887299	0.832234432234432	0.718844984802432	0.74865831842576	0.823443223443223	0.720364741641337	0.682468694096601	0.84029304029304	0.678571428571429	0.725402504472272	0.836630036630037	0.688449848024316	0.840787119856887
CHEMBL1034533	0.929878048780488	0.979166666666667	0.950738916256157	0.884146341463415	0.9375	0.926108374384237	0.98780487804878	0.9375	0.935960591133005	0.814024390243902	0.895833333333333	0.866995073891626	0.972560975609756	0.8125	0.940886699507389
CHEMBL2363573	0.607843137254902	0.6275	0.63265306122449	0.803921568627451	0.64	0.72108843537415	0.729411764705882	0.675	0.755102040816327	0.482352941176471	0.63	0.707482993197279	0.670588235294118	0.6825	0.812925170068027
CHEMBL1243970	0.81551724137931	0.842105263157895	0.968253968253968	0.522413793103448	0.952631578947368	1	0.568965517241379	0.821052631578947	0.904761904761905	0.792241379310345	0.815789473684211	0.984126984126984	0.542241379310345	0.921052631578947	0.841269841269841
CHEMBL1738080	0.926406926406926	0.928571428571428	0.875	0.961038961038961	0.925925925925926	0.931985294117647	0.965367965367965	0.888888888888889	0.900735294117647	0.913419913419913	0.886243386243386	0.946691176470588	0.96969696969697	0.902116402116402	0.939338235294118
CHEMBL3214958	0.486842105263158	0.484747023809524	0.681904761904762	0.565789473684211	0.60639880952381	0.72	0.605263157894737	0.569940476190476	0.598095238095238	0.686842105263158	0.532738095238095	0.699047619047619	0.592105263157895	0.607142857142857	0.620952380952381
CHEMBL1613871	0.472413793103448	0.344827586206897	0.610576923076923	0.7	0.896551724137931	0.4375	0.586206896551724	0.870689655172414	0.673076923076923	0.555172413793103	0.75	0.471153846153846	0.627586206896552	0.818965517241379	0.725961538461539
CHEMBL2114863	0.54610492845787	0.606666666666667	0.688025210084034	0.689984101748808	0.731666666666667	0.775210084033613	0.666136724960254	0.696666666666667	0.714285714285714	0.670906200317965	0.611666666666667	0.804621848739496	0.713831478537361	0.705	0.78781512605042
CHEMBL1614509	0.805288461538461	0.758928571428571	0.844169246646027	0.920673076923077	0.819444444444444	0.844169246646027	0.847355769230769	0.811507936507937	0.933952528379773	0.852163461538461	0.859126984126984	0.865325077399381	0.861778846153846	0.781746031746032	0.868937048503612
CHEMBL1613785	0.679236912156167	0.700764006791171	0.561298076923077	0.776841171251109	0.808998302207131	0.616586538461538	0.587843833185448	0.783531409168082	0.59375	0.649955634427684	0.740662139219015	0.560096153846154	0.660603371783496	0.775042444821732	0.605769230769231
CHEMBL1738430	0.459459459459459	0.506058446186743	0.524475524475524	0.484407484407484	0.571988595866001	0.505827505827506	0.617463617463617	0.547754811119031	0.531468531468531	0.525987525987526	0.542052744119743	0.491841491841492	0.575883575883576	0.56272273699216	0.489510489510489
CHEMBL1243977	0.810688405797101	0.8	0.85	0.769021739130435	0.705882352941177	0.833333333333333	0.481884057971015	0.623529411764706	0.816666666666667	0.682971014492754	0.694117647058824	0.8	0.529891304347826	0.576470588235294	0.866666666666667
CHEMBL1738019	0.690335305719921	0.658585858585859	0.6375	0.806706114398422	0.833333333333333	0.754166666666667	0.830374753451677	0.757575757575758	0.779166666666667	0.680473372781065	0.719191919191919	0.708333333333333	0.794871794871795	0.803030303030303	0.741666666666667
CHEMBL1738091	0.89937106918239	0.812962962962963	0.746428571428571	0.927672955974843	0.735185185185185	0.671428571428571	0.908805031446541	0.762962962962963	0.596428571428571	0.921383647798742	0.774074074074074	0.5625	0.79874213836478	0.72037037037037	0.689285714285714
CHEMBL1614309	0.561143984220907	0.581113801452785	0.529970760233918	0.528599605522682	0.475383373688458	0.456140350877193	0.41025641025641	0.539951573849879	0.441520467836257	0.485207100591716	0.555286521388216	0.404970760233918	0.416173570019724	0.620661824051655	0.486842105263158
CHEMBL1963968	0.645962732919255	0.588172043010753	0.451357466063348	0.664596273291925	0.632258064516129	0.673076923076923	0.623188405797101	0.690322580645161	0.57579185520362	0.687370600414079	0.640860215053763	0.632352941176471	0.677018633540373	0.732258064516129	0.563348416289593
CHEMBL1243968	0.536891679748823	0.62962962962963	0.9	0.577708006279435	0.725925925925926	0.975	0.507064364207221	0.744444444444444	0.975	0.602040816326531	0.666666666666667	0.975	0.475667189952904	0.662962962962963	0.85
CHEMBL1963898	0.467948717948718	0.498759305210918	0.529411764705882	0.418269230769231	0.47394540942928	0.538235294117647	0.538461538461538	0.709677419354839	0.606862745098039	0.447115384615385	0.621588089330025	0.515686274509804	0.469551282051282	0.571960297766749	0.565686274509804
CHEMBL1614319	0.621052631578947	0.763636363636364	0.54375	0.78796992481203	0.790909090909091	0.506944444444444	0.760902255639098	0.781818181818182	0.477777777777778	0.724812030075188	0.678787878787879	0.515277777777778	0.771428571428572	0.85	0.531944444444444
CHEMBL1738602	0.436904761904762	0.528787878787879	0.527504105090312	0.607142857142857	0.529292929292929	0.639983579638752	0.504761904761905	0.5	0.543103448275862	0.480952380952381	0.648484848484848	0.640394088669951	0.540476190476191	0.603030303030303	0.599753694581281
CHEMBL681296	0.75	0.25	0.234782608695652	1	0.375	0.669565217391304	0.5	0.125	0.0956521739130435	0.75	0.25	0.156521739130435	0	0.125	0.156521739130435
CHEMBL3214794	0.823069403714565	0.576296296296296	0.737012987012987	0.792766373411535	0.754814814814815	0.765512265512265	0.622678396871945	0.702222222222222	0.759018759018759	0.751710654936461	0.700740740740741	0.775974025974026	0.641251221896383	0.575555555555556	0.782106782106782
CHEMBL2114844	0.395121951219512	0.502708559046587	0.465337132003799	0.548170731707317	0.472914409534128	0.707502374169041	0.528658536585366	0.541170097508126	0.627730294396961	0.527439024390244	0.56771397616468	0.435897435897436	0.520121951219512	0.559588299024919	0.691358024691358
CHEMBL1794484	0.411376492771842	0.544334975369458	0.5625	0.529226901319925	0.474548440065681	0.643055555555556	0.423632935260842	0.458128078817734	0.5625	0.524827152734129	0.490147783251232	0.538194444444444	0.421747328724073	0.502463054187192	0.588888888888889
CHEMBL1614295	0.392156862745098	0.425925925925926	0.304347826086957	0.137254901960784	0.62962962962963	0.391304347826087	0.294117647058824	0.574074074074074	0.478260869565217	0.0196078431372549	0.388888888888889	0.217391304347826	0.568627450980392	0.185185185185185	0.91304347826087
CHEMBL1738422	0.0923076923076923	0.752439024390244	0.736111111111111	0.676923076923077	0.485365853658537	0.851851851851852	0.638461538461538	0.721951219512195	0.87037037037037	0.646153846153846	0.680487804878049	0.953703703703704	0.761538461538461	0.651219512195122	0.777777777777778
CHEMBL1614072	0.60290404040404	0.752941176470588	0.696741854636591	0.792929292929293	0.762352941176471	0.802005012531328	0.705808080808081	0.785882352941176	0.784461152882206	0.736742424242424	0.804705882352941	0.684210526315789	0.741161616161616	0.741176470588235	0.81453634085213
CHEMBL1737979	0.541666666666667	0.453216374269006	0.41025641025641	0.736111111111111	0.631578947368421	0.432692307692308	0.671296296296296	0.485380116959064	0.458333333333333	0.601851851851852	0.380116959064327	0.708333333333333	0.796296296296296	0.421052631578947	0.602564102564103
CHEMBL918058	0.78494623655914	0.738805970149254	0.99	0.603345280764636	0.843283582089552	1	0.751493428912784	0.828358208955224	1	0.716248506571087	0.514925373134328	0.99	0.620071684587814	0.742537313432836	1
CHEMBL1794497	0.366666666666667	0.443693693693694	0.448888888888889	0.548148148148148	0.59009009009009	0.533333333333333	0.651851851851852	0.585585585585586	0.702222222222222	0.607407407407407	0.36036036036036	0.515555555555556	0.566666666666667	0.637387387387387	0.715555555555556
CHEMBL2114727	0.682291666666667	0.631578947368421	0.800788954635109	0.790178571428571	0.785714285714286	0.855029585798816	0.732142857142857	0.838345864661654	0.7465483234714	0.813988095238095	0.763157894736842	0.883629191321499	0.799107142857143	0.779448621553885	0.72879684418146
CHEMBL1614272	0.613247863247863	0.536949685534591	0.476214574898785	0.634615384615385	0.691037735849057	0.398785425101215	0.615384615384615	0.581761006289308	0.478744939271255	0.658119658119658	0.643081761006289	0.474696356275304	0.692307692307692	0.591981132075472	0.538461538461539
CHEMBL2378059	0.730263157894737	1	0.918918918918919	0.598684210526316	0.791666666666667	0.918918918918919	0.447368421052632	0.875	0.837837837837838	0.921052631578947	0.875	0.945945945945946	0.677631578947368	0.916666666666667	0.918918918918919
CHEMBL1737863	0.5625	0.475357710651828	0.578078078078078	0.832317073170732	0.751987281399046	0.780780780780781	0.740853658536585	0.653418124006359	0.674474474474474	0.760670731707317	0.698728139904611	0.799399399399399	0.724085365853659	0.620031796502385	0.6996996996997
CHEMBL1794445	0.655882352941176	0.716049382716049	0.862379807692308	0.755882352941176	0.724867724867725	0.930288461538462	0.614705882352941	0.735449735449735	0.942307692307692	0.723529411764706	0.661375661375661	0.90625	0.791176470588235	0.892416225749559	0.960336538461538
CHEMBL1614131	0.550847457627119	0.892086330935252	0.542735042735043	0.677966101694915	0.97841726618705	0.568376068376068	0.653601694915254	0.949640287769784	0.376068376068376	0.616525423728814	0.863309352517986	0.354700854700855	0.630296610169491	0.992805755395683	0.294871794871795
CHEMBL1614480	0.625744047619048	0.855128205128205	0.644067796610169	0.94047619047619	0.974358974358974	0.903954802259887	0.876488095238095	0.941025641025641	0.798022598870056	0.955357142857143	0.951282051282051	0.901129943502825	0.897321428571428	0.956410256410256	0.820621468926554
CHEMBL1243965	0.677647058823529	0.672619047619048	0.941176470588235	0.742745098039216	0.773809523809524	0.882352941176471	0.60078431372549	0.642857142857143	0.794117647058823	0.694117647058824	0.666666666666667	0.75	0.569411764705882	0.654761904761905	0.882352941176471
CHEMBL1614097	0.560975609756098	0.641251221896383	0.54551724137931	0.674288617886179	0.725317693059629	0.626206896551724	0.652947154471545	0.726295210166178	0.572413793103448	0.589939024390244	0.735092864125122	0.564137931034483	0.677337398373984	0.721407624633431	0.635862068965517
CHEMBL1243976	0.894230769230769	0.909774436090226	0.723809523809524	0.803485576923077	0.924812030075188	0.761904761904762	0.741586538461538	0.879699248120301	0.59047619047619	0.780649038461538	0.796992481203007	0.8	0.862980769230769	0.62406015037594	0.685714285714286
CHEMBL1963907	0.633413461538462	0.577968923418424	0.664893617021277	0.704326923076923	0.644839067702553	0.635396518375242	0.725961538461539	0.634295227524972	0.644100580270793	0.665865384615385	0.605993340732519	0.573500967117988	0.698717948717949	0.653718091009989	0.642166344294004
CHEMBL1794570	0.54228855721393	0.684343434343434	0.703767123287671	0.651741293532338	0.79040404040404	0.722602739726027	0.656716417910448	0.717171717171717	0.794520547945206	0.65547263681592	0.835858585858586	0.686643835616438	0.689054726368159	0.777777777777778	0.722602739726027
CHEMBL1963867	0.566115702479339	0.63894523326572	0.588034188034188	0.613636363636364	0.689655172413793	0.618803418803419	0.632231404958678	0.710953346855984	0.534188034188034	0.53305785123967	0.698782961460446	0.552136752136752	0.679752066115702	0.77079107505071	0.530769230769231
CHEMBL1614356	0.612535612535613	0.613756613756614	0.702962962962963	0.737179487179487	0.716931216931217	0.754074074074074	0.655982905982906	0.707671957671958	0.645925925925926	0.618945868945869	0.73478835978836	0.625185185185185	0.667378917378917	0.695767195767196	0.702222222222222
CHEMBL3215158	0.762345679012346	0.548611111111111	0.650406504065041	0.817901234567901	0.694444444444444	0.646341463414634	0.657407407407407	0.520833333333333	0.552845528455285	0.66358024691358	0.388888888888889	0.739837398373984	0.592592592592593	0.680555555555556	0.597560975609756
CHEMBL1794457	0.506666666666667	0.487179487179487	0.905555555555556	0.36	0.67948717948718	0.875	0.528	0.730769230769231	0.866666666666667	0.698666666666667	0.551282051282051	0.955555555555555	0.488	0.715384615384615	0.875
CHEMBL1613813	0.613821138211382	0.579428571428571	0.70258064516129	0.782012195121951	0.712	0.708387096774194	0.644817073170732	0.722285714285714	0.630967741935484	0.649390243902439	0.688	0.669677419354839	0.650914634146342	0.713142857142857	0.704516129032258
CHEMBL2114797	0.812971342383107	0.818376068376068	0.96	0.85369532428356	0.878205128205128	0.903529411764706	0.687028657616893	0.770655270655271	0.769411764705882	0.740573152337858	0.816239316239316	0.793725490196078	0.714932126696833	0.768518518518518	0.866666666666667
CHEMBL2354207	0.69094247246022	0.799435028248588	0.616666666666667	0.772949816401469	0.850282485875706	0.735714285714286	0.746022031823745	0.813559322033898	0.692857142857143	0.776621787025704	0.838983050847458	0.678571428571429	0.736230110159119	0.836158192090396	0.740476190476191
CHEMBL1738097	0.811290322580645	0.756493506493507	0.725806451612903	0.841935483870968	0.857142857142857	0.859447004608295	0.87258064516129	0.744588744588745	0.76036866359447	0.804838709677419	0.844155844155844	0.834101382488479	0.890322580645161	0.694805194805195	0.761520737327189
CHEMBL1963915	0.520609318996416	0.679166666666667	0.834313725490196	0.96236559139785	0.76875	0.942156862745098	0.872759856630824	0.752083333333333	0.88921568627451	0.913978494623656	0.7625	0.895098039215686	0.901433691756272	0.745833333333333	0.902941176470588
CHEMBL1613955	0.702020202020202	0.62981162981163	0.609300476947536	0.717171717171717	0.715806715806716	0.466613672496025	0.684343434343434	0.582309582309582	0.575516693163752	0.688131313131313	0.541359541359541	0.503179650238474	0.688131313131313	0.621621621621621	0.527821939586645
CHEMBL1614484	0.555555555555556	0.599067599067599	0.69010989010989	0.376811594202899	0.433566433566434	0.483516483516484	0.652173913043478	0.291375291375291	0.50989010989011	0.342995169082126	0.367132867132867	0.287912087912088	0.618357487922705	0.444055944055944	0.457142857142857
CHEMBL1963910	0.722222222222222	0.738157894736842	0.888636363636364	0.805555555555556	0.928947368421053	0.95	0.848958333333333	0.8	0.886363636363636	0.762152777777778	0.905263157894737	0.981818181818182	0.852430555555556	0.921052631578947	0.936363636363636
CHEMBL1613861	0.5296875	0.517142857142857	0.666129032258065	0.6734375	0.62	0.745161290322581	0.5515625	0.617142857142857	0.593548387096774	0.6046875	0.528571428571429	0.75	0.4875	0.613333333333333	0.730645161290323
CHEMBL1613967	0.611793611793612	0.701183431952663	0.586174242424242	0.731572481572481	0.730769230769231	0.704545454545455	0.657862407862408	0.763313609467456	0.659090909090909	0.569410319410319	0.754437869822485	0.632575757575758	0.672604422604423	0.665680473372781	0.651515151515152
CHEMBL3215154	0.656964656964657	0.688172043010753	0.715920915712799	0.674636174636175	0.759600614439324	0.739854318418314	0.637214137214137	0.708141321044547	0.614984391259105	0.573804573804574	0.608294930875576	0.612903225806452	0.681912681912682	0.762672811059908	0.651404786680541
CHEMBL1794581	0.584554334554335	0.553158705701079	0.624386252045827	0.605006105006105	0.600924499229584	0.768412438625205	0.629426129426129	0.784283513097072	0.747135842880524	0.494505494505495	0.49306625577812	0.704582651391162	0.613553113553114	0.73497688751926	0.781505728314239
CHEMBL2449559	0.987851851851852	0.994505494505495	0.928571428571429	0.995851851851852	0.997252747252747	0.869047619047619	0.990222222222222	0.986263736263736	0.797619047619048	0.846518518518518	0.945054945054945	0.964285714285714	0.992888888888889	1	0.869047619047619
CHEMBL1614425	0.575	0.478405315614618	0.66025641025641	0.602777777777778	0.476190476190476	0.59775641025641	0.486111111111111	0.427464008859358	0.487179487179487	0.527777777777778	0.497231450719823	0.629807692307692	0.4375	0.43078626799557	0.536858974358974
CHEMBL1794438	0.647707231040564	0.789495450785773	0.707627118644068	0.704585537918871	0.861869313482217	0.708568738229755	0.647266313932981	0.827956989247312	0.663370998116761	0.670194003527337	0.884615384615385	0.725047080979284	0.655202821869489	0.918114143920595	0.679378531073446
CHEMBL2114820	0.653044871794872	0.561805555555556	0.588235294117647	0.644230769230769	0.795833333333333	0.776470588235294	0.661057692307692	0.663888888888889	0.880392156862745	0.684294871794872	0.695833333333333	0.490196078431372	0.760416666666667	0.665277777777778	0.762745098039216
CHEMBL1613947	0.547008547008547	0.604197901049475	0.596989966555184	0.701923076923077	0.704647676161919	0.705685618729097	0.601495726495727	0.737631184407796	0.807692307692308	0.56517094017094	0.675412293853073	0.735785953177257	0.581196581196581	0.701649175412294	0.765886287625418
CHEMBL1613876	0.59375	0.501424501424501	0.515714285714286	0.615056818181818	0.588793922127255	0.627142857142857	0.615056818181818	0.659069325735992	0.587142857142857	0.701231060606061	0.657169990503324	0.52	0.656723484848485	0.641025641025641	0.618571428571429
CHEMBL1614259	0.61	0.456709956709957	0.658163265306122	0.783333333333333	0.742424242424242	0.895918367346939	0.546666666666667	0.688311688311688	0.6	0.703333333333333	0.658008658008658	0.740816326530612	0.576666666666667	0.590909090909091	0.720408163265306
CHEMBL1963933	0.646666666666667	0.658163265306122	0.586080586080586	0.586666666666667	0.647959183673469	0.693528693528694	0.606666666666667	0.698979591836735	0.829059829059829	0.76	0.693877551020408	0.755799755799756	0.686666666666667	0.770408163265306	0.68009768009768
CHEMBL3214959	0.774691358024691	0.680851063829787	0.739564961787184	0.727623456790124	0.719703977798335	0.799529688418577	0.720679012345679	0.670675300647549	0.753674309229865	0.662808641975309	0.769657724329325	0.81657848324515	0.689043209876543	0.666975023126735	0.75896531452087
CHEMBL2114752	0.551127819548872	0.502622377622378	0.581372549019608	0.688721804511278	0.784965034965035	0.827450980392157	0.633834586466165	0.687062937062937	0.83921568627451	0.609022556390977	0.687062937062937	0.645098039215686	0.669924812030075	0.715034965034965	0.77843137254902
CHEMBL1614516	0.754901960784314	1	0.830188679245283	0.450980392156863	0.955128205128205	0.735849056603774	0.705882352941176	0.884615384615385	0.937106918238994	0.607843137254902	0.82051282051282	0.867924528301887	0.666666666666667	0.852564102564103	0.842767295597484
CHEMBL2354303	0.630184331797235	0.612037037037037	0.545454545454545	0.642857142857143	0.62037037037037	0.390909090909091	0.777649769585253	0.687037037037037	0.704545454545455	0.706221198156682	0.666666666666667	0.840909090909091	0.661290322580645	0.777777777777778	0.640909090909091
CHEMBL3214816	0.626724137931034	0.635814889336016	0.79229797979798	0.663793103448276	0.620389000670691	0.828282828282828	0.688793103448276	0.576794097920859	0.78030303030303	0.663793103448276	0.621059691482227	0.837121212121212	0.711206896551724	0.572769953051643	0.748737373737374
CHEMBL1614287	0.590909090909091	0.614545454545455	0.672619047619048	0.363636363636364	0.678181818181818	0.678571428571429	0.386363636363636	0.734545454545455	0.5	0.196969696969697	0.661818181818182	0.625	0.424242424242424	0.616363636363636	0.419642857142857
CHEMBL1614362	0.666666666666667	0.50375	0.602693602693603	0.683333333333333	0.79	0.62962962962963	0.783333333333333	0.685	0.693602693602694	0.866666666666667	0.86	0.67003367003367	0.883333333333333	0.715	0.67003367003367
CHEMBL1614388	0.731111111111111	0.604934770277935	0.743589743589744	0.706666666666667	0.682926829268293	0.781065088757396	0.663333333333333	0.684061259217243	0.701183431952663	0.682777777777778	0.738797504254112	0.757396449704142	0.7	0.717526942711288	0.664694280078896
CHEMBL1614255	0.595918367346939	0.615149456521739	0.782407407407407	0.795918367346939	0.589673913043478	0.665343915343915	0.772789115646259	0.568614130434783	0.756613756613757	0.718367346938775	0.624320652173913	0.734126984126984	0.779591836734694	0.619565217391304	0.756613756613757
CHEMBL2354248	0.784153005464481	0.844059405940594	0.935483870967742	0.912568306010929	0.925742574257426	0.774193548387097	0.841530054644809	0.938118811881188	0.725806451612903	0.912568306010929	0.832920792079208	0.467741935483871	0.923497267759563	0.962871287128713	0.790322580645161
CHEMBL3215078	0.643543956043956	0.747747747747748	0.576190476190476	0.760302197802198	0.834658187599364	0.682539682539682	0.735576923076923	0.677795442501325	0.665079365079365	0.743131868131868	0.817700052994171	0.684920634920635	0.726648351648352	0.767885532591415	0.68015873015873
CHEMBL3214985	0.716619981325864	0.608258928571429	0.736373165618449	0.798319327731092	0.556919642857143	0.688679245283019	0.80859010270775	0.59375	0.692872117400419	0.701213818860878	0.587611607142857	0.673480083857442	0.796451914098973	0.584821428571429	0.672955974842767
CHEMBL1738599	0.845588235294118	0.58442265795207	0.617857142857143	0.834558823529412	0.601307189542484	0.707142857142857	0.746323529411765	0.547930283224401	0.767857142857143	0.724264705882353	0.736383442265795	0.664285714285714	0.709558823529412	0.660130718954248	0.717857142857143
CHEMBL1963698	0.681663837011885	0.7875	0.674347158218126	0.686757215619694	0.766346153846154	0.645468509984639	0.704584040747029	0.676923076923077	0.642396313364055	0.720713073005093	0.759134615384615	0.553609831029186	0.713921901528013	0.777884615384615	0.645161290322581
CHEMBL1794452	0.481981981981982	0.557575757575758	0.36	0.414414414414414	0.503030303030303	0.386666666666667	0.538288288288288	0.424242424242424	0.44	0.398648648648649	0.321212121212121	0.0666666666666667	0.355855855855856	0.721212121212121	0.653333333333333
CHEMBL1794296	0.8253367003367	0.852532679738562	0.907869012707722	0.926767676767677	0.970588235294118	0.967741935483871	0.801346801346801	0.963235294117647	0.961876832844575	0.904882154882155	0.963235294117647	0.957966764418377	0.849326599326599	0.977941176470588	0.981915933528837
CHEMBL1737910	0.433779761904762	0.484848484848485	0.518466898954704	0.519345238095238	0.724799010513296	0.664808362369338	0.497023809523809	0.618429189857761	0.559581881533101	0.648809523809524	0.643166357452072	0.644599303135889	0.525297619047619	0.685219542362399	0.568641114982578
CHEMBL2354227	0.712018140589569	0.76865671641791	0.683641975308642	0.77891156462585	0.798900235663786	0.741769547325103	0.790249433106576	0.750981932443048	0.662551440329218	0.854875283446712	0.847604084838963	0.700617283950617	0.760770975056689	0.783974862529458	0.630658436213992
CHEMBL2114930	0.624183006535948	0.35	0.661290322580645	0.437908496732026	0.6	0.693548387096774	0.745098039215686	0.785	0.306451612903226	0.679738562091503	0.645	0.435483870967742	0.647058823529412	0.41	0.17741935483871
CHEMBL1963974	0.58125	0.735753676470588	0.673333333333333	0.620833333333333	0.683823529411765	0.73	0.629166666666667	0.707720588235294	0.616666666666667	0.645833333333333	0.611213235294118	0.63	0.645833333333333	0.712316176470588	0.603333333333333
CHEMBL1738371	0.853896103896104	0.705777777777778	0.782608695652174	0.873376623376623	0.771555555555556	0.748792270531401	0.821428571428571	0.800888888888889	0.735104669887279	0.814935064935065	0.765333333333333	0.747181964573269	0.808441558441558	0.815111111111111	0.77938808373591
CHEMBL1794548	0.870588235294118	0.574955908289242	0.831267217630854	0.920588235294118	0.649029982363316	0.964187327823691	0.8	0.661375661375661	0.928374655647383	0.811764705882353	0.698412698412698	0.729338842975207	0.85	0.693121693121693	0.933884297520661
CHEMBL1738418	0.858510638297872	0.754850088183421	0.85077288941736	0.951063829787234	0.840094062316284	0.946492271105826	0.928723404255319	0.861258083480306	0.899524375743163	0.90531914893617	0.854791299235744	0.895362663495838	0.939361702127659	0.87419165196943	0.910820451843044
CHEMBL1614218	0.572727272727273	0.615853658536585	0.573891625615764	0.370454545454545	0.502439024390244	0.566502463054187	0.411363636363636	0.54390243902439	0.591133004926108	0.362878787878788	0.541463414634146	0.509852216748768	0.447727272727273	0.6	0.578817733990148
CHEMBL1963969	0.488484848484848	0.517156862745098	0.728877005347594	0.482424242424242	0.595833333333333	0.715508021390374	0.602424242424242	0.487990196078431	0.601069518716578	0.442424242424242	0.543872549019608	0.687700534759358	0.67030303030303	0.565441176470588	0.638502673796791
CHEMBL1243967	0.692872117400419	0.713709677419355	0.954545454545455	0.662473794549266	0.82258064516129	0.954545454545455	0.610062893081761	0.705645161290323	0.954545454545455	0.674528301886792	0.75	1	0.610062893081761	0.69758064516129	0.954545454545455
CHEMBL1614528	0.578947368421053	0.56	0.554298642533937	0.701973684210526	0.696296296296296	0.619909502262443	0.678289473684211	0.724444444444445	0.585972850678733	0.601315789473684	0.713333333333333	0.547511312217195	0.675657894736842	0.677037037037037	0.617647058823529
CHEMBL1613981	0.602628285356696	0.626134301270417	0.680459770114943	0.730913642052566	0.724742891712039	0.793103448275862	0.672715894868586	0.714458560193587	0.741379310344828	0.693366708385482	0.733212341197822	0.735632183908046	0.668335419274093	0.728977616454931	0.727586206896552
CHEMBL2114814	0.42972972972973	0.591090018371096	0.537135278514589	0.535810810810811	0.778628291488059	0.645888594164456	0.465540540540541	0.687078995713411	0.497347480106101	0.606081081081081	0.694427434170239	0.594164456233422	0.493918918918919	0.653398652786283	0.643236074270557
CHEMBL1964112	0.391764705882353	0.425	0.492307692307692	0.371764705882353	0.490740740740741	0.624358974358974	0.411764705882353	0.486111111111111	0.642307692307692	0.389411764705882	0.608333333333333	0.630769230769231	0.428235294117647	0.475	0.616666666666667
CHEMBL1963846	0.426900584795322	0.541666666666667	0.567540322580645	0.744639376218324	0.527173913043478	0.707661290322581	0.610136452241715	0.670289855072464	0.659274193548387	0.47953216374269	0.701086956521739	0.494959677419355	0.727095516569201	0.733695652173913	0.683467741935484
CHEMBL1963744	0.560310612597066	0.750292397660819	0.761723009814613	0.655565142364107	0.788011695906433	0.702835332606325	0.573943054357204	0.775438596491228	0.754089422028353	0.611216566005177	0.769883040935673	0.718920392584515	0.651768766177739	0.780409356725146	0.794711014176663
CHEMBL2114728	0.245762711864407	0.547568710359408	0.413255360623782	0.491525423728814	0.503171247357294	0.401559454191033	0.686440677966102	0.478858350951374	0.426900584795322	0.220338983050847	0.452431289640592	0.393762183235867	0.355932203389831	0.472515856236786	0.432748538011696
CHEMBL1613817	0.60337552742616	0.531347962382445	0.764880952380952	0.641350210970464	0.724137931034483	0.854166666666667	0.685232067510548	0.688087774294671	0.81547619047619	0.644725738396625	0.804075235109718	0.761904761904762	0.708860759493671	0.706896551724138	0.8125
CHEMBL1738325	0.891566265060241	0.596875	0.849056603773585	0.506024096385542	0.85625	0.962264150943396	0.650602409638554	0.775	0.79874213836478	0.313253012048193	0.9375	0.830188679245283	0.674698795180723	0.91875	0.805031446540881
CHEMBL1614311	0.680803571428572	0.914053426248548	0.862962962962963	0.8125	0.882694541231127	0.788888888888889	0.790178571428572	0.897793263646922	0.67037037037037	0.770089285714286	0.85191637630662	0.735493827160494	0.785714285714286	0.8931475029036	0.712962962962963
CHEMBL3215116	0.454702329594478	0.343076923076923	0.598958333333333	0.361518550474547	0.457435897435897	0.600694444444444	0.411561691113028	0.354871794871795	0.453125	0.534943917169974	0.576923076923077	0.496527777777778	0.445211389128559	0.393846153846154	0.46875
CHEMBL2354276	0.572340425531915	0.596673596673597	0.504615384615385	0.591489361702128	0.730769230769231	0.673230769230769	0.617021276595745	0.731288981288981	0.718153846153846	0.706382978723404	0.736486486486487	0.689846153846154	0.676595744680851	0.718814968814969	0.741538461538461
CHEMBL1614320	0.599706744868035	0.640096618357488	0.5828173374613	0.748900293255132	0.68142780461621	0.602167182662539	0.663489736070381	0.668276972624799	0.61171310629515	0.684017595307918	0.661567364465915	0.568498452012384	0.688782991202346	0.694847020933977	0.602683178534572
CHEMBL1794566	0.44140625	0.835820895522388	0.417840375586854	0.533854166666667	0.626865671641791	0.359154929577465	0.669270833333333	0.402985074626866	0.546948356807512	0.768229166666667	0.776119402985075	0.604460093896714	0.5390625	0.477611940298507	0.612676056338028
CHEMBL1794508	0.487179487179487	0.519117647058823	0.553030303030303	0.618589743589744	0.605882352941177	1	0.676282051282051	0.758823529411765	0.96969696969697	0.657051282051282	0.701470588235294	1	0.826923076923077	0.613235294117647	0.984848484848485
CHEMBL1964111	0.545727136431784	0.792083333333333	0.668571428571429	0.754122938530735	0.789583333333333	0.698503401360544	0.695652173913044	0.773333333333333	0.651972789115646	0.726386806596702	0.750416666666667	0.66734693877551	0.682908545727136	0.742083333333333	0.644625850340136
CHEMBL1738497	0.796969696969697	0.897165991902834	0.660450387051372	0.926868686868687	0.973279352226721	0.841660802251935	0.912727272727273	0.965182186234818	0.800844475721323	0.917171717171717	0.930364372469636	0.849401829697396	0.91959595959596	0.954655870445344	0.788177339901478
CHEMBL1614515	0.530976220275344	0.668421052631579	0.420138888888889	0.602628285356696	0.905263157894737	0.482638888888889	0.384230287859825	0.884210526315789	0.416666666666667	0.622027534418022	0.815789473684211	0.524305555555556	0.345431789737171	0.952631578947368	0.413194444444444
CHEMBL1794356	0.826646090534979	0.64083820662768	0.7291280148423	0.75	0.706140350877193	0.730055658627087	0.817901234567901	0.679824561403509	0.791280148423006	0.72119341563786	0.693469785575049	0.708719851576994	0.816872427983539	0.715399610136452	0.766233766233766
CHEMBL3214930	0.501446480231437	0.57312091503268	0.527044025157233	0.713114754098361	0.658496732026144	0.715723270440252	0.577145612343298	0.51797385620915	0.571069182389937	0.549662487945998	0.631535947712418	0.747169811320755	0.611861137897782	0.575163398692811	0.59874213836478
CHEMBL1738025	0.561685823754789	0.609362389023406	0.640527950310559	0.808429118773946	0.722356739305892	0.71583850931677	0.583908045977011	0.690072639225182	0.658902691511387	0.704214559386973	0.681194511702986	0.729166666666667	0.698850574712644	0.610169491525424	0.658126293995859
CHEMBL2114771	0.478862973760933	0.489240228370663	0.324571428571429	0.502186588921283	0.507685551163812	0.384	0.550291545189504	0.541062801932367	0.421714285714286	0.58564139941691	0.504611330698287	0.6	0.563411078717201	0.471234079929732	0.443428571428571
CHEMBL1827362	0.974025974025974	0.967521367521367	1	0.978354978354978	0.972649572649573	0.994047619047619	0.974025974025974	0.969230769230769	0.988095238095238	0.887445887445887	0.938461538461538	0.994047619047619	0.982683982683983	0.955555555555555	0.988095238095238
CHEMBL1794578	0.649338805289558	0.767848699763593	0.767756128221245	0.663930688554492	0.806146572104019	0.742300439974859	0.651162790697674	0.718676122931442	0.742928975487115	0.689922480620155	0.762174940898345	0.670647391577624	0.658458732330141	0.781560283687943	0.778755499685732
CHEMBL1794358	0.528169014084507	0.171428571428571	0.809640522875817	0.922535211267606	0.542857142857143	0.588235294117647	0.985915492957746	0.492857142857143	0.223856209150327	1	0.55	0.837418300653595	0.985915492957746	0.614285714285714	0.387254901960784
CHEMBL3214812	0.775438596491228	0.67	0.579450418160096	0.856140350877193	0.685384615384615	0.721027479091995	0.745029239766082	0.553076923076923	0.594982078853047	0.861988304093567	0.705384615384615	0.739545997610514	0.760233918128655	0.651538461538462	0.600358422939068
CHEMBL1614514	0.279560810810811	0.457142857142857	0.325854700854701	0.435810810810811	0.487912087912088	0.358974358974359	0.524493243243243	0.492307692307692	0.455128205128205	0.369087837837838	0.406593406593407	0.438568376068376	0.490709459459459	0.442857142857143	0.507478632478632
CHEMBL1613898	0.840659340659341	0.814241486068112	0.778270509977827	0.912087912087912	0.860681114551084	0.862527716186253	0.799450549450549	0.86687306501548	0.920177383592018	0.865384615384615	0.918472652218782	0.891352549889135	0.862637362637363	0.844169246646027	0.940133037694013
CHEMBL2114857	0.558851674641148	0.639778634915311	0.640070921985816	0.684688995215311	0.644474257923864	0.751266464032421	0.573684210526316	0.574039912795573	0.713779128672746	0.663636363636364	0.596679523729666	0.713272543059777	0.591387559808612	0.70803286936106	0.693009118541033
CHEMBL1738164	0.335526315789474	0.486904761904762	0.370510396975425	0.41593567251462	0.374603174603175	0.557025834908633	0.303362573099415	0.425396825396825	0.466288594833018	0.410087719298246	0.378571428571429	0.420919974795211	0.339181286549708	0.445238095238095	0.412098298676749
CHEMBL3215228	0.667808219178082	0.486075949367089	0.457107843137255	0.688356164383562	0.554430379746835	0.458333333333333	0.559360730593607	0.489873417721519	0.66421568627451	0.562785388127854	0.445569620253165	0.531862745098039	0.649543378995434	0.678481012658228	0.647058823529412
CHEMBL2114811	0.419230769230769	0.402564102564103	0.369281045751634	0.734615384615385	0.58974358974359	0.647058823529412	0.807692307692308	0.664102564102564	0.738562091503268	0.557692307692308	0.664102564102564	0.450980392156863	0.667307692307692	0.530769230769231	0.686274509803922
CHEMBL1737942	0.76669167291823	0.719405003380663	0.672098765432099	0.790697674418605	0.744421906693712	0.745432098765432	0.794448612153038	0.751859364435429	0.736543209876543	0.778694673668417	0.646382691007438	0.70358024691358	0.81245311327832	0.768086544962813	0.737777777777778
CHEMBL3215220	0.642424242424242	0.558189655172414	0.748275862068966	0.753535353535354	0.34051724137931	0.620689655172414	0.52979797979798	0.387931034482759	0.524137931034483	0.644191919191919	0.426724137931034	0.582758620689655	0.581818181818182	0.767241379310345	0.644827586206897
CHEMBL2114899	0.623711340206186	0.63785046728972	0.443298969072165	0.506443298969072	0.435747663551402	0.598510882016037	0.622422680412371	0.581775700934579	0.621993127147766	0.502577319587629	0.474883177570093	0.63717067583047	0.737113402061856	0.549065420560748	0.675830469644903
CHEMBL2354206	0.871004566210046	0.895833333333333	0.857487922705314	0.86986301369863	0.979166666666667	0.961352657004831	0.908675799086758	0.770833333333333	0.864734299516908	0.80365296803653	0.944444444444444	0.944444444444444	0.874429223744292	0.923611111111111	0.886473429951691
CHEMBL1794355	0.17	0.485849056603774	0.533101045296167	0.62	0.566037735849057	0.524390243902439	0.1125	0.6	0.513937282229965	0.5375	0.566037735849057	0.468641114982578	0.1325	0.564150943396226	0.477351916376307
CHEMBL3215092	0.769736842105263	0.776055124892334	0.664415584415584	0.852631578947368	0.840654608096469	0.747012987012987	0.829605263157895	0.803617571059432	0.757922077922078	0.782236842105263	0.75968992248062	0.731688311688312	0.82828947368421	0.772609819121447	0.768831168831169
CHEMBL2114830	0.480882352941176	0.429738562091503	0.589090909090909	0.583333333333333	0.684640522875817	0.781818181818182	0.682352941176471	0.643790849673203	0.630909090909091	0.655392156862745	0.63562091503268	0.512727272727273	0.628921568627451	0.624183006535948	0.565454545454545
CHEMBL1613864	0.526455026455027	0.76530612244898	0.573684210526316	0.69047619047619	0.747448979591837	0.542105263157895	0.814814814814815	0.806122448979592	0.752631578947368	0.685185185185185	0.668367346938776	0.481578947368421	0.756613756613757	0.642857142857143	0.680263157894737
CHEMBL2114764	0.618681318681319	0.684210526315789	0.926773455377574	0.626739926739927	0.841052631578947	0.876430205949657	0.620879120879121	0.78	0.899313501144165	0.605128205128205	0.749473684210526	0.819221967963387	0.629304029304029	0.786315789473684	0.916475972540046
CHEMBL3214851	0.488603988603989	0.505555555555556	0.603329506314581	0.37037037037037	0.584126984126984	0.506314580941447	0.471509971509972	0.494444444444444	0.38691159586682	0.494301994301994	0.642063492063492	0.509758897818599	0.551282051282051	0.580952380952381	0.477611940298508
CHEMBL1614290	0.559178743961353	0.576131687242798	0.373493975903614	0.543478260869565	0.584362139917695	0.41566265060241	0.483091787439614	0.567901234567901	0.457831325301205	0.48792270531401	0.666666666666667	0.843373493975904	0.5	0.411522633744856	0.469879518072289
CHEMBL1964106	0.636734693877551	0.744877049180328	0.714285714285714	0.636054421768708	0.74146174863388	0.658744510462413	0.582993197278912	0.721311475409836	0.639111340738827	0.628571428571429	0.784494535519126	0.583570136915526	0.602040816326531	0.744193989071038	0.619994833376388
CHEMBL1794522	0.565986394557823	0.719791666666667	0.760477111540941	0.591383219954648	0.715104166666667	0.762733720180529	0.601814058956916	0.722395833333333	0.800128949065119	0.646258503401361	0.748958333333333	0.705673758865248	0.585487528344671	0.721875	0.832366215344939
CHEMBL1614344	0.788523706896552	0.658692185007974	0.779448621553885	0.767780172413793	0.825358851674641	0.923558897243108	0.788793103448276	0.832535885167464	0.913533834586466	0.801185344827586	0.800637958532695	0.897869674185464	0.804418103448276	0.841307814992026	0.911654135338346
CHEMBL1243966	0.772619047619048	0.779761904761905	0.935064935064935	0.879166666666667	0.866071428571429	0.896103896103896	0.78452380952381	0.791666666666667	0.87012987012987	0.861904761904762	0.741071428571429	0.779220779220779	0.753571428571429	0.764880952380952	0.974025974025974
CHEMBL1614105	0.634408602150538	0.532407407407407	0.682783018867925	0.821236559139785	0.863425925925926	0.813679245283019	0.717741935483871	0.680555555555556	0.76061320754717	0.795698924731183	0.888888888888889	0.836084905660377	0.688172043010753	0.865740740740741	0.813679245283019
CHEMBL1794573	0.938461538461539	0.77906976744186	0.93030303030303	0.966666666666667	0.821353065539112	0.942424242424242	0.947435897435897	0.834038054968287	0.917171717171717	0.923076923076923	0.801268498942918	0.939393939393939	0.980769230769231	0.852008456659619	0.936363636363636
CHEMBL1614167	0.4921875	0.391236306729264	0.37741935483871	0.5625	0.583724569640063	0.475806451612903	0.2828125	0.456181533646322	0.4	0.4828125	0.510172143974961	0.491935483870968	0.3625	0.543035993740219	0.448387096774194
CHEMBL1738632	0.746268656716418	0.624505928853755	0.572294372294372	0.686567164179104	0.673254281949934	0.648917748917749	0.733475479744136	0.69038208168643	0.746320346320346	0.666311300639659	0.537549407114625	0.574891774891775	0.720682302771855	0.719367588932806	0.748917748917749
CHEMBL1738079	0.306372549019608	0.485714285714286	0.286274509803922	0.343137254901961	0.714285714285714	0.874509803921569	0.45343137254902	0.619047619047619	0.698039215686275	0.406862745098039	0.457142857142857	0.627450980392157	0.406862745098039	0.8	0.411764705882353
CHEMBL2354292	0.515046296296296	0.582065217391304	0.550438596491228	0.628472222222222	0.649728260869565	0.744517543859649	0.646990740740741	0.737228260869565	0.757675438596491	0.736111111111111	0.680706521739131	0.732456140350877	0.733796296296296	0.684510869565217	0.733552631578947
CHEMBL1794567	0.510857142857143	0.65807962529274	0.574566831683168	0.409142857142857	0.716627634660422	0.565594059405941	0.520571428571429	0.622950819672131	0.495668316831683	0.462285714285714	0.724824355971897	0.52289603960396	0.582857142857143	0.608899297423888	0.547029702970297
CHEMBL2114874	0.50402576489533	0.475708502024291	0.652116402116402	0.51610305958132	0.621457489878542	0.743386243386243	0.535426731078905	0.481275303643725	0.712962962962963	0.625603864734299	0.514423076923077	0.723544973544974	0.581320450885668	0.553137651821862	0.728835978835979
CHEMBL2114829	0.711840628507295	0.66522210184182	0.693125	0.772166105499439	0.723726977248104	0.74125	0.789001122334456	0.740520043336945	0.6825	0.757014590347924	0.738894907908992	0.663125	0.759820426487093	0.745395449620802	0.69875
CHEMBL1964115	0.762999452654625	0.772889417360285	0.70093896713615	0.814449917898194	0.791914387633769	0.693192488262911	0.640394088669951	0.758323424494649	0.724178403755869	0.76135741652983	0.779131985731272	0.642605633802817	0.647509578544061	0.795778834720571	0.742253521126761
CHEMBL1614403	0.792582417582418	0.78125	0.820214669051878	0.840659340659341	0.8125	0.894454382826476	0.743131868131868	0.850694444444445	0.829159212880143	0.715659340659341	0.762152777777778	0.915026833631485	0.722527472527473	0.835069444444445	0.809481216457961
CHEMBL1963777	0.792699724517906	0.837671232876712	0.766140602582496	0.860192837465565	0.80513698630137	0.731994261119082	0.71831955922865	0.781849315068493	0.743185078909613	0.836088154269972	0.817808219178082	0.725824964131994	0.765151515151515	0.85513698630137	0.760401721664275
CHEMBL1614310	0.5	0.604575163398693	0.85	0.375	0.676470588235294	0.878571428571429	0.527777777777778	0.666666666666667	0.907142857142857	0.430555555555556	0.591503267973856	0.8	0.569444444444444	0.643790849673203	0.935714285714286
CHEMBL1033994	0.681985294117647	0.728011825572801	0.810763888888889	0.684742647058824	0.832963784183296	0.797743055555555	0.676470588235294	0.699186991869919	0.78125	0.697610294117647	0.728750923872875	0.895833333333333	0.710477941176471	0.682187730968219	0.807291666666667
CHEMBL3215187	0.510928961748634	0.419512195121951	0.507235142118863	0.80327868852459	0.66869918699187	0.74108527131783	0.87431693989071	0.578252032520325	0.757105943152455	0.777322404371585	0.542682926829268	0.693023255813954	0.898907103825137	0.605691056910569	0.741602067183463
CHEMBL1738482	0.885294117647059	0.680232558139535	0.38963963963964	0.908823529411765	0.561310782241015	0.513513513513514	0.5	0.506342494714588	0.711711711711712	0.752941176470588	0.536997885835095	0.490990990990991	0.732352941176471	0.582452431289641	0.752252252252252
CHEMBL1738512	0.653465346534653	0.46605504587156	0.986842105263158	0.68976897689769	0.688073394495413	1	0.745874587458746	0.693577981651376	1	0.574257425742574	0.640366972477064	0.986842105263158	0.788778877887789	0.68256880733945	1
CHEMBL1738253	0.490299823633157	0.627659574468085	0.500485436893204	0.430335097001764	0.34468085106383	0.605825242718447	0.455026455026455	0.421276595744681	0.592233009708738	0.384479717813051	0.61063829787234	0.696116504854369	0.569664902998236	0.48936170212766	0.514563106796116
CHEMBL1963806	0.841099163679809	0.900862068965517	0.762927981109799	0.832138590203106	0.89378078817734	0.749940968122786	0.740740740740741	0.852216748768473	0.769775678866588	0.740740740740741	0.866379310344828	0.681227863046045	0.744922341696535	0.891933497536946	0.758205430932704
CHEMBL1613787	0.643181818181818	0.705715902659875	0.610606060606061	0.631818181818182	0.637238256932654	0.59469696969697	0.552272727272727	0.644029428409734	0.510606060606061	0.661363636363636	0.607809847198642	0.543181818181818	0.60530303030303	0.65704584040747	0.551515151515152
CHEMBL1794320	0.940298507462687	0.860119047619048	1	1	0.946428571428571	0.979674796747967	0.940298507462687	0.952380952380952	1	0.940298507462687	0.80952380952381	0.886178861788618	1	0.952380952380952	1
CHEMBL1964023	0.514338575393155	0.48	0.547593582887701	0.532839962997225	0.572753623188406	0.470588235294118	0.494912118408881	0.527536231884058	0.649197860962567	0.592969472710453	0.669565217391304	0.550802139037433	0.500462534690102	0.549565217391304	0.672727272727273
CHEMBL1794571	0.600357142857143	0.626488095238095	0.697928227894932	0.604285714285714	0.63640873015873	0.678875323714391	0.597857142857143	0.665426587301587	0.679245283018868	0.56	0.61359126984127	0.638919718830928	0.581785714285714	0.658482142857143	0.677395486496485
CHEMBL1738670	0.576719576719577	0.660411622276029	0.388235294117647	0.566137566137566	0.515133171912833	0.53921568627451	0.661375661375661	0.462469733656174	0.592156862745098	0.541005291005291	0.513922518159806	0.541176470588235	0.591269841269841	0.572639225181598	0.513725490196078
CHEMBL1963838	0.552884615384615	0.41474358974359	0.524519230769231	0.520299145299145	0.470512820512821	0.467307692307692	0.556623931623932	0.433333333333333	0.6	0.539529914529915	0.499358974358974	0.431730769230769	0.558760683760684	0.423717948717949	0.570192307692308
CHEMBL1614034	0.06	0.0909090909090909	0.314009661835749	1	0.166666666666667	0.289855072463768	0.78	0.545454545454545	0.42512077294686	0.66	0.121212121212121	0.434782608695652	0.82	0.318181818181818	0.531400966183575
CHEMBL1794365	0.552721088435374	0.558715596330275	0.574305555555556	0.697278911564626	0.602752293577982	0.7125	0.459183673469388	0.479816513761468	0.575	0.693877551020408	0.508256880733945	0.702777777777778	0.571428571428571	0.61743119266055	0.556944444444444
CHEMBL1614001	0.695238095238095	0.640748031496063	0.72972972972973	0.638095238095238	0.688976377952756	0.333333333333333	0.828571428571429	0.492125984251969	0.459459459459459	0.723809523809524	0.55511811023622	0.0180180180180181	0.838095238095238	0.431102362204724	0.216216216216216
CHEMBL1738579	0.660873882820258	0.632777777777778	0.414465408805031	0.606752730883813	0.596666666666667	0.363522012578616	0.614697120158888	0.577777777777778	0.591194968553459	0.53227408142999	0.416666666666667	0.394968553459119	0.647964250248262	0.63	0.449056603773585
CHEMBL1738407	0.785675381263617	0.612050739957717	0.745361231741019	0.908496732026144	0.744362226920366	0.848401105408606	0.837962962962963	0.698907681465821	0.799052506908804	0.893927015250545	0.704369274136716	0.780497433872878	0.872821350762527	0.748062015503876	0.793920252664824
CHEMBL2354256	0.666666666666667	0.539259259259259	0.594178082191781	0.700133868808568	0.615555555555556	0.470034246575342	0.663989290495315	0.608888888888889	0.558504566210046	0.560240963855422	0.48	0.57791095890411	0.65863453815261	0.607407407407407	0.555650684931507
CHEMBL1613941	0.546236559139785	0.466666666666667	0.744416873449132	0.602150537634409	0.555555555555556	0.761786600496278	0.647311827956989	0.548148148148148	0.52605459057072	0.501075268817204	0.609876543209876	0.75682382133995	0.651612903225806	0.565432098765432	0.622828784119107
CHEMBL2354274	0.804545454545455	0.80952380952381	0.882267441860465	0.8	0.789554531490015	0.744186046511628	0.763636363636364	0.886328725038402	0.729651162790698	0.754545454545455	0.864823348694316	0.700581395348837	0.718181818181818	0.645161290322581	0.755813953488372
CHEMBL1963776	0.707865168539326	0.835171568627451	0.726495726495727	0.720973782771536	0.778186274509804	0.77457264957265	0.812734082397004	0.767156862745098	0.568376068376068	0.668539325842697	0.748161764705882	0.759615384615385	0.840823970037453	0.716299019607843	0.695512820512821
CHEMBL1963778	0.614517265680056	0.572557471264368	0.682417229186757	0.738548273431994	0.735632183908046	0.659273545483767	0.738548273431994	0.638290229885057	0.729668916747027	0.815362931642001	0.616738505747126	0.662327225972356	0.766032417195208	0.682830459770115	0.707168113146898
CHEMBL1738642	0.539965986394558	0.564516129032258	0.555185185185185	0.532312925170068	0.550230414746544	0.600740740740741	0.618197278911565	0.630414746543779	0.63037037037037	0.613095238095238	0.661290322580645	0.676296296296296	0.644557823129252	0.646543778801843	0.699259259259259
CHEMBL1614434	0.670377867746289	0.641025641025641	0.650205761316872	0.717948717948718	0.677350427350427	0.689142133586578	0.771592442645074	0.644017094017094	0.699905033238367	0.703272604588394	0.488034188034188	0.675213675213675	0.747975708502024	0.646153846153846	0.740424184868629
CHEMBL1613762	0.834134615384615	0.660968660968661	0.661231884057971	0.754807692307692	0.497150997150997	0.757246376811594	0.538461538461538	0.745014245014245	0.817028985507246	0.379807692307692	0.682336182336182	0.552536231884058	0.552884615384615	0.725071225071225	0.782608695652174
CHEMBL2114761	0.667207792207792	0.62719298245614	0.633333333333333	0.6875	0.64766081871345	0.693693693693694	0.722402597402597	0.683792815371763	0.663063063063063	0.718344155844156	0.737781954887218	0.558558558558559	0.773538961038961	0.691520467836257	0.656756756756757
CHEMBL1613991	0.754084967320261	0.873040752351097	0.680037313432836	0.78921568627451	0.764890282131661	0.770522388059701	0.669934640522876	0.847962382445141	0.694029850746269	0.75	0.774294670846395	0.716417910447761	0.686274509803922	0.838557993730408	0.690298507462687
CHEMBL1614328	0.760141987829615	0.669394435351882	0.728744939271255	0.818965517241379	0.800941080196399	0.748313090418354	0.861561866125761	0.793576104746317	0.826585695006748	0.778904665314402	0.84513093289689	0.690958164642375	0.84685598377282	0.858224222585925	0.781376518218624
CHEMBL1964117	0.676988036593948	0.770085153646798	0.694070399244035	0.79521463757917	0.753054424287301	0.757618710134656	0.710767065446869	0.6401332839689	0.566973777462792	0.749472202674173	0.719733432062199	0.709898417198205	0.7009148486981	0.670122176971492	0.599811008740846
CHEMBL1614104	0.702623906705539	0.551418439716312	0.497560975609756	0.826530612244898	0.75177304964539	0.510975609756098	0.706997084548105	0.462765957446808	0.608536585365854	0.797376093294461	0.774822695035461	0.597560975609756	0.686588921282799	0.50886524822695	0.535365853658537
CHEMBL1964103	0.671612903225806	0.773468057366362	0.744560838033844	0.730322580645161	0.724250325945241	0.695675530486167	0.623870967741936	0.789439374185137	0.682782702121945	0.652903225806452	0.792372881355932	0.561643835616438	0.618064516129032	0.785528031290743	0.667472468439431
CHEMBL2114791	0.358024691358025	0.587912087912088	0.810810810810811	0.475308641975309	0.549450549450549	0.864864864864865	0.509259259259259	0.43956043956044	0.472972972972973	0.555555555555556	0.467032967032967	0.405405405405405	0.493827160493827	0.582417582417582	0.0675675675675676
CHEMBL3215171	0.647590361445783	0.954545454545455	0.263888888888889	0.933734939759036	0.897727272727273	1	0.933734939759036	0.772727272727273	0.958333333333333	0.740963855421687	0.988636363636364	0.986111111111111	0.885542168674699	0.784090909090909	0.923611111111111
CHEMBL1613874	0.715804597701149	0.660608814175375	0.557936507936508	0.791379310344828	0.831440254429805	0.768253968253968	0.778735632183908	0.780554293502953	0.704761904761905	0.808045977011494	0.733303044070877	0.738095238095238	0.762643678160919	0.757383007723762	0.748412698412698
CHEMBL2114719	0.545028142589118	0.527925531914894	0.470408163265306	0.565666041275797	0.530965045592705	0.551020408163265	0.576923076923077	0.611892097264438	0.612244897959184	0.626641651031895	0.551481762917933	0.555102040816327	0.606472795497186	0.532104863221885	0.615646258503401
CHEMBL1738485	0.54887482419128	0.666455696202532	0.723927875243665	0.665260196905767	0.759493670886076	0.828947368421053	0.69971870604782	0.706962025316456	0.759259259259259	0.641350210970464	0.683544303797468	0.642787524366472	0.749648382559775	0.70126582278481	0.807017543859649
CHEMBL1614288	0.625454545454545	0.673267326732673	0.770412457912458	0.834343434343434	0.776874115983027	0.867845117845118	0.793535353535353	0.794554455445544	0.849326599326599	0.81979797979798	0.765558698727016	0.831649831649832	0.79030303030303	0.825318246110325	0.86952861952862
CHEMBL2114748	0.507407407407407	0.64574780058651	0.565789473684211	0.581481481481481	0.702932551319648	0.751461988304094	0.51037037037037	0.664222873900293	0.609649122807018	0.605555555555556	0.647507331378299	0.644736842105263	0.557037037037037	0.686510263929619	0.733918128654971
CHEMBL1738610	0.723243243243243	0.803186907838071	0.773333333333333	0.781081081081081	0.821705426356589	0.803066666666667	0.658378378378378	0.765288544358312	0.739333333333333	0.762162162162162	0.821705426356589	0.765466666666667	0.69945945945946	0.816537467700258	0.7556
CHEMBL3215128	0.5925	0.507042253521127	0.645833333333333	0.68125	0.725352112676056	0.739035087719298	0.79375	0.676056338028169	0.755482456140351	0.76875	0.748239436619718	0.760964912280702	0.76875	0.698943661971831	0.754385964912281
CHEMBL1738611	0.444672131147541	0.511608623548922	0.388695652173913	0.676229508196721	0.588723051409619	0.500869565217391	0.684426229508197	0.69983416252073	0.557391304347826	0.528688524590164	0.560530679933665	0.525217391304348	0.762295081967213	0.565505804311774	0.659130434782609
CHEMBL1614247	0.498333333333333	0.561188811188811	0.598181818181818	0.72625	0.697302697302697	0.726868686868687	0.610416666666667	0.654095904095904	0.65010101010101	0.585	0.646853146853147	0.684040404040404	0.583333333333333	0.665834165834166	0.653333333333333
CHEMBL1614314	0.65	0.790476190476191	0.695921985815603	0.694444444444444	0.75	0.852836879432624	0.727777777777778	0.678571428571428	0.74290780141844	0.416666666666667	0.742857142857143	0.877659574468085	0.641666666666667	0.84047619047619	0.835106382978723
CHEMBL3215185	0.748484848484849	0.587792642140468	0.598455598455598	0.730735930735931	0.777591973244147	0.694980694980695	0.793939393939394	0.609253065774805	0.714285714285714	0.770562770562771	0.746376811594203	0.674388674388674	0.813852813852814	0.777034559643255	0.693693693693694
CHEMBL1963799	0.844098883572568	0.834745762711864	0.792788461538462	0.891945773524721	0.862817796610169	0.792548076923077	0.841307814992025	0.820709745762712	0.828725961538461	0.905901116427432	0.841896186440678	0.818629807692308	0.840909090909091	0.833156779661017	0.795432692307692
CHEMBL1794475	0.701465201465201	0.75	0.778924327704815	0.767857142857143	0.865575396825397	0.800500312695435	0.789377289377289	0.771825396825397	0.765478424015009	0.756868131868132	0.849702380952381	0.726704190118824	0.782967032967033	0.825396825396825	0.801125703564728
CHEMBL1614549	0.583529411764706	0.53001968503937	0.612365591397849	0.829803921568627	0.592765748031496	0.436559139784946	0.682352941176471	0.583907480314961	0.608602150537634	0.780392156862745	0.644438976377953	0.561290322580645	0.690196078431373	0.662155511811024	0.473118279569892
CHEMBL1738171	0.659313725490196	0.779053084648494	0.816258919469929	0.808823529411765	0.883787661406026	0.569826707441386	0.717647058823529	0.873027259684362	0.738532110091743	0.817156862745098	0.823529411764706	0.574923547400612	0.770588235294118	0.837159253945481	0.738532110091743
CHEMBL1794387	0.559803921568627	0.780514504652436	0.783666666666667	0.624019607843137	0.774493705528188	0.766	0.636274509803922	0.762452107279693	0.790666666666667	0.66421568627451	0.755883962780515	0.710333333333333	0.668627450980392	0.790914066776136	0.826
CHEMBL1794516	0.636363636363636	0.695035460992908	0.775	0.785123966942149	0.875886524822695	0.8075	0.776859504132231	0.885342789598109	0.6825	0.599173553719008	0.777777777777778	0.825	0.884297520661157	0.867612293144208	0.7475
CHEMBL1614091	0.360655737704918	0.365168539325843	0.738636363636364	0.352459016393443	0.696629213483146	0.795454545454545	0.718579234972678	0.702247191011236	0.727272727272727	0.693989071038251	0.567415730337079	0.863636363636364	0.707650273224044	0.792134831460674	0.5
CHEMBL1963937	0.876190476190476	0.863082437275986	0.880952380952381	0.922305764411028	0.91326164874552	0.935267857142857	0.841604010025063	0.913620071684588	0.912202380952381	0.919799498746867	0.893189964157706	0.9375	0.877694235588972	0.904301075268817	0.912202380952381
CHEMBL1614385	0.5	0.553703703703704	0.792483660130719	0.656982193064667	0.409259259259259	0.663398692810457	0.719775070290534	0.663888888888889	0.849673202614379	0.641986879100281	0.513888888888889	0.722222222222222	0.770384254920337	0.573148148148148	0.895424836601307
CHEMBL1963692	0.741798941798942	0.825	0.733637747336378	0.725396825396825	0.791208791208791	0.683916793505835	0.703703703703704	0.789010989010989	0.684424150177575	0.686772486772487	0.837087912087912	0.610730593607306	0.71005291005291	0.816483516483517	0.694063926940639
CHEMBL1614086	0.260869565217391	0.0681818181818182	0.321428571428571	0.652173913043478	0.363636363636364	0.238095238095238	0.41304347826087	0.272727272727273	0.404761904761905	0.782608695652174	0.386363636363636	0.416666666666667	0.326086956521739	0.590909090909091	0.464285714285714
CHEMBL1963831	0.709338280766852	0.799392712550607	0.680324074074074	0.755102040816326	0.830566801619433	0.790509259259259	0.726963512677798	0.7582995951417	0.699537037037037	0.803339517625232	0.737246963562753	0.740625	0.730674087816945	0.759514170040486	0.724537037037037
CHEMBL1614016	0.561864406779661	0.43695652173913	0.361359570661896	0.525423728813559	0.483695652173913	0.612701252236136	0.583050847457627	0.635869565217391	0.611806797853309	0.557627118644068	0.522826086956522	0.584973166368515	0.649152542372881	0.704347826086957	0.648479427549195
CHEMBL1963758	0.664516129032258	0.682847896440129	0.712301587301587	0.713978494623656	0.655879180151025	0.75515873015873	0.726164874551971	0.635382955771305	0.794047619047619	0.670967741935484	0.690938511326861	0.756944444444444	0.698207885304659	0.735167206040992	0.831746031746032
CHEMBL2114737	0.682648401826484	0.629213483146068	0.646236559139785	0.833333333333333	0.808124459809853	0.746236559139785	0.784246575342466	0.772687986171132	0.819354838709677	0.770547945205479	0.749351771823682	0.712903225806452	0.808219178082192	0.853932584269663	0.779569892473118
CHEMBL1963803	0.677884615384615	0.647849462365591	0.843229166666667	0.738199300699301	0.811827956989247	0.871875	0.786276223776224	0.625	0.854166666666667	0.763548951048951	0.792338709677419	0.872395833333333	0.795454545454546	0.655913978494624	0.88125
CHEMBL2354269	0.726262626262626	0.632352941176471	0.615301724137931	0.873737373737374	0.672794117647059	0.664511494252873	0.81010101010101	0.781985294117647	0.771551724137931	0.796969696969697	0.704779411764706	0.726293103448276	0.883838383838384	0.627941176470588	0.808189655172414
CHEMBL3215112	0.652287581699346	0.942222222222222	0.65	0.820915032679739	0.946666666666667	0.566666666666667	0.674509803921569	0.908888888888889	0.626666666666667	0.747712418300654	0.828888888888889	0.486666666666667	0.712418300653595	0.855555555555556	0.68
CHEMBL3215096	0.617909048288795	0.578143360752056	0.734078590785908	0.670886075949367	0.54524089306698	0.77269647696477	0.649789029535865	0.588719153936545	0.744918699186992	0.637130801687764	0.522130826478653	0.732384823848239	0.709798406000938	0.558558558558559	0.773035230352304
CHEMBL1963687	0.643665158371041	0.714285714285714	0.646856158484065	0.698529411764706	0.806526806526807	0.667527993109388	0.660633484162896	0.725607725607726	0.606373815676141	0.692307692307692	0.747585747585748	0.627763422337066	0.651018099547511	0.786546786546787	0.633936261843239
CHEMBL1614423	0.75019040365575	0.778315154009741	0.647127329192547	0.888994668697639	0.888660218151883	0.813405797101449	0.758377760853008	0.807161967483021	0.813405797101449	0.817212490479817	0.902586266035535	0.768892339544514	0.768469154607769	0.829320161898882	0.82712215320911
CHEMBL1963689	0.651056910569106	0.686497326203209	0.518181818181818	0.703739837398374	0.707887700534759	0.617575757575758	0.670243902439024	0.705213903743315	0.587878787878788	0.638373983739837	0.722593582887701	0.61030303030303	0.755772357723577	0.783422459893048	0.629090909090909
CHEMBL1794410	0.792784163473819	0.682611506140918	0.725	0.893997445721584	0.779357897004956	0.847222222222222	0.769795657726692	0.66537384184443	0.749652777777778	0.841634738186462	0.789485024779142	0.815625	0.772988505747126	0.664511958629606	0.748958333333333
CHEMBL1613928	0.594147005444646	0.673063973063973	0.627003205128205	0.617740471869329	0.672727272727273	0.543669871794872	0.56964609800363	0.664983164983165	0.518429487179487	0.600045372050817	0.642424242424242	0.546875	0.641787658802178	0.646464646464647	0.524839743589744
CHEMBL2114850	0.744341563786008	0.491935483870968	0.572649572649573	0.811728395061728	0.741935483870968	0.567765567765568	0.704732510288066	0.717741935483871	0.590964590964591	0.708847736625514	0.825268817204301	0.697191697191697	0.801440329218107	0.655913978494624	0.703296703296703
CHEMBL1963721	0.674036281179138	0.649671052631579	0.710549450549451	0.670634920634921	0.618421052631579	0.694505494505494	0.587868480725624	0.548793859649123	0.674945054945055	0.656462585034014	0.597450657894737	0.615054945054945	0.566893424036281	0.556469298245614	0.717362637362637
CHEMBL1964000	0.727717391304348	0.632980288320094	0.66490237591155	0.735869565217391	0.717858193586349	0.750411667842861	0.734782608695652	0.736687260959106	0.740061162079511	0.72445652173913	0.698146513680494	0.634674194307222	0.744565217391304	0.72609591056193	0.74217831098565
CHEMBL1614202	0.409285714285714	0.383246527777778	0.521541950113379	0.355714285714286	0.645833333333333	0.600907029478458	0.402857142857143	0.5859375	0.535147392290249	0.575714285714286	0.590277777777778	0.73015873015873	0.411428571428571	0.434895833333333	0.684807256235828
CHEMBL2028073	0.748473748473748	0.600373482726424	0.780555555555556	0.74969474969475	0.842203548085901	0.878703703703704	0.804639804639805	0.813258636788048	0.888888888888889	0.654456654456655	0.802987861811391	0.807407407407407	0.819291819291819	0.826330532212885	0.877777777777778
CHEMBL2114825	0.487639553429027	0.452922077922078	0.486062717770035	0.545454545454545	0.728896103896104	0.443089430894309	0.645135566188198	0.547077922077922	0.528164924506388	0.590111642743222	0.609577922077922	0.475609756097561	0.728867623604466	0.620941558441558	0.426538908246225
CHEMBL3215013	0.516917293233083	0.526315789473684	0.630124777183601	0.716791979949875	0.587003222341568	0.727272727272727	0.557644110275689	0.667561761546724	0.680035650623886	0.539473684210526	0.593984962406015	0.532976827094474	0.585213032581454	0.548872180451128	0.716577540106952
CHEMBL1794413	0.768611670020121	0.801120448179272	0.838931955211025	0.759557344064386	0.830065359477124	0.968130921619294	0.808853118712274	0.779178338001867	0.980189491817399	0.701207243460765	0.824463118580766	0.919035314384152	0.802816901408451	0.887955182072829	0.978466838931955
CHEMBL2114858	0.568921232876712	0.563786008230453	0.576230076230076	0.610659246575343	0.570546737213404	0.584546084546084	0.578981164383562	0.531599059376837	0.52979902979903	0.61451198630137	0.527042915931805	0.586105336105336	0.596104452054795	0.489271017048795	0.595634095634096
CHEMBL1738402	0.812525252525252	0.893418201516793	0.845258999122037	0.811313131313131	0.885698808234019	0.881913959613696	0.768080808080808	0.842091007583965	0.843064091308165	0.793131313131313	0.848185265438787	0.825724319578578	0.798383838383838	0.90249187432286	0.86062335381914
CHEMBL2114852	0.207079646017699	0.32265625	0.379545454545455	0.408849557522124	0.4734375	0.245454545454545	0.284955752212389	0.2859375	0.238636363636364	0.338053097345133	0.384375	0.525	0.316814159292035	0.390625	0.2625
CHEMBL2114753	0.548538011695906	0.5625	0.682985553772071	0.667836257309941	0.707792207792208	0.845906902086677	0.642105263157895	0.729707792207792	0.63884430176565	0.746198830409357	0.719967532467532	0.871589085072231	0.63625730994152	0.693993506493507	0.613162118780096
CHEMBL1246088	0.506875	0.821428571428571	0.596354166666667	0.567708333333333	0.821428571428571	0.656684027777778	0.585	0.892857142857143	0.682291666666667	0.693958333333333	0.892857142857143	0.653211805555556	0.616041666666667	0.821428571428571	0.680121527777778
CHEMBL1613884	0.521543560606061	0.589984143763214	0.572629051620648	0.671875	0.658694503171247	0.661464585834334	0.712121212121212	0.6553911205074	0.60984393757503	0.656723484848485	0.695295983086681	0.630452180872349	0.69436553030303	0.630021141649049	0.591836734693878
CHEMBL1614084	0.574652777777778	0.565417256011315	0.621222527472527	0.644675925925926	0.721357850070721	0.660027472527473	0.769097222222222	0.603960396039604	0.708791208791209	0.679398148148148	0.671852899575672	0.646291208791209	0.733796296296296	0.629420084865629	0.671703296703297
CHEMBL1963717	0.874721780604134	0.806526315789474	0.780402350813743	0.836883942766296	0.877263157894737	0.816568716094033	0.837201907790143	0.798947368421053	0.810578661844485	0.784631690514043	0.818736842105263	0.76751808318264	0.842925278219396	0.851894736842105	0.813517179023508
CHEMBL1613807	0.493069306930693	0.508730158730159	0.796296296296296	0.681188118811881	0.711111111111111	0.736111111111111	0.699009900990099	0.76984126984127	0.761574074074074	0.574257425742574	0.787301587301587	0.587962962962963	0.675247524752475	0.646031746031746	0.733796296296296
CHEMBL1964096	0.635	0.792140385565991	0.690577651515151	0.7525	0.824518042511122	0.813920454545455	0.69	0.874938210578349	0.84469696969697	0.740833333333333	0.855659911023233	0.722064393939394	0.720833333333333	0.880375679683638	0.842329545454545
CHEMBL1964108	0.774928774928775	0.828282828282828	0.734876543209876	0.769230769230769	0.850427350427351	0.704320987654321	0.596153846153846	0.77972027972028	0.703086419753086	0.6502849002849	0.794483294483295	0.628395061728395	0.605413105413105	0.826340326340326	0.709259259259259
CHEMBL1963893	0.772197669746886	0.686076772934288	0.791974548440066	0.853354760948172	0.743656473649967	0.850574712643678	0.724387304138208	0.679245283018868	0.717775041050903	0.801526717557252	0.741704619388419	0.795155993431855	0.726797910807553	0.735198438516591	0.748152709359606
CHEMBL1613867	0.432692307692308	0.506	0.477272727272727	0.442307692307692	0.314666666666667	0.686363636363636	0.490384615384615	0.524	0.581818181818182	0.399038461538462	0.598666666666667	0.440909090909091	0.466346153846154	0.449333333333333	0.513636363636364
CHEMBL2114842	0.869708994708995	0.859465737514518	0.825017088174983	0.946759259259259	0.948606271777004	0.865003417634997	0.877314814814815	0.8931475029036	0.846548188653452	0.84457671957672	0.901858304297329	0.849965823650034	0.904100529100529	0.920441347270615	0.863294600136705
CHEMBL1614069	0.424476650563607	0.392684108527132	0.613293650793651	0.53268921095008	0.563468992248062	0.620039682539683	0.525925925925926	0.569282945736434	0.686309523809524	0.569887278582931	0.594718992248062	0.642460317460318	0.501449275362319	0.587209302325581	0.668849206349206
CHEMBL3215277	0.876466644317801	0.761294261294261	0.934299516908213	0.951055983908817	0.793243793243793	0.953864734299517	0.919544083137781	0.82010582010582	0.964251207729469	0.878310425745893	0.828652828652829	0.929951690821256	0.929601072745558	0.859177859177859	0.972463768115942
CHEMBL2028074	0.936026936026936	0.676363636363636	0.934389140271493	0.906565656565657	0.79030303030303	0.962669683257918	0.788720538720539	0.726060606060606	0.927601809954751	0.867845117845118	0.763636363636364	0.942307692307692	0.7996632996633	0.784242424242424	0.952488687782805
CHEMBL1614301	0.574275362318841	0.697956577266922	0.506944444444444	0.646739130434783	0.628991060025543	0.603009259259259	0.679347826086957	0.655172413793103	0.677083333333333	0.458333333333333	0.60919540229885	0.550925925925926	0.603260869565217	0.646232439335888	0.619212962962963
CHEMBL2354289	0.532281205164993	0.516734279918864	0.571705426356589	0.660688665710186	0.616053317878876	0.693244739756368	0.58428981348637	0.580266589394378	0.699889258028793	0.543041606886657	0.605549116198204	0.681755260243632	0.571736011477762	0.604752245725877	0.670542635658915
CHEMBL3215288	0.598719475878499	0.612564322469983	0.538352272727273	0.625670041691483	0.675385934819897	0.61038961038961	0.592912447885646	0.640008576329331	0.573051948051948	0.60445205479452	0.685891938250429	0.560876623376623	0.585467540202501	0.666166380789022	0.634334415584416
CHEMBL1794494	0.484848484848485	0.476953125	0.276041666666667	0.465909090909091	0.23046875	0.2734375	0.616161616161616	0.303125	0.6015625	0.558080808080808	0.5484375	0.479166666666667	0.508838383838384	0.30234375	0.723958333333333
CHEMBL2114909	0.760814249363868	0.610552763819096	0.82	0.793893129770992	0.717336683417085	0.32	0.597964376590331	0.797738693467337	0.792	0.440203562340967	0.733668341708543	0.472	0.461832061068702	0.827889447236181	0.748
CHEMBL1963805	0.783008658008658	0.680733310273262	0.691005291005291	0.819264069264069	0.771013490141819	0.627248677248677	0.764069264069264	0.665859564164649	0.694708994708995	0.83008658008658	0.710826703562781	0.653703703703704	0.713203463203463	0.711864406779661	0.734656084656085
CHEMBL1794327	0.540780141843972	0.526221264367816	0.572727272727273	0.66903073286052	0.658405172413793	0.410743801652893	0.613475177304965	0.526939655172414	0.430578512396694	0.673758865248227	0.586206896551724	0.5	0.625886524822695	0.626795977011494	0.420661157024793
CHEMBL1738408	0.582159624413146	0.45578231292517	0.604166666666667	0.529342723004695	0.0136054421768707	0.50625	0.531103286384977	0.054421768707483	0.491666666666667	0.552816901408451	0.292517006802721	0.685416666666667	0.535798122065728	0.700680272108844	0.466666666666667
CHEMBL1963947	0.78062015503876	0.700716845878136	0.693952033368092	0.92015503875969	0.846774193548387	0.83733055265902	0.927906976744186	0.871863799283154	0.787799791449426	0.844186046511628	0.850358422939068	0.873826903023983	0.944961240310078	0.801075268817204	0.776850886339937
CHEMBL1963797	0.733608673205989	0.745286576168929	0.717523056653491	0.759938048528653	0.806938159879336	0.803425559947299	0.838926174496644	0.754524886877828	0.776811594202899	0.732576148683531	0.726904223227753	0.703030303030303	0.810273618998451	0.820701357466063	0.795520421607378
CHEMBL1963770	0.749674479166667	0.758689839572192	0.867549668874172	0.780924479166667	0.772058823529412	0.720435193945128	0.773111979166667	0.81216577540107	0.841532639545885	0.758951822916667	0.725935828877005	0.751419110690634	0.773111979166667	0.780080213903743	0.835383159886471
CHEMBL1963811	0.551912568306011	0.695564516129032	0.802356902356902	0.62173649058895	0.626008064516129	0.75016835016835	0.59077109896782	0.597110215053763	0.656565656565657	0.670916818457802	0.651209677419355	0.597138047138047	0.581663630843959	0.586693548387097	0.657912457912458
CHEMBL2114725	0.530769230769231	0.444444444444444	0.55657962109575	0.50506993006993	0.472323232323232	0.470558115719406	0.515384615384615	0.488686868686869	0.540194572452637	0.447727272727273	0.502424242424242	0.529057859703021	0.502797202797203	0.449090909090909	0.512544802867384
CHEMBL3214830	0.764643613267466	0.713383838383838	0.668888888888889	0.817925194071983	0.753787878787879	0.762222222222222	0.799576570218772	0.785353535353535	0.786111111111111	0.791637261820748	0.619949494949495	0.755555555555556	0.827805222300635	0.765151515151515	0.788333333333333
CHEMBL1614359	0.664787976382179	0.605045710267229	0.600329439952082	0.693505099302201	0.737517580872011	0.705600479185385	0.675791733762748	0.662447257383966	0.694219826295298	0.714170692431562	0.735407876230661	0.619047619047619	0.659688674181428	0.688466947960619	0.681641209943097
CHEMBL2114882	0.747747747747748	0.945674044265594	0.706896551724138	0.952497952497952	0.887826961770624	0.850574712643678	0.972972972972973	0.983400402414487	0.781609195402299	0.907862407862408	0.977867203219316	0.867816091954023	0.973791973791974	0.97887323943662	0.877873563218391
CHEMBL3215025	0.67565011820331	0.621794871794872	0.748125	0.774468085106383	0.689636752136752	0.77	0.779669030732861	0.587606837606838	0.66375	0.661465721040189	0.567307692307692	0.676875	0.726713947990544	0.691239316239316	0.686875
CHEMBL1614128	0.568324480927088	0.441592920353982	0.389408099688474	0.599710284886528	0.590265486725664	0.464693665628245	0.628198937711251	0.553097345132743	0.568535825545171	0.521004345726702	0.582743362831858	0.634994807892004	0.617093191694833	0.515929203539823	0.624610591900311
CHEMBL3214992	0.757049692293561	0.702362637362637	0.75765306122449	0.849040139616056	0.763956043956044	0.820078031212485	0.770230550197483	0.763076923076923	0.737545018007203	0.794984844309727	0.72978021978022	0.712334933973589	0.782355102415725	0.750769230769231	0.754651860744298
CHEMBL1614185	0.64176245210728	0.697811945594323	0.604328523862375	0.825287356321839	0.717031342400946	0.668146503884573	0.680842911877395	0.713187463039621	0.652608213096559	0.722605363984674	0.720579538734477	0.659128745837958	0.721455938697318	0.776759314015375	0.652330743618202
CHEMBL2028075	0.821750321750322	0.756756756756757	0.908284023668639	0.788288288288288	0.796332046332046	0.895463510848126	0.760617760617761	0.783783783783784	0.946745562130177	0.790862290862291	0.752895752895753	0.911242603550296	0.73037323037323	0.81949806949807	0.931952662721894
CHEMBL1963789	0.732869910625621	0.7703125	0.791395348837209	0.819761668321748	0.76875	0.724186046511628	0.755461767626614	0.695703125	0.716976744186047	0.761916583912612	0.77578125	0.690348837209302	0.751489572989076	0.7421875	0.694651162790698
CHEMBL1217000	0.86437908496732	0.913461538461538	0.858070500927644	0.837581699346405	0.87531017369727	0.859616573902288	0.735947712418301	0.864764267990074	0.850340136054422	0.669607843137255	0.681141439205955	0.746753246753247	0.78202614379085	0.794665012406948	0.869511440940012
CHEMBL1963971	0.466845878136201	0.609090909090909	0.565714285714286	0.532706093189964	0.494405594405594	0.561904761904762	0.442652329749104	0.416783216783217	0.658095238095238	0.48073476702509	0.488811188811189	0.647142857142857	0.381272401433692	0.416783216783217	0.693333333333333
CHEMBL1738673	0.511160714285714	0.579387626262626	0.588983050847458	0.496811224489796	0.640782828282828	0.572563559322034	0.538265306122449	0.578598484848485	0.614406779661017	0.482142857142857	0.63604797979798	0.548199152542373	0.516581632653061	0.61300505050505	0.67478813559322
CHEMBL1614336	0.715510718789407	0.707402812241522	0.693188241944601	0.819167717528373	0.792700578990902	0.855850763143019	0.778814627994956	0.748449131513648	0.765404183154324	0.782093316519546	0.741832092638544	0.806953080836631	0.814627994955864	0.741832092638544	0.789711701526286
CHEMBL2114872	0.456545654565457	0.547902869757174	0.57	0.720572057205721	0.63046357615894	0.734615384615384	0.74037403740374	0.571302428256071	0.726923076923077	0.688668866886689	0.640176600441501	0.759230769230769	0.739273927392739	0.516997792494481	0.727692307692308
CHEMBL1614276	0.527083333333333	0.647395224578394	0.634704968944099	0.616815476190476	0.631407580564368	0.666304347826087	0.556696428571429	0.651193855401569	0.666614906832298	0.573809523809524	0.623935548505594	0.657065217391304	0.56875	0.621222240774754	0.686490683229814
CHEMBL2028077	0.810897435897436	0.54375	0.888888888888889	0.769230769230769	0.891666666666667	0.871794871794872	0.955128205128205	0.85625	0.837606837606838	0.580128205128205	0.775	0.602564102564103	0.791666666666667	0.791666666666667	0.769230769230769
CHEMBL1963752	0.868011149368749	0.809757236227824	0.808235867446394	0.889326119035908	0.832399626517274	0.865253411306043	0.868339071979013	0.781746031746032	0.864887914230019	0.868011149368749	0.800303454715219	0.858430799220273	0.843990818166913	0.83718487394958	0.883528265107212
CHEMBL1614098	0.503623188405797	0.482142857142857	0.646043165467626	0.496376811594203	0.526785714285714	0.598561151079137	0.626811594202899	0.645089285714286	0.648920863309353	0.742753623188406	0.412946428571429	0.641726618705036	0.634057971014493	0.785714285714286	0.62589928057554
CHEMBL1963686	0.770948012232416	0.710218168371749	0.68042328042328	0.738430173292559	0.759768273141871	0.773544973544974	0.762691131498471	0.773080241587575	0.702222222222222	0.748623853211009	0.754344878589918	0.758888888888889	0.774617737003058	0.835202761000863	0.713333333333333
CHEMBL1963716	0.624553571428571	0.62932369643779	0.674249317561419	0.691964285714286	0.741352607124419	0.77115559599636	0.825446428571429	0.775942178626742	0.697452229299363	0.816964285714286	0.781104801239029	0.789808917197452	0.823214285714286	0.753742901393908	0.733393994540491
CHEMBL1794396	0.523952095808383	0.453254437869823	0.428691275167785	0.573994867408041	0.43905325443787	0.380872483221476	0.523524379811805	0.610650887573964	0.585151006711409	0.553892215568862	0.429585798816568	0.453020134228188	0.600513259195894	0.533727810650888	0.443791946308725
CHEMBL2028076	0.934375	0.771645021645022	0.848484848484848	0.8640625	0.884199134199134	0.893280632411067	0.8546875	0.87012987012987	0.928853754940711	0.753125	0.801948051948052	0.851119894598155	0.821875	0.876623376623377	0.949934123847167
CHEMBL1963702	0.770986920332937	0.86560259079343	0.751700680272109	0.777170035671819	0.900994679620634	0.77334570191713	0.818549346016647	0.851723340272959	0.802102659245516	0.785493460166468	0.910710154984964	0.819418676561534	0.8	0.910016192458941	0.804267161410019
CHEMBL1963916	0.537019230769231	0.587235915492958	0.505047797730725	0.546754807692308	0.563512323943662	0.556329849012776	0.502884615384615	0.58868838028169	0.505137139283481	0.479447115384615	0.53006161971831	0.51429464844099	0.511418269230769	0.615713028169014	0.52765121057804
CHEMBL1614304	0.615363050182226	0.718023255813953	0.721900700578739	0.740678441267171	0.926162790697674	0.804751751446847	0.728343145500421	0.874127906976744	0.746268656716418	0.709559854219232	0.877906976744186	0.79013097776424	0.742360527053546	0.894186046511628	0.753274444106001
CHEMBL3215157	0.647707231040564	0.673513986013986	0.650636942675159	0.835978835978836	0.726398601398601	0.715923566878981	0.815696649029982	0.732954545454545	0.698726114649681	0.703703703703704	0.743881118881119	0.680254777070064	0.736331569664903	0.744755244755245	0.732484076433121
CHEMBL1614466	0.619918699186992	0.536832061068702	0.659180235822572	0.640243902439024	0.672519083969466	0.568781583380124	0.636856368563686	0.575381679389313	0.542953396967995	0.680894308943089	0.74236641221374	0.722627737226277	0.633468834688347	0.615267175572519	0.563728242560359
CHEMBL1794336	0.648813146682897	0.517777777777778	0.660869565217391	0.72195171434368	0.716212121212121	0.761556064073226	0.653885169405559	0.662424242424242	0.711212814645309	0.674477581659566	0.697171717171717	0.714187643020595	0.670014201663623	0.657070707070707	0.692906178489702
CHEMBL2114865	0.465116279069767	0.409774436090226	0.59280303030303	0.468992248062016	0.520050125313283	0.464015151515151	0.392441860465116	0.594611528822055	0.452651515151515	0.569767441860465	0.427318295739348	0.378787878787879	0.416666666666667	0.632832080200501	0.642045454545455
CHEMBL1737961	0.864750445632799	0.428385416666667	0.844924812030075	0.89349376114082	0.78125	0.887531328320802	0.837789661319073	0.735677083333333	0.899122807017544	0.899286987522282	0.768880208333333	0.861528822055138	0.787433155080214	0.606119791666667	0.899122807017544
CHEMBL1963695	0.817003367003367	0.835970176395708	0.749526694433926	0.787037037037037	0.846153846153846	0.821847784929951	0.833838383838384	0.843062374977269	0.828852707307838	0.826094276094276	0.856155664666303	0.821279818250663	0.80976430976431	0.883433351518458	0.821090496024233
CHEMBL1246087	0.63265306122449	0.767857142857143	0.620768229166667	0.695747001090512	0.857142857142857	0.732747395833333	0.686789219504596	0.857142857142857	0.798828125	0.758062003427325	0.875	0.739583333333333	0.734771771303941	0.803571428571429	0.772786458333333
CHEMBL1794467	0.784855769230769	0.785529715762274	0.797979797979798	0.909054487179487	0.778885197489849	0.857808857808858	0.846153846153846	0.861572535991141	0.774281274281274	0.864983974358974	0.733850129198966	0.823620823620824	0.850560897435897	0.84016242155777	0.798368298368298
CHEMBL1614547	0.645891043397969	0.58548644338118	0.726223199560198	0.674284395198523	0.643859649122807	0.738867509620671	0.639658356417359	0.613237639553429	0.805662451896646	0.668051708217913	0.648803827751196	0.762231995601979	0.657433056325023	0.631738437001595	0.752061572292469
CHEMBL1963764	0.759722222222222	0.696517966403382	0.778496168582376	0.811458333333333	0.74624541105796	0.789870689655172	0.768287037037037	0.708198909778618	0.792624521072797	0.837731481481482	0.712148181110246	0.742217432950192	0.786574074074074	0.719657358994326	0.811302681992337
CHEMBL1794499	0.71074834922964	0.759183673469388	0.804347826086957	0.797505502567865	0.863079777365492	0.851598993891484	0.745597945707997	0.846382189239332	0.758533956162415	0.788426265590609	0.829499072356215	0.816115702479339	0.761555392516508	0.84539270253556	0.784584980237154
CHEMBL2095143	0.721621621621622	0.521739130434783	0.415873015873016	0.910810810810811	0.763043478260869	0.587301587301587	0.945945945945946	0.630434782608696	0.528571428571429	0.767567567567568	0.695652173913043	0.565079365079365	0.910810810810811	0.665217391304348	0.533333333333333
CHEMBL2114816	0.510174418604651	0.4571875	0.545174221399938	0.711845930232558	0.607708333333333	0.543632439099599	0.621729651162791	0.586875	0.532839962997225	0.61155523255814	0.56875	0.544557508479803	0.584302325581395	0.581875	0.579401788467468
CHEMBL1863510	1	1	0.997973657548126	1	0.99330900243309	0.998986828774063	1	1	0.997973657548126	1	0.996350364963504	1	1	0.998175182481752	0.986828774062817
CHEMBL1614199	0.546997929606625	0.615671641791045	0.607875457875458	0.678053830227743	0.572494669509595	0.589377289377289	0.590269151138716	0.511194029850746	0.548168498168498	0.595859213250518	0.54273276474769	0.625091575091575	0.621325051759834	0.568230277185501	0.551465201465201
CHEMBL1963825	0.668478260869565	0.819150998255476	0.675369358429468	0.697161835748792	0.854622988951347	0.728192673547865	0.613224637681159	0.763520062027525	0.649261283141065	0.651117149758454	0.81081604962202	0.612224246104028	0.66304347826087	0.807133165342121	0.656142481279093
CHEMBL3215227	0.484230055658627	0.50752688172043	0.440740740740741	0.477572847320747	0.583870967741935	0.5005291005291	0.486212666884936	0.502150537634409	0.534920634920635	0.434901233220561	0.568817204301075	0.480687830687831	0.543471934228237	0.558064516129032	0.502645502645503
CHEMBL1738510	0.759462759462759	0.696586879432624	0.771900826446281	0.810570381998953	0.829676418439716	0.848484848484849	0.746380603523461	0.75709219858156	0.825619834710744	0.759811616954474	0.729443705673759	0.798760330578512	0.749171463457178	0.630984042553192	0.832231404958678
CHEMBL1963711	0.865648854961832	0.861739130434783	0.899491094147583	0.764885496183206	0.835652173913044	0.825699745547074	0.851908396946565	0.756521739130435	0.900763358778626	0.757251908396947	0.85304347826087	0.793893129770992	0.822900763358779	0.836521739130435	0.903307888040713
CHEMBL3214906	0.61954838183745	0.618638888888889	0.610480054090602	0.764408575853917	0.6225	0.660311020960108	0.702453737670172	0.634944444444444	0.65841784989858	0.740686394391457	0.66325	0.655848546315078	0.688758457650607	0.615666666666667	0.679851250845166
CHEMBL1613997	0.574666666666667	0.547244094488189	0.61402157164869	0.793333333333333	0.691929133858268	0.671802773497689	0.641333333333333	0.617125984251969	0.560477657935285	0.622	0.650590551181102	0.621725731895223	0.682	0.695866141732283	0.649460708782743
CHEMBL1963743	0.712672672672673	0.695546435628515	0.576	0.647447447447448	0.716978264173887	0.648933333333333	0.707507507507507	0.689010487916097	0.635066666666667	0.68948948948949	0.642118863049095	0.6678	0.717957957957958	0.744794041647667	0.634133333333333
CHEMBL1119333	0.98406862745098	0.924119241192412	0.969387755102041	0.998774509803922	0.860433604336043	0.939504373177843	0.992647058823529	0.886517615176152	0.980320699708455	0.995098039215686	0.85230352303523	0.842565597667638	0.997549019607843	0.892953929539295	0.971574344023324
CHEMBL1963815	0.66973886328725	0.761467889908257	0.761757105943152	0.756443079023724	0.777089015621126	0.84108527131783	0.70558115719406	0.733201090999256	0.845478036175711	0.727513227513227	0.746342672948177	0.767829457364341	0.672469704727769	0.777584924373915	0.839276485788114
CHEMBL1964118	0.767700501253133	0.80614132445431	0.72695374800638	0.849624060150376	0.831113577506474	0.799043062200957	0.791040100250627	0.784498705142434	0.821850079744817	0.788377192982456	0.75638179800222	0.766028708133971	0.820175438596491	0.804476507584166	0.84896331738437
CHEMBL1738183	0.612903225806452	0.616207951070336	0.592833092833093	0.678262702930635	0.745085190039318	0.654641654641655	0.748682268606367	0.705875928352993	0.730639730639731	0.716951296647691	0.679281345565749	0.609427609427609	0.703984819734345	0.663390126692879	0.732323232323232
CHEMBL1963824	0.794235159817352	0.776384535005225	0.774506578947369	0.772260273972603	0.80773249738767	0.825328947368421	0.764840182648402	0.815256008359457	0.743421052631579	0.799514840182648	0.838662486938349	0.791447368421053	0.810787671232877	0.747544409613375	0.720065789473684
CHEMBL2114821	0.642025316455696	0.613702431289641	0.736586183769282	0.591139240506329	0.701770613107822	0.761066398390342	0.595696202531645	0.678514799154334	0.702883970489604	0.667088607594937	0.681355708245243	0.739771965124078	0.551898734177215	0.664112050739958	0.711938296445339
CHEMBL1738593	0.739164696611505	0.805094786729858	0.740109674892284	0.80220646178093	0.878998815165877	0.857814336075206	0.873128447596533	0.890550947867299	0.803368585977282	0.772064617809299	0.810722748815166	0.86231884057971	0.850275807722616	0.870704976303318	0.82060321190756
CHEMBL1964114	0.868072289156626	0.8262509429218	0.823491928632116	0.896385542168675	0.822227809906965	0.887000849617672	0.896787148594377	0.783756600452602	0.846644010195412	0.853815261044177	0.754085994468192	0.849617672047579	0.886947791164659	0.805632386220769	0.863848768054375
CHEMBL1613929	0.529990167158309	0.493186813186813	0.627739849083723	0.78892166502786	0.593846153846154	0.640675530003593	0.760734185512946	0.581538461538462	0.737693136902623	0.782038675843986	0.444835164835165	0.651634926338484	0.779744346116027	0.552527472527473	0.725476104922745
CHEMBL1963786	0.76027676027676	0.741426991150443	0.739969834087481	0.781644281644282	0.797842920353982	0.784917043740573	0.787342287342287	0.774520648967552	0.780392156862745	0.735449735449735	0.721238938053097	0.758974358974359	0.784391534391534	0.813974926253687	0.790346907993967
CHEMBL1963751	0.740740740740741	0.706828885400314	0.686176142697882	0.681089743589744	0.725078492935636	0.752322556670383	0.67752849002849	0.690934065934066	0.750836120401338	0.665776353276353	0.724097331240188	0.734578223708659	0.647079772079772	0.737833594976452	0.725195094760312
CHEMBL1963753	0.737535612535613	0.811550151975684	0.678506923540036	0.672720797720798	0.897331982438365	0.730583985550873	0.798076923076923	0.909490037149612	0.751655629139073	0.763532763532764	0.813238770685579	0.693407585791692	0.808048433048433	0.864235055724417	0.803431667670078
CHEMBL1963766	0.821452702702703	0.789958023894091	0.784979423868313	0.753547297297297	0.819664191152728	0.805898491083676	0.79847972972973	0.831288343558282	0.808470507544582	0.793918918918919	0.736922828543752	0.770661865569273	0.817567567567568	0.78543752018082	0.788065843621399
CHEMBL1738242	0.631262327416174	0.596875	0.725231481481482	0.68284023668639	0.718125	0.692824074074074	0.630769230769231	0.66125	0.668287037037037	0.71301775147929	0.609765625	0.713425925925926	0.710848126232742	0.6634375	0.694212962962963
CHEMBL1963798	0.714869281045752	0.825068870523416	0.812179487179487	0.663398692810457	0.806473829201102	0.667307692307692	0.619281045751634	0.809573002754821	0.725641025641026	0.547385620915033	0.733987603305785	0.53974358974359	0.602532679738562	0.858815426997245	0.801282051282051
CHEMBL1794528	0.874488752556237	0.755081300813008	0.756860931236509	0.94614860259032	0.887872628726287	0.853993216157878	0.899625085207907	0.863143631436314	0.847826086956522	0.934560327198364	0.845105013550135	0.849984582176997	0.907464212678937	0.858739837398374	0.86941103916127
CHEMBL1738391	0.628295454545455	0.651850886339937	0.574548192771084	0.762272727272727	0.707116788321168	0.650100401606426	0.707272727272727	0.675052137643379	0.596385542168675	0.620681818181818	0.676160062565172	0.628765060240964	0.711818181818182	0.697080291970803	0.624748995983936
CHEMBL1963804	0.702067669172932	0.7843083652269	0.726990838618746	0.680868838763576	0.846227446692182	0.788865398167724	0.652568922305764	0.813285948605796	0.801127554615927	0.666771094402673	0.777268999453253	0.760535588442565	0.649540517961571	0.794559868780755	0.799436222692037
CHEMBL1963760	0.828073635765944	0.767885532591415	0.720730397422127	0.681459566074951	0.848966613672496	0.898496240601504	0.592373438527285	0.796502384737679	0.795918367346939	0.639381985535832	0.712771595124536	0.874328678839957	0.594017094017094	0.83147853736089	0.85499462943072
CHEMBL1963734	0.824268502581755	0.778027823240589	0.837291666666667	0.890103270223752	0.806669394435352	0.831041666666667	0.827624784853701	0.750409165302782	0.843333333333333	0.847160068846816	0.84236906710311	0.759791666666667	0.807314974182444	0.801350245499182	0.817708333333333
CHEMBL1963773	0.628708791208791	0.761579994316567	0.746354515050167	0.620192307692308	0.782182438192668	0.709832775919732	0.64739010989011	0.744955953395851	0.663946488294314	0.60103021978022	0.764279624893436	0.647892976588629	0.64271978021978	0.757743677181018	0.653110367892976
CHEMBL1963820	0.691322901849218	0.694230769230769	0.846805736636245	0.781507823613087	0.725990675990676	0.772924815297697	0.700142247510669	0.745221445221445	0.804650152107779	0.786628733997155	0.725874125874126	0.785093437635811	0.739687055476529	0.744289044289044	0.842242503259452
CHEMBL1963738	0.629539295392954	0.748190476190476	0.769296833064949	0.722493224932249	0.787714285714286	0.828448738593666	0.658807588075881	0.698571428571429	0.83768115942029	0.660478771454381	0.720428571428571	0.79495437466452	0.672177055103884	0.749333333333333	0.816317767042405
CHEMBL1614433	0.56140350877193	0.690883190883191	0.626515151515152	0.725146198830409	0.68019943019943	0.665909090909091	0.726608187134503	0.685897435897436	0.671969696969697	0.780701754385965	0.655270655270655	0.596212121212121	0.725146198830409	0.601139601139601	0.631818181818182
CHEMBL1964081	0.843625192012289	0.75571206743567	0.80958605664488	0.843701996927803	0.836180124223603	0.854611474219317	0.829416282642089	0.735803016858917	0.817719680464778	0.805145929339478	0.76519520851819	0.802614379084967	0.830030721966206	0.814995563442768	0.848511256354394
CHEMBL1963787	0.677004873726185	0.795614035087719	0.772129319955407	0.658839167035888	0.816791979949875	0.785841694537347	0.678001772264067	0.766666666666667	0.8	0.621067789100576	0.722681704260651	0.749944258639911	0.68398316349136	0.812406015037594	0.800780379041249
CHEMBL1794531	0.578014184397163	0.50374531835206	0.393162393162393	0.602245862884161	0.535580524344569	0.544159544159544	0.513002364066194	0.394194756554307	0.551994301994302	0.470449172576832	0.477059925093633	0.546296296296296	0.447990543735225	0.368913857677903	0.475783475783476
CHEMBL1614030	0.57421875	0.680266326675167	0.615449915110357	0.76467803030303	0.745998016716249	0.69927843803056	0.6484375	0.681187136988242	0.680178268251273	0.728693181818182	0.700807479813005	0.736205432937182	0.659801136363636	0.679699674174812	0.673493208828523
CHEMBL1963821	0.688340336134454	0.756701959900879	0.752204585537919	0.703991596638656	0.771795449425546	0.846056941295037	0.614495798319328	0.790155440414508	0.720710506424792	0.584558823529412	0.762333858977247	0.830876795162509	0.631827731092437	0.805699481865285	0.747921390778534
CHEMBL1738513	0.668591965087922	0.577823691460055	0.591580924383472	0.6970863817225	0.62157943067034	0.564919157275845	0.624117571556925	0.551515151515152	0.50302139474114	0.603260171993326	0.562350780532599	0.609668463171648	0.605955589783083	0.594582185491276	0.513963743263106
CHEMBL1738131	0.703407601572739	0.717538759689923	0.641064257028112	0.815989515072084	0.788396317829457	0.757781124497992	0.777981651376147	0.702519379844961	0.776606425702811	0.791743119266055	0.749636627906977	0.669176706827309	0.779554390563565	0.721899224806202	0.786897590361446
CHEMBL1614504	0.629242081447964	0.730895915678524	0.602722772277228	0.729638009049774	0.836627140974967	0.712871287128713	0.722850678733032	0.832674571805007	0.66460396039604	0.653280542986425	0.742918313570488	0.678836633663366	0.681278280542986	0.752305665349144	0.673267326732673
CHEMBL3214993	0.63081983805668	0.703216374269006	0.698795180722892	0.745192307692308	0.745004873294347	0.791598827743406	0.666371457489878	0.717714424951267	0.714425268642136	0.744116902834008	0.73635477582846	0.711169000325627	0.671432186234818	0.750730994152047	0.751872354281993
CHEMBL1963747	0.83343048673856	0.82641065830721	0.763219544846051	0.834450597493442	0.835031347962382	0.81760374832664	0.830807344797435	0.828565830721003	0.835508701472557	0.892159720198193	0.841496865203762	0.820699464524766	0.819294666278053	0.83326802507837	0.829149933065596
CHEMBL1794350	0.603448275862069	0.598255813953488	0.57286432160804	0.723522167487685	0.58546511627907	0.724246231155779	0.640394088669951	0.596220930232558	0.653894472361809	0.673645320197044	0.58546511627907	0.728643216080402	0.661945812807882	0.660755813953488	0.630025125628141
CHEMBL1963712	0.721610039791858	0.702447402318592	0.753366537539199	0.752678298132844	0.774796049806784	0.845231507102011	0.664370982552801	0.728638900815801	0.87124146836377	0.724364860728497	0.801631601545728	0.806769968640472	0.703244566880931	0.790038643194504	0.87382401770891
CHEMBL1909089	0.850545566313201	0.911238825031928	0.90529440870856	0.909712617181497	0.895274584929757	0.918951014349332	0.875134470570155	0.896871008939974	0.92360217714003	0.906485323497772	0.90581098339719	0.896882731321128	0.872368218841248	0.929278416347382	0.933498268184067
CHEMBL1963705	0.823320413436693	0.73592246745897	0.754788939932391	0.770025839793282	0.717458970005659	0.747074629453064	0.745962532299742	0.698571024335031	0.782352431307966	0.737564599483204	0.663271080928127	0.715263933431568	0.746204780361757	0.758418222976797	0.812429574412759
CHEMBL1738249	0.508361204013378	0.489046941678521	0.557471264367816	0.491161012900143	0.439971550497866	0.555862068965517	0.409937888198758	0.376813655761024	0.463448275862069	0.50394171046345	0.483357041251778	0.574252873563218	0.379359770664118	0.360312944523471	0.490114942528736
CHEMBL1963796	0.66007154035323	0.706006979062812	0.67901067711853	0.602280348759222	0.797981056829511	0.794026219759427	0.607310529845741	0.705134596211366	0.708474118124071	0.588642968924659	0.775299102691924	0.803622111096094	0.658283031522468	0.767696909272183	0.708203811325855
CHEMBL1614170	0.57308201058201	0.59486879328846	0.632654949121184	0.73098544973545	0.741976392547069	0.700277520814061	0.698578042328042	0.659155204370305	0.689731729879741	0.708994708994709	0.653545995512633	0.626456984273821	0.717261904761905	0.684323480636036	0.666419981498612
CHEMBL1794383	0.746452223273415	0.724917081260365	0.71379980563654	0.843897824030274	0.745854063018242	0.757045675413022	0.734153263954588	0.711857379767828	0.766763848396501	0.755912961210975	0.75497512437811	0.685131195335277	0.733207190160833	0.787728026533997	0.724975704567541
CHEMBL1963731	0.867669172932331	0.899044205495818	0.786282578875172	0.922423706324635	0.933542413381123	0.87119341563786	0.905086245024325	0.877240143369176	0.832921810699588	0.903051747014595	0.888291517323775	0.828669410150892	0.906590004422822	0.901508363201912	0.869821673525377
CHEMBL1963819	0.744883040935673	0.756478127612148	0.805259146341463	0.801900584795322	0.779813318473112	0.88467987804878	0.756944444444444	0.758567846196712	0.850914634146341	0.784868421052632	0.768041237113402	0.839939024390244	0.759283625730994	0.764279743661187	0.881173780487805
CHEMBL1863512	0.979310344827586	0.980208333333333	0.974206349206349	0.979310344827586	1	0.984623015873016	0.993103448275862	0.998958333333333	0.961805555555556	1	0.998958333333333	0.949156746031746	1	0.990625	0.97718253968254
CHEMBL3214970	0.920445289166441	0.931739879414298	0.953164160401003	0.944610371979365	0.938630490956072	0.943609022556391	0.919359218028781	0.909991386735573	0.925751879699248	0.918816182459951	0.900732127476313	0.907894736842105	0.936464838446918	0.939491817398794	0.93796992481203
CHEMBL3214971	0.863049095607235	0.867442135096835	0.862563572790846	0.857278208440999	0.902781058101086	0.842577876668786	0.809130060292851	0.853418752952291	0.821837253655435	0.797114556416882	0.833461265942371	0.814248251748252	0.825839793281654	0.879457959376476	0.826605212968849
CHEMBL1738414	0.855237727097024	0.646231721034871	0.661046511627907	0.643989176652493	0.66310461192351	0.636337209302326	0.452841128720526	0.47244094488189	0.577616279069767	0.655585620409741	0.559055118110236	0.545930232558139	0.48782373405489	0.638920134983127	0.564970930232558
CHEMBL1963802	0.62813963388676	0.722196424425354	0.7	0.681779480630055	0.764337125609473	0.785780885780886	0.645487441464453	0.755282098908753	0.679020979020979	0.662515964240102	0.717320640817274	0.75460372960373	0.635589612601107	0.75296029719062	0.695337995337995
CHEMBL1964100	0.689075630252101	0.589861111111111	0.638026607538803	0.660877684407096	0.636388888888889	0.659275683665928	0.691690009337068	0.617777777777778	0.714338507021434	0.601120448179272	0.598819444444444	0.567627494456763	0.678057889822596	0.657777777777778	0.7839985218034
CHEMBL1963780	0.690419161676647	0.818675889328063	0.764705882352941	0.688023952095808	0.864130434782609	0.845588235294118	0.755389221556886	0.845108695652174	0.834705882352941	0.72125748502994	0.784832015810277	0.765294117647059	0.746706586826347	0.801630434782609	0.82
CHEMBL1963795	0.626522702104097	0.75547201336675	0.656687675070028	0.673680324843116	0.828487886382623	0.725052521008403	0.630398671096346	0.768421052631579	0.708508403361345	0.697397563676634	0.759482038429407	0.684961484593838	0.650978220745663	0.787635756056809	0.702906162464986
CHEMBL1737865	0.494155464640561	0.565393219755636	0.599236241891609	0.643580751996883	0.497418688693856	0.59353421217828	0.610753945061368	0.564446738943383	0.560368277882402	0.582407948568089	0.539709172259508	0.509782381251308	0.5965322423534	0.589485458612975	0.559426658296715
CHEMBL1963696	0.666500166500167	0.682436342592593	0.707317073170732	0.708291708291708	0.796006944444444	0.796534017971759	0.704295704295704	0.687065972222222	0.756258023106547	0.678654678654679	0.681568287037037	0.780327342747112	0.701798201798202	0.727719907407407	0.801187419768935
CHEMBL1963822	0.668956043956044	0.685801630434783	0.676487414187643	0.706593406593407	0.727241847826087	0.715675057208238	0.787087912087912	0.71976902173913	0.685068649885584	0.760714285714286	0.514945652173913	0.757580091533181	0.778571428571428	0.712635869565217	0.68850114416476
CHEMBL1963801	0.839978331527627	0.846554116558742	0.788288288288288	0.695124593716143	0.809666975023127	0.787489102005231	0.629252437703142	0.785615171137835	0.750363266492299	0.571560130010834	0.799491211840888	0.744623655913978	0.608667388949079	0.823658649398705	0.784292356873002
CHEMBL1963818	0.802604166666667	0.832650133224021	0.792667099286178	0.799479166666667	0.78622668579627	0.762816353017521	0.810833333333333	0.7692150030744	0.77428077006273	0.7459375	0.753330600532896	0.716039368375514	0.805833333333333	0.777823324451732	0.77514600908501
CHEMBL1964116	0.784	0.659698025551684	0.670133941293816	0.666042553191489	0.681599469055915	0.730692504987176	0.637446808510638	0.698855151816824	0.700769449985751	0.669276595744681	0.632736021237763	0.733898546594471	0.641702127659574	0.718765555002489	0.709033912795668
CHEMBL1963754	0.754467582336435	0.845609168552449	0.804315476190476	0.692807561660021	0.842178261186948	0.753826530612245	0.707354895879486	0.770202204540477	0.733205782312925	0.652525476295968	0.788743703919994	0.733577806122449	0.704622655442327	0.811519088984597	0.730123299319728
CHEMBL1738424	0.859654943596549	0.876168224299065	0.843450956937799	0.950729927007299	0.937640992587818	0.957386363636364	0.944757796947578	0.903561069932324	0.957087320574163	0.914067684140677	0.929745407669997	0.936752392344498	0.947743861977439	0.916290686432485	0.970394736842105
CHEMBL3215192	0.725114620478859	0.777598710717164	0.726194548979359	0.817422312786551	0.813859790491539	0.770213251225909	0.819256240448293	0.787613675607229	0.73394913901243	0.76698930208864	0.712674110740186	0.709430949937279	0.817931737137035	0.802348336594912	0.752195233207892
CHEMBL1963720	0.742611336032389	0.671285935617146	0.750597228858098	0.704048582995951	0.695730762609744	0.7910176779742	0.672672064777328	0.681786882423825	0.709030100334448	0.657844129554656	0.675589602341195	0.762876254180602	0.679453441295547	0.702960922706146	0.719350215002389
CHEMBL1963728	0.71875	0.768089053803339	0.773060796645702	0.751666666666667	0.820037105751391	0.751572327044025	0.6725	0.781076066790352	0.756289308176101	0.717083333333333	0.795918367346939	0.707547169811321	0.713333333333333	0.783395176252319	0.753668763102725
CHEMBL1614171	0.718855218855219	0.721206969825754	0.737869822485207	0.742424242424242	0.770505737356566	0.891715976331361	0.78956228956229	0.771355716107097	0.857988165680473	0.732884399551066	0.726731831704207	0.810650887573964	0.751402918069585	0.756906077348066	0.850295857988166
CHEMBL1963765	0.705935090550475	0.818884723523899	0.734572230014025	0.752734445042137	0.824976569821931	0.802769985974755	0.755961986731218	0.779053420805998	0.788218793828892	0.721176259637798	0.783973758200562	0.741584852734923	0.769410077102385	0.813495782567948	0.780329593267882
CHEMBL1963710	0.66530341549685	0.780009920634921	0.75676613462873	0.649054935337681	0.830357142857143	0.832523710386306	0.690063004310821	0.778521825396825	0.818875780707842	0.60163590140378	0.769965277777778	0.816331251445755	0.695700232121145	0.811755952380952	0.833795975017349
CHEMBL1963834	0.758636363636364	0.744104435710275	0.735172672672673	0.752909090909091	0.749017405951713	0.841685435435435	0.728272727272727	0.7204753883586	0.766234984984985	0.687590909090909	0.710789818454052	0.736861861861862	0.711272727272727	0.74489986898746	0.80274024024024
CHEMBL1963697	0.755901086549269	0.769111302847282	0.748109902268117	0.767609591607344	0.781794650560828	0.775677669186797	0.763675533907831	0.762295081967213	0.743776507468191	0.66251405020607	0.757420189818809	0.738659413608704	0.770700636942675	0.804400345125108	0.72220173335792
CHEMBL3214929	0.718943089430894	0.67725	0.772384219554031	0.752926829268293	0.726	0.803259005145798	0.699186991869919	0.74425	0.793053173241853	0.698861788617886	0.66625	0.791680960548885	0.758048780487805	0.684375	0.777530017152659
CHEMBL1963791	0.891745730550285	0.837307152875175	0.802330097087379	0.867552182163188	0.844008103475144	0.80368932038835	0.853225806451613	0.845566464079788	0.8	0.864705882352941	0.776686925354527	0.810194174757282	0.832637571157495	0.856942496493689	0.783300970873786
CHEMBL1963729	0.643411927877947	0.665760869565217	0.760832625318607	0.584188626907074	0.715928093645485	0.723449447748513	0.579334257975035	0.66565635451505	0.689323137921269	0.671428571428571	0.643290133779264	0.733786462758425	0.608183079056866	0.663252508361204	0.721183800623053
CHEMBL1963733	0.754340071343639	0.855252159375871	0.69462962962963	0.804042806183115	0.919754806352744	0.716018518518518	0.747919143876338	0.791306770688214	0.750092592592593	0.792330558858502	0.853371412649763	0.658101851851852	0.733293697978597	0.826692672053497	0.770092592592593
CHEMBL1737860	0.515837104072398	0.517148760330578	0.416593115622242	0.666289592760181	0.552479338842975	0.467784642541924	0.703619909502262	0.521694214876033	0.476610767872904	0.682126696832579	0.539669421487603	0.397616946160635	0.601809954751131	0.651239669421488	0.47594880847308
CHEMBL1963763	0.714071214071214	0.666666666666667	0.719477124183006	0.737451737451738	0.729749417249417	0.835555555555556	0.743135993135993	0.706876456876457	0.868888888888889	0.748069498069498	0.734921328671329	0.760457516339869	0.728013728013728	0.734120046620047	0.881830065359477
CHEMBL1963688	0.707291666666667	0.684800944669366	0.692264808362369	0.779583333333333	0.701163967611336	0.766968641114983	0.761354166666667	0.707236842105263	0.71177700348432	0.75109375	0.702471322537112	0.713170731707317	0.751458333333333	0.735745614035088	0.72397212543554
CHEMBL1964022	0.454954954954955	0.484210526315789	0.499881291547958	0.583896396396396	0.488304093567251	0.536443494776828	0.486298798798799	0.471823498139288	0.548433048433048	0.522240990990991	0.386656034024455	0.547364672364672	0.453078078078078	0.427379053694843	0.586657169990503
CHEMBL2114926	0.615881658357386	0.701535690586785	0.661659797083069	0.75537916557334	0.725187221537587	0.719086873811034	0.723366570453949	0.715897241444687	0.675412175015853	0.707917869325636	0.66866527632951	0.712824984147115	0.728286538966151	0.729358233007868	0.697447685478757
CHEMBL1963793	0.710549008335729	0.761210522563627	0.774479210592899	0.695745903995401	0.783560276609396	0.793877034663068	0.708968094279966	0.794966849647109	0.756009108543476	0.689027019258408	0.816354174092821	0.761069410474825	0.689494107502156	0.792542952876595	0.761744117399005
CHEMBL1963708	0.714530892448513	0.77337454848569	0.726190476190476	0.739865969271004	0.797235343150875	0.786605118237771	0.737577639751553	0.794040011114198	0.760042112082928	0.701046093494606	0.779417893859405	0.752267573696145	0.732347172278522	0.805848846901917	0.74894719792679
CHEMBL1738494	0.578743961352657	0.695981087470449	0.428571428571429	0.903864734299517	0.675177304964539	0.419047619047619	0.871014492753623	0.590070921985816	0.4	0.868599033816425	0.728132387706856	0.566666666666667	0.838647342995169	0.564539007092199	0.661904761904762
CHEMBL1963737	0.905381003972553	0.790478279947345	0.801133679735475	0.756951968219574	0.776217639315489	0.819555975436939	0.758035391838209	0.790587977182975	0.782868839552826	0.686800288912965	0.724659938569548	0.854038734057629	0.678764897074756	0.808797718297499	0.809478822232719
CHEMBL1963833	0.8064012490242	0.812807881773399	0.846513605442177	0.75144418423107	0.896916621054552	0.875850340136054	0.782513661202186	0.898923554095968	0.876275510204082	0.691178766588603	0.860609377850757	0.918792517006803	0.767993754879001	0.833059660645868	0.892857142857143
CHEMBL1963745	0.881462191358025	0.837577962577962	0.797558758602779	0.902681327160494	0.859147609147609	0.861965978444358	0.869791666666667	0.775467775467775	0.875081158291131	0.861593364197531	0.838357588357588	0.863848850798598	0.84741512345679	0.854339916839917	0.902999610440202
CHEMBL1963724	0.731618371772127	0.695556133056133	0.786230195712954	0.734082397003745	0.803534303534304	0.801491146318733	0.725704711216243	0.747011434511434	0.791821994408201	0.671003351074315	0.788461538461539	0.764387232059646	0.703331362113148	0.745582120582121	0.780172413793103
CHEMBL1738639	0.556612217498322	0.532019704433498	0.507598507598508	0.552293577981651	0.57877452251318	0.538743288743289	0.583799507719848	0.550384582145018	0.514855764855765	0.533117028417991	0.58895082533921	0.571730821730822	0.568449317520698	0.544939936047014	0.504390754390754
CHEMBL3214944	0.655005941770648	0.675092114959469	0.710955607060082	0.742721330956625	0.753426676492262	0.746924585487609	0.738710635769459	0.786735445836404	0.716705295061508	0.707887700534759	0.732940309506264	0.751559992868604	0.726827094474153	0.783198231392778	0.716437867712605
CHEMBL1963938	0.647540983606557	0.626553362573099	0.596457845433255	0.668107302533532	0.660087719298246	0.612265807962529	0.69806259314456	0.608826754385965	0.50190281030445	0.628017883755589	0.662372076023392	0.601727166276347	0.690312965722802	0.672240497076023	0.515222482435597
CHEMBL1963828	0.751198779424586	0.821390374331551	0.73260547742413	0.790867480383609	0.86890756302521	0.84900074019245	0.747493461203139	0.814362108479756	0.813841598815692	0.783838273757629	0.834606569900688	0.830495928941525	0.702484742807323	0.855920550038197	0.820133234641007
CHEMBL1963808	0.769899225938367	0.733363201911589	0.806953080836631	0.76887688038557	0.780645161290323	0.871961560203505	0.759821819775084	0.726403823178017	0.770680233653665	0.715276763546078	0.760722819593787	0.837007725645374	0.744267562436103	0.767562724014337	0.821179574147353
CHEMBL1909172	0.902373941847626	0.982011070110701	0.968816067653277	0.895288921604711	0.982933579335793	0.971106412966878	0.914795730585204	0.958717712177122	0.974453840732911	0.899705557600294	0.948108856088561	0.944855532064834	0.929517850570482	0.947186346863469	0.980796335447498
CHEMBL1738369	0.670800056045958	0.726687643020595	0.73388285135384	0.735428051001822	0.733838672768879	0.754466752624793	0.725620008406894	0.737557208237986	0.713851538036471	0.721451590304049	0.68320938215103	0.75488119358998	0.719735182849937	0.740060068649885	0.724074415177749
CHEMBL1963812	0.797752808988764	0.676272066458982	0.773707073190722	0.819792566983578	0.712134698116006	0.802885009425457	0.797925669835782	0.678163477228898	0.817146135562659	0.779775280898876	0.704124017208129	0.760224571756413	0.80561797752809	0.684616525738021	0.818703384968445
CHEMBL1909182	0.780701754385965	0.836363636363636	0.656023222060958	0.895989974937343	0.949090909090909	0.811030478955007	0.713032581453634	0.943030303030303	0.800580551523948	0.768170426065163	0.902222222222222	0.766618287373004	0.793233082706767	0.947474747474747	0.775616835994195
CHEMBL1963794	0.863225806451613	0.775951402537073	0.723045267489712	0.860967741935484	0.823923530462748	0.738374485596708	0.90010752688172	0.837502233339289	0.74022633744856	0.810860215053763	0.846480257280686	0.711471193415638	0.892688172043011	0.821332856887618	0.75462962962963
CHEMBL1963836	0.766426642664267	0.748656515897895	0.646190476190476	0.774977497749775	0.755597850425437	0.67047619047619	0.720822082208221	0.731862964621585	0.690634920634921	0.777227722772277	0.698947604120018	0.667539682539683	0.751425142514251	0.759628302731751	0.680793650793651
CHEMBL1964105	0.637659339556358	0.708592641118026	0.717087765957447	0.634347084211583	0.7457145976635	0.782358156028369	0.698785506373582	0.728463806092368	0.77238475177305	0.624410318177256	0.682388907085926	0.748393173758865	0.700391448358928	0.706408996615351	0.762965425531915
CHEMBL1963809	0.759624094202899	0.793106347204708	0.742945958871353	0.764492753623188	0.81067675493905	0.75609756097561	0.735054347826087	0.787978142076503	0.791128646580583	0.749320652173913	0.82526271542665	0.772357723577236	0.73245018115942	0.788650693568726	0.788737446197991
CHEMBL1738495	0.323763955342903	0.313953488372093	0.397037037037037	0.523125996810207	0.569767441860465	0.448148148148148	0.652312599681021	0.577519379844961	0.32962962962963	0.4896331738437	0.772609819121447	0.519259259259259	0.543062200956938	0.448320413436693	0.318518518518519
CHEMBL1963800	0.738461538461539	0.796545703953112	0.742504996668887	0.758818958818959	0.821299413892006	0.742504996668887	0.78034188034188	0.798478613293428	0.757028647568288	0.712859362859363	0.800598578376356	0.76402398401066	0.760528360528361	0.835515650330465	0.759893404397069
CHEMBL1963748	0.766651104886399	0.83187952600395	0.711394597999843	0.733737939620293	0.852287689269256	0.799354279864556	0.77583255524432	0.802995391705069	0.758563666430428	0.748755057578587	0.846774193548387	0.77297424994094	0.759103641456583	0.847514812376564	0.757382471060713
CHEMBL1794303	0.56318407960199	0.740963855421687	0.592673992673993	0.78407960199005	0.77376171352075	0.788278388278388	0.628855721393035	0.795850066934404	0.75018315018315	0.774129353233831	0.748995983935743	0.799267399267399	0.570149253731343	0.671352074966533	0.777289377289377
CHEMBL3215210	0.804955947136564	0.895179927368769	0.8435960591133	0.918942731277533	0.903928689336415	0.989532019704433	0.913876651982379	0.832618025751073	0.96551724137931	0.936123348017621	0.849785407725322	0.959975369458128	0.937775330396476	0.847144272036976	0.974753694581281
CHEMBL1737912	0.498910127431254	0.524001924001924	0.550315528510255	0.574782025486251	0.618759018759019	0.634324994365562	0.506874580818243	0.582780182780183	0.598828036961911	0.721160295103957	0.582491582491582	0.679006085192698	0.530432595573441	0.573737373737374	0.536623844940275
CHEMBL1737967	0.668005071851226	0.672031317964332	0.712761904761905	0.704353338968724	0.6705089169204	0.775428571428571	0.642645815722739	0.607655502392344	0.723238095238095	0.587066779374472	0.714332318399304	0.767619047619048	0.660608622147084	0.700086994345367	0.696761904761905
CHEMBL3214902	0.801201771030993	0.850294365012616	0.862360668789809	0.862871600253004	0.897708158116064	0.895700636942675	0.805692599620493	0.822855340622372	0.839968152866242	0.811448450347881	0.867851135407906	0.866739649681529	0.830993042378242	0.880361648444071	0.867137738853503
CHEMBL1614469	0.633958007981954	0.731066176470588	0.599025974025974	0.747006767308693	0.838419117647059	0.777597402597403	0.775811209439528	0.795588235294118	0.730194805194805	0.686100989068194	0.754503676470588	0.726623376623377	0.722540343571057	0.780330882352941	0.756818181818182
CHEMBL1909087	0.854925303454715	0.936411661123068	0.931847052845528	0.892156862745098	0.954412052435923	0.968241869918699	0.871148459383753	0.937976912541577	0.956808943089431	0.879318394024276	0.953825083153982	0.949695121951219	0.878851540616246	0.953042457444727	0.965193089430894
CHEMBL1909088	0.841386554621849	0.942528735632184	0.937835249042146	0.895518207282913	0.934406130268199	0.923132183908046	0.844117647058824	0.918620689655172	0.935009578544061	0.879271708683473	0.913563218390804	0.902346743295019	0.830392156862745	0.943908045977011	0.94477969348659
CHEMBL1909140	0.898888221153846	0.937990196078431	0.940024059116687	0.920072115384615	0.933333333333333	0.954803230795669	0.906850961538462	0.906862745098039	0.965973534971645	0.934495192307692	0.913235294117647	0.945866987454889	0.890625	0.956617647058824	0.968379446640316
CHEMBL1963761	0.653206147323794	0.744466913829907	0.611666666666667	0.517329093799682	0.751937984496124	0.618888888888889	0.579226285108638	0.741377373328839	0.649444444444444	0.557074721780604	0.699977530614538	0.586203703703704	0.573184949655538	0.762161554881474	0.626666666666667
CHEMBL1909093	0.854323308270677	0.853002070393375	0.774074074074074	0.661654135338346	0.94824016563147	0.931481481481481	0.843984962406015	0.931159420289855	0.837037037037037	0.581766917293233	0.981366459627329	0.865740740740741	0.776315789473684	0.743271221532091	0.887037037037037
CHEMBL1963735	0.774057518765286	0.794631259922067	0.763636363636364	0.871974361136881	0.843339587242026	0.8111004784689	0.811166399595176	0.850339154279117	0.779712918660287	0.836636585982964	0.787234810217925	0.769904306220096	0.843214978493717	0.850266993794198	0.799234449760766
CHEMBL1909104	0.852815485168426	0.952755905511811	0.911690496215307	0.876822523881347	0.946481299212598	0.946383515559293	0.826671694318753	0.918430118110236	0.923149705634987	0.856334841628959	0.942052165354331	0.924201009251472	0.819507290095525	0.953617125984252	0.931349873843566
CHEMBL1909114	0.94959244959245	0.945919044459191	0.970342522974102	0.97039897039897	0.898805573988056	0.929824561403509	0.984984984984985	0.909754479097545	0.95655806182122	0.92020592020592	0.787491705374917	0.949874686716792	0.968253968253968	0.920703384207034	0.958228905597327
CHEMBL1963759	0.807069359756098	0.710747978436658	0.837415404447309	0.793921493902439	0.779986522911051	0.878826941669352	0.71703506097561	0.79840521114106	0.82049629390912	0.665301067073171	0.789308176100629	0.886883660973252	0.684451219512195	0.829514824797844	0.855623590074122
CHEMBL1963694	0.856523955147808	0.781664571987153	0.651706700379267	0.730377166156983	0.724479821254015	0.65834386852086	0.790519877675841	0.720849043429689	0.778445006321112	0.680937818552497	0.644113950565564	0.539190897597977	0.767838939857288	0.779639715123586	0.753160556257901
CHEMBL1963756	0.70593149540518	0.721021187484602	0.711222500696185	0.683444722918407	0.737620103473762	0.814954051796157	0.702102478418268	0.723269278147327	0.734335839598997	0.637844611528822	0.693335796994333	0.75494291283765	0.693887496519075	0.721421532397142	0.749025341130604
CHEMBL1909215	0.867722473604827	0.947344322344322	0.941927083333333	0.914027149321267	0.983516483516483	0.93828125	0.893212669683258	0.960622710622711	0.92734375	0.854449472096531	0.953754578754579	0.8828125	0.912820512820513	0.968406593406593	0.91640625
CHEMBL1909213	0.686163522012579	0.760416666666667	0.783088235294118	0.844025157232704	0.795138888888889	0.698529411764706	0.532075471698113	0.763888888888889	0.944852941176471	0.626415094339623	0.946180555555556	0.643382352941177	0.522012578616352	0.940972222222222	0.948529411764706
CHEMBL1963783	0.627015250544662	0.760115983579853	0.752771019194377	0.684168482207698	0.819182902195869	0.80852933225196	0.667755991285403	0.802893073564866	0.751554474182211	0.657879448075527	0.817097804131101	0.756488240064882	0.6760348583878	0.817879715905389	0.777372262773723
CHEMBL1963827	0.798882113821138	0.729923471858956	0.729923325262308	0.792174796747968	0.752203816719946	0.794390637610977	0.779166666666667	0.74522910006781	0.782990314769976	0.694207317073171	0.725079918628306	0.74909200968523	0.79400406504065	0.766928218541122	0.806900726392252
CHEMBL1909170	0.905527210884354	0.974169741697417	0.94417188293013	0.886224489795918	0.964184935967007	0.956690915242768	0.908333333333333	0.945300629476883	0.978007105396718	0.904421768707483	0.944215324506186	0.946540348502791	0.925340136054422	0.944866507488604	0.981221451531044
CHEMBL1963707	0.723753829016987	0.733547702297702	0.709270805096232	0.708298524087998	0.799263236763237	0.767416644076986	0.728627123363965	0.769230769230769	0.734684196259149	0.674081035923141	0.762518731268731	0.74268094334508	0.728627123363965	0.793206793206793	0.759419896991054
CHEMBL1909192	0.388888888888889	0.560526315789474	0.455197132616487	0.177777777777778	0.370175438596491	0.831541218637993	0.518518518518519	0.136842105263158	0.14336917562724	0.475925925925926	0.408771929824561	0.315412186379928	0.444444444444444	0.314035087719298	0.021505376344086
CHEMBL1909206	0.981132075471698	0.915602836879433	1	0.99622641509434	0.924113475177305	0.887272727272727	0.886792452830189	0.846099290780142	0.989090909090909	0.964150943396227	0.766666666666667	1	0.849056603773585	0.60709219858156	0.996363636363636
CHEMBL1909095	0.952651515151515	0.914285714285714	0.989169675090253	0.979166666666667	0.900446428571429	0.954873646209386	0.935606060606061	0.948660714285714	0.918772563176895	0.946969696969697	0.888392857142857	0.895306859205776	0.933712121212121	0.775892857142857	0.918772563176895
CHEMBL1909097	0.988805970149254	0.583916083916084	0.939324817518248	0.996268656716418	0.555944055944056	0.75	0.973880597014925	0	0.937043795620438	1	0.527972027972028	0.972171532846715	0.992537313432836	0	0.970802919708029
CHEMBL1963706	0.825893719806763	0.707343830665978	0.699352714058596	0.835072463768116	0.762261228704182	0.690267999091528	0.829855072463768	0.712570986060919	0.692709516238928	0.805410628019324	0.756711409395973	0.704235748353395	0.810724637681159	0.759615384615385	0.740972064501476
CHEMBL1614522	0.618521549372613	0.660173729928929	0.56125338586555	0.598677032187671	0.601342458541722	0.599729130755971	0.646822149481724	0.648854961832061	0.631617828121152	0.673554282596836	0.659120821268755	0.659935976360502	0.64259410801964	0.694130034219531	0.634695887712386
CHEMBL1909115	0.968927556818182	0.97347670250896	0.970702677958343	0.9609375	0.991397849462366	0.966811627374685	0.897727272727273	0.936200716845878	0.962005035477226	0.920454545454545	0.982078853046595	0.947356374456397	0.900213068181818	0.936200716845878	0.96932936598764
CHEMBL1738502	0.654704393834829	0.69234360410831	0.732093663911846	0.699792960662526	0.715966386554622	0.728956228956229	0.66482631700023	0.666666666666667	0.63253749617386	0.690821256038647	0.710084033613445	0.725130088766452	0.585461237635151	0.710644257703081	0.66934496479951
CHEMBL1909139	0.800452488687783	0.954818415784959	0.943873517786561	0.888386123680241	0.98026880183014	0.95098814229249	0.81236802413273	0.982842436374035	0.958577075098814	0.905580693815988	0.9182156133829	0.931857707509882	0.795173453996983	0.983128395767801	0.960948616600791
CHEMBL1909204	0.89484126984127	0.899918300653595	0.907924528301887	0.94047619047619	0.883986928104575	0.896603773584906	0.817460317460317	0.803513071895425	0.923018867924528	0.849867724867725	0.653390522875817	0.827169811320755	0.852292768959436	0.832924836601307	0.910943396226415
CHEMBL1963810	0.682241250930752	0.756043956043956	0.684770951432511	0.74059940431869	0.730565730565731	0.66301516776467	0.65794862248697	0.665445665445665	0.74705071242531	0.693596425912137	0.661986161986162	0.667994484449211	0.656273268801191	0.797313797313797	0.733415045196875
CHEMBL1963767	0.775177462289263	0.77303956408434	0.64853766025641	0.7122892635315	0.797520334833768	0.763521634615385	0.771295474711624	0.761036089394298	0.702724358974359	0.671916592724046	0.790807865434731	0.663211137820513	0.775732031943212	0.812998499565664	0.722956730769231
CHEMBL1963966	0.733467741935484	0.744364754098361	0.736263736263736	0.922983870967742	0.919569672131148	0.771062271062271	0.920967741935484	0.742827868852459	0.808608058608059	0.874596774193548	0.894467213114754	0.713827838827839	0.914516129032258	0.911885245901639	0.743360805860806
CHEMBL1963816	0.778666666666667	0.74322062269836	0.819922013470401	0.668	0.673083361232005	0.830202056008508	0.777166666666667	0.727485771677268	0.816022686990429	0.594666666666667	0.630482089052561	0.716767103863878	0.735	0.763642450619351	0.83055654023396
CHEMBL1909103	0.951492537313433	0.898281205973514	0.905430711610487	0.85634328358209	0.95970695970696	0.968164794007491	0.94589552238806	0.918850380388842	0.955056179775281	0.837686567164179	0.903071287686672	0.960205992509363	0.925373134328358	0.935193012116089	0.953651685393258
CHEMBL1738552	0.748737748737749	0.799462984273111	0.80656862745098	0.793510543510544	0.836670502493287	0.812549019607843	0.69022869022869	0.777905638665132	0.784803921568627	0.771049896049896	0.794476409666283	0.775539215686275	0.735818235818236	0.810893747602608	0.793039215686275
CHEMBL1963714	0.741840607210626	0.746199714453683	0.755944055944056	0.686337760910816	0.737381372302007	0.767202797202797	0.670303605313093	0.723188040648358	0.746223776223776	0.683159392789374	0.737675317040396	0.675104895104895	0.67618595825427	0.750986814478878	0.81951048951049
CHEMBL1909102	0.964352941176471	0.969274809160305	0.934240362811791	0.984235294117647	0.976908396946565	0.973733938019652	0.948	0.973473282442748	0.967876039304611	0.941176470588235	0.952290076335878	0.971655328798186	0.96	0.983206106870229	0.967687074829932
CHEMBL1963704	0.738466815297548	0.770679324566182	0.720320855614973	0.772166009260847	0.805618239825695	0.761319073083779	0.700308694906534	0.761185899929967	0.746286393345217	0.680072028811525	0.796513889969652	0.678906714200832	0.687360658549134	0.798848338650689	0.760843731431967
CHEMBL1963785	0.771617566830333	0.754095591960817	0.745876887340302	0.771344789961811	0.805100489782131	0.755555555555556	0.712152209492635	0.748099983110961	0.752226093689508	0.758319694489907	0.766635703428475	0.731087882307395	0.680100927441353	0.769126836682993	0.781339527680991
CHEMBL1963739	0.741346153846154	0.829982363315697	0.750750750750751	0.734065934065934	0.810846560846561	0.784384384384384	0.707417582417582	0.830511463844797	0.753453453453453	0.728571428571429	0.801940035273369	0.664039039039039	0.710576923076923	0.85705467372134	0.756006006006006
CHEMBL2114896	0.652290076335878	0.611896209471595	0.612988152698552	0.696437659033079	0.650392286605539	0.621215445370777	0.685750636132315	0.628934681917005	0.639425186485301	0.621501272264631	0.591667454390774	0.540734240163815	0.693002544529262	0.64131770488704	0.65587977182975
CHEMBL1909143	0.826863538937842	0.893545183714002	0.942163100057837	0.849011669445106	0.925719960278054	0.950645845382687	0.865206001428912	0.938430983118173	0.961634856371698	0.761609907120743	0.920158887785501	0.909388856757278	0.860204810669207	0.952730883813307	0.957200694042799
CHEMBL1963817	0.726485635576545	0.780940594059406	0.702115158636898	0.761904761904762	0.82549504950495	0.706345475910693	0.675455857274039	0.733557284299859	0.723913043478261	0.734225370589007	0.825362446958982	0.707256169212691	0.672176308539945	0.76741513437058	0.731433607520564
CHEMBL1963788	0.779149006897698	0.7275	0.746001031991744	0.791282306989113	0.740196078431373	0.755579205366357	0.766101554059669	0.712712418300653	0.748581011351909	0.765789911077869	0.703104575163399	0.70093201754386	0.779356768885565	0.734673202614379	0.773510061919505
CHEMBL1909124	0.433333333333333	1	0.832731648616125	1	0.940766550522648	0.835138387484958	0.918518518518519	0.979094076655052	0.968712394705174	0.951851851851852	0.905923344947735	0.849578820697954	0.944444444444445	1	0.889290012033694
CHEMBL1964119	0.781471083660865	0.74967917458036	0.72006379585327	0.813194834362718	0.759817257840973	0.7088995215311	0.729253228523302	0.713002412607156	0.724720893141946	0.77877596855699	0.715158359427134	0.68488038277512	0.727961819202695	0.767722396180894	0.724465709728868
CHEMBL1963779	0.781459566074951	0.722753136854392	0.790144435004248	0.789842209072978	0.743872191421068	0.825738943791083	0.762031558185404	0.662459877443828	0.778383937754326	0.775714990138067	0.712631310183834	0.792447346062693	0.752514792899408	0.720126933177706	0.803872467915754
CHEMBL1963768	0.790377727124715	0.768439716312057	0.78146101903008	0.811462064474113	0.826950354609929	0.800798035604665	0.798029957668512	0.802659574468085	0.811540822590546	0.733230218169977	0.829609929078014	0.844843462246777	0.735183979159883	0.817553191489362	0.813075506445672
CHEMBL1909084	0.626865671641791	0.653169014084507	0.613333333333333	0.772388059701493	0.875	0.507878787878788	0.414179104477612	0.871478873239437	0.64	0.873134328358209	0.683098591549296	0.509090909090909	0.794776119402985	0.762323943661972	0.419393939393939
CHEMBL1909209	0.807450980392157	0.917309269893355	0.901930738584125	0.909542483660131	0.906152584085316	0.9414649095924	0.85359477124183	0.880885972108286	0.891817346000613	0.906143790849673	0.91681706316653	0.916794361017469	0.834771241830065	0.914684167350287	0.920625191541526
CHEMBL1963749	0.72375274122807	0.696085626911315	0.669714017815284	0.67016173245614	0.687951070336391	0.746718237224566	0.613692434210526	0.686788990825688	0.706282231598687	0.606051260964912	0.634770642201835	0.665582512892639	0.625411184210526	0.744770642201835	0.740975152367557
CHEMBL1963792	0.757575757575758	0.763500482160077	0.703908127837621	0.758925892589259	0.797492767598843	0.647556307308822	0.774977497749775	0.710342333654773	0.69518383334817	0.685718571857186	0.848481195756991	0.727588355737559	0.771077107710771	0.775433944069431	0.722692068013888
CHEMBL1963826	0.820349650349651	0.780525611216797	0.78916060806345	0.835104895104895	0.810540407243007	0.751607282340924	0.81	0.750228986119918	0.755272486931443	0.832307692307692	0.813781441555697	0.726040978189028	0.804055944055944	0.807510744733319	0.785074806224839
CHEMBL1909165	0.849509803921569	0.788647342995169	0.968984962406015	0.916666666666667	0.853864734299517	0.934210526315789	0.897058823529412	0.758454106280193	0.979323308270677	0.971078431372549	0.821859903381642	0.955827067669173	0.97156862745098	0.868961352657005	0.971804511278196
CHEMBL1909211	0.891635793673411	0.933223864258347	0.930980567344204	0.936876603020804	0.958675424192666	0.939356712083985	0.904816186947848	0.913793103448276	0.919030600848783	0.927899686520376	0.923508483853311	0.914563323654233	0.897834140780849	0.956075533661741	0.930087111905294
CHEMBL1909214	0.653992395437262	0.536130536130536	0.686988847583643	0.847908745247148	0.792540792540793	0.727881040892193	0.503802281368821	0.792540792540793	0.902602230483271	0.849809885931559	0.846153846153846	0.903717472118959	0.720532319391635	0.653846153846154	0.854275092936803
CHEMBL1909184	0.821561338289963	0.705263157894737	0.590909090909091	0.695167286245353	0.642105263157895	0.506363636363636	0.799256505576208	0.86140350877193	0.885454545454545	0.401486988847584	0.539473684210526	0.777272727272727	0.847583643122677	0.682456140350877	0.833636363636364
CHEMBL2354308	0.550505050505051	0.595727332028702	0.530398322851153	0.603934077618288	0.677266797129811	0.590932914046122	0.618022328548644	0.524624918460535	0.561058700209644	0.531233386496544	0.489236790606654	0.571671907756813	0.662413609782031	0.542400521852577	0.622772536687631
CHEMBL1909181	0.302238805970149	0.833333333333333	0.63510101010101	0.742537313432836	0.836309523809524	0.804608585858586	0.966417910447761	0.744047619047619	0.657512626262626	0.492537313432836	0.805952380952381	0.74905303030303	0.921641791044776	0.866666666666667	0.644886363636364
CHEMBL1909141	0.834471544715447	0.931478405315615	0.94147957305852	0.886666666666667	0.925387596899225	0.947981842718685	0.843739837398374	0.941029900332226	0.963194700036805	0.891219512195122	0.891749723145072	0.939271255060729	0.850894308943089	0.949612403100775	0.954974849711692
CHEMBL1909171	0.934051997463538	0.948529411764706	0.946013289036545	0.935320228281547	0.968290441176471	0.959579180509413	0.946311562037624	0.929227941176471	0.958471760797342	0.930247305009512	0.849494485294118	0.951365817644887	0.961530331853731	0.923023897058824	0.976744186046512
CHEMBL1909150	0.953197945845005	0.994718309859155	0.970288461538462	0.993464052287582	1	0.967692307692308	0.996732026143791	0.999119718309859	0.958653846153846	0.992296918767507	0.990316901408451	0.982307692307692	0.997198879551821	0.996478873239437	0.980576923076923
CHEMBL1909131	0.913814955640051	0.927832167832168	0.938339438339438	0.961977186311787	0.946853146853147	0.967032967032967	0.894169835234474	0.946293706293706	0.876678876678877	0.894486692015209	0.913146853146853	0.95970695970696	0.927756653992395	0.935944055944056	0.931623931623932
CHEMBL1963699	0.800206209187765	0.805231560891938	0.78547663821785	0.770764119601329	0.832332761578045	0.754665123680023	0.773971818077672	0.827101200686106	0.792130768118038	0.679459273685416	0.816981132075472	0.707652249385216	0.740634666055676	0.850428816466552	0.772457688413135
CHEMBL1909106	0.907992565055762	0.936842105263158	0.936739659367397	0.981412639405205	0.98859649122807	0.905109489051095	0.810408921933085	0.974561403508772	0.944038929440389	0.979553903345725	0.949122807017544	0.967761557177616	0.871747211895911	0.957894736842105	0.967153284671533
CHEMBL1909105	0.856324404761905	0.92553865652725	0.914184397163121	0.884970238095238	0.942648922686945	0.904863221884498	0.863690476190476	0.90415082382763	0.896352583586626	0.866145833333333	0.946609632446134	0.891388044579534	0.861309523809524	0.95009505703422	0.912867274569402
CHEMBL1909142	0.9182156133829	0.947735191637631	0.875153751537515	0.936802973977695	0.975609756097561	0.83210332103321	0.955390334572491	0.993031358885017	0.960024600246002	0.862453531598513	0.993031358885017	0.856088560885609	0.907063197026022	0.989547038327526	0.935424354243543
CHEMBL1963829	0.740205223880597	0.732259825327511	0.801249362570117	0.798196517412935	0.802811135371179	0.799974502804692	0.733364427860697	0.750136462882096	0.740311065782764	0.782649253731343	0.781113537117904	0.774031106578276	0.749067164179104	0.755731441048035	0.726670066292708
CHEMBL1963781	0.749576414774653	0.570903361344538	0.703296703296703	0.680447305997967	0.655724789915966	0.827838827838828	0.640799728905456	0.636292016806723	0.759573759573759	0.711284310403253	0.692752100840336	0.743423243423244	0.730260928498814	0.641281512605042	0.783216783216783
CHEMBL1909091	0.919318181818182	0.98293403347555	0.837566137566138	0.987878787878788	0.989169675090253	0.968253968253968	0.976515151515151	0.98490318345914	0.933333333333333	0.976515151515152	0.946176567115195	0.975132275132275	0.981818181818182	0.910075484082704	0.964550264550264
CHEMBL1909145	0.872623574144487	0.971830985915493	0.985871271585557	0.987506789788159	0.97887323943662	0.990057561486133	0.98261814231396	0.973004694835681	0.983254840397698	0.964149918522542	0.977699530516432	0.95839874411303	0.980445410103205	0.983568075117371	0.97331240188383
CHEMBL1963691	0.660790598290598	0.744269682395251	0.729696011976546	0.734134615384615	0.785909268165865	0.757225433526012	0.692681623931624	0.754798734780536	0.734644654218822	0.699759615384615	0.779084882360588	0.748097475776604	0.703685897435897	0.771913861085836	0.712687653345532
CHEMBL1909090	0.831474103585657	0.955947922240057	0.89586191129401	0.885059760956175	0.942928482254325	0.892775491540924	0.852191235059761	0.917067950775816	0.924554183813443	0.856274900398406	0.901908328874621	0.879858253315043	0.858366533864542	0.948635634028892	0.916323731138546
CHEMBL1909205	0.938636363636364	0.794306049822064	0.955882352941176	0.986363636363636	0.855160142348754	1	0.884848484848485	0.769039145907473	0.988970588235294	0.868939393939394	0.743060498220641	0.665441176470588	0.926515151515152	0.716370106761566	0.992647058823529
CHEMBL1909121	0.948540379288302	0.975877192982456	0.95639701663798	0.97933091838909	0.973285486443381	0.965002868617326	0.935009588749201	0.964712918660287	0.96423790399694	0.92563392286384	0.92902711323764	0.960221839739912	0.946942254421479	0.993620414673046	0.962707974756168
CHEMBL1963719	0.789320685434517	0.802198024611399	0.780904615956162	0.79141166870665	0.784326424870466	0.747376242221603	0.808853529171767	0.750526230569948	0.773149438097892	0.783659730722154	0.765847636010363	0.713011981053218	0.800744594043248	0.817195595854922	0.772870808953283
CHEMBL1963703	0.755357142857143	0.785623678646934	0.702214452214452	0.736180124223603	0.796405919661734	0.818681318681319	0.77554347826087	0.807470049330514	0.774891774891775	0.73167701863354	0.766243833685694	0.78946053946054	0.772282608695652	0.828118393234672	0.789460539460539
CHEMBL1909148	0.715277777777778	0.444444444444444	0.737362637362637	0.974747474747475	0.625	0.817582417582418	0.618055555555556	0.277777777777778	0.698168498168498	0.983585858585859	0.704861111111111	0.73992673992674	0.792929292929293	0.159722222222222	0.683516483516484
CHEMBL1738578	0.628402903811252	0.598709677419355	0.678376906318083	0.680580762250454	0.712831541218638	0.741938997821351	0.61070780399274	0.6584229390681	0.64760348583878	0.606775559588627	0.645591397849462	0.705936819172113	0.563067150635209	0.666953405017921	0.633442265795207
CHEMBL1963837	0.769185079591352	0.77959321380374	0.801362179487179	0.812603943929675	0.803595527279738	0.834615384615385	0.795557139463055	0.793064391748602	0.800721153846154	0.798467569493941	0.771568343936765	0.806770833333333	0.79104300308862	0.810535955272798	0.782572115384615
CHEMBL1909138	0.90567066521265	0.852023888520239	0.87218045112782	0.929661941112323	0.897478433974784	0.904135338345865	0.910577971646674	0.810882548108826	0.926691729323308	0.914940021810251	0.798274717982747	0.918098818474758	0.929661941112323	0.88885202388852	0.945488721804511
CHEMBL1738682	0.50533350748868	0.512715033657442	0.432614432614433	0.47979797979798	0.557965594614809	0.521749021749022	0.510449320794148	0.544502617801047	0.559059059059059	0.525970916057123	0.533698994431979	0.523068523068523	0.541884360849878	0.515997673065736	0.555009555009555
CHEMBL1963740	0.751056473300039	0.751048591326369	0.682996683750377	0.771897810218978	0.776471984805318	0.713898100693398	0.703611217825586	0.727524533080089	0.722791679228218	0.731151555897042	0.748476574865464	0.693322279167923	0.676527084133692	0.751820196264641	0.739222188724751
CHEMBL1963722	0.763146434403919	0.832781456953642	0.806881720430108	0.77550353837779	0.87690173617326	0.867956989247312	0.787915078933043	0.846787184535529	0.888233486943164	0.757376156777354	0.825778593162699	0.835360983102919	0.77408818726184	0.857078933237874	0.895975422427035
CHEMBL1963832	0.852972668357284	0.800065876152833	0.76340594888982	0.878388278388278	0.813091388190202	0.80671344784248	0.873372781065089	0.805785123966942	0.802524088814411	0.856917441532826	0.809198706431908	0.798229995810641	0.87207664130741	0.834231644508324	0.827398408043569
CHEMBL1963775	0.810098406747891	0.729714912280702	0.702558635394456	0.786551077788191	0.761992872807018	0.715884861407249	0.746719775070291	0.666666666666667	0.680836886993603	0.71520618556701	0.739788925438597	0.668809968017057	0.676136363636364	0.722930372807018	0.686167377398721
CHEMBL1909092	0.868235930735931	0.97331740342493	0.913745387453875	0.888528138528139	0.97610513739546	0.969557195571956	0.936147186147186	0.943448825169255	0.944188191881919	0.941017316017316	0.934289127837515	0.976014760147601	0.911796536796537	0.949820788530466	0.95479704797048
CHEMBL1909157	0.921707421707422	0.896739130434783	0.973384030418251	0.884598884598885	0.923913043478261	0.967853439336329	0.861003861003861	0.91304347826087	0.930867611475977	0.918489918489919	0.890579710144928	0.97096439681991	0.862290862290862	0.88731884057971	0.935706878672658
CHEMBL1909134	0.634505703422053	0.772363636363637	0.838582677165354	0.718155893536122	0.827636363636364	0.78042233357194	0.696292775665399	0.824727272727273	0.847351467430208	0.78041825095057	0.724727272727273	0.799391553328561	0.631653992395437	0.861454545454545	0.810307802433787
CHEMBL1909111	0.951212211912601	0.935324675324675	0.940664961636829	0.938042502244837	0.924155844155844	0.931287297527707	0.905716851242143	0.928311688311688	0.910997442455243	0.874588446572882	0.933766233766234	0.924126172208014	0.911703082909309	0.938961038961039	0.935208866155158
CHEMBL1909108	0.897349453615438	0.872463099630996	0.909800796812749	0.942338990932341	0.899215867158672	0.906135458167331	0.922343641013718	0.823339483394834	0.925737051792829	0.936758893280632	0.866466789667897	0.88191235059761	0.912345966054406	0.895987084870849	0.932589641434263
CHEMBL1909085	0.877604166666667	0.889002383384406	0.939	0.93328373015873	0.918624446714334	0.946857142857143	0.888888888888889	0.871127000340484	0.942	0.915426587301587	0.898535921007831	0.929571428571428	0.865079365079365	0.920497105890364	0.943714285714286
CHEMBL1909086	0.915473684210526	0.958120531154239	0.93239625167336	0.939368421052632	0.972591079332652	0.961178045515395	0.903157894736842	0.952502553626149	0.944042838018742	0.94	0.959312223357167	0.956224899598394	0.893473684210526	0.96407899216888	0.945515394912985
CHEMBL1909112	0.95536959553696	0.930603747397641	0.947766230260494	0.983462841203427	0.95558639833449	0.958293966797139	0.919107391910739	0.947432338653713	0.956539344041031	0.906754333532576	0.912560721721027	0.923741395599946	0.917314206017135	0.96148507980569	0.959103792684573
CHEMBL1909159	0.827746183777312	0.940740740740741	0.919385655496767	0.880873989823406	0.925925925925926	0.936507936507936	0.855133193654595	0.930065359477124	0.91710758377425	0.931756958994313	0.893899782135076	0.916372721928277	0.856629751571386	0.934640522875817	0.933862433862434
CHEMBL2114931	0.759862778730703	0.62042042042042	0.61320268179474	0.873756432246998	0.816816816816817	0.859721505930892	0.761921097770154	0.860660660660661	0.499742135121196	0.770497427101201	0.881081081081081	0.682310469314079	0.763636363636364	0.784984984984985	0.636410520887055
CHEMBL1964102	0.746031746031746	0.829572661974897	0.695714285714286	0.707989713576306	0.841108612058333	0.746587301587302	0.811740711182052	0.834070956975985	0.781349206349206	0.724926842245278	0.811724588260901	0.711825396825397	0.784871863084154	0.878691141260974	0.780555555555556
CHEMBL1614063	0.844251336898396	0.897577092511013	0.78363453815261	0.869652406417112	0.96420704845815	0.96285140562249	0.803810160427808	0.947136563876652	0.967871485943775	0.823529411764706	0.918502202643172	0.979919678714859	0.839237967914438	0.84636563876652	0.981927710843373
CHEMBL1909135	0.921348314606741	0.834971910112359	0.884114583333333	0.692883895131086	0.901919475655431	0.883029513888889	0.853932584269663	0.883426966292135	0.870225694444444	0.531835205992509	0.853464419475655	0.913845486111111	0.741573033707865	0.881788389513109	0.896918402777778
CHEMBL1909110	0.973660580664472	0.897084719233027	0.944328824141519	0.97395989224783	0.895910780669145	0.931711758584807	0.96348398683029	0.911367638426922	0.911160249739854	0.953606704579467	0.905106632752886	0.914932362122789	0.9583956899132	0.90588925846214	0.940556711758585
CHEMBL1909200	0.972534332084894	0.983163265306122	0.975840336134454	0.951310861423221	0.976530612244898	0.912289915966387	0.774032459425718	0.990816326530612	0.868697478991597	0.908239700374532	0.964030612244898	0.816701680672269	0.873907615480649	0.848979591836735	0.890756302521008
CHEMBL1909190	0.825954198473282	1	0.985660377358491	0.887786259541985	1	0.980377358490566	0.748854961832061	0.99644128113879	0.890566037735849	0.903053435114504	0.99288256227758	0.909433962264151	0.780152671755725	0.99644128113879	0.945660377358491
CHEMBL1963693	0.675940124132895	0.75454806312769	0.778548148148148	0.697699890470975	0.721836441893831	0.774874074074074	0.681270536692223	0.699454806312769	0.764503703703704	0.703541438481198	0.683959827833572	0.737540740740741	0.682073749543629	0.724878048780488	0.740266666666667
CHEMBL1963918	0.788707204905468	0.749927546732358	0.665252770083102	0.79368932038835	0.818540791189683	0.76269621421976	0.806336228921819	0.746196203448776	0.696618190212373	0.764499233520695	0.773474858716128	0.728560710987996	0.807933060807358	0.820460802782205	0.716585872576177
CHEMBL1909094	0.904202279202279	0.933523585697499	0.952096724823998	0.918981481481482	0.938559677690113	0.959289868380777	0.893162393162393	0.936041631693806	0.938475665748393	0.866542022792023	0.900621118012422	0.943985307621671	0.928596866096866	0.953332214201779	0.946127946127946
CHEMBL1963823	0.800385147740266	0.750297619047619	0.725947521865889	0.841728350484444	0.767526455026455	0.749789439585358	0.745441415417945	0.723412698412699	0.766180758017493	0.810976710597581	0.777744708994709	0.692808551992225	0.712523319492086	0.790873015873016	0.828701004211208
CHEMBL2114932	0.401223776223776	0.552631578947368	0.520011947431302	0.496212121212121	0.489697120158888	0.517921146953405	0.629224941724942	0.531094836146971	0.569295101553166	0.505244755244755	0.58006454816286	0.446087216248507	0.615238927738928	0.579443892750745	0.566457586618877
CHEMBL1909156	0.910314685314685	0.970457079152731	0.95	0.90979020979021	0.993589743589744	0.969771241830065	0.903146853146853	0.988573021181717	0.95702614379085	0.901398601398602	0.982441471571906	0.942647058823529	0.901748251748252	0.986064659977703	0.969117647058824
CHEMBL1909132	0.745454545454545	0.857664233576642	0.7264631043257	0.840909090909091	0.880474452554745	0.716793893129771	0.766666666666667	0.831204379562044	0.73765903307888	0.848484848484849	0.774330900243309	0.603944020356234	0.785606060606061	0.768856447688564	0.782697201017812
CHEMBL1909130	0.903813318155948	0.910787931408726	0.821776155717762	0.946499715424018	0.930323420881268	0.863138686131387	0.916050085372795	0.874755806381593	0.795012165450122	0.926294820717131	0.849468200564359	0.812652068126521	0.957029026750142	0.905795528543521	0.854622871046229
CHEMBL3215029	0.832130832130832	0.836564899971556	0.855387044872177	0.912326730508549	0.889470939603679	0.91469519098981	0.788141151777516	0.816464397458993	0.851141171563077	0.877180899908173	0.836197496918555	0.882337167034146	0.826380690017054	0.86152460415284	0.897860675764257
CHEMBL2114818	0.576384142173616	0.586138758782201	0.61268115942029	0.791866028708134	0.427693208430913	0.628260869565217	0.609022556390977	0.611094847775176	0.647705314009662	0.645249487354751	0.645711358313817	0.551811594202899	0.679767600820232	0.579918032786885	0.666304347826087
CHEMBL1909107	0.833333333333333	0.756672597864769	0.88625304136253	0.881086142322097	0.821619217081851	0.861313868613139	0.74063670411985	0.710409252669039	0.706812652068127	0.837078651685393	0.91770462633452	0.877737226277372	0.737827715355805	0.779359430604982	0.840632603406326
CHEMBL1963771	0.798549637409352	0.753412383712063	0.727029654837141	0.807501875468867	0.786373341467134	0.710014584346135	0.764016004001	0.7058487113009	0.738106812973123	0.834633658414604	0.75953179807839	0.678449892353636	0.775668917229307	0.749084947384475	0.733002291825821
CHEMBL1909180	0.759398496240602	0.997340425531915	0.638888888888889	0.921052631578947	0.960106382978723	0.829166666666667	0.859649122807018	0.920212765957447	0.733333333333333	0.630325814536341	0.937943262411348	0.826388888888889	0.93483709273183	0.990248226950355	0.706944444444444
CHEMBL1963725	0.759605911330049	0.796290815823222	0.775602536997886	0.79155524278677	0.794071224228075	0.759492600422833	0.784447572132301	0.710219986189208	0.742452431289641	0.784658691062632	0.759100325540101	0.74877378435518	0.776847290640394	0.752145605208642	0.799788583509514
CHEMBL1963741	0.73944123103787	0.747144340602285	0.725318121983326	0.704627305467642	0.769848012838667	0.759894690653795	0.690439812288552	0.736901727555933	0.727555945590171	0.68353705118411	0.797932596998018	0.728894251864853	0.708392447888246	0.784102709336354	0.758315050460728
CHEMBL1909116	0.871863117870722	0.95442238267148	0.898922686945501	0.930798479087453	0.910198555956679	0.893219264892269	0.941444866920152	0.962093862815884	0.952471482889734	0.905703422053232	0.86687725631769	0.918884664131812	0.961977186311787	0.828971119133574	0.939163498098859
CHEMBL1909109	0.922209369577791	0.957993843925403	0.947974014534244	0.954694428378639	0.962339308346913	0.919621228804228	0.943705417389628	0.948759732029694	0.927769213829553	0.954308849045691	0.980083288068079	0.906738603831755	0.941777520724889	0.9565453557849	0.936908170006606
CHEMBL1963807	0.736793327154773	0.762619684595888	0.776119402985075	0.762221964782206	0.78396930442129	0.749425287356322	0.742527803521779	0.745846240495635	0.760473494595986	0.726685588507878	0.750844832441566	0.726282381197461	0.735287303058387	0.76439735285835	0.771384457025219
CHEMBL1909158	0.988847583643123	0.712543554006969	0.842181818181818	0.996282527881041	0.696864111498258	0.871272727272727	0.985130111524164	0.5	0.837090909090909	0.992565055762082	0.865853658536585	0.741818181818182	0.970260223048327	0.491289198606272	0.789090909090909
CHEMBL1963772	0.747398190045249	0.705719870814211	0.717829457364341	0.742816742081448	0.710904300526942	0.731696813092162	0.692024886877828	0.695775964643889	0.686434108527132	0.697511312217195	0.68691568927418	0.708785529715762	0.71408371040724	0.745410504844467	0.727777777777778
CHEMBL1614302	0.579545454545455	0.594520547945205	0.742204301075269	0.987215909090909	0.715753424657534	0.876881720430108	0.923295454545454	0.852739726027397	0.771505376344086	0.957386363636364	0.882876712328767	0.84247311827957	0.873579545454545	0.717123287671233	0.737096774193548
CHEMBL1909174	0.94688936019795	0.970588235294118	0.962716869693614	0.954754330151997	0.974913494809689	0.97046880767811	0.94079179922234	0.954368512110727	0.966039128829827	0.943973135383528	0.938148788927336	0.953488372093023	0.951042771297278	0.936634948096886	0.976744186046512
CHEMBL1964002	0.826879469736613	0.813597923925668	0.806542134360864	0.907814407814408	0.864292973286876	0.884549338247613	0.881715506715507	0.869973141695703	0.875691070531077	0.863531309959881	0.864710365853658	0.847545652538114	0.891287284144427	0.885362224157956	0.881931646842017
CHEMBL1909203	0.959073359073359	0.868840579710145	0.893432465923172	0.946718146718147	0.957246376811594	0.892193308550186	0.894208494208494	0.792028985507246	0.933705080545229	0.951737451737452	0.77463768115942	0.878562577447336	0.960617760617761	0.791304347826087	0.967781908302354
CHEMBL1909136	0.797742363877822	0.8181592039801	0.805452579548965	0.822310756972112	0.865174129353234	0.840902069817733	0.763612217795485	0.820398009950249	0.808001235712079	0.7933598937583	0.840547263681592	0.852950262588817	0.750863213811421	0.866666666666667	0.852641334569045
CHEMBL1964107	0.752094190310751	0.78349107539859	0.755877545888861	0.81926269060027	0.841961506701391	0.787528287654011	0.795792318085312	0.791558152829829	0.780519235604727	0.813298591005597	0.795067649113892	0.807078199647976	0.806099208646979	0.807787588134409	0.749654262006538
CHEMBL1909210	0.783158396946565	0.923932384341637	0.892986425339367	0.908396946564885	0.959074733096085	0.947058823529412	0.848282442748092	0.837633451957295	0.964705882352941	0.895515267175573	0.927491103202847	0.929638009049774	0.838740458015267	0.877224199288256	0.939366515837104
CHEMBL1794574	0.604678362573099	0.609160305343511	0.598130841121495	0.734502923976608	0.587277353689567	0.561786085150571	0.698830409356725	0.678117048346056	0.557632398753894	0.491228070175439	0.795928753180662	0.787123572170301	0.809356725146199	0.417811704834606	0.671858774662513
CHEMBL1963757	0.785427423981641	0.735057283142389	0.732182461188036	0.812507171543316	0.807659574468085	0.778816759575616	0.795352839931153	0.728183306055647	0.750764251033987	0.785542168674699	0.771129296235679	0.773242222621831	0.778714859437751	0.770081833060556	0.783731942696158
CHEMBL1738239	0.626453169554727	0.604698996655518	0.627742782152231	0.667470936608905	0.59257525083612	0.654120734908136	0.637069532792279	0.651204013377926	0.705406824146982	0.591993858302259	0.590953177257525	0.598175853018373	0.602719894713753	0.636254180602007	0.688005249343832
CHEMBL1963690	0.639206514206514	0.700965130759651	0.678981596789816	0.590566528066528	0.68922097689221	0.75729901757299	0.52707033957034	0.661443199114432	0.704199529541995	0.521439708939709	0.696935104469351	0.701985609519856	0.522869022869023	0.689151791891518	0.685796319357963
CHEMBL1964101	0.692745608327911	0.743553488372093	0.709629360465116	0.760518325742789	0.739162790697674	0.711591569767442	0.652678377792236	0.664186046511628	0.653125	0.756641726306658	0.674195348837209	0.725890261627907	0.663034049013229	0.711181395348837	0.695603197674419
CHEMBL1963715	0.671258278145695	0.733364661654135	0.695106958446029	0.638304635761589	0.801785714285714	0.700762232603885	0.665483443708609	0.76875	0.754979100073765	0.675470198675497	0.772838345864662	0.708589459880338	0.695841059602649	0.787171052631579	0.7735636423244
CHEMBL1909191	0.918249189439555	0.958037825059102	0.949291497975708	0.978809634089856	0.997635933806146	0.954251012145749	0.969314497452524	0.992316784869976	0.941093117408907	0.956113941639648	0.971631205673759	0.960728744939271	0.976030569708198	0.991725768321513	0.966599190283401
CHEMBL1909201	0.978383458646616	0.98220640569395	0.88971807628524	0.925281954887218	0.965599051008304	0.919983416252073	0.695018796992481	0.997034400948992	0.944029850746269	0.890037593984963	0.921708185053381	0.952321724709784	0.780545112781955	0.818505338078292	0.956053067993366
CHEMBL1909186	0.721189591078067	0.574912891986063	0.909747292418773	0.986988847583643	0.463414634146341	0.916967509025271	0.377323420074349	0.616724738675958	0.530685920577617	0.760223048327138	0.726480836236934	0.0361010830324909	0.561338289962825	0.871080139372822	0.415162454873646
CHEMBL1963746	0.64834012813046	0.725777860708121	0.772390572390572	0.64729178800233	0.763026542893129	0.803619528619529	0.650728013977868	0.709147735224145	0.806271043771044	0.6296447291788	0.767668050566777	0.75128367003367	0.633313919627257	0.737276671176004	0.818181818181818
CHEMBL1963913	0.586922838549737	0.471339779005525	0.629771784232365	0.709947319491788	0.771639042357274	0.814315352697095	0.711496746203905	0.596685082872928	0.794813278008299	0.687325689494887	0.639963167587477	0.770954356846473	0.750232414006818	0.729742173112339	0.798651452282158
CHEMBL1963701	0.652631578947368	0.685915492957746	0.694498248506079	0.688459099556119	0.742723004694836	0.74984545641871	0.702980342422321	0.695446009389671	0.752276942097672	0.685795814838301	0.705962441314554	0.664949515763445	0.713696892834496	0.691032863849765	0.751411498042448
CHEMBL1963718	0.862934362934363	0.859832015810277	0.784868364999574	0.879902458849827	0.865513833992095	0.766465025134191	0.850436903068482	0.81304347826087	0.799480276050098	0.869487908961593	0.835696640316205	0.776433500894607	0.855517171306645	0.879001976284585	0.805273920081793
CHEMBL1963726	0.728019509690669	0.759315021543283	0.768544518544519	0.740084713130535	0.806330787309048	0.773985023985024	0.671961237325119	0.74189678809244	0.758716508716509	0.776023616993967	0.78281678417548	0.758307008307008	0.705236811705814	0.787211124167646	0.768749268749269
CHEMBL1963750	0.761237522475045	0.730279126213592	0.718681318681319	0.743133486266973	0.723503236245955	0.722652785810681	0.675801351602703	0.688915857605178	0.705957200694043	0.668826337652675	0.710583535598705	0.643628301523038	0.627131254262508	0.731998381877023	0.71933680354733
CHEMBL1737966	0.587864854058377	0.546392849542456	0.584711470795215	0.649940023990404	0.566450308576293	0.590429275158339	0.645275223244036	0.592945307512237	0.534570724841661	0.626849260295882	0.545381996169398	0.607626671358198	0.606690657070505	0.543945520323473	0.55445109078114
CHEMBL1964015	0.894852135815991	0.847710108778494	0.795237059591127	0.899809765377299	0.850481535370332	0.868149195302305	0.889779212543956	0.832155477031802	0.877718573292736	0.885859226379201	0.804545139610615	0.847379295345803	0.887530985184758	0.872652948105037	0.862494562853415
CHEMBL1614004	0.710664152524618	0.738889811278986	0.717718631178707	0.80222082547664	0.851845702584537	0.731102661596958	0.759166142887073	0.815927832198794	0.687604562737643	0.741776660381312	0.800265648347999	0.720912547528517	0.738791116698093	0.828878189163761	0.661673003802281
CHEMBL1909123	0.511111111111111	0.553216374269006	0.523636363636364	0.133333333333333	0.908771929824561	0.460606060606061	0.962962962962963	0.888888888888889	0.861818181818182	0.922222222222222	0.785964912280702	0.861818181818182	0.818518518518519	0.864327485380117	0.823030303030303
CHEMBL1614041	0.874430848036426	0.903491404288198	0.885273398188527	0.967202618099033	0.959049642650183	0.948051948051948	0.960194934547524	0.95755263666216	0.926486797335506	0.954894706886739	0.941628839096001	0.926103416878325	0.967273762094479	0.952409696735561	0.920448555134902
CHEMBL1909173	0.887619047619048	0.960856401384083	0.958509993943065	0.895619047619048	0.956531141868512	0.963658388855239	0.904190476190476	0.937283737024221	0.960024227740763	0.86647619047619	0.879108996539792	0.94473046638401	0.913142857142857	0.929498269896194	0.977286493034525
CHEMBL1614175	0.737839673913044	0.767865219357757	0.733908045977011	0.821059782608696	0.90479421076436	0.815287356321839	0.854211956521739	0.816146540027137	0.789310344827586	0.860869565217391	0.864540931705111	0.839310344827586	0.885326086956522	0.849163274536409	0.783333333333333
CHEMBL1963830	0.690432098765432	0.724017199017199	0.668232765238753	0.721836419753086	0.784520884520885	0.706218332565638	0.689216820987654	0.696898034398034	0.691539996929218	0.714621913580247	0.761701474201474	0.686688162137264	0.71923225308642	0.746560196560197	0.680915092891141
CHEMBL1909169	0.713688212927757	0.932624113475177	0.911355311355311	0.833460076045627	0.944148936170213	0.926739926739927	0.726235741444867	0.893617021276596	0.803663003663004	0.8	0.932624113475177	0.895970695970696	0.67680608365019	0.915780141843972	0.871794871794872
CHEMBL1963723	0.792757242757243	0.727280663465735	0.770582684595423	0.811638361638362	0.790571802706242	0.833156404812456	0.786413586413586	0.741422959406373	0.786152394432649	0.802722277722278	0.742317765168049	0.792197452229299	0.7999000999001	0.756176342208642	0.816407171502713
CHEMBL1963972	0.611188811188811	0.559758771929825	0.598814613291877	0.638601398601399	0.657595693779904	0.624174115818111	0.564009324009324	0.579512227538543	0.578021764477264	0.628904428904429	0.601990297713982	0.622182277497085	0.59995337995338	0.59934875066454	0.621259230470268
CHEMBL1614432	0.559199421268387	0.705299439896596	0.631785345717234	0.498191463708705	0.715962947005601	0.773374613003096	0.621895346033277	0.72856527358897	0.778740970072239	0.5983240897034	0.820228349849203	0.617956656346749	0.563178201109236	0.81042654028436	0.745098039215686
CHEMBL1964095	0.866041666666667	0.821044685990338	0.815220995783789	0.864739583333333	0.832185990338164	0.859349092804017	0.8553125	0.804951690821256	0.821687431901085	0.819739583333333	0.828411835748792	0.807475484390544	0.839583333333333	0.861262077294686	0.82803543512246
CHEMBL1614524	0.661492178098676	0.689727463312369	0.698623767900316	0.785679903730445	0.798667265648398	0.79691277664125	0.797472924187726	0.787935509633623	0.78817184303515	0.762334536702768	0.767919536787461	0.735493769760089	0.810228640192539	0.806254367575122	0.807792449321183
CHEMBL2114812	0.7065	0.75	0.652482269503546	0.6305	0.757367387033399	0.797872340425532	0.64675	0.904715127701375	0.647163120567376	0.578	0.613948919449902	0.374468085106383	0.64625	0.680746561886051	0.586524822695035
CHEMBL1738500	0.660199295648928	0.673115305656934	0.661730469965764	0.753136309784637	0.778854927007299	0.752854030501089	0.728240582956002	0.741004219890511	0.776545284780579	0.741938101497963	0.735848159975669	0.723423591658886	0.755083824269276	0.765145034975669	0.750513538748833
CHEMBL1964104	0.782796913231696	0.722238457042665	0.725117096018735	0.831592320722755	0.716588739528541	0.728211776513884	0.810088462262375	0.728326514708747	0.718216794914687	0.841897233201581	0.731833235924411	0.687290899966544	0.786655373611895	0.72822910578609	0.71867681498829
CHEMBL3215245	0.875828279424978	0.879266298794196	0.833655050966846	0.900915318957772	0.927779480891069	0.879745335094314	0.829935983827493	0.86020846106683	0.852687188865183	0.825612084456424	0.857040670345391	0.840411121270615	0.857788634321653	0.890736766809728	0.864031968573267
CHEMBL2114934	0.834983498349835	0.697281167108753	0.720921155347385	0.842853516120843	0.729885057471265	0.711065573770492	0.775450621985275	0.677829354553492	0.69847775175644	0.861640010154862	0.775198938992043	0.649785323965652	0.747524752475248	0.787135278514589	0.739754098360656
CHEMBL3214915	0.844486438417074	0.902710723302476	0.813916666666667	0.890117830146732	0.90813659919387	0.849958333333333	0.846820809248555	0.89750631173318	0.835541666666667	0.826923076923077	0.84140939894583	0.812833333333333	0.85899288572699	0.903663019887496	0.841125
CHEMBL1963742	0.733479552851281	0.817542016806723	0.72068669527897	0.758808546766662	0.761817226890756	0.780314735336195	0.738998160464129	0.729411764705882	0.738483547925608	0.724635630394793	0.754385504201681	0.724921316165951	0.720036790717419	0.800420168067227	0.752732474964235
CHEMBL1909212	0.821882951653944	0.783333333333333	0.897761194029851	0.921119592875318	0.84047619047619	0.8	0.797709923664122	0.85297619047619	0.802238805970149	0.856234096692112	0.875	0.81865671641791	0.916030534351145	0.777380952380952	0.788059701492537
CHEMBL2114916	0.875714285714286	0.861831550802139	0.864468864468865	0.954285714285714	0.954188948306595	0.967817896389325	0.930571428571428	0.939015151515152	0.935766614338043	0.959428571428571	0.950935828877005	0.954604918890633	0.942476190476191	0.944385026737968	0.950549450549451
CHEMBL1614499	0.654390243902439	0.624348673815847	0.722715053763441	0.705907859078591	0.727670017144586	0.682956989247312	0.696585365853658	0.732947860288432	0.681827956989247	0.693875338753387	0.688237469324638	0.717849462365591	0.696043360433604	0.738360170773523	0.675483870967742
CHEMBL1613870	0.553732446415373	0.568375354817165	0.540817120622568	0.526385809312639	0.60516502476763	0.476186770428016	0.533333333333333	0.571714810485891	0.519066147859922	0.495084996304509	0.614710302220738	0.517237354085603	0.52860310421286	0.580397395224579	0.516575875486381
CHEMBL1614019	0.821865613527645	0.717675305416284	0.808630952380953	0.854349760818778	0.789156839206271	0.815638528138528	0.806430081210368	0.797877974719299	0.840097402597403	0.837885193013683	0.777575736176824	0.812418831168831	0.820030036711536	0.751941953251889	0.858658008658009
CHEMBL3215183	0.877611359657654	0.857925688318631	0.887875611460517	0.907352655125462	0.896707653924975	0.91298392732355	0.885113142708941	0.877127327808964	0.894689028651293	0.87475199377553	0.831116902788916	0.890188679245283	0.89172664202814	0.896618551189521	0.909713487071978
CHEMBL1963782	0.73497580850522	0.695324143070045	0.74863213811421	0.738095238095238	0.732162816691505	0.811420982735724	0.729246243952126	0.723127794336811	0.800212483399734	0.707442067736185	0.720100596125186	0.760956175298805	0.743442831678126	0.721870342771982	0.775776892430279
CHEMBL1614169	0.554517133956386	0.838675958188153	0.497644287396938	0.909968847352025	0.828919860627178	0.84982332155477	0.875700934579439	0.86794425087108	0.872202591283863	0.855763239875389	0.779790940766551	0.793875147232038	0.925856697819315	0.843554006968641	0.810365135453475
CHEMBL2114734	0.793650793650794	0.631201044386423	0.801851851851852	0.797258297258297	0.739773716275022	0.830864197530864	0.876984126984127	0.787859007832898	0.727777777777778	0.845959595959596	0.751523063533507	0.846296296296296	0.862914862914863	0.700174064403829	0.675
CHEMBL1963814	0.73062188168211	0.807219959925021	0.750523450586265	0.745010691375624	0.833527244522009	0.773764656616415	0.755568424803991	0.817594208519165	0.790026521496371	0.7214005702067	0.775224613793549	0.714126186487996	0.735789379900214	0.840055587874087	0.799588218872138
CHEMBL1963999	0.60188679245283	0.484342379958246	0.442264573991031	0.457075471698113	0.584930726893149	0.589686098654709	0.465330188679245	0.472195862592522	0.519618834080718	0.447877358490566	0.408996014423989	0.384529147982063	0.501179245283019	0.435186942493832	0.630044843049327
CHEMBL2114716	0.757406223358909	0.766844237695078	0.758439781021898	0.875532821824382	0.827130852340936	0.888001824817518	0.841538789428815	0.844087635054022	0.849908759124088	0.844948849104859	0.811974789915966	0.872376824817518	0.845055413469736	0.851365546218487	0.868042883211679
CHEMBL1614529	0.648946886446886	0.723	0.748134092346616	0.754578754578755	0.796983606557377	0.752624920936116	0.726739926739927	0.807409836065574	0.74000632511069	0.712751831501832	0.783475409836066	0.744275774826059	0.728617216117216	0.813049180327869	0.737128399746996
CHEMBL3215004	0.689108236895847	0.695087947882736	0.655066016073479	0.737746766507829	0.729237785016287	0.688361079219288	0.673723621511232	0.700599348534202	0.680683122847302	0.663019060585432	0.647895765472313	0.658420637198622	0.668311776718856	0.686553745928339	0.671785304247991
CHEMBL2114714	0.769752052937894	0.769669551534225	0.793443451879319	0.843657817109145	0.832893110037091	0.832687229619641	0.864266921789046	0.818871529729122	0.80223608067869	0.848162321613649	0.809261548836687	0.794904208101579	0.854699832575939	0.818281443183095	0.826057643687848
CHEMBL1614122	0.680576131687243	0.685986232684626	0.713815591753321	0.712090534979424	0.77404322823716	0.784245957804893	0.693473251028807	0.736013144103566	0.763058243673739	0.674189300411523	0.780105379451007	0.75311805012923	0.707382716049383	0.751182686042888	0.769174129951313
CHEMBL1794366	0.58075832842188	0.572162313678934	0.595617912742648	0.632581179310151	0.590233808204722	0.643304076707882	0.600839156913923	0.576300949742778	0.640485190168065	0.589037635766608	0.593267708745548	0.619129989108847	0.623628301198395	0.613614628676956	0.638050697247315
CHEMBL1613944	0.696231528053963	0.708567001180638	0.711106721969846	0.799235778063711	0.785271546635183	0.815787741128448	0.745837719811284	0.772136953955136	0.785831851998157	0.775158887979101	0.78047520661157	0.774902890249523	0.731411081218076	0.812795159386068	0.782079136216999
CHEMBL1613896	0.605028618803909	0.600787160658656	0.583463477756459	0.661963297779053	0.699251780151313	0.705338152395401	0.652301462030261	0.649560525144637	0.687608763553612	0.619290189888554	0.720856975967957	0.70774024660509	0.660958849508139	0.667069982198487	0.695253818809216
CHEMBL1794523	0.550071661237785	0.497197716658018	0.535632379172683	0.48528990228013	0.483964711987545	0.538987513802769	0.478019543973941	0.50551807645736	0.516499617769473	0.543583061889251	0.476517903476907	0.548723774738809	0.475622149837134	0.521985815602837	0.534889153147031
CHEMBL1794349	0.673751269092167	0.718403380882695	0.680707670298842	0.801519563543863	0.771058714115732	0.776718780481008	0.758041302674298	0.760671252923397	0.711571867829706	0.741417589896353	0.722940629402191	0.730192570297913	0.768115942028986	0.76882257204207	0.744549415229124
CHEMBL1963736	0.747281265447355	0.847554654045526	0.699396929824561	0.707983193277311	0.805859815190444	0.750219298245614	0.722812654473554	0.826279017354068	0.74780701754386	0.668036332179931	0.786590038314176	0.672779605263158	0.7134206623826	0.840793328825783	0.774013157894737
CHEMBL1963835	0.79981007341393	0.850890628545496	0.782531946736252	0.796997698966361	0.861583843884729	0.812003530450132	0.788743197341028	0.850351713183572	0.784987912045742	0.797344680229373	0.851571363739505	0.774665182854292	0.779137295007122	0.859655094168368	0.775125676349821
CHEMBL1614217	0.5695360407266	0.589707225614153	0.673500295508274	0.701415403602144	0.7220085572809	0.775672281323877	0.69304639592734	0.662227777510697	0.713947990543735	0.695244706699063	0.757980385558387	0.747007978723404	0.692043657680589	0.682178741406663	0.719267139479906
CHEMBL1963727	0.779785809906292	0.726976944624003	0.731038647342995	0.730206540447504	0.716311139840552	0.713607085346216	0.685982023331421	0.702650290885585	0.764049919484702	0.702165806081469	0.712842059900883	0.696115136876006	0.672499521897112	0.71096746390864	0.774275362318841
CHEMBL1613820	0.643837325349301	0.613912777975675	0.639097744360902	0.693562874251497	0.694129221583295	0.686165413533834	0.70878243512974	0.629789832578495	0.697774436090225	0.656037924151696	0.652061811951894	0.666406015037594	0.693338323353293	0.675012297932251	0.685112781954887
CHEMBL1614195	0.637133299022131	0.645504608654898	0.670364838916151	0.704837879567679	0.720102327761287	0.72386387881374	0.670779722079259	0.632381659115763	0.664266410639357	0.701042202779207	0.706813388533042	0.712253751511272	0.679850746268657	0.667883924386814	0.671769433183984
CHEMBL1614339	0.67104383535479	0.66863054241695	0.727146357553482	0.742192722758094	0.753575083672171	0.775845820375083	0.744771273039824	0.749066467513069	0.812128922815946	0.724763632890841	0.756119824080989	0.747007822071435	0.74410276000382	0.755538959422455	0.791537084157949
CHEMBL3214953	0.666932397959184	0.654823369565217	0.727104177988045	0.780266794217687	0.816553442028986	0.824153693699453	0.677003613945578	0.761186594202899	0.805964901064476	0.747834289965986	0.787533967391304	0.819342774030624	0.714604591836735	0.765013586956522	0.819646453345267
CHEMBL3214811	0.787903492343285	0.771629818820337	0.765535539729088	0.829591274650215	0.811317742836619	0.834694875017456	0.782350997025449	0.775221486152127	0.790566959921799	0.762939297124601	0.760675233458377	0.748219522413071	0.763842679299328	0.821653763269215	0.785295349811479
CHEMBL1266185	0.567645035542307	0.603105232892467	0.536434612882238	0.551393029121761	0.612880966072456	0.467027604795985	0.527258656271497	0.586486486486486	0.551933265173343	0.519204310937858	0.579672225416906	0.436890045543266	0.612617518917679	0.658194364577343	0.604772748396691
CHEMBL1613924	0.684606959305754	0.594432071269488	0.662197770893423	0.689594742606791	0.687606868309505	0.707367446497881	0.646903698710928	0.673360155183562	0.654648719866111	0.619529867722639	0.660492851497952	0.677242459851155	0.647148032690201	0.677735469502119	0.660702204180465
CHEMBL3215079	0.809972492507288	0.758584457613584	0.748846110548238	0.86866198628731	0.822510822510823	0.817601035686142	0.837705792995853	0.793867944353381	0.833248902397839	0.858623804245186	0.77497583322826	0.79666216368344	0.856345198505563	0.828773168578994	0.837301587301587
CHEMBL1614192	0.841052631578947	0.87320488118176	0.8748883876122	0.921013645224172	0.938715478484265	0.926641289534283	0.895165692007797	0.911046885035324	0.890502373231825	0.904093567251462	0.912061657032755	0.901405141219042	0.898635477582846	0.911085420680796	0.903754875699046
CHEMBL1614285	0.630087329049267	0.643490048270846	0.604826233794531	0.739866534849234	0.706423989949084	0.708443185532193	0.713008732904927	0.709457448918865	0.690096960453209	0.730896770472895	0.674766911327118	0.688223117986709	0.703524056681496	0.685636117172519	0.700642771543741
CHEMBL1614121	0.602023713749377	0.523621885308611	0.601768092105263	0.585679806918745	0.592681863426592	0.623401988636364	0.600802589740643	0.59009879813427	0.637008447966507	0.613904532046125	0.619664201511998	0.590077377392344	0.607937784928935	0.622666809256258	0.631289249401914
CHEMBL1614155	0.667653290129611	0.681774314615577	0.695339721254356	0.750186939182453	0.741215998856203	0.69022212543554	0.706443170488534	0.694034385387997	0.662565331010453	0.7098703888335	0.738499481717125	0.627694904181185	0.686316051844467	0.729170389963184	0.67323606271777
CHEMBL1614201	0.730629207879644	0.780152312497326	0.794387675201629	0.826348599451417	0.809138749839558	0.825189883329418	0.797705926356911	0.805245368587687	0.815871897267246	0.786800764691214	0.818626192615411	0.806788818416725	0.807364308868756	0.825664227955333	0.827754287056613
CHEMBL1963790	0.776916868442292	0.748560855263158	0.801167670133187	0.827320419693301	0.80430794534413	0.852289728151797	0.832929782082324	0.747501265182186	0.824119686188652	0.815415657788539	0.765593370445344	0.795931399379675	0.842453591606134	0.773469129554656	0.852618135376756
CHEMBL1738132	0.719903691813804	0.787824984147115	0.748379125259074	0.855824352212795	0.868072289156626	0.843944305681033	0.832779179087365	0.849762206721623	0.80690333209332	0.819422150882825	0.850348763474952	0.810995376521231	0.816899793625315	0.849571972098922	0.809480788648562
CHEMBL1613794	0.614900202796456	0.56439214447428	0.624759337697343	0.674458319991461	0.646014321065656	0.646361185983827	0.626463158643754	0.616332332964777	0.617731998459761	0.650096061479347	0.617964513241721	0.640017327685791	0.632137901590351	0.633285947454325	0.643261455525606
CHEMBL1614067	0.598120655119595	0.620607937681108	0.605105105105105	0.62889566395664	0.645760743321719	0.645468998410175	0.640818310357017	0.636387099801734	0.655714538067479	0.674045599151644	0.620038949307242	0.647846375787552	0.656437787203959	0.660748014406551	0.66877171288936
CHEMBL1963888	0.747712069602331	0.7598352240002	0.800976395866907	0.815611277547503	0.784827085367991	0.824969191392549	0.802991751138835	0.776863746775849	0.806635700066357	0.7608445848894	0.756304309718779	0.795942743387999	0.808224237698527	0.792277064082338	0.806085884918002
CHEMBL3214967	0.830951845184518	0.834065904433179	0.792755482066418	0.923679867986799	0.895911983604789	0.88428551560013	0.886776177617762	0.866096789271204	0.85041183106427	0.887601260126012	0.86229461043397	0.875724374526742	0.905096759675968	0.891076115485564	0.858478465794069
CHEMBL3215169	0.874292986425339	0.861266094420601	0.87347533632287	0.918382352941176	0.891917024320458	0.912556053811659	0.852828054298643	0.872585836909871	0.883766816143498	0.866713800904977	0.88488912732475	0.881053811659193	0.874151583710407	0.876663090128755	0.900224215246637
CHEMBL1738573	0.541859122401848	0.618264014466546	0.718004338394794	0.676096997690531	0.562025316455696	0.691250903832249	0.572603926096998	0.619710669077758	0.538141720896602	0.696016166281755	0.51500904159132	0.552060737527115	0.59959584295612	0.616998191681736	0.625632682574114
CHEMBL1794310	0.533136094674556	0.514478696388262	0.428295855379189	0.491597633136095	0.494533013544018	0.449404761904762	0.506923076923077	0.546134311512415	0.413414902998236	0.605680473372781	0.457357505643341	0.509038800705467	0.546863905325444	0.548180022573364	0.399856701940035
CHEMBL1613779	0.627522363220304	0.770781637717121	0.672364672364672	0.685909437625685	0.80241935483871	0.805698005698006	0.662610082518549	0.800248138957816	0.786894586894587	0.733756327577838	0.78644540942928	0.818233618233618	0.66853893627349	0.812655086848635	0.792022792022792
CHEMBL1614501	0.661878360215054	0.577526717557252	0.681316348195329	0.657930107526882	0.612213740458015	0.725477707006369	0.643649193548387	0.538076335877863	0.63619957537155	0.668346774193548	0.632854961832061	0.625530785562633	0.677251344086022	0.547908396946565	0.601061571125265
CHEMBL3214913	0.850960702486524	0.88989932332068	0.903601108033241	0.921752738654147	0.910080046212246	0.943188489684541	0.908820205181708	0.885744347252022	0.889291768305288	0.897441749260998	0.894924905099851	0.927262579071402	0.908265953747174	0.917432744677339	0.922350849629966
CHEMBL1614090	0.600767633244051	0.635288128278782	0.645478055747922	0.654215674857343	0.701184070342949	0.710255799861496	0.622831023640387	0.659127995576594	0.698894130886427	0.60917181010054	0.663608717347035	0.695788608033241	0.618706571949847	0.674090706800987	0.688798476454294
CHEMBL2114796	0.829339609185565	0.820862627553831	0.780991674100506	0.894800234552053	0.906552354924735	0.882946773713946	0.866384570278451	0.881173825843563	0.863202497769848	0.901995277262714	0.88660657219051	0.866257805530776	0.887589343729695	0.913660106230578	0.872561700862325
CHEMBL1614554	0.51880684858213	0.583883879056758	0.615544217687075	0.572017121455324	0.648165115494045	0.704897959183673	0.557891920813269	0.616434392631528	0.661428571428571	0.586650615302301	0.664247480349134	0.636258503401361	0.558747993579454	0.658099050007233	0.661156462585034
CHEMBL1614456	0.699693647210577	0.656842105263158	0.6616	0.68381167365366	0.755087719298246	0.5872	0.407368590777169	0.740877192982456	0.5786	0.549661399548533	0.683508771929825	0.4764	0.463560141889713	0.778245614035088	0.605
CHEMBL3215073	0.794311393579008	0.720510733937844	0.730043665979786	0.768991571424675	0.751317523056654	0.745314493180257	0.765841084531246	0.782870262729598	0.764338632126386	0.730565178254821	0.746769162210339	0.717275046609754	0.757917132647773	0.785737812911726	0.763823471690708
CHEMBL1613936	0.643376431152323	0.634505494505494	0.723014354066986	0.723520961211963	0.728640502354788	0.736491228070175	0.663677390332738	0.689664050235479	0.730622009569378	0.6725726640837	0.717450549450549	0.74481658692185	0.658671078025917	0.744992150706436	0.745901116427432
CHEMBL1613803	0.724852071005917	0.659938837920489	0.643377483443708	0.660780325443787	0.737920489296636	0.581125827814569	0.467640532544379	0.706422018348624	0.591887417218543	0.587185650887574	0.66085626911315	0.487748344370861	0.530140532544379	0.764831804281346	0.587913907284768
CHEMBL1738598	0.583494841822623	0.622156892117944	0.639794664794665	0.69507197222054	0.646125134197189	0.692049842049842	0.628288211899138	0.63962125184131	0.611767286767287	0.643681989784588	0.639156242978054	0.66766848016848	0.612864151171946	0.648284772676204	0.631475956475957
CHEMBL1737993	0.671488072699735	0.75843440680329	0.887324625060474	0.748466489965922	0.846925972396487	0.886308659893565	0.677054146156759	0.765021608810818	0.906531204644412	0.747822794396062	0.841419210929876	0.838122883405902	0.669746308216585	0.804056879966541	0.85292694726657
CHEMBL1614027	0.674113323758136	0.743598534503042	0.76015368852459	0.737607235743954	0.8025007562771	0.809979508196721	0.70626140289585	0.780014117172532	0.794651639344262	0.653840430625105	0.76206514066754	0.783545081967213	0.7089786887155	0.791314577661255	0.802151639344262
CHEMBL1613792	0.740934054974135	0.680223796247457	0.736194071903527	0.872923842072368	0.828664004219727	0.842513805928096	0.804332504421601	0.773626704845151	0.818902851346782	0.866228274312158	0.826588049129681	0.839731488786205	0.82696578411947	0.798191545475096	0.824298433449791
CHEMBL1614134	0.694602393730301	0.707417778958772	0.677284020062814	0.764226083993526	0.764916297038203	0.765468991702995	0.767069171138938	0.777766422064605	0.770941733464585	0.77432064059971	0.763812521717801	0.73792949889842	0.777642899735923	0.786453542641839	0.759632963015047
CHEMBL1614158	0.672747429953638	0.809097222222222	0.682407407407407	0.657377544849829	0.78875	0.805555555555555	0.720268091110663	0.790833333333333	0.827222222222222	0.736393872203185	0.832777777777778	0.805555555555556	0.692400725660149	0.816111111111111	0.847962962962963
CHEMBL1794496	0.717366332497911	0.696254432624114	0.713160264105642	0.836831662489557	0.82863475177305	0.847488995598239	0.79344193817878	0.817375886524823	0.837084833933573	0.819470551378446	0.753812056737589	0.872549019607843	0.833803258145363	0.839627659574468	0.81735194077631
CHEMBL1794512	0.690554564988799	0.712986486584298	0.738681420009221	0.824921135646688	0.8349003684161	0.824105907923335	0.740787729163809	0.750548281328035	0.780399130606599	0.797375760069492	0.808416389811739	0.799117433972206	0.760515247108307	0.78510267155958	0.797220575643812
CHEMBL1614120	0.376636455186304	0.422847399829497	0.725720384204909	0.866565961732125	0.868712702472293	0.943436499466382	0.853977844914401	0.965046888320546	0.998932764140875	0.970292044310171	0.958226768968457	0.980789754535752	0.865055387713998	0.938618925831202	0.99786552828175
CHEMBL1794324	0.591284748309542	0.58666311016271	0.612081120811208	0.787296246692582	0.745405441451054	0.741847418474185	0.741670205468265	0.6964590557482	0.696951969519695	0.765557116257799	0.713716991197653	0.738344883448835	0.76116355796557	0.693084822619365	0.697326973269733
CHEMBL1613869	0.590760316432272	0.592001770708995	0.645984162895928	0.653694022945966	0.650118969510605	0.645010055304173	0.590870188749075	0.610578405255211	0.65946455505279	0.638566339748335	0.637629147134851	0.647423328305681	0.601175055514434	0.632850604333494	0.648114630467572
CHEMBL1040693	0.78598729543497	0.854047143926166	0.730500289743094	0.788396317829457	0.779932651534048	0.822001158972378	0.758465223944875	0.780182090296832	0.730017384585667	0.749690460809647	0.749262076993432	0.790477110295538	0.786915913006029	0.80271472520163	0.792485995750435
CHEMBL3215046	0.828026456155323	0.846973094170403	0.862224958949097	0.884267121826328	0.898162881527557	0.898357963875205	0.851350544058033	0.854006943439896	0.86568144499179	0.854525282696821	0.855968826847968	0.861535303776683	0.862189033496906	0.871588552967838	0.874934318555008
CHEMBL1963988	0.707350063312996	0.66954351974167	0.7476973396342	0.81750892137677	0.755753706150007	0.804443423470727	0.757822032922758	0.766013503596066	0.759593506607159	0.751767008173132	0.73193160135036	0.772720311542837	0.774122251640382	0.770776456773815	0.77708497418395
CHEMBL2114924	0.618822701341039	0.634852347567453	0.715415019762846	0.719641401792991	0.738819842787338	0.761706370402023	0.692005630880937	0.70761631612492	0.782252608339565	0.7749129436171	0.712821329934141	0.716447672969412	0.688856782988812	0.731570002124495	0.783214044083609
CHEMBL1794426	0.64308426073132	0.693162496963809	0.64676387350806	0.820446114563761	0.734667233422395	0.801843648742874	0.789083200847907	0.785401991741559	0.79403018744104	0.804535819241701	0.732815156667476	0.741140642303433	0.788830274124392	0.744119909319083	0.770015585907059
CHEMBL1614164	0.622204100652377	0.637899598881731	0.636785114674307	0.733581857719789	0.756188971273449	0.702663154814165	0.677694936315626	0.726358332320408	0.681915499899882	0.66787045666356	0.712364774522912	0.675554117955116	0.695029512270891	0.72245857137069	0.680621659504336
CHEMBL3214845	0.832075697688346	0.813998806919865	0.845982429139412	0.88854204096299	0.866984821369391	0.883256380659228	0.806211821775063	0.849923775435806	0.853854046428113	0.843222242184693	0.800715848081129	0.860908041554444	0.837443106958917	0.872526015775171	0.873797614467103
CHEMBL1614252	0.675393462469734	0.637935297026206	0.651125	0.662681598062954	0.678639542275906	0.734375	0.721953188054883	0.692060464787738	0.6824375	0.661092615012107	0.683389842480751	0.7036875	0.721499192897498	0.691460055096419	0.7023125
CHEMBL1614064	0.823825371039225	0.835198460108854	0.823816684568564	0.90413702821633	0.902326430373025	0.911636233440745	0.87016387237197	0.887992831541219	0.894092373791622	0.88880652335063	0.878743528474711	0.850118152524168	0.88341245682381	0.902548785344484	0.911686358754028
CHEMBL1614213	0.54861620795107	0.55806417526681	0.580099650479661	0.583019877675841	0.563668455183372	0.569569420688629	0.611299694189602	0.58648867598887	0.592109764259686	0.542576452599388	0.592222104814123	0.575481520041645	0.632576452599388	0.59905721296655	0.584085669666097
CHEMBL1614307	0.629721166032953	0.585093896713615	0.563380281690141	0.782319391634981	0.690912139503689	0.693454846727424	0.835012674271229	0.692253521126761	0.719828776581055	0.761977186311787	0.673692152917505	0.63207677437172	0.831337135614702	0.761066398390342	0.731013532173433
CHEMBL1613797	0.556500492037932	0.571409327387588	0.591324602267733	0.571289586688137	0.57858138238573	0.590612639535906	0.549203793165146	0.546251393534002	0.587342884767513	0.521878913938093	0.582743403939056	0.552869825085699	0.548409822866345	0.565333519137867	0.592968269315285
CHEMBL1614110	0.645476813218749	0.678838512149046	0.723257364766799	0.739946859301698	0.77249364862224	0.781482498463631	0.675746253165608	0.734782750309426	0.767092927470286	0.713123261510358	0.759354439450199	0.752840649067064	0.697392784489559	0.771164744967755	0.766890257456295
CHEMBL1794536	0.900136011717933	0.921394792049401	0.885235275907438	0.952688847039129	0.933128681656019	0.924599489203622	0.947604101276418	0.965829491175878	0.914219100688801	0.943691148775895	0.954628960187742	0.904525578515595	0.949822138522703	0.963115288428488	0.92055568454454
CHEMBL1614141	0.716958337647993	0.760932913656654	0.704307016937966	0.776448862655759	0.813995828003333	0.776030514432191	0.766499257878568	0.820933232129682	0.779614578776506	0.729531255393324	0.777148498665067	0.74570411131321	0.752804528666598	0.830763432926926	0.776690534846775
CHEMBL1614153	0.509578081971497	0.492891992477742	0.540964698564097	0.572172304970954	0.603447482279297	0.550809531214902	0.548201973909023	0.570655961915283	0.526057055967377	0.568172224567328	0.57350639786431	0.545146268553557	0.567559146917526	0.584286766349732	0.560563647987835
CHEMBL3215270	0.805915313836639	0.799009900990099	0.825313453066757	0.936373962618956	0.899014114177375	0.922543205692986	0.882943743647994	0.840918474826206	0.882929515418502	0.91156377549634	0.849121550452917	0.890384615384615	0.900775556123198	0.873874025700442	0.898187055235513
CHEMBL1614137	0.597113204256061	0.65351852535924	0.628859696641387	0.701399790685505	0.692578774334158	0.683719302997472	0.644830368044654	0.629197295999409	0.696359245214879	0.620764652014652	0.677994902293968	0.706713840736728	0.640796703296703	0.642015440877692	0.682861592632719
CHEMBL1613777	0.789218316886573	0.747191633513943	0.804245180853368	0.825306575008316	0.785412647571928	0.830474333983106	0.810901430313782	0.762938792840858	0.829402209226771	0.77582658831356	0.746460119811329	0.8091942820013	0.826801197472004	0.777211386691527	0.827247130171107
CHEMBL1738569	0.687847175179515	0.76588430535799	0.780529203869048	0.747087115566996	0.748391248391248	0.874279203869048	0.684714130876575	0.724564790354264	0.81884765625	0.702377726595312	0.747747747747748	0.82621837797619	0.665458609944452	0.758213100318364	0.809454055059524
CHEMBL1614538	0.703855433314032	0.711170773035354	0.670660115202709	0.772090330052113	0.787370912712951	0.755594508548188	0.735273113298591	0.740671940831654	0.722469128986547	0.738848677861417	0.765013910514746	0.727329818362502	0.74982628836132	0.779950540392013	0.744051233920389
CHEMBL1614166	0.711495535714286	0.741016381891844	0.866191840863115	0.905534029649596	0.849744583406729	0.902674758372668	0.858659029649596	0.865128295461218	0.919672960215779	0.879337938005391	0.819725794140097	0.879130141604855	0.86948281671159	0.869766895660854	0.929309957293774
CHEMBL1614263	0.603788965697144	0.639723832026551	0.634194053208138	0.68480619419709	0.722213732381949	0.71027106032421	0.677021947662355	0.686564240009091	0.661551067410754	0.672397642790235	0.715668065531118	0.671741665928485	0.682618542276818	0.678637341452233	0.691735317565772
CHEMBL1613829	0.56262962962963	0.542719474153298	0.564086160646132	0.605031481481481	0.606337733957219	0.587589144863584	0.602801851851852	0.569815340909091	0.573365950115225	0.568559259259259	0.589491421568627	0.603918739140865	0.599927777777778	0.581645499108734	0.598570047325836
CHEMBL1613800	0.888662052003824	0.895205148833467	0.900226660597094	0.946257271456501	0.963467417538214	0.966437160957475	0.972633864451885	0.96810136765889	0.967304920147187	0.954087146995105	0.956432019308125	0.954065665187208	0.97352973671443	0.976705551086082	0.971326011911536
CHEMBL1614481	0.61329086473299	0.611856266929789	0.632098095108819	0.662743290864733	0.64927628078113	0.658779580109497	0.615939278937381	0.627705089432068	0.628042848739876	0.650512333965844	0.629962617422207	0.638343570426678	0.618021143941448	0.645743921320102	0.661819600923035
CHEMBL1613776	0.572279105209684	0.524071147979898	0.533045634726914	0.569666818484392	0.535268944630983	0.583390287242975	0.587924359737939	0.554063247525622	0.563484407646795	0.541658637844655	0.526771567142888	0.573308468883638	0.587166730897243	0.565420150547545	0.56923707797153
CHEMBL1614240	0.644416757758475	0.611513814258865	0.653899986051724	0.721586212030387	0.689396511040644	0.731310512671287	0.695784702061221	0.682835048558962	0.715279614835194	0.724105439258415	0.698164446394714	0.709450197440251	0.717609515861728	0.698247240873979	0.726890352121821
CHEMBL1794486	0.908190491908927	0.903313989936256	0.907861698941025	0.9590416460362	0.954360863462616	0.952861522738886	0.941511643442655	0.946628590132648	0.939386464151675	0.95076981114281	0.94680334644468	0.929908991595158	0.949382657832897	0.95586987034746	0.946430144661956
CHEMBL1613970	0.751484449435144	0.703629839786382	0.715587618532635	0.833962841976317	0.843816755674232	0.791659522836079	0.770799305839118	0.759879839786382	0.758200018464054	0.768527970600245	0.806358477970628	0.754144520791844	0.79844664488907	0.805740987983979	0.759466125054403
CHEMBL1613886	0.76189519600528	0.795328710956004	0.779444861215304	0.869118406703782	0.898898164488774	0.853669162632273	0.825819319290593	0.876411995267461	0.836624528803008	0.834897836193537	0.861541291842099	0.830133775679945	0.842897319634965	0.875678319552127	0.836149254704981
CHEMBL1738606	0.721285990060377	0.751437420305792	0.758335791025911	0.849829547788229	0.8057800966274	0.793006109121551	0.784014457633384	0.790236070329773	0.788165156941226	0.802316507167207	0.789627762245125	0.790537181377712	0.799654988294246	0.809032205233789	0.805329681904361
CHEMBL2354282	0.649688259831805	0.735298421285751	0.727592347613717	0.819463963059627	0.849401259174892	0.797557749058716	0.736978295299917	0.789048658567451	0.734471354431668	0.74851379687256	0.787294751328777	0.761615956039483	0.740848557853175	0.813022019741837	0.76427190393813
CHEMBL1614331	0.813530060869256	0.81772039787437	0.711239436619718	0.791389314064002	0.73193441431621	0.705098591549296	0.803830135620973	0.768860426034428	0.700647887323944	0.744500409354643	0.784382522596176	0.725830985915493	0.74869184494358	0.764693191624654	0.704084507042253
CHEMBL1614531	0.6313013136289	0.581781135503035	0.615516159715055	0.685632183908046	0.656470747080231	0.646854066743569	0.680952380952381	0.622139301955923	0.608736567300103	0.656313628899836	0.635690219159082	0.66063080565843	0.672898193760263	0.624189123670531	0.64375771558092
CHEMBL3215017	0.844848754448399	0.862807115063924	0.850574841778078	0.913407473309609	0.90591624976839	0.915719831729269	0.872150059311981	0.873935519733185	0.865370932105007	0.890410735468565	0.874899017972948	0.884881848481444	0.880246144721234	0.897798777098388	0.883803317979253
CHEMBL1613983	0.777773687697858	0.798952197756246	0.799267759562842	0.880328351615991	0.905339370840751	0.876371584699454	0.837615647009743	0.88707750391283	0.857989071038251	0.836861027264473	0.87663233730391	0.810633879781421	0.842462391715134	0.901970154960035	0.879956284153005
CHEMBL1613930	0.643269786250722	0.603262055271566	0.649120785036881	0.776837867825736	0.692634416174403	0.733941429574991	0.720502874748975	0.681453895714755	0.733804223744292	0.741627924036936	0.678857949257532	0.717965182648402	0.74221250217784	0.665798129261564	0.746141772040745
CHEMBL1738317	0.880188414471259	0.869455458934465	0.868402353629372	0.950478644443768	0.951349198913145	0.944515940333431	0.922289174959676	0.933488930805825	0.914132099169004	0.928798468878812	0.927574252787407	0.926065413003458	0.92788547700444	0.94224802844066	0.925550126455964
CHEMBL1614521	0.559424388938789	0.576515048806941	0.597787075778708	0.622002025722858	0.644907470173536	0.655904230590423	0.622188354004625	0.634200447396963	0.648893537889354	0.605038985609723	0.650382998915401	0.651338912133891	0.610846217058115	0.642368831344902	0.654872152487215
CHEMBL1614108	0.735514384107554	0.774888658410103	0.814370828118481	0.855767929380273	0.913621296239806	0.893734355444305	0.787501691805645	0.905132898135155	0.877385794743429	0.785144442606433	0.849917637728022	0.864909261576971	0.818074499601486	0.896632298212434	0.871818940342094
CHEMBL1614076	0.671281503000631	0.671813747493791	0.680229328763407	0.752905689951695	0.748298021964868	0.741641298123087	0.72710945229105	0.718825747374091	0.718215403693545	0.716428849600762	0.712188033037077	0.733109286393992	0.72532673138	0.729628632133345	0.734252485543159
CHEMBL1614428	0.679226889579004	0.698866938385926	0.683740159595905	0.754080369860135	0.773301081103965	0.794100459442758	0.748712844700773	0.756283988961886	0.764310567183428	0.748575664884302	0.778586328595566	0.759821932346382	0.756774347958064	0.761876171452543	0.780589215185792
CHEMBL1614453	0.645967025089606	0.651370071434272	0.643089598195232	0.732094623655914	0.702155998084444	0.715581366989818	0.724923297491039	0.705690298507463	0.718824309493324	0.714040143369176	0.70637745430601	0.698930324370465	0.733536917562724	0.736172080772608	0.736349917687946
CHEMBL1794495	0.631995992531536	0.807614791447599	0.726177801437317	0.747984880914431	0.891838999883164	0.841695501730104	0.824400018215766	0.871421895081201	0.781940377961139	0.86779908010383	0.92875920084122	0.826124567474048	0.772530625256159	0.889706741441757	0.799973383018366
CHEMBL2114817	0.753926601963912	0.779682696389293	0.729654707135077	0.841500900964562	0.832906703026717	0.827459236259002	0.810990408736231	0.83009930409951	0.813025972829592	0.784211513321502	0.797880140466421	0.807677509903056	0.820068000402241	0.833038551086299	0.818298571033765
CHEMBL1794569	0.773048161899284	0.782130015028365	0.798125274466993	0.889102128327145	0.868659170843398	0.885728953407102	0.857093552266904	0.832809438757445	0.876228529722842	0.851001411912357	0.835758066927368	0.854796909888234	0.868367933901584	0.858501254986506	0.874530700099581
CHEMBL2114807	0.8500387984183	0.842664965684876	0.860325324166868	0.927926357413155	0.925544789522774	0.931576536868595	0.882774565245121	0.886981708022108	0.884496131666166	0.904848739317148	0.898322014866889	0.906576906219375	0.895578043284153	0.908773288933084	0.91603967319843
CHEMBL1614227	0.640814132903382	0.617835232025919	0.631665891476919	0.695303046063695	0.685889498528079	0.719786152149714	0.693256444929873	0.656794425087108	0.695121007990551	0.681823737452541	0.664160303849883	0.696107676468897	0.695121877221269	0.677204170552286	0.696691420478597
CHEMBL1613995	0.735731167786917	0.707370484734654	0.741130714906074	0.814126639910612	0.828928555999679	0.816226821174867	0.754482451346563	0.781644143912479	0.795517693587956	0.787747096109465	0.799544744816406	0.787853413286367	0.760027429016976	0.795379972474856	0.792894883444117
CHEMBL1614414	0.57945999018164	0.621697734181341	0.56400927686609	0.642160039273441	0.610719871838606	0.614874494846796	0.591501227295042	0.605261894474051	0.615420408372628	0.589392243495336	0.597983327900624	0.618956022818453	0.591194894452626	0.611316206402511	0.612716487687635
CHEMBL1613996	0.7797908441283	0.741900725921565	0.737555338086584	0.79582014552811	0.822324170910929	0.798173260636563	0.763500505759128	0.853310524474165	0.804138123864113	0.762578718961073	0.850752858975712	0.798583344983457	0.759307599438771	0.864179908579426	0.790996784565916
CHEMBL1613808	0.594913563829787	0.628724693470202	0.588780833813946	0.646124437397709	0.678964392643285	0.610053762371643	0.639659625613748	0.679889328485885	0.635271032622026	0.624321041325696	0.662028621328771	0.637869657737207	0.63418192512275	0.702838073852295	0.613623557332167
CHEMBL1794461	0.793045878243327	0.779315997938749	0.805599137862724	0.902102441484692	0.872005375420586	0.914610374173917	0.881666448732558	0.861575341773687	0.896159210130113	0.848313189994956	0.866069173175439	0.902700518233252	0.875740197635104	0.888434762400348	0.883401480213633
CHEMBL2114836	0.834128142065113	0.831663229033536	0.825941625782324	0.942817541373129	0.936503561763948	0.926274298007144	0.887490099628996	0.9047662388106	0.891795295388428	0.916623243986827	0.933779520594392	0.908764755805879	0.894487056567594	0.921493774444264	0.902714932126697
CHEMBL1614052	0.597322665025388	0.606624395867512	0.670744427418005	0.659501461763348	0.665326120693478	0.657712762532676	0.627835051546392	0.648782867024343	0.647121315528542	0.572364979227574	0.656285194874296	0.604285511930669	0.636451761809509	0.676725934465481	0.649368376321516
CHEMBL1614234	0.716790070109025	0.769943272275582	0.76314974704839	0.884027070700275	0.850974365366784	0.859190524342684	0.790613489550922	0.83676181791144	0.814981568162719	0.823711832369695	0.830944711244074	0.807405983903218	0.841141409606709	0.848319490368971	0.829223727577903
CHEMBL1613992	0.648344161988267	0.630801040142118	0.660300553524748	0.75366302907967	0.710139603232917	0.733809467863256	0.689202043777203	0.663929989114024	0.696720906573674	0.72160348199079	0.699643119554949	0.712474867092647	0.693643474421245	0.683014444877947	0.710139809724199
CHEMBL1614103	0.580144776400079	0.574690040619034	0.575842960580924	0.607373387811722	0.587394036184623	0.601227049912037	0.630655328128091	0.619550371100597	0.606670599351629	0.588117491616987	0.602979986842205	0.60348486351321	0.628493939564157	0.639720626662304	0.627618672248991
CHEMBL2114738	0.758158930390545	0.738158925919815	0.73947176518846	0.781484646657935	0.801912328823626	0.80227900147799	0.791767685681464	0.783825379475334	0.779785235729586	0.754718091150889	0.783932106913051	0.778906255086693	0.8087543620088	0.795558179343343	0.803792801474083
CHEMBL1794585	0.951206623216488	0.901204704989566	0.841528870917274	0.905443015677294	0.933551508252703	0.832069704190435	0.882860665844636	0.88937108708025	0.817315329626688	0.924396688391756	0.966455606146841	0.807037812597781	0.876272679231989	0.973285429709733	0.822273569692156
CHEMBL1614364	0.725572989637663	0.709144272979258	0.724534767749797	0.807420062332123	0.775094234259388	0.801301067472718	0.777392243300474	0.769401995773628	0.75501101171633	0.757355055949219	0.761847743210301	0.775455871440339	0.778639810817129	0.793962564030971	0.781819520181906
CHEMBL1794311	0.780087531110817	0.79086797651851	0.799139030525033	0.894579632527358	0.883381780196268	0.905850380571482	0.853725482786636	0.85975578997812	0.861904835705618	0.877059669216222	0.864569999936946	0.871980475939987	0.869837407869899	0.873710798500985	0.879726830904829
CHEMBL1963935	0.913167981212336	0.889148235599939	0.863439232141702	0.940950682382134	0.917646888922586	0.951672176549583	0.926999789524991	0.912423549884828	0.947422782383085	0.877437079049982	0.874400674421795	0.91125918260982	0.930576479971641	0.933314198239571	0.94246578990417
CHEMBL2114713	0.701830323184318	0.680263477372438	0.701001746293871	0.779317819229501	0.762455676422862	0.78254133211852	0.731832662416781	0.746779253560911	0.763434124860012	0.750557040248262	0.740530320331751	0.7709610627084	0.737752266867717	0.761376044233428	0.76765393960101
CHEMBL1614281	0.629977497071703	0.611528909476504	0.612324837250359	0.656842494082653	0.67608619823641	0.64702243028956	0.630731320868428	0.66616112289318	0.642545829983765	0.630700701333165	0.631714965397924	0.623727163821503	0.638663238574782	0.680448431744614	0.647990521376817
CHEMBL2114861	0.812829398599379	0.830592202517617	0.851767259198016	0.931947151830193	0.947757172132879	0.94641639107069	0.881264890621616	0.897323744021463	0.91705766845804	0.914810001684595	0.924697884303161	0.930175175692435	0.904257213678916	0.929489161340679	0.928818726746589
CHEMBL3215278	0.755075022065313	0.761998536650875	0.765415524689924	0.87938817418076	0.831039904048754	0.870797912698781	0.812780645525571	0.828339538674557	0.831087316703055	0.835310296254692	0.816772250084513	0.832586983787801	0.831134974338858	0.839186150975026	0.850293429956179
CHEMBL2114784	0.848953495219587	0.845488031647994	0.857573379950282	0.952709723623197	0.946924693471093	0.938816106701016	0.896473151614968	0.903931655785694	0.888527391716973	0.92001238557119	0.901521540951127	0.900962837636371	0.906930600909162	0.933301306183502	0.920866196067206
CHEMBL1614031	0.573061171711557	0.576080749545282	0.596586861375874	0.60304584790446	0.612420688634153	0.62060663862123	0.599691593907532	0.620362400067679	0.612126401386956	0.59190665601334	0.605903144960027	0.618387876494539	0.599793881284884	0.635750391269405	0.623559518040655
CHEMBL1614275	0.719584689458536	0.705902121403067	0.710245649160635	0.808275277725475	0.805864780975052	0.808612071741596	0.746836081448207	0.779707811150785	0.765814233510214	0.776863047045216	0.777571238535322	0.791028450219117	0.783814589665654	0.789341641578567	0.775436484045756
CHEMBL1794440	0.863390204566675	0.886287274254515	0.942014979463639	0.966047024870554	0.999588758224836	0.974691954578401	0.94576012223071	0.990313943721126	0.962954014657325	0.9825311942959	0.997847543049139	0.939055327373762	0.981665393430099	0.997348803023939	0.979181766932431
CHEMBL1964014	0.813856555609641	0.790514160803475	0.72293362783396	0.769541711626839	0.782873709042709	0.805470775072104	0.810125246856798	0.781377012498094	0.789599686028258	0.746474598042174	0.740079944395495	0.804891205140375	0.812594277549404	0.817041282210951	0.809255777445146
CHEMBL1613910	0.640624263466903	0.632772039243864	0.650990639444406	0.740740349877406	0.737375156326532	0.735600771142545	0.677281361799128	0.704249937220757	0.691446821359719	0.707836360374432	0.710506572551672	0.716990453626925	0.697719781476127	0.700905854754937	0.706522193575361
CHEMBL1963954	0.90321352163787	0.873207012680697	0.839302394277366	0.901898391377349	0.903020024072656	0.914641497081999	0.916590782917186	0.889851795114953	0.941703191571462	0.877529552347939	0.860606557974979	0.898465421759529	0.903922710285436	0.909019951125214	0.945592528428218
CHEMBL1964086	0.84655841385513	0.816150745899085	0.763696553272542	0.851258561446394	0.81319035753999	0.855707105649451	0.842165267624473	0.829975028575971	0.893763018116459	0.800690536863224	0.770996143271832	0.832519453199452	0.835193598228905	0.843135051272282	0.884541890422693
CHEMBL1964062	0.892114358223741	0.852345476950989	0.834644267417007	0.901413059811555	0.878818162691506	0.889113747923293	0.896055787757192	0.867961724788992	0.906942225688373	0.850486695866564	0.845851970457483	0.856071726107827	0.887395996237777	0.891516909347753	0.906866753040919
CHEMBL1963887	0.901404094568986	0.863395727536812	0.830422508100478	0.894989262927931	0.867122838056868	0.890882150075391	0.899636304957672	0.871038903044128	0.92070033043534	0.870198832369273	0.834198993245368	0.855975105065606	0.892246034110375	0.893511408207685	0.913149241281961
CHEMBL1614280	0.690831546408978	0.686372669387892	0.683747672131718	0.747364449023922	0.745479877196479	0.753464063805347	0.742905121278788	0.737222483134026	0.749618458037455	0.717431284636164	0.736039844251912	0.740301274018379	0.747185663761174	0.759133616418769	0.756237925543024
CHEMBL1963848	0.900555949718099	0.867873435621226	0.831529700432139	0.926037429795439	0.875400017113032	0.918433105361459	0.910079939774371	0.856087510639352	0.932691075221563	0.86723552445583	0.832884041197372	0.899188250750751	0.895433115430651	0.891404304377784	0.941775617080495
CHEMBL1963889	0.87658911088064	0.840831056021862	0.815680047601256	0.902322107638821	0.867213058754636	0.916095290150876	0.886141061516284	0.862472672262346	0.932949455952694	0.842191260787038	0.842120827640055	0.876177346967957	0.87762427515671	0.879840425531915	0.922157300934959
CHEMBL1741321	0.74833167239663	0.756424824718138	0.786694724663877	0.831754368424787	0.828991014736563	0.844236853722652	0.788562891986437	0.823185619398904	0.835393416866365	0.804594290677899	0.808563777171736	0.806834469834448	0.812161093659629	0.842883604310558	0.852109437405909
CHEMBL1614250	0.557428543302527	0.5811329060588	0.55795601717055	0.600719199499687	0.586998959812561	0.59282566290862	0.565432098765432	0.58183179270854	0.59553680244639	0.604761656590925	0.584203927478982	0.595583579149682	0.577964815972946	0.593035406828484	0.614220117800922
CHEMBL1614361	0.546658435228996	0.588365665223432	0.54169635507101	0.594023256243876	0.600239273138925	0.571445173876049	0.57967807878634	0.58665289590332	0.587076378176083	0.572399678137165	0.611475554444747	0.565423327822243	0.587304320920987	0.617710622845255	0.597831997066901
CHEMBL1741325	0.781136463133153	0.800465644563516	0.827864974226918	0.850855575366228	0.852011953325332	0.876044412311114	0.822860034579848	0.867786422279899	0.866890366516057	0.80923017347517	0.836067436300856	0.85795786991441	0.829376479339688	0.871126136496233	0.878595627969408
CHEMBL2354287	0.745749827052983	0.751906497950206	0.756723205851998	0.834578594245951	0.832671526624051	0.847582426508953	0.774155738788964	0.819191200431781	0.807403311119651	0.805076757955563	0.793659148571545	0.814677693317879	0.79080163485798	0.834009293904735	0.829885031435537
CHEMBL1614502	0.730177163338454	0.723911212953632	0.729468892612303	0.817809865164704	0.802331028072646	0.801421456703737	0.745859020310633	0.764851446424545	0.781387367208684	0.780986516470388	0.747247261065021	0.750099837655291	0.776281959378734	0.800581606688477	0.80010909795955
CHEMBL1614342	0.854005318810419	0.856028042065701	0.881541357664788	0.93639601735654	0.930523400705606	0.955346774813674	0.892872623660839	0.900717644195795	0.916584579804491	0.916640901120939	0.905988382609963	0.938992833135579	0.90348669220003	0.918790676156306	0.931436380572862
CHEMBL1741323	0.788800382601508	0.803182221569119	0.819422961739211	0.862398240411878	0.860041390418399	0.870231113685379	0.828271975149843	0.859392585165144	0.866393434080822	0.835752862831339	0.830377080686104	0.844710893980381	0.837543855258116	0.875321125104809	0.877789780667979
CHEMBL1963963	0.894681104519572	0.829244872228144	0.828192097441334	0.901024468110452	0.863974315647178	0.89831535407703	0.900976222809902	0.850485481061689	0.92112562615618	0.84646677626093	0.825197978137105	0.871531978133899	0.888136421032569	0.868231211168014	0.915458522998899
CHEMBL1794584	0.805611601599186	0.804993437482066	0.814266622226797	0.899698891665065	0.896638306222452	0.894943224235786	0.842896964789817	0.856735790621431	0.855605944615397	0.86717074028486	0.860112479150816	0.864352920189126	0.85714079302312	0.894108450931063	0.881090202607827
CHEMBL1613918	0.615751326713966	0.614369259368307	0.621471009607281	0.660897450264878	0.654066142468695	0.660248245560272	0.633306789891389	0.652140956141718	0.645751612705515	0.630854235060433	0.647381896696052	0.648860907022356	0.645212855709258	0.663222720633656	0.656393170709284
CHEMBL1741322	0.859185621200178	0.840869368507672	0.855804207623196	0.921991345309193	0.907217890207724	0.918591095387901	0.887533409652012	0.886713367402401	0.90077668560366	0.903058775671288	0.875017080080527	0.890471224385535	0.898137191900325	0.904533888397995	0.918208212542095
CHEMBL1964074	0.884277211651186	0.863907926211262	0.851525483145051	0.89087383893949	0.874753629001584	0.91440360280897	0.896937280187573	0.864673645353318	0.927375580961427	0.838347123275318	0.839717271749997	0.904291198787755	0.889341351790062	0.887522274243483	0.933950386930677
CHEMBL2114913	0.615568808745403	0.616911391396972	0.650090829115587	0.742944166326114	0.724229241535843	0.793215236441327	0.687851195341234	0.663132011985705	0.723656700218218	0.67567429505517	0.676826973808647	0.748299096278862	0.69315424499387	0.725437766915871	0.762316199572703
CHEMBL1741324	0.796841831523555	0.811162381804409	0.819605819122312	0.875393020705366	0.885688701546338	0.878364808631016	0.850540932988793	0.876931453087452	0.868688468694781	0.836788542308953	0.862905113755093	0.84365948391847	0.860153074112252	0.887104844713196	0.881005979365316
CHEMBL1614410	0.573130013893246	0.55423834215044	0.520657608157608	0.589659366487897	0.60601037615761	0.53971883971884	0.571543370332193	0.568146451552628	0.542245817245817	0.574816873073495	0.561452238727534	0.565629021879022	0.560153647350573	0.542349846430532	0.532535145035145
CHEMBL1613838	0.855638184327872	0.873375814053305	0.873546785224492	0.937784308116235	0.934634924434393	0.945792799968244	0.893443947845095	0.903153450595528	0.903773140352472	0.913789857656724	0.9148939770373	0.934867358737728	0.904306025215388	0.927969282642609	0.920647174370407
CHEMBL1794424	0.836563186178204	0.837890592744962	0.839096505413973	0.94131618266167	0.933481031782003	0.944540589832074	0.915206947218966	0.916234535166574	0.918996435694189	0.906137115946575	0.918502613890963	0.914732906612847	0.92047081111423	0.936060746740358	0.931861513733987
CHEMBL2114775	0.831420197797726	0.839539568519825	0.846607926752791	0.927097252267585	0.92639395014125	0.924017810109118	0.897464398003456	0.906623722749118	0.897490530540574	0.882116414098081	0.895946801743733	0.903002257619466	0.904685599699187	0.916067881014801	0.905301141352063
CHEMBL1614079	0.623213446249844	0.633560082429168	0.628444838551859	0.671846927727848	0.665886883662118	0.676854895425636	0.661704024771767	0.668264939963745	0.677697147137965	0.646311115012308	0.664493138759856	0.662689426369863	0.669866477701728	0.674282813286053	0.682610536937378
CHEMBL1614038	0.746271116854175	0.73216140423764	0.751536655735355	0.84897653486155	0.846231505555034	0.848448385889249	0.81092585844542	0.811796742029296	0.802067590949909	0.828844286017148	0.822423760671161	0.827028290991922	0.821160061619912	0.831787159762521	0.816589659655893
CHEMBL1737991	0.915489345353606	0.907740946428069	0.918318445297119	0.984375073164499	0.976336079777088	0.985512512301153	0.962598308001972	0.964263713351771	0.973628065246454	0.973691997136077	0.962143987049097	0.971571024807483	0.971212933053006	0.974852208475206	0.979863670929981
CHEMBL2114843	0.771817349073175	0.779699046775792	0.782163996413893	0.854321266207453	0.852902998519032	0.848510174098935	0.829738974410996	0.831723105732448	0.829240114279834	0.825971454814299	0.834620116045792	0.816211485405915	0.835686829938484	0.853246843288748	0.83882199372298
CHEMBL1614211	0.818068775138947	0.826237230746884	0.838473064132807	0.879135006113083	0.88051522793696	0.906204785999631	0.870419801959731	0.890524018342145	0.909859971298419	0.882521196451459	0.884805997510637	0.896770299821921	0.872733987856523	0.896384789343324	0.912153817523558
CHEMBL1964017	0.881086940202362	0.832349692350321	0.819815816525934	0.882230476445537	0.866237296403899	0.881409555338792	0.895114723897752	0.857404978510288	0.907982159689174	0.847750030940657	0.815181740391107	0.861943297676797	0.897198780025118	0.887638096934028	0.914794671115797
CHEMBL1964099	0.847176002488825	0.787263408978212	0.780669058695541	0.855775874772813	0.846089243238863	0.8675423305009	0.875443158187743	0.837745219493309	0.884349734596931	0.812320337956216	0.815030580636943	0.855282454037144	0.884620044864343	0.860748474469562	0.891440212189822
CHEMBL1963885	0.876332733540009	0.837021772939347	0.810352930053258	0.883574936828996	0.869426460786492	0.869568767586605	0.892290728736845	0.846188846922906	0.88979630427472	0.845803855538935	0.829148411464119	0.856799294333286	0.896746663197982	0.879835369917796	0.894988885319489
CHEMBL2114788	0.874691304368822	0.875709380778277	0.878059969508362	0.949150815381421	0.945902270810694	0.950023257920042	0.933813145580715	0.935378624402044	0.938270009295684	0.91801657322497	0.902324915885801	0.912901147665152	0.938421342373274	0.944924588556565	0.944610599174914
CHEMBL1613769	0.723142176972522	0.725165105721754	0.712950036715593	0.786322726950606	0.794088673431546	0.786869627094436	0.731046504303183	0.736979239002197	0.739746136373997	0.738879046291703	0.750410317586787	0.752917161789101	0.731384564707859	0.797378239555622	0.790882742307873
CHEMBL1613836	0.775217052200338	0.789686386067497	0.765683916121229	0.902302084105411	0.838292914718354	0.866561284623411	0.832356022882709	0.81630499873182	0.841291826740656	0.879488861861477	0.838245292212747	0.850158888256498	0.840298600489189	0.83796613487325	0.865611956934168
CHEMBL1614174	0.632567751618774	0.648242453582811	0.637185513456228	0.707683185785617	0.716655557474841	0.70998354309259	0.672671682226175	0.698162069439177	0.690055056748116	0.688322292877093	0.704168985142876	0.68850921966771	0.687321069449537	0.710123053139689	0.698612157014197
CHEMBL1963976	0.858547620579865	0.813100464265562	0.8149268867153	0.871027019008529	0.836838726279302	0.864179199168895	0.86805744770664	0.82532157542144	0.892016570560193	0.824101466079261	0.814237187041867	0.856515463774452	0.872630096673317	0.844382965739991	0.897647448345868
CHEMBL1963900	0.85220501476288	0.787626463641101	0.780904883342159	0.826653612691566	0.807756523423203	0.858065134952905	0.872492796616764	0.820340023396392	0.865367135013708	0.806921367781548	0.78535151074365	0.816843148165038	0.876249397574788	0.837347700890614	0.876246488222037
CHEMBL1738312	0.841878502169945	0.84134098004339	0.849428267313102	0.942213987302188	0.946404015323824	0.94813898472457	0.911857251731863	0.917181415229448	0.926641751098628	0.926650783143015	0.925332258787723	0.928501920388108	0.923552184765963	0.940106089673875	0.936322906684673
CHEMBL1614544	0.640013722278784	0.627777703398501	0.640413836196139	0.708032144069172	0.694738967786707	0.69909516028251	0.697548525961666	0.675140995217041	0.688894991592842	0.669431502958405	0.664580885790248	0.674065603156646	0.702407485281749	0.701544113791368	0.694401907687039
CHEMBL1794352	0.799902693602694	0.800915905348701	0.832451814103266	0.900851515151515	0.911591766847848	0.906707726938769	0.846113131313131	0.866148018802783	0.884290928702068	0.874875084175084	0.881659503490849	0.866142470807084	0.849488888888889	0.890689273088885	0.88454612246174
CHEMBL1963945	0.851254271795245	0.785455186336399	0.76847644876491	0.835638284980247	0.824634697343545	0.844666417983726	0.864060501277836	0.807172536076308	0.865112184823723	0.814116650643227	0.751807553860779	0.808508398652629	0.872510105539263	0.837537785325942	0.873186242176627
CHEMBL1964045	0.860090770886736	0.80654590412138	0.800659804915867	0.873158921180243	0.847693413798629	0.866519576691162	0.86529678085156	0.838887696647032	0.882825816689032	0.840621220191529	0.827938071281462	0.850763575757534	0.883486051466427	0.8660144814843	0.889978121255477
CHEMBL1964063	0.883839074423107	0.827085126554645	0.829585253804612	0.88097448582946	0.856329707387864	0.875930583310863	0.891255824866333	0.844552921339437	0.904209202637965	0.845662989820954	0.809108992511092	0.869354318445848	0.900176150898287	0.866066899109731	0.91197819671842
CHEMBL2114780	0.746094591935227	0.740846305193558	0.743441794749243	0.818610821862457	0.794039217011058	0.802963325710173	0.796067847536162	0.78879136392317	0.805843201333451	0.793030093558541	0.798419338295126	0.790337580939111	0.806230902928029	0.80512939514179	0.808414605114116
CHEMBL1614236	0.727736916080417	0.71567054931295	0.747567286619853	0.811860705560298	0.788095235659511	0.814311400550565	0.752790066576934	0.746549454124348	0.761333798425086	0.742298195358346	0.738037026655427	0.776765390554622	0.755074300313351	0.804820963834715	0.816828836527088
CHEMBL1614161	0.639062785448674	0.655263443864175	0.650702785808168	0.720486271944557	0.726920215670525	0.735568157643269	0.686605407539675	0.703614016229623	0.705909054111878	0.692666112712079	0.706604140084417	0.712287768408466	0.695781075968389	0.718823809605742	0.719640282429487
CHEMBL1963882	0.853438692045774	0.811365208021743	0.800786190983968	0.864126302450014	0.838032084992571	0.868167346913762	0.864485836256112	0.836559801225455	0.870817169804383	0.821048248252733	0.801235583340447	0.830149730965338	0.865993014131743	0.858179764904689	0.878771541158013
CHEMBL1964034	0.863585121535293	0.802986482628502	0.784016797738623	0.862605090199106	0.843473766208148	0.860740594988485	0.877719226725857	0.834970265003283	0.883226284691541	0.825979295862395	0.792942974626874	0.826894764277862	0.877858616520763	0.854331644430697	0.887629452981827
CHEMBL1613914	0.714873046261905	0.699977520402855	0.716821339340168	0.773482493961303	0.762205888172678	0.776290629514152	0.761660915979512	0.754314085870977	0.766779638655191	0.764576676075345	0.761538773600641	0.774753008288306	0.767107760542275	0.766138281687784	0.774314415651084
CHEMBL1963921	0.850114666139182	0.807708947009496	0.807136077451782	0.866179670404391	0.842077120787529	0.866536608669211	0.870277877368015	0.825981967180534	0.88478423032772	0.811262419589468	0.819501767728629	0.857587601182733	0.872933227836364	0.845144924437656	0.894378139763609
CHEMBL1614441	0.638174346474992	0.632952580379432	0.636886720106313	0.721828936771168	0.706638233339831	0.710076762246863	0.684988995342738	0.671068041904834	0.667389908749597	0.688326975658039	0.692478897713386	0.698071076894639	0.694778217043132	0.690129218099233	0.680059051725215
CHEMBL3215181	0.877798084398756	0.862191509669222	0.914124258965369	0.959721802292099	0.926414312941973	0.955981247277368	0.933123578236581	0.919169818490568	0.94958466575994	0.939847709341166	0.898981569994241	0.935030575192749	0.944364507745911	0.913678371461991	0.95493491595032
CHEMBL1614257	0.665771511775582	0.669863603058598	0.683425593628007	0.721019575760082	0.713218103594041	0.717326648430495	0.67663283931219	0.709255171247675	0.70635922971226	0.680130514912193	0.695511112781107	0.698110251369618	0.685214364614776	0.71782319123753	0.729296993063651
CHEMBL1964009	0.847824165934548	0.783960995270033	0.798562140787217	0.852357951538084	0.822401499391204	0.868164741904439	0.854815941770664	0.818376764201245	0.88057394742926	0.820501568740637	0.781905127876692	0.840335932837626	0.866942956832565	0.852122167778321	0.885947421194966
CHEMBL1963991	0.842965078738888	0.794323941472799	0.790173530444291	0.83525891639433	0.825269540792987	0.833946049952074	0.840357977157919	0.822207226644514	0.860183285218727	0.800105136260615	0.784446185569515	0.813559419008178	0.854467349509763	0.833896944353109	0.865397180368675
CHEMBL1613842	0.760239450408642	0.762182000975263	0.75386522614768	0.835300358811682	0.834053482953964	0.832560274679144	0.790460796264391	0.799153567837986	0.789877059710978	0.798462039494347	0.805769183688622	0.81015432712819	0.795942319249082	0.826377198104859	0.807736245033214
CHEMBL1964075	0.838812185313024	0.809513450292398	0.798533665671669	0.84011979027654	0.851385038986355	0.864686401435505	0.856698506692965	0.820540350877193	0.868891808277235	0.817669461622326	0.813813742690058	0.838025278300868	0.862093988771923	0.857360185185185	0.87722752266188
CHEMBL1963860	0.870368025590454	0.813371778436031	0.793588423778002	0.866495344926874	0.82819560331538	0.881702744035602	0.867483630142952	0.831410786505711	0.892311813900105	0.841718029202469	0.788719512639776	0.864563971687308	0.86894060788393	0.842550605043659	0.894474302495438
CHEMBL1964065	0.808187614418282	0.781016584984729	0.788505004109655	0.822504424389293	0.816193310959585	0.831384180244645	0.819071900831548	0.806998410753605	0.833333027123725	0.798527291218312	0.778969786561546	0.796590243194894	0.830798648318453	0.833725229064564	0.839889039307644
CHEMBL1964087	0.897084959470559	0.855207205779023	0.833933430342881	0.889667436651117	0.875288302994124	0.895168942954889	0.906346716362419	0.865483730604002	0.913978425346674	0.859824384315724	0.837404377201956	0.873891653650759	0.912721745174395	0.887386584033707	0.926441176226954
CHEMBL1963895	0.892123152951475	0.844644471915884	0.802251915577317	0.885126004548277	0.876675857223995	0.881193292174479	0.902541040175951	0.85424575694764	0.907128899795095	0.860863791448274	0.820860314111781	0.85410946628228	0.900544137519513	0.881261056680591	0.906347478988392
CHEMBL1964092	0.86754906804903	0.823382096017825	0.804026471497091	0.866396981988144	0.866514349218035	0.8756056310652	0.871378634683222	0.84094612854608	0.886798923590714	0.838066947308085	0.812206955960407	0.838459415068782	0.876385411112693	0.88212171015998	0.893652542529932
CHEMBL1963994	0.808685511215176	0.781695421768547	0.76677480811121	0.809731983925991	0.814085354646257	0.817212957045772	0.808284925671034	0.793569200451573	0.83111007751139	0.777403253554976	0.778338457048366	0.789896376617397	0.822949455038349	0.823488944632188	0.838622343276505
CHEMBL1964025	0.861963408943275	0.80535730253258	0.818871161780286	0.850665559725962	0.829593606850971	0.870426648753839	0.871183108767001	0.825917558933011	0.894495984285057	0.816199550092167	0.802897853706642	0.843167769800608	0.872479035566284	0.854330908821493	0.89983197554941
CHEMBL1964004	0.872034533057408	0.821684853615614	0.811071585056739	0.870416531714104	0.848568027743707	0.885020472008346	0.880545793566471	0.857845093745556	0.901322521819971	0.843544239383816	0.799261273241965	0.852171610710601	0.882368620107108	0.879978080115899	0.907368631797848
CHEMBL1963866	0.808188755618665	0.766377307352781	0.762292278669908	0.804019511855536	0.786132574217161	0.833902210876373	0.841705066519583	0.806735895515726	0.861734225567579	0.77356812355545	0.754438771461728	0.821489956107831	0.84457601891626	0.825766224620359	0.864161715892844
CHEMBL1963903	0.872229161530665	0.830956130998462	0.801769577210895	0.874823732434875	0.859388036063639	0.872511503342643	0.877847467608952	0.844380841967973	0.896847495672791	0.834470238584381	0.820739697951494	0.836010126960161	0.875120182430767	0.871972010309812	0.899908776985851
CHEMBL1964066	0.888173852043252	0.82620677146312	0.790070840946169	0.891047600670146	0.856836457073761	0.871501242641687	0.897728056184529	0.846290104796453	0.903477987965296	0.843155877295336	0.825584139459895	0.85344224073869	0.899823217324099	0.874584945586457	0.905538883082111
CHEMBL1964037	0.857740550954215	0.813756910098024	0.80411129015567	0.876244130429808	0.840808314502616	0.867169509845387	0.873369874463495	0.828275946088108	0.882482747480225	0.830466619127569	0.808136942689828	0.842992905484545	0.872758341707288	0.85321971877824	0.887428247462257
CHEMBL1964018	0.874506143752945	0.831766650870649	0.815731095343738	0.878679075578275	0.86577654205856	0.884116943152688	0.888081198210133	0.845649736279307	0.895557355008735	0.855573574788456	0.820849414249464	0.860155593748197	0.88567717498442	0.879736431252184	0.901340161660499
CHEMBL1963844	0.870021401947121	0.813551074097547	0.784888162825668	0.868662671829805	0.842901680794317	0.873390124552215	0.871709532164887	0.842804388153899	0.889112788161596	0.830895537045372	0.807072655074071	0.850754672718174	0.881163025146744	0.865792270722755	0.896156195243739
CHEMBL1964091	0.866893543842201	0.819292280254352	0.809242466110273	0.870798074669776	0.84574984790526	0.881790469435636	0.878010293243483	0.834783942128993	0.890242126131096	0.83640864255217	0.807691410189098	0.854529831025803	0.886387530221712	0.854514671933728	0.899313289211816
CHEMBL1964049	0.893405084170703	0.839055339773979	0.786307450214336	0.884420102477275	0.845727331839906	0.898423499195109	0.901543397199086	0.852237921859413	0.917847595275562	0.866912847376058	0.81809777124323	0.877884131893574	0.904744576791252	0.886455638073518	0.926959683108145
CHEMBL1963911	0.852064855754689	0.798067281255054	0.776038507870049	0.858215525566005	0.835474223065198	0.865656113421284	0.858156082616376	0.827551227951519	0.877144774103757	0.830843067116335	0.8168855586432	0.829588570050993	0.865157966724769	0.857493175324325	0.885674490416335
CHEMBL1964059	0.89483563713709	0.865537674211737	0.847928090593565	0.883856858502697	0.892062264421818	0.895642749220567	0.903536500256052	0.869994764147358	0.920648204905808	0.85437731037987	0.834346911832182	0.865603190290131	0.906256347197444	0.899666425517181	0.929644734117006
CHEMBL1963961	0.818070118472405	0.786128817436068	0.807724197187799	0.831501214260109	0.829589780850517	0.854384181874603	0.830312671978108	0.808491985177805	0.841997062112005	0.800150906845297	0.781457555762144	0.820929762021716	0.839350673775516	0.843110150791964	0.859168385892524
CHEMBL1964043	0.879508227835949	0.84581975960189	0.823633600862382	0.888900654653666	0.872466622207701	0.902490709878991	0.885527430248027	0.86359085645743	0.911828442432034	0.850084354426655	0.822350924463024	0.868521829827732	0.885508303755666	0.890950064226795	0.916844546873761
CHEMBL1964021	0.876836253665273	0.828011665533322	0.822343809956057	0.869754151563729	0.851869612446125	0.869165038708301	0.87334513662151	0.840723459317927	0.887995874252197	0.832670754924669	0.82296901094011	0.847563465815502	0.880562183277573	0.866448091564249	0.898154825666136
CHEMBL1964085	0.874552815406913	0.838989674113102	0.788837620738491	0.878526906310197	0.870989193238546	0.885103120368332	0.88140576581027	0.848070093427766	0.898450061976055	0.842027828289065	0.832967626908905	0.858535285916035	0.880400390084362	0.885490690755435	0.903931810364753
CHEMBL1963880	0.884857902161017	0.833075160618571	0.800065258177665	0.871441390151549	0.855609689479462	0.88514244358699	0.889415059576643	0.846118710736958	0.914343511454298	0.83501719160458	0.823566088909534	0.858716045354433	0.8974342594834	0.87330443677813	0.919112865010142
CHEMBL1964040	0.830465014065445	0.814452422502066	0.813218407288679	0.838587224036311	0.848225331819547	0.859064239919015	0.839804996569715	0.82963373393162	0.856417875822507	0.812842274036863	0.806368368737701	0.821899865024464	0.847086382830041	0.858198224126401	0.871200565210056
CHEMBL1964088	0.845530868722836	0.81782362846662	0.815464947502533	0.8566826726711	0.840073746230624	0.866150180960303	0.856669162695711	0.830980974158683	0.867052352236382	0.815273446091009	0.797855489657168	0.839095512052468	0.860674975126983	0.864242768177384	0.880030044526302
CHEMBL1964007	0.88966116811188	0.838697654046142	0.83706329250929	0.897917057011594	0.876764740290534	0.890032394815323	0.896088743826305	0.849667350720415	0.911309345825443	0.851980266658672	0.829591493175363	0.876875897168211	0.90098235765838	0.883359754242027	0.925587314439669
CHEMBL1964047	0.885748030648702	0.850240042570423	0.841322017938249	0.891072530342256	0.879245124563291	0.895396472700462	0.89145232099555	0.860913915716593	0.908667317195515	0.849529812893691	0.836375245706806	0.870888554107261	0.895554303465607	0.893985197180177	0.915238386352554
CHEMBL1963901	0.881468601443598	0.854269292936827	0.846765370795847	0.893493710339859	0.876852635993968	0.891168564377817	0.882437060793523	0.868523843779109	0.903589639549556	0.860654699477639	0.831173595431053	0.849163847482626	0.888525958925026	0.893289179226418	0.908603403769529
CHEMBL1614421	0.722992251117681	0.747583987283454	0.756834556052542	0.833524534703935	0.822381159450961	0.845970950956288	0.785254553559573	0.806821144012128	0.8152608522501	0.801877152008819	0.788851918214497	0.808644937481692	0.794812217553619	0.816998982837567	0.826806481234634
CHEMBL1963990	0.826489676366878	0.799269889363912	0.779419736390706	0.840228110732975	0.833033921389962	0.868752188627716	0.846817403492705	0.812253365648524	0.877401856233073	0.811430121062216	0.7929667669095	0.832328151620616	0.856474213528156	0.847893240124437	0.87919954578026
CHEMBL1963876	0.888307222945644	0.846371402966919	0.851348509563861	0.868515064128418	0.87712381790922	0.902379947607993	0.897827527397181	0.848138972759479	0.910409396573597	0.847981078371495	0.827906894647003	0.874318946517361	0.89173143848166	0.891826090006179	0.915359548902362
CHEMBL1963989	0.888581718894547	0.842467054199557	0.82985095204183	0.890948641259853	0.88059544190126	0.897214167784417	0.899583185655451	0.858481743108997	0.912532142910889	0.873820494166465	0.836360245951272	0.866307214624108	0.901126289979253	0.891557248718316	0.917656804248277
CHEMBL1614249	0.643764005366938	0.653178023412047	0.630406910968772	0.690991493079292	0.674710099046396	0.66887497262632	0.652937158628233	0.643259449834724	0.65309636120131	0.62956485165608	0.645691764167321	0.685638711614303	0.677374568686838	0.675234759577656	0.661730848333893
CHEMBL1963953	0.871673163350023	0.837148548226461	0.829404843956519	0.885890350069044	0.877424229030756	0.891108917398006	0.885785116506129	0.861080800759036	0.898338731423613	0.867581364737676	0.831527677103407	0.856413487308195	0.887335557666404	0.888883427918133	0.900910089646284
CHEMBL1963854	0.891396547620025	0.852187759326743	0.82607667345365	0.897352436611973	0.874576959157166	0.891461536777423	0.907414627606454	0.853763789417665	0.914220311812027	0.863122764968385	0.833427048004763	0.863863569466845	0.905910812149269	0.891583888818733	0.916126140590297
CHEMBL1963985	0.889479733801168	0.849854762815074	0.827556443492204	0.882925963818395	0.874688246378173	0.889728369826754	0.900928268277308	0.861554591416311	0.901101951271569	0.841036198027384	0.829641819895939	0.850679394670738	0.899105811551181	0.890735974323997	0.912775616083009
CHEMBL1964030	0.841369198756894	0.810819044668257	0.80804894685061	0.850309291183539	0.850711900648183	0.846831256760816	0.843894640603126	0.830007849432976	0.855743118392698	0.80044511148298	0.809608163147167	0.822165104690777	0.84630470238592	0.857452866399789	0.863659015521869
CHEMBL1963960	0.894482816767291	0.848322225528117	0.839090376612211	0.89869588290141	0.859786819398988	0.885779634144174	0.889153435654629	0.844224337994644	0.904350764804553	0.846931187716154	0.827794555191907	0.864452712731973	0.898564537140515	0.876989140136864	0.910064091753135
CHEMBL1963929	0.871060065447221	0.813314885665378	0.799240843904729	0.866313755928597	0.836853337061513	0.875413095140143	0.874478620090633	0.840726097028141	0.887642356892905	0.847267664347369	0.80430127326418	0.838838566194443	0.875197839898516	0.858871418731373	0.894923309988336
CHEMBL1964006	0.878842444174897	0.835834154980537	0.84027375070486	0.896642506380089	0.869514559468029	0.888865148288499	0.879445228471653	0.850134090114246	0.896911210546948	0.848939988453743	0.824451340235095	0.864179966307968	0.883847790791078	0.874200206316798	0.902744805811699
CHEMBL1963868	0.861557691051448	0.826074337375789	0.805151759884282	0.865093455811981	0.868312966171261	0.865559245419479	0.870442564544443	0.844684347708722	0.880377832690453	0.83991447388204	0.834661955999849	0.847134462391514	0.878097220796485	0.876767772312608	0.888974867405979
CHEMBL1963922	0.878565131270108	0.846518277154115	0.824618418186988	0.883645840318976	0.865792017526122	0.881950577163958	0.885854939074291	0.859515378301505	0.899498405733872	0.845854740068665	0.834656178586814	0.843540203849448	0.885758366823527	0.887330859874213	0.906742288714903
CHEMBL1964077	0.86124843921012	0.81675360167778	0.822338648063963	0.85190250099726	0.856299039883683	0.874166959099377	0.881351934750519	0.832608717245059	0.887809171389953	0.819007051940063	0.821517585893257	0.854256546720366	0.880365581115643	0.856001531058928	0.900063218580203
CHEMBL1964048	0.886685035328259	0.838236592326535	0.815740900647027	0.893024991306001	0.88255505875667	0.894339237530279	0.893874594226672	0.857374037896732	0.908840453274926	0.859976136030775	0.832118890300292	0.859388806194495	0.89782821734971	0.889582666473488	0.908687514334456
CHEMBL1964012	0.870054892141757	0.824491094883753	0.833369773117616	0.893256205305993	0.852422376780734	0.884947422154397	0.87738137568646	0.839273587853398	0.893157526283114	0.849683499762949	0.806433266598003	0.85644945844517	0.884642793647031	0.865297936605293	0.900176154022023
CHEMBL3215106	0.620861661992858	0.624222346947772	0.66838330489553	0.701732419418834	0.741099595502139	0.70799760372619	0.673874082891171	0.705369219884693	0.673813210296958	0.660274224786652	0.71399356158109	0.680596404153435	0.686900222594333	0.72929394586481	0.680928643847822
CHEMBL1614087	0.691212994708674	0.691892848337857	0.695224387620474	0.764054418842408	0.766385719135943	0.765668285395362	0.740023275391994	0.751923152358925	0.751170821580986	0.72998540728146	0.754992262439369	0.752941623477998	0.748453794817447	0.765403189744489	0.75726952824239
CHEMBL2114810	0.70866335885103	0.720080975663882	0.759086225655857	0.852869160060429	0.829822659195454	0.861005412351141	0.810545707102296	0.819022738072553	0.854264837221699	0.802890741736074	0.799493721189959	0.834313381297254	0.836095077590935	0.832587578907251	0.862001456023901
CHEMBL1963874	0.869431102601244	0.823588233444379	0.823084521043201	0.88301244242829	0.863818377890447	0.883107688712956	0.869881322045953	0.84649164750646	0.89158427196471	0.834900599352942	0.814929284502707	0.853756407975659	0.875877670416598	0.876152988159825	0.897431846548859
CHEMBL1964072	0.877101869843751	0.838121667376661	0.848514454281996	0.892503241710754	0.868207059122081	0.886526249399655	0.889213889895369	0.852722910920983	0.89841680242264	0.858285497615502	0.818301250860185	0.868026232802201	0.893559873732175	0.877937681039036	0.907238559626671
CHEMBL1963981	0.893580731461843	0.844197426293644	0.826524766437511	0.882649957069831	0.878753520321368	0.899854938500917	0.893558768842364	0.858742190962245	0.913418898858301	0.857858708569544	0.840442833793179	0.871327330319686	0.891041667851274	0.894261757039451	0.921292694747096
CHEMBL2354254	0.820834952371701	0.813806907906345	0.82337261612556	0.894984885800653	0.892916120800692	0.885936239628373	0.862309477279178	0.864760808697685	0.844700922281742	0.831054655878157	0.848302191403769	0.843913869661718	0.871923469961124	0.895583420451338	0.870589169008164
CHEMBL1614530	0.587157534529327	0.585818744745491	0.58299749022524	0.637427379171844	0.642599620182533	0.637100633277563	0.621253414172476	0.616267469727443	0.61376058401251	0.611755620472864	0.623372781083377	0.628991492315757	0.61934790192711	0.629871476113737	0.626257190224625
CHEMBL1738442	0.802777918578755	0.795444929135462	0.815497660875364	0.916952565577943	0.903142099427778	0.912766331674272	0.865790043596458	0.868815468916915	0.878131594230127	0.892088616365822	0.871508651136384	0.887912444402368	0.879844276672	0.894221394806954	0.889392469129279
CHEMBL1794553	0.684304619799048	0.706803276366624	0.728381585358586	0.760850024736239	0.755603183976397	0.78790699052869	0.72877651791516	0.76280410875027	0.757604342634472	0.721363285446848	0.745736539680949	0.768410259646023	0.743651298045398	0.777850184017798	0.790996853731497
CHEMBL1614458	0.64282367528488	0.634636252847659	0.654420439159818	0.735855465688433	0.715423665338978	0.734626651922786	0.700114682894498	0.691506176717118	0.703556584535188	0.711997089534392	0.69398562340679	0.708644710730596	0.710641185628185	0.704476906642049	0.708413239237862
CHEMBL2354221	0.820502802521179	0.83281303364071	0.850421103611287	0.899166253843925	0.899802397291951	0.915774099614991	0.859074466991317	0.861796617073657	0.884362206978897	0.855249235888472	0.864902072482639	0.870964867927287	0.870437685575506	0.898610822055726	0.909463485062625
CHEMBL1614459	0.509128191801316	0.530683794371023	0.523133481741513	0.54208945998813	0.527329172062644	0.53297765315296	0.556331908706844	0.556351501355362	0.569623556944504	0.518506424866463	0.532790035472688	0.528078898925468	0.560853441403602	0.543299321916651	0.556332320162107
CHEMBL1794345	0.713813282352551	0.700066539806702	0.718638663524107	0.766299514142981	0.7512362892559	0.775528291991389	0.736028260936052	0.738132392652939	0.754891000290161	0.717920746892048	0.732313799555563	0.748197500752172	0.751717303390404	0.75544083837642	0.766172647671536
CHEMBL1794580	0.846355281506833	0.849615800166464	0.853380522589444	0.920893123666666	0.925701485571739	0.931109759243237	0.888302047926506	0.904958797299712	0.906250439799046	0.888154232913168	0.892675669116791	0.903222961627257	0.898503783008706	0.923815699137211	0.918622997850945
CHEMBL1794401	0.876647661162751	0.872067221441471	0.888179727752087	0.935997576512269	0.945843552105137	0.954371490578839	0.92275517571784	0.936778923807517	0.948683086511807	0.926765621663551	0.932922438676829	0.943366711915385	0.931669725305374	0.947559136431154	0.955169169776095
CHEMBL1794483	0.796833943347101	0.807766060181274	0.804329045514943	0.859337419403209	0.855660428474945	0.886004100747691	0.838366117313486	0.8666296324279	0.871592839140916	0.840323409533936	0.855491346194784	0.87053765118669	0.849950602516392	0.877095065730134	0.883472090803821
