# Supplementary material for: Large-scale comparison of machine learning methods for drug target prediction on ChEMBL
Source: Royal Society of Chemistry journal article supplement (doi:10.1039/c8sc00148k), 2018-01-01
Supplement: c8sc00148k5.csv [file c8sc00148k5.csv]

	StaticF: fold0	StaticF: fold1	StaticF: fold2	SemiF: fold0	SemiF: fold1	SemiF: fold2	ECFP6: fold0	ECFP6: fold1	ECFP6: fold2	DFS8: fold0	DFS8: fold1	DFS8: fold2	ECFP6+ToxF: fold0	ECFP6+ToxF: fold1	ECFP6+ToxF: fold2
CHEMBL1614338	0.905245548102691	0.858078231292517	0.858703476011168	0.94117241885099	0.858758503401361	0.985096153846154	0.968963476999191	1	0.988130459284305	0.930117997082283	0.980867346938776	0.94699814074814	0.973529149422006	0.900425170068027	0.978932445759368
CHEMBL1243971	0.697373042163792	0.416666666666667	1	0.826477178136628	0.416666666666667	0.405555555555556	0.799150073692613	0.416666666666667	0.655555555555556	0.694088954152745	0.791666666666667	0.405555555555556	0.62361786045213	0.416666666666667	0.655555555555556
CHEMBL1614044	0.866275391275391	0.946367462353846	0.691025641025641	0.982575757575758	0.992645564191135	0.663247863247863	0.863768176268176	0.986473829780489	0.644829649517149	0.972020202020202	0.991483233767925	0.840001144688645	0.968093434343434	0.996433394294357	0.627558379120879
CHEMBL2045986	0.988271604938272	0.958201735054561	1	1	0.878251691737452	0.999705254035753	1	0.959539685541671	1	1	0.880472942708703	1	1	0.972642435230339	0.999705254035753
CHEMBL618396	0.980462519936204	0.993279569892473	0.995238095238095	0.994452139119729	1	1	0.968509639067322	1	1	0.994452139119729	0.996819382647386	1	0.972320594194066	0.997917750607007	1
CHEMBL3079731	0.80403115540634	0.937255874285673	0.965390467855866	0.884503293490965	0.84392254095234	0.965390467855866	0.886252946013883	0.916839207619006	0.935255080367537	0.867560444648881	0.975951880077267	0.996635909265667	0.876290344588073	0.916839207619006	0.952236873084624
CHEMBL1794498	0.940112182225106	0.92962962962963	0.976085955319365	0.932824466882477	0.974206349206349	0.978408859987808	0.932973138201478	0.974206349206349	0.97397678412716	0.947196869307163	0.943650793650794	0.951571931271179	0.94928339061466	0.955357142857143	0.966076307429691
CHEMBL2091156	0.954700577200577	0.972990410928683	0.975382595683348	0.827260101010101	0.973265179802347	0.990773809523809	0.920790043290043	0.97834604707365	0.987001050420168	0.990454545454545	0.956939848853446	0.987001050420168	0.920692640692641	0.973946482710608	0.983660130718954
CHEMBL2363253	0.665991638972483	0.694649109105231	0.749908123643443	0.771269505634831	0.772756132002056	0.87803174494351	0.832461943249987	0.795631653929688	0.850405799946241	0.695740752303252	0.723396119537245	0.732165339784341	0.801787715812652	0.744759535878535	0.827730831832999
CHEMBL1738192	0.38327850877193	0.511471613817152	0.895604395604396	0.348302904824644	0.73639997665733	0.86	0.366640037593985	0.458233086358086	1	0.37634899068323	0.415887997827336	0.963333333333333	0.428251262626263	0.714321036332421	1
CHEMBL1614154	0.887375497350883	0.992808654297954	0.96390977443609	0.991869237542175	1	1	0.934974614331027	1	0.968498889153321	0.924555802598585	0.991091508479485	1	0.985952196105276	0.972821201398484	1
CHEMBL1964055	0.979214131348074	0.988586707761861	0.966367395637779	0.998045920393451	0.984244944945389	0.971694180653642	0.915266574824852	0.984243372113851	0.807204965588016	0.993373878602027	0.920032584700553	0.96694543540016	0.985920500830321	0.992301388882839	0.923302478810275
CHEMBL2363800	0.300715131585391	0.404737402860739	0.36159876618685	0.325098667779589	0.321783189216417	0.452366962859458	0.616309713678135	0.389715869124172	0.412560402031226	0.318170611047449	0.300542857268182	0.512024914556884	0.505648518148518	0.390001058065075	0.504712024087024
CHEMBL1794420	0.906062304425308	0.866433941997852	0.961539469092644	0.841602343066481	0.894859307359307	0.949034304699603	0.771778559725008	0.944160997732426	0.950423996878769	0.853141728900299	0.897155225726654	0.954058551126499	0.860841067540741	0.944160997732426	0.945281103014071
CHEMBL2363263	0.232673668391379	0.621703378321025	0.594143955492789	0.267863636120215	0.73734903453803	0.643966990395747	0.5506277771724	0.726231826699741	0.576538026880836	0.451140284835937	0.716583569665472	0.675673996310897	0.672720229945294	0.739521274180365	0.619712592658687
CHEMBL2363552	0.529504005190504	0.74135705564277	0.784145125522131	0.516978259835403	0.898362507058159	0.873386774044669	0.69156223893066	0.753357951572237	0.781259957753414	0.604735740450026	0.789513313197524	0.733757634225549	0.617884350883409	0.966269841269841	0.769623432123432
CHEMBL2363168	0.612801533619209	0.674898879285489	0.74308287709023	0.768012752179081	0.784175637958533	0.810724345099345	0.76515352273368	0.67071231612472	0.470013870932989	0.60333697632311	0.623207026486143	0.632939721097616	0.727163572873718	0.802004281949934	0.701333745373993
CHEMBL3214806	0.969166348703289	0.937686512180778	0.890387090439028	0.987233550363833	0.949025161831969	0.961245520673337	0.995091773605429	0.987733496940611	0.99124577491474	0.977844182439977	0.987548753395965	0.983367973489113	0.995167508444819	0.972776377425419	0.988151423372563
CHEMBL1794455	0.949491187443117	0.839960832817976	0.980051847783541	0.929919459692185	0.954761904761905	0.975511207848164	0.872273558387543	0.966269841269841	0.966120476533332	0.941218431099073	0.906462585034014	0.950067708958435	0.94409941395074	0.944160997732426	0.972578661494565
CHEMBL1613998	0.895234463457354	0.843595652823033	0.904228372061423	0.948969267494178	0.968531388468048	0.866688483673699	0.943732386501434	0.879212243593447	0.788915636359429	0.926299611279274	0.950744977062209	0.908973764409364	0.942269153975918	0.92637774888405	0.80727084609491
CHEMBL1614056	0.517985426929392	0.217054636181958	0.783333333333333	0.812893356643357	0.390140682903841	0.849444444444444	0.687176634114021	0.311211029467608	0.585334548492443	0.770156926406926	0.362019090801986	0.768452380952381	0.680913220551378	0.321878121878122	0.466309523809524
CHEMBL1613903	0.45874927958632	0.293875727314195	0.468448603119656	0.534111543276051	0.329466595768066	0.620388671241557	0.479851168992903	0.295849497266293	0.545581203544542	0.571467404826769	0.42405835776424	0.574323278724759	0.452659600735799	0.551301638649162	0.55330318556285
CHEMBL2363184	0.223082310661712	0.420684473521164	0.221413956413956	0.221667281993369	0.494307493169	0.663195488721805	0.28001300311138	0.390243335946461	0.475079365079365	0.186898586163292	0.35216134202807	0.249745517640254	0.398333842083842	0.437658437305763	0.698787878787879
CHEMBL1738619	0.0729166666666667	0.250651011932252	0.158046162762187	0.540204678362573	0.321272094865445	0.356010327391906	0.547916666666667	0.454294899947074	0.231824040157374	0.534632034632035	0.423293333518652	0.361303549964541	0.547916666666667	0.365413834154431	0.37453533631283
CHEMBL2363227	0.409104136604137	0.494872166786823	0.452096977096977	0.584820734820735	0.552838915554433	0.711693277482751	0.786698894420034	0.503455919275503	0.595747643786859	0.425769086880198	0.38574866428805	0.65382047289942	0.757958699021501	0.527160345179625	0.638934553530787
CHEMBL1738514	0.895571633434234	0.770669428086186	0.77789431274589	0.786435881206852	0.78763178913324	0.884542341470348	0.788282302705223	0.649224766213444	0.734976308181861	0.847381636074667	0.672057493325661	0.770270961740348	0.806369148882947	0.668661229939952	0.697156367299339
CHEMBL2114927	0.0166666666666667	0.24850912975913	0.123222271178614	0.0192307692307692	0.583750141855161	0.178443686294126	0.0277777777777778	0.372175735854983	0.364986854780903	0.02	0.377357106181181	0.582575159045747	0.0263157894736842	0.56874387254902	0.188723631855888
CHEMBL763093	0.859957880491378	0.842053178947042	0.987001050420168	0.931140765718983	0.909640998307714	1	0.847530545213293	0.810278243582639	0.973161764705882	0.861089895180691	0.864572159943891	0.977823367109081	0.879403737364875	0.7998249842697	0.99077380952381
CHEMBL1614525	0.600921855075081	0.818553139271103	0.506682174226034	0.750517532083309	0.771009741301051	0.743056891938471	0.657562334911321	0.726322510259405	0.841089585263179	0.67376625433178	0.770419207861263	0.572924064526232	0.6479244941408	0.708111929369774	0.74752336216797
CHEMBL2114803	0.972906354895379	0.906761182341285	0.922568174763952	0.977872500818421	0.945274598793987	0.93950982362816	0.974615039505385	0.950815970919036	0.927667351665511	0.948482029781964	0.878366010090497	0.943144591981893	0.970848887797237	0.964268017780653	0.931925580930365
CHEMBL1613775	0.931535261964066	0.769277806989934	0.715038544328569	0.96927672833768	0.924990360743466	0.89819713233027	0.956822881772441	0.937972454654785	0.913665565665256	0.959504921267941	0.94127969369566	0.884009100376747	0.947675873689144	0.882642530002778	0.915045715887747
CHEMBL1614373	0.560950484773265	0.700689401305057	0.718924852544311	0.743445012549322	0.784766382193173	0.65017794031388	0.701905265690729	0.82452337925746	0.71005100239432	0.762613245527157	0.85682457844483	0.692851246604111	0.74657652186309	0.825221319997944	0.693319479967245
CHEMBL1614070	0.963921335075181	0.897376543209877	0.833333333333333	0.951968437545361	0.988271604938272	0.504166666666667	0.876985194292886	1	0.883928571428571	0.906261473569166	0.975154320987654	0.811011904761905	0.904728818190357	0.865299823633157	1
CHEMBL1026934	1	0.999191676670668	1	0.997400109469075	0.99916684020547	1	1	0.999191676670668	1	1	0.999587671803415	0.998430769230769	0.998652753282383	0.998298211070189	0.998430769230769
CHEMBL1026933	0.938095238095238	1	0.708333333333333	0.919642857142857	1	0.791666666666667	0.894444444444444	1	0.708333333333333	1	1	0.791666666666667	0.938095238095238	1	1
CHEMBL2363723	0.54079651415382	0.527384910723639	0.714078694110663	0.541319123343117	0.606314122481737	0.855339706732895	0.723687182382835	0.568823494331026	0.691420248997648	0.602013866187207	0.622496943888924	0.726816908581614	0.738045046740699	0.648037393137661	0.737824952824953
CHEMBL864855	0.974206349206349	0.763888888888889	0.911046041192786	0.943650793650794	0.763888888888889	0.947011671179112	0.926984126984127	0.902777777777778	0.944285480591944	1	0.763888888888889	0.968210068211058	0.926984126984127	0.902777777777778	0.868519405712649
CHEMBL772766	0.255357142857143	0.396382335104457	0.320454545454545	0.290899725274725	0.302737338239891	0.548787878787879	0.354924242424242	0.666108837462918	0.407509157509157	0.190371762740184	0.416084781268362	0.308311688311688	0.309099264705882	0.462582948845394	0.401031746031746
CHEMBL806152	0.985431235431236	0.934579725829726	0.84265873015873	0.976753549480822	0.887377344877345	0.887301587301587	0.976753549480822	0.96125	0.773063973063973	0.959995055449601	0.944193306693307	0.668205868205868	0.976753549480822	0.956870629370629	0.776109307359307
CHEMBL1613812	0.992547217089796	0.970494782994783	0.898115079365079	0.99835757916098	0.884263421763422	0.985243055555556	0.998918041576235	0.922854691604692	0.861656746031746	0.99835757916098	0.966328116328116	0.985243055555556	0.999465312945573	0.929730917230917	0.898115079365079
CHEMBL2363265	0.605816463056208	0.584978608541382	0.708637034000114	0.901685582935583	0.579463582020378	0.816217176061668	0.794747380099547	0.674707404051539	0.646216198907486	0.80794252044252	0.490694982036756	0.743141052492965	0.786812164443743	0.530137981312931	0.694645275782902
CHEMBL1024480	0.166666666666667	1	0.108906525573192	0.0625	0.166666666666667	0.093218954248366	0.166666666666667	0.05	0.118590668590669	0.25	0.166666666666667	0.0706435472739821	0.166666666666667	0.0555555555555556	0.0886721973678496
CHEMBL2363541	0.289082880975847	0.398339031927209	0.550043783263759	0.41060793781382	0.586257929862749	0.641465198311906	0.748200493725342	0.595293777018699	0.472926068815919	0.360235774206914	0.547565920891957	0.560442515716918	0.783536422425311	0.562725000186759	0.466236549872936
CHEMBL1614177	0.0277777777777778	0.0714285714285714	0.654761904761905	0.0357142857142857	0.25	0.480699855699856	0.0555555555555556	0.0833333333333333	0.41484593837535	0.0357142857142857	1	0.85	0.0384615384615385	0.25	0.485846560846561
CHEMBL1804798	0.816666666666667	0.920454545454545	0.910808524511733	0.591666666666667	0.920454545454545	0.864433728036669	0.902777777777778	0.912878787878788	0.888900367309458	0.6	0.930871212121212	0.587843484501239	0.902777777777778	0.906517094017094	0.970643939393939
CHEMBL3111191	0.0720554056080372	0.10964261300481	0.125	0.167857142857143	0.14847250783691	0.1	0.0575793650793651	0.110806404734793	0.0833333333333333	0.0657355525299074	0.11327593302812	0.0833333333333333	0.0561488411488412	0.101623493694285	0.0833333333333333
CHEMBL1031359	0.994572713742511	0.943650793650794	1	0.962066863438128	0.943650793650794	1	1	0.906150793650794	1	0.99938262195122	0.906150793650794	0.989935297215458	0.99938262195122	0.906150793650794	1
CHEMBL2363544	0.593866611053286	0.378382931040453	0.555344210484899	0.587020507045811	0.290830340910409	0.489920288928634	0.704640131329094	0.375165752022634	0.455458909634385	0.46738152939881	0.227118858029762	0.53779463241126	0.625986749510564	0.378984679794557	0.474606343619381
CHEMBL2363339	0.682661577113976	0.759707333516157	0.461067420234087	0.543424216177699	0.780243775929131	0.750777925777926	0.835259152079804	0.84568185420817	0.596184475473691	0.570902171770811	0.718179705030964	0.684349595496228	0.783091306698118	0.780015708634904	0.597308505764388
CHEMBL2363169	0.375306983491337	0.682786797427059	0.612075438894324	0.512994019551514	0.854552572143685	0.800066113224008	0.610324817726133	0.752740615912523	0.771558252930802	0.335857294270481	0.820663879455955	0.632248161672826	0.484762959671048	0.772815415449627	0.794623404917523
CHEMBL2363165	0.558435802250292	0.496229777757932	0.457756649668414	0.820712359819369	0.809338578088578	0.764814814814815	0.688423636116172	0.612056784589679	0.285805860805861	0.493293759900769	0.668966970529471	0.741283308195073	0.732735293776484	0.718150598209952	0.409009563421328
CHEMBL1738313	0.602159936554673	0.642981174386048	0.419995188323112	0.788857346357346	0.714817355977662	0.564414874393759	0.506669375014963	0.652423336561366	0.397120377408076	0.595708874458874	0.644994469795701	0.46299514608655	0.617978749095702	0.739919729609229	0.387126219498788
CHEMBL2363531	0.522246588824129	0.556805594142471	0.527935275942522	0.692592641276852	0.516340252982311	0.793641173641174	0.694653263403263	0.616196566317943	0.641136939447053	0.58145139126161	0.406673574418236	0.656243266537384	0.639563099072516	0.560467621292139	0.717868324008675
CHEMBL2363621	0.436164896803793	0.592132590256319	0.644003043340772	0.418153136587956	0.533167501415655	0.74776763483171	0.737227411733341	0.554185018232862	0.669413309715167	0.43733694756422	0.506932840521471	0.629476140402998	0.72287071863679	0.613940083074888	0.620650598729338
CHEMBL1614265	0.893350884282705	0.93864771834079	0.937737345222615	0.694503963831955	0.946265676438433	0.818959557362407	0.849488294755154	0.884147031998174	0.87197180759016	0.672838152001407	0.856372967887044	0.943077644672715	0.696095119852474	0.922819194469224	0.900971330383133
CHEMBL1738092	0.887038435802289	0.809897011617336	0.940933046257276	0.964199076876455	0.861683112286735	0.848546340522923	0.927138898038419	0.877023930226859	0.860655410182315	0.97066248077747	0.91245575535626	0.963459998966203	0.930215826138824	0.862805237098738	0.818064406327221
CHEMBL1614380	0.741666666666667	0.800585525585525	0.444171788720661	0.793650793650794	0.885539117877174	0.287471338185624	0.793650793650794	0.950175892483585	0.359779803529804	0.745454545454545	0.723355513104107	0.398253532182104	0.745454545454545	0.839960564333474	0.525854875749834
CHEMBL2363420	0.721290323346245	0.623042255796282	0.524146517588456	0.959129383661359	0.756702336250436	0.741401028855739	0.793192405962898	0.668412698196877	0.595769034316235	0.78885749409026	0.785243216607197	0.682532299030145	0.784541221753393	0.651937093989421	0.612061471137558
CHEMBL2354307	0.937797981984871	0.941582038764745	0.96919702110789	0.953837630406028	0.939098893890296	0.95508539053348	0.944196380121516	0.955612261536343	0.845796745917598	0.887474506843013	0.907992473576042	0.856834376451698	0.943951954385959	0.924490995394929	0.823559913041948
CHEMBL2363375	0.443956417894111	0.608964086935406	0.829217069652054	0.626036197746556	0.601703289672806	0.848746978866544	0.614306146751799	0.539880259155878	0.789698676950595	0.471576588298556	0.526379826060566	0.862398584263236	0.506361480693743	0.638405710448093	0.817397106209127
CHEMBL1738423	0.329696499153021	0.531966435370313	0.247356840463458	0.402218144174666	0.414573297120539	0.184543053564793	0.363769093225615	0.333371309233863	0.138653242301155	0.590397139092791	0.403772623473445	0.17266086596582	0.342125356125356	0.396022840324276	0.134402352395231
CHEMBL3214828	0.687640018221556	0.741935698169998	0.865642584422489	0.78036981793161	0.836975398113611	0.928027023481569	0.812144288327025	0.857601088760425	0.659439312915249	0.887630911289152	0.567738697808908	0.706279242642879	0.91547585648629	0.826134384742418	0.748797199923009
CHEMBL2114883	0.773921635262215	0.526382556227538	0.77288091517578	0.847996626853341	0.595023997187784	0.727966256624282	0.647914426399156	0.485491873264974	0.7089550647698	0.787170225920777	0.430529467327272	0.726896587749043	0.670000587266358	0.501235033657418	0.76012628633462
CHEMBL1614408	0.829085147103734	0.841841751892248	0.613694113834667	0.728174542337874	0.79331253826394	0.72969301713278	0.683024596992404	0.721768924440424	0.626153555287755	0.701883597951296	0.82193212283996	0.594932962103584	0.739463649377908	0.731057255122003	0.633340911214806
CHEMBL872182	0.985243055555556	0.926240079365079	0.954014415072107	0.973611111111111	0.985243055555556	0.947471118624965	0.985243055555556	0.901835317460317	0.774697568645533	0.968501984126984	0.694618055555556	0.644917200102959	0.973611111111111	0.859573412698413	0.774697568645533
CHEMBL2363299	0.730628422869696	0.743902733500578	0.377473896424431	0.933116124931141	0.760471241735196	0.586713641887087	0.726667411908892	0.666889534284224	0.597632225172332	0.770317678599057	0.686761309787242	0.674068313710869	0.791619728698622	0.602657836613254	0.54783646709484
CHEMBL1820680	0.85	0.732069354484127	0.25	0.793650793650794	0.711531251859538	1	0.622222222222222	0.813212613355836	0.25	0.513888888888889	0.745754443180253	0.166666666666667	0.513888888888889	0.678088631494021	0.25
CHEMBL663474	0.929183739549369	1	1	0.969021804083941	1	0.513888888888889	0.969217861397889	1	1	0.962013571486404	1	0.513888888888889	0.962910904783768	1	1
CHEMBL2363268	0.672088483635519	0.600872724977144	0.749355261524694	0.78108218381284	0.722588235257769	0.712281875237137	0.724388523872935	0.76477287684998	0.631845158979315	0.75772029665785	0.751032563613209	0.773467303013567	0.732599118379134	0.707139817396772	0.69774729705402
CHEMBL2363393	0.383394940129808	0.568699918883742	0.547830553948975	0.487002738976423	0.628068629375788	0.706316267126241	0.774685746352413	0.592735729112075	0.552434795262453	0.562176375973096	0.610182910656732	0.615188776756119	0.713549353223266	0.581163710672239	0.567284231301441
CHEMBL1737862	0.864039534130872	0.998664907240673	0.893283741255877	0.962423991217003	0.997659366068673	0.882686940557785	0.89599973305783	0.998626733958357	0.884971149707992	0.947615699424489	0.998148547841873	0.847351770008971	0.939027831353727	0.993449005690397	0.929366002504547
CHEMBL2363642	0.522214648794835	0.455711549312261	0.629777224027525	0.556905826762286	0.62864881347913	0.711939045403892	0.667338351753635	0.597445008776243	0.696075886551075	0.540214051030462	0.52773161306038	0.749180776529175	0.709439775777928	0.625291595912399	0.678069111534798
CHEMBL3215144	0.775287150268106	0.746713503630663	0.89920530499664	0.916792999109692	0.897290908317742	0.945918733962299	0.891234085493077	0.937351511142723	0.979564967852444	0.849202253101383	0.796663541007937	0.933477232754409	0.895257196829182	0.90181886691039	0.94270152824322
CHEMBL2363467	0.611000690705013	0.712022930772931	0.713304009877284	0.707543175765453	0.965670594837262	0.853390032248944	0.79987315024225	0.903069384319384	0.819034162554729	0.598949016383227	0.870168274819809	0.52862695520672	0.762734277637177	0.957842312008979	0.842445235843453
CHEMBL2363174	0.577762302053275	0.618910356238297	0.581220159919272	0.568800838722441	0.734923908613742	0.73365489473789	0.658736290137062	0.736302017885963	0.667105133501455	0.51825268892571	0.693647709174927	0.581308826549717	0.709285931182483	0.699554691561695	0.626613456595453
CHEMBL1614417	0.902533345372794	0.752360393164316	0.493559587376289	0.795467791345512	0.85982258514591	0.641845287774481	0.886359157027631	0.838812741812229	0.757151719791341	0.897675710539398	0.836232184736623	0.636839530770391	0.888850741623428	0.768322449231523	0.768321133226825
CHEMBL1614539	0.942608751857404	0.917921928116241	0.82390807748538	0.93788493671763	0.881363941627507	0.877681640013538	0.937683075547471	0.834062824497315	0.92552886771274	0.940777777671287	0.863560911324476	0.778890717394491	0.963650737401958	0.873069340315144	0.95811633421081
CHEMBL1738684	0.917092256264666	0.991108706769406	0.908837873266596	0.877655575046813	0.983857899629943	0.943244889598341	0.967243188967371	0.973846199245334	0.955561531917795	0.951035615759578	0.96161033285517	0.948225656002662	0.961104706147321	0.956997079527082	0.956234068154899
CHEMBL3214981	0.916433119051832	0.995525759103128	0.96892361081588	0.875643320629636	0.980778379353814	0.986992946861058	0.880467477042631	0.970393921497995	0.979605390968476	0.903407672294411	0.971784799853762	0.967891625247553	0.873149206837144	0.989486693414472	0.914206804104481
CHEMBL2363321	0.231674911119174	0.233823366908921	0.536782652845455	0.322239738715703	0.630508658008658	0.675212514455393	0.452541586349682	0.466072515212982	0.68007596150871	0.323011592533974	0.301999185402411	0.484205353158994	0.408727828001227	0.407206386725992	0.680885273495222
CHEMBL3111197	0.153819213085662	0.0600408822510091	1	0.211256225442248	0.0883494840681208	0.0833333333333333	0.17528192151037	0.0586307732871394	0.1	0.193266094178149	0.0923316193535088	0.0833333333333333	0.145738477478605	0.073999151544218	0.125
CHEMBL2114718	0.831031856075918	0.823528059687249	0.8207546591738	0.764994806111185	0.838881627212039	0.877984300795235	0.809524407096448	0.875733111490535	0.920912566535027	0.823673424091122	0.880252751204318	0.855279566467265	0.832515801264811	0.779722416366318	0.90635234818486
CHEMBL1963857	0.858322671948334	0.961454644315803	0.649696371696136	0.980841431642347	0.979383130528625	0.764670398830616	0.916984222391793	0.956584843905799	0.791522577514682	0.958222077368497	0.842149313730493	0.877745127011123	0.934110680677513	0.925140962919796	0.844839710114861
CHEMBL2363453	0.50274979620408	0.57000311794173	0.582182087348496	0.537907011289364	0.692476173336467	0.802034101519396	0.422743233557378	0.577500992750059	0.564975875002191	0.493580206343364	0.641269467178388	0.670337002179107	0.432244869101487	0.62518160266625	0.669806841709016
CHEMBL2363176	0.834376767228382	0.611438071779753	0.765700407558676	0.841984669709561	0.575944882495395	0.822509612243723	0.89390870454213	0.699293903145227	0.819534924055959	0.837653374785271	0.649714868648243	0.783142410884714	0.883482210358304	0.6700605281393	0.823150969842988
CHEMBL1963849	0.991427375014968	0.825154019943389	0.818940276720726	0.981770689131395	0.879241720909188	0.792557166561247	0.988019481746648	0.874420786843211	0.784202871471075	0.996421476111502	0.881930936198925	0.690744236475838	0.986113193590359	0.881108268103349	0.758181106222968
CHEMBL1614210	0.458318990992141	0.432603989625703	0.261214896214896	0.534549388775065	0.575693438039722	0.397154293837012	0.440447876957766	0.392160649591275	0.253203321239527	0.52904300737223	0.485239763089093	0.314403760063225	0.507364690053666	0.394966057497486	0.236829236787218
CHEMBL2354260	0.553871121687141	0.378906500102152	0.424106646387736	0.557265501828783	0.470721130642273	0.369301817922468	0.645710249551616	0.364384480536273	0.517914571228647	0.594208503710412	0.417642609671595	0.45029025866009	0.587701063288663	0.317870452004701	0.572113130842795
CHEMBL2363449	0.187531198686371	0.387404179473145	0.195973486921763	0.121696753800334	0.77797385620915	0.697775484462791	0.377229225023343	0.54984335839599	0.484596170561083	0.128856904247258	0.662382102599494	0.60548433048433	0.393687996729792	0.538579916815211	0.634830447330447
CHEMBL1614482	0.848416959803448	0.312467818199792	0.634367487660831	0.858149523850598	0.68516081871345	0.816225451279799	0.934242498281775	0.643826451326451	0.645245019352192	0.76415816546225	0.659985511321038	0.672809145363493	0.949742734034099	0.521903722495828	0.662774599299535
CHEMBL1614220	0.842507277671005	0.705469731760304	0.826047237211716	0.8384406378834	0.689173766169672	0.88722067606801	0.742004041260496	0.785180996948539	0.913650314865344	0.884216486002852	0.818935748614818	0.952237183260856	0.843683364331481	0.686391629555797	0.922061402925223
CHEMBL2114914	0.776568034700164	0.8665677957163	0.884045285366127	0.907479836898078	0.92194804270409	0.949182987111805	0.798204409730321	0.924196754092834	0.927621632612647	0.789205236797226	0.799135700578494	0.835993044246078	0.814419294432172	0.858605288001012	0.917265999657329
CHEMBL2363438	0.638098147290881	0.649487720221405	0.780758374223221	0.621972566198525	0.63261192143259	0.800848507930551	0.783263256624175	0.743811481009232	0.709510416488051	0.683762465508978	0.598145745993258	0.816072221294357	0.755222150368805	0.703792222166681	0.706262780784307
CHEMBL1613956	0.535074097646433	0.65747075648599	0.541254143558043	0.675229531128418	0.813903765400607	0.66723220986453	0.565422652020789	0.888708917215335	0.674620909293387	0.690190410165677	0.766639953729854	0.749967254749359	0.553218330667645	0.830918953080772	0.629754898366344
CHEMBL1613806	0.835830354155499	0.599293040630365	0.677984949964848	0.834563848577202	0.824290930254852	0.815572695075801	0.896720625810741	0.738503877396337	0.80345259936852	0.869139780730187	0.790350448207249	0.770238192064096	0.866798677540964	0.73502681845486	0.698669464792152
CHEMBL1614450	0.967496000001761	0.82165289424894	0.887712642567581	0.939762636665298	0.916889266590043	0.944764566980616	0.939306914971668	0.879515401779676	0.952209385536546	0.952455976311762	0.814695360121032	0.914906706657499	0.942017489386965	0.795382746974062	0.95660610426075
CHEMBL1167052	0.851390067534722	1	0.902777777777778	0.976355090060898	1	1	0.948537362467951	1	1	0.980824937402852	1	1	0.945297235947294	1	1
CHEMBL1002712	0.992163537113718	0.973553849684232	1	0.993327991452991	0.963757324823432	0.998548104317335	0.985273326210826	0.952160352876495	1	0.989749135848742	0.972908234590325	0.99703922857769	0.998298611111111	0.956984335544722	1
CHEMBL3111194	0.080055999128862	0.113790938635279	1	0.100541632878682	0.130159261998627	1	0.0851775440807699	0.092445415545064	1	0.0895537264871247	0.161739714237639	1	0.088968259709639	0.167319097155754	1
CHEMBL1613859	0.434619565529561	0.596251904431375	0.465603318250377	0.506650690579262	0.69051506421282	0.624404761904762	0.510858585858586	0.64876894063722	0.18889880952381	0.455723443223443	0.422983409617603	0.375823443412453	0.550590084518656	0.569255300370066	0.237430078820239
CHEMBL2363146	0.26342103208909	0.381282038323101	0.591119076860871	0.377145548050111	0.464147270199457	0.692038155854453	0.648053398044555	0.4585236438982	0.51248584934429	0.423694356136591	0.345231094241821	0.540122786916781	0.627977298100692	0.451531228433402	0.578727182162016
CHEMBL2363395	0.271834495258865	0.419470002622177	0.636627402643737	0.276172352881773	0.494150452320416	0.780857293825208	0.713729203802733	0.564944493214617	0.636323933907666	0.234881612521364	0.562224430610737	0.568804025053184	0.600096777352416	0.509868453683813	0.602171280028724
CHEMBL938648	0.994862835744675	0.925143664550749	0.929096520763188	0.970768885223771	0.88550202739091	0.899334616001283	0.949829512205819	0.95491959099585	0.895055715889049	0.969440710603326	0.939752410204682	0.929096520763188	0.933418567781482	0.897231637657306	0.943077601410935
CHEMBL1613980	0.300258326574116	0.307877225046981	0.0476190476190476	0.173724570670441	0.296507022792908	0.0412917978707452	0.174743637863394	0.212277276810831	0.175595238095238	0.209030957918611	0.239533319518026	0.0752873563218391	0.23808505586426	0.20413047266123	0.0538628038628039
CHEMBL2363581	0.575861748644144	0.805637528726231	0.651695042930675	0.547535568834179	0.877917694222042	0.828967959237567	0.572448527260967	0.762969715469716	0.697520350522746	0.564930667354713	0.780992224696935	0.618338136573698	0.571986167002124	0.7224099558605	0.696418365585032
CHEMBL3215132	0.963623967354001	0.91246109837787	0.926054699399254	0.951104151821926	0.939187647517076	0.931106866101089	0.942295991952801	0.953870040384875	0.924491106351295	0.954669133921146	0.976604284519337	0.899986636345305	0.884843990712291	0.95710577258605	0.914770492722967
CHEMBL1614267	0.726151799285506	0.841618383432228	0.814422821828653	0.76282122732339	0.895065191622375	0.714575645083213	0.76678335473523	0.870457157477775	0.784096569288239	0.696911695873731	0.918471311267228	0.740282857240767	0.78076783589762	0.850640727775228	0.727627437920579
CHEMBL2363277	0.488841056626663	0.716371671361506	0.735727269206484	0.543448635011203	0.830212176626392	0.784389529249178	0.657858229096638	0.746934966238258	0.789013251998546	0.575735462065645	0.681913803348514	0.696168867974214	0.713496699393037	0.741644067554757	0.734592827888224
CHEMBL3111192	0.104401223776224	0.250202067180412	1	0.185221304430863	0.27216540134498	0.25	0.129434965619176	0.10400631760553	0.125	0.205635075176316	0.123657631364772	0.1	0.104620573296295	0.0564488676931619	0.1
CHEMBL3111198	0.163052396842064	0.31307562199859	0.513888888888889	0.327534880736773	0.3988885866145	0.461111111111111	0.338444608904168	0.32932582738566	0.711111111111111	0.718083536833537	0.403275711067504	0.85	0.393549219722094	0.280630483945872	0.902777777777778
CHEMBL2363153	0.739075348756761	0.690541442818705	0.85247989426008	0.916590628195007	0.602726539444207	0.909448094438814	0.851150948565281	0.675857268800346	0.815475174140345	0.879254633458942	0.662648076733757	0.859265032895879	0.847587367276544	0.671823294181149	0.871248330815709
CHEMBL2363197	0.425473675784978	0.360431951560984	0.438388734638418	0.522447101736317	0.472549925491882	0.642226455609608	0.63482059797696	0.448077046910718	0.512490017936999	0.305667839403391	0.189910263613568	0.519031549008666	0.634660189068402	0.466200003700004	0.527103339583359
CHEMBL2363371	0.384655796188619	0.418149636899633	0.494788386663883	0.400993752764264	0.530712051190549	0.727994520930902	0.722610953860954	0.515398938152796	0.448763118725075	0.301053699679377	0.46645763980009	0.730725546383441	0.733657806314056	0.418071032970136	0.525783344765543
CHEMBL2363734	0.40026588240443	0.61293942698502	0.701751604105911	0.684721730665147	0.643414950783988	0.812062938128615	0.736472757223745	0.631556413781944	0.680479786657247	0.645125691173122	0.781649886076711	0.838651303971987	0.623095563457428	0.625203462036777	0.83728143065157
CHEMBL1614478	0.994966161532643	0.927504263926394	0.909245936962243	0.990896824269449	0.929285726781582	0.967561086625569	0.994245892391321	0.93916612947577	0.967613069329532	0.987652123853835	0.957676935100014	0.93769269415345	0.988337822987164	0.904715879584696	0.972549496084451
CHEMBL2363336	0.396601763969453	0.656029690006963	0.581084000777095	0.776493860560963	0.695082099601225	0.644634137518672	0.701690262048985	0.751258516556152	0.488660701715362	0.76873982798013	0.767874593345156	0.743052012442852	0.6913766495524	0.770820519290094	0.525957488816341
CHEMBL3111195	0.379649023098976	0.44352528748049	0.795833333333333	0.282028671916056	0.51294367092557	0.795833333333333	0.393697742344179	0.308083877680181	0.795833333333333	0.480457792526758	0.448254749578574	0.795833333333333	0.354825450599444	0.312466909633953	0.795833333333333
CHEMBL2363278	0.61935268907037	0.729761949164431	0.692908726378059	0.686284224465827	0.693649945741907	0.714589926790635	0.85469568251414	0.789603677539134	0.624967029344598	0.670152662872262	0.634131852568403	0.72347325313138	0.855810153188393	0.707762527604948	0.641591349132301
CHEMBL2363351	0.723975300340578	0.696473993644854	0.635420832902747	0.707337543232248	0.736711878604987	0.730015666185921	0.879714476185975	0.707415158442126	0.666648895042756	0.778433347158623	0.721594524062236	0.766370741216398	0.825960390481653	0.735410712666057	0.670534340644577
CHEMBL2363391	0.630398532922964	0.655535270059823	0.584291297443274	0.672716280028161	0.621252804826888	0.724927401783196	0.67510359694758	0.645371575504568	0.644428756616902	0.627778734423294	0.536548635247777	0.644477992794148	0.748898968242951	0.632455202896245	0.64658747867894
CHEMBL2363326	0.725638338285059	0.562612581994415	0.606251060574113	0.750523778321541	0.578384376000732	0.755961159425449	0.748918990226557	0.665258789941499	0.587644972125099	0.459635909585321	0.569396317322332	0.695327909470439	0.675417987763662	0.59556784235941	0.677411418656949
CHEMBL2363328	0.223284672940033	0.459343114213744	0.558247544983079	0.243971168132415	0.61201186036456	0.635332507166746	0.538165075831485	0.579618163699046	0.76506026867869	0.22828389192281	0.660520844686406	0.392584124901101	0.510951520529694	0.594474440912848	0.664588032581454
CHEMBL2363330	0.563669280994169	0.698672972949541	0.616799583856663	0.677618027922466	0.677454317773048	0.738705106314456	0.820168915398141	0.80621605858189	0.744761320030956	0.609089726956308	0.549615278021075	0.693399250824596	0.797260767585536	0.741346856393847	0.71579590321028
CHEMBL2363364	0.298029669967056	0.568596000301734	0.379947291741959	0.362348853765988	0.703209381261361	0.535426172268277	0.539297243672244	0.544266082544019	0.467730722365684	0.497991517234938	0.660794702113872	0.532197979862212	0.546124266059611	0.60754781083595	0.498227933469542
CHEMBL2363333	0.638821812368992	0.539647072724609	0.510520477952865	0.642162508400899	0.691601810569331	0.639337753258519	0.750213853798993	0.68263800660047	0.7967488882138	0.609281633210022	0.652479653307865	0.507123811960894	0.706281057561614	0.633323196387699	0.821884829932784
CHEMBL2363148	0.428930943974804	0.502217554931423	0.45737113076524	0.526582253218532	0.619272701028882	0.625182819151343	0.665191081320114	0.594630597036288	0.428154400418975	0.399349087115988	0.347430392407202	0.534977854065536	0.582629881881243	0.484399793030604	0.507737804919485
CHEMBL2363264	0.553219986448935	0.513051345620214	0.374271790125044	0.467221505671326	0.679042663847141	0.640601253321842	0.57515123099048	0.578394182884082	0.506590082060725	0.448942817066021	0.587837321150553	0.633872340323953	0.590964257055607	0.637719896973868	0.500448445603763
CHEMBL2363283	0.64606170222569	0.593685455941877	0.862621336554136	0.843063513910553	0.636384968240684	0.851046955133484	0.705209425741652	0.614785187122754	0.724944748238616	0.721179114243509	0.615165961491144	0.766977467836601	0.740959201097258	0.529860841527156	0.805146346727798
CHEMBL2363660	0.714343243897569	0.571446470391308	0.703369103928647	0.726210264915344	0.613390358560225	0.819877744737394	0.712132230828555	0.632094585472517	0.667748393602479	0.712251798980337	0.556656987067175	0.766899004160614	0.723584763204919	0.596150699942684	0.752588205462246
CHEMBL2363307	0.569669763759113	0.538541270902124	0.613405857983232	0.482874933822969	0.590946346376748	0.73573055019456	0.714228767865132	0.642394573020345	0.557074103754974	0.610420928531542	0.615624809541701	0.685732270605697	0.68281816266006	0.622816064170962	0.596993523650039
CHEMBL2363247	0.461086471487969	0.665450811807857	0.606544940427999	0.538959034367921	0.729200393427653	0.759404086039191	0.553200473691899	0.774743919895078	0.598861805964418	0.553609870341307	0.71413231924872	0.591965015215991	0.636577532450585	0.736012499133209	0.639710615429729
CHEMBL2363465	0.531826402425818	0.665478910927249	0.529004838577434	0.552592559078066	0.525747974838094	0.791672077922078	0.614505864505865	0.602338206962864	0.565051271827588	0.600883401314987	0.533845345958977	0.643329614604462	0.598641303673385	0.571633320448506	0.573399740711122
CHEMBL2363225	0.288352529117327	0.611636218094756	0.494716628428635	0.321098043261087	0.622875565104267	0.678697707166377	0.441112152451711	0.690950475391284	0.635015559614714	0.371494244946324	0.490286450825009	0.609708612610087	0.446663300485896	0.573725489116654	0.629993492456579
CHEMBL2363468	0.430962378597578	0.53902431505882	0.639988820575232	0.457178755884638	0.582488922395793	0.672663214477247	0.695865662299267	0.585515423000816	0.63243502465163	0.373533197581572	0.573117839838607	0.541069311278928	0.687790305638384	0.60860351206952	0.659682671443018
CHEMBL2114826	0.509518494495614	0.756424378091045	0.6780356572805	0.773768523371095	0.853947289256214	0.782284077092474	0.539502891311568	0.832016759918564	0.718208913123554	0.749269072246311	0.775529308731714	0.739890465365984	0.617104092456694	0.813754762781079	0.746148409166011
CHEMBL3215266	0.941904155122121	0.925854766998273	0.978188530316645	0.957508499040652	0.919204128487914	0.963637353487784	0.943254274164561	0.944191638995682	0.900889589750474	0.898245724993711	0.879065571870312	0.857679782687267	0.938144411473248	0.933230565004064	0.851255881532564
CHEMBL2363731	0.29849027776779	0.517737328393663	0.504150763026912	0.389939949030858	0.710050672501265	0.640692222580767	0.564008930018288	0.531101046983808	0.576254130639449	0.316423859202667	0.522010234192836	0.560921699858866	0.597813665093077	0.588324448505832	0.580743637055373
CHEMBL1614479	0.999587671803415	0.956443634500237	0.994289294381887	0.993295203460741	0.964110609625532	0.981512105993542	0.985852098763757	0.91692727092704	0.995801640060899	0.985014307490378	0.972635657418266	0.985631018807135	0.969086070634559	0.862968089689385	0.995801640060899
CHEMBL3214782	0.87837205916945	0.925294525197706	0.921729182581586	0.808875579152312	0.936169439360272	0.949290609726821	0.768538246858257	0.913984249504005	0.936796514570656	0.788389551123026	0.903600814378099	0.887146601149439	0.75987543420225	0.98253488544394	0.917264788848125
CHEMBL1614273	0.412443449711066	0.440256461272757	0.482878401221313	0.502773502874939	0.483836019424244	0.507764086227294	0.562920136941092	0.625096830164351	0.540041728990395	0.702192084652525	0.454869956262212	0.524269546872423	0.63345829937809	0.429696756188069	0.468374113771074
CHEMBL1794400	0.935086283953742	0.813330232268088	0.723959368952372	0.93720821498143	0.710402181574101	0.757399237492258	0.933051773743722	0.692017882955365	0.809994080233308	0.963995738661233	0.700425701349299	0.790910149449347	0.957609739972022	0.748600523218685	0.839779795060867
CHEMBL2363728	0.513295955567824	0.684101476358485	0.614952572163683	0.674341398149745	0.674280061046346	0.714489233735509	0.823786874630196	0.795468302117347	0.759673676126776	0.553695640870783	0.636186125934765	0.642306160294365	0.696361840896311	0.735770696651212	0.745614768409938
CHEMBL2363568	0.586140364524357	0.558457060675317	0.670041358423711	0.637658838482044	0.683043853401499	0.779025918260368	0.710734174642244	0.707481227974818	0.640609251859252	0.611227296963834	0.655414442744233	0.639395979837156	0.645255677767328	0.710941662741772	0.67056080283353
CHEMBL2363353	0.536072677640183	0.60478191065487	0.659680854323333	0.461375428175097	0.608090347220486	0.710436101350152	0.72131047944543	0.532184616109627	0.620303704879064	0.488805048760869	0.454293751391045	0.62531647833567	0.720012563343273	0.563736306887159	0.588379080986114
CHEMBL2363230	0.845498270488875	0.768995085215264	0.76651165451304	0.828056085753783	0.767577664944582	0.860320824945847	0.857684587386615	0.733578958712125	0.805576729363851	0.828005339074382	0.814840697763063	0.755124404476573	0.83184205520099	0.794639973838503	0.776895386629745
CHEMBL1670561	0.996635909265667	0.891613362511851	0.981878980517851	0.935255080367537	0.779658439739409	0.952848687053727	1	0.885198596391781	0.975249876072905	0.985206925907618	0.670530805084831	0.951119887677091	1	0.796355993300108	0.972429709733833
CHEMBL1614518	0.644035222846378	0.574728236086595	0.551795198204278	0.638810937775612	0.609570933499251	0.625190922888398	0.561740175619345	0.463449268006892	0.606695361697387	0.717833180288317	0.680836585649565	0.532129074560807	0.582688401466035	0.468306973543853	0.612062430498523
CHEMBL2363739	0.656898782744511	0.793907775642195	0.595942903613518	0.793953672254634	0.717247971183402	0.72169171629726	0.776897134304983	0.843007347829329	0.653993191250823	0.800453178284449	0.758707494594736	0.712639228381356	0.752531448601026	0.739222890934436	0.722132234133737
CHEMBL2363558	0.792155143488317	0.685894983941108	0.789241684957001	0.788006457261208	0.628815099554802	0.793700485936157	0.795330292036223	0.800815076706112	0.859545936946724	0.711608320655167	0.627803765519381	0.767691372623306	0.784454397815827	0.738622456393912	0.864133679737215
CHEMBL2363322	0.411016339503408	0.385831503010732	0.527652427545778	0.349757107931359	0.327303438322811	0.492266343881176	0.646162400894599	0.393131807611171	0.539427039951949	0.350362087386209	0.300549420324865	0.525498704075093	0.650645514728164	0.428020749604801	0.515311303240365
CHEMBL2363753	0.600988980298693	0.618596625809642	0.603029216691376	0.825129978244695	0.670845613141544	0.745244034779975	0.719790121404564	0.667768453821107	0.737495105593836	0.819500844504116	0.726942939571365	0.656698096797959	0.725510504694357	0.599487634291274	0.71992879255892
CHEMBL2363348	0.338038361435078	0.489287211161894	0.651693916712442	0.717718536269608	0.660278283338628	0.772407600617733	0.599705630854086	0.571078218620157	0.623024271050587	0.516013305348079	0.612142427336393	0.712763044422963	0.642879009258485	0.590728521671827	0.666376029047654
CHEMBL1614321	0.40584240534527	0.449264493111286	0.307914671690661	0.534146619646929	0.570983736562636	0.28470645171084	0.54143637189225	0.481774153004099	0.362398514318182	0.528169523516006	0.47984697675145	0.242067153694258	0.514949260812663	0.493944124877455	0.3407387996299
CHEMBL2363337	0.34490803840504	0.542608760197137	0.636411838984434	0.525943001095032	0.592213946810825	0.779449278791384	0.627082625979685	0.604799703441737	0.548327810852659	0.538468702121508	0.620428021402358	0.543493525040432	0.658352856994068	0.589295415549689	0.640489028944911
CHEMBL2363228	0.709607291431826	0.744117321425014	0.758901430526817	0.70888151361183	0.633942509113254	0.809648006866677	0.835622504941943	0.691587486697632	0.867845801541454	0.596127538918892	0.605410918366384	0.723756859656181	0.814538077401157	0.633240549043717	0.820246008721241
CHEMBL2363504	0.456179015924214	0.564908446466031	0.723716092630566	0.572808679366456	0.521951379178914	0.67446615243397	0.572019052928318	0.510774147928102	0.63310998029748	0.463375762162809	0.467491294526882	0.592829003272311	0.57235508320582	0.528441204734919	0.609958523445365
CHEMBL2363664	0.399741896002507	0.703692231632527	0.721398116288871	0.727538035963144	0.776501573437448	0.868169934640523	0.685049161201542	0.751248473437113	0.758519321390435	0.465664621288797	0.724256592298297	0.809759189974876	0.65617224926302	0.758343502973499	0.84318314455271
CHEMBL2363269	0.301157181361833	0.435327909075985	0.570694485269664	0.435299334694099	0.572344923170229	0.83766844771022	0.623747828441504	0.59486669929045	0.690819891041869	0.431498421735721	0.540286605764767	0.707076642471215	0.58153220759316	0.604359504104243	0.751132951209867
CHEMBL1613893	0.528284864722904	0.559863945578231	0.449456783152435	0.635581325161289	0.449954014239729	0.387850748811249	0.748388888788516	0.536239950525665	0.522388353728933	0.611917372808459	0.565519599448171	0.631429249762583	0.568984809357065	0.511963631606489	0.423781967850595
CHEMBL1614345	0.655707600764878	0.72896812845486	0.579255582698716	0.553519252765665	0.752750987557836	0.598342798377154	0.656762787221231	0.864260498362174	0.620661380405342	0.534125550898482	0.681826867298534	0.758767843998983	0.689583451953742	0.84282113556152	0.637597074375632
CHEMBL2363442	0.568176309024561	0.685458921089086	0.483988851562381	0.41538353908065	0.749712099185343	0.64494865774946	0.665115369793732	0.674488841822567	0.705340793797732	0.393176782065671	0.654719996956989	0.58278157028157	0.661631167186723	0.677567883938901	0.638228714843547
CHEMBL2363317	0.444762410879002	0.614276893841297	0.774072299228549	0.586136393123244	0.714897573531889	0.820142257789634	0.762430091392917	0.72514711120703	0.785918279919828	0.795783157518214	0.708578708158099	0.768126702347146	0.705332749872655	0.711777945657958	0.807422310619653
CHEMBL2363432	0.608343545915158	0.704698655388105	0.686364712153889	0.721568934070501	0.748055413736666	0.783252079246973	0.800165493777491	0.832436897793334	0.725700007490106	0.653203690483415	0.685893444782096	0.675553536292427	0.802077026832017	0.800411773434192	0.710684564962405
CHEMBL1614376	0.93039488553282	0.936697047974472	0.9105885833898	0.939092167026342	0.974404744780839	0.979589372983818	0.962265944304296	0.963648021161462	0.965533954967299	0.95090348804051	0.958730902388585	0.945926580885872	0.930111050855597	0.967120524017041	0.987910186517854
CHEMBL2363403	0.427290588877774	0.493796087075472	0.480882197830138	0.400975986111841	0.603394968767185	0.613819759003136	0.605161020438164	0.616490538532908	0.613923914567507	0.429724226301441	0.609737829410486	0.6793532305282	0.616797764010699	0.67122025674848	0.586884564929027
CHEMBL1614355	0.926037613421935	0.991442163199536	0.988304093567251	0.994115448121719	0.877750544360859	0.896957933277593	0.999095230378653	0.988249438741332	0.935846822166482	1	0.838276860150332	0.964308021461014	0.998162608707395	0.877750544360859	0.896957933277593
CHEMBL2363593	0.652492708439458	0.779398482307648	0.683050075341275	0.752564034936223	0.722408373114942	0.739581028310906	0.789782021216312	0.791561901503883	0.814419834534568	0.647665157132083	0.778793236983603	0.726416255605918	0.791170955130186	0.778088697032115	0.78231660876275
CHEMBL2363414	0.675551559967371	0.65670382034584	0.703746574310622	0.908353913842752	0.621152645689858	0.568196500181647	0.869397191784449	0.762017583877785	0.697714130447296	0.830194088471695	0.675017489050059	0.599096055840055	0.86715642670467	0.717061520621215	0.746130502082683
CHEMBL1614226	0.652236842105263	0.425096160579756	0.537760499967192	0.206929181929182	0.481019265574078	0.588825806590752	0.577401261373036	0.358613037654103	0.566752892337131	0.454381250932975	0.635476962638702	0.683656831107489	0.387070481601732	0.439851463605129	0.571634263068087
CHEMBL2363444	0.830662135063984	0.883764029862257	0.816475374056497	0.868039655739626	0.925900215262337	0.846991206930618	0.866258598694763	0.871719819827156	0.896347713295294	0.817912388213088	0.858141137225298	0.871956050177739	0.87697132437225	0.929053095007617	0.911573561742062
CHEMBL1738246	0.99797879985627	0.897098787424937	0.916378921687026	1	0.932838121085463	0.930653704687094	1	0.893825635823748	0.836316813463937	0.995863490922779	0.922316125222133	0.948231174475166	1	0.889601664777263	0.865636076049311
CHEMBL2363697	0.828126194971844	0.708880141084958	0.831391688874376	0.899987126205168	0.852939634258262	0.826910613075111	0.856135058816254	0.730014966562281	0.871605453942915	0.737715187771599	0.735724256309508	0.858843058064636	0.863897086534958	0.872454737157636	0.895242273206669
CHEMBL2363725	0.503955590987229	0.69398894765075	0.626332305193883	0.667505919714589	0.770284737302102	0.771113023097196	0.697311495068712	0.791438150356528	0.688562884388255	0.715301072050588	0.731921514367898	0.609763690566334	0.71412009886035	0.765751973526833	0.733168848511885
CHEMBL2363572	0.481805306133367	0.614428548427904	0.718212995486503	0.553565469305689	0.665631731351809	0.774320022722023	0.697092899554699	0.694903027794039	0.670886030034637	0.439428703660553	0.642303084687188	0.621467555238229	0.720879113340913	0.644858010113351	0.661218490904286
CHEMBL2363189	0.744376579953519	0.7289818370862	0.643121049424606	0.722363198066708	0.712229016683832	0.745945424744467	0.727538734784338	0.708206400426682	0.757910809799343	0.674818194897642	0.58906894702319	0.684819248448096	0.728562354386658	0.695691334604567	0.715937489948785
CHEMBL2363799	0.475755678061427	0.629784180841327	0.778469061486964	0.668014217338452	0.587715170395499	0.867274468450939	0.667334952780615	0.636116622906988	0.60914519148585	0.591154446805175	0.609008331910346	0.872479453094778	0.664664827883941	0.659587362528539	0.753281255706548
CHEMBL2363628	0.240645263698329	0.24439135159742	0.197328520364511	0.38478284144486	0.206838137618104	0.493012445644025	0.379705681404464	0.292106215521563	0.341761251788475	0.316854831101155	0.147703593718551	0.401554325563793	0.408077117540033	0.284370751200681	0.400153133903134
CHEMBL2363489	0.366731842894247	0.387497076650725	0.808667020973523	0.42263091440723	0.574020890783729	0.855499851455734	0.674985551485551	0.481786060015212	0.701143172151804	0.285064830171524	0.566041042758219	0.659226615272811	0.603697281784238	0.641811949660247	0.745603589521933
CHEMBL2363426	0.545277972735594	0.539397388156715	0.465434658756438	0.603678725250197	0.717018698434108	0.576803765516852	0.659614291179055	0.666662591839445	0.610304241521043	0.485709333787159	0.698297315046717	0.639213340917745	0.68285489077013	0.746244750134945	0.643207781541313
CHEMBL1738575	0.263505863998879	0.706434231126891	0.427027343096222	0.715450361303942	0.822108152554219	0.629040265197841	0.416671500197905	0.857448742440173	0.623846543881165	0.651861220175174	0.779571374108204	0.594007247732743	0.63697788730877	0.802420036631859	0.544167871234582
CHEMBL2363836	0.368392034561683	0.538103812124096	0.574107381734791	0.52430976676291	0.690093925139674	0.608646391115897	0.617681359241426	0.587910146297855	0.623020876323822	0.540106154979804	0.595011098655758	0.577564143839888	0.607575092958689	0.622986960606527	0.62820400089997
CHEMBL2363789	0.610279238087714	0.700088453547509	0.760754733509493	0.739356988969966	0.546320000934917	0.77898207133027	0.761482891156776	0.632451305983482	0.776134478078506	0.639996009286772	0.618800936743406	0.809193657612965	0.667502460053493	0.723169022829209	0.877508268824368
CHEMBL2363553	0.785784033353569	0.62835776133054	0.676158176489744	0.656077501460805	0.740846471272861	0.773873498632587	0.805357878990316	0.756294971678946	0.738592907696168	0.636920367880011	0.709609500350059	0.663525083911937	0.789034695213633	0.778241334749766	0.773157782067556
CHEMBL2363332	0.486106938154353	0.667273502038926	0.60638162726768	0.557616102475297	0.677452473105116	0.686031231866903	0.634004568157033	0.708306770606855	0.644763274738794	0.669173911623778	0.635038005175122	0.652515243593442	0.589723481366923	0.659687684759545	0.6835103080904
CHEMBL1614308	0.480003165847172	0.549266190313565	0.418797431228039	0.631092028662991	0.570578795332154	0.541227286643754	0.456767149069189	0.634333302550755	0.476118499974836	0.558179254473323	0.52167779718484	0.585627001489115	0.475038994660093	0.53449822220431	0.549396951445179
CHEMBL2363809	0.37999208866472	0.498140166397991	0.471800804953394	0.476220379422779	0.569295781690236	0.645840873197333	0.764977756633105	0.5676471182055	0.490402177272011	0.521073661158576	0.505137408370953	0.58207040262621	0.786615563270911	0.569314806876232	0.558099666281404
CHEMBL2363207	0.227265498367477	0.630003400314495	0.71786265313911	0.372556736337713	0.701123658949746	0.827796397731382	0.757809607065861	0.584621601449659	0.651348501402216	0.342973398492722	0.487329214965053	0.776119619490654	0.684589950892924	0.581473378963956	0.680043160046209
CHEMBL2114827	0.0138888888888889	0.0469011544011544	0.0906112674257836	0.0138888888888889	0.0363599607403699	0.217947815326848	0.0151515151515152	0.041284014757852	0.0785108329022803	0.0138888888888889	0.0435597474201343	0.096015960443745	0.0178571428571429	0.0448725055432373	0.0921215983135488
CHEMBL1964046	0.718281940226276	0.742201936419068	0.592392064406084	0.880587621683461	0.747830453298479	0.595639567992197	0.858866257831833	0.753071800286421	0.62016748531201	0.791564991887134	0.690279896533527	0.579257853451579	0.878856566161639	0.721452210253774	0.638221391026016
CHEMBL1614462	0.406267173363554	0.25376436156675	0.246758124384843	0.376166177784096	0.307281981252386	0.44433284096304	0.285282429303928	0.265496528256693	0.306462882712723	0.446216030442625	0.422711547645869	0.403407155913912	0.310313975540398	0.266856296300232	0.284624433848582
CHEMBL2363671	0.463138646225228	0.556514333533683	0.763580777113386	0.608314194047799	0.479979730120836	0.825086528364224	0.643766523782775	0.618264712340799	0.669999330659917	0.416552217544188	0.520328828821939	0.762969475868453	0.66820292468281	0.565057567822913	0.686662132319354
CHEMBL2363290	0.235540212266302	0.599969095900468	0.554812503174105	0.418250857320753	0.744840123788906	0.781805909084522	0.490379799938623	0.716292100096813	0.581155155306987	0.418948880680122	0.615229727484762	0.607370578814544	0.618220990157265	0.73105269728296	0.622608383473181
CHEMBL2363459	0.60365528716375	0.748949660080923	0.79145940009102	0.8328304914857	0.741753212297923	0.779321372225561	0.832609914749507	0.665074309388676	0.636672974489461	0.668816771098528	0.670489360141119	0.735725216312801	0.819511483632338	0.724456929058969	0.692023148362916
CHEMBL2363611	0.495049190575506	0.548184642493163	0.656793497556365	0.628704710775144	0.644570786577723	0.775250270562771	0.664481592393996	0.586628039202536	0.558189705640364	0.453380908473788	0.591584468492363	0.48616542022792	0.61851507969155	0.616269331647425	0.659777528435617
CHEMBL2363743	0.569946507337379	0.668969106008901	0.707548325500526	0.654486570274338	0.684815877890419	0.769235298391962	0.721100711953861	0.679825811505225	0.665649435359644	0.727153734960756	0.617673979191001	0.641688746490125	0.732870312709423	0.698382160267256	0.746860254694216
CHEMBL1613821	0.803082212606665	0.889736876788026	0.897351921520537	0.86753315048358	0.947079291356788	0.957742250989673	0.891600489220651	0.967233100753979	0.865567653823644	0.87586055661839	0.958699627706482	0.937399311439004	0.898636068318328	0.910641351910548	0.825185897987069
CHEMBL2363341	0.306312540984959	0.571359006263096	0.619437028395214	0.379505173417254	0.658907817615248	0.707647522065971	0.62950700080602	0.666979861140151	0.470291410517215	0.257018172634871	0.617906236124711	0.616549067122109	0.623650164891995	0.563299166955829	0.578562992373734
CHEMBL1614465	0.879997627580196	0.773826495937962	0.693609577093265	0.902225863756842	0.851805513168138	0.945419210651256	0.889991323195019	0.724686120405765	0.759978876570811	0.905406164944501	0.709810256194342	0.902141315186599	0.898669172908542	0.884671635587302	0.779303605219182
CHEMBL1614083	0.0151515151515152	0.0699146514935989	0.418958333333333	0.0714285714285714	0.6625	0.216823476702509	0.0333333333333333	0.534632034632035	0.226251119570085	0.0119047619047619	0.633333333333333	0.614335317460317	0.0277777777777778	0.152116402116402	0.149373973727422
CHEMBL2363366	0.735536107673562	0.63958037847533	0.771504605021827	0.932253021926858	0.757465226790799	0.639148948907297	0.909247819430728	0.743508439954655	0.724744967819988	0.829031163831977	0.71292421448171	0.758405940501119	0.917953107191687	0.694975964511662	0.795865189626103
CHEMBL2363766	0.777657559661717	0.715990447992086	0.694540144458365	0.957026075956833	0.712569716247979	0.742241066226324	0.897671283651	0.781487662878894	0.800011359765351	0.813559198139164	0.747688380507424	0.630815833692438	0.880370497278829	0.757843712708681	0.833731810039554
CHEMBL2363464	0.28897797683212	0.473419471250058	0.318359476673952	0.369535096387213	0.548654484631295	0.580725733874065	0.759889244676365	0.524616815956318	0.53850911026187	0.293628844184652	0.488056024351992	0.544102283740419	0.774298966898587	0.540174280617075	0.533417110091751
CHEMBL1963899	0.828738031327667	0.816509321568826	0.87738610955394	0.86107047075796	0.897395372324706	0.864878574678668	0.890927816624695	0.909167706134072	0.752089055333843	0.870039144351614	0.898926653149489	0.838571316317618	0.933415737172583	0.932416683447015	0.814194995541952
CHEMBL3214801	0.756396944011792	0.794098875840542	0.836631354747431	0.754519288374155	0.793759125272635	0.782695334361744	0.793246660305243	0.88463575779217	0.790584593714216	0.772303171715089	0.712446101402149	0.863386756596112	0.814349610527619	0.883660412257711	0.830674926435856
CHEMBL1614512	0.4219318350496	0.726178646909495	0.462400614111453	0.550305106727597	0.830952833554884	0.345560278307216	0.509128415225419	0.656675470784447	0.540329537646306	0.567496859421484	0.781559331026447	0.473425987711978	0.571427980753255	0.746080171728473	0.645951244282514
CHEMBL648337	0.971484683617037	0.951276132586257	0.984403571289595	0.991911764705882	0.946857009156149	0.987812471473373	0.95323103367221	0.94612977506749	0.980721325517036	0.963513071895425	0.86230760213603	0.944311545683521	0.957492327933504	0.933690901422633	0.981063649749163
CHEMBL2363213	0.318145615106141	0.504390404464515	0.853798679390785	0.344775508625623	0.647107231355754	0.815697633120234	0.578126024059696	0.572979899721396	0.66402223034963	0.301945610061818	0.486345511087351	0.612271044173218	0.448109091462672	0.613860385664568	0.686535917642729
CHEMBL2363556	0.564323146732812	0.575604944024684	0.766937934636287	0.567102048095582	0.689828910599403	0.772410518441068	0.795336467315044	0.733245382216737	0.687075261443931	0.553156947876322	0.629796425679577	0.670588940398515	0.79232141818637	0.686925250535547	0.788509940136306
CHEMBL2363142	0.673499124182405	0.528349697496855	0.482547059271822	0.560839778873297	0.608093889075879	0.592339211069861	0.785474636859112	0.53692955200989	0.58607188652564	0.458532254216564	0.416216855870738	0.39256663712661	0.734208414591133	0.516871668267866	0.510927986518325
CHEMBL2363788	0.572566516433617	0.698480366207748	0.795595343096603	0.829596637242959	0.59088858148748	0.790023360556901	0.749234696412432	0.648164535252924	0.732318385404906	0.607588718550049	0.582130047353699	0.680255047284699	0.729955028309624	0.662662394406752	0.828471432451181
CHEMBL2363560	0.594846842214901	0.599322902039952	0.611256394223193	0.684100745113139	0.696438057581747	0.705148495223137	0.814498100150639	0.721801238546011	0.550159167884598	0.627752446824446	0.582564322866576	0.545812742528447	0.736349464147348	0.670510362166797	0.609299303301356
CHEMBL2155446	1	1	1	1	1	1	1	1	1	1	1	1	1	1	1
CHEMBL2363790	0.482538085965891	0.769337255650296	0.767280498011842	0.678535945415636	0.877777726595075	0.872315564875113	0.659253700485454	0.787119804342599	0.83690417094984	0.531498335085184	0.752289421875533	0.777599851873274	0.555421188903162	0.809104416425225	0.887875615975073
CHEMBL2363481	0.504031442333251	0.661052913596443	0.726632571132571	0.602252877331002	0.724609079766693	0.791082094234268	0.732533185473152	0.624797260314838	0.689443118060071	0.501746108880155	0.768809567365579	0.626644042504337	0.736050392600621	0.714330186097428	0.7550037000037
CHEMBL2114715	0.681175361994328	0.365217806761408	0.504799165738072	0.598906433802212	0.517801045619302	0.622332052921282	0.651981753546662	0.614847748959581	0.595693208700198	0.593287863690163	0.450716076210108	0.724197053904123	0.697549975727688	0.80192837157696	0.621166956867849
CHEMBL2363433	0.605069964020901	0.649422268315326	0.726080732539889	0.795231142418113	0.676324920764859	0.786618835402992	0.671444650380651	0.674034226393308	0.725982516434125	0.656437772297147	0.614960691537777	0.77588700616524	0.632286744803874	0.719275751384809	0.77392131052617
CHEMBL2363609	0.463248318383949	0.614236790672975	0.631150224780276	0.523224628767859	0.75754932607243	0.765365008625309	0.818340146527533	0.750339999403455	0.580015713703794	0.71042661512716	0.690082043298058	0.669819461939027	0.7795822119458	0.73930614632154	0.570600017233481
CHEMBL3214965	0.570128005126261	0.52221751993257	0.697005244712288	0.654277600994383	0.70346040318757	0.825515944760527	0.577701410895225	0.440434930840132	0.572389269901941	0.621599120818342	0.622128873352251	0.780990009918285	0.638856736334305	0.539309512082345	0.788858279506472
CHEMBL1169087	0.355260744237352	0.13953081232493	0.763843210882685	0.792586148419482	0.281481481481481	1	0.41323214228916	0.115204678362573	1	0.953968253968254	0.513888888888889	0.643052505092946	0.32166528050171	0.11778250485147	0.803112628112628
CHEMBL3214907	0.497213774416061	0.536825979438488	0.541293407312524	0.703653070713335	0.616916994312553	0.589894428039582	0.547084272178772	0.643039791673978	0.569140148606555	0.79098064604027	0.471967691200107	0.624374177122739	0.549259806374281	0.525838443648933	0.561095026827835
CHEMBL687330	0.886946621304154	0.990454545454545	1	0.8596346150462	0.995454545454546	1	0.68681319003336	0.995454545454545	1	0.714326448164321	0.995454545454546	1	0.780876748793521	0.995454545454545	1
CHEMBL1614008	0.761781011070293	0.695466895904762	0.671099355272402	0.705550611926938	0.784637720171329	0.806906958071308	0.829096998131928	0.70160978860011	0.743193019595583	0.763931835820426	0.762985270818169	0.67339228132883	0.728686781763002	0.713224614459407	0.769365421160637
CHEMBL2363324	0.316721882486171	0.509816358421835	0.346551750273762	0.365595152066031	0.454347371264415	0.515077539531706	0.493427481005847	0.515957946742327	0.504135087489636	0.286465542571019	0.447615795085164	0.465205019689035	0.539626929609412	0.536459619693066	0.543879339371835
CHEMBL2363185	0.724855798328277	0.670362877753838	0.570978453987269	0.726491781470964	0.747216021515106	0.578247836553343	0.688288252105121	0.729168590584074	0.551341950590261	0.699595259446368	0.703254426481865	0.682562175096775	0.701834487064113	0.722721247936984	0.563708066103709
CHEMBL2363220	0.406388253582861	0.594412022514134	0.586375928923506	0.567935833817568	0.693134157388478	0.671576619260541	0.707151009121597	0.78723766701409	0.690557378775595	0.521666430994209	0.583948153003618	0.645986315157869	0.711800334500049	0.665369565310704	0.724636197093173
CHEMBL2363555	0.345223977148162	0.582695602127628	0.624357687247223	0.370264818087031	0.664091335193107	0.765993115209416	0.55936944783915	0.626542239236622	0.717611702877562	0.274204307970271	0.69735691621155	0.555502663557476	0.502550559369944	0.641542531543272	0.666885088114545
CHEMBL2363437	0.630451628998953	0.621778745126453	0.48283564931923	0.733992470214497	0.67639366348992	0.608244223035798	0.736367799146985	0.832439789925259	0.671682439323417	0.618879179928878	0.73772426101988	0.721974402409185	0.703819811391556	0.748957700718142	0.656358112132106
CHEMBL2363243	0.51876142231208	0.665314404586613	0.797251905143439	0.752475466519901	0.756313140716553	0.830253357902772	0.787708405251564	0.765245460332282	0.81758910728816	0.553298755496679	0.74476056848695	0.868615468078384	0.787619095098652	0.765781943650279	0.881455314197529
CHEMBL2363612	0.702352685469933	0.751614269452837	0.705124715751492	0.821027641156175	0.839529875343036	0.867333577088176	0.849081519083801	0.943722806512709	0.840091622874586	0.782097538815446	0.797564779766098	0.724727924298882	0.819773987169576	0.886555053378044	0.861459497577988
CHEMBL2363140	0.493531255930449	0.643908072792195	0.81271597766163	0.559041547742825	0.57700863486221	0.806076437906433	0.606836318726002	0.601638870384505	0.800682668939248	0.476411125449161	0.597866944964875	0.579752875957026	0.546138942570483	0.572516742706826	0.818566402172246
CHEMBL3215216	0.869571721007874	0.940245877859666	0.861670528783893	0.879896161218375	0.984345880139572	0.825245955932991	0.960339389789786	0.98792041432159	0.896951281377043	0.856244804637925	0.990859079046691	0.788849950271535	0.948896934580119	0.966785338356896	0.879782261351252
CHEMBL2363239	0.445719679823595	0.621187970608303	0.80028851605028	0.758956656076472	0.600207680844936	0.903499734885026	0.759857811504229	0.674961717554518	0.673365205696063	0.628236870080127	0.498952843757655	0.861005678615573	0.727770203691014	0.685101455113323	0.759169062198365
CHEMBL2363434	0.693117816091954	0.535732494530639	0.621155648779888	0.618754637519343	0.61800689740914	0.790985103743102	0.709199760549381	0.58681125985258	0.575102941243292	0.45588030471394	0.527645778480735	0.697792331125664	0.693355222734255	0.5673065268163	0.666151460625145
CHEMBL2114717	0.103888653864935	0.309745263720216	0.329564668315342	0.170777511341237	0.374547172102433	0.569320219971941	0.145811646921248	0.377951321428323	0.393732329924534	0.134887322222515	0.447966418676879	0.548599811763464	0.139395771938324	0.386513759723276	0.389845793395238
CHEMBL2363688	0.340558066661008	0.504324426576749	0.445727226772434	0.506773088023088	0.419768518518519	0.567608739327108	0.597727378865006	0.563049873493952	0.48671444844569	0.21912365668126	0.531199247375718	0.571908030241363	0.648706772485159	0.640951266870385	0.533341677125202
CHEMBL2363152	0.589251532824724	0.735406889656191	0.855903225572071	0.604350956796734	0.762343243588159	0.816388887844452	0.748108026082641	0.74435710920676	0.914024550704632	0.648327350930896	0.780364983774595	0.814090911070653	0.794110608478916	0.730674746395421	0.900736678384648
CHEMBL1738040	0.433806544430091	0.178575200350364	0.268784321678473	0.377129830315518	0.192688922319923	0.204481764637034	0.377520208302294	0.167997664112135	0.187357652114674	0.313293917685491	0.196672301850104	0.164495659618914	0.38271099920247	0.196595899766983	0.193329248695324
CHEMBL2363141	0.242848816737547	0.401597222222222	0.574379582699661	0.349619975302899	0.815035273368607	0.734683971732314	0.609766604010025	0.822395197395197	0.521121273200474	0.20485792862669	0.432588136264607	0.578531217120143	0.67109375	0.731313131313131	0.618019789848114
CHEMBL2363803	0.589043345831384	0.702944543689326	0.846499285749168	0.811246809361136	0.681802248658674	0.88224560561433	0.801203872631924	0.681376293190252	0.704862131606992	0.732362537577777	0.554003228351784	0.844604239643488	0.809602951965021	0.614432290947047	0.787305889561539
CHEMBL2363623	0.422897694478282	0.699555325045217	0.619436137739795	0.541404051528018	0.720537969512428	0.776636243835732	0.654281841795535	0.707820448439668	0.644400869499107	0.529784568241735	0.70385244164942	0.699955377216343	0.639281519002108	0.689588369792563	0.778816193365788
CHEMBL2363211	0.428266610589085	0.706407003883266	0.855330790385138	0.577448932271599	0.75195581977831	0.907680027087922	0.619295255270484	0.761292788520959	0.828587439249204	0.532974181300739	0.749723269909579	0.639247858305353	0.575781657937414	0.658253380186013	0.886343663825282
CHEMBL2363594	0.167758621879999	0.539154300877914	0.571508614841948	0.367240860990861	0.486760321400602	0.744926859632742	0.467493526807252	0.577833534003181	0.633235287292305	0.160842468722904	0.578700873811813	0.700436989910674	0.399600778314546	0.589139542875175	0.77580636955637
CHEMBL2363236	0.350785031305318	0.779280303030303	0.5972776902876	0.613006126362035	0.81041983615513	0.724952814033322	0.69582120522523	0.787325301236372	0.479910854435766	0.508001102693737	0.806907991364513	0.719323742893585	0.708416940696353	0.736446792323215	0.51517683812031
CHEMBL2363549	0.257488288906506	0.399574026491542	0.593055555555556	0.274523023749497	0.506839219973895	0.766898148148148	0.543438592188275	0.478583758772186	0.563532763532763	0.372261777574278	0.448106079596736	0.623066188197767	0.521126590464509	0.464894945086375	0.548716153127918
CHEMBL2363387	0.238672309098677	0.516902517828758	0.568543757116504	0.315926693916761	0.632888996500296	0.569665834780924	0.638191526665093	0.631883482718644	0.372046459057844	0.211450086671585	0.511156640375415	0.457601510699497	0.54463902605672	0.713831350504871	0.467143349767871
CHEMBL2363180	0.380250411338723	0.570139778933511	0.654007646807216	0.397368570971512	0.568389676069407	0.537138523185434	0.611512340688672	0.607279905551964	0.492564650269489	0.268418275639365	0.32356107112471	0.498598990635604	0.665577762583002	0.619602485720907	0.579525613275613
CHEMBL2363577	0.439464714758006	0.679219870581842	0.735790463123742	0.61872609144668	0.777254802622965	0.827525200516963	0.65482080155874	0.7309171925545	0.684778082500329	0.481854828752218	0.780978491510722	0.794940328776958	0.627220554941162	0.765289339093801	0.753351705361325
CHEMBL2363252	0.67658439700969	0.608004535061154	0.617598010376318	0.752785918874154	0.655704449592477	0.602606520144012	0.692479114406729	0.786563095442663	0.712061039807101	0.592248132872746	0.615786194396078	0.703559901890441	0.658085467089707	0.729722536383045	0.727994282557293
CHEMBL2363630	0.664538100451675	0.733561630931084	0.630241671108355	0.905238194366453	0.717742708592732	0.747506392347825	0.789211686009379	0.695359879078527	0.696835873553467	0.712987080615471	0.715349154552665	0.682668039509236	0.771716178695604	0.696625650679443	0.759487483763799
CHEMBL2363216	0.515930670805213	0.603282893343542	0.806342730623888	0.731777382988119	0.687935705934321	0.864036325861072	0.725196310004792	0.727090435073476	0.748428436995408	0.679455776450645	0.680959437660374	0.778640828348861	0.721349193739655	0.690579933403638	0.819219374107145
CHEMBL2363535	0.497475907505043	0.69615210090548	0.654352289563122	0.57433487334153	0.727915284687512	0.792296046917577	0.770217452286077	0.720131356014007	0.68767818774316	0.617965830755799	0.754334281446531	0.673609719879631	0.786623924374708	0.73996969206617	0.737467264546722
CHEMBL2363368	0.649875413102529	0.728338616821346	0.871388160579842	0.89562071777256	0.66869707135662	0.922916457024485	0.847253096546016	0.724476904420994	0.803412438095101	0.781758353765042	0.634079081692332	0.856080370406828	0.814760577132301	0.707081961094194	0.852882241570434
CHEMBL2363618	0.519880742108747	0.652332615618039	0.65248541381351	0.555243327273658	0.810949678448795	0.753369710274961	0.706122519640613	0.838462961194504	0.682359453865665	0.642703757891239	0.769921450939366	0.749520658336856	0.726489140419896	0.770933050462653	0.740320412068376
CHEMBL2363774	0.239460778684917	0.693180586358691	0.514007866186229	0.306011617739559	0.632493626562254	0.744944295900178	0.230408653224513	0.55553924078592	0.556561202485115	0.2968459513435	0.66940110286299	0.515497546637897	0.207566110852749	0.702731394398061	0.647927174018505
CHEMBL1614503	0.750963086330954	0.817660186570404	0.705698726051291	0.843408103666262	0.804453898651378	0.707254415593107	0.712569716624617	0.747949254679837	0.789932061116991	0.816012506653664	0.793340788275536	0.742163101793391	0.776130595284155	0.777695194562068	0.804222244590103
CHEMBL2363389	0.465999636471432	0.681970277462637	0.744165712626815	0.676630653966582	0.631430324244856	0.828367470745804	0.74751992631287	0.638328232395429	0.658436210293335	0.595663395370315	0.551160988249932	0.70617366103755	0.738914994892122	0.723793449943986	0.687021807730648
CHEMBL2363477	0.497146872328583	0.490384855859851	0.542767287822136	0.522180611141524	0.407553507399798	0.696114149409467	0.736724591163713	0.50139841176304	0.509581439839649	0.443489157986918	0.510305245038557	0.590033343010044	0.707962346547495	0.492222574231588	0.5961063856453
CHEMBL2363834	0.464256996439123	0.594355825697084	0.477652764457948	0.578211032432193	0.675948182146384	0.645358092129708	0.603242758581107	0.612760893532481	0.468508691566234	0.54301375922007	0.702807430794099	0.595178467921151	0.615109262673601	0.64995593483492	0.60495227373608
CHEMBL1794367	0.975723428065217	0.782027130152618	0.915914005189905	0.878765150520925	0.848324624044523	0.922113596848491	0.916202268582763	0.81931102125164	0.939482804538209	0.948544169067164	0.884238751781474	0.939099213322602	0.886218472602612	0.885019290326568	0.936702116528216
CHEMBL2363440	0.579520770576598	0.539214202419944	0.668842503545259	0.845040085425371	0.721706963360568	0.723300501337285	0.721402827788263	0.612785069397508	0.552653290852505	0.726191626672103	0.727620065866034	0.706157066269848	0.690604667528034	0.60212138066768	0.597184041285103
CHEMBL2363363	0.585266384167191	0.62255475618864	0.655903276669847	0.607793390975562	0.561449427529086	0.74475882882054	0.651879173150669	0.649641805470235	0.692499274449224	0.606026296913865	0.626742345354275	0.719937447784232	0.689564060717008	0.635959413055214	0.67709901214337
CHEMBL2363369	0.581930948793217	0.637945788526818	0.795503858866828	0.702822009979985	0.718989966381364	0.861376360021782	0.567183013102398	0.720561746509417	0.788519691254723	0.513664057960727	0.666319823285765	0.781568445022012	0.604960032519986	0.688600830546311	0.826721805601789
CHEMBL2363435	0.487665090547655	0.705146995568019	0.632108091545478	0.573202324876966	0.722655444623389	0.745326135561405	0.73656914769818	0.765019012425717	0.785353297659799	0.470862680428597	0.690390133862783	0.584828768464352	0.703328115074814	0.735880830221431	0.81371155003121
CHEMBL2363223	0.601702415487077	0.468528074215031	0.524927791064155	0.505638109740277	0.68003384078655	0.699654381111111	0.593331009268509	0.6185202426234	0.741024308183399	0.739505542925165	0.74264627964628	0.531462311159627	0.598677068227984	0.590234110719059	0.675966760512215
CHEMBL2363851	0.317225659330923	0.689749232943959	0.644976422146339	0.533669074590127	0.712012283947276	0.818508593015172	0.658347825014492	0.743011002424218	0.682900117669854	0.543821673777814	0.684371658284212	0.723899495005339	0.716893014393014	0.739954316446778	0.709020510103471
CHEMBL2363575	0.698988531465391	0.68269401078647	0.788058423705709	0.821435617617181	0.737870623929104	0.878080183353437	0.779302833183657	0.664433327087496	0.70104023109937	0.734840027752291	0.780323548222234	0.833036521257372	0.764605880110238	0.740631516550722	0.784764941531013
CHEMBL2363443	0.382322324846136	0.533309105357227	0.623159340659341	0.430677944850146	0.393229950912075	0.443021107964717	0.66757079482293	0.489678708387445	0.342033873112489	0.331010347073014	0.381735860067153	0.30916271141835	0.549577924118365	0.465379697668191	0.380305171019457
CHEMBL2363273	0.225611788356886	0.43439967466704	0.6514062001046	0.252772680218332	0.488362123508261	0.794389258825972	0.580108556832695	0.452854828252556	0.570170819304055	0.193375151349289	0.481714585086269	0.604248471986426	0.482224958949097	0.506194769283005	0.668267647265147
CHEMBL2363655	0.488167867145392	0.711457794305556	0.522815417440596	0.380348400298901	0.621204095535209	0.741018458504218	0.607741737259746	0.693126844036134	0.642786564906803	0.443575809116623	0.56388487650019	0.620925813509546	0.559649936305284	0.662307726611231	0.641895309345902
CHEMBL2363242	0.640285884450475	0.727949556866597	0.782846718384497	0.741773271444037	0.82758785221741	0.926264824974432	0.732189786784842	0.736410218755997	0.815140945655652	0.665781284809863	0.728096569118792	0.772926624029565	0.784504214997034	0.802523762000738	0.825359558312345
CHEMBL2363367	0.250633868404127	0.439746557478756	0.401573534975476	0.40689961727604	0.475147200286406	0.699256095566837	0.62418322173642	0.505918153224165	0.485298911704454	0.241867604902036	0.270564277549288	0.608007567526118	0.603280203356131	0.406386975638573	0.556094197921923
CHEMBL2363561	0.769403333497194	0.865351238062928	0.837783569872966	0.907292343888861	0.838239887829659	0.857018703662515	0.889380366906847	0.825986020817471	0.877709249973266	0.837327575728587	0.775279764901211	0.880610631572403	0.834582203820838	0.843197406691522	0.926823884693551
CHEMBL2363771	0.494915100104164	0.693428779859286	0.533797278880165	0.715375257341735	0.587924840213667	0.700008701385275	0.686773768269793	0.648738497940749	0.544819688457796	0.528624134796876	0.527287061724636	0.58557481321817	0.689130977377292	0.661140017595679	0.582341077252068
CHEMBL2363238	0.513515062596749	0.608265909556226	0.691092090012144	0.737488050228058	0.611921110896055	0.766887561469605	0.726931513684254	0.630615300299105	0.733187292602254	0.551230317291977	0.529784105892968	0.631053127850846	0.72910926217442	0.536526057569592	0.792651346104245
CHEMBL1613904	0.583125234631671	0.551055456006146	0.51986290302636	0.727479333962079	0.720063335996538	0.63508492936459	0.593085500216665	0.644351604193221	0.581743018959988	0.642643676977122	0.758234705517726	0.518764989163497	0.66252145935251	0.575068954517063	0.569146267004235
CHEMBL2363507	0.351340584889374	0.517376312353491	0.52263163032149	0.344174913780177	0.540370338034724	0.704070278405648	0.677237392237392	0.620198523215466	0.526646327029052	0.283391434931126	0.44397763001022	0.632856509068613	0.607306469687533	0.598809796043333	0.558927828842425
CHEMBL2363727	0.572371387463299	0.525240755189536	0.817743865247823	0.810710989384235	0.658854158947985	0.850162382978215	0.705079618507289	0.668075694028219	0.739343365910121	0.632244533442611	0.620852782599522	0.803654833992418	0.730550055821795	0.601224202947115	0.799360267273052
CHEMBL2363480	0.550937004485015	0.569408825239447	0.769274398548878	0.718612494699679	0.568494361471198	0.858022979383137	0.716951125010673	0.588908417514378	0.653388840419743	0.654568128639822	0.52676457977601	0.804212339594454	0.633211391642436	0.53497717798598	0.678479669877867
CHEMBL2363187	0.501404096223062	0.556165477304522	0.572189193515819	0.662614181161975	0.609009020354529	0.745212176492894	0.680668976856477	0.602723501270473	0.543767226090001	0.724581792535422	0.679667717706559	0.647323003507214	0.69491611102818	0.552157267520924	0.566983290529144
CHEMBL2363659	0.619875047110569	0.701562054513938	0.597365232976939	0.670819554059741	0.745123578895981	0.801650104821287	0.744645089213748	0.698031111198483	0.764289389843888	0.633771879494733	0.712098053008613	0.675101710902865	0.703010862972786	0.685933251144048	0.808327823009138
CHEMBL2363327	0.411475768991912	0.609737812719664	0.792106113925552	0.664473622375921	0.645040220578146	0.808793323794982	0.704432438760036	0.63377070276467	0.6969709293974	0.426002061493874	0.575183004571549	0.770780580819004	0.706389551255252	0.653352758183543	0.814391025108736
CHEMBL2363154	0.266429996974352	0.0466386554621849	0.115254825583773	0.167112369647199	0.13125	0.49534942182001	0.213020403113843	0.026335656213705	0.353245652814618	0.169183455396023	0.0269308943089431	0.548721635118694	0.152508234982581	0.0453580657069029	0.372487148268398
CHEMBL2363469	0.516030226872979	0.68171482262147	0.694533174584596	0.689116858409428	0.761962903147622	0.796996285434816	0.745033998810245	0.696916883630429	0.693697332600776	0.584519936112153	0.668011821041517	0.799430694932613	0.697389457995345	0.719851748268286	0.74341521539285
CHEMBL2363275	0.4601393852105	0.553442188862246	0.538608863835597	0.517687749116107	0.613366114919545	0.583077789083633	0.639028847904222	0.699189527339757	0.577496728161124	0.498170761207101	0.612150977113323	0.639988712600157	0.61220718054931	0.665976762451629	0.563260906653925
CHEMBL2363248	0.601669761488228	0.540010622155926	0.715409060203181	0.697407534029564	0.53701313779571	0.805351564868372	0.755029700395212	0.662987877651437	0.724718226608839	0.614899510370678	0.525279537871715	0.658592939336935	0.737846420077038	0.673808052532749	0.736301044345184
CHEMBL2363374	0.448873069805797	0.572956454151307	0.67269254000398	0.802589276394423	0.612663924376434	0.821387888402939	0.65387578537363	0.628369014083905	0.612800470129725	0.582584693108229	0.525854299417651	0.746368155747459	0.625620789773234	0.642144677526808	0.741840026489348
CHEMBL2363397	0.753735169472151	0.670257210714727	0.881772657845361	0.934037043161383	0.653983682740302	0.914091275583149	0.814878454344813	0.702183254383734	0.763161062485594	0.811387291231435	0.625117722105119	0.780133974704668	0.779328963720079	0.660541596393823	0.814042985414301
CHEMBL2363811	0.355038715005561	0.637841930470963	0.590979575270763	0.423596708855274	0.812873813014942	0.894059644059644	0.570192802499788	0.767875111000111	0.673560057551286	0.378775586775894	0.738679031257979	0.79488738701228	0.560952854889676	0.743638919559972	0.744963832463833
CHEMBL2363208	0.693859526598087	0.542821866217558	0.730972736962458	0.864887142782841	0.540531259548659	0.686275857828725	0.868659006028281	0.665735841475908	0.754930871498966	0.809850043505899	0.576046311985646	0.738400134027434	0.881702877607686	0.567171213871752	0.798269133261674
CHEMBL2363212	0.532375449986972	0.688972579966105	0.744944339925957	0.627111876279496	0.662294343070749	0.773543224030009	0.747064935372118	0.76814021956777	0.68968110430732	0.637732889762383	0.663425600770481	0.697794660327183	0.714152573734578	0.74576528285168	0.710294749490416
CHEMBL2363373	0.334099361703205	0.568702240526108	0.568661249596263	0.430322067106171	0.547839948477687	0.732931729209552	0.638805991441411	0.570930560314049	0.548838510091546	0.371347251108711	0.537211925040382	0.459074056382546	0.640890574326344	0.502038497774978	0.646574507066588
CHEMBL2363657	0.627262805432762	0.730967916877038	0.777381061629007	0.651700235210855	0.714846182083981	0.793897879853477	0.6574674692064	0.72946479794146	0.737939167651455	0.705494823135562	0.658524590170514	0.812814140939154	0.745959792167433	0.695514478898044	0.818429620388506
CHEMBL2363160	0.335760054854737	0.357193756424542	0.536155939151375	0.437128256856959	0.439639191961022	0.687719037255651	0.675428721341909	0.470681263530463	0.513595326643937	0.374592364712476	0.341465513608398	0.560334071386703	0.698991928027372	0.40689433197912	0.580681361867743
CHEMBL2363846	0.227744864477945	0.472482467307436	0.561769241904873	0.292351970662141	0.52554345052744	0.734082057658091	0.514588262137282	0.513546974123221	0.610708164157919	0.24332604748031	0.459208709137369	0.617663014373541	0.321041286254602	0.499806890160852	0.74657201107859
CHEMBL3215276	0.947363924524924	0.963632060628187	0.934853743121331	0.97660060457805	0.9824215034481	0.994793359718965	0.989189787584278	0.991278720262983	0.992905409047254	0.981777207443929	0.970457153657072	0.992970153115582	0.986277816132113	0.989328063707063	0.993606203826996
CHEMBL2363740	0.422140199953499	0.810726596746334	0.576419146901957	0.53305811465833	0.83622673135831	0.769056416418337	0.685364145658263	0.836303871781813	0.641516476442947	0.492248238705323	0.857664176781824	0.564640625291216	0.642341430499325	0.82245616530156	0.659903750204201
CHEMBL2363218	0.524314793610373	0.671948232922478	0.812016230274078	0.717021399633511	0.663599038622456	0.870458756074362	0.792388300750322	0.735219294615494	0.756360183269648	0.579284275240672	0.596286032554267	0.770028589111472	0.750741366472612	0.764123355816225	0.823712214372474
CHEMBL2363224	0.704313249736653	0.70083740800073	0.815073875092571	0.857409741915238	0.617955070226558	0.847309678532084	0.788495642671485	0.715227298239622	0.730534461017837	0.762057789848931	0.564624537377028	0.833409507436996	0.764201021297235	0.637530394266109	0.804315334638864
CHEMBL2363529	0.248522312265592	0.494088070555398	0.358430586654725	0.421492308385008	0.514002002730882	0.509830529925811	0.612891342928753	0.64487795741517	0.512870772201655	0.33474488546083	0.578357109561262	0.465945063628105	0.719124526043032	0.58256248516879	0.590218804000773
CHEMBL2363713	0.847171470456185	0.788884622503233	0.799661680416745	0.946213077550981	0.82553436015022	0.821110844714207	0.914275030948372	0.837009052613079	0.832069253444641	0.858285792871609	0.797986537173281	0.849058605060044	0.894211935882513	0.829621310610239	0.87967505888137
CHEMBL2363820	0.615221210541607	0.573745979519251	0.740963359027776	0.716619986536698	0.557019254625463	0.831222631733832	0.768173504437299	0.615355481845874	0.663940770821336	0.62686311421357	0.570182877553686	0.717994166592012	0.738160222303465	0.63843544602373	0.73817415582887
CHEMBL2363314	0.341849674122965	0.331556763117219	0.360809970544479	0.616362244030855	0.586642109600716	0.454338523117586	0.670589015591147	0.551560153925834	0.516626231695402	0.418583314091733	0.738027849432515	0.623086637516574	0.622505393058995	0.558843107500747	0.584055213831107
CHEMBL2363635	0.215711533949699	0.332697064839922	0.58230531269747	0.240711754601506	0.519520721406902	0.756386853886854	0.525659494567058	0.460665997168098	0.534687885935179	0.184408188043997	0.484451051019374	0.702715441221188	0.550350594783368	0.561327736222694	0.565741698388757
CHEMBL2363352	0.392769125268342	0.538854496060505	0.738157056150477	0.674595255977437	0.55375158183481	0.76329248809899	0.59799830285832	0.577625639312322	0.62286861562967	0.523066778778695	0.527598435449586	0.725096948616686	0.599328592655129	0.606514280528052	0.764588390379631
CHEMBL2363631	0.469464798814536	0.616693359607761	0.775954012686469	0.797674506126392	0.762249781050532	0.896451310986915	0.786328411759897	0.699049691572954	0.784092527879882	0.624747727400524	0.681914801684755	0.901645968448028	0.704262242083536	0.762766620108419	0.861766371712024
CHEMBL2363221	0.382575440931765	0.672216253925813	0.42643432867218	0.326791017542895	0.691463028844389	0.524438195290598	0.627748538011696	0.661093634849507	0.688387445887446	0.398850771369154	0.651131058662986	0.53076845362651	0.405182220172381	0.599224495942314	0.632632151474257
CHEMBL2363178	0.569622194844967	0.617383000771159	0.759057572881944	0.66030186316951	0.774734824408073	0.800462209992582	0.727783628408628	0.657109420185078	0.698625731330335	0.572486617536527	0.625963101638505	0.671061482843626	0.736054894179894	0.729711978664984	0.739013566905336
CHEMBL2363546	0.507435965865453	0.741048644449651	0.771316799795456	0.784952767672751	0.718943717107632	0.842964691949654	0.775516985208266	0.722029887929469	0.700817000054304	0.534008296545384	0.545925334614676	0.805860215072784	0.738449936580368	0.668030243597586	0.808838417590076
CHEMBL2363343	0.324026444528297	0.640438844051988	0.574239130493163	0.631620743758799	0.70750866711596	0.732894278680892	0.743725022749087	0.714717001408178	0.546263537045506	0.404868637788032	0.727237423702941	0.662254026115256	0.738743421103399	0.658631901724007	0.587631667198483
CHEMBL2363210	0.481660601695109	0.658524833004002	0.748707116638151	0.613229189564052	0.682971321753559	0.843019019332407	0.688213574614704	0.676034450209754	0.691348119884417	0.616560355377798	0.656522169087961	0.677146824760568	0.679711474929516	0.632864289877939	0.79971021136122
CHEMBL2363452	0.390809717727796	0.617249681211873	0.554244983513402	0.535054579494538	0.610124760439015	0.770727147607971	0.58856229646762	0.640854468868627	0.584015568253166	0.477406820752991	0.597453444248654	0.633858555443219	0.575511857975626	0.635417252021374	0.68156409769661
CHEMBL2363171	0.347201161585804	0.499536701044054	0.344034401606563	0.496919624940619	0.707136470985155	0.601021536560752	0.70044913643704	0.636834278342431	0.446407294784488	0.239693881806186	0.307662095071382	0.411153092485343	0.745879199823165	0.654051161298615	0.556236018409932
CHEMBL2363445	0.597981835790805	0.67280105546083	0.658006636618677	0.856158730928038	0.791039360467474	0.85652881521942	0.818740662807163	0.670561241448331	0.71366424591759	0.647984114974648	0.677022683930682	0.802429736817388	0.801526519939298	0.766815169381367	0.76700497396943
CHEMBL2363319	0.412657310484873	0.49431908927762	0.266151626797897	0.308306205663395	0.585938490173372	0.571538147208242	0.557619411865932	0.562044173975765	0.438028990325452	0.353183482540865	0.405701109979594	0.438505457575666	0.539106134127686	0.555333516019338	0.589848454444688
CHEMBL2363559	0.576234975682484	0.674686590036581	0.723059520558692	0.83579498596248	0.745680943069287	0.753521889956386	0.772138559086989	0.745509357490462	0.674349822469922	0.736628327392638	0.741919835657563	0.683091642580332	0.739314972401257	0.743934536141154	0.745567318642421
CHEMBL2363796	0.626578862463769	0.435172537197172	0.523729616932831	0.880501387408409	0.601082346404686	0.709995145460759	0.694229030948621	0.485325675851638	0.566451184598545	0.683189486888599	0.557612267590867	0.652392034316399	0.624118081370424	0.477372313971093	0.586036743705652
CHEMBL2363214	0.511395553573544	0.672671027153483	0.754135723024878	0.812291453480163	0.624869289959363	0.844556540846208	0.679300723929514	0.70988957099914	0.709572082939545	0.587777896138446	0.642137493932085	0.734476173721288	0.662152823112175	0.631463842881063	0.746265941228777
CHEMBL2363377	0.580086162448506	0.68577206504785	0.751210397045934	0.857246432019596	0.820723071634137	0.861025265542341	0.800662585435072	0.740304704779941	0.754051752543375	0.701563860034929	0.718669218449163	0.752739086531498	0.779730891133741	0.816899042205437	0.842783227969976
CHEMBL2363370	0.41532965674523	0.369122390468971	0.464165062390402	0.561530841841685	0.522507542915986	0.687154866561726	0.625932283712456	0.633239145322327	0.544143482717267	0.459239782679945	0.525358458521648	0.596550387386286	0.667035630493159	0.452976832967377	0.593077790785464
CHEMBL2363454	0.578765842960238	0.564542700506617	0.62847085021367	0.768792181126325	0.66935260412144	0.722043502939664	0.752905781137178	0.642973005643715	0.620204002091099	0.691890867401136	0.666865042189678	0.602826464468549	0.745581903001543	0.578384730264526	0.662858655163144
CHEMBL1614231	0.659826710690268	0.504889240893093	0.708671855465058	0.710080060519474	0.750617711750969	0.783048398958903	0.693834846081455	0.420784927507605	0.619977920438317	0.645703326529288	0.630664287359624	0.679178528930388	0.62157017967831	0.494802863142112	0.713300792696025
CHEMBL2363425	0.519216473277533	0.518126924336989	0.668500067073988	0.642503932270484	0.63786118266084	0.81450445874788	0.790351083132249	0.587701502931766	0.736177514292839	0.551847317131752	0.576810337933482	0.629189439513554	0.788781549244305	0.61921755336086	0.760144614372556
CHEMBL2363831	0.447793715043859	0.628853276353276	0.527110113635601	0.639563597736972	0.617674468912298	0.658608531819058	0.69575067089773	0.615594657623643	0.488550888153291	0.587424716503263	0.674375609321701	0.63492966911605	0.704820656854325	0.57190034366505	0.536427479140563
CHEMBL1614216	0.603168836909051	0.639335819352942	0.614751800740295	0.768398953992383	0.783207973914609	0.625837212927684	0.703608736238746	0.712095092459156	0.509040075285115	0.670873091680175	0.7429121286265	0.620629978634108	0.732983713312124	0.621692143407461	0.51229233530127
CHEMBL2363644	0.275328235654838	0.327113316552891	0.302276844982294	0.327895468147663	0.39239055387393	0.663409247598321	0.451155745565683	0.275330186544207	0.527538812677631	0.237486128686805	0.449978649380177	0.544914344914345	0.684447453857392	0.424327230324232	0.527164482355394
CHEMBL2363166	0.500152996912445	0.449599664276985	0.550997784731905	0.67147409743772	0.652284286191548	0.666808040637964	0.71491138838623	0.614074975136968	0.512646982757128	0.475383707027793	0.505447234902014	0.678794707581323	0.73736918856387	0.644511638195849	0.647452448409642
CHEMBL2363446	0.602998121802979	0.576093566784811	0.694177889682301	0.812954702816265	0.651547363953951	0.807844955558826	0.786534521266743	0.70172550240592	0.712833285367222	0.656678523394148	0.596439496081273	0.684868212320427	0.797708122917101	0.646355311007402	0.771971137836522
CHEMBL2363470	0.255205158682834	0.506367854159208	0.580148720831781	0.309452658446076	0.288032379931335	0.689430324577383	0.558733420731166	0.524021073740501	0.447201928302952	0.188999551055339	0.234526872315309	0.565902433312424	0.59339182970868	0.561461470859967	0.522029586154857
CHEMBL1613814	0.791811286133599	0.793703575471081	0.60560508437655	0.850597706587265	0.947248695783571	0.676254639379003	0.847806979898816	0.935752396326435	0.698470750977778	0.785269943366495	0.913964232511647	0.610113362841556	0.844583806287545	0.960980249209197	0.743868310845061
CHEMBL2363645	0.572897849001521	0.515429183047499	0.633014725019874	0.564011398026113	0.577049805992266	0.735608636898304	0.693423388770043	0.547157769253804	0.676230548199563	0.435308355690454	0.50594444220501	0.662253209920782	0.67843940117958	0.571466069914846	0.789674880056885
CHEMBL1738021	0.898080808747579	0.92907723322466	0.891487784657136	0.927635965562531	0.959383432340262	0.973305071400237	0.917149415265432	0.973432153714944	0.980937771887773	0.874306380286713	0.978591740610819	0.985609222568112	0.938345732995012	0.958213368027477	0.989921982765915
CHEMBL2363516	0.46168219614511	0.578468108682667	0.724781586883939	0.624481251846399	0.521705665765263	0.788420253762616	0.663512421062379	0.591829260091155	0.724080686055258	0.474732912166067	0.480794500576681	0.657846798236177	0.616733195854713	0.537286381547745	0.740120307016087
CHEMBL1614147	0.962747622565438	0.931401038457412	0.986146214896215	0.977219785871228	0.996980056980057	0.937125069919188	0.982664146918058	0.980571601849789	1	0.98486737762766	0.993315881220229	0.861084166378284	0.952656481568054	0.952956594012968	0.995694444444444
CHEMBL2363492	0.177822667301834	0.728021978021978	0.724771655974218	0.219865306262365	0.69304435483871	0.825602968460111	0.324652772482898	0.720138888888889	0.520289631003917	0.134160477322242	0.404761904761905	0.648862687020582	0.169731631457638	0.763888888888889	0.787146662860948
CHEMBL2363696	0.525542222651511	0.677653794607519	0.752219402503038	0.844832371567866	0.566651056865623	0.856521825310645	0.766461689188829	0.661672704149821	0.748560390479342	0.524376467194729	0.444546187699124	0.715341648668308	0.728140994411554	0.692918583895751	0.766363528615694
CHEMBL1614486	0.658502674770687	0.508238937474571	0.71891616198972	0.847702668415808	0.746086706878527	0.812363415867938	0.818468162430653	0.578898905670745	0.734372328248252	0.826862789782976	0.751931187084943	0.712092527003416	0.836666695835984	0.615057523397294	0.796417121161665
CHEMBL2363847	0.470790270003113	0.668104412074721	0.625529278213873	0.468964835604861	0.655619525942285	0.842728613978614	0.79135182858009	0.614014530685167	0.729761889798655	0.379926854866826	0.689379027192143	0.624249310974854	0.626609700951806	0.606796431766734	0.809102697984277
CHEMBL2363719	0.793390241925983	0.588063954947483	0.680978875855457	0.836366293752446	0.645861412925506	0.737972595911473	0.741087157664226	0.745678064799589	0.673434466995596	0.65657979529571	0.567418931981031	0.695206072719954	0.741766469870102	0.725450208200964	0.765544632573441
CHEMBL2363634	0.689693017634274	0.74101757115042	0.530122435237171	0.873702112690177	0.793151698050982	0.67762293226731	0.768124186028818	0.787765457534721	0.58450247338947	0.683582563495391	0.7193389013829	0.638371406616059	0.764059712566429	0.775406117989764	0.624480904347213
CHEMBL2363569	0.556335385150101	0.650447052995852	0.628852504630838	0.655693261645347	0.761964584205486	0.71122804328433	0.611180880686047	0.699023400205962	0.655707666777617	0.557277058809725	0.641536523513709	0.640569033500744	0.608528195129663	0.784958566352951	0.665377137018037
CHEMBL2363294	0.707113777689507	0.637796956941351	0.628462046449813	0.921017024774047	0.611876193712674	0.753288494376524	0.757200845129179	0.632403319954463	0.603789441271884	0.728083675452954	0.538509847453752	0.765065354120203	0.736812610501207	0.594596946075619	0.659676034298422
CHEMBL2363616	0.496007586927833	0.617437912338697	0.57460105673806	0.679251460546939	0.539877550369818	0.749479570321565	0.791106728781034	0.657924674806252	0.693075538030204	0.425764534030337	0.538417801810275	0.750237949021673	0.723095642747346	0.673687811323112	0.814672845582841
CHEMBL2363601	0.650420469865793	0.597750743657061	0.683563220047367	0.798056174646317	0.648785893949996	0.819649104092073	0.754736213794105	0.673182483152684	0.775936085579081	0.65313876933404	0.559617051415468	0.833352734363369	0.705303197057247	0.663140098210807	0.758296585508014
CHEMBL2363514	0.423012618626209	0.718019133644134	0.566468884965886	0.321578715797169	0.836090585659551	0.73965744400527	0.418163368175707	0.829453359140859	0.54200898403797	0.344747517443032	0.863609225741579	0.624959073847963	0.517771599124798	0.841659902597403	0.668817115308343
CHEMBL2363748	0.336867371935483	0.501327963964146	0.47521808631332	0.638363466598761	0.637350866002659	0.671018634257371	0.649334315040837	0.534897392428644	0.501307533970646	0.326437864766812	0.304515448367514	0.679424165637302	0.679523862811906	0.49013865582493	0.600304370052084
CHEMBL2363747	0.685341430414525	0.726868224275441	0.746356685255298	0.788152717049879	0.810044058866976	0.901856336932811	0.799824501165503	0.765814947157438	0.784882094699819	0.746199182154416	0.687827397534643	0.799545321819901	0.791370688426895	0.758567747067025	0.846181674630705
CHEMBL2363457	0.491484674038308	0.432659921695481	0.619628666783429	0.641232335013665	0.609300179128353	0.825324204193741	0.774969275488725	0.517438390630554	0.53306524699603	0.550420327294823	0.472177595338218	0.771925722217075	0.782554310200355	0.510426627486837	0.584749883499475
CHEMBL1613949	0.775119288869973	0.811919292707597	0.688076796597289	0.913846738992311	0.951597877935782	0.837753363454317	0.800645061651287	0.864395501566267	0.76444709783359	0.934695043975392	0.820451741180347	0.780987999215214	0.853421336672623	0.938178004022395	0.77684385068928
CHEMBL2363767	0.531272679127212	0.632523146454252	0.724050317738663	0.743236518910143	0.698083462319411	0.821375544144783	0.716636029741277	0.744771829021464	0.769947491939973	0.523003060110797	0.576447081828013	0.765852697573031	0.736229198387121	0.719756310230802	0.842759347708882
CHEMBL2363793	0.557176733372911	0.577942773037817	0.558519345621748	0.767748634280892	0.729351403693509	0.706237719725571	0.765670831398256	0.709084591049201	0.47253947580403	0.673273383271433	0.690369148105598	0.685804286356918	0.744710384146848	0.693989804898896	0.551307498018277
CHEMBL2363692	0.652881857348895	0.491751846577984	0.704266659325557	0.685374005033932	0.518095242726853	0.837266246929127	0.683049323271842	0.527490600531093	0.654107372791992	0.488938302341507	0.448208227102102	0.705952855543865	0.616546971495043	0.559798170132273	0.685741176732562
CHEMBL2363639	0.628743795128644	0.611448234880887	0.668085319586877	0.748420086219851	0.648100330480693	0.759912903322542	0.811897183266169	0.656424042511571	0.685265676803218	0.636392226281419	0.60169533343271	0.727906970455723	0.747862273561603	0.63642625737331	0.720677066994863
CHEMBL2363421	0.405905175533632	0.356078643578644	0.630439141468553	0.239182509873976	0.404023512719165	0.70244417211329	0.247861361450481	0.331556024206859	0.433227481582745	0.139191964520912	0.347110223024209	0.385256160868906	0.218757163489629	0.42182668208984	0.648433048433048
CHEMBL2363313	0.763556005457046	0.682242748830397	0.749753297133184	0.854517890606126	0.71721321433303	0.883175438007371	0.835626708309963	0.663806653372023	0.780143809609477	0.635920081322984	0.671189433776784	0.766312274684508	0.807283070892157	0.691101122756818	0.857903526089616
CHEMBL2363798	0.372402171273016	0.507587186283781	0.597684220308197	0.497903550722141	0.524786690483285	0.711633499770401	0.659622831969843	0.668084027470637	0.516492931437872	0.363490881018876	0.365071194628083	0.728429291689152	0.640635746884813	0.643459973915856	0.561317239108561
CHEMBL2363272	0.532000235710569	0.61887797134635	0.681958774210123	0.54517676680486	0.684126180831278	0.798753014267358	0.819987627542182	0.705128432758244	0.696020340825304	0.427120901296535	0.559295892462282	0.598949483500637	0.741454299311273	0.672510804957551	0.720191529132816
CHEMBL2363447	0.605208377858085	0.566895778583211	0.600162219564443	0.699331593524286	0.793641683027864	0.758463194231024	0.740594665478126	0.595132759159727	0.560908418053763	0.580839777517485	0.642174910942923	0.722894315430495	0.684435911559878	0.693798634071912	0.619866198673302
CHEMBL2363749	0.622107231349327	0.605768110572948	0.761697012182546	0.766764002182038	0.641023751521017	0.783811025727481	0.72808972643085	0.720499301152702	0.671605083145278	0.668143644501757	0.61183047895984	0.752495736690783	0.700018318392999	0.674475959475217	0.699327682924903
CHEMBL1738438	0.982833821580695	0.990873854827343	0.99587263736804	0.980646041101216	0.94411560642716	0.963070940498773	0.978667409674884	0.971635115342018	0.927642738210106	0.964775944524117	0.969771668711129	0.977878569789987	0.963810533919669	0.910200877744989	0.910200877744989
CHEMBL2114847	0.858234345988826	0.883688775543114	0.972522954854478	0.904950071296956	0.930289150272515	0.961479234343991	0.891993850392543	0.860168001441281	0.926525919019621	0.876834778859968	0.88072907422763	0.978036013440043	0.912879159946024	0.912246620244842	0.924844180561323
CHEMBL2363388	0.302454293065146	0.552839373418534	0.665803513540146	0.576955309304357	0.684011358763339	0.648383251676473	0.697866655209456	0.668433470241801	0.548406698797742	0.473796127362077	0.475888707294436	0.585303117249616	0.7041775849376	0.704578390524973	0.634496310672069
CHEMBL1614035	0.781458215697346	0.718849206349206	0.803606699360228	0.87797619047619	0.955331088664422	0.921710663689664	0.820365646258503	0.884362526687088	0.725140538802886	0.833235415378272	0.925666925666926	0.912541849764632	0.868664965986395	0.94045013628347	0.807512553316781
CHEMBL2363830	0.491320178932623	0.56282145536209	0.65649981007262	0.60332355288745	0.665030783468767	0.714723280662276	0.531139528624495	0.611650455479857	0.551609770001343	0.519870623085737	0.59772717313554	0.8344411679938	0.594840738436876	0.624631140457105	0.632430490361521
CHEMBL2363255	0.300673485870114	0.361871927036097	0.332640572925913	0.353214269508525	0.425160857353694	0.490000914118561	0.59408130112006	0.314584975015647	0.426557386564949	0.273781888114764	0.232655346270147	0.521444805437604	0.599245793014175	0.616323067688614	0.411050963931399
CHEMBL2363562	0.608238834289346	0.686978765631262	0.755541296527251	0.851831124786428	0.765143665660598	0.857946859355528	0.703972499141967	0.746570166619397	0.764887403722644	0.638068961729765	0.714298914379173	0.678108979439071	0.705364491535902	0.744876211854262	0.816939960593043
CHEMBL2363335	0.352232733304742	0.514793073912733	0.664312464411938	0.657453350780178	0.579380160765719	0.68698915183469	0.758169755436379	0.678314826964713	0.54272721888821	0.450786632637198	0.490033941615703	0.622001584228752	0.708530647628945	0.629647069069013	0.599645303486416
CHEMBL2363338	0.480388166450139	0.656311905667393	0.618048323432697	0.706592457532047	0.713246930516948	0.807683557416395	0.751131460939224	0.701065177418661	0.709364131844883	0.596153608337399	0.655106032077059	0.775455696188152	0.686717483262061	0.724454601885952	0.738578919522519
CHEMBL1614395	0.953861612508952	0.83122769936562	0.868490793150885	0.953048284957433	0.865980103896393	0.893382495969568	0.931603136119656	0.819893439490576	0.875238790859652	0.943847663577929	0.87079112729033	0.921955018184785	0.892270663428492	0.858699797550513	0.856466287206495
CHEMBL2363334	0.566672644641755	0.739030455368919	0.585917584629256	0.8070218676862	0.784882150196304	0.537904870521069	0.761778409986143	0.739372124054185	0.72496172491763	0.60272250926729	0.726687364285362	0.72371793143158	0.743429940074895	0.759302814362886	0.7699849915203
CHEMBL1614007	0.945199739778607	0.951421025029415	0.946071254525337	0.846185861460274	0.782915537142909	0.921569657595456	0.879036147196484	0.858807511067964	0.93641205533646	0.89427808188922	0.837500211573203	0.961909488544447	0.884667910616439	0.866665335868059	0.925464411919247
CHEMBL1614049	0.689397053116742	0.552218595952531	0.723136129829362	0.800322466739294	0.753502445836378	0.802559272978342	0.767757274582295	0.686427414334209	0.813593668345083	0.770768196753427	0.750871263620014	0.730245772221928	0.746001077680805	0.71102263840322	0.818146245191819
CHEMBL1034535	0.989851658375858	0.960214646464646	0.495767195767196	0.995966596809121	0.924626762126762	0.544191919191919	0.98337981492192	0.968093434343434	0.589133089133089	0.980041579695195	0.863737488002194	0.142791005291005	0.980788397120219	0.881511682761683	0.728021978021978
CHEMBL1613853	0.723060403752795	0.49743105177022	0.593404479456733	0.791481742736131	0.736037650268384	0.611512038271704	0.725747272440847	0.629091031123469	0.610188016135691	0.78773754185478	0.694158994810973	0.637404359699319	0.770235198526228	0.650104717437109	0.685166704220732
CHEMBL1614138	0.443399182927256	0.381074079405166	0.480467540628823	0.528256791807429	0.435660250652694	0.63043852363398	0.583708650275289	0.554755120147929	0.705084106672047	0.5231055465187	0.595785909416848	0.48092770446357	0.608809314811043	0.573755440457595	0.634231753643989
CHEMBL2363814	0.427779519688388	0.604022012893239	0.605499805111874	0.560231722047662	0.761372372686602	0.759575568623556	0.629431574472867	0.63357016830337	0.474705298543382	0.462215534528452	0.747882622223393	0.727845047109753	0.639941372803312	0.707407521177575	0.489722378699781
CHEMBL2363245	0.496477407432153	0.700532822085765	0.636430981216329	0.579784204076902	0.769599373318879	0.778751674903695	0.749148768018442	0.698154269565651	0.716286166460441	0.632028397097131	0.695871087015427	0.646615769446196	0.743535063541101	0.74496925938605	0.706650021724691
CHEMBL2363349	0.76834180987769	0.864391378759487	0.756398184261931	0.889218373659255	0.873203974490657	0.88941483649172	0.811044851885745	0.85365505043498	0.760174100123847	0.727418281658776	0.773635485062023	0.812734901151775	0.787959692867323	0.88932537521833	0.762350784105815
CHEMBL2363794	0.370705371744925	0.566736647282529	0.630705194430906	0.601279599861723	0.758135088951076	0.812323132735284	0.73590122521157	0.643505631018403	0.554471784008236	0.234510597198169	0.783856826252256	0.749405813165231	0.688452126577127	0.672633848832452	0.663477143287213
CHEMBL856174	0.993610171505276	0.984429308582768	0.976006151785951	0.988681461059324	0.976965353272855	0.916839207619006	0.912797374240388	0.962390289888268	0.951661260566059	0.989741063883633	0.970503105547333	0.99499373433584	0.899514465637113	0.994757766302586	0.97199974152954
CHEMBL1964005	0.86225179992931	0.969641291757193	1	0.96107136201019	0.982100730670504	0.999420416910189	0.933850398743875	0.98631148837624	0.993971087550958	0.972792749598606	0.984243045421623	0.99504583515403	0.96472279072859	0.968796759486429	0.99592877385036
CHEMBL1963983	0.433354442515713	0.43014524178081	0.695165025150577	0.504117686795822	0.400634046803402	0.810269959439088	0.457347480894392	0.442331911057562	0.814127559504371	0.569204370384517	0.236358213318998	0.726484221824781	0.449554761884222	0.357552787047006	0.742307903667831
CHEMBL2363215	0.460683515992808	0.586281394072493	0.709160789991551	0.467906801608782	0.748975583240289	0.797379502598577	0.6270204628901	0.619425717758723	0.795726112110934	0.569551386839894	0.670538118910933	0.65454510627266	0.515841638463792	0.666241572918883	0.76095869803604
CHEMBL1613890	0.794057750519937	0.689268343270427	0.676640084023867	0.860544282136445	0.817435047934012	0.704002266461787	0.794464760648961	0.67615102483899	0.676184660060761	0.806083725880279	0.800240408124373	0.60063141822786	0.781021766110016	0.792850077648077	0.719071565846986
CHEMBL1614363	0.448593887996062	0.646841659515808	0.908858942265605	0.522455412234824	0.593670051846736	0.711964050509928	0.58069144102409	0.652288434884418	0.727196834062464	0.472623297866938	0.574657733782448	0.658253658860074	0.563038668315203	0.626436727117906	0.723926514910374
CHEMBL1022010	0.999489210284665	0.987910186517854	0.987346243871294	0.995062479561038	0.992035096203774	0.995354259405708	0.998431841825076	0.990717891902698	0.98362998428547	0.999489210284665	0.962454776081669	0.991616147603564	0.991529071789505	0.992035096203774	0.991616147603564
CHEMBL1613962	0.795891437284718	0.731792088487087	0.830824314574314	0.91600025381161	0.844921969878265	0.83441739439611	0.866102824646661	0.849524321103761	0.828894518579116	0.757945430238211	0.678826150634204	0.822957834649011	0.924414277985204	0.820802538608045	0.825888566198164
CHEMBL1614244	0.66817430588263	0.549568597509984	0.773423204967978	0.846117853078823	0.669823551270943	0.722402080979575	0.844544768131366	0.491388380569691	0.75429925968862	0.799356877695156	0.551070554371689	0.666890758790081	0.800769140329143	0.600548237055642	0.686810926887367
CHEMBL2363764	0.364534373759554	0.448310706243439	0.555413880283479	0.27487747026443	0.708992824342705	0.723072046121918	0.648025123025123	0.527307896975579	0.499933958193973	0.302970071601208	0.506604287860972	0.697705410660573	0.672642682987511	0.637757808881458	0.535017761274555
CHEMBL1614405	0.851587301587301	0.612244296757164	0.899990798675009	0.716785714285714	0.882896387721755	0.829102524549357	0.826785714285714	0.830408653846154	0.648749541057233	0.753787878787879	0.811994949494949	0.749709369095066	0.821111111111111	0.744805194805195	0.768954913864416
CHEMBL1613926	0.916013741397373	0.726728837112773	0.375759157996	0.827052807156484	0.722928450581116	0.515022679060992	0.889918234585812	0.777330395955511	0.702684988622489	0.854075075000356	0.7950011764077	0.707326238576239	0.90913847516856	0.771536795395838	0.698418613550193
CHEMBL1614492	0.755245744685374	0.738164994852578	0.690622128158467	0.807897528891098	0.743536262236998	0.777156450067253	0.769878639823397	0.67100746707399	0.636080419850572	0.70414112566275	0.749617090224322	0.679035117524061	0.823305201564735	0.708094433887807	0.669469430560658
CHEMBL2363716	0.61377979795099	0.685723660805803	0.70292009924704	0.710357911215944	0.677483096964362	0.781389703686869	0.70986812054203	0.733222343801205	0.725139563276233	0.638328625613019	0.641389084625512	0.773853320302005	0.744093034821821	0.673849429532001	0.788333426449519
CHEMBL1243972	0.980468839030452	0.914642420982133	0.988814848856209	0.960597046567276	0.953580182093807	0.988814848856209	0.920225503387122	0.859057804186047	0.923324535962404	0.989263482472852	0.940178388434927	0.980953110410831	0.968720980270183	0.86708191098559	0.978212703350571
CHEMBL1614053	0.669127978188838	0.578723397291947	0.680002152462242	0.785004690991322	0.783344672508903	0.714943044146043	0.721518911396213	0.739027299349704	0.724977645772702	0.718245253292997	0.760804817844612	0.706167540235519	0.758042310321541	0.675008077419413	0.772824603383548
CHEMBL829401	0.986099098736108	0.979767247665777	0.96499412302814	0.964164361259273	0.967204529844853	0.956885451172406	0.937691523604795	0.87997036627143	0.874744976121481	0.992655201824228	0.9792964860162	0.947789427890278	0.952201939136377	0.920210980565308	0.930827915401248
CHEMBL2363167	0.488707976532091	0.674544978830693	0.715066014438924	0.578623777105786	0.712834168755221	0.777642601435661	0.670914122386814	0.647201290772719	0.642277877020033	0.579328281598015	0.651695965659397	0.640935402568796	0.708589342195186	0.5597272825214	0.674372393656405
CHEMBL2363592	0.558439906863215	0.535773778039835	0.607985220270982	0.663818783973827	0.535950787509601	0.783472083858978	0.631569300022263	0.567861358563459	0.664122220506632	0.486351167141025	0.419257493523586	0.745037976591331	0.640794290242303	0.554229934537415	0.684451486495666
CHEMBL2363599	0.452351857330077	0.674489641363414	0.594596080310251	0.603700779238522	0.638225946594095	0.692572167975394	0.620899030555156	0.652893408226571	0.652077552077552	0.462875743644984	0.582833398969594	0.455830292002753	0.603235958529568	0.575342959350212	0.651635941338599
CHEMBL1613942	0.719444991330767	0.606781844967395	0.63484555239655	0.768195455289644	0.779730975418675	0.741888618655024	0.740988768061931	0.785880639022404	0.744309575126593	0.724734663549445	0.7098127914435	0.722339493613354	0.759383278349615	0.678298457404287	0.795648788693546
CHEMBL1614463	0.748051677859333	0.482774459393713	0.706949413415882	0.772549222733639	0.565606248959222	0.652716988328933	0.748768176583211	0.544522588201077	0.639578750435057	0.752327670897085	0.606991683260831	0.624144174473081	0.736438178828474	0.642427054472013	0.648006698086908
CHEMBL1614132	0.691736023140277	0.711491013762207	0.723791588721625	0.777966470135336	0.796723728794079	0.712003627369751	0.754765009012588	0.747573945485525	0.76824206469655	0.761096199605519	0.781126091344691	0.734503853048575	0.777846513450219	0.776511383924963	0.794924426549195
CHEMBL2363633	0.462064261141978	0.623320795868881	0.740521187173405	0.596784130967846	0.715858152111818	0.788099182074702	0.758197957013746	0.714835578916961	0.688711489694946	0.544960471266182	0.602868075773503	0.845652912213803	0.749182148128068	0.70414117886944	0.749337651380495
CHEMBL1963934	0.990076825789121	0.992546405350049	0.981463856470973	0.908932526276	0.984666816931245	0.973245397028625	0.955373614665932	1	0.99457270336566	0.979387531530552	0.999350756081525	0.998666201747069	0.966297095158704	0.995831902565649	0.997212072857941
CHEMBL2363557	0.451165223119624	0.795931473825212	0.686758346862451	0.512122902685812	0.877760294571709	0.837111275200649	0.697108947831731	0.781777650498002	0.769667986663823	0.41605318424745	0.699505525622705	0.606447070544913	0.675899896671956	0.755297744315963	0.762880915954959
CHEMBL1614283	0.735560379198006	0.87646641762632	0.781988730493557	0.891377878215027	0.902737326054024	0.797192474450874	0.87232411837675	0.852893504352807	0.702029785101709	0.826626261077687	0.802778412997935	0.742521536381113	0.807767050130772	0.873275022570892	0.732913836222284
CHEMBL1614548	0.855685656872535	0.895120352980943	0.976090126539302	0.893943158897051	0.879983627391023	0.993300321443172	0.883133378841413	0.926907452255094	0.997395785256026	0.833861459235618	0.86189702147413	0.986351112600179	0.91413434570867	0.884349272318778	0.998431841825076
CHEMBL2363458	0.380750523219722	0.400307879935227	0.329629524499758	0.554371976558497	0.437638709090538	0.51724848545126	0.519106959731374	0.40163266807496	0.494332478380466	0.507083339322133	0.359921851030627	0.558322116338169	0.562767430846186	0.519212083497486	0.572345496010204
CHEMBL2354217	0.842627633580798	0.787134849016392	0.923956725611615	0.925526929101859	0.87845000848906	0.893912341046712	0.896478521989788	0.895359490238558	0.938700192790195	0.897107987863035	0.86278995299456	0.962079953129729	0.889748998284829	0.873619081057067	0.926794478344535
CHEMBL1738633	0.980999780575299	0.973200620127988	0.964817908107964	0.986118673816086	0.969917416008829	0.962963575954814	0.961850566690632	0.926280567212438	0.964174440573411	0.96863919768139	0.979003601932488	0.972675404354398	0.964362387021601	0.968722406347597	0.963615480871018
CHEMBL1613950	0.697367583171232	0.570781979298981	0.646468255859193	0.816274219585126	0.728082298913948	0.724524518866479	0.694233792343918	0.692012357635499	0.753502687919099	0.694259935896846	0.707002291307101	0.830869107544548	0.784300971632772	0.631882795005879	0.790734639647471
CHEMBL2114928	0.160572998771735	0.344074290905173	0.299894053292671	0.135554762963485	0.168921554522323	0.112206524336278	0.10465844834261	0.130167518721432	0.132316935608067	0.161726880192905	0.161778961733342	0.166070610089011	0.139616528679029	0.143941575544235	0.0937824284531331
CHEMBL2363385	0.575388396235674	0.546987392446566	0.727029628083993	0.801557409073614	0.632441307121551	0.849383414998215	0.797074078493199	0.652423066720595	0.735024514803085	0.587337188516031	0.538942282677996	0.719380243574686	0.822922829787536	0.624230472168851	0.812116924720355
CHEMBL1614066	0.0929166666666667	0.0135135135135135	0.0964065854389988	0.0348790322580645	0.166666666666667	0.133755565899529	0.0606617647058824	0.0714285714285714	0.204088191220544	0.0333049007444169	0.1	0.150102018975764	0.0571428571428571	0.0714285714285714	0.134020960604908
CHEMBL1614109	0.721927230559262	0.481129917614671	0.517466239086557	0.645135641887448	0.610212585526999	0.573201427678426	0.787269183726872	0.495585039223674	0.494549810714559	0.659392105702741	0.612979806419872	0.596879807104125	0.757008411479338	0.626790279878901	0.453129280536772
CHEMBL1737868	0.634032463637727	0.847656624158814	0.71277052814486	0.549223413447551	0.473051465867195	0.796958520417569	0.484749809014515	0.608120783486418	0.537712040020224	0.49050650595273	0.528466969882753	0.690960389425863	0.216353382369496	0.710971352134135	0.526042629274837
CHEMBL1614477	0.74145425195589	0.557543098435331	0.83240051091709	0.806756840266588	0.722490690620504	0.719189551490236	0.835842684442736	0.589454932251835	0.75440741428772	0.752146184165508	0.718952605438748	0.843769123671086	0.799845015260596	0.67573737125478	0.760727486469673
CHEMBL1794460	0.712837493867596	0.757715829173243	0.786027822030664	0.813275796024248	0.801382604230814	0.818483180350216	0.770698071064258	0.781248419384685	0.833309414267193	0.806725677225004	0.809094858504775	0.831626478102968	0.812654115341847	0.81662309174739	0.799012828498741
CHEMBL1614197	0.889382873853294	0.985719557420447	0.954877168554257	0.892788252419988	0.981274607944913	0.97652143705456	0.903116547063621	0.976809394666619	0.979125052125018	0.959745636642151	0.986523593741724	0.97216647629213	0.906106392009987	0.975517727999952	0.949028582210766
CHEMBL2354228	0.762692487105121	0.530090628666306	0.785512905304572	0.691193284877283	0.610378020512472	0.87535563973064	0.707035578798943	0.488703279832342	0.828079537015941	0.677135465039427	0.643483999202384	0.946066896066896	0.728849143299109	0.510400656141472	0.866790248650881
CHEMBL1737978	0.905308340409863	0.852345964285703	0.883819244787163	0.920868319187298	0.835194937300965	0.884434504102077	0.89098711675893	0.809747801896604	0.817322466309796	0.862782704577826	0.827696810224668	0.863409920952257	0.906593598476492	0.851351448676956	0.871215990265555
CHEMBL2363383	0.598572692739359	0.685338672062285	0.64524250072097	0.491519672427601	0.614665719578	0.829084292119052	0.55687761365679	0.694018408492093	0.644090023167563	0.333056868172031	0.499083814184621	0.61021956069803	0.673692641413781	0.610005792281334	0.677024923190671
CHEMBL2363656	0.307452834066322	0.379097644805048	0.268148158964691	0.477858218543702	0.416463460654489	0.570964763829508	0.612466946561374	0.472141361927546	0.456680201313505	0.32619277536942	0.314193683368998	0.447097111238019	0.533150137286578	0.442235061540739	0.472417532977878
CHEMBL1614225	0.456865800149169	0.452252047488066	0.420304615993555	0.592078832378687	0.569818258179261	0.565302848939846	0.559115189745135	0.544060245706719	0.376312190225234	0.565388411381562	0.640685337145837	0.609721057638089	0.602811862270702	0.591018766906434	0.359544182468095
CHEMBL1738400	0.791581632653061	0.75141369047619	0.81020392158245	0.84117192331478	0.964204545454545	0.90055573262332	0.889471243042671	0.901208513708514	0.74965494187889	0.763482059490463	0.939583333333333	0.917727600218409	0.858163265306122	0.926925505050505	0.793566170094203
CHEMBL1738679	0.733444180890879	0.215048501192782	0.310530315444953	0.594142938857986	0.210755243949782	0.321533842439586	0.617402330530269	0.198995727761551	0.310646499848588	0.49588242207207	0.200113147416412	0.306568265548632	0.565180760848331	0.199517705925092	0.268507255507594
CHEMBL1738043	0.848254643286495	0.62092898735252	0.766987540106519	0.859778898135692	0.896916870813681	0.812439537719994	0.713699871314775	0.829810242135011	0.78702075665649	0.789449249755657	0.857937942478466	0.772456698741155	0.741090405340924	0.796892806211179	0.80074540907486
CHEMBL1738202	0.950755307604499	0.998033812722808	0.981121532127956	1	0.990510071795804	0.999316357695859	1	0.996498240700309	0.999316357695859	0.999054596969169	0.999356345408977	0.998667341430499	0.999054596969169	0.983293991546286	0.998667341430499
CHEMBL1614550	0.972646870765978	0.940645350605171	0.953777409628781	0.949708363883537	0.925059907533746	0.971509940280566	0.951509603881376	0.907782750861192	0.967239869105882	0.955585067446573	0.884792767927089	0.98804852425709	0.929033436528488	0.933093821875279	0.957922904171697
CHEMBL2363390	0.454680541453457	0.395694807199762	0.612267251727209	0.555982617275637	0.548122019143987	0.714594454595226	0.72851519825204	0.511643599443326	0.488705780648183	0.387126681065746	0.424938707110832	0.680592587489139	0.720340683918787	0.447245300593901	0.593233699732023
CHEMBL1737977	0.857918742648856	0.881396430854342	0.960804774434066	0.948284930359093	0.938129701321779	0.986021627358941	0.934124423166518	0.937528273966411	0.988255847050654	0.968407085724451	0.943042937237619	0.971032554623312	0.957081526157568	0.919206428140564	0.987142416876696
CHEMBL2114823	0.820027277097667	0.844052005822558	0.893890207456744	0.850168712437473	0.859886980718673	0.846227435720309	0.815446944367704	0.830615649579311	0.808852058581015	0.843290710299642	0.852559653604344	0.847339341126903	0.902589223132389	0.78840857530924	0.852159975411302
CHEMBL1243978	0.859107088072722	0.713514062242413	0.855564574314574	0.80973350305289	0.72202143230007	0.783596468890587	0.772908544358432	0.767628062663453	0.764054899349017	0.858954111180855	0.672375840776534	0.847990408284526	0.738399754091178	0.64985027127442	0.757973354631109
CHEMBL2363839	0.643013007673319	0.711450056293354	0.665791907229896	0.715249300031324	0.749516509843701	0.723588532742668	0.813032516816309	0.705352334618757	0.710319939778144	0.605563929731495	0.783696834457343	0.695804319150599	0.738503050378158	0.736376075836872	0.754938039422348
CHEMBL1243969	0.832950196352652	0.973944973246216	0.891976911976912	0.879598214698798	0.981863388327919	0.906890470640471	0.80746263481999	0.885959208960647	0.945065073815074	0.905118369285052	0.946289018826661	0.922810245310245	0.802629310884635	0.896275225160145	0.931672216672217
CHEMBL3215034	0.669548812124534	0.698807205231811	0.672876269508424	0.81260839894492	0.807867461726053	0.81634916400983	0.795911141680189	0.755250141891744	0.630515623619527	0.719947714042965	0.791350293064501	0.82813187220908	0.849206507203524	0.751087373758456	0.725821824980152
CHEMBL914418	1	0.995727024436363	0.958758503401361	0.999440690690691	0.999195011337868	0.900425170068027	1	0.991779083623652	0.900425170068027	0.946826644292192	0.976774220110415	0.958758503401361	0.999440690690691	0.984595366346981	0.932568027210884
CHEMBL1738197	0.869718942343992	0.667321828588791	0.71668461826347	0.915696198707387	0.873094381260845	0.733581528007984	0.812208106466745	0.756399415604645	0.683526005685142	0.893647163957265	0.806287424906797	0.689745535592816	0.815784439812026	0.723980761208104	0.715542109378324
CHEMBL698689	0.979087017588015	0.946583117736964	0.988130459284305	0.934046381414716	0.920575791729638	0.974086170240016	0.956462392163016	0.808092975400668	0.946583117736964	0.970514020998662	0.924284582938429	0.974086170240016	0.985178960844015	0.82036403767173	0.99429416737109
CHEMBL2363707	0.41798224631551	0.719240150263957	0.79714666044476	0.588456356898239	0.670886257844396	0.904857594246139	0.74376542375922	0.722173662374737	0.780303527025663	0.517204845945132	0.524703964242504	0.804303289228582	0.610519951939906	0.686768687721795	0.839984936915883
CHEMBL2363795	0.58049110776966	0.604697977746111	0.776585961011104	0.846412362634703	0.653554236139455	0.872520613760172	0.744014598040053	0.638201355140177	0.761616715467949	0.732339393266826	0.59573025219167	0.785363000507236	0.719065624516184	0.663937713679754	0.777804431265634
CHEMBL3215176	0.409161068816241	0.360964912280702	0.406582125603865	0.361617328749682	0.369082869446203	0.633035714285714	0.490045698924731	0.275	0.572893772893773	0.659859943977591	0.421860410830999	0.774603174603175	0.400137085137085	0.202475061170713	0.651284584980237
CHEMBL1614329	0.768634817363333	0.703788284998849	0.726818887947427	0.809767442343054	0.784621457627621	0.730771464210322	0.810861355318741	0.751057932903491	0.699721143539354	0.719384677435054	0.735938227008018	0.718410672589862	0.788372063645747	0.684649795453073	0.633617626096053
CHEMBL1676103	0.986053031107379	0.932892391742482	0.922466052114492	0.987681956228152	0.953548144194366	0.880952273025801	0.980426574993107	0.955748306386887	0.896006147015173	0.952936229978648	0.744272009332688	0.899229768429755	0.98906118842635	0.943804491706602	0.93213551836049
CHEMBL3214997	0.872716825927623	0.898106448459726	0.828700082865327	0.850930773896413	0.852545959694299	0.781447619939394	0.823742530748397	0.869054196118128	0.791534700949126	0.871732566773221	0.862038735057205	0.815136275317319	0.846563548946864	0.898029628171561	0.791825601704182
CHEMBL2363695	0.528735527344949	0.73328493404516	0.729108990364975	0.76692483355378	0.697706324142546	0.889300315649645	0.788317663188076	0.747618033521988	0.813422080824042	0.797640313590559	0.795023065767642	0.788850424878799	0.774713823445056	0.7391946700729	0.945311950647628
CHEMBL1794393	0.865734559336504	0.401632322109819	0.654094137265812	0.904738864383213	0.691765747291983	0.638920727550811	0.849198726819135	0.557583751792595	0.595809064636747	0.873943889677249	0.599077204969496	0.657559634971722	0.873392620231064	0.591057175226254	0.574740958204639
CHEMBL1243975	0.691612411554076	0.783773470896149	0.715823412698413	0.633987299896772	0.769044551939289	0.915345418470419	0.447074526034945	0.627667410562147	0.908712121212121	0.531640335399515	0.589243565888303	0.928118235930736	0.481756090528962	0.431548112870675	0.956439393939394
CHEMBL830839	1	0.999633666406163	0.998548104317335	1	1	1	1	1	1	1	0.999260218210317	1	1	1	1
CHEMBL2363315	0.586413924693591	0.530667849336214	0.575898796107039	0.603651363271803	0.546302483584041	0.657338967269841	0.656693706585492	0.580095966435917	0.499255319173265	0.556797704452732	0.613196896321345	0.620976363461996	0.655538388432296	0.501180448589025	0.518026601902881
CHEMBL1614117	0.705236450064338	0.808833886179908	0.921650528537255	0.779953525761065	0.919205196729797	0.996190577279329	0.681848898085313	0.816018888134743	0.982725680398326	0.656190982531674	0.851817017704049	0.968324461741728	0.651350126441075	0.869928043658585	0.965855839408969
CHEMBL1737951	0.79388907751037	0.577326930866731	0.831074666899324	0.774588626028255	0.660861948527788	0.897215389505165	0.68525538789067	0.47563073761648	0.746593095945402	0.83846167737043	0.648374763027793	0.841471909416	0.611502335088587	0.484010468817237	0.753816596329512
CHEMBL1614065	0.927214514800579	0.89760198261938	0.879644328423482	0.955580655018459	0.886634899743485	0.917082605082066	0.937214020372989	0.880311091137925	0.895818690546119	0.944482807414226	0.857131842933129	0.898661045301588	0.946795725656846	0.891845735851977	0.919155207176179
CHEMBL1614393	0.627488307692297	0.559478685205226	0.578264730888382	0.808702282579116	0.761250199974956	0.661512992549121	0.820662042159709	0.790410253509538	0.730265563640447	0.760747185694603	0.73188253364432	0.69824961899194	0.814756303915975	0.716484147976336	0.757792534758583
CHEMBL1613907	0.936329196223489	0.946553622238386	0.670785097255685	0.962160478797699	0.963613062113376	0.797489871012453	0.990383744131516	0.982936137095326	0.880878622783558	0.955933960574713	0.965468803325473	0.90386646478433	0.98865053965271	0.982112156089964	0.74653365690745
CHEMBL1964010	0.24973405893467	0.404013879863578	0.290768033930971	0.169930469344666	0.385378868013676	0.239061603112878	0.175978911467584	0.276057139865483	0.203951014299135	0.155883427920167	0.295354555375386	0.14348119876339	0.184732510517845	0.334004917110541	0.204246270946287
CHEMBL2098499	0.423259713537491	0.677374876660541	0.60518286302466	0.406080752036634	0.666506509439081	0.615005416266795	0.342842993214593	0.685630619588801	0.550303289195853	0.297770769180616	0.426724261594484	0.564575638808606	0.362720959262142	0.697694055928351	0.548909266283717
CHEMBL1963940	0.974924627944029	0.960078855862163	0.990955892500433	0.995718374624625	0.992788459927585	0.991466956041391	0.977230156393699	0.965861600838149	0.995582845577979	0.996116733556509	0.979969001384986	0.995394069051837	0.993458041207685	0.987261984689396	0.990965316551848
CHEMBL2363737	0.67829139661939	0.585329493909566	0.759967130181209	0.697713416181004	0.708402087845036	0.758935909486701	0.725368948980737	0.634015443388212	0.796457436817733	0.665182258587205	0.701511543687567	0.74094594826142	0.744500571462169	0.735155264523743	0.817564154178186
CHEMBL641707	0.813710834356516	1	0.963333333333333	0.830968978731506	1	0.918333333333333	0.794762572901482	1	1	0.881606282434456	1	0.963333333333333	0.732233945983944	1	0.963333333333333
CHEMBL653167	0.990465367965368	0.998252763659836	0.996502909487674	0.98639649061379	0.999122521348965	1	0.995346320346321	0.9983145598665	0.988848826935073	0.919171394480992	0.982421260274311	0.983369140026209	0.99499373433584	0.9983145598665	0.99163879253962
CHEMBL2303649	0.751428571428571	0.575178062678063	0.94375	0.885454545454545	0.565727328227328	1	0.663626373626374	0.342223054723055	0.579166666666667	0.885454545454545	0.512463924963925	0.579166666666667	0.507047397047397	0.378718272468272	0.579166666666667
CHEMBL830842	0.986099705358765	0.97263173882389	0.971122483935913	0.966676322981761	0.967204529844853	0.937501272074605	0.943783216046602	0.895561080687795	0.886496063658365	0.995204543929491	0.977930541434037	0.922865822725534	0.937194682636136	0.933065079940517	0.941808676382009
CHEMBL1963930	0.951176952913096	1	0.98149154937137	0.967385310699285	0.997968400003697	0.969305665474894	0.959335802649777	0.999444367262511	0.987054156468988	0.9740726946965	0.994929497836283	0.989820071378571	0.966017849398443	0.990257282897155	0.995831831365866
CHEMBL3215006	0.35266709560733	0.346642339996083	0.53317464551611	0.593885421248192	0.703880149966877	0.663256631013718	0.398029818746738	0.604460680636436	0.580824742695652	0.561633625884824	0.675249709316108	0.665134829665471	0.367346518972241	0.65148928908297	0.459259200894307
CHEMBL1614215	0.72501569326387	0.603348450440444	0.565948215274666	0.756376021502303	0.574495153973987	0.515155822802829	0.741917194386785	0.43983886053528	0.46349921702666	0.683012871483531	0.660071053597943	0.533479198014986	0.704211015702897	0.438752030601258	0.451166865229007
CHEMBL1963813	0.368003315003684	0.428423339504511	0.268467867025315	0.445396764348094	0.58480738624121	0.546139500815245	0.62431874893476	0.467691555788982	0.456913671039268	0.583164986943605	0.469209322190142	0.382916145544496	0.564715620522907	0.400438531376031	0.520938737563991
CHEMBL2114839	0.740424360359237	0.882367625305195	0.835122119351413	0.74409358013154	0.803595688243712	0.843021641012674	0.689606438672471	0.832557121990272	0.797826943354113	0.752823198600131	0.761899650738504	0.809121634740806	0.761656687044115	0.843310568493468	0.83170074832145
CHEMBL1738362	0.889104778877327	0.94744349509713	0.93570027841566	0.875244506189006	0.992352883957453	0.990135530680233	0.86975095888339	0.970145335735548	0.983552921918351	0.858958286596436	0.978833506805229	0.973179997575403	0.872142031629463	0.974862435182707	0.982361393764778
CHEMBL2114742	0.74569320332558	0.81136908773838	0.813049471846547	0.719960914061246	0.869340395465648	0.737055847596223	0.749780970971403	0.865859420161081	0.709787703360461	0.781114106410607	0.827868076314414	0.668823312690261	0.797084367423934	0.911877194945212	0.753638932380038
CHEMBL1613897	0.841208542726886	0.722007433871587	0.723244740336339	0.882426250773691	0.805977841463461	0.756318596617632	0.912028711861905	0.800280454588876	0.779550088931294	0.843723948391366	0.872796851747608	0.720262011929962	0.907884234487605	0.872350416493156	0.755395594918862
CHEMBL1614092	0.74267768046188	0.565748012465313	0.655085825136506	0.794220408370382	0.796912630253145	0.749384202755274	0.732150957195725	0.593538849691891	0.636023903885072	0.784022678357297	0.722938482418587	0.606032706847004	0.813508448241662	0.690848990613903	0.648297900258864
CHEMBL2354305	0.916665820339034	0.879236602516518	0.982489818386729	0.916606285556218	0.884579307428216	0.931097764530559	0.949480355737963	0.951474058550006	0.975010087357853	0.905329331050555	0.928853322240871	0.984197829528163	0.933429160515819	0.9147007486495	0.980073143793428
CHEMBL1738319	0.690489243321445	0.633612984559651	0.719012128299106	0.789694655702023	0.616658689203147	0.689063642522275	0.780516309520681	0.649368921671288	0.667275504545721	0.808075546025691	0.52521946939662	0.604817218635168	0.808709847239701	0.545887488220444	0.692120670158573
CHEMBL1034533	0.987382988533652	0.996208639705882	0.988247369142641	0.975011688892375	0.988814848856209	0.982657945688875	0.997632171401592	0.988814848856209	0.984562552486456	0.912260264599676	0.978194102160095	0.967758237997226	0.994946690827292	0.965570866504497	0.984892155506664
CHEMBL2363573	0.635456659490517	0.659592781845985	0.620441995579082	0.805845913390061	0.6826285789777	0.715995911127536	0.82991246162852	0.70350403096842	0.716246293812492	0.612433651912599	0.702075846267809	0.651290592943749	0.774089970848984	0.70615644745218	0.758684602710308
CHEMBL1243970	0.990796904054927	0.977423317560941	0.995459699031128	0.950951124771279	0.99352738713222	1	0.961333482141212	0.974917569960003	0.984828238844714	0.986805710192506	0.975554340863169	0.997783962069677	0.959593692588277	0.988062091120319	0.971117049240667
CHEMBL1738080	0.841312414293781	0.765145502645503	0.849715656543505	0.830828695114409	0.885244602891662	0.933890280711215	0.903715332286761	0.828437568747646	0.866957186334349	0.757409893782074	0.855587531408531	0.939015052792039	0.865012368583797	0.854142372231803	0.914423025436031
CHEMBL3214958	0.343261162633502	0.281866729749526	0.513437236390719	0.385170839258392	0.451098378595464	0.539165827547101	0.533970330062099	0.374510639338495	0.472452269102173	0.605490410773056	0.344593756517336	0.574443809267571	0.447609715262226	0.390893751150645	0.422226816919796
CHEMBL1613871	0.929352897365815	0.963924104902134	0.954951964047726	0.954653577191302	0.996157427329326	0.885367604475481	0.954478097366685	0.995210227077286	0.969305156898893	0.930656541104526	0.98911231615883	0.919866205467316	0.946085007074362	0.993357168433151	0.974384018500613
CHEMBL2114863	0.748396812009942	0.665008165193046	0.871415127033525	0.851478004307702	0.830892406757259	0.911138612024426	0.833587175955826	0.793795766704804	0.861939300167378	0.794952715951327	0.749358108135669	0.908684095314619	0.861303063542718	0.817907837601634	0.907651410767829
CHEMBL1614509	0.6255816239491	0.33428896156107	0.620370473404871	0.785936909942917	0.368341072574248	0.677404968601561	0.747656536408872	0.481174338147644	0.855818577225413	0.670370806863118	0.349359104437229	0.687447698895417	0.690187059552302	0.325872245047731	0.701489213227677
CHEMBL1613785	0.775023684534377	0.742027346471614	0.533378978390974	0.874071238804293	0.851560564450645	0.57566870496057	0.738399221407032	0.781145250071358	0.561948253488475	0.810009340123674	0.757342695157024	0.533174872033014	0.807456260499699	0.77982644108376	0.609247406194518
CHEMBL1738430	0.701944293577104	0.738278468279913	0.839644818020228	0.760120346601207	0.780800795392784	0.816729765511632	0.835303106252788	0.803137713332369	0.816507883462291	0.753430015284882	0.775374973904692	0.828391146807557	0.805242874111971	0.775113055074903	0.803182650211197
CHEMBL1243977	0.890457619758948	0.929933613049166	0.940877640877641	0.856179832625172	0.891841918123561	0.943753846235464	0.60625885113218	0.881867755238954	0.937188189669807	0.764064782193102	0.893969330968511	0.925119586976205	0.657727436197717	0.838108968067081	0.946066896066896
CHEMBL1738019	0.863152672795488	0.778628150749983	0.917073944495331	0.932801173518262	0.915717042691926	0.957923809021475	0.92531339755116	0.84647065016543	0.96216390931856	0.866446687495161	0.875336651129269	0.951402301099017	0.91168024955579	0.863017613870333	0.955099377101429
CHEMBL1738091	0.383681109339004	0.378166365296138	0.479138383349039	0.522979797979798	0.255674704406375	0.274605654274732	0.366712454212454	0.376554958010878	0.234257774986888	0.630998168498168	0.283761043311126	0.238627706547319	0.256778365988892	0.306609394734943	0.251519958752374
CHEMBL1614309	0.739515883941458	0.835795460260795	0.715173130916017	0.749970688022233	0.710148308674051	0.656186611510274	0.706904506662835	0.771029922388921	0.641907447533268	0.729791087457555	0.769213553157684	0.645667977881332	0.717840744851579	0.812925777176105	0.63443109108664
CHEMBL1963968	0.677483863736578	0.552757423684392	0.447186113315631	0.661785804149667	0.691801980546772	0.600886073233827	0.61276446587382	0.637643658365989	0.540341709836388	0.752051899920023	0.626171453757759	0.606514325687017	0.698782471612522	0.68328279256317	0.518603503912871
CHEMBL1243968	0.863478117206114	0.82726514266987	0.989429578849084	0.86193746603915	0.877485443375556	0.997559523809524	0.827135909034968	0.840244798788236	0.997559523809524	0.897596374452987	0.866162611806365	0.997559523809524	0.814915524520602	0.846430087221905	0.983167323947123
CHEMBL1963898	0.339051410115508	0.191704879081229	0.323955991638217	0.248786754854634	0.161729937715332	0.28063169371548	0.456827024254743	0.296341209276102	0.333422234826554	0.26029667067588	0.203710389383332	0.310013668332981	0.360966943565808	0.202443553700744	0.34389405672016
CHEMBL1614319	0.530436039442573	0.547704900204695	0.275648819355109	0.73693421642495	0.678157470762954	0.343702602732629	0.709258285211052	0.631536651907943	0.273803120965343	0.675406479264849	0.429830658112752	0.30477504849235	0.768812312645746	0.653942289302365	0.236650021597558
CHEMBL1738602	0.608641768460987	0.530477452752283	0.606655089731371	0.746498539595954	0.56974000323771	0.701567687971856	0.688260955174763	0.53267621724408	0.646349613888655	0.661270057331554	0.630277545468338	0.647572258875401	0.673729344008706	0.555244677167898	0.651915818367827
CHEMBL681296	0.791666666666667	0.216666666666667	0.987639146281826	1	0.245833333333333	0.996548644050582	0.708333333333333	0.195833333333333	0.980253590243338	0.791666666666667	0.225	0.98425850711292	0.291666666666667	0.195833333333333	0.984258586789471
CHEMBL3214794	0.847363357617901	0.392255058902544	0.571167107122902	0.846635592538456	0.622790823253056	0.565908560311297	0.611764761001769	0.533775811219197	0.518637409479705	0.78751736544144	0.592045462278196	0.528296108385331	0.555875977621649	0.440375085631533	0.579876566443798
CHEMBL2114844	0.659498574209649	0.710380974880707	0.587942564982333	0.694626450593395	0.737072349068365	0.730887410214994	0.711862272703263	0.757671070860989	0.678020686840296	0.703077877590393	0.792952023344537	0.572118608190996	0.714142109513436	0.761189914162833	0.746642966428335
CHEMBL1794484	0.536867145076842	0.581805158926998	0.548768665995729	0.581231364263341	0.558949179807988	0.681978032435448	0.489302507358778	0.540691801925785	0.683625621136648	0.566996987214374	0.570176311812394	0.514895363719865	0.513082793667342	0.565971343762538	0.699320541742934
CHEMBL1614295	0.981999988464511	0.98580904977056	0.952081297287291	0.963273109348531	0.991629155590666	0.961906235197743	0.976883341708763	0.989969423937062	0.96984431161408	0.935714053562474	0.983021542343604	0.939632253141152	0.989213566630817	0.970183361047919	0.996215701437818
CHEMBL1738422	0.910529258577593	0.979156558501578	0.987528966820666	0.986172655166197	0.938002969774354	0.993774684137267	0.981920719677948	0.965256850961817	0.99486681389069	0.983501229296586	0.968608660699757	0.998300210284836	0.990240683508692	0.973080921539277	0.990091662985635
CHEMBL1614072	0.670849385102136	0.620794163919121	0.654858790341643	0.842189855413505	0.751086310045445	0.813357960187365	0.767697170199201	0.719272450901684	0.751148518804916	0.786819428563337	0.740704652678302	0.697743123185576	0.830755720604615	0.704387404729537	0.787695574602258
CHEMBL1737979	0.955147789087894	0.894236348317296	0.854720952285317	0.976797489618373	0.950556659545041	0.851949464680352	0.964934690623146	0.900376951533312	0.886246478330956	0.956047251373793	0.884079543418689	0.961204964649974	0.983070214946346	0.909682289386302	0.929279368937438
CHEMBL918058	0.331099116305847	0.162088165162122	0.791666666666667	0.208680364808991	0.226952030812325	1	0.207274128292329	0.166312182441215	1	0.382091092694622	0.0576437735516399	0.791666666666667	0.214762144729526	0.11066950249363	1
CHEMBL1794497	0.886976135723578	0.935873814214468	0.903673806659688	0.946427251064134	0.952991538528722	0.930476548855993	0.960282114689949	0.952185922111136	0.960365323727108	0.951381867031169	0.900511946884419	0.917650462719128	0.942423492649553	0.961318232031626	0.962467924973061
CHEMBL2114727	0.882071791039701	0.860086471882852	0.961209097045949	0.942593007298456	0.929992275709651	0.97147730009687	0.912367769972238	0.950147809581659	0.934949263095859	0.953679320799484	0.927764865450065	0.978178692430805	0.9411478901243	0.92212890113554	0.931958074967155
CHEMBL1614272	0.278413031055637	0.320987958375416	0.444535213431111	0.463907326926209	0.474420358039329	0.358512753784556	0.306790119823386	0.430644206777128	0.393494946254665	0.39434504146215	0.472159955852559	0.403418127211916	0.43327786691171	0.396024009919865	0.426150172091736
CHEMBL2378059	0.990698592919083	1	0.997777069896558	0.986006479761905	0.990699228307924	0.997777069896558	0.979288422798766	0.994671991655687	0.995354758834541	0.997893550379937	0.994671991655687	0.998538545658033	0.988204280127225	0.996524758454106	0.997777069896558
CHEMBL1737863	0.711106923395257	0.677697323243651	0.565034165442103	0.925935469538611	0.815623408458137	0.80936360643957	0.882950515340322	0.816548133688366	0.635455975295746	0.894916191887932	0.820145799546475	0.810813165770981	0.875879398644518	0.801051109288977	0.677699878080114
CHEMBL1794445	0.131981780604508	0.267759920180822	0.460230379523858	0.392681559110131	0.291601584301164	0.592160535542888	0.167572320099629	0.319785668600223	0.78010162319224	0.458841500593691	0.29783296584144	0.560040127195998	0.270659105663115	0.442523095812569	0.829630059747349
CHEMBL1614131	0.0773152753155083	0.03125	0.0179531966709226	0.0924831915688399	0.125	0.0180008587903325	0.10714298311338	0.0625	0.0127401319328913	0.115076492873529	0.025	0.0124008608364561	0.111434752134872	0.25	0.0114270687237027
CHEMBL1614480	0.294268147156192	0.440613026819923	0.444993663716985	0.862068029268574	0.892361111111111	0.789926769895117	0.74721141073906	0.784319645732689	0.642950779706862	0.895459524135995	0.841727053140097	0.736345235979928	0.78479473292903	0.87401185770751	0.699424401745554
CHEMBL1243965	0.904154179284424	0.841913227507777	0.986907869442927	0.901104731878354	0.895241737994426	0.965390467855866	0.835073879978616	0.822856757424008	0.9112354725244	0.919260647342703	0.863751422647805	0.82545115879891	0.827794381867469	0.810452464186381	0.968005582763824
CHEMBL1614097	0.733161660885263	0.620780603159968	0.556582920925169	0.79751767807151	0.763576088564956	0.643982586692463	0.771643554233778	0.728949595666308	0.609234953591655	0.723367347245388	0.708576353806072	0.613542545343234	0.797635547072959	0.69401206765883	0.651897007502241
CHEMBL1243976	0.956565613386151	0.968467692709586	0.836787595073199	0.898688580104664	0.97463873126395	0.886833916570759	0.81145280670324	0.957664950560095	0.67773703306211	0.846709984919068	0.940122276655457	0.917461873638344	0.915163181619274	0.834172535562306	0.782386928516959
CHEMBL1963907	0.575001878499835	0.533907780072791	0.450308650421431	0.64918209766471	0.622588456621119	0.478073779772689	0.644417647445408	0.631710661211752	0.508890029775819	0.650366071836757	0.610007083452311	0.448784845804506	0.581628675629278	0.640882116502137	0.537352810760491
CHEMBL1794570	0.144233271509087	0.149248975724394	0.116964285714286	0.132151521546123	0.464058827505491	0.111496714070243	0.135804592237538	0.178975628612725	0.364774114774115	0.119211747014843	0.631960267638017	0.115087198359443	0.117745363503534	0.203865869061948	0.17970281986873
CHEMBL1963867	0.201999418353524	0.347194457914932	0.419668723171846	0.219576234236939	0.310519018264763	0.457025594480432	0.230018822741093	0.338773099832891	0.395883521451835	0.19132864867917	0.36016975455975	0.441308170377049	0.255126353438294	0.419409150513261	0.432141014999575
CHEMBL1614356	0.790096015074023	0.577288218791489	0.736776675966259	0.853246446444782	0.768534379218494	0.718299331064392	0.823414469693581	0.689916839151417	0.667971008287391	0.778799941271601	0.733045739924461	0.617632218379017	0.843402610325839	0.696875775171473	0.739717466484609
CHEMBL3215158	0.942326668539339	0.905612932767763	0.922312666432361	0.951499153224558	0.975429708955511	0.924166861961352	0.904906802204264	0.948429437998475	0.886230278855717	0.882032998677428	0.915746542108756	0.955707653389291	0.853104499382219	0.971883477606864	0.916857271198062
CHEMBL1794457	0.246693728557698	0.124981557235082	0.257641312935431	0.23695836639364	0.118231816832089	0.263295348442407	0.25189194204966	0.192687175764437	0.245050111179143	0.286058371698118	0.0883330213305231	0.801052631578947	0.24542695487574	0.229664307999538	0.289039444215915
CHEMBL1613813	0.683562175935261	0.68632260897319	0.71554871176926	0.855012258804018	0.809640312606206	0.674485856014873	0.776775822632066	0.793269005463383	0.579787109754319	0.762317110403265	0.779490678005135	0.694144019752815	0.794316966220235	0.746648095290152	0.656486737193628
CHEMBL2114797	0.782382914277735	0.751266247946345	0.97906180221866	0.808630570746471	0.843210894744945	0.950752215444437	0.624243081480617	0.715844698252653	0.833592213524527	0.783748370054356	0.781100026062906	0.859072483577871	0.701477603409113	0.706880375282792	0.935331528645132
CHEMBL2354207	0.912466304986955	0.975193946667786	0.896395889886388	0.946341256066669	0.983305544196528	0.932695940430458	0.937801848537402	0.976289459631185	0.92348955910094	0.934422661188747	0.982748021218279	0.918628318997371	0.937357810150834	0.982261540645717	0.936461230933011
CHEMBL1738097	0.618936307786959	0.56014512334171	0.43755753947878	0.751644885539429	0.772307377335573	0.795649338921518	0.812650744737392	0.49008840016745	0.340510610590097	0.772449502483413	0.730198656983956	0.662028927161161	0.860531813047932	0.44198689842391	0.351188903134655
CHEMBL1963915	0.90655936054215	0.871380437961308	0.97257730969978	0.994357086923004	0.92552369525101	0.991577490339557	0.97940611569036	0.912111444511041	0.983140203215619	0.987162580261794	0.91992531022869	0.984564234249978	0.984591142423714	0.907097077651699	0.985446093864941
CHEMBL1613955	0.657473057224204	0.631907813203614	0.62151131667328	0.739621645436422	0.66796826030187	0.47041881171868	0.675861379726853	0.571254632381304	0.591532482203295	0.667429621580976	0.558743019486169	0.584797906485769	0.664585288172414	0.582229152842762	0.54396983883775
CHEMBL1614484	0.974073246162783	0.917141106979628	0.954614892371685	0.952755182907403	0.883619472315756	0.912560122303603	0.982222377680525	0.829916097856149	0.908056958856599	0.946524818317481	0.857772435294184	0.861652845276268	0.980117176161603	0.872371022649857	0.903864558505245
CHEMBL1963910	0.912533111189268	0.976228280451333	0.991204957360057	0.947772894402239	0.994503629962601	0.996335875873128	0.941278449485037	0.980786741127008	0.991205929466697	0.923028138971697	0.992272099506997	0.998717672240193	0.936492431917791	0.994465240155979	0.995318675656253
CHEMBL1613861	0.872499260199419	0.833927573980058	0.928714326365793	0.892951991802369	0.897670192706189	0.939847407970468	0.884843378914595	0.896922803763965	0.871069353141362	0.884292114758822	0.855167469941517	0.95418167881419	0.863969514727404	0.838588301840498	0.94573315519943
CHEMBL1613967	0.738429998397383	0.672607963081671	0.559543582599194	0.844562701766753	0.752309077478112	0.681737906503669	0.786967013797088	0.783323646075643	0.643519599936489	0.733926798824738	0.741753895544281	0.60663612712559	0.788332674761887	0.689910641628432	0.641623234431253
CHEMBL3215154	0.704878550616939	0.724268438130294	0.729970762020539	0.723706486686028	0.796405259160716	0.742539211764681	0.705705558923599	0.760393136790526	0.55926313939368	0.636648876420218	0.670696052020284	0.60559620943635	0.756420618437473	0.810795086485421	0.636782504265803
CHEMBL1794581	0.823389229495923	0.890825765515862	0.858236305429237	0.832149533410663	0.876793653772897	0.912337481058055	0.85790730737907	0.945040042612836	0.913939455790962	0.746973557002862	0.860633810722085	0.888081858282059	0.846235467968657	0.936916853925875	0.932677954323535
CHEMBL2449559	0.997423510455603	0.999260218210317	0.978109974009097	0.999191325200709	0.999633666406163	0.955168701983718	0.998044844166514	0.998092828386797	0.917443483350346	0.955849091368989	0.99220176119065	0.986014839659061	0.998629464931064	1	0.954172884553432
CHEMBL1614425	0.68920034740335	0.68021121008427	0.717775658152178	0.777266236242745	0.660209502032609	0.584514660542066	0.620227056630963	0.639236261578665	0.499804750404227	0.727561066553879	0.711728742622215	0.668224553478569	0.610790448039878	0.632444776075941	0.546024664996831
CHEMBL1794438	0.767788517107682	0.813707838591203	0.799438324905195	0.799289168621762	0.901807046777684	0.838576906439844	0.758399559994826	0.828237778828716	0.800463043626006	0.759934427320407	0.907909739783614	0.851344809995997	0.721632187058193	0.937205451006557	0.828472157938914
CHEMBL2114820	0.933920030304217	0.820249140021471	0.884818895620428	0.890999495154417	0.928233075305598	0.948037448940342	0.920235521302595	0.858402761975387	0.97513193471193	0.94006517812611	0.900462225707789	0.862994127616386	0.945438618073852	0.877091096368384	0.929544550701865
CHEMBL1613947	0.580498563787343	0.638081304764247	0.594485481367966	0.790258820184168	0.781570785118081	0.605749651270776	0.68365940857073	0.790044295453678	0.761921118007324	0.65662372066521	0.741439390477893	0.658518355220338	0.712158206561923	0.778453024524246	0.731675442719698
CHEMBL1613876	0.554602473195491	0.496282951153872	0.540777510805567	0.66035444885332	0.594981039740892	0.665915434891004	0.637296063240078	0.625699014296917	0.606489161827784	0.719124282298027	0.650915364009494	0.543852769038686	0.679413386580392	0.551868122437356	0.638904145833979
CHEMBL1614259	0.709327402902481	0.723410643154177	0.842024480460733	0.846162987534536	0.890762296226701	0.952269590674697	0.630306176447796	0.854173060799534	0.812500805211851	0.7612367456396	0.83148517319113	0.870851413306405	0.669087012675008	0.789091638566183	0.888383948976535
CHEMBL1963933	0.0737145023435346	0.136944818986611	0.0860929386937886	0.0639157256804316	0.0945192128659871	0.285315269525796	0.0645754341443997	0.110440927536516	0.306954455950411	0.101038748832866	0.112732621784346	0.139707853601995	0.0813578329882678	0.136749188311688	0.179760665427749
CHEMBL3214959	0.887567262071527	0.81901480805006	0.862292745105032	0.838544759866032	0.830436662552007	0.892596167716424	0.862733625426021	0.804560000691912	0.874225861191434	0.744035872804313	0.826888033174625	0.890319944945072	0.828226525291176	0.789501939133944	0.89150681899767
CHEMBL2114752	0.904649233492917	0.84988628903415	0.889145010623747	0.909305648306208	0.95075835997064	0.959638157166736	0.906970207080541	0.914943893983097	0.967537639404975	0.914204444964735	0.924357970483305	0.911242484802883	0.917024631802635	0.927131085697626	0.941801415052758
CHEMBL1614516	0.0263157894736842	1	0.19	0.0172413793103448	0.223214285714286	0.461701509872242	0.03125	0.125816993464052	0.309259259259259	0.0238095238095238	0.525287356321839	0.262698412698413	0.0277777777777778	0.530416666666667	0.256111111111111
CHEMBL2354303	0.419724739839885	0.204967002688238	0.0668943737421998	0.306594028149126	0.207332629886094	0.0523179776178405	0.540724812092033	0.326562699863849	0.114728706750766	0.319223115324672	0.217941346085747	0.464477726574501	0.484659789253396	0.366924993883027	0.139282863363052
CHEMBL3214816	0.823703405291271	0.854197615111089	0.913300162699618	0.858001467223975	0.863555234482282	0.922879876751312	0.864491350311263	0.802239395026696	0.877167844849779	0.848007647081843	0.831137169793334	0.930507141308246	0.88670560260398	0.840856103502929	0.891565837038984
CHEMBL1614287	0.127775886747661	0.201370713470858	0.295009635305079	0.078605274750962	0.220333698222526	0.226088026056192	0.0811065600233516	0.245112122781796	0.145581292540599	0.064030397876164	0.19747348956829	0.202570972358698	0.0885470362138278	0.190193758921195	0.126652950207628
CHEMBL1614362	0.96542445943905	0.788291228477758	0.76704418019378	0.969993093761716	0.928326728480029	0.778886603144019	0.982651041211201	0.86213274176666	0.847265124436287	0.990045974580554	0.955821404314344	0.789391270518806	0.991465056706158	0.911137812949162	0.82146463841978
CHEMBL1614388	0.615481425393825	0.623641007400698	0.717055039441565	0.600499841340604	0.693931409258725	0.719817573792981	0.558161589551866	0.660002371926016	0.647547090148909	0.59354375751854	0.725408307732524	0.689983903134271	0.542955650293624	0.681619047673144	0.582577827441244
CHEMBL1614255	0.574890208608266	0.55050311215562	0.667508298033271	0.603159540634587	0.526973740638795	0.582455669098394	0.623527947901914	0.487263931453951	0.684807678014022	0.638071608417502	0.546916920419356	0.701096077327337	0.575165814706074	0.505912381634358	0.653414117461187
CHEMBL2354248	0.146536987916298	0.360519222840651	0.1	0.219991582491582	0.238786764705882	0.0333333333333333	0.191294261294261	0.527291666666667	0.0277777777777778	0.224969474969475	0.148996714070243	0.0147058823529412	0.235846560846561	0.385393772893773	0.0357142857142857
CHEMBL3215078	0.748294470901138	0.792255303497475	0.62272868640829	0.862420902800025	0.875024667592084	0.738080135804841	0.846787549995867	0.709038983244147	0.726915363152159	0.838346288622632	0.883908934115585	0.75720962163163	0.835158367649299	0.812360421787534	0.72843842870094
CHEMBL3214985	0.60052248228514	0.281945797235927	0.597558907466509	0.736752174197442	0.272226956250497	0.597311051610361	0.738521086321635	0.260950870382456	0.446815459154891	0.468585684599537	0.305642455178718	0.396838879873574	0.754884984158099	0.299899520017514	0.556848088778964
CHEMBL1738599	0.977597479728736	0.800858190709901	0.938426273126116	0.979277458176742	0.818238498087288	0.968203863310402	0.962112807282817	0.78454987231145	0.973088665105583	0.964385909189603	0.852471619941159	0.95441536388728	0.951147457430321	0.862745830108472	0.947888634362403
CHEMBL1963698	0.48997669752181	0.573953430838004	0.512204643737221	0.416736242465295	0.516864685492769	0.378587925326327	0.414969018217303	0.450996878452019	0.335533505030601	0.459896532430546	0.478916193805297	0.297430639868441	0.453090853415394	0.527693548969952	0.410490895124421
CHEMBL1794452	0.0707727348984679	0.0743260062302053	0.0186493963782696	0.0663015415378599	0.066089213784759	0.0200426010770838	0.0915839149284781	0.0875086720424249	0.0217134925273441	0.0571959270517925	0.0486204151161338	0.0138046026968004	0.0552051232749562	0.459837551195061	0.0570790816326531
CHEMBL1794296	0.845274758132393	0.882981755821203	0.955432548375409	0.93412480606385	0.97413632996362	0.983095998939894	0.85374710643056	0.972479503739293	0.981500292265292	0.928042716807836	0.963383129561951	0.979128151469324	0.898051653184801	0.981468511229989	0.991316765467522
CHEMBL1737910	0.43160301506432	0.646738580414042	0.661341792552387	0.483489559162438	0.79780615986388	0.696827751710192	0.47585361735196	0.718777572831525	0.620310291534773	0.598949270210948	0.691037194547719	0.706182658093808	0.492014965378095	0.748061499937789	0.63136091223083
CHEMBL2354227	0.896233801039089	0.928038893900022	0.846364858265889	0.891616281925745	0.943279870655031	0.878167818597637	0.913180425058315	0.914968807960172	0.798549836133868	0.958436038318917	0.953620580297506	0.827623211118471	0.903994808124652	0.935647071227348	0.781135259452145
CHEMBL2114930	0.968076978425424	0.894239830300809	0.993459816918941	0.952400200915098	0.935621305365737	0.994210207438648	0.978033672597453	0.978097752325886	0.981490488086684	0.97534789376404	0.962117262447452	0.986918996467639	0.965905068428697	0.914865480068392	0.97324262285727
CHEMBL1963974	0.301546186529559	0.400113450053932	0.113094858358016	0.103369815668203	0.285953741985738	0.174425476689628	0.310862272259331	0.474502020848508	0.0950835076740313	0.310916738490268	0.320420358282654	0.316761970888559	0.0920044008279302	0.360848353025155	0.122760909181295
CHEMBL1738371	0.414719720088337	0.29582886160613	0.465804157551945	0.472899092762175	0.321028224731322	0.318881506110382	0.38352138755267	0.452963326589011	0.332604070338661	0.376785355792533	0.284676907722355	0.327913046875853	0.319755136113847	0.391249097230144	0.441313482646468
CHEMBL1794548	0.544989814107461	0.371420614226396	0.427718455601143	0.628611111111111	0.432983457987693	0.770329720784266	0.315762600097638	0.5257472022188	0.896122433892079	0.432266714766715	0.379172858161266	0.235502043909581	0.346354087089381	0.553264539005572	0.925402475957707
CHEMBL1738418	0.741577362202362	0.527583529042697	0.750107252344905	0.895536342334136	0.749747318509264	0.887195961257256	0.857167999946232	0.764654850114767	0.883243569183985	0.871769767777008	0.725351528075124	0.81105163116036	0.875172777094187	0.745608084436763	0.887218524471934
CHEMBL1614218	0.867351930620932	0.863623790948275	0.701916189132021	0.770312921354582	0.850386078786686	0.714916700800401	0.778370122007784	0.85402209206093	0.706478364940392	0.772489093644403	0.857004558182518	0.679988591406889	0.783644923443501	0.882108145298346	0.684295668015594
CHEMBL1963969	0.802090788155584	0.712807273060184	0.907352589375575	0.7804951705364	0.77135120296067	0.879411010952253	0.84824780769071	0.707162030408709	0.790655151025597	0.766403864372427	0.731345634122809	0.88287084094246	0.897730516763826	0.762793451260229	0.807043640639725
CHEMBL1243967	0.944649096012047	0.898869153733001	0.99797879985627	0.925571332602588	0.927514205384321	0.99797879985627	0.907909680165003	0.872664055913052	0.99797879985627	0.955920628093196	0.879217388133343	1	0.912627286916246	0.896862551277125	0.99797879985627
CHEMBL1614528	0.754020898890324	0.527149078392065	0.635991208598216	0.846797355613829	0.729065899209445	0.732513222169262	0.839175869431476	0.711815584276911	0.674306622814211	0.7541230927201	0.697557115419467	0.646586749472494	0.840012937967517	0.677371688006881	0.697188896137865
CHEMBL1613981	0.494970191653193	0.421564803146198	0.661240678912955	0.756341911138787	0.616948650974697	0.822482178915982	0.667636372741346	0.524625873565482	0.752304998218851	0.688550457648824	0.63044690271578	0.757260378806393	0.669208536174797	0.567977149522232	0.760664746129602
CHEMBL2114814	0.511570563415629	0.723737195249576	0.543256254769356	0.630232869028123	0.863634157288783	0.684665252701173	0.499243058751342	0.775579078317082	0.486067728164279	0.680240957104299	0.793206776614704	0.621894270420545	0.553899697544965	0.771693711662749	0.594598212297526
CHEMBL1964112	0.0838043956672516	0.103376535946507	0.138691783033177	0.0960070605998318	0.117177640971002	0.177147197578578	0.0831358820097368	0.124084444322449	0.188717484362398	0.0795350786482725	0.150994669141044	0.195317475996695	0.0878664361404383	0.10465385172426	0.177138710216247
CHEMBL1963846	0.111817684697802	0.123020135030311	0.336342890004818	0.487986894972189	0.126625394947179	0.556983965312452	0.208717432473915	0.177728778052497	0.309530366041964	0.17309016122515	0.212797819962733	0.293527043125974	0.415960649001521	0.384803753355152	0.395672287222552
CHEMBL1963744	0.463204725232702	0.614772899190457	0.333560098646183	0.55533594497796	0.72284200074262	0.272192570061407	0.428932795659279	0.614937799955484	0.380154606178103	0.532140619393999	0.661857418761711	0.342315712625748	0.493070368252776	0.579317024148499	0.405368619675863
CHEMBL2114728	0.957351747482599	0.90144259283831	0.847980978336641	0.977052509454754	0.890587660499466	0.845666107122935	0.987737411438437	0.887568070897818	0.872001726397651	0.948294802737524	0.86241143305004	0.824811284169098	0.966931703267418	0.876134009760023	0.855826411640327
CHEMBL1613817	0.284387293491003	0.196796146734245	0.368439497010926	0.404590443067077	0.389783503224308	0.380971101968639	0.257211508938434	0.282638637055409	0.319191036098234	0.206174871388874	0.366548441587273	0.271846428055917	0.387897504184314	0.37926107312629	0.31648033126294
CHEMBL1738325	0.0906593406593407	0.0478626233101936	0.476992753623188	0.0245798061587535	0.0798245614035088	0.599206349206349	0.0398039215686275	0.0513157894736842	0.416524216524217	0.0160672660672661	0.154761904761905	0.149206349206349	0.033072546230441	0.551190476190476	0.169074074074074
CHEMBL1614311	0.728595249623575	0.834731460414971	0.888193978060777	0.698684359260552	0.737604306354943	0.782135122408058	0.77361168261508	0.715348624531788	0.639775486020653	0.826901076522563	0.698583631007963	0.732834257676402	0.783191666332423	0.777498263513703	0.651511009660853
CHEMBL3215116	0.254574070613715	0.103312010985409	0.138338374293783	0.178246826707201	0.12827607412941	0.169603942179536	0.199941383987278	0.112047274274503	0.100593417978866	0.259556660374199	0.159940128169876	0.0975945701994502	0.209770065251603	0.114623993647055	0.10002349317653
CHEMBL2354276	0.206035791390616	0.342815517392674	0.283110546205287	0.212190309814377	0.476332932571842	0.453175270890025	0.248852986912974	0.452017341954748	0.435627091356303	0.324521818161885	0.448934619985373	0.417979936137964	0.369285196668225	0.473835198887148	0.49851137157134
CHEMBL1614320	0.815484038047726	0.733952943385036	0.800874864966433	0.869331204569202	0.761907958879085	0.801753489224995	0.861347540567156	0.768058223004832	0.8209723799512	0.848934239304422	0.754742415161019	0.813034970085791	0.876236916271976	0.784964641396744	0.808102945894431
CHEMBL1794566	0.886982411423718	0.997366208000822	0.895134445120455	0.930637326038761	0.993159184553319	0.866609195136146	0.946425709017367	0.986755351456068	0.903275905804128	0.975925368711458	0.996280187528491	0.949745758987072	0.935022917794335	0.989208080030378	0.914923109529863
CHEMBL1794508	0.0481027427292671	0.0843137843626605	0.0147058823529412	0.16903667683702	0.329478560353819	1	0.105069521319235	0.179019371578794	0.166666666666667	0.147418739796789	0.279622538540312	1	0.380574912891986	0.130593785408497	0.25
CHEMBL1964111	0.425456385339347	0.584921995704831	0.491763702022221	0.576945545434996	0.5716041688718	0.481499054839824	0.481651395153651	0.482756583088604	0.359234411765216	0.594932609191118	0.462026979190202	0.380379591779016	0.456590737080293	0.478186510037606	0.348371279130883
CHEMBL1738497	0.796048395381645	0.809157428910894	0.59653785737859	0.923935911282565	0.926840854774964	0.721960025728368	0.913170100177037	0.897823966248374	0.641228589956278	0.926008065060529	0.854051765200708	0.671770951878126	0.915770597081365	0.815886433917681	0.650600066493194
CHEMBL1614515	0.849572237147645	0.925829680117717	0.566499608074008	0.896617557741473	0.987456389421871	0.608067142887437	0.809169063986055	0.984382731825174	0.611920369238473	0.893991419577717	0.970197795599793	0.697226577235637	0.788689064615944	0.99400162948783	0.606336353110851
CHEMBL1794356	0.966114146831708	0.904006086570853	0.935331834624752	0.935048845560188	0.922658283026532	0.927826063315976	0.96104449262172	0.907162014631944	0.9548618446283	0.931358083469609	0.916946715003173	0.91589004946423	0.964632520206783	0.926410209006923	0.938561511587241
CHEMBL3214930	0.213438731401393	0.258952647379482	0.224708455072619	0.521109956945642	0.357636368204166	0.386567448506847	0.252099823521001	0.232419711298376	0.312270240466384	0.29630503415462	0.321297479843808	0.415781608212475	0.283294772938713	0.240752300209259	0.382060708479206
CHEMBL1738025	0.665781054567099	0.80407729618235	0.705051026907891	0.846010342866467	0.860586442048208	0.818108134758095	0.720465303058537	0.824683967277047	0.799521552455576	0.785304438572934	0.868050857512366	0.802424807760329	0.815594627812288	0.841744471798674	0.793927906670723
CHEMBL2114771	0.340960709504539	0.358602394154311	0.336753162679051	0.354316128619112	0.353854788130874	0.346488713319162	0.372791529942732	0.348570283297854	0.441586561155006	0.413527977305031	0.331344721251577	0.475883881107482	0.39998216892109	0.346776332236773	0.440083160740083
CHEMBL1827362	0.984828238844714	0.990647917196354	1	0.987716894306899	0.99225788402358	0.998298611111111	0.987565876152833	0.991877884980028	0.996730769230769	0.932801456885404	0.984831095883503	0.998298611111111	0.992222222222222	0.988863850312901	0.996524758454106
CHEMBL1794578	0.677167269875776	0.773223443313805	0.80799429337175	0.728353834554518	0.855412246866538	0.777805999251193	0.659701062353913	0.710441562550665	0.693818912443392	0.760958849489128	0.803283018890551	0.687236066572988	0.70811350924765	0.808929290333101	0.720685925824535
CHEMBL1794358	0.51092284739983	0.0151591366380099	0.382906877487977	0.559294871794872	0.0294511554621849	0.133739655042294	0.416666666666667	0.0939470154258887	0.101822602328693	1	0.0285412262156448	0.268087134705627	0.416666666666667	0.0346689895470383	0.135979510741461
CHEMBL3214812	0.855806583470924	0.789091728249073	0.694952987635753	0.929166460340518	0.809729130636376	0.833563113914512	0.844102954151342	0.686733635368252	0.696705893215432	0.94158806601774	0.812730066937152	0.847102146772492	0.868783190936864	0.780874896293497	0.722463184745761
CHEMBL1614514	0.119698108557155	0.231935857522766	0.10637590592565	0.154293498000303	0.161265078131996	0.113749802782796	0.172002770830444	0.199758958231069	0.141410366874523	0.157002954243473	0.154607237001657	0.128327072288347	0.16932166558544	0.151897350602025	0.151650251053358
CHEMBL1613898	0.760300756373631	0.637597188412974	0.587093089168188	0.784441177356157	0.638933330164716	0.61173609595393	0.604997336122902	0.620018693891157	0.835973629155447	0.776314272885458	0.78893779080344	0.758732380151818	0.746665494344539	0.679490837793421	0.814739225421044
CHEMBL2114857	0.42716989626098	0.704230035961159	0.60081913702289	0.549747299762553	0.696554946419116	0.73824209107837	0.446790841523927	0.632002055553722	0.612471264821673	0.583608030498873	0.653222613900893	0.731443186097462	0.45986805923449	0.711199501437763	0.608022415471202
CHEMBL1738164	0.150670169092166	0.147641221802507	0.186490476043357	0.184801792317087	0.121081582949517	0.339071006331564	0.159152144884441	0.149674614008836	0.290529653760127	0.165648233652441	0.122723463781681	0.225180687330234	0.166640359473241	0.132135250232708	0.227714690377759
CHEMBL3215228	0.273397143809001	0.110337827320894	0.0928182766593667	0.336653904922095	0.156385521857362	0.0848896073654336	0.168576082707601	0.111283266016228	0.13631183690309	0.188105340503406	0.111770988572617	0.119065258819501	0.287837154549988	0.244851021751478	0.10857767965299
CHEMBL2114811	0.806417630845897	0.910527327718188	0.91980771856844	0.939483656369919	0.95372478126896	0.974330937307736	0.953319224936069	0.963198921447808	0.981305313080011	0.896944121456477	0.96124195602287	0.934040371580161	0.92092301335693	0.940751458833897	0.977328000912633
CHEMBL1737942	0.73620506441464	0.792957341803541	0.722682969528636	0.716695699526029	0.81107114791525	0.760737185003137	0.795485100865404	0.833321482326046	0.76597616563457	0.75967784777221	0.755969254906815	0.719789732252915	0.798099699510103	0.846118449255699	0.765288389453027
CHEMBL3215220	0.172691862245945	0.061489898989899	0.359327796591947	0.266461519308908	0.0450667282289378	0.370652503624401	0.167941192497539	0.0570547175428243	0.291314218010671	0.170715110641885	0.0653145859791168	0.380699149255469	0.120620835133073	0.13934331797235	0.30612647553824
CHEMBL2114899	0.111409904680654	0.172864564121399	0.150356470552398	0.0767160248596857	0.167735177909375	0.220966713850492	0.0908846501730166	0.150651845680471	0.208005121716841	0.0722275112730176	0.128178542562345	0.196863947340228	0.124403271743089	0.151597934359711	0.235750906090462
CHEMBL2354206	0.489119894709326	0.106168831168831	0.504858014368884	0.289902641218431	0.333333333333333	0.501936026936027	0.328535122285122	0.147281639928699	0.364669813860378	0.444526201455549	0.181547619047619	0.469154456654457	0.29131188012767	0.559294871794872	0.424944347657762
CHEMBL1794355	0.930126837379901	0.96465960161342	0.938384682358706	0.977541046183838	0.968687700843151	0.941291734159346	0.907467196902142	0.974210842431321	0.937613591993407	0.974403481126094	0.968778664186863	0.931649389543343	0.911460106513565	0.973582085405161	0.931738324504101
CHEMBL3215092	0.74134295670099	0.70943650713185	0.528188771680429	0.785215699147397	0.698139250627465	0.566819447335652	0.779987608434377	0.669888831772096	0.639015902192445	0.699992227911948	0.575045194305842	0.526530160133457	0.73879569654406	0.635495644256987	0.656449514790789
CHEMBL2114830	0.812926323673464	0.780158542441174	0.857507018935753	0.809621931280697	0.89519382387401	0.932847455149015	0.857112654932191	0.88483286525514	0.828810806628808	0.837504571179672	0.885277024959577	0.831281905647677	0.821514570956471	0.837285558364875	0.810151262977986
CHEMBL1613864	0.925676278018049	0.9884181321077	0.965625110094569	0.938040631615464	0.982985230358163	0.963527930519273	0.975095729019479	0.990103160435021	0.986711410188522	0.957275668364834	0.977934409778214	0.961864579476651	0.956888474187546	0.980420523526646	0.981397404831937
CHEMBL2114764	0.719051700914908	0.574898957408473	0.94682490835661	0.691137659097316	0.718621529874985	0.829457685617528	0.712559984052398	0.731617959676442	0.930535140341967	0.717276770069045	0.56123846443339	0.808990013877065	0.747098516749194	0.74625973630466	0.895963623552219
CHEMBL3214851	0.327548008921251	0.250364503943555	0.20294635573763	0.266740888036473	0.235925830407564	0.1651186621732	0.315952565224786	0.203382102851395	0.136385914622813	0.330508313691126	0.246428559470691	0.173764163129803	0.390068024340241	0.301001148867628	0.222550237105643
CHEMBL1614290	0.947531840954332	0.958460112615647	0.976640364039031	0.942223695635301	0.977109064930171	0.977563670149396	0.928947535408427	0.976488196180054	0.97645901973508	0.924288332696017	0.983928240725355	0.995993209079442	0.928757799628135	0.958443752218878	0.981158197360219
CHEMBL1964106	0.611314027069812	0.707550403327588	0.615919437220331	0.570586341457199	0.678311139730463	0.560459972548833	0.566385026928248	0.676440651972284	0.531412069157928	0.590987648209773	0.719210882555049	0.463791987053651	0.583835798414206	0.697691522946193	0.509757149249598
CHEMBL1794522	0.512567639290758	0.562148230283527	0.63681983079486	0.603066511753388	0.612737439842229	0.648577405180156	0.577581664868982	0.577460251419548	0.727606308496023	0.672394000017161	0.581385683137271	0.585234047994211	0.595730388411288	0.556690861631396	0.769678624396597
CHEMBL1614344	0.658739850779513	0.467049407198286	0.719283678142441	0.743007181027608	0.6283178882099	0.879676300618288	0.727045276378835	0.66498183039123	0.862201687964754	0.766279713720048	0.593176479826635	0.892374085417221	0.744340215983913	0.718811855020263	0.867072748746272
CHEMBL1243966	0.866064149493277	0.60282022041963	0.858758503401361	0.916979995458913	0.771437186260377	0.859948979591837	0.839320209053864	0.623508417635109	0.778231292517007	0.913013881379099	0.6576270673107	0.562611198325484	0.821916805405285	0.566814034258982	0.958758503401361
CHEMBL1614105	0.955708647314918	0.975166470203296	0.966126571645801	0.982522703626213	0.994633269597942	0.984866095965979	0.967608280142897	0.984697541072604	0.979144241246064	0.979172749807522	0.995598355118778	0.986775370350934	0.967142999158937	0.994660968927992	0.98329012381775
CHEMBL1794573	0.990155329775878	0.963295437137931	0.991516518896804	0.995758751071897	0.969732483610902	0.993726318138913	0.993042544071399	0.972321815363927	0.989138919701145	0.99009403204836	0.96584646843078	0.993785136689274	0.997612942118415	0.978473665386991	0.992465690627432
CHEMBL1614167	0.833348142442025	0.76721969215121	0.848916554227159	0.840880546458837	0.847773458732433	0.825303556328909	0.785134463448838	0.808785088653554	0.807095406518773	0.835261687118237	0.797714469294644	0.847213559334993	0.814628053012861	0.814660528324559	0.856866145905248
CHEMBL1738632	0.416424263929156	0.20060229308224	0.244906835994877	0.504892729465291	0.390358816128652	0.304853190179531	0.392959447420207	0.259687095520258	0.357434162177117	0.494928161579947	0.304435432328897	0.260200862089872	0.429779615078503	0.400918552882947	0.377727648766206
CHEMBL1738079	0.930741729002558	0.970872472713295	0.955730865189137	0.945491569617711	0.98562501935051	0.99499708082887	0.954596978277468	0.96877488049131	0.987589489955347	0.953225405050387	0.957724182910066	0.982723823397562	0.941883637514616	0.990503352770374	0.970091270177699
CHEMBL2354292	0.294463497489802	0.296769505701152	0.368185829144617	0.360854518015816	0.265216204173462	0.587048138901121	0.309723584505735	0.287120831674181	0.485598491119183	0.459641491138947	0.299145116366873	0.505873053096479	0.373933303349882	0.245947613130132	0.462758472207165
CHEMBL1794567	0.880207057471493	0.951224031992612	0.885287125389106	0.879097765556554	0.976840749849792	0.8796079229084	0.921556417602162	0.940862181719227	0.868214321450201	0.898133207712569	0.97840918656839	0.847825425846061	0.934940742525967	0.944421435763936	0.891302777514686
CHEMBL2114874	0.739056975294996	0.751461984218105	0.756588490411829	0.678620525495894	0.828498849919266	0.831480674390266	0.683855736893134	0.743020417877073	0.848736728078563	0.731806500843688	0.742288111397846	0.852839866029518	0.716287765389386	0.79118416969984	0.875010691789924
CHEMBL2114829	0.805989895800724	0.811190606498934	0.832938742384831	0.862144631430728	0.845447413227397	0.904802249534433	0.899922618606729	0.870851922325966	0.847039026100796	0.830812536725121	0.880950121257029	0.879692147572687	0.852422466503059	0.877145966159914	0.852978023657772
CHEMBL1964115	0.866884894196742	0.792674437918157	0.75062885618972	0.896293483430479	0.786858602119123	0.765585366676778	0.77242271691437	0.737326491337631	0.751017882551359	0.831893751611216	0.752835207917734	0.710581840211078	0.777181312919054	0.785510489254627	0.745362075676447
CHEMBL1614403	0.523849788734657	0.526296684681778	0.516772670611825	0.572639386112683	0.566656861656862	0.746610761270754	0.492310487434358	0.715850024185028	0.552685779870434	0.45736935403276	0.219387834387834	0.760667717128414	0.509049149274911	0.764124546582665	0.605215325211845
CHEMBL1963777	0.70249469009451	0.767332165899245	0.69595919131701	0.805975417747504	0.755654780401145	0.651958371867581	0.631987159192182	0.730435277309691	0.665551888864509	0.705162514296869	0.73268101373412	0.615910015466317	0.702965347084735	0.784349665479899	0.68560393208399
CHEMBL1614310	0.582850032552213	0.637712262012938	0.675006798756799	0.524476336388269	0.71989340370323	0.904880952380952	0.631175127936132	0.635552269408382	0.795223803973804	0.54896448765871	0.60049269252657	0.736285658785659	0.659808314217976	0.635644067752603	0.900766178266178
CHEMBL1033994	0.741115047819542	0.844598913944252	0.921746878023891	0.665125886459044	0.879470650137207	0.901827048941461	0.632147442766954	0.796793052159565	0.871998338972204	0.68007517035301	0.82504036667709	0.954025682905868	0.64542152880091	0.7975354833953	0.910776855651681
CHEMBL3215187	0.966249875069176	0.894354538737379	0.906591815744041	0.98801597876752	0.941282426292344	0.95624080418402	0.993048109288902	0.926016475835599	0.939936280423694	0.987355214679686	0.928291899237983	0.931428064373341	0.994763977788954	0.923027915076352	0.94456571648361
CHEMBL1738482	0.991142595924324	0.950190625977326	0.953450213591075	0.992574151774426	0.924798285479098	0.952060305515585	0.928288444894097	0.90481258837764	0.985767712544958	0.976833458730317	0.902616993186132	0.931254327533112	0.974560551940278	0.885800514469376	0.987947833438675
CHEMBL1738512	0.974961538111039	0.944311255363976	0.999827994028133	0.986104828432677	0.975620903014284	1	0.990143734609643	0.978994188791433	1	0.968147289154829	0.958332375658977	0.999827994028133	0.992181755527681	0.966160422260538	1
CHEMBL1738253	0.931739539421748	0.960950455221309	0.920727338624299	0.887440889515676	0.943748595991711	0.930220648454212	0.917422080846752	0.946192900844194	0.929855097424258	0.914722630173568	0.968444325814817	0.95487837618376	0.937871994571032	0.957712235861997	0.928474662905091
CHEMBL1963806	0.925485051308031	0.891313987425252	0.814814229232162	0.916223623607163	0.876937850011309	0.792724368217575	0.850553087061055	0.840063115894038	0.805812446358335	0.871016464718095	0.82531690806176	0.765733429632285	0.867719114650997	0.880212069378518	0.785536242863878
CHEMBL1613787	0.44299268844566	0.541318095645733	0.403743429347496	0.482362047356535	0.522284312944348	0.421887054592621	0.35806579162773	0.555666880511099	0.338788179839465	0.427655207899874	0.455428281566141	0.331877882294162	0.405310083571896	0.551087049479446	0.395345260469537
CHEMBL1794320	0.1	0.385887445887446	1	1	0.464894480519481	0.427777777777778	0.1	0.364285714285714	1	0.1	0.110901775293223	0.693906810035842	1	0.489596861471861	1
CHEMBL1964023	0.343982492128995	0.255504945291964	0.259026825331419	0.34828785510482	0.327492747182555	0.256253552180468	0.312353262239376	0.242099874985203	0.305753711070101	0.386680264800587	0.337756798141919	0.272655026821945	0.348104300736418	0.250697908948624	0.328158999743369
CHEMBL1794571	0.585455347868755	0.596506830941005	0.712876892895891	0.560867895680852	0.541272722128515	0.626884335089421	0.550335166486171	0.627991911380454	0.660487753893693	0.555435603908539	0.592061188046412	0.620871912160165	0.527177623823584	0.628547874115839	0.669639140766803
CHEMBL1738670	0.928520547746208	0.939556665778579	0.932061856077157	0.926746103334934	0.920123881797186	0.955335634099958	0.948175478536096	0.907950619892589	0.958500529129962	0.915793478184753	0.910125071424331	0.95112858953884	0.936092686264154	0.922840254277876	0.945033055109193
CHEMBL1963838	0.270396411310756	0.175100702933579	0.314345903370145	0.248438601842227	0.19543409329534	0.302668410876391	0.257732505857246	0.172923734080579	0.327056412748094	0.255597082659036	0.267717922541014	0.28992267603295	0.254835348839294	0.165880152023558	0.30394288667425
CHEMBL1614034	0.948986086336732	0.96573322323024	0.926782195420109	1	0.973934155920226	0.913681003495057	0.995140675580766	0.991002772568168	0.946113329122378	0.991889704241101	0.969568529963691	0.923055641434576	0.99611657569691	0.983124185707287	0.968397180732742
CHEMBL1794365	0.981343453274135	0.943272320556703	0.929002548961897	0.989095176181502	0.951186094114342	0.940398612287283	0.971254533205169	0.921932011732375	0.934772668537539	0.988474005771528	0.921374461735164	0.952103097574575	0.982239510208682	0.951452227230672	0.909892428420057
CHEMBL1614001	0.0151515151515152	0.0438023061588035	0.0161290322580645	0.0128205128205128	0.0473843635301969	0.00666666666666667	0.0263157894736842	0.028304317060035	0.00819672131147541	0.0166666666666667	0.0357102243631569	0.00454545454545455	0.0277777777777778	0.0246589689688001	0.00568181818181818
CHEMBL1738579	0.852989190277038	0.87263291964377	0.778875983013702	0.803938600116556	0.868790794298996	0.725320866457452	0.805075400964367	0.818204930922059	0.800739375233218	0.744967770986285	0.769098229593341	0.741298727567875	0.849471505175854	0.875125901130323	0.748604277431744
CHEMBL1738407	0.574669176959862	0.401908476695275	0.405213680851805	0.674673016019549	0.545393489332123	0.396607184607186	0.584072149439551	0.423995248254293	0.321321852611246	0.645160227092509	0.431396361922939	0.361010247004137	0.660013560619377	0.471368830452528	0.315761729441622
CHEMBL2354256	0.946357644546502	0.940833800279728	0.941926515014418	0.947122846493801	0.958734470364387	0.923552354601177	0.942988837277021	0.944460425852441	0.942951517192861	0.929846141231746	0.937839718270716	0.931019730004156	0.94746946042027	0.960168813495326	0.938452861706351
CHEMBL1613941	0.682455161548739	0.701352256367588	0.857144862868626	0.687343041412527	0.696781924284458	0.841251804958658	0.811074130925168	0.743372442366087	0.669690340466935	0.616733024335986	0.767180288688443	0.856555453780951	0.815098574560432	0.760489386223919	0.738248787819182
CHEMBL2354274	0.991955443673378	0.976286966730024	0.993805693401085	0.991897702748863	0.972622980001816	0.976738647443005	0.989186529043751	0.990741450411416	0.982240840343197	0.989983152069972	0.985732953742482	0.965832384163781	0.98701246849644	0.964228062084728	0.983670295042655
CHEMBL1963776	0.150048067074915	0.440955721569595	0.342688834560998	0.143352954092118	0.451063256892267	0.407775816061962	0.287055089474444	0.489828574133731	0.193477764095208	0.120358483065042	0.296000805733152	0.310987602018993	0.321105814764494	0.428324970397922	0.264654545940812
CHEMBL1963778	0.717939072009151	0.591893963849626	0.684931387052305	0.815546145516607	0.762043950304779	0.68333179298344	0.808092704535835	0.634710289764072	0.740338661767602	0.864404604824797	0.6569365679541	0.659093374440607	0.815880822048462	0.644321732499496	0.684313656187536
CHEMBL1738642	0.74700970520777	0.674221896106427	0.651071600097504	0.712959576559188	0.706367449275599	0.692344759087266	0.811883218736936	0.754121076600851	0.765948439438028	0.765249380134189	0.795663356486258	0.74720060361174	0.820003044120558	0.778537485450418	0.797661848286941
CHEMBL1614434	0.293427783200324	0.354066337070456	0.296227234507551	0.449153628733567	0.356790725423686	0.494243254414854	0.38673360159892	0.461136606036396	0.341333554969427	0.426041616139503	0.2513176151864	0.413067374592867	0.447478359812387	0.328707588786393	0.374023944836146
CHEMBL1613762	0.996601159174059	0.989233508325684	0.984491972697548	0.993605794980158	0.982480350151232	0.991180141089884	0.978117538224176	0.992265590403462	0.993235280052157	0.981650284082097	0.986707494440049	0.982412469626047	0.980437660169557	0.991187785869747	0.992191363943687
CHEMBL2114761	0.284704157734956	0.372326171270655	0.291468775689956	0.279847844356365	0.373491514148112	0.320089901916889	0.377374031801051	0.447782252739553	0.245472244030478	0.306807777149773	0.414369817283462	0.295959000401139	0.384593088627268	0.37524069538026	0.242667696939205
CHEMBL1613991	0.925796434303474	0.972804784425542	0.955007225231946	0.943394890560246	0.946809327301244	0.963713276697106	0.905758419830088	0.966951800907651	0.937162668859991	0.925703279063964	0.94419737459522	0.944297363278154	0.912687375014176	0.965078479931322	0.941281085865457
CHEMBL1614328	0.854381508791509	0.710905520019387	0.734014045348896	0.87147419883363	0.800242675942605	0.736692769681295	0.912603545546193	0.814307070161861	0.78467753073869	0.856531563096542	0.87071311166867	0.725281133604383	0.903534081576633	0.861754505897819	0.741879293537897
CHEMBL1964117	0.490432069416181	0.645541773668501	0.65754189020056	0.673831348977942	0.698755587688115	0.642380342986942	0.620332466084921	0.55107097401404	0.402029365402459	0.642671038611376	0.583499560124842	0.552587697572644	0.577521077717372	0.503552562294648	0.427785160296986
CHEMBL1614104	0.949524860938349	0.948786957083922	0.913846293453437	0.972639192017302	0.97999108759304	0.875221157862712	0.961700959994938	0.935062501478854	0.899584715481163	0.983495198348479	0.98310844657148	0.912307551316541	0.948453956586009	0.943134716326677	0.865717283885054
CHEMBL1964103	0.750054561057501	0.764646997956342	0.638431997605792	0.812540296748916	0.718423371599403	0.549833587958536	0.735081736244003	0.753384928982505	0.523252175999312	0.799091232818907	0.729211099555332	0.45415381071035	0.732431448582062	0.734305773026798	0.516223233055905
CHEMBL2114791	0.974265843426533	0.987686953297863	0.997265520515091	0.976657012991136	0.983129117881755	0.998066138479888	0.960927505126356	0.976668193295715	0.990080828973235	0.978265557539274	0.982176349879673	0.988059500484513	0.942228990314751	0.987608087661355	0.965837076924919
CHEMBL3215171	0.0269747725392887	0.1	0.0183501683501683	0.189393939393939	0.05	1	0.559294871794872	0.0238095238095238	0.238095238095238	0.0412917978707452	0.25	0.708333333333333	0.0950367647058823	0.025	0.139880952380952
CHEMBL1613874	0.615717074300273	0.503124815684122	0.446928169183204	0.69110075648292	0.701571069632982	0.706563324742358	0.707502200052718	0.671733378036831	0.610464089471335	0.746089087419923	0.63502773542544	0.728474866541436	0.676381200118679	0.574551127993561	0.662010514529168
CHEMBL2114719	0.285621292019024	0.370733723490043	0.189457601920604	0.266637693944411	0.237302274169491	0.292620436076607	0.260610652025174	0.289952729551535	0.31258924667262	0.319634543615417	0.349478398049385	0.307946960130249	0.298463160558405	0.244759733913897	0.33543287563604
CHEMBL1738485	0.838062178604886	0.88727948304526	0.930318476377319	0.884065899862371	0.919713959159459	0.963122263261822	0.906407076880043	0.898446292026497	0.944556885401414	0.88776987188318	0.891407030520374	0.914899980438475	0.917046330063493	0.910857410781346	0.959265266612491
CHEMBL1614288	0.430363733021442	0.439442488710339	0.541635683911577	0.696469015042787	0.564512465466023	0.768141951861922	0.674212455883713	0.601920861838092	0.755595118384246	0.685249190759775	0.508563183589207	0.70981325653463	0.66764901251777	0.601134708278471	0.75762123736475
CHEMBL2114748	0.436701140128476	0.605851954969011	0.463465483522131	0.417272529732803	0.634333597843955	0.595553768935923	0.37288766122882	0.630980979505979	0.460151567558249	0.455541903672038	0.609735459709874	0.538175173917595	0.411120597366814	0.70320139356046	0.51389206098504
CHEMBL1738610	0.774579732924208	0.830683614457665	0.841648468290829	0.81604874384332	0.871568221918837	0.874206342682033	0.704758633916037	0.848264913966127	0.825463619007888	0.782445438473456	0.859575950475837	0.834165803656272	0.731117549181821	0.878045791784174	0.833937142048309
CHEMBL3215128	0.932076872080329	0.922719758500182	0.86994468160048	0.945340527738643	0.964013912118601	0.853499158902227	0.968523119789257	0.949404093020707	0.915073406475323	0.964149951933913	0.966261155268566	0.914337925696838	0.964287487145271	0.957540337998664	0.900546302701597
CHEMBL1738611	0.986642274273473	0.975998596662305	0.953823772774789	0.99326469440716	0.987476300556229	0.967991640377255	0.993632281159878	0.99221804169159	0.967166451092604	0.989764342283753	0.990857471315527	0.967050357478937	0.995366515636313	0.980572031009144	0.976878383313475
CHEMBL1614247	0.469579253524075	0.681513454230795	0.61780638148954	0.652471365150302	0.746058955937756	0.722347632044059	0.579964657267091	0.727989441889649	0.690319252489071	0.561488441394522	0.696096755769196	0.672816153623336	0.535529352607554	0.759204675678106	0.670887405518994
CHEMBL1614314	0.189848712348712	0.141299977374212	0.0989370107017166	0.0698418339880472	0.0964594085426584	0.158858959975951	0.0707834684991249	0.0976815180643302	0.101085720078916	0.0341478034617147	0.107467055972093	0.332597297842307	0.0545315606997991	0.149536912633369	0.150514276856988
CHEMBL3215185	0.241732661106194	0.175596852036064	0.156638972599368	0.353091082249239	0.382927858853515	0.295949314938158	0.38038013022229	0.295885066764826	0.412037595145826	0.398232792941295	0.279273649111761	0.156792721856177	0.490848507019198	0.359104578913006	0.129857680403849
CHEMBL1963799	0.901328757535306	0.875133799175963	0.862679710056037	0.925152123710242	0.895174209923107	0.852057622020919	0.877270984989983	0.847747455383085	0.88496309957317	0.932215847418477	0.880974693117453	0.870788210826189	0.876333651697957	0.859640417119273	0.870541120741994
CHEMBL1794475	0.602328235505707	0.669844895661835	0.780890339497818	0.743029578942683	0.857059243773687	0.814262490428304	0.719797110450617	0.725023028066435	0.688994044294847	0.752859243767391	0.833130127879112	0.707311421068878	0.747706843386235	0.796347176646656	0.739653513527612
CHEMBL1614549	0.213141695428753	0.250862277786834	0.192405852925923	0.437099710042414	0.303893294061865	0.102625674203743	0.344545103393543	0.295903627211744	0.13710907260621	0.398599624409321	0.288433879445339	0.211619039706816	0.320357928099753	0.333019484906622	0.0849055815161859
CHEMBL1738171	0.19703101601793	0.563894980288655	0.341133438903362	0.401122331243622	0.751822223835314	0.293863787861387	0.382050783317937	0.566168728239436	0.339705225715992	0.477858094560007	0.472131787371708	0.261624115613656	0.57703940667176	0.561530867358653	0.289922454170034
CHEMBL1794387	0.448732716180455	0.628124628588144	0.62691466919662	0.545761376936743	0.671172599484549	0.618395840831271	0.538552347797157	0.652985251817998	0.636049952276681	0.640694969129724	0.647801812818576	0.552145477801871	0.569401800974087	0.64203023890273	0.706390116330493
CHEMBL1794516	0.990475649813943	0.979861576932736	0.989692944893093	0.995785781698846	0.994384610657228	0.990811508133582	0.99579498009597	0.994915933461768	0.980011498412686	0.989846084592863	0.983981092483187	0.992108663900282	0.99796914650733	0.993887974303123	0.985766228900021
CHEMBL1614091	0.866028210129096	0.953478962058699	0.993945533559698	0.874888386750829	0.991165869910568	0.994928029624217	0.968544301141766	0.990808492454413	0.992950220594269	0.966580412357708	0.981285455429785	0.996747398219901	0.965685153718343	0.994851183413744	0.984743531277542
CHEMBL1963937	0.923093809991003	0.913431057458231	0.938870002213923	0.955627124907302	0.948559929863689	0.96787535850379	0.910473940569287	0.951778398464411	0.954920914033109	0.953397578343069	0.935726281896954	0.967806710585261	0.928031744892847	0.94606191398901	0.951054660032595
CHEMBL1614385	0.118022959040099	0.0710316709923375	0.0648744683058409	0.275622926127424	0.0575076889442836	0.108031771168148	0.329826194514214	0.262161692344627	0.0808040442791082	0.178534321910003	0.176354332020403	0.0475623707331024	0.430276205282219	0.0800296043350291	0.13296568627451
CHEMBL1963692	0.773727178126859	0.826637573725588	0.694965484781444	0.74301781238204	0.805701648572701	0.607293382613867	0.769611466909999	0.782342093612966	0.635836867548931	0.740310493936322	0.838182166906722	0.563595819372218	0.784061091059627	0.814370183481412	0.674381736455656
CHEMBL1614086	0.888534535769725	0.94486158328656	0.833972845670044	0.958437855751102	0.977870539852151	0.801279276394175	0.90830160090124	0.971768982096182	0.859002635034218	0.980580282981039	0.979170302181325	0.844174597946328	0.84256026813625	0.988388664324849	0.889478830750561
CHEMBL1963831	0.750422094735603	0.766855795911246	0.57574574116736	0.78689075315993	0.803664432866999	0.650071345857756	0.710469923496979	0.618334808839728	0.551511742614847	0.824026082970202	0.721022658730643	0.608062001951176	0.749517754683703	0.713441778726769	0.589486456492916
CHEMBL1614016	0.889409543616814	0.874170368826093	0.811310784431099	0.881620012851412	0.919452158526438	0.903999957296931	0.895896862384727	0.942321787784669	0.912851414608209	0.856996317990297	0.898148930977335	0.887636804475843	0.922979247017156	0.924839891703488	0.916388433116311
CHEMBL1963758	0.36486677112455	0.261330008370558	0.354354991860265	0.420992059192154	0.332274336045846	0.36037469097988	0.398237730414167	0.248652488778291	0.462833237974497	0.398672312368208	0.304908977210441	0.304290842159617	0.372733014435344	0.349033726623066	0.466170460489356
CHEMBL2114737	0.345664339424197	0.2389933804975	0.454689421523069	0.567906883304684	0.385459898703907	0.303501725681263	0.540843355448668	0.320211097846634	0.476867849753893	0.453636836369906	0.257273267927164	0.338274131722946	0.509417413898559	0.312527741742293	0.424215171524943
CHEMBL1963803	0.467519966003039	0.147910537132477	0.520594591805027	0.460278208275128	0.35813604159117	0.57765529861041	0.409657921694078	0.269437376614563	0.59530194100928	0.442788936270467	0.296822969040238	0.519250628698291	0.447723881592787	0.360988369744308	0.649458800216591
CHEMBL2354269	0.947057288556168	0.942878657969889	0.944854422622197	0.986494518394463	0.951064195258523	0.943244681600561	0.975448696211281	0.972078523825471	0.97029297384803	0.976026465021266	0.9547616750949	0.960088106159384	0.987639169982057	0.940135626675647	0.976974322198128
CHEMBL3215112	0.948582932228954	0.99640864452288	0.962427980920352	0.972380225870655	0.996941794919052	0.936102653076429	0.94096112728484	0.994359635172681	0.954506007528345	0.96220027612247	0.988820153736157	0.905956680507069	0.950761390987657	0.990658523834972	0.960713121126535
CHEMBL3215096	0.82674948899897	0.705310327458217	0.864864916524772	0.868403995556882	0.649547309675246	0.88451099978752	0.791092028251585	0.719381405852741	0.880403825047597	0.814129705393785	0.681211670328233	0.863401279187627	0.846248164987229	0.696269080924438	0.897417848658767
CHEMBL1963687	0.517119616735515	0.544691449780818	0.542893923592175	0.634741305252546	0.740493490169473	0.475544330389693	0.600064035820928	0.559976040898552	0.478559345617916	0.609629995293238	0.667823702502452	0.426442037505286	0.564017961042215	0.686299147513456	0.483544822748612
CHEMBL1614423	0.695981817994308	0.806706246161085	0.434491477011932	0.806858184909557	0.918698558278345	0.738064774864777	0.653390134307362	0.829827463875552	0.725637058425293	0.722120681579153	0.926978019235536	0.691712190812976	0.674625195129193	0.858959686857647	0.712145475676068
CHEMBL1963689	0.306260017346002	0.223292156214686	0.0826478474534394	0.293239578603626	0.468397891345719	0.0998742437000891	0.331086691233421	0.29059326740016	0.0916368996378872	0.30506608579314	0.456321175787814	0.0846870442282756	0.416776617981772	0.405659130924289	0.0979014897018422
CHEMBL1794410	0.917622714900484	0.885997463638632	0.852339494041773	0.970034261219803	0.926363465483852	0.912202506067208	0.909265290387561	0.833502372514958	0.868538887792353	0.950481627344177	0.918439090900144	0.92199467789046	0.908713334283334	0.851859587023972	0.850200029124868
CHEMBL1613928	0.716672901640957	0.707229986297417	0.651594802427804	0.694909654127391	0.648178433613097	0.535322465651532	0.682021300512044	0.638590296845108	0.506164629221491	0.699345836775778	0.657923623566976	0.554572934059714	0.737424395215915	0.655710379855678	0.505471624439536
CHEMBL2114850	0.95292489282181	0.956925351763629	0.945219965659769	0.954109290811851	0.987015495157761	0.909134318308677	0.947122299205136	0.978844573950099	0.942629541718718	0.917491053399816	0.991888545014319	0.957915374700225	0.964985229274839	0.981547505805499	0.955331527898264
CHEMBL1963721	0.645274379092829	0.678125809427649	0.562814099570413	0.660642045191002	0.633305857742437	0.593379177582979	0.599496221914825	0.567983966204194	0.597617601614449	0.671605678761167	0.609022269094464	0.527706155854222	0.58767961630034	0.593077992194916	0.667379669383456
CHEMBL1964000	0.43151647320542	0.387897442507531	0.482687586451421	0.407218970456915	0.492580933136775	0.53773427862533	0.313793461466553	0.535435337906482	0.521199987215944	0.430859927557013	0.484453350628263	0.461512299186885	0.338474919660759	0.520673133549903	0.544479199539141
CHEMBL1614202	0.921251750693995	0.903436613409582	0.879298450882026	0.924579658677825	0.958102767714745	0.92754777142927	0.932166181946762	0.961037860898179	0.914243094860393	0.945116541963554	0.944164864391294	0.961760991682601	0.934348557346927	0.926019752685141	0.957779402244325
CHEMBL2028073	0.52182975310163	0.528991582466778	0.46874117449955	0.564951357780594	0.735562578969155	0.649094003919071	0.517003846877382	0.753572052244349	0.75990758842472	0.295272427934859	0.702546740853836	0.531748628213976	0.593612527509257	0.780414666580823	0.723209618926554
CHEMBL2114825	0.756667808214889	0.841589592571296	0.758778458632169	0.74904081809409	0.939754619636796	0.775070406475323	0.876169435462111	0.905960687927422	0.778762998422226	0.813828906313767	0.918112027255906	0.787331152361299	0.891419287809125	0.927718962742747	0.748643228212172
CHEMBL3215013	0.906799139158473	0.910436280815801	0.935057265564083	0.950668206077863	0.917131605874326	0.965046382463432	0.903013106753399	0.952718685065326	0.945434682646242	0.882690008674137	0.919411730606973	0.901482278793081	0.919115192945574	0.919035560856054	0.956692385107542
CHEMBL1794413	0.982701905432528	0.981713582162047	0.986638296556405	0.983589824936804	0.984333215774067	0.997836115496997	0.988688734868625	0.972167265201445	0.998607387868028	0.975087938014199	0.9860144229627	0.993968619520844	0.987597173359053	0.990917377635795	0.998503007496519
CHEMBL2114858	0.757010644413044	0.689744020765884	0.762806763191746	0.73831493449415	0.709131721199373	0.741644080352149	0.773585420573623	0.700785099446608	0.730936721620528	0.774857148638286	0.709695837359315	0.708089577909368	0.77429232014913	0.684227222741335	0.774539136287275
CHEMBL1738402	0.818689402504437	0.874259742554801	0.848912088576618	0.779242193957884	0.884353329959307	0.883577002772949	0.745258063601593	0.843432679469867	0.852437408326762	0.757710515182242	0.821544732612893	0.826414549529756	0.759060309297334	0.896647781397558	0.882838152361286
CHEMBL2114852	0.916761267234033	0.945194034537647	0.962968271603872	0.952389841635754	0.967436006859515	0.939943161328024	0.936067938549567	0.944932507842624	0.935039086124929	0.92341611772349	0.956908824218085	0.976243663810615	0.921341980938332	0.963142731147244	0.947775581634251
CHEMBL2114753	0.905217460433067	0.907562930237898	0.967165923375473	0.953943166606442	0.950515912278945	0.987220046045941	0.950186097518133	0.954974316803772	0.962031344972341	0.959648944123518	0.960448637231586	0.988671247975301	0.947663421014333	0.950583050572888	0.951763105815616
CHEMBL1246088	0.529007839688742	0.54375	0.548422642389268	0.540501888614245	0.771428571428571	0.575854100113024	0.565403938837467	0.766666666666667	0.657919738669767	0.649555272240847	0.835416666666667	0.608521429068666	0.584715296290089	0.706845238095238	0.615594345860611
CHEMBL1613884	0.828635079114685	0.855181051775535	0.78896673749531	0.898751670191934	0.878677020302631	0.820436848913605	0.901199558257871	0.875536374659472	0.791202842211225	0.892701060321967	0.891668241052891	0.806822519073559	0.896308163042182	0.871404042712269	0.77229177521967
CHEMBL1614084	0.892605785867268	0.902669932411697	0.92460517631516	0.900020199447367	0.954591618141223	0.919615022434953	0.932612586260491	0.91335093380883	0.914427386866008	0.896152475303504	0.940546343366284	0.932149897650476	0.927342523536568	0.899583805867383	0.909240750843093
CHEMBL1963717	0.791965179413594	0.810041329914414	0.707000577699451	0.77755429389118	0.872393452665142	0.665762593496357	0.787654611500303	0.736035378185831	0.700787933514309	0.714282282443083	0.81320880815079	0.688755471223615	0.797797265443493	0.827724410105842	0.697692693962106
CHEMBL1613807	0.0494165779534752	0.064450139933036	0.324557387057387	0.0906176469581447	0.0933600680317809	0.309100702765086	0.0975743102290004	0.0788812734037449	0.0824752274268056	0.0498937314501907	0.158782888071242	0.0662494812328297	0.079981706699098	0.0501103850860217	0.13281709829043
CHEMBL1964096	0.933248495460108	0.962399743853943	0.952090054313785	0.963383603697015	0.971954400146105	0.971099809203088	0.93609346675213	0.978801198502614	0.979197865910802	0.960760676326946	0.97747350288033	0.951680000359001	0.948240109149879	0.980999926914931	0.979058389666473
CHEMBL1964108	0.640019909601013	0.638253892934199	0.579714743145708	0.596008003777398	0.692003849643553	0.540861846422617	0.473202982563489	0.65119611649453	0.539856556303432	0.533555718384151	0.602416141410038	0.478439233212241	0.463588103069389	0.653667227821627	0.57182931666481
CHEMBL1963893	0.3576552653629	0.273089914666712	0.493214558430919	0.477926753203253	0.336865007764345	0.580043558165568	0.280504139160182	0.295010988907178	0.369710846389404	0.433708913972655	0.331655927503717	0.435049678653966	0.273462542253152	0.27910598820779	0.530576407228764
CHEMBL1613867	0.0155121179376351	0.0467395183889865	0.0156062971636742	0.0158680863649808	0.0304630889438569	0.0473128434065934	0.0184432399879554	0.0473017285750369	0.0203435437193119	0.0146169884423431	0.066689203789067	0.0185985131373481	0.016780753968254	0.0391209269207119	0.0325252525252525
CHEMBL2114842	0.820371614271874	0.776113060241682	0.677585017355302	0.950506885456906	0.909004400561786	0.692544689509184	0.9026151145393	0.798405409070637	0.678384002840882	0.835022807105079	0.83345254213573	0.771542169850668	0.920058848027639	0.849782620863304	0.740535850011855
CHEMBL1614069	0.353967264005437	0.460520904589833	0.479672638986158	0.424509946583955	0.576162870241754	0.488100907109372	0.466365672461285	0.635008163795307	0.536744142343298	0.451949200812417	0.638851342497478	0.467407164204574	0.479364710144361	0.600702533702082	0.52220996728589
CHEMBL3215277	0.709599179953353	0.483476843176045	0.721454354714001	0.830817877312892	0.627447903785481	0.895764475316177	0.692139667412552	0.577594771931181	0.754560122160372	0.641854933775384	0.621740089344041	0.742266296982461	0.726018236120461	0.547861046169469	0.807677828805294
CHEMBL2028074	0.794263451136092	0.59528697800424	0.770604541193915	0.804157912439499	0.568437560721228	0.790614730188107	0.70484030125267	0.6751954465639	0.84010008944556	0.743500031804891	0.621262599003732	0.867649149853344	0.743066867737122	0.682745189511024	0.878951209423801
CHEMBL1614301	0.828816218662685	0.906953482427001	0.758720151551743	0.866176865006477	0.897563285983921	0.796193365552899	0.84913340183106	0.915307638479746	0.866987967100544	0.768226796969688	0.873553778353562	0.806960405758508	0.851482545860379	0.898254940967082	0.85597180807845
CHEMBL2354289	0.633354505685287	0.688006065194259	0.726909604394555	0.786948089033521	0.752407545610387	0.798326606262615	0.754657217302804	0.737038270869131	0.77575970993512	0.687437770109722	0.749591689796037	0.808316700901988	0.754110499194139	0.7243687076453	0.758631216837083
CHEMBL3215288	0.833695084469412	0.816196863232193	0.764898670307642	0.854256924068298	0.854807062989761	0.80924575755883	0.842853662105699	0.829039623391628	0.803890416988454	0.848112905711205	0.846334551801461	0.794297117320146	0.837692032059894	0.839133265502391	0.8364818135132
CHEMBL1794494	0.943351279100228	0.947290359229078	0.941686926797769	0.876236193442478	0.900796098924938	0.935927281488509	0.956654668266421	0.932251595287533	0.973243137533969	0.925532216997591	0.967999191542167	0.966312549224074	0.940261144700997	0.923708644529009	0.978985612308241
CHEMBL2114909	0.993721544100441	0.990012855831117	0.996916904249354	0.994719688283589	0.979574336013427	0.981729350928114	0.98771070751987	0.992603563138086	0.996180288393918	0.978803502753007	0.988415590418506	0.988003778794813	0.982131344154648	0.995512146768789	0.995197152459117
CHEMBL1963805	0.825442266233915	0.677825095207012	0.682920171437537	0.846596816595622	0.739496213538051	0.587718251140869	0.758949145547938	0.61782591759015	0.601312127388126	0.857271653412055	0.684494889495946	0.61418159041383	0.694654814033304	0.664408910114528	0.645846774857413
CHEMBL1794327	0.0932319820444234	0.103603083341606	0.118520824074178	0.325181919812097	0.13375208674742	0.0760556937322747	0.111474561271402	0.0960645240658891	0.100775417912383	0.147262992844425	0.0956980278078963	0.0904213603376058	0.168017572613859	0.151679080670679	0.0843771346195507
CHEMBL1738408	0.96727284855051	0.994665283743851	0.989901512742459	0.970709610406418	0.973416615867101	0.983029967205733	0.957581290322393	0.981329468811211	0.986361471030588	0.972882807569448	0.99174780846404	0.991499286289314	0.964055889371593	0.997599828063103	0.980880563787603
CHEMBL1963947	0.979733056869428	0.949945618673014	0.976264955157626	0.992753508274846	0.980423541888108	0.990001262754285	0.993487247413189	0.988672570371629	0.981822180506958	0.984716645023815	0.987112043805998	0.992466616514275	0.995536702201756	0.981792963398526	0.977264687833485
CHEMBL1963797	0.337549562746698	0.485647025196939	0.397162463998286	0.289290674660829	0.648637722559192	0.409231827265173	0.347744971975158	0.548018003472565	0.261066145239799	0.243143765070277	0.554245899523755	0.406405029513727	0.317120325378406	0.578747560489967	0.291261640242838
CHEMBL1963770	0.526356910079875	0.256736035904821	0.437543561917062	0.480243676106598	0.349698299576112	0.261102428560317	0.413127717063822	0.364620303654945	0.403749858455372	0.357417598235259	0.257706006030337	0.2496698912137	0.409264579239829	0.23671794140371	0.345472264302647
CHEMBL1963811	0.380130833208724	0.422706950176877	0.549384344999495	0.402144034011408	0.398175000531206	0.464852145009559	0.392537188572836	0.345961557852865	0.303479349352029	0.48240173670306	0.330979176999578	0.331223705489845	0.34792251294774	0.365468261610456	0.300768678585945
CHEMBL2114725	0.480134331180524	0.423520049809409	0.540304766224457	0.568401949063678	0.448452651148151	0.466668413172714	0.499235839342842	0.493126123976168	0.534032291364083	0.477978123489534	0.505843325282945	0.534538371023519	0.476225797455099	0.413630204304268	0.507021131267929
CHEMBL3214830	0.93862348095609	0.973248443564036	0.937637246221748	0.952512509157081	0.976056883856516	0.963736798675363	0.940783343889599	0.979601529677179	0.97138846147953	0.945236256510268	0.956022585525299	0.961399482305877	0.949395375236771	0.977107873374335	0.971051456101451
CHEMBL1614359	0.661966873089662	0.54911511709322	0.557133161840718	0.737069222693356	0.726943776692938	0.654934961013762	0.686918825879668	0.605083821580462	0.661220681836588	0.715997615972671	0.674900783828544	0.596664632579551	0.689904672555056	0.628655502199693	0.598709319669812
CHEMBL2114882	0.562508579825016	0.8696754795592	0.413006419102542	0.907600427613996	0.667187071978557	0.3801829615946	0.848649580267227	0.867058008129437	0.437933797602724	0.785953709007264	0.721911553543022	0.36024269832339	0.847589440340224	0.714163588309551	0.520394872894873
CHEMBL3215025	0.947526789669351	0.958670698295471	0.976267781908568	0.97059769395732	0.965011544229191	0.979691085227727	0.97374857048852	0.939612332519773	0.96749124505405	0.94818617501906	0.93663970445934	0.972236332718437	0.96523129904326	0.962696915063294	0.969567866107214
CHEMBL1614128	0.882332735703414	0.888357072517698	0.902677545302362	0.894398263168581	0.93972214021984	0.902845600211921	0.869959783086422	0.946282278540504	0.914181301854924	0.870558042497248	0.943744821763312	0.946610325289723	0.868476868139235	0.922819743955997	0.931424956729018
CHEMBL3214992	0.902673380453168	0.83099742106265	0.906976905706146	0.952161920416668	0.858438307177664	0.926645352965919	0.920119776475959	0.862418799291386	0.896281583776792	0.925825142210374	0.846251185996396	0.890044260067462	0.922672824119018	0.856648753581024	0.897418843787069
CHEMBL1614185	0.854617131593587	0.835464576754676	0.834634782948015	0.918695352045066	0.853068640567119	0.862430040600327	0.879584759232449	0.861893398107044	0.822813103400125	0.890677012288672	0.858759028919674	0.853480265205836	0.902425922409047	0.888908419284415	0.812684672437983
CHEMBL2028075	0.83572018966087	0.793025004635329	0.863909754805704	0.789695096493616	0.783284893005581	0.833255377741942	0.770546015820062	0.817690789074105	0.900423053205869	0.779035538856093	0.750707688683236	0.900397970000195	0.741905117286166	0.843274387032013	0.897344302275142
CHEMBL1963789	0.662214857401342	0.563313930757153	0.687730950421656	0.75776168847165	0.575916318642302	0.602120808686376	0.676549445000566	0.486073022302097	0.513160362022729	0.702400054112736	0.545421223811535	0.541935975580638	0.693739682585763	0.577574917792654	0.489428122618867
CHEMBL1217000	0.889520791319027	0.874430785282863	0.766506216950246	0.859991389359466	0.68663087675086	0.82123529503269	0.825518404814046	0.755363788644988	0.781779518680029	0.760105669842194	0.569449982357128	0.676357881349729	0.842588074633695	0.727046233275591	0.811755323486533
CHEMBL1963971	0.862586826194257	0.919483684227907	0.940146168366947	0.905382757234763	0.885810649531953	0.937507705470354	0.888193053407868	0.878105148592164	0.952636384816925	0.897390627510828	0.901064433997035	0.946709254401613	0.858755368177255	0.877511592947356	0.963994278470078
CHEMBL1738673	0.901550321144455	0.894502509884638	0.906342553963411	0.905395318627688	0.911530856358254	0.906542979577662	0.913423447614998	0.871825688542427	0.925189526485269	0.901619140689028	0.908573133303727	0.900705840102488	0.910879173148945	0.8867244991401	0.938440839334065
CHEMBL1614336	0.743938112210426	0.76052984007343	0.631773844646239	0.840664030099476	0.842751329364218	0.876395166817384	0.80154910848632	0.796074145782679	0.755144643808844	0.798795957643367	0.776961641992452	0.838889275124572	0.832240972288604	0.802736979288677	0.800071536630045
CHEMBL2114872	0.910520857119963	0.931706862743832	0.913116741633302	0.968268435321314	0.943130476053465	0.953931684906016	0.957261026180492	0.932581722326481	0.956439197574309	0.967229351481473	0.950330035521747	0.962745572357898	0.968484388791584	0.91942908642876	0.955018213376539
CHEMBL1614276	0.546015698271454	0.653482756917461	0.530742964036112	0.620475398648028	0.612782964764577	0.593610464171592	0.54379701113004	0.616693481938533	0.573501253113077	0.622412928218671	0.576931181290344	0.577241295992075	0.559887310188293	0.577923080347582	0.587243308265845
CHEMBL2028077	0.0843933521259103	0.0941847767580427	0.228333333333333	0.126129888629889	0.404242511520737	0.118048128342246	0.480699855699856	0.201029029793736	0.0956247456247456	0.0367884186469845	0.467615956292427	0.0423945521506497	0.0955667789001122	0.511329910808479	0.0724501424501424
CHEMBL1963752	0.877728074875437	0.65024209839591	0.560631222042078	0.885174402910219	0.718189837586603	0.714152654382414	0.8406366070175	0.631606382720216	0.688909228296157	0.848334721180053	0.683637831445434	0.666261458663745	0.810652880937051	0.636803732729055	0.725358110902887
CHEMBL1614098	0.0136283783783784	0.0316706455869254	0.0552397445098306	0.013174244056597	0.0466861627876045	0.0400032797172122	0.043315811172954	0.0619162359349097	0.0728433163073023	0.510321537290715	0.0275919558692563	0.043201147605464	0.0576015254586683	0.107847299097013	0.0415197496702315
CHEMBL1963686	0.735588989287585	0.607680911658926	0.571346670794421	0.690838206519851	0.687984511804703	0.663924031654622	0.705911023345649	0.622018906538027	0.556795304283975	0.69019541590566	0.654979495823209	0.601565217242181	0.706763117278982	0.745172393196427	0.581669541592723
CHEMBL1963716	0.282384112158845	0.178045707652463	0.132127943142075	0.412809813085691	0.329730201815507	0.170733419339692	0.445523608580251	0.238764957002454	0.276428666795957	0.324648847866861	0.274294758922919	0.201206845338466	0.375533908695433	0.301877356492102	0.218675767530832
CHEMBL1794396	0.963579270821316	0.970697113560986	0.941550417542253	0.97484052787235	0.966970618945534	0.940792501805868	0.955951023454152	0.983304327738788	0.966780198332948	0.959652528266413	0.956421830327498	0.940457402062483	0.972854719397764	0.977671886782701	0.940547248266905
CHEMBL2028076	0.685657849095349	0.537901201743743	0.460157657657658	0.609698128204226	0.728626832918514	0.495746081871612	0.548758917493797	0.764276603449944	0.725868332294665	0.497591151609874	0.639684621057758	0.380729636747515	0.401543653598833	0.750175573980536	0.798249036436892
CHEMBL1963702	0.541568257645644	0.582712657532792	0.408877357316782	0.608831292559345	0.713828870624131	0.358424814093726	0.497756219149097	0.538456976874598	0.450106751953034	0.623216822880218	0.781341382670286	0.497598905648094	0.484090197228318	0.689021724179182	0.481974608902567
CHEMBL1963916	0.583226081771141	0.72726236030703	0.561068399876926	0.592757889546449	0.705228862705906	0.638498358543428	0.555119559227393	0.711349680778396	0.591268429263321	0.548369835930814	0.692667873327622	0.601708459321184	0.560127096715174	0.759560039595585	0.612562787054091
CHEMBL1614304	0.474719993061415	0.615280485881452	0.67210908679728	0.666584251384303	0.857222575583164	0.791681242205075	0.651947707460246	0.788766213345118	0.690563807188627	0.650981592932295	0.780166118751078	0.748522114955119	0.634529418142017	0.810964780381334	0.662971387546483
CHEMBL3215157	0.966169013589929	0.957215241310014	0.953258041935444	0.986714766926054	0.966200035976802	0.971431433680151	0.984129732665854	0.963340748417741	0.967434437868404	0.970374792918925	0.962133977657642	0.970475806754194	0.966000136326211	0.969336668717417	0.972382533052906
CHEMBL1614466	0.950087396329786	0.884380753007629	0.956133436818866	0.944913252133429	0.932904590713989	0.931582368679701	0.957730861877594	0.91316464195205	0.938311644723481	0.955734432219776	0.953836264879072	0.943970804687668	0.955937079432708	0.919615162708642	0.943018534610336
CHEMBL1794336	0.663435288259353	0.475783344927213	0.635424124985907	0.750006321388411	0.674550757257665	0.777359237056755	0.688866593825331	0.613794965618435	0.674014885713874	0.702233950144545	0.677337490919867	0.693912305923833	0.6908595043074	0.658268179832739	0.615920153633622
CHEMBL2114865	0.969581464651968	0.957407174135045	0.981129548885947	0.968587398141486	0.96241098387054	0.973020376543144	0.962737620959599	0.964456735625263	0.973081527805227	0.979851800567644	0.950830976763312	0.961389442674513	0.950859119114592	0.976068028607192	0.98576617900987
CHEMBL1737961	0.579011212076525	0.153738170089928	0.704497419611109	0.482752108354349	0.496302962644111	0.751032208793154	0.488832601007722	0.334135182043432	0.665282442654149	0.494833805472422	0.458562534998503	0.725846115052148	0.454172971599851	0.242544005029717	0.744644366515507
CHEMBL1963695	0.656791955287742	0.737597573342299	0.557881213738445	0.664131750500966	0.743668091645779	0.656834925280335	0.655266353484924	0.689011739845075	0.679340856026338	0.74685409558771	0.792179864373947	0.672511973017835	0.632303318070824	0.762336017727217	0.701687946557138
CHEMBL1246087	0.773217162568816	0.643799603174603	0.615858368373949	0.825440581184808	0.871924603174603	0.71851618543655	0.803895244020441	0.859573412698413	0.817003400685959	0.860942629075293	0.887698412698413	0.737982264468381	0.831488636511071	0.816684704184704	0.772266299393078
CHEMBL1794467	0.928109506147918	0.956556949918025	0.927200492337495	0.975336545712086	0.950894403743755	0.950597041001096	0.953267562117746	0.975959938059739	0.899334914757445	0.95986453598022	0.940000377631694	0.939461593068997	0.952536973854251	0.970431076174411	0.911834470792502
CHEMBL1614547	0.371909917447258	0.453796346111366	0.524874284322092	0.390599937242301	0.503563040784828	0.526174566544646	0.341535198245947	0.412181733828532	0.609517686008646	0.384055029478278	0.470370255014083	0.507378933099767	0.363310075078111	0.41425169101024	0.544443841633217
CHEMBL1963764	0.682324115437448	0.692108676511376	0.611722284683515	0.729104929851567	0.71426882121758	0.666384996811104	0.638372303474661	0.698029638297651	0.587954592417767	0.731537382735319	0.683451335988444	0.624026466470195	0.695015752141359	0.689877225992541	0.626841877928201
CHEMBL1794499	0.544226340909479	0.508803546798381	0.639502201058539	0.664460244138025	0.682405042891283	0.655934739576001	0.532788820881423	0.64121266659086	0.559629046652188	0.631755721820697	0.581325641450162	0.664074408569202	0.553647634247422	0.647442276259884	0.603409797790105
CHEMBL2095143	0.132734063322299	0.0503257583884625	0.194408840514211	0.54053369371464	0.199975248328907	0.0906152360615371	0.736587615283267	0.0858903979606979	0.221728067284665	0.141252486170816	0.10101392729768	0.094973732348396	0.779624624624625	0.137254669634971	0.210986801710689
CHEMBL2114816	0.649730051273968	0.63990522058894	0.602495095674191	0.713266822394472	0.728776106246368	0.640042522262017	0.657214446845908	0.743902299714821	0.620096113206805	0.660301674026677	0.72989675646647	0.629692668411442	0.660706609261039	0.714656942589215	0.644428200085787
CHEMBL1863510	1	1	0.999981606531712	1	0.999851014276422	0.999990775354547	1	1	0.999981522627851	1	0.999919489898652	1	1	0.999959966949592	0.999877839074063
CHEMBL1614199	0.591165418547271	0.542891426443066	0.647442938817524	0.638103910120748	0.507238191248793	0.657569541799778	0.601238257213426	0.48183865181317	0.608676009946579	0.647618348410962	0.470984424345833	0.682659489864063	0.593248979467369	0.531654743501132	0.628423939335493
CHEMBL1963825	0.720247368120345	0.768323990743309	0.598023742914222	0.767679583933174	0.806816931389519	0.626803850361117	0.665703121306595	0.697570061862765	0.511359566706606	0.738824505521653	0.757773452851808	0.506046352894233	0.705048708719237	0.744669214245114	0.518323020560396
CHEMBL3215227	0.648265523178474	0.679102727718934	0.656105616834558	0.665789046929197	0.755761843872115	0.752733691068107	0.646888047141773	0.730887915717709	0.757311198373801	0.622771914445279	0.704705475911362	0.715339947148584	0.687824435934097	0.732173814485688	0.76148023840964
CHEMBL1738510	0.717137809824347	0.69239575284985	0.774615959081052	0.739279987123062	0.811817510195742	0.80914546311364	0.635643489790163	0.737049551493473	0.819991628798609	0.67971142086538	0.76207781325812	0.750797177952729	0.64712279909297	0.716385844757039	0.816819872899808
CHEMBL1963711	0.466788014438849	0.219762469041009	0.332897249809015	0.373549680586208	0.570923786553649	0.154680932746329	0.509724170172978	0.392780153460229	0.515924313282804	0.623351943861797	0.437305428912184	0.107295437488301	0.501171171171171	0.435924581811168	0.365833664977831
CHEMBL3214906	0.511914703300111	0.448171067697937	0.514008046904492	0.675340937746382	0.528592195100309	0.580142749598635	0.596487621118445	0.489561668708303	0.559181428899496	0.663881111233608	0.54893779029164	0.564258157579431	0.601613532287943	0.471283230340543	0.565608383181986
CHEMBL1613997	0.936152349941332	0.957823148506248	0.93484959488222	0.976929158886422	0.970400156524348	0.960808770735481	0.948238219005961	0.956610667442569	0.926327415302299	0.925667515567653	0.972175043994663	0.941286677891516	0.959977680660337	0.968777152561057	0.95068628201692
CHEMBL1963743	0.565369126141885	0.555848480161729	0.481756998467115	0.573714910976116	0.597842946158983	0.491632398164183	0.61911420760413	0.484132751222696	0.446161063028125	0.588291074910503	0.463371240795382	0.522767373537143	0.613158850528644	0.590176206413631	0.426251693477795
CHEMBL1119333	0.997210325756862	0.994985868223539	0.995483630961233	0.999785304147234	0.986512917991089	0.991365141392373	0.998711641773936	0.987522554142432	0.997149445327518	0.999156309415653	0.984498450973933	0.97331761586577	0.999567427268651	0.987401702161775	0.995951999777296
CHEMBL1963815	0.529670359650967	0.477341255273367	0.397064570536561	0.655175933476721	0.552732841068477	0.509325877272554	0.604499778123929	0.514863336668557	0.622745096381494	0.637851397567148	0.463221469148727	0.414990014297392	0.572184525909076	0.556652349654901	0.649184925881867
CHEMBL1964118	0.76107867084288	0.7053374132661	0.581233524059589	0.852242116312147	0.739597100151249	0.6327982574692	0.711751291966334	0.669503177538962	0.711232761624331	0.799388883124642	0.662636460788173	0.675559836727694	0.794700257355487	0.69773142579534	0.756962201543997
CHEMBL1738183	0.439569181360105	0.50536354430866	0.53381809840658	0.55136606099949	0.677279420793619	0.620656956792475	0.576353496935587	0.592014450540181	0.674960899829404	0.585985501417779	0.578355387176155	0.542576666539711	0.556781569764905	0.539752356113372	0.647088674494066
CHEMBL1963824	0.845576856909459	0.836166055144283	0.806627980823841	0.816946918162518	0.858544180830952	0.867593376246436	0.820352148002446	0.874382673240556	0.820302116107694	0.864117085544207	0.888504409394168	0.824880156076689	0.872662426525631	0.811714065545895	0.821502466277755
CHEMBL2114821	0.908385390167776	0.847441859385683	0.896008896253874	0.89433959249184	0.899451639977969	0.913583192519371	0.883909109425329	0.889296499865245	0.837874017796839	0.929308278460864	0.887661776466228	0.884624879757958	0.883214755532136	0.861653632898737	0.848719627004536
CHEMBL1738593	0.923923830133478	0.961173019255381	0.915631272898942	0.940681456936747	0.976055515088841	0.956775853956981	0.962793370200856	0.980939273697641	0.936079848666823	0.931956884354796	0.964486838283403	0.958979912290279	0.9546389468811	0.973942249663412	0.940514926739621
CHEMBL1964114	0.892745697663722	0.651855071680798	0.645040295344242	0.918503148662532	0.678881579067372	0.771647749940956	0.900373770731677	0.588659543886639	0.68144263939913	0.838852690164595	0.617095342334571	0.726253818755456	0.874843066847123	0.61366264976286	0.719673477583987
CHEMBL1613929	0.253919053530544	0.216132408858423	0.238411603853222	0.452165852485092	0.26122286943815	0.262696106742936	0.373860377225842	0.292589310375111	0.405943639688739	0.52275432557683	0.221360396088157	0.257784749517947	0.45570684729282	0.240450964304426	0.315075061904877
CHEMBL1963786	0.826475120873428	0.716116265528443	0.670942533531192	0.831286752925938	0.761337391989596	0.698150751533217	0.8370396249093	0.697699054653645	0.719008166316842	0.785175136001906	0.729231580803718	0.659770945370679	0.82182067303704	0.749088123823097	0.729218900458053
CHEMBL1963751	0.644234572807495	0.580291377394728	0.336323804543727	0.575041190661073	0.544556347377996	0.481126912927485	0.525156065029571	0.534537389050434	0.457144529207772	0.561401010796214	0.547899791534662	0.4649609256056	0.499108543985332	0.56561338719408	0.431162475428521
CHEMBL1963753	0.363888257439253	0.305220740541384	0.334308236135775	0.341320064648958	0.564057759170355	0.31937744385098	0.388823023623893	0.513478675849761	0.271958150587568	0.256548636310712	0.347914622496598	0.274101512474098	0.457910041726254	0.462718747415324	0.420106062482406
CHEMBL1963766	0.534328215064876	0.435226523689995	0.380350999260171	0.436305559926946	0.570889136330051	0.570379963226815	0.51460065701384	0.448234086028458	0.554035737658762	0.515748597886011	0.485240831343959	0.415470438648875	0.487944798430222	0.430141799430765	0.462436317724278
CHEMBL1738242	0.896991475878484	0.842556539070789	0.936992482233532	0.924729832905394	0.901106479076558	0.928313683495437	0.908410920330772	0.863931145527669	0.927515785156738	0.93097053933749	0.858779029233013	0.937214963661867	0.928742910832988	0.871275504934677	0.936743808655451
CHEMBL1963798	0.193315182755175	0.423933577822862	0.177009158340067	0.225958410823858	0.350893717949183	0.159040932524544	0.233080041973983	0.367870516198915	0.113937082714853	0.131978971649592	0.293068014383859	0.0746800124452171	0.18563400612768	0.423804371594963	0.240852500023916
CHEMBL1794528	0.74216918361193	0.438194550003266	0.542694440215069	0.801182100290858	0.694644248560873	0.676183889469943	0.742224316162309	0.5996038121351	0.599891019244854	0.830503491763051	0.632082926043823	0.664001095250496	0.735566388365751	0.60341339786209	0.655348559239066
CHEMBL1738391	0.44239124108886	0.474726678128828	0.423575643641258	0.638644487498985	0.526678307196409	0.457700395923338	0.462386817217017	0.485593760091367	0.468105542978721	0.491861149834971	0.51582907255249	0.465084202514498	0.48461777478027	0.540724835981679	0.492138480588248
CHEMBL1963804	0.575729925862002	0.694248612667927	0.45622935871584	0.609059144206422	0.736631860523528	0.571576954311401	0.528672975117333	0.664828612923879	0.598320373397715	0.560781393834906	0.630676188063524	0.548211297693891	0.537761335345314	0.654172786656406	0.641962876192241
CHEMBL1963760	0.588625842375719	0.369138058082688	0.300320821300348	0.316876909104478	0.484554192189874	0.600058759186614	0.333269930377536	0.402032320192251	0.411867518173392	0.341898117480544	0.387135090957745	0.486443048017853	0.351356141067538	0.476030500809313	0.551424063728224
CHEMBL1963734	0.661065109561171	0.341407264572786	0.487329423679513	0.810821810865724	0.39032697806266	0.457945485553261	0.633725537869514	0.303183938870038	0.5064967176536	0.758467361302416	0.405242447387507	0.403733545646737	0.585367378001417	0.299646693942384	0.490242643351963
CHEMBL1963773	0.64358290966745	0.741786607263867	0.633158287845969	0.62724022333128	0.766752962723785	0.593077189285541	0.637266588951504	0.709291276306589	0.51382288464566	0.630966013845993	0.736480442610815	0.574945509743125	0.64058536897591	0.717418885539945	0.50882351028397
CHEMBL1963820	0.296841849997777	0.50160362175307	0.526717516132753	0.303227172099918	0.510743875413647	0.463552204036407	0.249491990093622	0.51002863700706	0.520350862214715	0.378947788793422	0.557586970248167	0.549923558552409	0.353549125734835	0.483486237204462	0.534075898388188
CHEMBL1963738	0.593922835021876	0.620121319239804	0.647456301935071	0.621814270006921	0.684354743225148	0.613424874953106	0.582258775431231	0.577999281407303	0.645780807619555	0.570887593017441	0.608298596122674	0.602708254316752	0.606056002651026	0.585995169970484	0.638830857600158
CHEMBL1614433	0.354942815936084	0.638204800618436	0.463755491360285	0.630068230902318	0.677745732827742	0.375220025956189	0.55041673848905	0.645775796287308	0.459908254610223	0.570580144777383	0.648883573487602	0.381317145723361	0.617092334973419	0.534255410530452	0.362288753765117
CHEMBL1964081	0.880857530879487	0.744505739501802	0.780432093045329	0.853542463051614	0.812576055602577	0.843518326894813	0.858129086188795	0.726548637357547	0.822116916425705	0.827993309809516	0.764054189199559	0.794290616837843	0.861488914881396	0.776991398640081	0.849462918494023
CHEMBL1963787	0.537098350518487	0.690747388183591	0.619635738670394	0.553672013546419	0.672829831338109	0.624582788824107	0.553097336263166	0.654581384281851	0.574580205798747	0.496013371442862	0.570966896918904	0.592534830326327	0.602135711222578	0.694491218600487	0.64335643674678
CHEMBL1794531	0.098422976156372	0.0593088510995348	0.105997062052543	0.108690385328986	0.0642893857543925	0.114133416293043	0.0938699705981832	0.0483506535077397	0.11869974082688	0.0718508538633027	0.0576727120559014	0.147216899945891	0.08703597427251	0.0473670888103761	0.0963617863434349
CHEMBL1614030	0.828468361115904	0.908982531648532	0.839747005377722	0.917073132779746	0.908612481365895	0.8642173018372	0.853642179634601	0.90348994411846	0.876190713999797	0.906493884271664	0.91319852699588	0.901013395385431	0.877858199385662	0.896149345419822	0.868586184164398
CHEMBL1963821	0.477372399092377	0.430273617741973	0.402431676140505	0.48912288706229	0.473755103817652	0.538959479690747	0.424983154973659	0.504395507527292	0.417930373984502	0.434825245988786	0.491310287558964	0.500366706664295	0.419866758095155	0.532106479749273	0.417001745967134
CHEMBL1738513	0.855780765954216	0.774839800991403	0.708445320194999	0.885275015538751	0.808894830798936	0.737579419327999	0.839913896629825	0.722389048059938	0.664153378821486	0.845677399089964	0.784484540860897	0.733356544150082	0.82812280939846	0.783916063187917	0.729826901953605
CHEMBL1738131	0.466677870981276	0.55852134983661	0.520660804994565	0.633012512827436	0.634160373592188	0.713090186128258	0.526926866415372	0.471552951868451	0.704853264910462	0.621898903671766	0.637074684247944	0.597080920586671	0.481129715363867	0.556669824213808	0.692267312433885
CHEMBL1614504	0.841021528856369	0.942055338811896	0.884554524038714	0.892781707197586	0.967935389179337	0.944322456646581	0.887957871883076	0.945728843794529	0.936471604614497	0.858210938460454	0.932431731643638	0.935097664856915	0.85272513224687	0.940927041682896	0.935353690079132
CHEMBL3214993	0.801141111756485	0.759454187529944	0.836065194698437	0.881779447646266	0.813576839466801	0.880516027893961	0.836722925466329	0.806198430339898	0.830916244553047	0.88973993663344	0.782430080255509	0.841341604585182	0.839390108854021	0.807498333580972	0.864717927325553
CHEMBL1963747	0.594673217509693	0.395362466836717	0.388724006581413	0.597611608277124	0.56810392324363	0.572600181303943	0.610529220432584	0.597104306261957	0.584117553732952	0.746591531360713	0.533287163777534	0.544842427389445	0.560456766344327	0.546949351155891	0.576320241899873
CHEMBL1794350	0.984977996907348	0.975535604077476	0.975046440496414	0.986433985732388	0.969249551850364	0.982307296810674	0.978848110916788	0.973108838863651	0.971281696290293	0.984913213003111	0.971183569697158	0.984863185125504	0.977030279958898	0.977250208016074	0.974885784679643
CHEMBL1963712	0.52373610638663	0.401067438171149	0.506944710213963	0.532931660974869	0.538226303219475	0.595760669468581	0.443633608030274	0.460935703492862	0.634610018627166	0.525258778587266	0.478645819936484	0.545930500505712	0.472949324416001	0.559219721399972	0.654803873767363
CHEMBL1909089	0.502822135693471	0.701578097992454	0.677028715070361	0.635600446015646	0.632251431055776	0.730861782538746	0.510348368989087	0.692304866570503	0.715569063352627	0.611863522760843	0.646788121099144	0.688512445115848	0.579465363305987	0.645919304529313	0.722709374271199
CHEMBL1963705	0.822772992424384	0.572491882853295	0.663792848487913	0.795520451374328	0.613954871837441	0.634456118006634	0.782069307256169	0.57738930142583	0.669612646346202	0.761006051330661	0.578277815725393	0.578410914822914	0.792135285175675	0.627549990734545	0.698168155612767
CHEMBL1738249	0.112522553320604	0.147362960656838	0.231268999484786	0.126464299728829	0.136179212042696	0.157810484337999	0.0925550548570808	0.121400237313371	0.125970766536771	0.155484260530497	0.159281416474376	0.235880831655055	0.0895647609783887	0.124979254182504	0.153430541230047
CHEMBL1963796	0.532575158137676	0.44337064861975	0.389867525784378	0.483299239166952	0.6393144282468	0.513325170095296	0.479166986964859	0.507278614735384	0.484344259693881	0.447535086066358	0.588479703174456	0.558884933914262	0.536744339578104	0.607269447199092	0.473759094201516
CHEMBL1614170	0.411191371642764	0.41506514291956	0.401312219202418	0.572612306231783	0.543513499249456	0.466928498444369	0.492092818871475	0.426346957562343	0.454793040926116	0.565460000734793	0.460519742035434	0.407516438671368	0.554802465156076	0.427460971929103	0.441552758530549
CHEMBL1794383	0.972661141983844	0.916893774839477	0.961174497849563	0.99025759734551	0.937339702863564	0.977345332039507	0.976320936367197	0.937505762439503	0.983720143197155	0.985536766476704	0.933086158126276	0.966623151635378	0.978073486311098	0.95128962892187	0.97318455289962
CHEMBL1963731	0.803206492227805	0.88711467347969	0.643415930547232	0.878729618818281	0.931140448375837	0.750005624349436	0.837511302126736	0.856029776120102	0.678023314850979	0.831021632430391	0.886202231807945	0.695959287334774	0.850664773534779	0.897640671671383	0.73260472358672
CHEMBL1963819	0.702418761169465	0.686996015570076	0.695221436314246	0.728136882995559	0.765902118444694	0.79714861534788	0.731922622951599	0.715392511900625	0.673034661306369	0.733021813186281	0.749673005832734	0.751883162626706	0.735005770394667	0.726208984429047	0.737803166099225
CHEMBL1863512	0.996715100111235	0.999657834134502	0.999369822286299	0.996715100111235	1	0.999625000232891	0.998830757035275	0.999982674907792	0.998994317447898	1	0.999982674907792	0.998611646564793	1	0.999841418019574	0.999431918605837
CHEMBL3214970	0.980974946672392	0.979450493153546	0.98815370971241	0.987284855187607	0.976783848397428	0.981581501087826	0.977459005710503	0.97276538799739	0.978325062714678	0.978448214395736	0.965657135711815	0.975042160966094	0.981826685174792	0.98096197277741	0.980853524896222
CHEMBL3214971	0.82427428048177	0.830785116131319	0.808203809277478	0.786341480738828	0.857534565902123	0.771359001462294	0.765862883208954	0.796650041276335	0.711122169907534	0.711410938252552	0.796178515575758	0.751470426832954	0.774049288618917	0.823958940837172	0.737026237628386
CHEMBL1738414	0.989349320042326	0.985108650822488	0.965289774734281	0.962827199816813	0.985496489810169	0.952034246713847	0.936063744389493	0.968922986191133	0.925353870163406	0.968887874877666	0.980725915853045	0.933981928077979	0.945135096580813	0.982985775033933	0.925764945586731
CHEMBL1963802	0.623754868520257	0.645686540458843	0.549255435782406	0.630410561488497	0.711875948568808	0.633814470643686	0.615883337110337	0.678460487593021	0.550038670871924	0.622326023940387	0.642227885351315	0.590306544023292	0.619376325594306	0.674784466769451	0.554262790007366
CHEMBL1964100	0.426638048576932	0.423398005297483	0.261411965459287	0.373338691426226	0.485989188514505	0.288006697953764	0.330155595629793	0.44613287732979	0.351408890766993	0.318412170166387	0.418675710820503	0.268291336765904	0.31800725471882	0.514649976630206	0.438177030201761
CHEMBL1963780	0.358389595730431	0.315271869752703	0.231454504229826	0.411999289850256	0.428633878564856	0.556148591188721	0.366616716937412	0.355395597152429	0.554517470420171	0.376968236641093	0.466505918521231	0.294772232559018	0.316277006734298	0.310545505950131	0.540416039656344
CHEMBL1963795	0.693650710393334	0.787263965541133	0.563874556607202	0.736968030349843	0.862461325669713	0.652592080074085	0.700104807509575	0.777030186827485	0.600071997594701	0.762056936386435	0.791248691369279	0.625707036221197	0.721567045624823	0.806719731285432	0.613579491227256
CHEMBL1737865	0.464360508655245	0.409629611425849	0.507809477090179	0.570407748414215	0.352392247115905	0.544092237032314	0.551358480537315	0.43939682000909	0.49380983027754	0.535999421201858	0.386964605757758	0.438306565720159	0.552720380502022	0.468933349654237	0.474813668227125
CHEMBL1963696	0.349268633891874	0.381225814674342	0.365207494351893	0.41118179153903	0.56358100127559	0.51894649001791	0.387779781712707	0.365745301218882	0.520367121735387	0.365201067060665	0.392926978029833	0.475441558872299	0.378632163316319	0.417821939924299	0.545814916163385
CHEMBL1963822	0.355789566341476	0.218298391054216	0.179175894813514	0.351128663946298	0.317647690320427	0.275328720155196	0.444968339915969	0.360634625812605	0.262539765093954	0.296008466929303	0.167841670567027	0.324206457317622	0.405754165257448	0.263715949422135	0.209362391263952
CHEMBL1963801	0.711667611232007	0.655484439570452	0.529411374202003	0.496750927327572	0.618541444970393	0.523154333214046	0.476752646011062	0.596576758845675	0.490835997600152	0.389422671560108	0.567755076009829	0.438391028683333	0.477825342131583	0.638585393497086	0.476351735457768
CHEMBL1963818	0.858543872433331	0.793066277675243	0.659398786679455	0.853658956714793	0.701126604035003	0.616202690057541	0.852764383353182	0.685831393664312	0.627158444755274	0.806455926936757	0.691179631435952	0.55254108282163	0.85739398881869	0.715127413967766	0.621710885809322
CHEMBL1964116	0.636229361999549	0.519448475544144	0.505100597442052	0.539872887730311	0.563094689679648	0.550964459346137	0.488294481093937	0.537611852000979	0.483611285777333	0.49551784753624	0.511691609953964	0.593582106523012	0.465438424544098	0.572138345595733	0.462715861183434
CHEMBL1963754	0.761060889770091	0.823087819027543	0.65855832200082	0.681821595387805	0.831999287704686	0.542996087794407	0.700618169782381	0.696183015265425	0.454893832806106	0.674045854093533	0.800880462462454	0.535346881519963	0.703591860560746	0.785627507785497	0.477843818997243
CHEMBL1738424	0.685885281991049	0.700064207522689	0.599592297887868	0.900514746662297	0.867168250742306	0.917639203728367	0.888747636261024	0.748751435134935	0.855287832601469	0.83507407720853	0.828014230222201	0.855360866931003	0.894201722903545	0.798060071227862	0.886796160960397
CHEMBL3215192	0.849208007193997	0.847476445052698	0.789890167848038	0.898700731795525	0.874826525169993	0.802511471842706	0.912177046450885	0.836388208775174	0.768333331557518	0.856587747724735	0.784798830396952	0.725132723383668	0.907446477500249	0.845317862303592	0.788371520330604
CHEMBL1963720	0.60090841308438	0.443646754562507	0.588320606356253	0.578711752140312	0.496534400419544	0.61787538986987	0.506883492205983	0.481982153737947	0.436190796367654	0.503788900403329	0.514003029310409	0.581502686594377	0.496082442063886	0.502187882980738	0.467832590449458
CHEMBL1963728	0.285192893532495	0.289302815142833	0.172752675262404	0.476485161330419	0.567375055454012	0.321156942183494	0.411986415469601	0.236568895669154	0.231393044105746	0.434771096342131	0.545994736586439	0.276510343608185	0.432959648751839	0.311516335085501	0.276128513678078
CHEMBL1614171	0.170698241905889	0.186427250283276	0.118857045355884	0.251239176691504	0.230323463187768	0.328430733498502	0.260836541117149	0.156609171277981	0.166432491165494	0.151035243069011	0.253285881986821	0.221671757561717	0.148534422790441	0.164968326561999	0.16939406091359
CHEMBL1963765	0.443638013111761	0.407141049414371	0.380148073214505	0.477722864145763	0.411667031461474	0.534407052218199	0.530340423292011	0.422117216151084	0.438257412951458	0.398538467012653	0.369389881668294	0.445915944168254	0.525604745454025	0.463351353606514	0.458293106993708
CHEMBL1963710	0.612367306060366	0.669287248662411	0.604106197654649	0.598736243306265	0.723492076362444	0.673123898661138	0.624802298788689	0.662143233574912	0.665985992816307	0.537398466777117	0.668619503863605	0.626193926386038	0.630109056579978	0.715984515091283	0.710560369110983
CHEMBL1963834	0.739425921800102	0.571468378094571	0.52283822817676	0.712918868108273	0.674777790927695	0.732859930931978	0.725257916131265	0.629387094477482	0.621000653223294	0.660636587927531	0.597157902165331	0.602693571683985	0.709170280521171	0.635136932159149	0.679608630029758
CHEMBL1963697	0.583031830473159	0.580135823433672	0.438910764518198	0.6421655116237	0.628300759175333	0.575304865273891	0.512969934830455	0.491404044534579	0.501381371375846	0.555756996973972	0.564010066859562	0.536881567035902	0.519869305693838	0.630324013804076	0.489123828025902
CHEMBL3214929	0.827303594076402	0.665352796920443	0.797966473485219	0.842348245864873	0.668232925543669	0.820054634590036	0.821096361143173	0.748572816807375	0.807031914429408	0.837405391844909	0.610566632468055	0.816901678680559	0.84982906232696	0.655525456593952	0.799599161585708
CHEMBL1963791	0.761277753625371	0.516784055559609	0.489459498943392	0.692986694848491	0.563817235172366	0.431996505567945	0.652029751519701	0.428687099084917	0.478955330840782	0.711921793081916	0.49843552295946	0.502760130052714	0.63827177383066	0.515511981794067	0.495861362783007
CHEMBL1963729	0.236257063577062	0.336097395145878	0.368034284904394	0.27201190713175	0.422154678945316	0.284372572134102	0.229237440796027	0.301239928737588	0.274194061194954	0.263036663477195	0.340736641793164	0.335618246232165	0.209337112071494	0.290530475665926	0.320997436561971
CHEMBL1963733	0.506565109815816	0.592351829320483	0.415337543703546	0.636908063427524	0.631049180146849	0.412391579968048	0.464484622780922	0.449725500431624	0.427171530759572	0.543554228366213	0.469858792229348	0.30850903457729	0.439983145115758	0.505259695223113	0.471066358431995
CHEMBL1737860	0.981914381054046	0.954369253588659	0.943389186850151	0.992234232279206	0.968282218363491	0.949906246820105	0.992868090371667	0.970067589919082	0.954521756934612	0.991819048800796	0.969831009609414	0.941968312223634	0.987670916022373	0.974051501202613	0.952710943292742
CHEMBL1963763	0.556790543321835	0.347259031063942	0.443131751926533	0.612192381880744	0.509333402299996	0.692656721523494	0.647810674459938	0.373444985540553	0.697329564329468	0.597790396027896	0.452173684597694	0.556538872678962	0.637334027426994	0.394438876753388	0.755482158972883
CHEMBL1963688	0.657014906781716	0.540050299959022	0.517594743653069	0.76310927301668	0.573014321113139	0.525878454264907	0.703247848507377	0.559512906726979	0.527888130103989	0.718980683314598	0.539405772441994	0.48271033891276	0.700552951302333	0.601311037699666	0.534306094180394
CHEMBL1964022	0.170351210850809	0.254581554337128	0.263583810370179	0.238074871807944	0.252126811052547	0.267988184518665	0.18388389919815	0.268394348490543	0.289666332338678	0.196177375064102	0.213307208744939	0.323323281798033	0.177332574381929	0.274684860309722	0.290382918262475
CHEMBL2114926	0.70908202094524	0.713925756945104	0.771127583995884	0.821463440988927	0.761931750376619	0.816211500592108	0.801121474140665	0.714657889239468	0.803292203808632	0.773028019919151	0.707534496917588	0.83053307485613	0.797777887089414	0.738977620406316	0.795638463291017
CHEMBL1963793	0.620663842754132	0.604414526150488	0.598115109190456	0.65456663865928	0.698019638138804	0.659795805895555	0.629309676978859	0.675963639770401	0.584340286415337	0.6218137402085	0.727692235709718	0.602615906761399	0.606997770451222	0.677023470836173	0.576590696723797
CHEMBL1963708	0.726671515018954	0.784433626377166	0.623711043563585	0.773427337170937	0.792882477598133	0.699105479310317	0.760098624836413	0.793682146151756	0.685963771610427	0.758361112121479	0.79253050453413	0.674293207717919	0.76285928783047	0.801340575345851	0.671147000390717
CHEMBL1738494	0.256291670205058	0.186259097295322	0.00413223140495868	0.479430417082674	0.372708538256986	0.0040650406504065	0.174440766672666	0.294794596751602	0.00393700787401575	0.350406660258068	0.407921876121426	0.00543478260869565	0.227405864953296	0.141525400799959	0.00694444444444444
CHEMBL1963737	0.579705850237611	0.419662293114056	0.38200140116676	0.383531654386727	0.379889960015413	0.40932169160009	0.265450644785348	0.480417696061697	0.328970843747539	0.240042030398227	0.357559571509833	0.393226496709288	0.249184543873843	0.488228699849144	0.351360055883789
CHEMBL1963833	0.478682301080085	0.378917708734509	0.465338856498329	0.437942828865109	0.627874346112402	0.713800453009911	0.400502150150078	0.608802704796608	0.612513857012511	0.330515136613103	0.606385771734953	0.569057252051713	0.364384863714029	0.419163693794405	0.607056665550213
CHEMBL1963745	0.847230531274754	0.664368630629458	0.635167477953252	0.896622639158011	0.726451873961516	0.722837688777797	0.78486269682428	0.585921518059301	0.736831059832316	0.836360975702755	0.698441166525437	0.719066255065395	0.794371591099684	0.609543637534656	0.774706976228003
CHEMBL1963724	0.631499908103373	0.466317930947558	0.539099821310392	0.644603580745077	0.555850353459213	0.590156806019525	0.660825878104863	0.468274102551647	0.593096011196124	0.601692305756264	0.54418907099768	0.519494202046125	0.624997663380177	0.483102990339508	0.582967390905486
CHEMBL1738639	0.406116431830768	0.377233389539562	0.408979796023136	0.408518546559062	0.456541049754285	0.419692272887326	0.41384807900608	0.403216624543228	0.404414979953822	0.375603549469714	0.469404462830847	0.418953199109376	0.426100259020262	0.44542917017673	0.404858737723159
CHEMBL3214944	0.832766972325107	0.799067733190089	0.82044631857662	0.868093130684345	0.851010316606498	0.846671906672025	0.867779364599865	0.862809070314335	0.78230527632428	0.844447906683623	0.835467909342558	0.827986947369296	0.863173566505797	0.855397057387129	0.791964994341445
CHEMBL1963938	0.510774078842075	0.490158521852187	0.453478932046769	0.568529155358169	0.485515259979172	0.461784131560998	0.528307363933903	0.504754359330098	0.364826125787462	0.50611289822508	0.502174709599994	0.450380089839929	0.513173740563008	0.506116300004891	0.384097224565132
CHEMBL1963828	0.567656757142233	0.589435740007539	0.397747038478915	0.623681271196094	0.603387209309235	0.516023358145675	0.523554101659856	0.542308937443358	0.519722948335113	0.622342735288891	0.521302704557415	0.560650816515598	0.501728450131583	0.575262263283728	0.530957442405215
CHEMBL1963808	0.674849019446742	0.631636561120086	0.606063639268959	0.666684413634672	0.691950549773724	0.719311894413378	0.612901422534053	0.608009537833494	0.559377546929715	0.59497182061936	0.667786471881485	0.621143542267315	0.612281933408838	0.673002528462456	0.691069767664945
CHEMBL1909172	0.644912457271912	0.854678867416414	0.70550949957664	0.698506584771924	0.740844058266681	0.705645850653679	0.716857187163933	0.616806157728684	0.751276046190956	0.648698952939252	0.775496930706395	0.637448116675761	0.705406769855033	0.576668721036234	0.772604247592491
CHEMBL1738369	0.708801392897083	0.681452793478891	0.719142456235589	0.78935642806508	0.67425472688963	0.681401581065467	0.70904126312465	0.68596522916286	0.647473092538445	0.757017182594659	0.632607219057688	0.709476240077192	0.736912938599102	0.716570410530171	0.64979693183632
CHEMBL1963812	0.828992042394513	0.638466210475775	0.673011546640614	0.874591652361265	0.696081866198505	0.766850018727097	0.828565743293381	0.628651333802177	0.770076907475367	0.839154132043626	0.681348817205289	0.68621908133103	0.835886408090369	0.667436490366589	0.760341791440987
CHEMBL1909182	0.0515398447557613	0.204586454691874	0.0802357253441439	0.0811737482790114	0.314326358817467	0.135220694819685	0.104872983676229	0.372408379212074	0.113793365889116	0.0229192008481623	0.215291136161303	0.118844612900043	0.360192107142776	0.396839765219016	0.101616935927127
CHEMBL1963794	0.668572578507253	0.568348232212989	0.511434448042029	0.717522504837657	0.710985774522668	0.583987487155943	0.715598269872128	0.664501838531779	0.489962461951556	0.582033713959595	0.732152244024488	0.534588757058636	0.706840002499555	0.606137327983528	0.531190337224922
CHEMBL1963836	0.3684956217825	0.458112805707283	0.206823958540058	0.430856291533932	0.55336774375169	0.235320889823782	0.488273542535149	0.393759908502885	0.221515509695822	0.359394847243018	0.48530221214701	0.340313083864339	0.45667367750584	0.546140165203674	0.233786052170399
CHEMBL1964105	0.565297580927891	0.607458221424944	0.510427290035914	0.530826908827829	0.671490227022024	0.572091942111853	0.609129598100546	0.596969012145358	0.595692344536961	0.540972914026506	0.557438606988645	0.557685086837834	0.60841935117391	0.602128399169605	0.557938909641286
CHEMBL1963809	0.51820546541878	0.640275568761996	0.36942315959035	0.509077426558481	0.678343894902887	0.468566877358433	0.41075866946791	0.613352424251144	0.486563186094041	0.519079995892143	0.646411833826224	0.457993235726123	0.419261991696997	0.656355264957242	0.471740983633487
CHEMBL1738495	0.977127425616256	0.985362287367663	0.973528573447191	0.988482975266366	0.989148599777171	0.976279128870419	0.993164053134541	0.992147900330938	0.940055121457352	0.989266935294288	0.996865908854326	0.977588837972353	0.989657927929588	0.989053702998681	0.952016741837116
CHEMBL1963800	0.696818628621819	0.72822116753603	0.593384213754501	0.701262988390408	0.765724580266943	0.546995414087373	0.701258532836453	0.718595100918456	0.563134801896222	0.635218851278117	0.748354930672876	0.559629827449978	0.697478795030362	0.791077568554051	0.557705125551154
CHEMBL1963748	0.736778912814711	0.808168953297252	0.569187621720337	0.686386046933713	0.826420268656618	0.628951268218492	0.719672753328898	0.720931489586047	0.649429668690699	0.736592774645238	0.836614197974296	0.618519236275869	0.711287949132404	0.814808181323408	0.63826297009847
CHEMBL1794303	0.984629883497177	0.992825033061742	0.978682139609355	0.993216895233224	0.993417336123233	0.990010475086178	0.986076650121072	0.994322368551391	0.988164438038263	0.990799248733033	0.991328178633253	0.991165776031054	0.983861284975589	0.989121741069491	0.989827909502847
CHEMBL3215210	0.978607612118793	0.9930842152906	0.972155707789506	0.991868371884522	0.991442696796465	0.999590088779223	0.99104109117461	0.988372343838922	0.998564215219373	0.993330849790107	0.989331456828815	0.998353649262304	0.993946756886711	0.989050728934876	0.998966688391785
CHEMBL1737912	0.721284047291588	0.790675455580454	0.749314671360295	0.771466826545331	0.845281455941543	0.808281318484121	0.732616450743914	0.804099878848581	0.810504221734889	0.863526361318207	0.832215698069528	0.835734751917665	0.729379974521388	0.795217292692808	0.767465671023752
CHEMBL1737967	0.211867185772247	0.212801217085672	0.261260954422976	0.247639686662028	0.186030412917769	0.227866180986376	0.23947662617932	0.200401501507352	0.218196857196128	0.192735653146182	0.211729101614118	0.289624611046117	0.242024878279904	0.255178967877865	0.249767315390854
CHEMBL3214902	0.652121908857425	0.670042409810364	0.697285772702365	0.749363145958202	0.714836490782917	0.810971946869203	0.640778630759087	0.593520746285529	0.731673171363773	0.711482598974921	0.69169999740373	0.737003875042564	0.680097546540532	0.710828934430191	0.77352416739212
CHEMBL1614469	0.786221345049035	0.909331168729552	0.853861600145151	0.872313800416131	0.949980286263563	0.941358042562074	0.876189976851451	0.904215159071233	0.918511806709656	0.858802650660447	0.914640623658401	0.920267386078305	0.836881745169579	0.908386626898833	0.927895552889799
CHEMBL1909087	0.423354703319798	0.634917243193251	0.63996837537238	0.454945444084971	0.697601517954975	0.79811719244549	0.388506187528802	0.639822338408325	0.736352226925364	0.541677865530956	0.721110653418109	0.731185862862205	0.392071415389849	0.674711352015795	0.768912633040513
CHEMBL1909088	0.515660424911566	0.680018380098992	0.77170308546376	0.652701001296549	0.692021541521124	0.765982768078613	0.544689264919368	0.674384916932375	0.750114293558488	0.638816480013598	0.683385801691499	0.723853616012975	0.56338181157511	0.632143972660458	0.768458045951177
CHEMBL1909140	0.284928638681688	0.549557782855952	0.579183279601132	0.275370199059651	0.543177366960617	0.836756792448405	0.310359425109538	0.54995394015225	0.678829126918708	0.421287610717771	0.511709789284302	0.77410980298988	0.514398461662477	0.624249647602646	0.686330146932771
CHEMBL1963761	0.330531968518726	0.403883916917465	0.174860372948337	0.277476511769478	0.506614430531828	0.209940110289005	0.285447996885256	0.391995126478398	0.178522947932686	0.261669808049444	0.439993988806223	0.195703736026261	0.279903484907398	0.407271362999735	0.161673293741662
CHEMBL1909093	0.134349320811672	0.393809655324329	0.271818070677224	0.504128468216866	0.387076259075059	0.392297349614423	0.508858543417367	0.209410246329751	0.0757527306782468	0.503343298455406	0.552128427128427	0.0725580057583604	0.506215564738292	0.211477112723087	0.138247263081948
CHEMBL1963735	0.629843413705029	0.684741364937314	0.513343705040117	0.772837337591064	0.748691258515488	0.592564791606498	0.653095042606812	0.706461780659023	0.535357581895727	0.710427377269569	0.696720102865079	0.476134702152425	0.679201409940685	0.751687848104527	0.579751252634301
CHEMBL1909104	0.482501872355362	0.777592231184254	0.596153983307552	0.506955198377186	0.817137650851371	0.765142724347713	0.445332189055003	0.696979181296973	0.619837268127982	0.517904885069354	0.7832413748409	0.707484473394315	0.511587542064023	0.802407739996513	0.641139001953096
CHEMBL1909114	0.358881263506157	0.476793393701976	0.421369596666482	0.445770000194665	0.382437997605395	0.569483933174409	0.681814666814667	0.426068708171389	0.368959522001401	0.204030951674975	0.279694783143354	0.531264206154461	0.603102579426674	0.453411215390231	0.389791839680852
CHEMBL1963759	0.552127874929926	0.379318227164996	0.483912686820691	0.484661036355935	0.572668368072726	0.605669619532635	0.454608606223886	0.479322947136067	0.420539941249899	0.407032662185739	0.503219993488734	0.54342440522116	0.395828090517729	0.479004664122191	0.503045830285732
CHEMBL1963694	0.431919642984087	0.38548242319314	0.0799831687277498	0.162108830698322	0.287090504522961	0.0942183105149489	0.403814056509449	0.263516678838497	0.180378691067683	0.114461707481227	0.224331716954242	0.0601034777840434	0.287467344469698	0.434528422035485	0.147110301614184
CHEMBL1963756	0.625885690561437	0.592609037698847	0.522679195297974	0.607977640476016	0.674163225124388	0.66247749263686	0.624472606869755	0.599280479488366	0.582457525907188	0.577802081367344	0.595816429318171	0.564439568231707	0.616791637888289	0.636441820270885	0.599434669072839
CHEMBL1909215	0.26305671548981	0.512192677905594	0.57473439481468	0.479613218214853	0.741790293040293	0.606552543100364	0.507387235742763	0.454770632402211	0.484865801056437	0.210432994099911	0.397228318751044	0.524573191076992	0.553914224016132	0.588634186694531	0.408688622823465
CHEMBL1909213	0.0158860223210885	0.00714285714285714	0.016271386618999	0.0500584072012643	0.00833333333333333	0.0138212036639473	0.0225448879100485	0.0072463768115942	0.0573593073593074	0.0155999191082564	0.0294117647058824	0.0173793128794181	0.0241053192110177	0.0277777777777778	0.0608851674641148
CHEMBL1963783	0.584642539097717	0.699549489882944	0.672174119887932	0.628218347830823	0.789782196166419	0.784313064088736	0.598158477859738	0.725165629997949	0.728350729657542	0.603900293683966	0.787389843823766	0.744639186797048	0.607154211080351	0.747051043632781	0.785955687370201
CHEMBL1963827	0.841667002203331	0.697096476316202	0.646001656199089	0.813501729271911	0.766295356888569	0.764642401295457	0.816776082003845	0.74145025908637	0.751012673621522	0.755380854141634	0.715839145823586	0.739857268758746	0.815075737550746	0.747346768156926	0.79741215319197
CHEMBL1909170	0.676514520743714	0.881586620937151	0.654342005099176	0.710146115789574	0.710196847490021	0.595250463376673	0.698455857681047	0.651826678295699	0.723721005058514	0.712036161821817	0.744182206524704	0.608745314163566	0.715638735315034	0.568146993719528	0.795505989424013
CHEMBL1963707	0.692027984870568	0.710792584887532	0.668080805064461	0.673495103164322	0.764772137801217	0.752348870819326	0.685841911226934	0.739016474477449	0.691226858560243	0.664055059019715	0.757136424852197	0.724608095753724	0.709120526362562	0.734293812808895	0.715569002313981
CHEMBL1909192	0.00301204819277108	0.00805047949860303	0.00326797385620915	0.00224215246636771	0.00516068971392351	0.0104166666666667	0.00381679389312977	0.00393921272608571	0.00208333333333333	0.0034965034965035	0.00551636643817419	0.00260416666666667	0.0033112582781457	0.00499829695943713	0.00182481751824818
CHEMBL1909206	0.0833333333333333	0.484563073650605	1	0.25	0.371451059968113	0.015625	0.0161290322580645	0.630886041187549	0.125	0.0454545454545455	0.0956791489500534	1	0.0121951219512195	0.336828323067826	0.25
CHEMBL1909095	0.0762987012987013	0.25329929403234	0.598214285714286	0.140277777777778	0.524483366146597	0.0677640374331551	0.105614973262032	0.775605603379393	0.0405944055944056	0.525287356321839	0.310273045441529	0.0311602176172138	0.520457957957958	0.552889090975347	0.0396164021164021
CHEMBL1909097	0.125	0.00416666666666667	0.12469512195122	0.25	0.00390625	0.753152351764798	0.0625	0.00174216027874564	0.1048800056153	1	0.00367647058823529	0.775649350649351	0.166666666666667	0.00174216027874564	0.224042443064182
CHEMBL1963706	0.864612429270714	0.647739034771886	0.622615055193349	0.876514785438336	0.728462481010441	0.659785364894446	0.823521046820557	0.658298171791094	0.63563975488366	0.839175003808694	0.67606959794924	0.641854547524656	0.822218959510426	0.682370136271045	0.670132058648039
CHEMBL1614522	0.849617001152001	0.803800072297877	0.683253358709201	0.800032881308098	0.735762945645343	0.706433746783229	0.823178331157039	0.778801185734592	0.760380949185468	0.855252586576021	0.775248170608036	0.784462092744958	0.8415756032061	0.814511514409737	0.768761625863334
CHEMBL1909115	0.653303075931534	0.77719512195122	0.876405942675355	0.82770314529471	0.854411764705882	0.838045258398191	0.568570634247211	0.706497053670967	0.812627026774687	0.638060946735723	0.684040293040293	0.620175573214868	0.652653238246083	0.706497053670967	0.810365691985268
CHEMBL1738502	0.941268969857193	0.906146102140554	0.939763068129157	0.946002201927461	0.903705574399533	0.946902046370322	0.93695606656472	0.886362940134896	0.908715365326018	0.948705431876281	0.90390371059388	0.942683492574198	0.918839719723983	0.899249061796506	0.9210490521203
CHEMBL1909139	0.295246103104359	0.559720393580995	0.599873200989508	0.243546152017424	0.714621484240101	0.790983315208564	0.280933932620005	0.782776036762904	0.700299441416625	0.372953790568799	0.707368720791267	0.715895544548703	0.288440152333464	0.623980416794182	0.729373714098761
CHEMBL1909204	0.363187446408729	0.438935042791776	0.284610483047052	0.601346448291116	0.527463061926924	0.314739442701004	0.428751688164941	0.41641883566904	0.122719964674644	0.374982233911455	0.119010269057219	0.118584263302853	0.447548348440175	0.279226006831717	0.188305550127028
CHEMBL1963810	0.769953881387007	0.7609957604949	0.682601427463706	0.784745381357074	0.732668211742963	0.643493682052404	0.738266724834417	0.688547792300162	0.721356217283194	0.754687269905432	0.680476600716651	0.650541323286456	0.742621993375332	0.759091996124575	0.73569949471527
CHEMBL1963767	0.497102298800294	0.595959938189183	0.357667944287167	0.478914569348022	0.643076884473642	0.540373265647679	0.467087366346216	0.551783480222245	0.421557243358521	0.343803517822369	0.614484495180775	0.371151933974364	0.462691270167683	0.648705013003682	0.480630661677174
CHEMBL1963966	0.984385989625692	0.989208330734033	0.987857108774206	0.99647649130191	0.99707882727537	0.98876281968505	0.996477843951514	0.988344476779048	0.99298992690378	0.993729762912934	0.996229609587232	0.987990763201758	0.995298288546239	0.996874811133438	0.990440198805346
CHEMBL1963816	0.345897987374862	0.299764194594641	0.172563008670946	0.288865832210737	0.255394369801523	0.355931643786748	0.275529810907585	0.405378009651194	0.171199372508705	0.238743781562219	0.227252045199696	0.232975830209483	0.235574629096283	0.378023908397751	0.243700114236388
CHEMBL1909103	0.153133903133903	0.567122051494022	0.276297965434499	0.0931163135110503	0.758859981028259	0.6894103888565	0.150287356321839	0.676156026729694	0.617142994384842	0.133555381400209	0.612030225248305	0.774387958806973	0.518002322880372	0.73376240017483	0.55114994958745
CHEMBL1738552	0.653037617935497	0.721755883411811	0.694314855616465	0.720037391160004	0.744986986974091	0.712541797341212	0.591322400351868	0.674946002008498	0.627265912262075	0.715515348187418	0.723404062583075	0.688278544491847	0.667202844982964	0.74578340512314	0.673717603549406
CHEMBL1963714	0.585913395609961	0.543595370968543	0.543397289498714	0.456681440514173	0.533291906950144	0.513230973398493	0.510758869120325	0.483133239477699	0.498849113518852	0.421188210969987	0.470096010257612	0.372777522998717	0.514650765390833	0.580505964024705	0.557705327517303
CHEMBL1909102	0.692387828756693	0.689160285388134	0.576003441345864	0.815945580378585	0.697409372506124	0.7062438090662	0.5282521021024	0.70998790066798	0.584171510235229	0.614931357243153	0.676908619278874	0.635243195532259	0.640537206555888	0.799567088794887	0.588651746045691
CHEMBL1963704	0.682680471305304	0.618299170885686	0.518911376844239	0.714710959397705	0.685865824043722	0.653038023555093	0.623168702625436	0.569482747964229	0.53206741011692	0.650222369078288	0.594224285727772	0.516514912960188	0.616773220324756	0.666532025183945	0.558135653956943
CHEMBL1963785	0.681473339548222	0.591355459004649	0.531667271732317	0.707407969985358	0.642732120111931	0.487534349381628	0.572978326714358	0.523337229427216	0.505411787767748	0.696383208846537	0.557384640278002	0.433945699487203	0.584427098966765	0.579090918810416	0.540185318546493
CHEMBL1963739	0.381013928328636	0.581414939869875	0.312825139867472	0.440884045998041	0.521607414216506	0.324926824466395	0.324514481850536	0.474328925102925	0.400484808029683	0.358427151890622	0.546050990450791	0.227169979104351	0.335775739942372	0.622668703251779	0.426984142446286
CHEMBL2114896	0.655812188972414	0.59752476205929	0.552664058500198	0.731454855212847	0.634389028200589	0.550201667778524	0.665940005460729	0.573597396191354	0.571417824643478	0.633008569772852	0.576984420241278	0.488006964104518	0.688989531968725	0.576796941499175	0.560060564701291
CHEMBL1909143	0.458177550628716	0.655125086089867	0.573657908786829	0.382817055402009	0.583855736749211	0.619993775166827	0.44833869973024	0.684899638197273	0.678561028541353	0.303008671539165	0.483757272001323	0.580116606568549	0.444493792500129	0.719457391137872	0.621774618250202
CHEMBL1963817	0.573770845405036	0.569134857673495	0.436494186124612	0.676649807806979	0.647607409356896	0.380561023753605	0.512497246939813	0.477524997400301	0.450126543680909	0.606967477547639	0.610786001588583	0.39797730140354	0.509635728958207	0.560649750518841	0.43739746715255
CHEMBL1963788	0.813193254207246	0.661281854585962	0.71738696217723	0.845567080303631	0.695468274180408	0.677838859851205	0.773638450425745	0.664224368371173	0.712163101654402	0.789804943550176	0.669588138967459	0.641744883962841	0.800389849729179	0.685653078257514	0.726712115119708
CHEMBL1909124	0.00324675324675325	1	0.147441312651446	1	0.0277777777777778	0.355932654379603	0.0217391304347826	0.0714285714285714	0.695812807881773	0.0357142857142857	0.0178571428571429	0.534360288297296	0.03125	1	0.231320008493922
CHEMBL1964119	0.758080114299874	0.694991928366839	0.553045074965692	0.795329424758353	0.688250715690541	0.532469497747445	0.67676545426618	0.6272929668271	0.583287382301997	0.742860248325449	0.618906462670133	0.497670363376552	0.676172474825015	0.676044058022221	0.601037878211459
CHEMBL1963779	0.833669817962687	0.674714839914936	0.702864971499669	0.859323467490562	0.711713704282405	0.695853856778323	0.791498906101418	0.594830387495114	0.631387108086298	0.827454711006935	0.684320501758335	0.64643299795967	0.788064853190973	0.656856655637018	0.64549398301869
CHEMBL1963768	0.61171001217786	0.46088143301419	0.389116304309118	0.736637919149249	0.583851599029068	0.456205095998063	0.638970437444827	0.577579915667393	0.552779412701376	0.663088277008909	0.566833230583169	0.561735727420558	0.586977235289583	0.574564405895947	0.555191807102033
CHEMBL1909084	0.00495049504950495	0.00968475968475968	0.0212730272610512	0.00806451612903226	0.0253323397402953	0.0100509804669397	0.00316455696202532	0.0253398767549711	0.0190521410326122	0.0142857142857143	0.0102265747400655	0.0119868179536275	0.00892857142857143	0.0144425161368895	0.00888150726265935
CHEMBL1909209	0.191393946226024	0.655019899898082	0.46525416709643	0.618127170925166	0.69591884502503	0.748786219945735	0.509197034516034	0.504997360290891	0.516187448179586	0.46401783847406	0.61194027412823	0.651057429705974	0.430273303019471	0.523979479752161	0.539632708236652
CHEMBL1963749	0.756710821276861	0.615031263459432	0.615809050786839	0.69618724555802	0.626876442189399	0.682603361341296	0.634126556104411	0.575678639429256	0.633813854683618	0.622773879497206	0.533317468593433	0.590875309539828	0.650031369576144	0.659821491873288	0.673666916358854
CHEMBL1963792	0.325652292591639	0.35718658127345	0.382119391538181	0.436198786414348	0.463670056890574	0.35659047403018	0.426445698244512	0.300906881314669	0.372906929126	0.321653878235677	0.425885456296515	0.359930926328763	0.464036470301675	0.405561716396828	0.393763484416845
CHEMBL1963826	0.870977060101463	0.641199223028711	0.665767306124952	0.887243106845924	0.72719910743176	0.641227616795016	0.781518615019021	0.628520678581746	0.656951362574781	0.882068543658895	0.70127648683033	0.593722378319946	0.774811799052579	0.678491083600404	0.674844742878705
CHEMBL1909165	0.476546219987347	0.178642035770452	0.399309476755129	0.494772675472814	0.181593722354993	0.25140306122449	0.58252942240393	0.3235484704388	0.506060606060606	0.694592370348949	0.340188562926069	0.298800505050505	0.656358613847838	0.358646076015697	0.561962365591398
CHEMBL1909211	0.58274153473316	0.751013479319328	0.644003802602395	0.671143051404143	0.754028793527216	0.742093451363273	0.58117685494027	0.635718679748849	0.666692869031772	0.729850155297236	0.711885730929261	0.730062655788823	0.666406503436099	0.752088897938212	0.720925347206713
CHEMBL1909214	0.0105529236223462	0.340100510853584	0.228825981137561	0.0225818615287306	0.036018523010004	0.0391759768492816	0.00707736313088109	0.0336018341963125	0.0966422054710519	0.0515789473684211	0.0300034590107229	0.198685514691707	0.0138371990475351	0.0230309391886993	0.0796452051977783
CHEMBL1909184	0.0102040816326531	0.302354007688669	0.274147451809828	0.00602409638554217	0.0549511667300988	0.0139114134304256	0.00909090909090909	0.496659988101071	0.298591182269919	0.00308641975308642	0.0143678282065975	0.0790610457431963	0.0119047619047619	0.0421541100575953	0.279581543586966
CHEMBL2354308	0.938357354614859	0.929303764251464	0.9418825842598	0.928827307016414	0.943417176274888	0.952133640988149	0.946361265005849	0.899853321364606	0.943357914620115	0.925419606940071	0.898555012725323	0.931984095647851	0.95988779159001	0.900502547744325	0.948367815550659
CHEMBL1909181	0.00265957446808511	0.0907505063244895	0.0702404506208788	0.00714285714285714	0.103728183434485	0.107036646115642	0.05	0.145081626499537	0.069734048686328	0.00364963503649635	0.154457434888731	0.101156756176014	0.0227272727272727	0.413371319854106	0.0645183939760549
CHEMBL1909141	0.426873508580888	0.790786306060555	0.63469882044795	0.445613807928845	0.754856353916831	0.785506457876098	0.488641866844694	0.803441824685816	0.745657120568529	0.549808469073822	0.707779954788162	0.720809308892199	0.551133799634389	0.821751789718221	0.75321688944054
CHEMBL1909171	0.65120400479874	0.639204999603214	0.615705949142226	0.701002356750171	0.65432029791831	0.578961578591078	0.729684490636753	0.542221023277645	0.571979776506386	0.739801118813519	0.431189108362522	0.601471188536387	0.726543599631391	0.437137062844685	0.760899853386408
CHEMBL1909150	0.76409051828602	0.841666666666667	0.798353818168257	0.887550086374299	1	0.936166910697703	0.962548167397466	0.94375	0.935712762412836	0.900206848987809	0.678192640692641	0.906555617569906	0.964992046592393	0.811011904761905	0.934578229704377
CHEMBL1909131	0.277845882850964	0.545013457888534	0.470182601956796	0.289319083148484	0.58283519804065	0.301144157774593	0.155510344271242	0.416265001711084	0.126052841723862	0.148467742053038	0.498415803365214	0.271091408591409	0.241052514442264	0.271203739970758	0.136823349357836
CHEMBL1963699	0.528304869026495	0.641761629247417	0.354833910541108	0.494925657593983	0.654795586861144	0.356859896416261	0.459104628902567	0.620370814170566	0.414289820235907	0.403792444596729	0.629802863129103	0.278267052055903	0.428470057312484	0.715384862788417	0.438782054521521
CHEMBL1909106	0.514314516129032	0.545556779880736	0.369785296941505	0.154761904761905	0.67706043956044	0.175437604351348	0.0289270687237027	0.399467199467199	0.19303527519717	0.139880952380952	0.381037595089369	0.367249918410909	0.029099025974026	0.376423867048867	0.26684178000935
CHEMBL1909105	0.47369267169764	0.654727103846821	0.60088788220118	0.575427945791298	0.667502251570591	0.699909217036763	0.561140897518109	0.551551584269644	0.640660055887041	0.65722416392741	0.625454956351206	0.671940185288599	0.602514106655584	0.622818483072	0.644398163938542
CHEMBL1909142	0.0217391304347826	0.03125	0.123777261410992	0.0277777777777778	0.0625	0.0672842568562045	0.0384615384615385	0.166666666666667	0.355273974391621	0.0131578947368421	0.166666666666667	0.173961922397002	0.0192307692307692	0.125	0.17018720300454
CHEMBL1963829	0.436887688980894	0.320218228198123	0.381039214470825	0.507155254375778	0.428405096329112	0.509517242251249	0.355005952025584	0.316006222473323	0.400039956638051	0.42207734797713	0.361399524693182	0.432103341606995	0.403150890780941	0.35669492748114	0.39355104984429
CHEMBL1963781	0.124861559721567	0.142717382118401	0.1103269055486	0.172296080607547	0.328437844027312	0.355971987510696	0.163887325907753	0.0988246093198035	0.211705031484177	0.176315303190071	0.465679584868213	0.295303026653235	0.281143794746335	0.126928937946853	0.284656544543729
CHEMBL1909091	0.61676409402954	0.49279786967534	0.367112812397392	0.531388888888889	0.574492174492174	0.527533813151822	0.560219298245614	0.506468089990817	0.237376903462086	0.425464878258996	0.286175383546894	0.391352202936511	0.57547619047619	0.229340949478793	0.436254559794932
CHEMBL1909145	0.582883752445133	0.439285714285714	0.674157390228819	0.721078431372549	0.570321637426901	0.753419701213819	0.654390096119419	0.699230769230769	0.706139455782313	0.765212912087912	0.486500974658869	0.605896733693477	0.494172669067627	0.503021978021978	0.380408779244578
CHEMBL1963691	0.726590231243526	0.778818299568767	0.703512966720819	0.803130335397939	0.814917041819602	0.706464957858828	0.771279594220436	0.764072594122	0.661328712995999	0.767277638525187	0.797823393335174	0.676042117558698	0.766247084357325	0.797356712245528	0.665028441215798
CHEMBL1909090	0.338158916121353	0.691636243660053	0.631304834293237	0.422746892269589	0.61433263527532	0.677364897804385	0.317173409773083	0.545825262347233	0.630700010165431	0.259692654903836	0.658783571736338	0.614222512820321	0.400205573567357	0.602666835292391	0.639737483915697
CHEMBL1909205	0.171728734228734	0.0412048159143203	0.0384615384615385	0.555094627594628	0.0523455727553436	1	0.0938195386033151	0.0397375058255979	0.125	0.308836520314781	0.0415055743898562	0.00543478260869565	0.470645314385069	0.0491678945288117	0.166666666666667
CHEMBL1909121	0.714621610090854	0.825069492011387	0.729075559366722	0.789936260114865	0.800076711607994	0.759150306372929	0.608394409991453	0.65961581170392	0.741584346101106	0.686215063839827	0.68704803685066	0.74981190622374	0.646541648099127	0.924312112788843	0.706978086405566
CHEMBL1963719	0.720641668688378	0.73317828099074	0.624637108733274	0.712366118837285	0.711034124120483	0.546298091971693	0.720134136371234	0.634976909591444	0.53380432522842	0.696669074338998	0.65743705644993	0.513441619029477	0.720516075660535	0.738396316955112	0.534386481854587
CHEMBL1963703	0.607660516874886	0.669405483717122	0.470363952130549	0.61819977543958	0.689932734484621	0.591658103582311	0.592627690016707	0.707694670764455	0.558730656139482	0.647534550731048	0.70403369780134	0.57492117866051	0.620994675103744	0.742550208990766	0.619915378218525
CHEMBL1909148	0.0349180661388714	0.0031055900621118	0.225548932555881	0.44921157059315	0.00458715596330275	0.317799286416687	0.0271537967940378	0.00239234449760766	0.120198886547321	0.518372830872831	0.00581395348837209	0.327268231170799	0.0488010894958417	0.00205761316872428	0.228605971429733
CHEMBL1738578	0.868319389517272	0.789605807042066	0.877405805100151	0.900915174749266	0.859912113171195	0.920556203906474	0.874669618804158	0.821388036030878	0.851789623802031	0.872932772345084	0.839832127309533	0.897925109710877	0.858130060751692	0.835761928283821	0.84475095691223
CHEMBL1963837	0.92039247462648	0.912998408792177	0.898834983182671	0.941542107890859	0.921257841349551	0.919519881136545	0.92971354068111	0.910344796503547	0.872931848622579	0.93479322639537	0.909558675756971	0.909545888871143	0.933043167486653	0.925269304524263	0.876098660015071
CHEMBL1909138	0.423714930534645	0.408608772596288	0.329651207597527	0.43298606155749	0.3791146592406	0.597978907005314	0.365020648484223	0.411919059903977	0.676941371967909	0.585294253679994	0.287271925250528	0.593699594135166	0.287412560381584	0.435510522271806	0.838962483479029
CHEMBL1738682	0.384382283427215	0.422238392710141	0.340536828812258	0.383343481769389	0.481057997201976	0.396527656787715	0.372922548942534	0.438073971245846	0.433992450989352	0.386081137028757	0.44016683035279	0.385385793544881	0.399829727510193	0.416379205388417	0.395678586478423
CHEMBL1963740	0.707573546454589	0.621245303892775	0.495714642925943	0.792014665700996	0.651705994825056	0.554440456066601	0.61447507065076	0.56654759833214	0.539524901854235	0.717905272776499	0.620440770151152	0.484277590230688	0.591755702142137	0.63365945831008	0.553117620291988
CHEMBL1963722	0.819353733762681	0.840493792639506	0.733484932355645	0.818748468913396	0.890159091518443	0.819665348433063	0.80974707555512	0.857615550642974	0.809860675975847	0.813611207344388	0.837889454371165	0.775367885811425	0.818309018229259	0.847916748350741	0.851808055568537
CHEMBL1963832	0.816098445072416	0.559394651459305	0.530362814526748	0.811466044135673	0.621770050657859	0.599793971337252	0.75142013145221	0.544474634988686	0.613967134512626	0.754116404188888	0.542335442139865	0.552887226792691	0.748992403104968	0.577547813622856	0.642946664323674
CHEMBL1963775	0.678580208165957	0.379534003888068	0.319789217789196	0.648310327768526	0.404375339402708	0.40935033675236	0.573208713151406	0.315119991306559	0.317169787687489	0.510480082503315	0.417347402550192	0.314032514189967	0.525922813618246	0.380913496858306	0.32819807178927
CHEMBL1909092	0.388268733134933	0.398407919241253	0.362176198517311	0.596095534218458	0.644351924133345	0.450893875014298	0.357515246248593	0.453930614919335	0.232503285734584	0.61327211506886	0.345491900286225	0.667491168215254	0.415208642010194	0.251078351151599	0.290086085468952
CHEMBL1909157	0.367033466247917	0.533804443788316	0.650902845668889	0.433708884240194	0.679000296250296	0.585707962114612	0.194368031084273	0.545212988152692	0.501803759355192	0.285927238550989	0.453213283959489	0.498290811496752	0.183480775393395	0.368128057554705	0.548300618058909
CHEMBL1909134	0.0460515299815679	0.385139993287945	0.416982647615388	0.0505641614292063	0.308323165610411	0.222664425306457	0.0477050957594883	0.380583613255803	0.420881984324272	0.0628008582755386	0.263119935353918	0.283613202668209	0.0419103061076804	0.398703235727251	0.297500080491949
CHEMBL1909111	0.335904673683399	0.516383006556412	0.553028142756685	0.47419680725135	0.497664750256731	0.60746112169038	0.325951520895502	0.420942966433208	0.515014400085646	0.379296269126056	0.592243579656067	0.540121941374667	0.35145049745047	0.478648348074672	0.563884855492705
CHEMBL1909108	0.553471113291417	0.563812990092634	0.525774014978219	0.756174779086976	0.57347666449929	0.730809760328356	0.609260693159335	0.511055607315742	0.647151883872151	0.743114335982201	0.525768566164336	0.666898619167183	0.676821599053846	0.540819902067448	0.692674243884766
CHEMBL1909085	0.416427946385438	0.613950869396087	0.632804909874375	0.545646225135663	0.657775210491924	0.72946385102126	0.373259419729692	0.531989026450714	0.627446126722479	0.47413668232288	0.615552967340094	0.668736642296593	0.397368487576066	0.614550440150053	0.635293195849124
CHEMBL1909086	0.495828803928359	0.796021080377654	0.642787626490176	0.555954565637142	0.834417232899066	0.768767130294774	0.417376014536236	0.626537560704999	0.728440995946242	0.542013942254918	0.79756563064294	0.749174718424842	0.401264349806737	0.745691433816447	0.76038614070203
CHEMBL1909112	0.688650267498627	0.709670547115273	0.742707311151096	0.844159386946729	0.732848847469328	0.73601830588993	0.613971235869744	0.694647274353697	0.712558510944781	0.695375293313888	0.631097942243777	0.694673582199355	0.566188646250418	0.76206111397186	0.716573225551986
CHEMBL1909159	0.230017781589276	0.583200332084223	0.610239943836225	0.593023235019979	0.54986749215946	0.756577027115914	0.277191810837904	0.48387375471948	0.686426162543518	0.499879506011444	0.561073119789189	0.685880725535858	0.413281307442109	0.617923424129764	0.719424492481589
CHEMBL2114931	0.182632119789149	0.0491153885617931	0.0732792839252984	0.485198962653667	0.424965362986579	0.0890521911198923	0.479724647076527	0.220251708783573	0.167167461197536	0.270832960315033	0.471488694518535	0.0381823478724921	0.534810329268153	0.432506470577929	0.172926921211796
CHEMBL1964102	0.558736167847605	0.689471430549229	0.57707608115563	0.531777420091725	0.70893671203796	0.6128742380748	0.583992824064241	0.664186766368859	0.635873769169719	0.546379122667418	0.693000886096487	0.532208151665456	0.548611771931091	0.776170964273641	0.617615064191882
CHEMBL1614063	0.403926018406412	0.213969068519089	0.146579761831461	0.379483102660523	0.354361204670802	0.413230130901377	0.51573008357433	0.260026011999696	0.332984098916593	0.312460938092181	0.241280926525772	0.512743853368853	0.422383387762693	0.338144191805852	0.636467715076461
CHEMBL1909135	0.0227272727272727	0.451028566330949	0.439228443796242	0.00602409638554217	0.467189175811206	0.338166135711788	0.0125	0.438799672979327	0.51971446871594	0.00396825396825397	0.361440899840293	0.420595462569153	0.00714285714285714	0.372816544798626	0.566265114281357
CHEMBL1909110	0.536009740790463	0.597330759451209	0.649738080047644	0.68537609933608	0.619646312750435	0.630300045839265	0.437830577641247	0.574466572140379	0.487381745156943	0.598092946167734	0.466654464734116	0.559451517200838	0.563718935563316	0.487469904134076	0.544329168219312
CHEMBL1909200	0.194834307992203	0.818105350248207	0.664835577531261	0.0992307692307692	0.613438735177866	0.213417233460101	0.0348707002007936	0.7977312136976	0.316898972257394	0.0540748144446295	0.448462696307524	0.400500844148467	0.0470614943154989	0.754013698264569	0.35053695084671
CHEMBL1909190	0.135839828329957	1	0.353492063492063	0.165411768860967	1	0.355952380952381	0.0596524597487957	0.25	0.17036603478139	0.126894835287892	0.166666666666667	0.11612591988557	0.072517773586818	0.25	0.395767371464715
CHEMBL1963693	0.530952338286264	0.552628567134959	0.579368484602554	0.554413379504883	0.565333240103702	0.533552160605715	0.531756651022298	0.519178443645304	0.488565117564045	0.52866542822703	0.479840769459543	0.484717697857472	0.514865658219286	0.581360279157552	0.453296572882122
CHEMBL1963918	0.484436162807322	0.507425792691045	0.432384705876156	0.539132150092834	0.625499432075186	0.493438244678675	0.596286934456135	0.577953983921519	0.425293312812951	0.595826956538824	0.56757213117647	0.44423675639004	0.601983793362644	0.628362021541136	0.432338066837902
CHEMBL1909094	0.574975609653021	0.720436929341797	0.762627581281708	0.698607967880824	0.700604042905746	0.721364245906725	0.6859896565616	0.673638699076055	0.681077576629163	0.586038055965853	0.634520588475204	0.730912719017663	0.658226272857887	0.744802252438597	0.700902855124007
CHEMBL1963823	0.639645155861992	0.41846529214005	0.468440101138269	0.750863610133227	0.531006022100922	0.476357559156244	0.498284066311652	0.4029493640221	0.448481329803104	0.655342571406377	0.501400272335513	0.385812812537845	0.489830159402609	0.495361767515813	0.559013672435551
CHEMBL2114932	0.936303358670765	0.961099897917612	0.956771074135339	0.948556458366445	0.957623631188974	0.959922461909199	0.968623486034681	0.955046423697273	0.971707821205028	0.959345281466986	0.971882793482869	0.956514580096589	0.96882879113772	0.957224791728862	0.97104968219062
CHEMBL1909156	0.648741363444749	0.85564847165957	0.655563008141747	0.626426768225648	0.907947659472858	0.766984585431855	0.625478044000771	0.640095942267888	0.663205553855127	0.58458980191962	0.885391061789088	0.645358562087464	0.580877191721295	0.798737095905723	0.704472165096392
CHEMBL1909132	0.476225234916199	0.180426051465717	0.156945113256618	0.0948655227919192	0.205885494497269	0.257269585738163	0.351826601312322	0.283303445754658	0.137929316699903	0.170598157278686	0.152280781408786	0.223857249241343	0.554649766250643	0.276008523019877	0.144016356862341
CHEMBL1909130	0.518037298840907	0.675263187917964	0.3310358800577	0.469771270120054	0.637199445831142	0.273738682519351	0.419944220231941	0.294239494153159	0.147890729969398	0.4849264115552	0.483688763942708	0.225352946494531	0.652580915445155	0.383829346242496	0.185955373819788
CHEMBL3215029	0.840421547903257	0.838144469835651	0.865752394948991	0.923873041100743	0.875454128619716	0.91419271777774	0.816394977000993	0.817725787300366	0.838094712237919	0.893512807336653	0.836779681531127	0.882157949182171	0.852132695790919	0.871362160294679	0.88900991382485
CHEMBL2114818	0.967022477356847	0.974821353508227	0.967901393542141	0.989805629621754	0.951472851765993	0.968876665617258	0.972309417349664	0.973679545367182	0.969981551379859	0.980646200192248	0.981573311589001	0.957470164439067	0.980707750925213	0.969926468329938	0.97449948456301
CHEMBL1909107	0.113063805067482	0.15292246736208	0.200000050801581	0.167658112050635	0.317181259330219	0.307048373551906	0.0878831322738886	0.182581818063595	0.200456964993425	0.377110172290895	0.233826139363258	0.468209820159948	0.0843038918710554	0.291163177308083	0.122071051950358
CHEMBL1963771	0.743335146746896	0.738197887541761	0.648519790947231	0.77368267681157	0.797639223686956	0.652250193135465	0.734530454818073	0.683002050883101	0.673621431422419	0.783088729755116	0.765663740620849	0.652972319071379	0.731928713469419	0.754979094648089	0.679421948750633
CHEMBL1909180	0.176617469599926	0.766666666666667	0.123400925969324	0.0605443548387097	0.393353174603175	0.125156868657186	0.0759987843934825	0.355602372034956	0.120195595983985	0.0162161290908431	0.348963703364265	0.417205693764883	0.0725461133069829	0.642628205128205	0.127684609776236
CHEMBL1963725	0.55420623482789	0.648436647817617	0.628287312010148	0.580480938836373	0.683608696873407	0.609863214136726	0.520385497704589	0.500967951841365	0.559023228398281	0.545268954020785	0.592781128115162	0.583380729491511	0.571828264184534	0.560975022929129	0.651932763132415
CHEMBL1963741	0.668701125689685	0.610936702716247	0.606621521108708	0.629344289226256	0.67172481436825	0.645175970469687	0.597688484157615	0.604579771292819	0.568442951163169	0.598549020045808	0.679782506662965	0.608110953880038	0.619010716750611	0.657784377610422	0.645045092909801
CHEMBL1909116	0.448218620022366	0.348855332298504	0.527155554854794	0.389649463596832	0.288049124242974	0.536475361626961	0.217641008349112	0.604530076405076	0.487145246110012	0.285781435545586	0.221596937645373	0.5391246011412	0.439939309056956	0.289082576475062	0.629755496564816
CHEMBL1909109	0.462761347205723	0.720430953553921	0.649479036452444	0.695558543970807	0.649800918388001	0.614509153178382	0.559201240014667	0.613812432490289	0.665591803812363	0.63352215646105	0.762089844920741	0.53999591218356	0.574317256604908	0.665832653771311	0.664083523632359
CHEMBL1963807	0.847876271393472	0.798653852063081	0.820721055013993	0.871858657405125	0.829694418973866	0.776844466430973	0.87086268273499	0.796562745861748	0.802211959362789	0.848076486695356	0.810512440567972	0.76344457178863	0.863051057659094	0.80989457484849	0.795449056860472
CHEMBL1909158	0.125	0.0240799523057588	0.0490442117124774	0.25	0.0668436617824976	0.0763052435555012	0.1	0.502598159361784	0.0776906782609348	0.166666666666667	0.0234459168282698	0.225335252982312	0.0555555555555556	0.0442648260284506	0.0649688479609757
CHEMBL1963772	0.824396159843698	0.676368295422274	0.649812992679071	0.8080019322306	0.672093528981177	0.638926176275157	0.754203928711549	0.61510189756434	0.605373281175419	0.779183881064725	0.630343418976602	0.635682853857337	0.759432840287755	0.651108918926091	0.659728201036255
CHEMBL1614302	0.00616384600328328	0.0148516103086982	0.209617969186651	0.160714285714286	0.0342472750251623	0.104894312887423	0.0466624149659864	0.0585975736958269	0.0414508883794876	0.0591503267973856	0.0980869282362076	0.123165359083712	0.0275141525141525	0.0393294867055248	0.0392470877768087
CHEMBL1909174	0.692419434531175	0.792609894887865	0.692387989657254	0.79247248843734	0.670506598499188	0.716240393751715	0.780134050173704	0.592374234552852	0.686495708539212	0.82048493648616	0.666677879050112	0.618663836134506	0.761452618424007	0.535411704043175	0.709579039400419
CHEMBL1964002	0.627128444988548	0.563114570132907	0.616475834280331	0.820331598994782	0.656126039192251	0.769485316645048	0.743411048012078	0.67045506214194	0.742155813323354	0.727646281049435	0.687595692071786	0.690127986792574	0.750059844915121	0.675622436984819	0.773912147203345
CHEMBL1909203	0.288424443773281	0.48485660608849	0.433605652502958	0.280371127995324	0.406479076479076	0.112612935775668	0.100343031724611	0.186478867044905	0.421056998048011	0.186677302582475	0.131130722361938	0.17041305004399	0.220068426197458	0.534874597525843	0.272530764442529
CHEMBL1909136	0.204147554611653	0.146673629749399	0.359669186703125	0.217422912401682	0.269486829209224	0.288521844920255	0.134778064702234	0.167732797917703	0.293555164063989	0.13825721393526	0.230985940752617	0.439528632143852	0.139356214141464	0.191000073887625	0.327907340758345
CHEMBL1964107	0.74501399260061	0.800166703159891	0.715465157566967	0.831729623047733	0.858540267875561	0.763857763155417	0.780472267116028	0.795386507608855	0.740114660806132	0.826929887311984	0.825624423251806	0.804956753294899	0.796953561383817	0.826186987835438	0.70749412748014
CHEMBL1909210	0.0768278195721871	0.424190720897067	0.524706269468418	0.30317596558293	0.593977522199816	0.701365519893103	0.283022570572824	0.415505431205932	0.608648050056946	0.343804599953183	0.584848030509795	0.659218605441029	0.350210967326581	0.560156960397908	0.650332277786264
CHEMBL1794574	0.992543672312312	0.991390774833433	0.99458531305094	0.994769336595339	0.985086246055473	0.994209697957147	0.995726725702308	0.991198136089875	0.993436759677942	0.990463208683392	0.99581692217984	0.997284327620903	0.997670606383592	0.983572341891617	0.996157029600171
CHEMBL1963757	0.705664393062197	0.536443278607112	0.433969062950978	0.734000465183941	0.59103727325981	0.519902757196359	0.630307563388262	0.408514367320557	0.495610908298301	0.668629371235465	0.53307412833915	0.478740364949193	0.633456361848304	0.486542255304788	0.546077152394794
CHEMBL1738239	0.357049123996109	0.371604276920272	0.396183212918973	0.407683618706787	0.341213490924547	0.460001579592157	0.361678740746665	0.370594011604243	0.48648371983685	0.360905188826889	0.357641996165386	0.449305990706119	0.340610905913184	0.346061004992388	0.470640871380445
CHEMBL1963690	0.614746406349945	0.643356730413384	0.54599655460299	0.57316927682135	0.643261377866023	0.626205573930242	0.532886566219439	0.57851299849265	0.548475640566011	0.507066982586632	0.605005844738165	0.574066291872384	0.502449078825526	0.630923663095828	0.527068860388229
CHEMBL1964101	0.828139817902762	0.820870124907701	0.794345165018336	0.873574069021441	0.820221353128857	0.79125183897025	0.796654198971305	0.764837038441234	0.755821499179728	0.872360388429761	0.779305397097752	0.803245994723349	0.803584716647804	0.794308376601296	0.788256671293626
CHEMBL1963715	0.68517144572449	0.726842006864192	0.663228809182626	0.688255700516433	0.802661121148166	0.643263299134758	0.688533111940109	0.760275222545949	0.731863834119178	0.668097571350333	0.76414418333001	0.691171052365653	0.711273854383055	0.789517750846545	0.751629266123609
CHEMBL1909191	0.594038468763779	0.672440763745112	0.782299503685518	0.770121684243494	0.887301587301587	0.811837726519165	0.637540913126527	0.80327380952381	0.742002536984635	0.73298848194593	0.638647342995169	0.746601682952029	0.768364124091856	0.772120098039216	0.800833551157801
CHEMBL1909201	0.435714285714286	0.829318394024276	0.424690709643821	0.536464217095474	0.747904325206957	0.642617765255847	0.217443895955584	0.889384920634921	0.252306685959797	0.0606580055031896	0.788508922087353	0.771854478592067	0.372158023556811	0.513995321061318	0.36222372697915
CHEMBL1909186	0.0123327982878545	0.0040650406504065	0.0192307692307692	0.195833333333333	0.0032258064516129	0.0208333333333333	0.00552864837392956	0.0045045045045045	0.00381679389312977	0.0142512232612543	0.00625	0.00186567164179104	0.00932753951715852	0.0131578947368421	0.00306748466257669
CHEMBL1963746	0.539800430604459	0.550863265274368	0.711844118785239	0.551211931804012	0.620658499962522	0.761667453005437	0.536632621531906	0.532000110495179	0.734898919809532	0.566525215284188	0.629972068935637	0.688132938486116	0.553445194106858	0.578475733510932	0.739304228709558
CHEMBL1963913	0.989827916111478	0.987005700949149	0.988142177365122	0.99368074046134	0.995795607716078	0.995454712626217	0.993978695873355	0.991561985926944	0.994846384868991	0.992283242424088	0.992134067142146	0.994235855079636	0.99530732264611	0.994371544450423	0.995129462676285
CHEMBL1963701	0.47367151669959	0.53257009786057	0.548819807672919	0.470380655739355	0.579751537335214	0.579452931487255	0.501491370929521	0.506118240342024	0.567952515933627	0.44894022353126	0.50167414907274	0.487636086211718	0.506388629643647	0.508103348313178	0.590654393592555
CHEMBL1963718	0.84493672579309	0.735702936602409	0.609827560115	0.865167671218295	0.764923787817134	0.595191628628895	0.789326774608664	0.709331160733277	0.654193530530496	0.83765055193092	0.718786210749584	0.598594259848316	0.795403906684029	0.760059066423564	0.676993714592474
CHEMBL1963726	0.710111101116128	0.792999849539069	0.655600524127745	0.711865950707559	0.827399156279805	0.649377316771902	0.645232868846286	0.780120449402676	0.633607622395899	0.753983566385129	0.805403318440541	0.676085890520236	0.676344783531454	0.821137157612136	0.666325894037125
CHEMBL1963750	0.75749020190052	0.576356604160778	0.604582094672074	0.71425730462705	0.632877981270839	0.647673328232538	0.666561551637148	0.526779353094211	0.627581487617938	0.656538646776836	0.603515357722911	0.556421257157663	0.617670645021742	0.600599848573346	0.651362467232688
CHEMBL1737966	0.844249201756965	0.803759744814308	0.846911157373527	0.857729043863083	0.81776840292847	0.837284261640085	0.878318923009185	0.833829559953373	0.796894922742967	0.846673498438005	0.807759435386136	0.84616635597452	0.836887506043646	0.794028204967115	0.822907995568083
CHEMBL1964015	0.779941296898499	0.642463648319957	0.59517163479248	0.78345092974054	0.709218693300674	0.715503566542501	0.751841343248865	0.734473181160797	0.641304893387819	0.785163478520595	0.640412019165474	0.654965062175822	0.72758026063469	0.764728642004928	0.617033510504914
CHEMBL1614004	0.942212383064672	0.943379534973542	0.931233782266802	0.962404821414973	0.971290077510256	0.92990681452902	0.951092023722236	0.96444079300781	0.89982624108027	0.947920862946687	0.959870545043972	0.921631245450599	0.944888102841242	0.965979443142916	0.890127285657619
CHEMBL1909123	0.0037593984962406	0.010692284587008	0.0622811087305403	0.00212765957446809	0.0498236331569665	0.0891888191481256	0.0454545454545455	0.0424818645406881	0.0381411038146429	0.0227272727272727	0.0566512104835485	0.384080177546938	0.01	0.113185704296974	0.0393880660931597
CHEMBL1614041	0.756115088126054	0.768374035323216	0.679085828645374	0.915981320001624	0.890816294670842	0.791170197198595	0.885088618686908	0.883698706436456	0.724700462966437	0.893624008627052	0.874133422620527	0.769070131349652	0.892448354748398	0.882627937573681	0.713436638010755
CHEMBL1909173	0.603005827119557	0.850254136305142	0.704570091525777	0.700248179915285	0.609803910837629	0.704019186290993	0.703169891140654	0.5352121447008	0.693182886592562	0.584515770476077	0.655498237903683	0.650459087959651	0.703644156284618	0.522312906229756	0.828263765122557
CHEMBL1614175	0.435222415686413	0.385733973807091	0.479742867437304	0.503424497212108	0.605371006297562	0.444929297004118	0.549967260738179	0.476773716258871	0.532722007756664	0.553529311767281	0.518917964632822	0.523012133556819	0.569895924107265	0.498021768899959	0.462774960319947
CHEMBL1963830	0.753166637972708	0.783393119598952	0.693695432297586	0.780068631868909	0.83888946274268	0.718903778257195	0.747787045753894	0.773983832762145	0.721661376721434	0.771955242734921	0.823230437494707	0.705660057086891	0.788045642628538	0.811626493413308	0.714846663365111
CHEMBL1909169	0.0412574678334736	0.0855661812075132	0.111500542742496	0.0837022452109321	0.112873181623182	0.113958825724982	0.0590045429385492	0.115464885508914	0.0547765329077404	0.055602277136931	0.09136799032394	0.290859649971685	0.0377742106423993	0.106786336485814	0.0667050227027277
CHEMBL1963723	0.809868127016475	0.749170933788873	0.700797207391634	0.824471189000415	0.822221677039331	0.768375030803821	0.787752134691276	0.737004320643199	0.725092562761364	0.797211787409179	0.734806004447641	0.711380396344042	0.803392064741604	0.776890069296429	0.764224276538465
CHEMBL1963972	0.873176952742506	0.872291954764235	0.882950399786451	0.878003098055377	0.894859980132764	0.897375470553682	0.856913297418167	0.866174163919424	0.873401385254315	0.888147098862703	0.882524147240775	0.895065766135282	0.86778055156732	0.878526015107312	0.891243188027064
CHEMBL1614432	0.133276666450954	0.150853203356617	0.177265247762211	0.0868915379981204	0.263184812304661	0.217244333607882	0.143832299385924	0.131330162538432	0.114165320858977	0.116434348451026	0.3403441845089	0.135639195412604	0.0903588317202072	0.238339918868255	0.140826197954615
CHEMBL1964095	0.743518037760668	0.715249808578401	0.657212378008352	0.734038321263956	0.776864741955945	0.756188489168528	0.758804952981223	0.721968429347455	0.683439549371503	0.741308024244589	0.745181822723804	0.701991621259897	0.735250883111011	0.777242745693748	0.678124884489054
CHEMBL1614524	0.945813808553529	0.918887605421919	0.942418363085176	0.96617381395772	0.947314663178769	0.963677060622357	0.967844166601512	0.944293597696694	0.963904169100301	0.956607667091937	0.932089939514945	0.948653454004027	0.970036160503873	0.948948282482693	0.965817891996584
CHEMBL2114812	0.99524865375452	0.998769777489671	0.996789402185852	0.992777467894495	0.998879307204177	0.998394050844399	0.993778386844585	0.999601708453781	0.996550109516579	0.99109731385823	0.998089697422453	0.992701247156699	0.993790315355669	0.998475663266082	0.995910161661784
CHEMBL1738500	0.369328439728103	0.405967301563584	0.491609371082352	0.488026031903287	0.589745286689455	0.564051077689368	0.496302993485269	0.486235137152406	0.576650329151279	0.506702718426671	0.519352644561608	0.540403993014124	0.486954768025013	0.542373947991148	0.545683618508644
CHEMBL1964104	0.822064941778132	0.474753903079029	0.518566031395861	0.877963659828912	0.536567181123311	0.490884533084979	0.797768989367802	0.525297382296313	0.558257622745605	0.878580602371525	0.520534054339183	0.487754954462456	0.766276581428697	0.536214718247059	0.552756490237112
CHEMBL3215245	0.831446822332605	0.816497041614247	0.762339971115245	0.855505465886244	0.896612690943237	0.832338863492821	0.751153105339525	0.828682290051071	0.803654084424524	0.788503107405788	0.82870183556752	0.807427091192978	0.804952070648423	0.846207552143603	0.807454323230505
CHEMBL2114934	0.991653867552981	0.986082188955086	0.988335603637244	0.987176891418283	0.988787796464083	0.97966005436238	0.987564115967476	0.984323496469971	0.984040362175724	0.991186007365286	0.99117030151375	0.971471167638273	0.986324090379673	0.99180323575495	0.986014594251664
CHEMBL3214915	0.897070440366514	0.944401743248994	0.869556353178269	0.938285041657542	0.946846699302122	0.893077334635126	0.902085317159628	0.939264061316217	0.85957696044483	0.873438268597585	0.912909336440384	0.863213324994413	0.912149177918205	0.926700237566205	0.868544016176775
CHEMBL1963742	0.498933968070194	0.679494254601112	0.472634815793957	0.561833941010101	0.565981846502871	0.470035746530447	0.509518299718382	0.483955659648722	0.420978125954953	0.523800971186006	0.510702309365552	0.435438187322297	0.520410244208793	0.632080262643792	0.452155487747981
CHEMBL1909212	0.13670116194626	0.0842127180947548	0.393719020550288	0.0620380858717573	0.0606615468029603	0.158561491538076	0.349823647032881	0.080427948162144	0.083756274636142	0.0421667753859535	0.273421101831021	0.0517152297099793	0.370809580513528	0.0469477250150282	0.231393674439847
CHEMBL2114916	0.914668001736046	0.896626984515355	0.910939880272025	0.973097748344514	0.964289313739871	0.977875138334134	0.955678749445385	0.952796421067995	0.958391935239637	0.976742520610001	0.96347878509865	0.968617536925412	0.966017590764534	0.958777106150477	0.967714617353784
CHEMBL1614499	0.699614476718883	0.717968716284713	0.770770674141909	0.749811873461924	0.767972261524051	0.721003595371778	0.735775767575795	0.77139020908116	0.704992159495246	0.723310488674775	0.749524705202639	0.744554515210039	0.730896921004409	0.775161671978695	0.696365590697251
CHEMBL1613870	0.850612826619268	0.901033954311285	0.867932889945407	0.83321178387246	0.915129916135135	0.827679794753394	0.822984989444379	0.896083518624955	0.833440858808464	0.82770775867719	0.921578946901134	0.84242455211719	0.828544655279478	0.906053477284933	0.831449300226129
CHEMBL1614019	0.946368225174349	0.854321583625975	0.88474887924983	0.956503353419076	0.89073614927315	0.901004406055469	0.939134748649686	0.899479659706788	0.912235851679945	0.95440274916564	0.885295893670787	0.896788379898231	0.940763851421571	0.870305959315953	0.926554390789696
CHEMBL3215183	0.953842078004862	0.945342840595947	0.9556108604478	0.956256682349085	0.959230021073644	0.967513797842329	0.953057402532616	0.949310270674525	0.956658847294309	0.951668526443028	0.932748936981927	0.961795082337873	0.952740008566714	0.958956926220918	0.968094284230348
CHEMBL1963782	0.517419748985807	0.45042086828971	0.499163958301967	0.482729754731424	0.537435160038508	0.584441340720845	0.528632843503702	0.490113555102631	0.527371712610595	0.473312483899316	0.47672586727716	0.491733485990727	0.547691198204094	0.467276062930741	0.499211534181901
CHEMBL1614169	0.177703223567846	0.0607314896114051	0.0586373094840727	0.533631078893821	0.351503486060373	0.344100716066566	0.471397403498873	0.416376226997535	0.0246910564985337	0.545557522891323	0.428339340151658	0.344413928685296	0.578914642775861	0.420273552035171	0.0511788289344674
CHEMBL2114734	0.992151566614782	0.991688402930828	0.997716298313049	0.991493235037822	0.994120155401048	0.998100700163328	0.996037380019725	0.996134664562599	0.996106050515941	0.993476424218131	0.995032530626391	0.99830213985743	0.995565878871579	0.994355173290122	0.993996809668213
CHEMBL1963814	0.776213772478503	0.775813839672986	0.672273743866969	0.782860930988879	0.801229277776107	0.704423618272862	0.789984119950311	0.768901247592011	0.727055047569815	0.779857730316755	0.760246094811488	0.671540829073078	0.781746876359447	0.806592054693568	0.727738281799036
CHEMBL1963999	0.992747625075459	0.978034307494789	0.996284790226746	0.987720458285301	0.984997577209752	0.997643437950333	0.990057597270156	0.978631798861722	0.996063781284841	0.987133813425355	0.97573178015492	0.995389885954774	0.988029039449814	0.978192706437037	0.997722909214049
CHEMBL2114716	0.957958309464292	0.94662111773043	0.959541893229544	0.982536385335869	0.95727759851131	0.982774978870435	0.974182991580663	0.964901207658635	0.976589199992992	0.977467685950956	0.945717306238866	0.982511049131654	0.972647851802184	0.962290383509981	0.980219936777496
CHEMBL1614529	0.872451598814121	0.866108718629776	0.916840984928672	0.914073410425489	0.900961787489866	0.888152921758579	0.885681354424384	0.90561881895867	0.893745834252331	0.888088871042511	0.891064958009008	0.885426949489465	0.883551068863395	0.911154580187936	0.893480585675428
CHEMBL3215004	0.831094795517696	0.85540315345699	0.837103580861614	0.856331686443871	0.878823557553048	0.845472347674778	0.829336672389249	0.858444510284181	0.834279918815841	0.800323033591874	0.809525234741772	0.8203149043672	0.827836517970976	0.846844102992818	0.821278036945817
CHEMBL2114714	0.473793178984204	0.356314941624568	0.483838003901969	0.534763243785977	0.430550724004984	0.486528748561061	0.515752992279181	0.405870620834878	0.468557450025559	0.561903205054529	0.424706783194349	0.477452591113335	0.49265087053371	0.402733305192489	0.503007479363914
CHEMBL1614122	0.643002902958909	0.682594081336812	0.730243370341286	0.678210342281601	0.728881375737138	0.773123763285817	0.665757893547618	0.733349313307971	0.780011261562143	0.661841195233074	0.744794920960062	0.744900095293556	0.665167428027078	0.734832305906572	0.781645362241192
CHEMBL1794366	0.321066948154583	0.32346689447862	0.299552860674924	0.337642303920465	0.332632251122772	0.366239258909874	0.31759632083176	0.316082297443748	0.31454170662627	0.309423727831728	0.345443725527094	0.346552692987532	0.34330413186123	0.350062637142221	0.316220990620615
CHEMBL1613944	0.917671139087018	0.852241083168851	0.84937526455913	0.944094217032308	0.902870057395932	0.916952989632918	0.926546607830776	0.900133673007751	0.893235059118703	0.93814320620403	0.904878715908002	0.892538276913402	0.923069296018836	0.918634790420964	0.893530383868748
CHEMBL1613896	0.52391263486378	0.508343366944948	0.512267321486026	0.530940104480424	0.587195996179666	0.593651434169921	0.539619370427666	0.557975836544494	0.593493697968865	0.511485715716841	0.586282932166816	0.587100025816064	0.547757729317417	0.558996799228735	0.609849543304103
CHEMBL1794523	0.360732433199365	0.260602809732226	0.26614930687055	0.28398011913457	0.259483685204437	0.254893089678146	0.273967697988523	0.266218550246681	0.253930717668828	0.312080478843748	0.252857943157087	0.259384276386306	0.267670834908487	0.265855341979654	0.269895808674744
CHEMBL1794349	0.801633443090447	0.811845068896842	0.802697366535638	0.877645835379468	0.839418432235717	0.847595254278672	0.840470264493955	0.835567512026457	0.809859954171827	0.848852070475656	0.815367489002026	0.808495137992565	0.842453903547548	0.836449130691667	0.829896371101119
CHEMBL1963736	0.46632458744527	0.708834904980231	0.447470098341655	0.469014977975993	0.671508727076704	0.364270516107612	0.477091815821803	0.631014658651363	0.36878888626631	0.388190716809239	0.572767713269095	0.324516369865974	0.442043218205582	0.659877583213303	0.389354386999324
CHEMBL1963835	0.746670003808158	0.805779014320859	0.650910319026205	0.756878290818673	0.840960580705333	0.68219961204249	0.727628593819368	0.7423415824477	0.635091998559018	0.754368438933186	0.82023964423811	0.677780781076939	0.717547435359747	0.796694047821653	0.630160787389846
CHEMBL1614217	0.0841908357571383	0.101095663234871	0.127564645264079	0.166840833699765	0.186963724079632	0.205396176132335	0.116789941868695	0.137190885315228	0.137905635648554	0.188345496753436	0.188275797595156	0.175799022693262	0.113005695133622	0.151755853417647	0.141790073039131
CHEMBL1963727	0.827890164133224	0.65534675656213	0.573051419961855	0.745546838521203	0.622192131639003	0.637549761290349	0.677553197659424	0.595090379033143	0.631176714353013	0.699879912885204	0.620001291595168	0.592011821432438	0.66645930953251	0.60655164626209	0.661172257709667
CHEMBL1613820	0.8134884113423	0.826802821624105	0.829136441033482	0.831084886677184	0.872512925148205	0.882802601853081	0.863041348158653	0.838814475045593	0.869548052149003	0.813790571222445	0.860701864743786	0.869921117268566	0.851461782692926	0.857340442903723	0.864757968992009
CHEMBL1614195	0.776566282823804	0.804736694653055	0.834784522311498	0.804880295492894	0.864717328891232	0.868223633293722	0.790966801203151	0.801913137671095	0.830944274523755	0.824111926274997	0.853516091835527	0.859348177566707	0.792874955495747	0.824788961778156	0.833158066727836
CHEMBL1614339	0.434071365471521	0.392358530118411	0.546402592542488	0.52414248540789	0.493522995565667	0.599177094355766	0.480358720508039	0.445525825358948	0.610887668630214	0.50523598437616	0.50526017405325	0.527458262438277	0.50795015569804	0.477651365691376	0.583673968793008
CHEMBL3214953	0.811845680484713	0.829334339289206	0.877959361757853	0.886369698603698	0.914859848063539	0.918996934486438	0.827943252848101	0.876991243502279	0.914309156501617	0.866910467412593	0.896632144041555	0.924985404788302	0.851201950225409	0.88708402540031	0.921601389893255
CHEMBL3214811	0.586110785518942	0.556665122591917	0.479089923501624	0.656384421221514	0.603852061385095	0.612378861768556	0.606271771645556	0.54029847207229	0.521366945715089	0.60777926942517	0.578339621448985	0.501950084356385	0.579470046196166	0.590474629655333	0.521020065633071
CHEMBL1266185	0.138973434184176	0.214868249991602	0.174790967076692	0.18596647811859	0.195729983779043	0.150454145246417	0.188464534467868	0.147384859218704	0.205678743400274	0.137952826569949	0.20158326159794	0.113150757427341	0.189978484301825	0.199079679489845	0.192912603230596
CHEMBL1613924	0.850966970384852	0.810030875081056	0.849987563427552	0.855046540249554	0.839263292064009	0.868787170008189	0.831888550677138	0.849661835733271	0.825966170190799	0.817877378110968	0.827981387370867	0.843020091198257	0.843259768500725	0.846938179393096	0.82648657396308
CHEMBL3215079	0.506889216224054	0.420685397668778	0.473934137490514	0.669885812620171	0.542375868810009	0.56544181322907	0.513307304392221	0.445905476397065	0.515816724661184	0.651247735413123	0.465208597503675	0.52473380623663	0.574909045741647	0.511606671452103	0.540062330707517
CHEMBL1614192	0.747737692568028	0.786767877197908	0.750794961103174	0.871633033699948	0.871026909101025	0.850532312540132	0.821766790596883	0.80966711222455	0.765832673003387	0.839654227016847	0.826597289406538	0.805956437701043	0.831275555278927	0.804013802925004	0.796809738125847
CHEMBL1614285	0.805872742689077	0.848254682338712	0.772803848439168	0.874734495767664	0.877946908224731	0.828322479274727	0.855255955938093	0.855803147088837	0.794170323638719	0.861128917744213	0.854814882711303	0.829708104695957	0.851462169274001	0.842667342846884	0.820237671805324
CHEMBL1614121	0.747993667011487	0.658603312768671	0.697799868016728	0.72715422781764	0.69342250914318	0.703117029656364	0.732322230637133	0.694697265406055	0.713484458057815	0.748612801215714	0.715303823328974	0.66201283813459	0.739312221693827	0.716455960740765	0.704456122164288
CHEMBL1614155	0.864170096570047	0.83920443349103	0.862200335809514	0.907009168377044	0.878210925053768	0.842334155638547	0.881533185280801	0.833959929581037	0.83168667217085	0.881365133286643	0.874802564743206	0.826576807998547	0.874390696958637	0.852529041667465	0.836771745032881
CHEMBL1614201	0.724704992898999	0.748287715994591	0.749961887823516	0.819070321185079	0.794127018716229	0.789054192197779	0.782933127005786	0.740781736697842	0.717147429745209	0.785237038084284	0.791484085710939	0.763257685548121	0.785010756722258	0.789872369649537	0.747851670058778
CHEMBL1963790	0.77220983066163	0.72187299308511	0.727237553530536	0.802279281635001	0.796749332938964	0.767413104424737	0.801718142864756	0.668661093933155	0.728182462334556	0.784312971505468	0.739641416225496	0.719385766458512	0.811788982027903	0.746308146193834	0.780747025182339
CHEMBL1738132	0.29471017628039	0.446797143717476	0.350068361260904	0.441204644478556	0.533171557948023	0.461076705161929	0.397206244058388	0.437087943278237	0.433152613909401	0.445758996602433	0.463295946643764	0.468595077680731	0.431902166220417	0.466894219304679	0.398706800744298
CHEMBL1613794	0.413722211951726	0.283358533118938	0.399672977528357	0.504333258113976	0.434448935611627	0.402338387761516	0.44192536439507	0.364479900511746	0.358505887450886	0.471002675372408	0.370926210536859	0.379897985078729	0.458539844490826	0.349263922697595	0.37426652193517
CHEMBL1614067	0.747205969263739	0.706110951156292	0.696014561741922	0.777521449416108	0.721998297811968	0.715907745188709	0.764754027735432	0.732660362643549	0.731657992336795	0.809064880082865	0.714885961116745	0.754706841158475	0.780730125565766	0.74613458033494	0.743853838219066
CHEMBL1963888	0.476915123416402	0.489250918845275	0.536578841896024	0.598926817484529	0.537685992776301	0.619220203503331	0.523636142969419	0.485141362529315	0.582978614117774	0.509652198113492	0.479236905371157	0.568037126742922	0.561178020247217	0.550118585823419	0.570511523563482
CHEMBL3214967	0.707630063791372	0.733626267697228	0.674743486007636	0.831999690313814	0.832069384058606	0.807170511788676	0.780806639743482	0.795711266846363	0.730546078017599	0.790136538640509	0.784745122871428	0.7993686580967	0.820068032674001	0.814218999397655	0.745880051249119
CHEMBL3215169	0.896544031392627	0.861612230105919	0.887223067000237	0.933708620067509	0.907196180458336	0.918116503296164	0.87781434242215	0.883459554795381	0.902990241494796	0.885345945458208	0.898306323516549	0.898432159432846	0.883853121036401	0.888871457884945	0.912709436450046
CHEMBL1738573	0.978796606268295	0.995058810689444	0.995387403042019	0.990614414154841	0.992059167161715	0.993989983086974	0.983197348129502	0.994662618451508	0.990525228851544	0.992025584293212	0.992397183869788	0.989727585310339	0.985162665546375	0.994322582151377	0.991853746457184
CHEMBL1794310	0.0486457675300157	0.037892737332294	0.0307252976816632	0.0345500075105098	0.0390987367170633	0.0357151419975703	0.0369416037255625	0.0391235649092867	0.0302227831688286	0.109992531213083	0.0308753541073679	0.038101937146844	0.0401951121373642	0.0490151315950126	0.0292775367685885
CHEMBL1613779	0.733960881032056	0.663360716410885	0.353744378160372	0.749203381220796	0.751010649843203	0.462016098659798	0.734707990656935	0.745688805780615	0.400384196329273	0.790789112687279	0.743921399688749	0.477749931541286	0.736435736437739	0.745707588641124	0.441862197245421
CHEMBL1614501	0.986684605911807	0.970217506899896	0.979847638375275	0.982981269191287	0.97875798475188	0.980034091666301	0.986587152042457	0.969043617427105	0.975768288644812	0.985104193696676	0.974676016675176	0.972337645612665	0.987300455871232	0.971157121771296	0.968902059503854
CHEMBL3214913	0.866244178836262	0.895334920142121	0.915210889209001	0.926847240749975	0.913375383529816	0.946667430874295	0.918254484727535	0.878688753319082	0.889203524364603	0.903565758265377	0.895546957944069	0.933517164351655	0.911884273736786	0.917617241689554	0.920823838999317
CHEMBL1614090	0.685970063003486	0.735998407029199	0.719822280420098	0.749065459595684	0.773921659910068	0.784514497294586	0.691261527454187	0.72633102247915	0.738807768570299	0.689809324102903	0.750280371483116	0.77692788510047	0.694607198919833	0.745684076001516	0.742283806672541
CHEMBL2114796	0.950948397290668	0.942800836439714	0.940087814563657	0.969711641342007	0.971864216727	0.966591755180916	0.957852063824641	0.962639548394989	0.957059653101251	0.973024441896606	0.966101141732975	0.963218635722721	0.962566513921943	0.974962112412819	0.95986340107076
CHEMBL1614554	0.340175555437369	0.371409651277049	0.41111985097807	0.388802474305002	0.474050496343974	0.574043906631527	0.331011672869982	0.404210695416668	0.494366467813578	0.381355783508521	0.497453929234236	0.506185079006009	0.339299614672455	0.434332224358763	0.500245671014149
CHEMBL1614456	0.983538768008457	0.973176971644688	0.978692379144521	0.983792389673021	0.986040606597376	0.958099522504364	0.960893585083959	0.980351055797273	0.95882426991847	0.976354490254358	0.981709087788643	0.946391425792555	0.959269545076655	0.984963468540264	0.959711338001123
CHEMBL3215073	0.556379977634721	0.474996644130496	0.503955409687343	0.512905147572084	0.556807358297352	0.575680041843588	0.508168552550166	0.453103880540785	0.527145877763143	0.440257303539494	0.401938308680274	0.444855427416562	0.513091346903343	0.478038198018185	0.563542690756555
CHEMBL1613936	0.883457417695735	0.890845076790894	0.923158493879346	0.924930380461272	0.919202841692243	0.919772016821526	0.891910031427159	0.904478672963823	0.920011282629889	0.902843168941883	0.904879935308305	0.930276967731223	0.893788844070083	0.930735344681718	0.926210687650002
CHEMBL1613803	0.984913217889982	0.976303689134432	0.98116557034331	0.980710798097985	0.986794738400596	0.963546722779917	0.967529236289856	0.98299480177576	0.967319066353888	0.97750438812245	0.982737590265658	0.955390674829513	0.962900018451505	0.98486329746288	0.961491158958988
CHEMBL1738598	0.70894829525723	0.681317775493177	0.684733003681969	0.787745664604226	0.709948874598956	0.734332675064993	0.734386987682954	0.732203137050609	0.643634695011225	0.757789056395565	0.708394861835385	0.689674932043194	0.729488251241705	0.721193554476236	0.672089170891771
CHEMBL1737993	0.984744919742717	0.990842397397041	0.996838488514553	0.987016156457927	0.99545704425179	0.99666599260587	0.98200161495054	0.9914535904375	0.997760428470299	0.987140165156683	0.99212237898628	0.995291441136082	0.980775384090908	0.993578560259802	0.996102131002352
CHEMBL1614027	0.800237734093515	0.890334858362522	0.846457529680591	0.836509799019215	0.912605719346141	0.881268589135861	0.81552680981373	0.900093201808621	0.874257317510491	0.777856598997732	0.90059879812725	0.870129164111813	0.812791996674315	0.905226343179511	0.881016105952614
CHEMBL1613792	0.516585242221528	0.528158358924155	0.518669817136854	0.730956715682382	0.704581629978691	0.706507144291338	0.543765012093791	0.63062010804253	0.642668236362226	0.694358137667704	0.704188806915999	0.70089455821856	0.588865220019515	0.672447060548261	0.653209857775725
CHEMBL1614134	0.423534949543551	0.44653154597104	0.387823426761718	0.569397774341421	0.614965349664426	0.544111221495585	0.520861960480889	0.529733529012795	0.538552925609908	0.538129061560723	0.564702605694857	0.451910331677911	0.532051976901991	0.579799463205535	0.546056482287829
CHEMBL1614158	0.617659098904239	0.6301001929287	0.384161548714404	0.602003120089242	0.666362675850413	0.45958232495751	0.662102040113453	0.583798349777792	0.500218869552771	0.666152865561513	0.692782361338782	0.507465678628235	0.626143119792619	0.708734308524111	0.566317284658347
CHEMBL1794496	0.983122005300489	0.982503334214079	0.984512470703393	0.990114420772796	0.991307102420699	0.991825513998139	0.989350470667035	0.990812104960666	0.991663889050918	0.989012198956127	0.986257051605428	0.994178697229212	0.991976852581296	0.992124071958595	0.990050582804771
CHEMBL1794512	0.740190089537718	0.732562246842533	0.802752085737731	0.856323360214009	0.845480351487716	0.855938911718902	0.769228891121623	0.744616045508051	0.805178638407942	0.827062040905493	0.824675741304761	0.83133673251906	0.795148087169761	0.786218381927164	0.821087615804707
CHEMBL1614120	0.0014128480428006	0.000737463126843658	0.0013262599469496	0.0385915329880847	0.0032258064516129	0.00925925925925926	0.00705484377522417	0.0119047619047619	0.25	0.0755066545674531	0.01	0.0263157894736842	0.0073089907604833	0.00684931506849315	0.166666666666667
CHEMBL1794324	0.832764066270211	0.890024483312215	0.865264061136506	0.93090710186988	0.930804586856516	0.917199621524047	0.917785282521024	0.917808314506185	0.894520998271506	0.924319210041088	0.923201024899657	0.917839329636892	0.918199058869611	0.911024859371163	0.898037497656975
CHEMBL1613869	0.725242708897341	0.715666509851116	0.741326366758948	0.765516770221899	0.76805308420158	0.716438070518186	0.701832724101404	0.717135690787691	0.725233313084425	0.751000198728265	0.741449136418959	0.738775133285686	0.711777602307474	0.729070304066674	0.725107326411209
CHEMBL1040693	0.316407117170249	0.394551313692892	0.19750560290454	0.340973356809105	0.26829564657373	0.315069351412436	0.302544819082152	0.257796093076146	0.227980510925701	0.310135127718641	0.224404607266523	0.198904722860429	0.329758202911534	0.410237566858617	0.233523217259546
CHEMBL3215046	0.726950621808366	0.724616380752232	0.747469702179494	0.794425709457595	0.784413237735775	0.786916391277144	0.703429810293958	0.679554359764043	0.694848666851131	0.735591722615992	0.700187938919462	0.727407645638177	0.731811615974354	0.717344506053397	0.741728523331041
CHEMBL1963988	0.365296960447368	0.330731909254449	0.410217128424535	0.534008301458937	0.468711900188125	0.552668449948316	0.46364542656377	0.450142535643263	0.433608984295844	0.466929085308658	0.442337524640378	0.51450745068075	0.483850558883473	0.463156606003263	0.464122454438476
CHEMBL2114924	0.0870284816961629	0.120802508009615	0.326514101402784	0.264214349699086	0.426172465979541	0.426009859178631	0.197370757990899	0.164135686476078	0.40709928073768	0.295425157539141	0.317678479716456	0.279126725748843	0.209232330845719	0.148758493177487	0.349126830876515
CHEMBL1794426	0.923229926219219	0.95403305794299	0.932573970099268	0.970186331567818	0.963854491659773	0.962795804068535	0.961539800210154	0.972721126062764	0.962319951897237	0.96478061047736	0.966932452682056	0.951415706691919	0.96101320578677	0.965368203018437	0.958164769620695
CHEMBL1614164	0.747753059201614	0.769214871429966	0.716546293290096	0.818629390170554	0.834992421340453	0.76902062003793	0.78980815914863	0.80510305388898	0.736723634313567	0.779011899192192	0.816242865578172	0.774076140447265	0.793384027890011	0.801319739870112	0.744514314681939
CHEMBL3214845	0.828706707195294	0.774896336896045	0.837365057345452	0.881407849797776	0.834398148897634	0.87256873153543	0.813964590739745	0.820102832233725	0.831466754217827	0.84459154213549	0.766659366340989	0.852868259166577	0.840077699308077	0.85212313080627	0.856917722626628
CHEMBL1614252	0.555984668749882	0.571338222981048	0.536824873752597	0.613905766933582	0.663778533974846	0.66310103067479	0.668789565235902	0.637481378873049	0.587072289480555	0.626712038145223	0.653200739638813	0.649962912341733	0.661084044104782	0.660006634775642	0.625150955159357
CHEMBL1614064	0.977037922254105	0.971945464703186	0.980892007188875	0.989427608461719	0.979409147641618	0.99079205239293	0.983817154084497	0.980713815493835	0.987194619594925	0.988263708215665	0.977520562541373	0.98314568288946	0.985112732796501	0.982421685421553	0.988480207869294
CHEMBL1614213	0.77193076828303	0.758632624106781	0.761872972236897	0.777372192325963	0.753445843298888	0.765360750470892	0.797269085260619	0.761680451449315	0.77648736803111	0.769129443219642	0.76390009220219	0.769844317633575	0.808177377904371	0.768125548006731	0.769405192653671
CHEMBL1614307	0.995060123581629	0.991969283860171	0.993545775211518	0.99731802626066	0.991647969022505	0.9953783577672	0.998077754554388	0.992633385080165	0.99532802077652	0.99682331136302	0.993062832112772	0.993912492032147	0.998128685578452	0.994078822464198	0.995582074080569
CHEMBL1613797	0.754105243275289	0.748042283564692	0.75652938596468	0.769912778440223	0.770288333463463	0.775531989639128	0.764862389794891	0.738355811742789	0.76078511509257	0.735153724428747	0.774871010415609	0.755926900563561	0.749462565508581	0.745680112331351	0.759438242165314
CHEMBL1614110	0.83960983508824	0.854490231524903	0.888595919016475	0.882814009811869	0.898067541036598	0.911419552829634	0.843181095031083	0.874106364996733	0.901051428698662	0.85990751964812	0.889261775119565	0.899214763593004	0.855065277149906	0.894785442397048	0.901699569356317
CHEMBL1794536	0.983413296659937	0.985319100270142	0.985127934013365	0.993248812515114	0.988013814414903	0.990507224957944	0.990771858690741	0.993761546663315	0.98915064101016	0.991879277162654	0.991830218872095	0.987910274546719	0.990730438423253	0.992640361140587	0.98907726962627
CHEMBL1614141	0.520145821147918	0.594454274723365	0.53765082528335	0.561175245406512	0.663178307151725	0.624103175064835	0.57487502590025	0.656157337467051	0.595207729459219	0.503467248671431	0.577216399484093	0.562184283123166	0.541631610084855	0.689461975934202	0.593806222823732
CHEMBL1614153	0.501101358704663	0.444176736578295	0.48359393829071	0.557638118022661	0.534925894452094	0.514965101403555	0.534661103201189	0.486651233105791	0.467578968963224	0.547617855642235	0.5428055023851	0.485907608185164	0.555680566248849	0.514231984069511	0.492540748513556
CHEMBL3215270	0.847436464815253	0.819315736110945	0.853216199900364	0.944303013441549	0.899675558581342	0.930000460431911	0.895642227416534	0.816665005394457	0.892034308585137	0.921597668669442	0.848791439012132	0.901422898655067	0.907592094851165	0.854926386653355	0.909340862244149
CHEMBL1614137	0.773584054197735	0.817392572720584	0.769325546809103	0.831595774509993	0.833653827546178	0.799706946227124	0.791138072465463	0.762363044157459	0.775587265213391	0.76278760025474	0.817879767655037	0.815765450838509	0.791691121063048	0.78763809678678	0.786323203521581
CHEMBL1613777	0.893049591973786	0.895652647099043	0.915778042266096	0.913507645099119	0.918066122499413	0.932867054408747	0.896297599756261	0.899711666040617	0.92873026390787	0.879037941298032	0.899793320979665	0.912748622728748	0.911174253334729	0.906577178414667	0.930478777825724
CHEMBL1738569	0.969996405937652	0.983183994455457	0.98655484808838	0.975735336240362	0.982561032864653	0.992561566859961	0.968399431260761	0.978590671332663	0.989149253844659	0.972542837122381	0.983240840567016	0.990038564013763	0.964333332417013	0.982406183002711	0.988586816775896
CHEMBL1614538	0.83235446202406	0.823206810306332	0.819821978316423	0.863217005652588	0.870099908459433	0.874949841347929	0.846163373733141	0.833104163041586	0.841680417758965	0.843475395132103	0.864780160602415	0.856438461122733	0.850107784285254	0.860455172990221	0.853428311159474
CHEMBL1614166	0.205696766816849	0.288053788953329	0.311263009107496	0.34268170346778	0.475271812076011	0.454482647196045	0.36289695916087	0.510606848513849	0.486793479551363	0.34868350212478	0.304186405096356	0.349405348001759	0.420050580702721	0.305150272577833	0.494342063631409
CHEMBL1614263	0.403605050598234	0.427027214375288	0.429554450745625	0.524360203010351	0.547037387458958	0.52479226594993	0.47871228674629	0.501522855053076	0.448605807824461	0.481561091535276	0.55362396104663	0.474493985358549	0.499101596793328	0.518860580822798	0.487804844068161
CHEMBL1613829	0.640892689924087	0.607342450628472	0.641615839008098	0.682066720271046	0.65923158805114	0.663887954297226	0.67962235357084	0.617635683050497	0.66027408363005	0.660339709465035	0.647294893002417	0.672866942953587	0.674283891767125	0.65100541265422	0.671220022362761
CHEMBL1613800	0.691065389323762	0.698826462092742	0.758189040892606	0.883134684947551	0.871613204464221	0.882698127925821	0.902426667113251	0.897224916131376	0.864111719919496	0.877051536830696	0.861810556697615	0.873502893605141	0.901858873042985	0.914836442480057	0.870630702072953
CHEMBL1614481	0.455486743360988	0.484062614205395	0.473455732731591	0.537335238370089	0.528419714567335	0.509308523824493	0.437013248492434	0.479008395510033	0.451721882513	0.516184946196859	0.507457783265842	0.502977413602684	0.444203595884966	0.512535387185831	0.483325209347201
CHEMBL1613776	0.642166405889714	0.619128579009793	0.622142337476807	0.653612549263683	0.618649566428889	0.660673495495521	0.674806103876388	0.644672498641571	0.622462833860255	0.632967933730825	0.615295800021118	0.657615879190835	0.679412153440266	0.645738036122226	0.634092654617801
CHEMBL1614240	0.603339060666391	0.595542234090466	0.667825781544944	0.691149044133872	0.664331837697374	0.730898151770578	0.6522651152621	0.647838100033331	0.719357198424656	0.671329207557923	0.670924923793116	0.718010850354528	0.68589267224307	0.670948091799057	0.731879967199181
CHEMBL1794486	0.897311197440522	0.87703410482107	0.897571229406976	0.96066993935771	0.94244121575552	0.939410382338823	0.930816382204153	0.930347190340559	0.939281875360439	0.949723490516856	0.928348641908178	0.917343603035925	0.940273085999504	0.940797951397621	0.945836548278184
CHEMBL1613970	0.208717378346447	0.143127984568548	0.155067297469061	0.381098438605731	0.338178904845724	0.217996597859857	0.254831368666334	0.229896045828765	0.190115635786916	0.230685951740611	0.238633262648702	0.159257424115154	0.294723326060602	0.2980879218908	0.220413308820002
CHEMBL1613886	0.93643645490155	0.939578785721891	0.939627556883478	0.965360145347308	0.973186935191461	0.962883824317655	0.958702140711665	0.966255370415476	0.956607266082331	0.961177279992865	0.959844356768194	0.956407474665751	0.963603297406409	0.966321273020574	0.956539102150741
CHEMBL1738606	0.497452708277221	0.530519627681306	0.540663330477165	0.71865526216202	0.668049502377028	0.642648098796036	0.549193539001524	0.613051498420706	0.59941791370949	0.6225670947491	0.629186593234919	0.600677860744878	0.577018232674129	0.653663219621479	0.626167140039975
CHEMBL2354282	0.262085114789492	0.292331100425148	0.328686335960262	0.415312380852487	0.522058332662142	0.439490673836446	0.309171886048313	0.39189828255556	0.309532090193212	0.353212186290935	0.474448151036273	0.416143329388097	0.307248576989915	0.418704268593889	0.368612400977913
CHEMBL1614331	0.121891856230449	0.203753295982653	0.134614248146506	0.105067434585607	0.119660538522367	0.0930684509503023	0.078712774898338	0.195247851795632	0.114099849206078	0.0755613950586462	0.207027097141403	0.163858657975784	0.0784798985674812	0.14776905333729	0.173405074479908
CHEMBL1614531	0.131815928807871	0.119653950501164	0.143450533265676	0.226771013461596	0.186273396353805	0.180194405465575	0.165002439499991	0.138721049375069	0.146614696138925	0.254143680197293	0.165424398295626	0.219117882347669	0.196587667020461	0.186966942683226	0.187236752136179
CHEMBL3215017	0.854407848761143	0.855937773919112	0.835680531439994	0.926162810054436	0.907372389631121	0.915921905406993	0.884842056967273	0.870273994202118	0.860230102348138	0.902505249769896	0.875643677803504	0.877526535864201	0.893137384825212	0.882926431612137	0.878970214691553
CHEMBL1613983	0.961516438559425	0.962430311699819	0.971153204015258	0.981282574961022	0.980017034452363	0.980545835467395	0.973565801055365	0.977523237958735	0.979252595175742	0.975207338177979	0.976399537673195	0.968052691661359	0.973251898251291	0.979659468803003	0.982408178378759
CHEMBL1613930	0.534737622704088	0.446149487875364	0.515026532404998	0.706352056488264	0.554089244118319	0.636598343449025	0.622043390193385	0.557120886397371	0.631794153100752	0.68464152758899	0.529379027905969	0.614007700007657	0.680841389851951	0.509172734402907	0.634174393130977
CHEMBL1738317	0.950553651890011	0.943511057348992	0.948572457426517	0.978143481292817	0.977282918807804	0.977757527346775	0.964796141424044	0.968957982323823	0.963665603798053	0.9690462661341	0.966461032492807	0.971107051027518	0.96765663065993	0.973414494471241	0.966105748707715
CHEMBL1614521	0.35082999736634	0.350933524090085	0.423040711285557	0.433421308171483	0.448229459625039	0.499760390323752	0.425998426318652	0.411428917288113	0.448249629620602	0.417119171790036	0.416948891223499	0.472916028841222	0.403332081039899	0.433752842401803	0.495853632349549
CHEMBL1614108	0.232078035504457	0.252406324197624	0.268813487060082	0.311429969162085	0.519496695583799	0.428658942824066	0.191442684239294	0.530147922816501	0.419803857877514	0.221103377823709	0.329304868929353	0.405837058131354	0.221972811973636	0.430674978752418	0.41859905203439
CHEMBL1614076	0.497420453469103	0.47829552876964	0.52718896907431	0.581143499170102	0.598376691320781	0.604927328309153	0.557099035139771	0.556731039743383	0.58147962832597	0.549175164112154	0.547073499294118	0.600105044517951	0.563137551876625	0.564397760481588	0.598967403468671
CHEMBL1614428	0.475564136826706	0.533299682241661	0.490139480660539	0.597203805247878	0.603787897073035	0.637698340440326	0.545872960464354	0.607328959862114	0.597024805274668	0.553752656981031	0.5895574890292	0.591514954433239	0.553344410523005	0.592149233659298	0.612161366227991
CHEMBL1614453	0.466972496076193	0.414173437249096	0.379881657587241	0.605205988899298	0.503720025209485	0.492529079515716	0.549787537217459	0.492901103637047	0.460544258335698	0.557674296819147	0.48437706816478	0.469198180137658	0.559546592896072	0.537712139689685	0.49308189438054
CHEMBL1794495	0.0105247064354511	0.0070240447751437	0.00662805344839045	0.0253684423883036	0.0364164444758942	0.0032597198164443	0.0131797522992832	0.0296115798831063	0.0130988258963075	0.0120931066898187	0.0492010935531917	0.00306314449631158	0.00561884383379491	0.0189844432061609	0.00849711752891234
CHEMBL2114817	0.59833455061912	0.609662838786264	0.556878403972332	0.739756607890458	0.723753334621596	0.705332437220885	0.652426600340021	0.692818050851249	0.686239021420994	0.640490786464786	0.650077098046777	0.667427467696254	0.667730851749	0.704591103790919	0.684967113899159
CHEMBL1794569	0.973752248210395	0.975792964424266	0.981756359862401	0.987933179899422	0.986493982413802	0.990712782570285	0.983407207536404	0.982408989598688	0.989750977783736	0.984311481753539	0.983416667372095	0.987816831776507	0.983805676292429	0.985284561945058	0.989531734476565
CHEMBL2114807	0.889235001561916	0.881712489319155	0.898113653733325	0.930268409196698	0.938787161509579	0.948264470641372	0.896652777543994	0.90217350769592	0.909925920125861	0.912146697482432	0.921573172378653	0.924958024068861	0.908423767631835	0.921097347344291	0.930832092338608
CHEMBL1614227	0.631371856061412	0.588909252494954	0.621884646047274	0.708998515678083	0.662765812614978	0.715536434150731	0.677194029160639	0.614017756400453	0.68463086094279	0.677265292783326	0.635619663631486	0.69275211117254	0.684373740383299	0.64010920673023	0.683321201972352
CHEMBL1613995	0.68745844894934	0.699844064399778	0.716846466014192	0.783059217876085	0.820866388250441	0.791439178077021	0.681583163222562	0.759590186379784	0.744003380149499	0.73207365459334	0.789583448520407	0.770973109914727	0.690450127934769	0.785470924212756	0.740030876010519
CHEMBL1614414	0.312289923162428	0.379242850283527	0.339764426546775	0.38739305572563	0.389167448288082	0.375429818291356	0.332859181035327	0.378065936961067	0.35592851445853	0.359514000919091	0.372498663377811	0.377383099132553	0.32790179931777	0.382591207683095	0.348527052162421
CHEMBL1613996	0.281207622257559	0.320153251963546	0.287525335055385	0.367019416328353	0.394395222318591	0.419800073776563	0.331443951380693	0.344390084424382	0.309992121736723	0.362023794137408	0.416581862305086	0.328816035800276	0.373822907426576	0.387870722516619	0.315893284870055
CHEMBL1613808	0.371436085104144	0.425434342691449	0.356514343458011	0.392779875666273	0.457877173362625	0.359451875982553	0.417951706790088	0.467491338823704	0.382079347629138	0.375193817364454	0.462266478388413	0.394060383415364	0.413585326170462	0.463694386439377	0.371741467702025
CHEMBL1794461	0.11038620053115	0.135550558212471	0.151752862889614	0.305691406255196	0.231785528468724	0.419838825217004	0.184917242615542	0.183898570645758	0.231919457739437	0.241161353262225	0.218194674496701	0.370002742098412	0.172745800018379	0.19667707957079	0.280338942699032
CHEMBL2114836	0.499877521565475	0.50649174967436	0.549354768953477	0.784452233680058	0.79167082048894	0.777504076937981	0.615662659011999	0.663824511561637	0.637670395388717	0.73012699041531	0.759265666767724	0.754808781587564	0.647859037125361	0.734448292275582	0.694960693138413
CHEMBL1614052	0.955194191827049	0.94844737770305	0.963238986806771	0.962987111469935	0.96164674029672	0.960318927878637	0.955898866031107	0.957291028313681	0.956424432875375	0.95187128416309	0.96142531826204	0.950219395159337	0.957246660391908	0.962586309198644	0.955167524296993
CHEMBL1614234	0.348164963714828	0.380389667081661	0.366143066801961	0.672619022659495	0.531478799217285	0.523469654858769	0.463831231126671	0.487050456242597	0.414417325342754	0.603702772451102	0.498920829944391	0.450666121066582	0.587070763362676	0.506023211420334	0.448819922904061
CHEMBL1613992	0.636598593825768	0.595953508655168	0.67204427324163	0.744939809756417	0.69665163448936	0.749938980457666	0.653195521693175	0.608821250291593	0.692852000102282	0.708509577537701	0.680820104384285	0.720672581183673	0.655660356444242	0.656554123913503	0.705089512568832
CHEMBL1614103	0.274806531724585	0.267494015945627	0.257310090124846	0.292182433322376	0.273501545648957	0.264066576370315	0.303342946919377	0.301841085361021	0.27585304725177	0.283882965232131	0.299651454143281	0.268157643412133	0.295045287805026	0.32370853932959	0.287738998298573
CHEMBL2114738	0.335548102058096	0.302866316450144	0.355965260380387	0.421163581851787	0.413209251107592	0.467582905718504	0.37090524748507	0.333837187889733	0.369029000305609	0.353761609694072	0.375670665635758	0.435998503800863	0.408226043452244	0.338621080054522	0.416256388098838
CHEMBL1794585	0.281293324284268	0.182623804878648	0.0281822365890738	0.715625805822227	0.261477414579321	0.0637386697041077	0.195191995484909	0.13929920805862	0.15928280965783	0.261952015835646	0.363900348023676	0.0755685628141102	0.155985948141697	0.122563671437384	0.0759517290768197
CHEMBL1614364	0.396375296218673	0.385802644804964	0.355151850780994	0.471675301075013	0.433511367608867	0.488513689217138	0.469459390593544	0.421495757360211	0.39115004529134	0.412982301199788	0.438564948554735	0.470338005078844	0.461119945524024	0.463203220414151	0.430153984626617
CHEMBL1794311	0.795785235591006	0.786202173611508	0.835985425112266	0.920284656516013	0.889285979611531	0.928233342230661	0.862768481305236	0.835531617122055	0.878399620702318	0.905064257926969	0.863043730500337	0.896036852400974	0.884764817767301	0.865857675681109	0.895989343589296
CHEMBL1963935	0.415907507952387	0.416832335099682	0.359132035656673	0.479780697890373	0.535672097677496	0.666622824185105	0.4532960236908	0.44764429414153	0.628143008835129	0.347669211437867	0.425952653897987	0.568232356577078	0.464794605277639	0.512668603648971	0.673059559303843
CHEMBL2114713	0.873073845151801	0.846745043969095	0.872996014640479	0.905517884420702	0.882568355185234	0.917468722144896	0.885929363366164	0.872906154311255	0.906066846525395	0.892537895319848	0.872896017736897	0.914464186785629	0.888419100679661	0.881171608652342	0.90334891765483
CHEMBL1614281	0.590270811269913	0.553883400598827	0.531243528769052	0.621690225029008	0.626811822962031	0.555545586350942	0.583641826419219	0.634165068288978	0.570913570317499	0.578281839764417	0.598778636678043	0.533333279324685	0.59076676570712	0.640181054837868	0.57392321953154
CHEMBL2114861	0.420569322864047	0.403573392625619	0.470614707371639	0.674988825979526	0.693408169640135	0.676456172808477	0.497529486357829	0.482865038114837	0.546014545601421	0.58657973775118	0.582775062435826	0.652140589400823	0.505520284459228	0.550682680778144	0.594360420137115
CHEMBL3215278	0.977472812663759	0.979599369104863	0.977972701121905	0.98964367355779	0.983734704051311	0.98648727763035	0.977472933369809	0.984423312723597	0.983130190454182	0.983232208484063	0.982643083915383	0.984112934329755	0.980303472750356	0.985528782251548	0.986068579052941
CHEMBL2114784	0.807482690425323	0.791865762121574	0.826410579878194	0.938858356525184	0.91736793044647	0.925890153540891	0.849311008835676	0.855728129353651	0.847961380601344	0.897245321373515	0.858349384754826	0.883126849768883	0.862913222753858	0.895106100836363	0.893240205375929
CHEMBL1614031	0.38432593815871	0.409012301374345	0.422835675654353	0.437795422440973	0.462132013696444	0.481124357075829	0.418699525474801	0.460867583710464	0.448496026697221	0.410513841403621	0.457452569858614	0.457439265309176	0.410085418846578	0.489185853246208	0.463065562946751
CHEMBL1614275	0.872365425528873	0.85148936590108	0.890682452240287	0.91511486647784	0.90978283244663	0.928577935418558	0.884526681227144	0.894123823338084	0.903978292799069	0.900117603939232	0.894766400493861	0.917833713685923	0.906598695066417	0.896467959497657	0.911718052173048
CHEMBL1794440	0.478817612450117	0.538103750750568	0.433688777888484	0.648995872729887	0.936274049097297	0.673353043790599	0.641750203146778	0.748768204287079	0.637135488957426	0.577758267042878	0.844044514178325	0.760862389622047	0.698004672105167	0.633344993829545	0.788692985715419
CHEMBL1964014	0.370747796175388	0.323150662905312	0.182491881348807	0.36188580381541	0.386099233531854	0.373233895247019	0.395809286155155	0.315700917132245	0.236494704664092	0.292880824367543	0.331566745816508	0.278870376503587	0.416035255078574	0.425342007061719	0.267707763119006
CHEMBL1613910	0.712530852552026	0.682358676553722	0.712070364894988	0.79466709362922	0.785749431567776	0.793551153224952	0.733566366734892	0.738078449406401	0.747037657205028	0.765886117392552	0.761842485407557	0.77811908201167	0.746188206504679	0.743939052595956	0.757584379467032
CHEMBL1963954	0.476494595347624	0.302731885442288	0.330050831829072	0.496935047103902	0.455461691357527	0.637468773362903	0.500846535612007	0.34270783530457	0.59408653243086	0.428791804284133	0.368266462893366	0.563185118170293	0.467087406028374	0.385460621777856	0.635064367454226
CHEMBL1964086	0.456102546360164	0.374098627760261	0.334345755867811	0.437774520950049	0.458756615717921	0.581280553328314	0.468226328031465	0.453978770856679	0.570605656303831	0.354941488709175	0.377483012518022	0.528455478898309	0.460631832268333	0.48216711130743	0.588176974945032
CHEMBL1964062	0.509998443580396	0.433150197010106	0.403874329484999	0.547699839431678	0.537882546978665	0.619326140014089	0.484081934176681	0.453712188179636	0.554876429060416	0.416238156735324	0.443031742194465	0.499734588827088	0.487453458127958	0.538799283945029	0.596779325183079
CHEMBL1963887	0.521845991195275	0.410974475593191	0.396698431716517	0.521341928660767	0.507837276130505	0.619296108936267	0.500273349250031	0.473710647585853	0.570457680800191	0.440376274163099	0.43142740307034	0.531312691715387	0.485136167657599	0.521181016788378	0.601270141204863
CHEMBL1614280	0.430239812443476	0.443862739059726	0.449974562692978	0.503858131084654	0.514764532919087	0.529123550357283	0.483560472032359	0.492843758299707	0.544658096802989	0.455740548230083	0.49262370780501	0.518184861454919	0.482688928702793	0.524479097777596	0.545240781241142
CHEMBL1963848	0.4743734578533	0.352986331845298	0.342398802060454	0.507765331409264	0.424882849448543	0.630766969711922	0.497449053060831	0.359240058198837	0.57262462888545	0.418338509420999	0.359740345437675	0.529436060327393	0.473195972894412	0.406637330969084	0.641499122918264
CHEMBL1963889	0.437359266496263	0.336084718209908	0.319743647181434	0.489830625068213	0.46974935092419	0.633658126195098	0.456787641817598	0.380902763818479	0.568223645105101	0.361407703964063	0.393889266961407	0.548842530256451	0.462165011871463	0.400151142677889	0.613080106287442
CHEMBL1741321	0.50500203339186	0.516354980197527	0.546907003429191	0.640286318178763	0.635939660220643	0.631081971970308	0.490107568743252	0.596648789058432	0.598469106294666	0.556895655420348	0.601260232725119	0.573497576728697	0.549236366629029	0.651012308976794	0.636303965894903
CHEMBL1614250	0.470216368569279	0.463771655873726	0.447038084486865	0.522208198191077	0.486893622215811	0.486034635666991	0.48148523948417	0.47166706557806	0.468080521311733	0.528624669032678	0.45889926939057	0.470439355876633	0.489773080543045	0.475353536458053	0.48206583346361
CHEMBL1614361	0.390315496707313	0.358346322539815	0.324730785888276	0.444282841315905	0.401258769851793	0.345235850493983	0.414650523329855	0.372766122861085	0.34941387764391	0.419046308253039	0.396012582649695	0.341006206902654	0.42448460634926	0.411828542167405	0.360109029159228
CHEMBL1741325	0.610553662265968	0.685900966320956	0.713123648978402	0.725674451569362	0.764783415653505	0.768827928278069	0.680529418443954	0.764800926536604	0.758877147812251	0.659757978605103	0.737653324105275	0.744977896571772	0.67529119859951	0.775388726523774	0.777628069862883
CHEMBL2354287	0.765879440008945	0.78684378077716	0.785130149404091	0.842882272310117	0.848129068591757	0.861052248649904	0.773533656964874	0.831168879577185	0.818165664827252	0.825090277874949	0.819631800294574	0.841260912621292	0.785632932857274	0.850065639724528	0.845816271101119
CHEMBL1614502	0.805027978084212	0.773199768504815	0.811936431638286	0.880725396379852	0.833453710088744	0.855866094030275	0.826655955638147	0.809469962944223	0.826091655026747	0.851753904635896	0.780432284256603	0.808036397544523	0.846063855312658	0.838281054445596	0.848616144502177
CHEMBL1614342	0.960043953193608	0.969220186769939	0.971211820984005	0.98182333437889	0.982430449758005	0.988866474051582	0.966765724375955	0.977413368760565	0.979586891539534	0.974957719931134	0.978227146423411	0.984976922451553	0.970910436177826	0.982259499025911	0.982849447084482
CHEMBL1741323	0.717113981956684	0.767276939907016	0.788269072419041	0.80330858727576	0.824956013087023	0.840331230078619	0.73713965415431	0.822394784723776	0.824411126814372	0.776474044998599	0.796218625143676	0.811886682192571	0.753059791551195	0.847149256093199	0.8468050069792
CHEMBL1963963	0.446460668725514	0.304444523104877	0.30923250468585	0.487720119176245	0.418816504213171	0.55529642029252	0.492334236156015	0.32644483190664	0.53355064682742	0.398546874221863	0.347826809018816	0.492301753208616	0.482226793918825	0.373617024127003	0.572034638508883
CHEMBL1794584	0.745719481569431	0.722413658340589	0.764951332216374	0.867170442053181	0.848067299529597	0.862539467352219	0.768722281379727	0.767964697875979	0.795520770951121	0.821523967369956	0.795226190409683	0.830450315118369	0.793484333173638	0.828686480873611	0.832000216743587
CHEMBL1613918	0.640338572391135	0.650272440009903	0.648235739276948	0.682438576843205	0.683273655952156	0.674868953448354	0.648188971796323	0.670852947445549	0.653586498272054	0.65229068882748	0.678209855161415	0.667270776834104	0.658745703288536	0.684564088515039	0.66833271791448
CHEMBL1741322	0.865784602337632	0.816292224629741	0.841573868374275	0.917770471297704	0.886451448845693	0.910306438311479	0.856590540364528	0.852511600003477	0.883215332509808	0.894155284851986	0.848917765332697	0.876773824032586	0.875311855010332	0.883520694524993	0.904980242004487
CHEMBL1964074	0.455733132512972	0.360541418532792	0.365175258385406	0.467347409202208	0.45602441671103	0.612208668780485	0.470948748321303	0.393658356879873	0.546425763051896	0.383734335886657	0.389749909667591	0.541864917647615	0.453979985656447	0.443226961504849	0.604324579478509
CHEMBL2114913	0.0194830421918071	0.0237283016813871	0.0237531987919379	0.027176562837847	0.0314982058506095	0.0468235205548568	0.0244977965620053	0.0257164546856952	0.031717826635398	0.0220140744429587	0.0263084242647906	0.0383335778421482	0.0246874944336887	0.0316870951879746	0.036385237152837
CHEMBL1741324	0.720019253247077	0.770348573833819	0.749837605769412	0.825540165526074	0.855661514801306	0.829234983952112	0.77900297403228	0.841191125739901	0.805975708816957	0.773161573013463	0.825323983035072	0.785809654793044	0.788439149127606	0.853938606978218	0.82774293305259
CHEMBL1614410	0.0761288644944689	0.0775394486245011	0.0660611217426779	0.0762689520892547	0.105131586429201	0.060695853184196	0.0787105736440833	0.0948330425739359	0.0674386050628246	0.0698768986455873	0.086964765201976	0.0676699456192966	0.0735111957300098	0.0749459983476388	0.0672114061946623
CHEMBL1613838	0.95762366917329	0.970169612140707	0.96775244984274	0.980297043850983	0.980315548924845	0.98464349933905	0.96656284011702	0.975256401872957	0.974125191473855	0.973619799322741	0.979867995426972	0.982827346302985	0.969696212769622	0.981887530667669	0.978146797077722
CHEMBL1794424	0.709725297986854	0.675929722178935	0.719451257498498	0.888386291913557	0.873858058927069	0.891288331608117	0.826410745929378	0.810294898808976	0.823107351909628	0.835031793333333	0.823603438229314	0.847047041552423	0.83735495665951	0.858610887128232	0.851070690034307
CHEMBL2114775	0.931899726957163	0.936430222360052	0.936312454447121	0.971615844967121	0.972300652353707	0.969484514709216	0.956044854681397	0.96231628505249	0.956125963655567	0.95047791512802	0.960629632665597	0.963288117872956	0.958952110706819	0.967338579776456	0.95902603112487
CHEMBL1614079	0.527125322002036	0.540211603716508	0.56691609306269	0.595168027607461	0.587124446844734	0.620564397926095	0.570423873653527	0.582134905080963	0.606302060867519	0.561125744161894	0.581176271363232	0.600701274035934	0.577492587791564	0.589743207383846	0.614997467545557
CHEMBL1614038	0.741162719294421	0.719960011425054	0.749629859108949	0.827699720090106	0.816911236636938	0.836636421203206	0.791118050637243	0.789467890694056	0.797365055462319	0.811244022239843	0.805708161897381	0.818395674286043	0.800076688904875	0.80660363291281	0.80746855746837
CHEMBL1737991	0.969456705618439	0.969017948579482	0.971568772078371	0.994298621767762	0.991601510189989	0.994989392987448	0.985672243346304	0.987663359914381	0.990437075267739	0.990285006488875	0.987242607768967	0.989033324756942	0.989129372029082	0.991617621034393	0.992686241706277
CHEMBL2114843	0.801928906652538	0.804680161523236	0.820410947907368	0.879792304399785	0.877644108237281	0.882519274423208	0.841933681837735	0.843527527381889	0.860613930432217	0.850449066210555	0.857664735631631	0.858922269222706	0.850796176091938	0.870563209203172	0.869279525757669
CHEMBL1614211	0.445463593360736	0.421173570684309	0.449362566793146	0.627206201763662	0.604213005605646	0.658012217347229	0.582325284554014	0.572622112022705	0.632999744379653	0.60601881511415	0.572495402266357	0.636344199677865	0.576150364941236	0.607130463561577	0.656964876436433
CHEMBL1964017	0.423726234692457	0.319082630265478	0.370196360261317	0.465880619705105	0.449846718896766	0.576296142837299	0.454621872141415	0.369531948959997	0.545997998225315	0.372737569164476	0.323189041936939	0.47458677176134	0.462463306589241	0.430898524578908	0.591042897815467
CHEMBL1964099	0.338375988032708	0.259403237989443	0.268213059389102	0.379030731716759	0.399962735665449	0.430038717122411	0.41258150704322	0.311187941248607	0.458354401131628	0.301603636001823	0.310983968911841	0.364128932327754	0.397732993311931	0.36818532691886	0.485809213887456
CHEMBL1963885	0.437781028018823	0.363178343205322	0.392931805359289	0.476874456045089	0.48071463373087	0.546018732655895	0.466780932726853	0.396720493505013	0.515912111141509	0.39850295100048	0.341558843496321	0.479347906045875	0.472800594024856	0.463541884072155	0.567736629979376
CHEMBL2114788	0.784681670636875	0.765676033055502	0.768792659318784	0.900276575391813	0.878834358653697	0.885258323998286	0.867037267129376	0.854044738579137	0.855366287902178	0.831916942229134	0.787251528488743	0.813799734978892	0.874523334879449	0.87971959854901	0.874014794846398
CHEMBL1613769	0.465478445670348	0.431899361560266	0.471818778420237	0.567886100927136	0.528809056990339	0.559678521759716	0.438699524766162	0.399427651101452	0.437029767088429	0.472860207361834	0.452714586879314	0.507971750517742	0.426394987928411	0.511057405361746	0.553413217449299
CHEMBL1613836	0.227180435354909	0.217516418752762	0.271758384943058	0.554869532624064	0.446075828471654	0.460039650065977	0.299531364928412	0.306538177011245	0.302941844040815	0.459909865625367	0.381167473382177	0.395181709485366	0.374640446671655	0.354321788238947	0.364654989878084
CHEMBL1614174	0.670944039693141	0.678976147490937	0.683071045339716	0.747690812128561	0.739488573170629	0.750613066249892	0.700045465107442	0.710341374514125	0.72422931067628	0.726102702127975	0.726639444996506	0.731987265525998	0.715049711617861	0.726241296537785	0.731428147700116
CHEMBL1963976	0.415014335277282	0.326262488230253	0.391856585105778	0.479372949370862	0.47156557824687	0.545045050842886	0.435102565626382	0.368957510596067	0.504008138937566	0.394841175437712	0.327215879948457	0.470828181921071	0.44397631262536	0.424012442992858	0.557920257052959
CHEMBL1963900	0.411687594391191	0.297849476136314	0.328075899680396	0.425780712279237	0.397340817135918	0.500475130412712	0.448631866830198	0.335021762651132	0.446357707980661	0.362459987287349	0.328652230948889	0.396802808004118	0.464308307108353	0.397913356013531	0.482375124238407
CHEMBL1738312	0.904235256059156	0.908845854123323	0.912540040331763	0.962910581182837	0.968678042475311	0.968019336436163	0.942441380111606	0.949193690457518	0.95317187552027	0.952488721486515	0.957646184336686	0.955520418867286	0.95103658951106	0.964097572428898	0.960046523887101
CHEMBL1614544	0.667546639501478	0.66859689946156	0.676654770913985	0.731077970707261	0.723065527127239	0.726372278445956	0.710419558668474	0.709476427214823	0.715059547494548	0.688455572988785	0.694507103467643	0.710993849958001	0.716116111417832	0.729548022466491	0.71759307016835
CHEMBL1794352	0.992858155530897	0.992967167132931	0.995025476451195	0.996722882420277	0.997054917375179	0.997376367931557	0.993380758453744	0.994835416412655	0.996660245829736	0.995452637361378	0.996233181521402	0.995806611952856	0.993847776214886	0.996297252011792	0.996660966424542
CHEMBL1963945	0.389558032677799	0.28260094386327	0.311208527665607	0.415182815577298	0.433684518882147	0.474115247029456	0.430390021044335	0.326521844916596	0.449239108629401	0.367989011765873	0.287644840987956	0.413550192516591	0.413418634361261	0.398177055978252	0.481979351452231
CHEMBL1964045	0.402813191960747	0.3367115313128	0.331675950920456	0.409875517818275	0.405447469657081	0.443221228615487	0.35067206292176	0.322560268817068	0.418126684533452	0.37945690305839	0.313775150744827	0.416027196284108	0.41240338879809	0.384251766335214	0.490960862028959
CHEMBL1964063	0.430457039004875	0.306492116472816	0.361924540246816	0.468464129246005	0.419716974491762	0.515293574598541	0.439235966973745	0.335237270793475	0.499003682336054	0.379142275216829	0.301569364847504	0.458425852114213	0.466017206237597	0.396708091403329	0.536370132662523
CHEMBL2114780	0.545166150369476	0.51521687783322	0.559543381656764	0.704069488651691	0.641736960298008	0.670659619683816	0.601505937307025	0.571939220729379	0.615690616926696	0.638359582102568	0.61939764563677	0.64065080312071	0.633330157281132	0.619500492379445	0.631619915764109
CHEMBL1614236	0.302519553499987	0.286410381592121	0.339309613180723	0.387696682933542	0.360410058180306	0.417389586208223	0.263113801759	0.269612219637848	0.304262162718437	0.310876598222466	0.286970415005639	0.364155410085657	0.276833711172283	0.37735103246817	0.397581704560533
CHEMBL1614161	0.619894207032335	0.622851153896101	0.623865156666792	0.717324067045207	0.709479661393698	0.723377104887151	0.655598269500686	0.658591825784426	0.662245627687528	0.68484529426414	0.681477701353713	0.695076485892081	0.669673829444254	0.686592566359125	0.67696773020833
CHEMBL1963882	0.480544387284678	0.395837303266835	0.410683403325044	0.531543006380355	0.511099743830322	0.588821372261567	0.482349874684213	0.423170416409071	0.522447332329422	0.465646435193402	0.38293209440233	0.4783727379318	0.496323694078233	0.50045564928802	0.56927490780771
CHEMBL1964034	0.404661504197322	0.29722424513016	0.295624567877132	0.43191746990097	0.42884247847156	0.485842140860028	0.449300075903351	0.336808350002322	0.472948987382509	0.356969716537492	0.3039437430082	0.435286396792662	0.458809916326419	0.401003289023285	0.524177218574254
CHEMBL1613914	0.445850811636395	0.414704702353616	0.45512172709664	0.537521722276655	0.525102905101513	0.543644326851286	0.496929154105726	0.503184470772216	0.532391978811444	0.504557879005323	0.504754087722738	0.527960118225934	0.519320068898426	0.520307673604586	0.5538116823935
CHEMBL1963921	0.412986502029589	0.343355275612288	0.383454389909713	0.475256038075016	0.47839684791915	0.540269840569986	0.438522545758137	0.384332055447641	0.504701390873337	0.396540868790134	0.339895242402665	0.471549713605958	0.453861981194059	0.432750336302098	0.555701652870162
CHEMBL1614441	0.690940832541868	0.67276579010501	0.695372692293244	0.777480770202515	0.75632289564949	0.76412718371382	0.726529076411929	0.71048781993925	0.712436393523987	0.744533464964765	0.74019640016009	0.750563736882879	0.739084318348738	0.739022589369584	0.728139068182901
CHEMBL3215181	0.465984738029591	0.456030779670518	0.518051313262827	0.748056335071379	0.642347478245916	0.756757203524453	0.589925092716498	0.589298999218914	0.710611450665061	0.675556840588447	0.52718889366654	0.666700267185325	0.632520476283982	0.627594100966307	0.74573265210695
CHEMBL1614257	0.352892118379126	0.328691061648739	0.355509396974246	0.418094183483345	0.403953271874608	0.399275309752281	0.328288293010106	0.376037234066844	0.381606973017805	0.344281122837091	0.356183518812702	0.356841044521313	0.340216417119451	0.393124731955024	0.40418070550209
CHEMBL1964009	0.402742785875998	0.297240948115926	0.33268715412332	0.424750491728764	0.408620006055674	0.502118089695539	0.433162631269656	0.316372563392629	0.498019327287146	0.364211357075457	0.31556829183771	0.429204413024812	0.429079184265369	0.390376104957168	0.521460126221874
CHEMBL1963991	0.369885477787676	0.283345423025291	0.310842917312757	0.368652401973424	0.36920117416873	0.446097892434516	0.369281959875824	0.340878569679077	0.454679309601617	0.313111012721393	0.309225726048348	0.376399574273323	0.398267027249873	0.387386312709531	0.505084428266061
CHEMBL1613842	0.617472980970524	0.612061745183778	0.61029007514426	0.7049657448196	0.700441147900635	0.71247300358317	0.640374357268086	0.647828836118293	0.642071946972862	0.657736500170505	0.664669505976963	0.679877608589784	0.644811162554	0.688278841724115	0.661530697123093
CHEMBL1964075	0.434182560367736	0.344617403807053	0.390183761211179	0.470783164397124	0.450193898922944	0.557942164212146	0.452409013019214	0.354895450482362	0.51776189826148	0.397393853954988	0.35271492753604	0.4918845686054	0.470179857719239	0.424426883783091	0.54679768746978
CHEMBL1963860	0.40239400637713	0.275733286304512	0.300406675313574	0.452525519775742	0.381234712218309	0.522946891816338	0.437905270379555	0.280693814766007	0.473099135494227	0.3581599214772	0.286640708873531	0.439236539567215	0.427090157027976	0.334544928621467	0.522848251968192
CHEMBL1964065	0.423089061118159	0.390007321390348	0.414041318768378	0.455435376285091	0.461808465480258	0.542249024546317	0.432841861947937	0.401693270724868	0.50831927973333	0.406939917640329	0.375398584477419	0.460787229206685	0.461845881758651	0.476538891652802	0.532308460877808
CHEMBL1964087	0.440934495577961	0.291393187621554	0.330507721395867	0.452600291339423	0.413301404781439	0.553879568983694	0.44617049529471	0.319067888977224	0.491921644621868	0.366279242621403	0.310398568833817	0.470488539114377	0.468285735141036	0.380475937235194	0.566923675574695
CHEMBL1963895	0.424384277457454	0.293738135094167	0.315404476042169	0.411832419515047	0.454295183765965	0.495656950703938	0.45439844751026	0.342385461128967	0.472990249486278	0.345443669311637	0.333740760786265	0.424532286418608	0.442306779927627	0.40813585481803	0.541709959011892
CHEMBL1964092	0.457856991167606	0.367480630935083	0.371369122880495	0.470344723938121	0.498026261064348	0.543284927890565	0.440114024679588	0.406585493288089	0.512629080007903	0.401084879475702	0.373046855358758	0.441937522449904	0.465111381271485	0.488366278918879	0.554749361851872
CHEMBL1963994	0.422915120762242	0.358108958388667	0.373826627511653	0.455868805867401	0.462003974004963	0.502987294707599	0.410134376628562	0.387226315723905	0.478197217329042	0.384647004394669	0.374564045004642	0.440058736891471	0.439196445670209	0.463253155941186	0.503363501508802
CHEMBL1964025	0.418962051596538	0.318587139323737	0.360434028750611	0.451237140455054	0.432593869086517	0.524312859780591	0.421045137438828	0.336080757427891	0.515541267024356	0.376679213370769	0.338332884803878	0.46751788190299	0.450301679468301	0.401896538888057	0.549622346029468
CHEMBL1964004	0.440111914076979	0.33332391294014	0.3521272366117	0.445237754562482	0.467941017414803	0.544557687896049	0.444192460111415	0.406249486496492	0.523329077775231	0.373945453505951	0.342800996672937	0.480624228079878	0.472659405290396	0.46821153170039	0.573617042872841
CHEMBL1963866	0.363069023433444	0.273780760630227	0.323354746188149	0.375021727442926	0.377363169628948	0.500027643045173	0.408006185727189	0.324858994755867	0.464394835501229	0.3195454679476	0.296633219774725	0.437271078031328	0.409806853522795	0.381995907115259	0.50687704287588
CHEMBL1963903	0.426490612642923	0.3442036254687	0.35389326902985	0.436542140618158	0.476521815599358	0.521391957099849	0.426851825229075	0.380078792833405	0.507891331115886	0.361911171657636	0.351677025642676	0.439473070758831	0.424887738220422	0.455493836275306	0.541576545292276
CHEMBL1964066	0.374895625486636	0.249311466232249	0.210892531042876	0.411252061120106	0.38056869622185	0.353388121827412	0.398177119779328	0.287759604904115	0.378663681500324	0.30401146556064	0.286914470448098	0.295024342872748	0.418309266115435	0.338036357627922	0.439102309187605
CHEMBL1964037	0.408901397022678	0.328929272065763	0.354090130807035	0.458396539138754	0.442567336068665	0.517628000882977	0.411934091855067	0.32039143008583	0.488089238757277	0.368830959302616	0.338157665454434	0.450499308835969	0.420383811508485	0.399819609520553	0.532387246560075
CHEMBL1964018	0.427734442708171	0.342741421324671	0.384494006153632	0.466507675356011	0.47811008043077	0.568545581587942	0.45418925708801	0.405366466485111	0.530082838730374	0.391350135384272	0.352365736597154	0.4825786174699	0.457334797892622	0.485098459281041	0.582466385610448
CHEMBL1963844	0.39389320427348	0.269524836345508	0.299173025342627	0.412486264817164	0.393786956014298	0.522020943056986	0.406073676990829	0.281534242429277	0.479905760585064	0.334436464011848	0.288422919621963	0.448875555655056	0.407930531620546	0.345824046926411	0.519476780293654
CHEMBL1964091	0.368372352440258	0.288707086763765	0.281619090364856	0.424010041080756	0.371894274430557	0.410110390692492	0.383672599119202	0.295736950484513	0.400944502899882	0.335731537853273	0.286617012366908	0.326536245677718	0.446362141654513	0.355785177253216	0.455619072790097
CHEMBL1964049	0.373422510476461	0.251582018676218	0.234125021364046	0.371390222291241	0.394528008503055	0.453138022404358	0.417852583624059	0.30121973856524	0.428355690568199	0.323283489814924	0.299635680318341	0.367763336682507	0.407234450830658	0.351602634554973	0.508237296536237
CHEMBL1963911	0.427062550105854	0.330621435473907	0.307017939192328	0.447478008183434	0.441855899388877	0.449802719691728	0.389703067955662	0.363661216980194	0.476864037924299	0.359363977201579	0.343606016987222	0.406724491139167	0.425938246505532	0.43630047954905	0.503547415042883
CHEMBL1964059	0.430802461758012	0.320024539885693	0.359652977512225	0.472494879070135	0.463786861075516	0.583140451635229	0.459447519961935	0.363085722308873	0.510455962467475	0.396929532475579	0.328409097471046	0.468361360255122	0.47248116553302	0.433101455054362	0.574840160840596
CHEMBL1963961	0.424952382280468	0.372770228488149	0.405404689649926	0.457723909330962	0.465877266599466	0.541726314170255	0.437830112881438	0.410418555486606	0.484834230405041	0.405534997744846	0.368295467813165	0.469453579569345	0.458316347125566	0.485291818658266	0.526538589495741
CHEMBL1964043	0.433236175333881	0.328650866694333	0.366219887383036	0.460517179003942	0.472503437888742	0.575528033048925	0.435872453725502	0.401095607172171	0.534993008013755	0.365724069069585	0.339748780537615	0.461661650654107	0.442823158188568	0.462646869607248	0.585293789665641
CHEMBL1964021	0.439804019211926	0.347322584340771	0.379899465701814	0.477484336382174	0.47278968852838	0.544938744178345	0.421954430356461	0.376968344074366	0.494956650527401	0.398594613074681	0.359314815160627	0.454288530050577	0.453981004935668	0.448949489314695	0.545215392706086
CHEMBL1964085	0.409219682783595	0.333764449049485	0.333397141202559	0.455491580467058	0.463773983552891	0.533805736732342	0.435038203891162	0.340519843562088	0.505898555963496	0.373933019661658	0.336249058964705	0.44693469491398	0.43914081213485	0.412845703551181	0.552841263695384
CHEMBL1963880	0.413371935155768	0.301365843801327	0.313939862025238	0.419163451493979	0.403418095860603	0.462792821213381	0.40229127222474	0.284069560630423	0.465233557584837	0.33640703703476	0.31909302501162	0.406299353820498	0.441296770784143	0.384130532578615	0.493018200385407
CHEMBL1964040	0.437017728843934	0.399469256330153	0.413109289637556	0.461775268709459	0.479674300010367	0.54841552735484	0.435530327205931	0.412593619423341	0.49709376419517	0.395317566588818	0.372965696448153	0.460764054600499	0.468948726220346	0.490120659571055	0.542201209521943
CHEMBL1964088	0.427242125218446	0.367951344355491	0.365603104715955	0.462550121159425	0.4522640226672	0.521949550709307	0.440131326854442	0.377788036637639	0.472456027831167	0.392445690004117	0.343402454886953	0.462690471426697	0.455978892390818	0.459075934806051	0.52526981919257
CHEMBL1964007	0.398215229678134	0.271932192263247	0.314042140100924	0.426831477374974	0.394017234369754	0.447611982858288	0.410540894278792	0.260163907950031	0.424639499739066	0.357447904071358	0.285307728203405	0.367030358166405	0.433866221618737	0.325164414487114	0.474756717701346
CHEMBL1964047	0.460167791752157	0.362118848672217	0.406797460819721	0.492559443668531	0.502909505367784	0.59111428077961	0.479948605066592	0.410090933105656	0.540629628754463	0.415727371701829	0.357807098614872	0.50020401701713	0.490529926868965	0.486931295497597	0.592379315328074
CHEMBL1963901	0.484718538050347	0.400007250259608	0.426499188067746	0.522473821760414	0.524950434757378	0.584193235229198	0.462908352045419	0.447255405903175	0.530095643788888	0.438266524577508	0.380050390049856	0.482186898294342	0.491758686344881	0.525924552132765	0.582692813606116
CHEMBL1614421	0.797463372841295	0.817729797351282	0.827492041734829	0.882604019011032	0.874716651974844	0.885741637995667	0.836710779072425	0.864012043183752	0.86529464964701	0.854845733517736	0.845722738142902	0.860290783555104	0.84664908853988	0.872185712741271	0.874637129825021
CHEMBL1963990	0.358989236077255	0.287665879692228	0.300425845084367	0.392511262941432	0.371623451019484	0.467074228376028	0.370077951685431	0.299827810066449	0.449801649975717	0.323882850061008	0.302420106176886	0.39499642574955	0.389929391983202	0.37603065444335	0.484659476936153
CHEMBL1963876	0.441954203504659	0.336801596769021	0.417179405168722	0.447100646461569	0.462184583626055	0.599614170635013	0.46410169522561	0.355657211500446	0.540802446708705	0.381198036348876	0.342477033707529	0.505777777612428	0.456677294277746	0.425125718178971	0.593830977008435
CHEMBL1963989	0.463531985108731	0.370738986364304	0.37648122958107	0.500975550759578	0.464534236419389	0.538092944680999	0.446805901494814	0.380220382077399	0.522429709003828	0.411003403865936	0.340593775282244	0.467099425268072	0.486474029248955	0.454347264336403	0.574039958643514
CHEMBL1614249	0.0635125801630127	0.0513737755507477	0.0408882383866491	0.0794867748050668	0.0868225666389194	0.0621948878849664	0.0536037663918083	0.0597637057724076	0.0453644441222987	0.0778636009069954	0.0756364254562918	0.0935654597697104	0.0561478071736248	0.051797984888183	0.0479485494810369
CHEMBL1963953	0.420863705888898	0.338095344817569	0.36878847816355	0.470325375258509	0.459474875633819	0.546260869969282	0.428350001464561	0.356331918901141	0.520273404373386	0.397320260653592	0.329184996075241	0.469241589656423	0.443779711822281	0.435234815756683	0.568930153584885
CHEMBL1963854	0.453436637954519	0.355657092944437	0.366995051605112	0.504868925092693	0.493365497650235	0.544427135738752	0.468693894314346	0.400620497018258	0.527824186005642	0.403524094949175	0.349038673767883	0.460201212245439	0.483264620417366	0.487042539200894	0.586213159276594
CHEMBL1963985	0.434268500334969	0.351635682014515	0.3701094632571	0.465566013362073	0.477342537668579	0.567356898598579	0.434658185693614	0.385155498626582	0.514151932738343	0.375558490993405	0.350205940585626	0.472221082700452	0.448744255950703	0.463209224735074	0.579905415584598
CHEMBL1964030	0.431853031734806	0.348972051705782	0.377004729279367	0.465070787312306	0.449608321822308	0.515693559175949	0.413808083500432	0.367284238229404	0.492199653281062	0.393043446734309	0.349790052842183	0.451144282189174	0.437541001741421	0.441223893203961	0.52299966620216
CHEMBL1963960	0.42594433955709	0.307067290856793	0.342058157545206	0.45614262336793	0.401749736643469	0.506459549386056	0.413739349138786	0.300793756397662	0.469291472580637	0.368302915619237	0.305495560149648	0.403525901162373	0.441141046335588	0.38450576923943	0.516213513196626
CHEMBL1963929	0.427023662317366	0.30107306682824	0.325405301992518	0.455603384675693	0.409600300209654	0.512494352205025	0.428324823816127	0.318275351227122	0.494882999735746	0.403299416168098	0.322136461664789	0.415625779992478	0.443255061582043	0.381511312019715	0.535968274873673
CHEMBL1964006	0.445758423337224	0.321065566341163	0.402533956119807	0.497258208339176	0.443737506043503	0.541311497505645	0.44763618710493	0.338618318291268	0.522605923540219	0.393282497533848	0.327676097907431	0.470721481693307	0.463416328044317	0.400168138715667	0.568071173708733
CHEMBL1963868	0.425198438803916	0.337674092102843	0.332964343370342	0.444049766402892	0.444923851810862	0.467677337990609	0.405508069444121	0.344518209135992	0.446358592784662	0.367635746291783	0.335814598902699	0.416130437234361	0.435252348314966	0.419542509797879	0.497025549890033
CHEMBL1963922	0.426876484010711	0.360152762178504	0.372797414601161	0.458620724462122	0.481150233616905	0.550121495740595	0.439042313885714	0.413046649446082	0.498003972058236	0.373991908972051	0.362600680650496	0.46945450961951	0.450863856960667	0.478972653873698	0.55539794275457
CHEMBL1964077	0.399042546780087	0.292180719455056	0.355461348107748	0.424355640182059	0.439773861734159	0.520729840876632	0.429658559861849	0.329864991252088	0.487511696692647	0.352301653877078	0.316197908077367	0.442849849216525	0.429237600883618	0.385203600021113	0.54686524602486
CHEMBL1964048	0.458888510819059	0.341865048508739	0.381060246488347	0.488706389085009	0.449260483915404	0.554097140269334	0.456339120293478	0.363229127489492	0.535754362727945	0.399329568094069	0.354969399272606	0.466076243038097	0.481959167033502	0.425933631824176	0.576677054260039
CHEMBL1964012	0.438533492998679	0.331030162788417	0.406181072004803	0.513274432295962	0.422871204822303	0.547657181520495	0.464257693939482	0.323459705147585	0.543604699214494	0.403386483480409	0.306988658427666	0.488330952265312	0.477748607355285	0.384084794843253	0.578386683280877
CHEMBL3215106	0.0161306637735036	0.0143444504098364	0.0311446058071335	0.0252067883025532	0.0217392913084402	0.020099460401161	0.0163727015969956	0.018254501710214	0.0231217917688628	0.0159176372635616	0.0160023996294643	0.0191378201638939	0.0173221176742366	0.0328833082251617	0.0214879781404713
CHEMBL1614087	0.851889024388291	0.849806794793847	0.854950255114004	0.89542382821803	0.892887337128563	0.891336997045335	0.872279922229639	0.882117953811709	0.87617365105329	0.873255660522318	0.888476531280401	0.88425958888409	0.875717478113783	0.891868005710357	0.881485063859215
CHEMBL2114810	0.0306927649602479	0.0333722046948058	0.0349822263324606	0.199042560963587	0.151807570102572	0.300405163041898	0.0950572297024187	0.115518569134666	0.183077618233061	0.179750620966761	0.0958401896143346	0.24326756995717	0.190227685388953	0.0907097647919606	0.186237528480014
CHEMBL1963874	0.46019204883734	0.337697429415694	0.391935790903133	0.479772442515065	0.468411671050563	0.541646751229406	0.437474040753045	0.372346826658813	0.52623531517776	0.401325793535489	0.361305189870751	0.474412950949859	0.461847131972889	0.443648094659719	0.571115204666472
CHEMBL1964072	0.460864642283156	0.367281321499375	0.411832693416148	0.5040487400742	0.481208195563575	0.551657333365999	0.460557567086124	0.380432382473432	0.530482929220904	0.424188843661182	0.350666905655447	0.488421506024543	0.486102390175539	0.452533858488562	0.576895027121707
CHEMBL1963981	0.465783823645281	0.342361775396382	0.400673474093147	0.485883704136214	0.472621429615609	0.583701514020117	0.467861384221042	0.386695366932082	0.540789388203634	0.376600010780832	0.340458052336909	0.483985349682085	0.47227509425761	0.464697733467286	0.603129292970929
CHEMBL2354254	0.995584007425054	0.994669281453299	0.995479747557996	0.997107016347633	0.997175032138297	0.997216356928688	0.996494415336777	0.996247362166675	0.995384488133185	0.995569941955339	0.995872044910825	0.995822217123642	0.996720650702465	0.997148896649644	0.996358681660999
CHEMBL1614530	0.445596081395033	0.436879638421424	0.447874807133558	0.473506949979227	0.476742744713186	0.48506621149334	0.466514609581638	0.451671431489851	0.468651329005006	0.458394079532235	0.467176263845231	0.4777153186131	0.463071797134011	0.461148638901471	0.47734439085903
CHEMBL1738442	0.912104217185536	0.910755380292107	0.919789922328358	0.964807673633492	0.957959898884274	0.962884744211735	0.940979989440411	0.942551292426382	0.945798108413854	0.953613415642757	0.945301646795261	0.952129903792434	0.948384943018672	0.955172053356459	0.951472389872992
CHEMBL1794553	0.140953942288858	0.152748691429522	0.17528231102398	0.241093045170083	0.211402706970336	0.239543992775572	0.15382275800627	0.163018254307069	0.195700668361142	0.18339044797839	0.184910687568861	0.218988116277932	0.180168241218103	0.204525506379692	0.224469179401261
CHEMBL1614458	0.473716179607072	0.476261575631646	0.503286362015461	0.599946231000271	0.580574213308933	0.597836541292609	0.526072160209845	0.528706527286522	0.536984340170182	0.567894511029791	0.554147151600778	0.563537460220216	0.546688205936192	0.558269865632164	0.550358707243627
CHEMBL2354221	0.997887033634013	0.998278269416368	0.998177013001575	0.998771538450436	0.998974286960855	0.999067360581001	0.998365785241632	0.998518439247896	0.998419096511722	0.998297841017917	0.998624883959156	0.99841831109042	0.998540062151656	0.998937670749841	0.99889112849919
CHEMBL1614459	0.942779047137134	0.951036372489917	0.944255041830167	0.947763840019973	0.949401761388675	0.947151633219877	0.951522311017237	0.953630510156637	0.953011388221212	0.945108801850831	0.950336319434804	0.945506121540477	0.952180612836087	0.950635313445081	0.951148160542815
CHEMBL1794345	0.510350875593167	0.494389135633693	0.528632594318308	0.596287319397546	0.575477426851693	0.61630415007699	0.537159561066674	0.540696344779178	0.569327649308401	0.526457900807877	0.534791209364875	0.566467813242846	0.565313770900191	0.567285893031444	0.587289909970425
CHEMBL1794580	0.732340162545348	0.734659934067253	0.749204206569761	0.848280474434199	0.852610160704812	0.862640576426468	0.783297992321242	0.809681816663823	0.80638664809044	0.791543204666418	0.786771965199254	0.813767542787575	0.808016650901563	0.847710323477966	0.832942085083392
CHEMBL1794401	0.434452032515954	0.42532050210948	0.467018659714635	0.725105554083806	0.706011994125247	0.743616055775219	0.574402711271048	0.604154505405856	0.622623675534875	0.646636646433116	0.600132621655067	0.630477713472803	0.634412213077156	0.694383764201062	0.69092661430431
CHEMBL1794483	0.322104704280623	0.314753494269635	0.37982550118125	0.533880807442196	0.480276427906997	0.576339978390396	0.433859487022911	0.426304652379916	0.493783983973212	0.482303522379471	0.413853877524576	0.506894888767949	0.445869148348431	0.472945415014646	0.519880321985412
