# Supplementary material for: Large-scale comparison of machine learning methods for drug target prediction on ChEMBL
Source: Royal Society of Chemistry journal article supplement (doi:10.1039/c8sc00148k), 2018-01-01
Supplement: c8sc00148k6.csv [file c8sc00148k6.csv]

	assay	qhtsassay	accQHTS	accQHTSCI	TN1	FN1	FP1	TP1	accCOMP	accCOMPCI	TN2	FN2	FP2	TP2	diff	sign	pval	manually	desc1	link1	desc2	link2
17	CHEMBL1909134	CHEMBL1613777	0.535211267605634	[0.4136,0.653]	25	0	33	13	0.947115384615385	[0.9198,0.9658]	392	21	1	2	0.411904117009751	1	1.95112040959236e-17	TRUE	DRUGMATRIX: CYP450, 2C19 enzyme inhibition (substrate: 3-Cyano-7-ethoxycoumarin)	https://www.ebi.ac.uk/chembl/assay/inspect/CHEMBL1613777	PUBCHEM_BIOASSAY: qHTS Assay for Inhibitors and Substrates of Cytochrome P450 2C19. (Class of assay: confirmatory) [Related pubchem assays: 410 ]	https://www.ebi.ac.uk/chembl/assay/inspect/CHEMBL1613777
21	CHEMBL1909200	CHEMBL1614521	0.555555555555556	[0.4012,0.7005]	24	2	18	1	0.981042654028436	[0.9615,0.9912]	412	7	1	2	0.42548709847288	1	9.57137375204058e-17	TRUE	DRUGMATRIX: Protein Serine/Threonine Kinase, ERK2 enzyme inhibition (substrate: Myelin Basic Protein)	https://www.ebi.ac.uk/chembl/assay/inspect/CHEMBL1614521	PUBCHEM_BIOASSAY: qHTS Assay for Inhibitors of the ERK Signaling Pathway using a Homogeneous Screening Assay; Stimulation with EGF. (Class of assay: confirmatory) [Related pubchem assays: 995 ]	https://www.ebi.ac.uk/chembl/assay/inspect/CHEMBL1614521
19	CHEMBL1909136	CHEMBL1614110	0.506329113924051	[0.3923,0.6197]	22	2	37	18	0.906474820143885	[0.8734,0.9319]	378	39	0	0	0.400145706219834	1	2.75956255830404e-15	TRUE	DRUGMATRIX: CYP450, 2D6 enzyme inhibition (substrate: 3-Cyano-7-ethoxycoumarin)	https://www.ebi.ac.uk/chembl/assay/inspect/CHEMBL1614110	PUBCHEM_BIOASSAY: qHTS Assay for Inhibitors and Substrates of Cytochrome P450 2D6. (Class of assay: confirmatory) [Related pubchem assays: 410 ]	https://www.ebi.ac.uk/chembl/assay/inspect/CHEMBL1614110
18	CHEMBL1909135	CHEMBL1614027	0.681159420289855	[0.5567,0.7853]	38	1	21	9	0.94811320754717	[0.9213,0.9664]	399	21	1	3	0.266953787257315	1	1.34725010158002e-09	TRUE	DRUGMATRIX: CYP450, 2C9 enzyme inhibition (substrate: 3-Cyano-7-ethoxycoumarin)	https://www.ebi.ac.uk/chembl/assay/inspect/CHEMBL1614027	PUBCHEM_BIOASSAY: qHTS Assay for Inhibitors and Substrates of Cytochrome P450 2C9. (Class of assay: confirmatory) [Related pubchem assays: 885, 884, 410 ]	https://www.ebi.ac.uk/chembl/assay/inspect/CHEMBL1614027
20	CHEMBL1909138	CHEMBL1614108	0.863157894736842	[0.8041,0.9071]	164	11	15	0	0.953995157384988	[0.9278,0.9713]	391	18	1	3	0.0908372626481457	1	0.000176315321162221	TRUE	DRUGMATRIX: CYP450, 3A4 enzyme inhibition (substrate: 7-Benzyloxy-4-(trifluoromethyl)-coumarin)	https://www.ebi.ac.uk/chembl/assay/inspect/CHEMBL1614108	PUBCHEM_BIOASSAY: qHTS Assay for Activators of Cytochrome P450 3A4. (Class of assay: confirmatory) [Related pubchem assays: 410 ]	https://www.ebi.ac.uk/chembl/assay/inspect/CHEMBL1614108
1	CHEMBL1614310	CHEMBL1614544	0.647058823529412	[0.5797,0.7092]	82	10	68	61	0.740740740740741	[0.657,0.8105]	96	34	1	4	0.0936819172113289	1	0.0782864847677644	TRUE	PUBCHEM_BIOASSAY: Validation of Assay for Modulators of Lamin A Splicing. (Class of assay: confirmatory)	https://www.ebi.ac.uk/chembl/assay/inspect/CHEMBL1614544	PUBCHEM_BIOASSAY: qHTS Assay for Modulators of Lamin A Splicing. (Class of assay: confirmatory)	https://www.ebi.ac.uk/chembl/assay/inspect/CHEMBL1614544
10	CHEMBL1737863	CHEMBL1614255	0.619047619047619	[0.3869,0.8105]	2	2	6	11	0.752688172043011	[0.6504,0.8337]	9	0	23	61	0.133640552995392	1	0.277158940901252	TRUE	PUBCHEM_BIOASSAY: Confirmation of compounds inhibiting phosphomannose isomerase (PMI) via a fluorescence intensity assay. (Class of assay: confirmatory) [Related pubchem assays (depositor defined):AID1209, AID1220, AID1545, AID1553, AID1574, AID1620]	https://www.ebi.ac.uk/chembl/assay/inspect/CHEMBL1614255	PUBCHEM_BIOASSAY: HTS identification of compounds inhibiting phosphomannose isomerase (PMI) via a fluorescence intensity assay. (Class of assay: confirmatory) [Related pubchem assays: 1220 ]	https://www.ebi.ac.uk/chembl/assay/inspect/CHEMBL1614255
6	CHEMBL1614016	CHEMBL1794352	0.863013698630137	[0.8086,0.9043]	0	0	30	189	0.877551020408163	[0.8108,0.9238]	0	0	18	129	0.0145373217780262	1	0.753371437218346	TRUE	PUBCHEM_BIOASSAY: Counter Screen for Luciferase-based Assay Positives. (Class of assay: confirmatory) [Related pubchem assays: 620, 618, 411 ]	https://www.ebi.ac.uk/chembl/assay/inspect/CHEMBL1794352	PUBCHEM_BIOASSAY: qHTS profiling assay for firefly luciferase inhibitor/activator using purified enzyme and Km concentrations of substrates (counterscreen for miR-21 project). (Class of assay: confirmatory) [Related pubchem assays (depositor defined):AID2288, AID2289, AID2598, AID411]	https://www.ebi.ac.uk/chembl/assay/inspect/CHEMBL1794352
16	CHEMBL1794393	CHEMBL1614512	0.666666666666667	[0.4469,0.8357]	11	8	0	5	0.697916666666667	[0.5945,0.7853]	49	14	15	18	0.03125	1	0.80702959142543	TRUE	PUBCHEM_BIOASSAY: In Vitro MKP-3 Dose Response Assay for SAR Study. (Class of assay: confirmatory) [Related pubchem assays (depositor defined):AID1052, AID1661, AID2085, AID2679, AID425, AID553, AID566]	https://www.ebi.ac.uk/chembl/assay/inspect/CHEMBL1614512	PUBCHEM_BIOASSAY: MKP-3 in vitro HTS assay. (Class of assay: confirmatory) [Related pubchem assays: 1055, 566, 1052, 553, 1054 ]	https://www.ebi.ac.uk/chembl/assay/inspect/CHEMBL1614512
3	CHEMBL1614355	CHEMBL1614052	0.702380952380952	[0.5913,0.7947]	0	7	18	59	0.69811320754717	[0.5549,0.8126]	1	5	11	36	-0.00426774483378256	-1	1	TRUE	PUBCHEM_BIOASSAY: Confirmation Concentration-Response Assay for Antagonists of the Neuropeptide S Receptor: cAMP Signal Transduction. (Class of assay: confirmatory) [Related pubchem assays: 1464, 1461 ]	https://www.ebi.ac.uk/chembl/assay/inspect/CHEMBL1614052	PUBCHEM_BIOASSAY: qHTS Assay for Antagonists of the Neuropeptide S Receptor: cAMP Signal Transduction. (Class of assay: confirmatory)	https://www.ebi.ac.uk/chembl/assay/inspect/CHEMBL1614052
4	CHEMBL1614479	CHEMBL1614052	0.935483870967742	[0.835,0.9791]	0	0	4	58	0.905660377358491	[0.7858,0.9647]	1	0	5	47	-0.0298234936092513	-1	0.730540272666604	TRUE	PUBCHEM_BIOASSAY: Confirmation Concentration-Response Assay for Antagonists of the Neuropeptide S Receptor: Calcium Signal Transduction, SAR for Probe. (Class of assay: confirmatory) [Related pubchem assays: 1493, 1492, 1461, 1489, 1491, 1464 ]	https://www.ebi.ac.uk/chembl/assay/inspect/CHEMBL1614052	PUBCHEM_BIOASSAY: qHTS Assay for Antagonists of the Neuropeptide S Receptor: cAMP Signal Transduction. (Class of assay: confirmatory)	https://www.ebi.ac.uk/chembl/assay/inspect/CHEMBL1614052
9	CHEMBL1614197	CHEMBL1614087	0.737931034482759	[0.6572,0.8058]	0	4	34	107	0.711111111111111	[0.6045,0.7994]	0	0	26	64	-0.0268199233716475	-1	0.654449853864133	TRUE	PUBCHEM_BIOASSAY: Concentration response confirmation assay for inhibitors of ROR gamma transcriptional activity. (Class of assay: confirmatory) [Related pubchem assays: 2551 (Primary screen tested at 6 concentrations from 46 uM to 3 nM)]	https://www.ebi.ac.uk/chembl/assay/inspect/CHEMBL1614087	PUBCHEM_BIOASSAY: qHTS for inhibitors of ROR gamma transcriptional activity. (Class of assay: confirmatory)	https://www.ebi.ac.uk/chembl/assay/inspect/CHEMBL1614087
5	CHEMBL1614539	CHEMBL1614052	0.875	[0.724,0.9531]	0	0	5	35	0.787234042553192	[0.6393,0.888]	1	1	9	36	-0.0877659574468085	-1	0.394825811408642	TRUE	PUBCHEM_BIOASSAY: Confirmation Concentration-Response Assay for Antagonists of the Neuropeptide S Receptor: cAMP Signal Transduction, SAR for Probe. (Class of assay: confirmatory) [Related pubchem assays: 1493, 1492, 2566, 2570, 1461, 1489, 2567, 1491, 1464 ]	https://www.ebi.ac.uk/chembl/assay/inspect/CHEMBL1614052	PUBCHEM_BIOASSAY: qHTS Assay for Antagonists of the Neuropeptide S Receptor: cAMP Signal Transduction. (Class of assay: confirmatory)	https://www.ebi.ac.uk/chembl/assay/inspect/CHEMBL1614052
11	CHEMBL1738575	CHEMBL1614247	0.869565217391304	[0.6533,0.9657]	8	3	0	12	0.75	[0.6235,0.8462]	37	8	8	11	-0.119565217391304	-1	0.377531032704935	TRUE	PUBCHEM_BIOASSAY: SAR analysis of compounds that inhibit NOD2 revised. (Class of assay: confirmatory) [Related pubchem assays (depositor defined):AID1566, AID1575, AID1578, AID1579, AID1848, AID1849, AID1852, AID2469, AID2475, AID2799, AID2800]	https://www.ebi.ac.uk/chembl/assay/inspect/CHEMBL1614247	PUBCHEM_BIOASSAY: uHTS luminescence assay for the identification of compounds that inhibit NOD2. (Class of assay: confirmatory) [Related pubchem assays (depositor defined):AID1575, AID1578, AID1579, AID1848, AID1849, AID1852, AID2001, AID2260, AID2264, AID2334, AID2335, AID2337, AID2466, AID2475, AID2485, AID2503, AID2793, AID2798, AID2799]	https://www.ebi.ac.uk/chembl/assay/inspect/CHEMBL1614247
2	CHEMBL1737868	CHEMBL1738317	1	[0.6555,1]	6	0	0	4	0.814814814814815	[0.7098,0.8893]	57	8	7	9	-0.185185185185185	-1	0.204657661830379	TRUE	PUBCHEM_BIOASSAY: Validation screen for small molecules that induce genotoxicity in human embryonic kidney (HEK293T) cells expressing luciferase-tagged ELG1. (Class of assay: confirmatory) [Related pubchem assays (depositor defined):AID493143, AID504466]	https://www.ebi.ac.uk/chembl/assay/inspect/CHEMBL1738317	PUBCHEM_BIOASSAY: qHTS screen for small molecules that induce genotoxicity in human embryonic kidney (HEK293T) cells expressing luciferase-tagged ELG1. (Class of assay: confirmatory) [Related pubchem assays (depositor defined):AID493106, AID493143]	https://www.ebi.ac.uk/chembl/assay/inspect/CHEMBL1738317
7	CHEMBL1613806	CHEMBL1613949	0.916666666666667	[0.5975,0.9956]	0	0	1	11	0.694915254237288	[0.5598,0.8046]	13	2	16	28	-0.221751412429378	-1	0.160903406341424	TRUE	PUBCHEM_BIOASSAY: In Vitro HePTP Dose Response Colorimetric Assay for SAR Study. (Class of assay: confirmatory) [Related pubchem assays: 521 ]	https://www.ebi.ac.uk/chembl/assay/inspect/CHEMBL1613949	PUBCHEM_BIOASSAY: HTS Discovery of Chemical Inhibitors of HePTP, a Leukemia Target. Inhibition of phosphatase activity by colorimetric assay of released free phosphate (BioMol green). Secondary Screen (Class of assay: confirmatory)	https://www.ebi.ac.uk/chembl/assay/inspect/CHEMBL1613949
8	CHEMBL1614105	CHEMBL1614290	0.962025316455696	[0.9267,0.9814]	1	7	2	227	0.924418604651163	[0.8715,0.9575]	1	5	8	158	-0.0376067118045335	-1	0.120307217545979	TRUE	PUBCHEM_BIOASSAY: AlphaScreen confirmatory assay for validation of inhibitors of SUMOylation. (Class of assay: confirmatory) [Related pubchem assays (depositor defined):AID2006, AID2011, AID2069, AID2614, AID2658]	https://www.ebi.ac.uk/chembl/assay/inspect/CHEMBL1614290	PUBCHEM_BIOASSAY: uHTS HTRF assay for identification of inhibitors of SUMOylation. (Class of assay: confirmatory) [Related pubchem assays (depositor defined):AID2011, AID2018, AID2069, AID2614, AID2658]	https://www.ebi.ac.uk/chembl/assay/inspect/CHEMBL1614290
22	CHEMBL1963940	CHEMBL1794352	1	[0.8076,1]	1	0	0	20	0.873417721518987	[0.775,0.9344]	23	2	8	46	-0.126582278481013	-1	0.114999332643901	TRUE	PUBCHEM_BIOASSAY: Biochemical firefly luciferase enzyme assay for NPC. (Class of assay: confirmatory)	https://www.ebi.ac.uk/chembl/assay/inspect/CHEMBL1794352	PUBCHEM_BIOASSAY: qHTS profiling assay for firefly luciferase inhibitor/activator using purified enzyme and Km concentrations of substrates (counterscreen for miR-21 project). (Class of assay: confirmatory) [Related pubchem assays (depositor defined):AID2288, AID2289, AID2598, AID411]	https://www.ebi.ac.uk/chembl/assay/inspect/CHEMBL1794352
12	CHEMBL1741321	CHEMBL1614110	0.992952783650458	[0.9889,0.9956]	1005	0	20	1813	0.826971371170266	[0.8184,0.8352]	5978	1048	330	608	-0.165981412480192	-1	5.79788321810174e-164	TRUE	PUBCHEM_BIOASSAY: Cytochrome panel assay with activity outcomes. (Class of assay: other) Panel member name: p450-cyp2d6 Compounds with AC50 equal or less than 10 uM are considered active	https://www.ebi.ac.uk/chembl/assay/inspect/CHEMBL1614110	PUBCHEM_BIOASSAY: qHTS Assay for Inhibitors and Substrates of Cytochrome P450 2D6. (Class of assay: confirmatory) [Related pubchem assays: 410 ]	https://www.ebi.ac.uk/chembl/assay/inspect/CHEMBL1614110
15	CHEMBL1741325	CHEMBL1614027	0.989314336598397	[0.9839,0.993]	613	2	22	1609	0.752545824847251	[0.7428,0.762]	4363	1236	708	1549	-0.236768511751147	-1	1.8243377550359e-198	TRUE	PUBCHEM_BIOASSAY: Cytochrome panel assay with activity outcomes. (Class of assay: other) Panel member name: p450-cyp2c9 Compounds with AC50 equal or less than 10 uM are considered active	https://www.ebi.ac.uk/chembl/assay/inspect/CHEMBL1614027	PUBCHEM_BIOASSAY: qHTS Assay for Inhibitors and Substrates of Cytochrome P450 2C9. (Class of assay: confirmatory) [Related pubchem assays: 885, 884, 410 ]	https://www.ebi.ac.uk/chembl/assay/inspect/CHEMBL1614027
13	CHEMBL1741323	CHEMBL1613777	0.98741206960385	[0.9822,0.9911]	695	2	32	1972	0.769661491473657	[0.7602,0.7789]	3683	1016	794	2365	-0.217750578130193	-1	1.20300698644997e-204	TRUE	PUBCHEM_BIOASSAY: Cytochrome panel assay with activity outcomes. (Class of assay: other) Panel member name: p450-cyp2c19 Compounds with AC50 equal or less than 10 uM are considered active	https://www.ebi.ac.uk/chembl/assay/inspect/CHEMBL1613777	PUBCHEM_BIOASSAY: qHTS Assay for Inhibitors and Substrates of Cytochrome P450 2C19. (Class of assay: confirmatory) [Related pubchem assays: 410 ]	https://www.ebi.ac.uk/chembl/assay/inspect/CHEMBL1613777
14	CHEMBL1741324	CHEMBL1613886	0.995312114483099	[0.9925,0.9971]	934	2	17	3100	0.742601687444906	[0.7328,0.7522]	4002	1302	742	1895	-0.252710427038193	-1	0	TRUE	PUBCHEM_BIOASSAY: Cytochrome panel assay with activity outcomes. (Class of assay: other) Panel member name: p450-cyp3a4 Compounds with AC50 equal or less than 10 uM are considered active	https://www.ebi.ac.uk/chembl/assay/inspect/CHEMBL1613886	PUBCHEM_BIOASSAY: qHTS Assay for Inhibitors and Substrates of Cytochrome P450 3A4. (Class of assay: confirmatory) [Related pubchem assays: 410 ]	https://www.ebi.ac.uk/chembl/assay/inspect/CHEMBL1613886
