# Supplementary material for: Large-scale comparison of machine learning methods for drug target prediction on ChEMBL
Source: Royal Society of Chemistry journal article supplement (doi:10.1039/c8sc00148k), 2018-01-01
Supplement: c8sc00148k7.csv [file c8sc00148k7.csv]

	assay	qhtsassay	accQHTS	accQHTSCI	TN1	FN1	FP1	TP1	accCOMP	accCOMPCI	TN2	FN2	FP2	TP2	diff	sign	pval	manually	desc1	link1	desc2	link2
7	CHEMBL1741324	CHEMBL1614108	0.230049261083744	[0.2172,0.2434]	934	3108	18	0	0.734948882998864	[0.7251,0.7446]	4100	1431	669	1723	0.50489962191512	1	0	TRUE	PUBCHEM_BIOASSAY: Cytochrome panel assay with activity outcomes. (Class of assay: other) Panel member name: p450-cyp3a4 Compounds with AC50 equal or less than 10 uM are considered active	https://www.ebi.ac.uk/chembl/assay/inspect/CHEMBL1614108	PUBCHEM_BIOASSAY: qHTS Assay for Activators of Cytochrome P450 3A4. (Class of assay: confirmatory) [Related pubchem assays: 410 ]	https://www.ebi.ac.uk/chembl/assay/inspect/CHEMBL1614108
8	CHEMBL1909138	CHEMBL1613886	0.552486187845304	[0.477,0.6257]	89	0	81	11	0.966666666666667	[0.9434,0.9809]	402	14	0	4	0.414180478821363	1	9.27375632375058e-35	TRUE	DRUGMATRIX: CYP450, 3A4 enzyme inhibition (substrate: 7-Benzyloxy-4-(trifluoromethyl)-coumarin)	https://www.ebi.ac.uk/chembl/assay/inspect/CHEMBL1613886	PUBCHEM_BIOASSAY: qHTS Assay for Inhibitors and Substrates of Cytochrome P450 3A4. (Class of assay: confirmatory) [Related pubchem assays: 410 ]	https://www.ebi.ac.uk/chembl/assay/inspect/CHEMBL1613886
33	CHEMBL1614128	CHEMBL1614304	0.427792915531335	[0.3769,0.4803]	31	203	7	126	0.866666666666667	[0.8089,0.9095]	0	3	23	169	0.438873751135332	1	2.14068680105905e-25	TRUE	PUBCHEM_BIOASSAY: Homogeneous Time-Resolved Fluorescence Resonance Energy Transfer (HTRF) Assay. Confirmatory Screen for inhibitors of association between Mint1-PDZ domains and N-type Ca2+ channel carboxyl-terminal peptide (NC peptide). (Class of assay: confirmatory)	https://www.ebi.ac.uk/chembl/assay/inspect/CHEMBL1614304	PUBCHEM_BIOASSAY: uHTS Homogeneous Terbium Time-Resolved Fluorescence Resonance Energy Transfer (HTRF) Assay. Confirmatory Screen for inhibitors of association between Mint1-PDZ domains and N-type Ca2+ channel carboxyl-terminal peptide (NC peptide). (Class of assay: confirmatory) [Related pubchem assays (depositor defined):AID2093, AID2489, AID2496, AID434980]	https://www.ebi.ac.uk/chembl/assay/inspect/CHEMBL1614304
19	CHEMBL1738673	CHEMBL1614134	0.457070707070707	[0.4074,0.5076]	44	205	10	137	0.882051282051282	[0.8263,0.9222]	0	0	23	172	0.424980574980575	1	3.79887480154362e-25	TRUE	PUBCHEM_BIOASSAY: HSF-1 induced GFP reporter and Doxycycline induced RFP reporter Measured in Cell-Based System Using Plate Reader - 2038-03_Inhibitor_DoseNoFile_CherryPick_Internal-Standard_Set3. (Class of assay: confirmatory) [Related pubchem assays (depositor defined):AID2118]	https://www.ebi.ac.uk/chembl/assay/inspect/CHEMBL1614134	PUBCHEM_BIOASSAY: Luminescence Cell-Based Dose Confirmation HTS to Identify Inhibitors of Heat Shock Factor 1 (HSF1). (Class of assay: confirmatory) [Related pubchem assays: 2118 (Project Summary), 2098 (Primary HTS)]	https://www.ebi.ac.uk/chembl/assay/inspect/CHEMBL1614134
1	CHEMBL1909139	CHEMBL1738091	0.404255319148936	[0.2671,0.5569]	19	24	4	0	0.956818181818182	[0.9322,0.9731]	407	17	2	14	0.552562862669246	1	8.33184331668647e-21	TRUE	DRUGMATRIX: Dopamine D1 radioligand binding (ligand: [3H] SCH-23390)	https://www.ebi.ac.uk/chembl/assay/inspect/CHEMBL1738091	PUBCHEM_BIOASSAY: HTS Assay for Allosteric Agonists of the Human D1 Dopamine Receptor: Primary Screen for Potentiators. (Class of assay: confirmatory) [Related pubchem assays (depositor defined):AID488989, AID488993, AID488995]	https://www.ebi.ac.uk/chembl/assay/inspect/CHEMBL1738091
2	CHEMBL1909190	CHEMBL1794573	0.272727272727273	[0.1161,0.5044]	3	0	16	3	0.983253588516746	[0.9643,0.9926]	409	5	2	2	0.710526315789474	1	2.32521610253616e-19	TRUE	DRUGMATRIX: Potassium Channel HERG radioligand binding (ligand: [3H] Astemizole)	https://www.ebi.ac.uk/chembl/assay/inspect/CHEMBL1794573	PUBCHEM_BIOASSAY: qHTS Assay for Small Molecule Inhibitors of the Human hERG Channel Activity. (Class of assay: confirmatory)	https://www.ebi.ac.uk/chembl/assay/inspect/CHEMBL1794573
5	CHEMBL1909200	CHEMBL1613808	0.684210526315789	[0.5462,0.7973]	38	1	17	1	0.979310344827586	[0.9597,0.9899]	422	8	1	4	0.295099818511797	1	2.14193551815401e-12	TRUE	DRUGMATRIX: Protein Serine/Threonine Kinase, ERK2 enzyme inhibition (substrate: Myelin Basic Protein)	https://www.ebi.ac.uk/chembl/assay/inspect/CHEMBL1613808	PUBCHEM_BIOASSAY: qHTS Assay for Inhibitors of the ERK Signaling Pathway using a Homogeneous Screening Assay. (Class of assay: confirmatory)	https://www.ebi.ac.uk/chembl/assay/inspect/CHEMBL1613808
16	CHEMBL1794303	CHEMBL1614170	0.166666666666667	[0.0294,0.4912]	0	10	0	2	0.955555555555556	[0.9249,0.9745]	0	1	13	301	0.788888888888889	1	3.55694955118178e-11	TRUE	PUBCHEM_BIOASSAY: Inhibitors of Epstein-Barr LMP1 inducible NF-kappaB luciferase reporter Measured in Cell-Based System Using Plate Reader - 2122-01_Inhibitor_Dose_CherryPick_Activity. (Class of assay: confirmatory) [Related pubchem assays (depositor defined):AID504586]	https://www.ebi.ac.uk/chembl/assay/inspect/CHEMBL1614170	PUBCHEM_BIOASSAY: uHTS Fluorescence assay for the identification of cytotoxic compounds among compounds active in NOD1 cell inhibition assay. Cytotoxicity counterscreen. (Class of assay: confirmatory) [Related pubchem assays (depositor defined):AID1566, AID1575, AID1578, AID1852, AID2001, AID2260, AID2264, AID2334, AID2335, AID2466, AID2469, AID2475, AID2503, AID2793, AID2798, AID2799, AID2800]	https://www.ebi.ac.uk/chembl/assay/inspect/CHEMBL1614170
17	CHEMBL1794303	CHEMBL1614276	0.363636363636364	[0.1237,0.6839]	0	7	0	4	0.973053892215569	[0.9477,0.9868]	0	2	7	325	0.609417528579205	1	3.16334413712252e-08	TRUE	PUBCHEM_BIOASSAY: Inhibitors of Epstein-Barr LMP1 inducible NF-kappaB luciferase reporter Measured in Cell-Based System Using Plate Reader - 2122-01_Inhibitor_Dose_CherryPick_Activity. (Class of assay: confirmatory) [Related pubchem assays (depositor defined):AID504586]	https://www.ebi.ac.uk/chembl/assay/inspect/CHEMBL1614276	PUBCHEM_BIOASSAY: uHTS luminescence assay for the identification of compounds that inhibit NOD2 in MDP treated cells. (Class of assay: confirmatory) [Related pubchem assays (depositor defined):AID1566, AID1579, AID1849, AID2260, AID2335, AID2469, AID2503, AID2800]	https://www.ebi.ac.uk/chembl/assay/inspect/CHEMBL1614276
18	CHEMBL1738092	CHEMBL1614134	0.567307692307692	[0.4666,0.663]	10	40	5	49	0.846153846153846	[0.7137,0.9266]	0	4	4	44	0.278846153846154	1	0.000577114184610653	TRUE	PUBCHEM_BIOASSAY: HSF-1 induced GFP reporter and Doxycycline induced RFP reporter Measured in Cell-Based System Using Plate Reader - 2038-03_Inhibitor_DoseNoFile_CherryPick_Activity_Set3. (Class of assay: confirmatory) [Related pubchem assays (depositor defined):AID2118]	https://www.ebi.ac.uk/chembl/assay/inspect/CHEMBL1614134	PUBCHEM_BIOASSAY: Luminescence Cell-Based Dose Confirmation HTS to Identify Inhibitors of Heat Shock Factor 1 (HSF1). (Class of assay: confirmatory) [Related pubchem assays: 2118 (Project Summary), 2098 (Primary HTS)]	https://www.ebi.ac.uk/chembl/assay/inspect/CHEMBL1614134
14	CHEMBL1794303	CHEMBL1613884	0.75	[0.4284,0.9331]	0	3	0	9	0.971098265895954	[0.9458,0.9852]	0	0	10	336	0.221098265895954	1	0.00684251286304979	TRUE	PUBCHEM_BIOASSAY: Inhibitors of Epstein-Barr LMP1 inducible NF-kappaB luciferase reporter Measured in Cell-Based System Using Plate Reader - 2122-01_Inhibitor_Dose_CherryPick_Activity. (Class of assay: confirmatory) [Related pubchem assays (depositor defined):AID504586]	https://www.ebi.ac.uk/chembl/assay/inspect/CHEMBL1613884	PUBCHEM_BIOASSAY: uHTS luminescence assay for the identification of compounds that inhibit NOD1. uHTS luminescence assay for the identification of compounds that inhibit NOD1, utilizing an NF-kB-mediated luciferase reporter gene activity as a measure of NOD1 modulation (Class of assay: confirmatory) [Related pubchem assays (depositor defined):AID1566, AID1575, AID1849, AID1852, AID2250, AID2255, …	https://www.ebi.ac.uk/chembl/assay/inspect/CHEMBL1613884
10	CHEMBL1217000	CHEMBL1794580	0.357142857142857	[0.1398,0.6437]	1	0	9	4	0.64	[0.5637,0.7101]	82	46	17	30	0.282857142857143	1	0.0462764780628327	TRUE	Antimicrobial activity against Plasmodium falciparum	https://www.ebi.ac.uk/chembl/assay/inspect/CHEMBL1794580	PUBCHEM_BIOASSAY: Primary qHTS for delayed death inhibitors of the malarial parasite plastid, 48 hour incubation. (Class of assay: confirmatory) [Related pubchem assays (depositor defined):AID488752, AID488774, AID504848, AID504850]	https://www.ebi.ac.uk/chembl/assay/inspect/CHEMBL1794580
15	CHEMBL1794303	CHEMBL1614030	0.833333333333333	[0.5088,0.9706]	0	2	0	10	0.96551724137931	[0.9389,0.9812]	0	3	9	336	0.132183908045977	1	0.0742089913394994	TRUE	PUBCHEM_BIOASSAY: Inhibitors of Epstein-Barr LMP1 inducible NF-kappaB luciferase reporter Measured in Cell-Based System Using Plate Reader - 2122-01_Inhibitor_Dose_CherryPick_Activity. (Class of assay: confirmatory) [Related pubchem assays (depositor defined):AID504586]	https://www.ebi.ac.uk/chembl/assay/inspect/CHEMBL1614030	PUBCHEM_BIOASSAY: HTS dose response assay for identification of inhibitors of TNFa-specific NF-kB induction. (Class of assay: confirmatory) [Related pubchem assays (depositor defined):AID1566, AID1575, AID1578, AID1579, AID1852, AID2337]	https://www.ebi.ac.uk/chembl/assay/inspect/CHEMBL1614030
9	CHEMBL1217000	CHEMBL1794345	0.444444444444444	[0.224,0.6865]	4	0	10	4	0.660493827160494	[0.5814,0.7318]	77	41	14	30	0.216049382716049	1	0.118127614196889	TRUE	Antimicrobial activity against Plasmodium falciparum	https://www.ebi.ac.uk/chembl/assay/inspect/CHEMBL1794345	PUBCHEM_BIOASSAY: Primary qHTS for delayed death inhibitors of the malarial parasite plastid, 96 hour incubation. (Class of assay: confirmatory) [Related pubchem assays (depositor defined):AID488745, AID488752, AID488774, AID504848, AID504850]	https://www.ebi.ac.uk/chembl/assay/inspect/CHEMBL1794345
26	CHEMBL1614197	CHEMBL1614441	0.608695652173913	[0.5011,0.7071]	7	27	9	49	0.702702702702703	[0.6074,0.7838]	1	2	31	77	0.0940070505287897	1	0.181573493397493	TRUE	PUBCHEM_BIOASSAY: Concentration response confirmation assay for inhibitors of ROR gamma transcriptional activity. (Class of assay: confirmatory) [Related pubchem assays: 2551 (Primary screen tested at 6 concentrations from 46 uM to 3 nM)]	https://www.ebi.ac.uk/chembl/assay/inspect/CHEMBL1614441	PUBCHEM_BIOASSAY: VP16 counterscreen qHTS for inhibitors of ROR gamma transcriptional activity. (Class of assay: confirmatory)	https://www.ebi.ac.uk/chembl/assay/inspect/CHEMBL1614441
20	CHEMBL1614482	CHEMBL1614512	0.454545454545455	[0.1814,0.7544]	3	6	0	2	0.672131147540984	[0.5388,0.7837]	32	14	6	9	0.217585692995529	1	0.188419989532609	TRUE	PUBCHEM_BIOASSAY: MKP-3 in vitro secondary assay for identification of irreversible and slow-binding inhibitors. (Class of assay: confirmatory) [Related pubchem assays (depositor defined):AID1054, AID1055, AID425, AID553, AID566]	https://www.ebi.ac.uk/chembl/assay/inspect/CHEMBL1614512	PUBCHEM_BIOASSAY: MKP-3 in vitro HTS assay. (Class of assay: confirmatory) [Related pubchem assays: 1055, 566, 1052, 553, 1054 ]	https://www.ebi.ac.uk/chembl/assay/inspect/CHEMBL1614512
22	CHEMBL1614016	CHEMBL1614501	0.792682926829268	[0.6861,0.8713]	0	7	10	65	0.854961832061069	[0.7802,0.9082]	1	0	19	111	0.0622789052318004	1	0.262616409962417	TRUE	PUBCHEM_BIOASSAY: Counter Screen for Luciferase-based Assay Positives. (Class of assay: confirmatory) [Related pubchem assays: 620, 618, 411 ]	https://www.ebi.ac.uk/chembl/assay/inspect/CHEMBL1614501	PUBCHEM_BIOASSAY: qHTS Assay for Inhibitors of Firefly Luciferase. (Class of assay: confirmatory) [Related pubchem assays: 2309 (Probe Summary for Inhibitors and Stabilizers of Firefly Luciferase)]	https://www.ebi.ac.uk/chembl/assay/inspect/CHEMBL1614501
6	CHEMBL1737863	CHEMBL1614547	0.5	[0.268,0.732]	1	6	1	6	0.63953488372093	[0.5282,0.7383]	5	2	29	50	0.13953488372093	1	0.378700241802471	TRUE	PUBCHEM_BIOASSAY: Confirmation of compounds inhibiting phosphomannose isomerase (PMI) via a fluorescence intensity assay. (Class of assay: confirmatory) [Related pubchem assays (depositor defined):AID1209, AID1220, AID1545, AID1553, AID1574, AID1620]	https://www.ebi.ac.uk/chembl/assay/inspect/CHEMBL1614547	PUBCHEM_BIOASSAY: HTS identification of compounds inhibiting phosphomannose isomerase (PMI) via a fluorescence intensity assay using a high concentration of mannose 6-phosphate. (Class of assay: confirmatory) [Related pubchem assays: 1209 ]	https://www.ebi.ac.uk/chembl/assay/inspect/CHEMBL1614547
25	CHEMBL1614007	CHEMBL1614441	0.674157303370786	[0.5656,0.7675]	8	25	4	52	0.72289156626506	[0.612,0.8128]	0	1	22	60	0.0487342628942737	1	0.510551149080242	TRUE	PUBCHEM_BIOASSAY: Concentration response confirmation VP16 counterscreen for inhibitors of ROR gamma transcriptional activity. (Class of assay: confirmatory) [Related pubchem assays: 2546 (Primary counterscreen tested in the VP16 cell line at 6 concentrations from 46 uM to 3 nM)]	https://www.ebi.ac.uk/chembl/assay/inspect/CHEMBL1614441	PUBCHEM_BIOASSAY: VP16 counterscreen qHTS for inhibitors of ROR gamma transcriptional activity. (Class of assay: confirmatory)	https://www.ebi.ac.uk/chembl/assay/inspect/CHEMBL1614441
21	CHEMBL1614016	CHEMBL1614192	0.84	[0.6308,0.9475]	0	1	3	21	0.859375	[0.7842,0.9123]	0	1	17	110	0.019375	1	0.760340849326651	TRUE	PUBCHEM_BIOASSAY: Counter Screen for Luciferase-based Assay Positives. (Class of assay: confirmatory) [Related pubchem assays: 620, 618, 411 ]	https://www.ebi.ac.uk/chembl/assay/inspect/CHEMBL1614192	PUBCHEM_BIOASSAY: Luminescence Biochemical Dose Response HTS to Identify Inhibitors of Luciferase. (Class of assay: confirmatory) [Related pubchem assays: 1663 (Primary HTS), 1678 (Summary of Project)]	https://www.ebi.ac.uk/chembl/assay/inspect/CHEMBL1614192
13	CHEMBL1794410	CHEMBL1614499	0.78167115902965	[0.7354,0.8219]	58	50	31	232	0.792079207920792	[0.7283,0.8445]	5	3	39	155	0.0104080488911426	1	0.831598148201096	TRUE	PUBCHEM_BIOASSAY: Fluorescence Cell-Based Dose Response to Characterize Compounds Cytotoxic to RAS-Dependent BJ-TERT-LT-ST Fibroblast. (Class of assay: confirmatory) [Related pubchem assays (depositor defined):AID1554, AID1674]	https://www.ebi.ac.uk/chembl/assay/inspect/CHEMBL1614499	PUBCHEM_BIOASSAY: Luminescence Cell-Based Dose Response HTS to Identify Compounds Cytotoxic to BJ-TERT-LT-ST RAS-Independent Fibroblast. (Class of assay: confirmatory) [Related pubchem assays: 1674 (Project Summary), 1554 (Primary HTS)]	https://www.ebi.ac.uk/chembl/assay/inspect/CHEMBL1614499
12	CHEMBL1794410	CHEMBL1614155	0.750663129973475	[0.7032,0.7929]	24	29	65	259	0.748837209302326	[0.6844,0.8042]	18	17	37	143	-0.00182592067114928	-1	1	TRUE	PUBCHEM_BIOASSAY: Fluorescence Cell-Based Dose Response to Characterize Compounds Cytotoxic to RAS-Dependent BJ-TERT-LT-ST Fibroblast. (Class of assay: confirmatory) [Related pubchem assays (depositor defined):AID1554, AID1674]	https://www.ebi.ac.uk/chembl/assay/inspect/CHEMBL1614155	PUBCHEM_BIOASSAY: Luminescence Cell-Based Dose Confirmation HTS to Identify Compounds Cytotoxic to BJeLR RAS-Dependent Fibroblast. (Class of assay: confirmatory) [Related pubchem assays: 1674 (Project Summary), 1554 (Primary HTS)]	https://www.ebi.ac.uk/chembl/assay/inspect/CHEMBL1614155
28	CHEMBL1963849	CHEMBL1738512	0.826086956521739	[0.6045,0.9428]	2	3	1	17	0.774647887323944	[0.6572,0.8619]	0	1	15	55	-0.0514390691977955	-1	0.772193315686175	TRUE	PUBCHEM_BIOASSAY: SAR analysis of small molecule inhibitors of tim23-1: a luminescent tim10-1 yeast counterscreen. (Class of assay: confirmatory)	https://www.ebi.ac.uk/chembl/assay/inspect/CHEMBL1738512	PUBCHEM_BIOASSAY: Dose Response confirmation of uHTS small molecule inhibitors of tim23-1: a luminescent TIM10 yeast counterscreen. (Class of assay: confirmatory) [Related pubchem assays (depositor defined):AID463212, AID463216, AID493002]	https://www.ebi.ac.uk/chembl/assay/inspect/CHEMBL1738512
11	CHEMBL1794410	CHEMBL1614004	0.771276595744681	[0.7248,0.8121]	30	27	59	260	0.751131221719457	[0.6878,0.8056]	7	3	52	159	-0.0201453740252239	-1	0.618052279777867	TRUE	PUBCHEM_BIOASSAY: Fluorescence Cell-Based Dose Response to Characterize Compounds Cytotoxic to RAS-Dependent BJ-TERT-LT-ST Fibroblast. (Class of assay: confirmatory) [Related pubchem assays (depositor defined):AID1554, AID1674]	https://www.ebi.ac.uk/chembl/assay/inspect/CHEMBL1614004	PUBCHEM_BIOASSAY: Luminescence Cell-Based Dose Response HTS to Identify Compounds Cytotoxic to BJ-TERT RAS-Independent Fibroblast. (Class of assay: confirmatory) [Related pubchem assays: 1674 (Project Summary), 1554 (Primary HTS)]	https://www.ebi.ac.uk/chembl/assay/inspect/CHEMBL1614004
4	CHEMBL2114932	CHEMBL2114818	0.958456973293769	[0.9438,0.9695]	22	20	22	947	0.951923076923077	[0.9289,0.968]	0	0	25	495	-0.00653389637069168	-1	0.598091979625503	TRUE	PubChem BioAssay. Dose response confirmation of small molecule inhibitors of the thioesterase domain of fatty acid synthase via a kinetic, fluorescence intensity assay. (Class of assay: confirmatory)	https://www.ebi.ac.uk/chembl/assay/inspect/CHEMBL2114818	PubChem BioAssay. Dose response confirmation of uHTS inhibitor hits of the thioesterase domain of fatty acid synthase via a fluorescence intensity assay. (Class of assay: confirmatory)	https://www.ebi.ac.uk/chembl/assay/inspect/CHEMBL2114818
30	CHEMBL1794387	CHEMBL1738578	0.775	[0.6114,0.886]	11	4	5	20	0.709219858156028	[0.6258,0.781]	83	32	9	17	-0.0657801418439716	-1	0.548132677244474	TRUE	PUBCHEM_BIOASSAY: SAR Analysis of small molecule inhibitors of Sentrin-specific protease 8 (SENP8) using a Luminescent assay. (Class of assay: confirmatory) [Related pubchem assays (depositor defined):AID2540, AID2575]	https://www.ebi.ac.uk/chembl/assay/inspect/CHEMBL1738578	PUBCHEM_BIOASSAY: Dose Response confirmation of uHTS for inhibitors of Sentrin-specific protease 8 (SENP8) using a Luminescent assay. (Class of assay: confirmatory) [Related pubchem assays (depositor defined):AID2540, AID2575, AID2582, AID434986]	https://www.ebi.ac.uk/chembl/assay/inspect/CHEMBL1738578
24	CHEMBL1614007	CHEMBL1614087	0.725663716814159	[0.6323,0.8034]	2	1	30	80	0.671641791044776	[0.5449,0.7785]	2	4	18	43	-0.0540219257693831	-1	0.499682646404379	TRUE	PUBCHEM_BIOASSAY: Concentration response confirmation VP16 counterscreen for inhibitors of ROR gamma transcriptional activity. (Class of assay: confirmatory) [Related pubchem assays: 2546 (Primary counterscreen tested in the VP16 cell line at 6 concentrations from 46 uM to 3 nM)]	https://www.ebi.ac.uk/chembl/assay/inspect/CHEMBL1614087	PUBCHEM_BIOASSAY: qHTS for inhibitors of ROR gamma transcriptional activity. (Class of assay: confirmatory)	https://www.ebi.ac.uk/chembl/assay/inspect/CHEMBL1614087
32	CHEMBL1794522	CHEMBL1738502	0.8	[0.6386,0.9039]	10	7	1	22	0.714285714285714	[0.6308,0.7858]	76	29	11	24	-0.0857142857142857	-1	0.317303414697983	TRUE	PUBCHEM_BIOASSAY: SAR Analysis of small molecule inhibitors of Sentrin-specific protease 6 (SENP6) using a Luminescent assay. (Class of assay: confirmatory) [Related pubchem assays (depositor defined):AID2582, AID2599]	https://www.ebi.ac.uk/chembl/assay/inspect/CHEMBL1738502	PUBCHEM_BIOASSAY: Dose Response confirmation of uHTS for inhibitors of Sentrin-specific protease 6 (SENP6) using a Luminescent assay. (Class of assay: confirmatory) [Related pubchem assays (depositor defined):AID2575, AID2582, AID2599]	https://www.ebi.ac.uk/chembl/assay/inspect/CHEMBL1738502
29	CHEMBL1963899	CHEMBL1738512	0.869565217391304	[0.6533,0.9657]	2	3	0	18	0.742857142857143	[0.6221,0.8366]	6	8	10	46	-0.126708074534161	-1	0.260526110661565	TRUE	PUBCHEM_BIOASSAY: SAR analysis of small molecule inhibitors of tim23-1: a luminescent TIM10 yeast counterscreen. (Class of assay: confirmatory)	https://www.ebi.ac.uk/chembl/assay/inspect/CHEMBL1738512	PUBCHEM_BIOASSAY: Dose Response confirmation of uHTS small molecule inhibitors of tim23-1: a luminescent TIM10 yeast counterscreen. (Class of assay: confirmatory) [Related pubchem assays (depositor defined):AID463212, AID463216, AID493002]	https://www.ebi.ac.uk/chembl/assay/inspect/CHEMBL1738512
31	CHEMBL1794578	CHEMBL1738495	0.85	[0.6948,0.9375]	2	4	2	32	0.701754385964912	[0.6077,0.7819]	31	15	19	49	-0.148245614035088	-1	0.0925970416971582	TRUE	PUBCHEM_BIOASSAY: SAR Analysis of small molecule inhibitors of Sentrin-specific protease 7 (SENP7) using a Luminescent assay. (Class of assay: confirmatory) [Related pubchem assays (depositor defined):AID434973, AID434986]	https://www.ebi.ac.uk/chembl/assay/inspect/CHEMBL1738495	PUBCHEM_BIOASSAY: Dose Response confirmation of uHTS for inhibitors of Sentrin-specific protease 7 (SENP7) using a Luminescent assay. (Class of assay: confirmatory) [Related pubchem assays (depositor defined):AID434973, AID434986]	https://www.ebi.ac.uk/chembl/assay/inspect/CHEMBL1738495
23	CHEMBL1738684	CHEMBL1614138	1	[0.8799,1]	0	0	0	36	0.866666666666667	[0.7251,0.9446]	1	0	6	38	-0.133333333333333	-1	0.0310989255026563	TRUE	PUBCHEM_BIOASSAY: SAR assay for compounds activating TNAP in the presence of 100 mM DEA performed in a luminescence assay. (Class of assay: confirmatory) [Related pubchem assays (depositor defined):AID1001, AID1056, AID1450, AID1548, AID1941, AID518, AID813]	https://www.ebi.ac.uk/chembl/assay/inspect/CHEMBL1614138	PUBCHEM_BIOASSAY: uHTS identification of compounds activating TNAP in the absence of phosphate acceptor performed in luminescent assay. (Class of assay: confirmatory) [Related pubchem assays: 813, 518, 1548, 1450 ]	https://www.ebi.ac.uk/chembl/assay/inspect/CHEMBL1614138
3	CHEMBL1613776	CHEMBL1614554	0.64484126984127	[0.6011,0.6863]	167	135	44	158	0.55036496350365	[0.5285,0.572]	99	72	852	1032	-0.0944763063376203	-1	0.00013354875343903	TRUE	PUBCHEM_BIOASSAY: Total Fluorescence Counterscreen for Inhibitors of the Interaction of Thyroid Hormone Receptor and Steroid Receptor Coregulator 2. (Class of assay: confirmatory)	https://www.ebi.ac.uk/chembl/assay/inspect/CHEMBL1614554	PUBCHEM_BIOASSAY: qHTS for Inhibitors of the Interaction of Thyroid Hormone Receptor and Steroid Receptor Coregulator 2. (Class of assay: confirmatory)	https://www.ebi.ac.uk/chembl/assay/inspect/CHEMBL1614554
27	CHEMBL1614363	CHEMBL1614311	0.899280575539568	[0.8338,0.9418]	61	1	13	64	0.666666666666667	[0.5388,0.775]	18	7	15	26	-0.232613908872902	-1	0.000119855541310981	TRUE	PUBCHEM_BIOASSAY: In Vitro Bfl-1 Dose Response Fluorescence Polarization Assay for SAR Study. (Class of assay: confirmatory) [Related pubchem assays: 621, 432 ]	https://www.ebi.ac.uk/chembl/assay/inspect/CHEMBL1614311	PUBCHEM_BIOASSAY: TR-FRET secondary assay for HTS discovery of chemical inhibitors of anti-apoptotic protein Bfl-1. (Class of assay: confirmatory) [Related pubchem assays: 432 ]	https://www.ebi.ac.uk/chembl/assay/inspect/CHEMBL1614311
